# Supplementary material for: Targeted Changes of the Cell Wall Proteome Influence Candida albicans Ability to Form Single- and Multi-strain Biofilms
Source: PLoS Pathog. 2014 Dec 11;10(12):e1004542. doi: 10.1371/journal.ppat.1004542 (PMC4263760; doi:10.1371/journal.ppat.1004542)
Supplement: S1 Table — List of strains included in the overexpression collection. Headers: Orf number, orf19 nomenclature from the Assembly 21 version of the Candida albicans genome at the Candida Genome Database (CGD, www.candidagenome.org); Gene name, gene name according to CGD; Category, functional category of the overexpressed open reading frame (ORF); Recipient strain, Lab identifier of the strain background carrying the corresponding ORF; Barcode, barcode sequence matching the corresponding ORF; Forward primer, forward primer used for polymerase chain reaction (PCR)-amplification of the corresponding ORF; Reverse primer, reverse primer used for PCR-amplification of the corresponding ORF. (XLSX) [file ppat.1004542.s011.xlsx]

## Sheet: Feuil1
Orf Number	Gene name	Category	Recipient strain	Barcode	Forward primer	Reverse primer
ORF19.10712	MTLALPHA1	Other	CEC1429	GCACGCTGCATACATTTGTC	GGGACAAGTTTGTACAAAAAAGCAGGCTtgATGGGAAATAAAAAAAAAACTAGAAAGACA	GGGACCACTTTGTACAAGAAAGCTGGGTCTTCATTATGTAAACATCCTCAATTGTACC
MTLALPHA2	MTLALPHA2	Other	CEC1429	TAGACGGTTCGCATTAGCCT	GGGACAAGTTTGTACAAAAAAGCAGGCTtgATGAATTCACATCTGGAGGCACTCTTTGAA	GGGACCACTTTGTACAAGAAAGCTGGGTACCTGTTAATAGCAAAGCAGCCAACTCAGG
ORF19.1002		DNA damage and cell cycle regulators	CEC1121	CCGTCGTATGAATCTACATC	GGGACAAGTTTGTACAAAAAAGCAGGCTTGATGACAAGCACAAGTTCTTATACCAATGTT	GGGACCACTTTGTACAAGAAAGCTGGGTTATCTTTATTCGTTTGGGTTTTTGAGTAAT
ORF19.1028	ELA1	Other	CEC1429	GGCATCACCCAAGACATGGA	GGGACAAGTTTGTACAAAAAAGCAGGCTtgATGGAATCACTACGACCATTGACACAAATT	GGGACCACTTTGTACAAGAAAGCTGGGTACTGAAAATAGATGATTTTAATGGTTTTAA
ORF19.1069	RPN4	Transcription factor	CEC1429	CACGCATTCTAATTCATGGC	GGGACAAGTTTGTACAAAAAAGCAGGCTtgATGACTTCATTAGCTATATTACCACAGTTA	GGGACCACTTTGTACAAGAAAGCTGGGTTACTGGAATATATTCAACATTCTCTTTAGC
ORF19.1105.2	PGA56	Cell surface	CEC1429	GCGCATAGTATATCAGTCTG	GGGACAAGTTTGTACAAAAAAGCAGGCTtgATGCAATTCACCAAAGTTATCGCTTCATTA	GGGACCACTTTGTACAAGAAAGCTGGGTGTACAATAAAGCAGCACCAACAGCAGCTAA
ORF19.1135	CAS1	Transcription factor	CEC1429	TTAGCACCTGTCACATCGGG	GGGACAAGTTTGTACAAAAAAGCAGGCTtgATGAGTTGGCATAATCAATCCAATAAGAAT	GGGACCACTTTGTACAAGAAAGCTGGGTTTTTCTATGAGTCCTTATAAACTCACTGAT
ORF19.115		DNA damage and cell cycle regulators	CEC1121	ATTATAGAGCTAGGGACACG	GGGACAAGTTTGTACAAAAAAGCAGGCTTGATGTGGATAACATATCATAAAGATGATCCA	GGGACCACTTTGTACAAGAAAGCTGGGTACACTTTAAAAATCTATAATTATTGTTTTC
ORF19.1150		Transcription factor	CEC1429	GACCTTGTAGTCAGCTATGT	GGGACAAGTTTGTACAAAAAAGCAGGCTtgATGTATTCACCAACGTTTTCTACTAGAACG	GGGACCACTTTGTACAAGAAAGCTGGGTTGCAGCGGGACTAAAGTCTAACCAATTCCA
ORF19.1178		Transcription factor	CEC1429	TCCACGCAGAGGAGTTAAAG	GGGACAAGTTTGTACAAAAAAGCAGGCTtgATGAACGAATTGTTTGATGCTAATGCAACG	GGGACCACTTTGTACAAGAAAGCTGGGTCACACGACATAGATCAATCTCGAACATGTG
ORF19.1187	CPH2	Transcription factor	CEC1429	AACTATGTTGAACGTGGGTC	GGGACAAGTTTGTACAAAAAAGCAGGCTtgATGTTATCGCAGTATGATGAACAACTTGCT	GGGACCACTTTGTACAAGAAAGCTGGGTCTCTTCATCACTCTCATTAACATCAATTCC
ORF19.1189		DNA damage and cell cycle regulators	CEC1121	GGAAGCACAGGTCTCAACAC	GGGACAAGTTTGTACAAAAAAGCAGGCTTGATGTCGGATTCTGAAGATTCTGAAGATCTA	GGGACCACTTTGTACAAGAAAGCTGGGTACTGTTATCATCTAAATTAATCCGTTTGTT
ORF19.1196	PKH3	Protein kinase	CEC1429	GAGCACACTCTATGAACTGC	GGGACAAGTTTGTACAAAAAAGCAGGCTtgATGTCAGGGTTAGAACATCTACAGAACTTA	GGGACCACTTTGTACAAGAAAGCTGGGTTTTTTGGTGGTGCACAGCTGCTGCTGCTGC
ORF19.1217		Transcription factor	CEC1429	ACTGGCAGACTAGGTCGCAT	GGGACAAGTTTGTACAAAAAAGCAGGCTtgATGGTTAGACCAGACAAAATTGATTATTTC	GGGACCACTTTGTACAAGAAAGCTGGGTCCTTCTGAAATTGAATGTTGATCGACAAAG
ORF19.1220	RVS167	Protein kinase	CEC1429	AAACCTTTAGGAGAGTCTGG	GGGACAAGTTTGTACAAAAAAGCAGGCTtgATGTCATTTAAAGGATTCAAAAAGGGTGTC	GGGACCACTTTGTACAAGAAAGCTGGGTTAATTGCACATAATTACCAGGGAACACACC
ORF19.1223	DBF2	Protein kinase	CEC1429	ACTTGAGGCGTAGACCTGCT	GGGACAAGTTTGTACAAAAAAGCAGGCTtgATGACAAATTTTTTCAATAGATCACCAAAA	GGGACCACTTTGTACAAGAAAGCTGGGTATACAATGTAGCTAATGGATTTAATCTACT
ORF19.1224	FRP3	DNA damage and cell cycle regulators	CEC1121	ATATTGCTGGAACCTGCGGC	GGGACAAGTTTGTACAAAAAAGCAGGCTTGATGTCAGCTGATTTAGAAAATCAACAACCA	GGGACCACTTTGTACAAGAAAGCTGGGTTTTATTTTTTCTTGTTGGATCTTGTAAATC
ORF19.124	CIC1	Other	CEC1429	TCAGTCGAGCCGATGGATCT	GGGACAAGTTTGTACAAAAAAGCAGGCTtgATGGCTAAAACAAGATCTAAATCTGCTGCT	GGGACCACTTTGTACAAGAAAGCTGGGTTTGTGAAAGGGATTTTGTATAAAACAATGG
ORF19.1253	PHO4	Transcription factor	CEC1429	TGAGACGTTCTGTAACCCGG	GGGACAAGTTTGTACAAAAAAGCAGGCTtgATGGACCAGCAAGTTTGGAACCCTATATTT	GGGACCACTTTGTACAAGAAAGCTGGGTCTTCCTTCCTTTCAACTCCTCAACTTCTTT
ORF19.1259		Transcription factor	CEC1429	CCTTACGGTTAATGAGATGG	GGGACAAGTTTGTACAAAAAAGCAGGCTtgATGTCACAAACAACAACAAGACCTAGAAGA	GGGACCACTTTGTACAAGAAAGCTGGGTACTAAGTATATCGCCTAATGATATTTTAGA
ORF19.1275	GAT1	Transcription factor	CEC1429	GAGGCACTATAACCATTACC	GGGACAAGTTTGTACAAAAAAGCAGGCTtgATGATGTATATTAACAACAAATCGATTTTC	GGGACCACTTTGTACAAGAAAGCTGGGTATAATTCATGTTTAACCAATCCCAATCTTG
ORF19.1283	MEC1	Other	CEC1429	ACACCTGAGTAGGCGCGATT	GGGACAAGTTTGTACAAAAAAGCAGGCTtgATGACGTCGAATCAATCAATAAGTACTACT	GGGACCACTTTGTACAAGAAAGCTGGGTCATATAAGCTGCCCAACCTGCATACATTTG
ORF19.130		Other	CEC1429	TGTCACGACCACAAAGGAGC	GGGACAAGTTTGTACAAAAAAGCAGGCTtgATGGGACAGAAATTATCACTATTGGCACCA	GGGACCACTTTGTACAAGAAAGCTGGGTACAGTTAGCAGCTTTATATAATTTGACACA
ORF19.1314		Transcription factor	CEC1429	CTCACTGATGGGTAAGTATG	GGGACAAGTTTGTACAAAAAAGCAGGCTtgATGTCATCTACAAAAGAAACTACTCATGAA	GGGACCACTTTGTACAAGAAAGCTGGGTTAATTTCAAATTCAATCTTTCTTCAGAATT
ORF19.1341	PRR2	Protein kinase	CEC1429	ACATCGGTGGAATCGTGCTC	GGGACAAGTTTGTACAAAAAAGCAGGCTtgATGATGGGGTTTAAGAAAATATTCAAGGTT	GGGACCACTTTGTACAAGAAAGCTGGGTAGTTTTGACTCTGAAGGATTTCCCATGATC
ORF19.1401	EAP1/PGA47	Cell surface	CEC1429	AGTACAAACTAACGGGTTGC	GGGACAAGTTTGTACAAAAAAGCAGGCTtgATGAAAGTTTCTCAAATTTTACCATTAGCT	GGGACCACTTTGTACAAGAAAGCTGGGTCATAAAGTAGACTAATGCAGCCACTGCTAA
ORF19.1434		DNA damage and cell cycle regulators	CEC1121	AAGATGGTGCAAGACTGCCC	GGGACAAGTTTGTACAAAAAAGCAGGCTTGATGTCATTGAAACCATTTACGGGGTTATTA	GGGACCACTTTGTACAAGAAAGCTGGGTCACAAGCACAGCTGATCCATCCAATTTCTC
ORF19.1468	CDC55	Other	CEC1429	GTAGACTATACCTGCATCCG	GGGACAAGTTTGTACAAAAAAGCAGGCTtgATGCCGTCTGATAAAAATTGGAAGTTTTCA	GGGACCACTTTGTACAAGAAAGCTGGGTTAATGTGGAGAAAAGGTATAAATTGTTTGT
ORF19.1476		DNA damage and cell cycle regulators	CEC1121	TCACCGTAACTAGACGTTTC	GGGACAAGTTTGTACAAAAAAGCAGGCTTGATGATTTATGAATTGAGAGACTTTATTCCA	GGGACCACTTTGTACAAGAAAGCTGGGTATATTTTCCACCACTACCACTAGTACTCAT
ORF19.1490	MSB2	Other	CEC1429	GAGTTCCCACCAGATGGATC	GGGACAAGTTTGTACAAAAAAGCAGGCTtgATGTTGGCCAACGTTAAATTGAACCTTGTT	GGGACCACTTTGTACAAGAAAGCTGGGTATGATACCAACCCAATGAATTGGATGCTTG
ORF19.1496		Transcription factor	CEC1429	CATCGAGATTACCGCGTCTG	GGGACAAGTTTGTACAAAAAAGCAGGCTtgATGGTTGAAGCCAATTTTTTAAAATATTTT	GGGACCACTTTGTACAAGAAAGCTGGGTCATATTATATTTATAAGTATTAGTATAATT
ORF19.1499	CTF1	Transcription factor	CEC1429	ATAGAAGGGCAACCCGCCTA	GGGACAAGTTTGTACAAAAAAGCAGGCTtgATGACTGATCAAACTAAAATTAAACTGGAA	GGGACCACTTTGTACAAGAAAGCTGGGTATTCATCATATGAAATAATGAATGAATATC
ORF19.1542	HEX3	DNA damage and cell cycle regulators	CEC1121	CATCGGGATTCACTGCTCGT	GGGACAAGTTTGTACAAAAAAGCAGGCTTGATGAATAGTGACAATAACCCTACACGGGAA	GGGACCACTTTGTACAAGAAAGCTGGGTAAAATAAACTTCAGTAAAACTTTTACTCAG
ORF19.1565		Transcription factor	CEC1429	AGAACTAATCTGCCTGAACG	GGGACAAGTTTGTACAAAAAAGCAGGCTtgATGATAACTCCAGAGAAAAGGACATTGGAC	GGGACCACTTTGTACAAGAAAGCTGGGTTTTATTTTCATAGGCGTTACTTTTATGTTT
ORF19.1574		DNA damage and cell cycle regulators	CEC1121	TAGACTGTGCTCACGCTGCT	GGGACAAGTTTGTACAAAAAAGCAGGCTTGATGGCTCTCAAATTAAAATTGAAGATGCCA	GGGACCACTTTGTACAAGAAAGCTGGGTAAACAAATCATCAAGATCATCAGCATTGTC
ORF19.1576		Transcription factor	CEC1429	CATTACCGAACATGGCGTAC	GGGACAAGTTTGTACAAAAAAGCAGGCTtgATGATAGGTACCGATTCCTATCATATAATT	GGGACCACTTTGTACAAGAAAGCTGGGTTTTCTTCTTTCTTCTATTCTTTCGTGATAC
ORF19.1577		Transcription factor	CEC1429	ACATCAAGACCACGTTGCTA	GGGACAAGTTTGTACAAAAAAGCAGGCTtgATGAATGGAGCAAATCAGAATATCCCTAAC	GGGACCACTTTGTACAAGAAAGCTGGGTAAAAATTCTTCTATCATTGACTGTCCCGGT
ORF19.1589		Transcription factor	CEC1429	GGCACCTAAACAGAGTCGCA	GGGACAAGTTTGTACAAAAAAGCAGGCTtgATGTCACGACAAGATTGGTTCAATGGTCCA	GGGACCACTTTGTACAAGAAAGCTGGGTAAGACCCAATATATTTGATAACTTTGCATC
ORF19.1596	FGR28	DNA damage and cell cycle regulators	CEC1121	CCCGTTGCATGAATATGTTC	GGGACAAGTTTGTACAAAAAAGCAGGCTTGATGAAAGGTATTGAACAATTGAACATGTAT	GGGACCACTTTGTACAAGAAAGCTGGGTCATTTTTCTTCTTTTGATATCACCACCGGC
ORF19.1605	PMS1	DNA damage and cell cycle regulators	CEC1121	TTAGGCGAGACAGACTGCTC	GGGACAAGTTTGTACAAAAAAGCAGGCTTGATGTCGGAGACACTGCCATCGATTAAAACT	GGGACCACTTTGTACAAGAAAGCTGGGTTAATTCATAGTCGACACTAGTCAGTGGAAA
ORF19.1619		Protein kinase	CEC1429	TCGAGTACCGTAGATTCGCT	GGGACAAGTTTGTACAAAAAAGCAGGCTtgATGTCAGATAGATATAGACCAAGAGGCCCT	GGGACCACTTTGTACAAGAAAGCTGGGTGGTTGTTTTAGTATCAAGACTTTTCTCTTC
ORF19.1622	YCG1	DNA damage and cell cycle regulators	CEC1121	CATATCTTCTAACTTGGCCG	GGGACAAGTTTGTACAAAAAAGCAGGCTTGATGGATATACCACCAAAACCAACTCTTAAG	GGGACCACTTTGTACAAGAAAGCTGGGTATCATCCATTGAAATATCACCATAATCAAC
ORF19.1636	STE50	Other	CEC1429	AGTCGCGCTGTCCATTTGCT	GGGACAAGTTTGTACAAAAAAGCAGGCTtgATGGCATCACCAATTAGCAACGACTCCTTT	GGGACCACTTTGTACAAGAAAGCTGGGTCAAAGTCCCACCCGGGATTTCAGTACCTAT
ORF19.1648	RAD50	Other	CEC1429	TATACACGGGAAGCACGAGC	GGGACAAGTTTGTACAAAAAAGCAGGCTtgATGATCCATATTGAAAAACTATTTTCCTTT	GGGACCACTTTGTACAAGAAAGCTGGGTGCCTTCTTGAATTCTACCAATAGGTAAACT
ORF19.166	ASG1	Transcription factor	CEC1429	GGGTACTTCACCATTCCTAG	GGGACAAGTTTGTACAAAAAAGCAGGCTtgATGCCTAAAAGGGAAATTGAAGACACACAA	GGGACCACTTTGTACAAGAAAGCTGGGTAAATGGATCTAAATATTCTAATCCATTAGA
ORF19.1671	UTR2/CSF4	Cell surface	CEC1429	GGCACACATTATTCGCAAAC	GGGACAAGTTTGTACAAAAAAGCAGGCTtgATGAGATTTTCAACACTTCATTTTGCCTTT	GGGACCACTTTGTACAAGAAAGCTGGGTCATGAAAAATGATAATATACCCAAGCAAAT
ORF19.1673	PPT1	Protein phosphatase	CEC1429	CTATTGGATGTCACGGGATT	GGGACAAGTTTGTACAAAAAAGCAGGCTtgATGTCATCACCTAAAGAAGCACTTGAATGG	GGGACCACTTTGTACAAGAAAGCTGGGTAAACCCAAATCCACCTTTAGAATAAGCCAT
ORF19.1674	CDC53	Other	CEC1429	TTGACTGCGAGACTTCCGGT	GGGACAAGTTTGTACAAAAAAGCAGGCTtgATGTCATCTACTCTTCCACCATTCAGTGAT	GGGACCACTTTGTACAAGAAAGCTGGGTACTAATATATTCATAATCATCACCATTTCT
ORF19.1683	PPH21	Protein phosphatase	CEC1429	CCTATAAGCGAACTTCTGAC	GGGACAAGTTTGTACAAAAAAGCAGGCTtgATGGATTTAGATACAGACGTGCCAATGGAA	GGGACCACTTTGTACAAGAAAGCTGGGTTAAGAAATAATCAGGAGTCTTCCTTGTTAC
ORF19.1690	TOS1	Cell surface	CEC1429	AGTCTACCCACATGCTTTAG	GGGACAAGTTTGTACAAAAAAGCAGGCTtgATGAAATTTAGTTCTACTACATTATTGGCT	GGGACCACTTTGTACAAGAAAGCTGGGTGTAACCAATAGTGGCAACAGAACCAGCTTC
ORF19.1699	BZZ1	Protein kinase	CEC1429	GTATAGACACTGACGGACAG	GGGACAAGTTTGTACAAAAAAGCAGGCTtgATGTCAATTGAAACCATATCAATAGGGAAC	GGGACCACTTTGTACAAGAAAGCTGGGTTATCTTTTTAACATAACTAGTTGGGAACAT
ORF19.1714	PGA44	Cell surface	CEC1429	ATCAGAGCCACTGCCAGAAG	GGGACAAGTTTGTACAAAAAAGCAGGCTtgATGTTGAGTACTAATAATTTGCTTATATTA	GGGACCACTTTGTACAAGAAAGCTGGGTAACGAGGTATGCAATAAACACAAGTCCTAA
ORF19.1718	ZCF8	Transcription factor	CEC1429	AATTCGCTCTAAGCTGGGCG	GGGACAAGTTTGTACAAAAAAGCAGGCTtgATGGAAAGTAATCTATCTAATACTGAATCA	GGGACCACTTTGTACAAGAAAGCTGGGTTTCAAAGATATTTGGTTCAACACAATGTTT
ORF19.1729		Transcription factor	CEC1429	GTGCAGACTCAACACCATGA	GGGACAAGTTTGTACAAAAAAGCAGGCTtgATGGAAATTTTCATTAATAAAATATATCCA	GGGACCACTTTGTACAAGAAAGCTGGGTTTTGCCAAATAATTTGAGACCTGAAGCTGC
ORF19.173		Transcription factor	CEC1429	CACAGAGCGGCAAGGACTTA	GGGACAAGTTTGTACAAAAAAGCAGGCTtgATGGGGAAACTGCTGTTTCATCTTCAATTC	GGGACCACTTTGTACAAGAAAGCTGGGTTAAACTTGAACCAGAAATTTGTCCCATAGT
ORF19.175		Transcription factor	CEC1429	CTACTGATGAGGAGCTTGAT	GGGACAAGTTTGTACAAAAAAGCAGGCTtgATGTCACCACACGATATAATTGAAGATAAA	GGGACCACTTTGTACAAGAAAGCTGGGTTTCGCCAAGAGTTTCTCGAATTTTGTTTTG
ORF19.1754	CMK2	Protein kinase	CEC1429	ATACTTCGCCGGAGAGGTCT	GGGACAAGTTTGTACAAAAAAGCAGGCTtgATGTCAACTGATCATCATTCCCATCCAGTT	GGGACCACTTTGTACAAGAAAGCTGGGTGTTTTTATCACCATCTTTTTGTTTCTTTTC
ORF19.1757		Transcription factor	CEC1429	CACGGTACTTCAGATTTCCT	GGGACAAGTTTGTACAAAAAAGCAGGCTtgATGCAAAATACTAACCGTAATAATAGTAAT	GGGACCACTTTGTACAAGAAAGCTGGGTATTCTGTTGATATCCATAAGTTGGAAATTC
ORF19.1759	PHO23	Transcription factor	CEC1429	CAGTCGTACTCATGCTGATG	GGGACAAGTTTGTACAAAAAAGCAGGCTtgATGAGAACAAAGCAACAACAACAACAGCAA	GGGACCACTTTGTACAAGAAAGCTGGGTTTTCAATTTCTTGAGACAATCATCACAATA
ORF19.1760	RAS1	Other	CEC1429	AGTTCGACTGAATCGCCATC	GGGACAAGTTTGTACAAAAAAGCAGGCTtgATGTTGAGAGAATATAAATTAGTTGTTGTT	GGGACCACTTTGTACAAGAAAGCTGGGTAACAATAACACAACATCCATTCTTTGATTT
ORF19.1762	OCA1	Protein phosphatase	CEC1429	ACCGTAGCCGGACTATGTCT	GGGACAAGTTTGTACAAAAAAGCAGGCTtgATGGCTTCAATTACAAGTAATCCTCAAATA	GGGACCACTTTGTACAAGAAAGCTGGGTTTTCAACCAATCGGGGGCCAATTCCCAATT
ORF19.1769		Other	CEC1429	CGGACGACTATAATAATCGC	GGGACAAGTTTGTACAAAAAAGCAGGCTtgATGAATAACGATCCTAAATTTCAAGTACAG	GGGACCACTTTGTACAAGAAAGCTGGGTATCGTAAAAATCGTCATCATCTTCATCATC
ORF19.1777		Other	CEC1429	CTCTAATCGGCAGTCAGGTG	GGGACAAGTTTGTACAAAAAAGCAGGCTtgATGATAACAAATAATAACAATAGTGATAAT	GGGACCACTTTGTACAAGAAAGCTGGGTTTTGATGGAAATCCCTTTTTCAAATAATGC
ORF19.1815		Other	CEC1429	ACAGTCGCGGAAGAGTCATC	GGGACAAGTTTGTACAAAAAAGCAGGCTtgATGGCTACTAGAACTCAATTTGAAAACTCT	GGGACCACTTTGTACAAGAAAGCTGGGTAGAATAAGTTTCAATCAAAGTGTCTCTTAA
ORF19.1822	UME6	Transcription factor	CEC1121	GGAATACGAGTCAAGTGTAC	GGGACAAGTTTGTACAAAAAAGCAGGCTTGATGATTACCCATATGGTTACACCCGATTCA	GGGACCACTTTGTACAAGAAAGCTGGGTATCATTGGTTATATCATTACTTGATTTTTT
ORF19.1824	PGA50	Cell surface	CEC1429	ACGCAGTAGCGACGATTATG	GGGACAAGTTTGTACAAAAAAGCAGGCTtgATGAAGTTAAATTTACTATTATTATTATTT	GGGACCACTTTGTACAAGAAAGCTGGGTACACAAACTGAGAACAAACAACAATAACGT
ORF19.1826	MDM34	Transcription factor	CEC1429	TATGTTCTGACAGCCTCCGG	GGGACAAGTTTGTACAAAAAAGCAGGCTtgATGTCGTTCAAAGTAAATTGGAATTCATTA	GGGACCACTTTGTACAAGAAAGCTGGGTACAATATGGTGGTGGTGGTGCCACTGATGG
ORF19.1842	BUD5	Other	CEC1429	GGTACAGACACTGCGACAAC	GGGACAAGTTTGTACAAAAAAGCAGGCTtgATGTTTCAACAACCAAACTATTCAGATCCA	GGGACCACTTTGTACAAGAAAGCTGGGTACTAACATCTCTTGGTTGAATCTTACAACT
ORF19.1850	SIW14	Protein phosphatase	CEC1429	AATCGACTGGAAGTGTCTGC	GGGACAAGTTTGTACAAAAAAGCAGGCTtgATGTCCGATTATATGGATGATCCATTTCAA	GGGACCACTTTGTACAAGAAAGCTGGGTATCCCATTTCAATGGCAACAAATCATACTC
ORF19.1901	MCM3	Other	CEC1429	GCGCGAAGAGCATATTAGAC	GGGACAAGTTTGTACAAAAAAGCAGGCTtgATGGATGAACGATTTTTGAATCCACCACCT	GGGACCACTTTGTACAAGAAAGCTGGGTAATCTTCCAAATCTTATCACTTTCTAGGTA
ORF19.1911	PGA52	Cell surface	CEC1429	AGGCACTCACTCTAAGGCAG	GGGACAAGTTTGTACAAAAAAGCAGGCTtgATGTTATTTTCATCATTGTTAGTATCTACA	GGGACCACTTTGTACAAGAAAGCTGGGTAATAACCCAAAGTGTAAGCACCGTCATAAG
ORF19.1936	SNF1	Protein kinase	CEC1429	GTGCTCTCAATAAAGCCACA	GGGACAAGTTTGTACAAAAAAGCAGGCTtgATGTCAGAGCAAGCCCAAACTCAGGTCTCT	GGGACCACTTTGTACAAGAAAGCTGGGTTCCACTTTGACTATTTACGGCTAATTCCAT
ORF19.1943		DNA damage and cell cycle regulators	CEC1121	TGTACCACGAAATCATGCCA	GGGACAAGTTTGTACAAAAAAGCAGGCTTGATGGAAGAATTGCTGTTTATAATCTATTTA	GGGACCACTTTGTACAAGAAAGCTGGGTTCCTTCTATAAAATCCGTATTAAAAATAAT
ORF19.1944	GPR1	Other	CEC1429	ACCCTTACAGGAGGTGCAAG	GGGACAAGTTTGTACAAAAAAGCAGGCTtgATGCCGGACCTAATATCAATAGCAACCCTG	GGGACCACTTTGTACAAGAAAGCTGGGTCATTGGGGGTCCTTTTTTGAGAAATTCCAT
ORF19.1949	VPS1	Other	CEC1429	CGGATATTCTTCACAGGTGT	GGGACAAGTTTGTACAAAAAAGCAGGCTtgATGGATGAGACATTGATTGCCACCATTAAC	GGGACCACTTTGTACAAGAAAGCTGGGTAACACTAGAAACAATTTCACTAGCATTTCT
ORF19.1956		DNA damage and cell cycle regulators	CEC1121	GAGGCTTGCACATCCAGTTC	GGGACAAGTTTGTACAAAAAAGCAGGCTTGATGATCCCTTTGAGACAGATTGTCGGTAGG	GGGACCACTTTGTACAAGAAAGCTGGGTTTGTTTATCTACAGTTGCCTGCTGTTTGTC
ORF19.1960	CLN3	Other	CEC1429	CATTGGATTAGACCGTGTGT	GGGACAAGTTTGTACAAAAAAGCAGGCTtgATGTTTCCTAATTCACCTGATGCTTTCCAT	GGGACCACTTTGTACAAGAAAGCTGGGTTTGTTGAAGATAGAAAAGTGTACCATAATT
ORF19.1971	TRY3	Transcription factor	CEC1429	CCTACCGTCAGGATATTATG	GGGACAAGTTTGTACAAAAAAGCAGGCTtgATGAAGTTTGCCAAGACATTAGAGCGAACC	GGGACCACTTTGTACAAGAAAGCTGGGTCATGACAATACATTTCTCACCTGAATTAGC
ORF19.1985		Protein kinase	CEC1429	TCGACCAAAGAACCTGTTGA	GGGACAAGTTTGTACAAAAAAGCAGGCTtgATGTCTGCTCCAGAACTTACTGATATTAGA	GGGACCACTTTGTACAAGAAAGCTGGGTTAAAACTGAAGTTTTCTTTGTCTTGTTAAC
ORF19.1989	DCW1/PGA51	Cell surface	CEC1429	TCAGGAGTGGAATGCACCTC	GGGACAAGTTTGTACAAAAAAGCAGGCTtgATGAAGTTCTCAATATATTTAATAATATCT	GGGACCACTTTGTACAAGAAAGCTGGGTTAATATCAACCACACACAGGACCCTACTAA
ORF19.20	RTS1	Protein phosphatase	CEC1429	AGGAACATCTTGGCAATGAC	GGGACAAGTTTGTACAAAAAAGCAGGCTtgATGATGAAAGGATTTAAAAACAGATTGACC	GGGACCACTTTGTACAAGAAAGCTGGGTAATGACTCCACTAGCTGGATGTTGTGGTTG
ORF19.2014	BCY1	Other	CEC1429	TCCACGGCGAGCAGTTTATG	GGGACAAGTTTGTACAAAAAAGCAGGCTtgATGTCTAATCCTCAACAACAATTCATATCT	GGGACCACTTTGTACAAGAAAGCTGGGTATGACCAGCAGTTGGGTCTTGACTCTTTGT
ORF19.2033	PGA19	Cell surface	CEC1429	GTGCATATAAGACACCGTAC	GGGACAAGTTTGTACAAAAAAGCAGGCTtgATGTTCTCCACCACTTCCATAGTTTTATGG	GGGACCACTTTGTACAAGAAAGCTGGGTAAAGATAATACAAAATAGCAAGATATATAA
ORF19.2044	PGA27	Cell surface	CEC1429	ACTATTATGGCAGATGACGG	GGGACAAGTTTGTACAAAAAAGCAGGCTtgATGCATTTTACAAGTAGCCTACTAGCCACC	GGGACCACTTTGTACAAGAAAGCTGGGTCAAAATGAACAATAGACAAGTTCCTAGTAG
ORF19.2054	FGR15	Transcription factor	CEC1429	AATCTCCAGGCATTGCGAGG	GGGACAAGTTTGTACAAAAAAGCAGGCTtgATGGAATCCACATTAAGTGTATCTGATGAA	GGGACCACTTTGTACAAGAAAGCTGGGTCTTATTGAAAGTTACTTCTTCCTCTCCAGA
ORF19.2060	SOD5/PGA3	Cell surface	CEC1429	CTTACTCTGGCGATGAGCGT	GGGACAAGTTTGTACAAAAAAGCAGGCTtgATGAAGTATTTGTCCATTTTCTTACTTGCT	GGGACCACTTTGTACAAGAAAGCTGGGTAATCAAGGCAGCAATGACACCAACTACACC
ORF19.2062	SOD4/PGA2	Cell surface	CEC1429	CCACTGGATACAGATTCATC	GGGACAAGTTTGTACAAAAAAGCAGGCTtgATGAAATACTTGTCTATTATTTCAATTGTT	GGGACCACTTTGTACAAGAAAGCTGGGTAATTAAAGCAGCAACAACACCGGCAATACC
ORF19.207	PGA55	Cell surface	CEC1429	ACCCAGTAGTGAACAGGAGC	GGGACAAGTTTGTACAAAAAAGCAGGCTtgATGGTATTGTTGTGCAAATATAAGGTTTCT	GGGACCACTTTGTACAAGAAAGCTGGGTAGCAATAATATAAGCTAAAATCAAACCAAC
ORF19.2084	CDH1	DNA damage and cell cycle regulators	CEC1121	TGCCTACGCAAAGCGAGCAA	GGGACAAGTTTGTACAAAAAAGCAGGCTTGATGGACAAAAGAGATTCTAATAGACCTTCT	GGGACCACTTTGTACAAGAAAGCTGGGTGCGCAACTGCAGAAATGCTCCTAACAAAAC
ORF19.2093	RFA1	DNA damage and cell cycle regulators	CEC1121	TCACCCTGTGCATTAGTGCT	GGGACAAGTTTGTACAAAAAAGCAGGCTTGATGTCTAGTTTACAATTATCCAAGGGCGCC	GGGACCACTTTGTACAAGAAAGCTGGGTTTTTAATAGTTGATCCAATTTTTTGATCAA
ORF19.2097		Transcription factor	CEC1429	TCAAGCGAATCCCATGTGAC	GGGACAAGTTTGTACAAAAAAGCAGGCTtgATGAAAGTTATAAAGAAAAGGTTCTTCAAA	GGGACCACTTTGTACAAGAAAGCTGGGTTTCCTCAAAAAGGATTTGTATTTCTTCGAT
ORF19.2102	CKB1	Other	CEC1429	GACAGGAGCTATAATGACTC	GGGACAAGTTTGTACAAAAAAGCAGGCTtgATGCCTAGCGATCCAGAAGAAGACTATATA	GGGACCACTTTGTACAAGAAAGCTGGGTCTCGCTGGCCATTGTTCGATCGTCATCTTC
ORF19.2105		Transcription factor	CEC1429	CCATCCATGAGATATGTGAG	GGGACAAGTTTGTACAAAAAAGCAGGCTtgATGTTTAAGAAGAGGGTCATAAAGGATTCA	GGGACCACTTTGTACAAGAAAGCTGGGTAACTTGAGTTGCGCTCAATTTGTCTATATT
ORF19.2108	SOD6/PGA9	Cell surface	CEC1429	GCGCCATGCAAATGAGCCAA	GGGACAAGTTTGTACAAAAAAGCAGGCTtgATGATCTTTATTCCCATTATCATATTAATC	GGGACCACTTTGTACAAGAAAGCTGGGTAACAAATATTCCTGCAGCTATTCCCAATAC
ORF19.217		Transcription factor	CEC1429	AATTCGGCTCAACATGGGCC	GGGACAAGTTTGTACAAAAAAGCAGGCTtgATGCTGTTTTCCCAAGTTCAAACAACTTTA	GGGACCACTTTGTACAAGAAAGCTGGGTTATGGATGGGTTATTATCAGTTGTAGGTAA
ORF19.220	PIR1/PIR2	Cell surface	CEC1429	GCGCGATACATATACATCTC	GGGACAAGTTTGTACAAAAAAGCAGGCTtgATGAAGTATTCTACACTTGTTAGTATTGCT	GGGACCACTTTGTACAAGAAAGCTGGGTACAGTTGACAAATTCAATGACACTTAATTT
ORF19.2204.2	RHO2	Other	CEC1429	GTATCATATCCATGTCCACG	GGGACAAGTTTGTACAAAAAAGCAGGCTtgATGTCAGAATCAGTTAGAAGAAAGCTAGTT	GGGACCACTTTGTACAAGAAAGCTGGGTTAGTATGGTACAACATCCTGTATTGGCTTT
ORF19.2222		Protein kinase	CEC1429	GCAAGAAATACAGCGGGCTC	GGGACAAGTTTGTACAAAAAAGCAGGCTtgATGAATTTTGGAACTAGTCATAGCAGTAGT	GGGACCACTTTGTACAAGAAAGCTGGGTTCTCTTGAACGAGAATTCCCAAGTAATGGT
ORF19.223		Protein kinase	CEC1429	AGACACCATGTGCCAATCTA	GGGACAAGTTTGTACAAAAAAGCAGGCTtgATGGTACAACTAGCTCTATTCACCAATAAC	GGGACCACTTTGTACAAGAAAGCTGGGTCCTTTTCAAAAAACTTTTTTGACGGAAAGA
ORF19.2236	FHL1	Transcription factor	CEC1429	CCCTCGATGAAATGACTACA	GGGACAAGTTTGTACAAAAAAGCAGGCTtgATGAGTCATATAGATGGTGATGATCATATG	GGGACCACTTTGTACAAGAAAGCTGGGTTTCTGTTTTGGCAATTTTATTAGTAGCTTG
ORF19.2237	SPR1	Cell surface	CEC1429	AGATTGCATGAACCGCCAGC	GGGACAAGTTTGTACAAAAAAGCAGGCTtgATGTTTAGATCTTCTATATCTATATCAGTA	GGGACCACTTTGTACAAGAAAGCTGGGTAAAAATCAGCAAATAATATACAAATATAAT
ORF19.2267	RFA2	DNA damage and cell cycle regulators	CEC1121	GGCAGAACCAGCAATTTCCA	GGGACAAGTTTGTACAAAAAAGCAGGCTTGATGTCAGATTTTGAATACGATAATAACAAT	GGGACCACTTTGTACAAGAAAGCTGGGTAATCACAAGATAACTGTTGTCATCATAACC
ORF19.2268	RCK2	Protein kinase	CEC1429	TAGGCATGTAGCATTACCGG	GGGACAAGTTTGTACAAAAAAGCAGGCTtgATGAAAAGAAAGCAACAACAGCAGCCACAG	GGGACCACTTTGTACAAGAAAGCTGGGTGCTGCTTTGAATAGGAATCTGTTTGTTCTT
ORF19.2277	TPK2	Protein kinase	CEC1429	CCTATAATGCCATGTGATGC	GGGACAAGTTTGTACAAAAAAGCAGGCTtgATGGTGAATCTTTTAAAGAAACTTCACATC	GGGACCACTTTGTACAAGAAAGCTGGGTAAAGTCAAGGAAATACAGAGCATAAGGATC
ORF19.2280	ZCF10	Transcription factor	CEC1429	ACATGCGAGGAATCGTCAGC	GGGACAAGTTTGTACAAAAAAGCAGGCTtgATGCTGGAATCAGAGGACCCAAACAAAAAG	GGGACCACTTTGTACAAGAAAGCTGGGTCTTTACGTTCGGATTATGGTTATTAGGTTG
ORF19.229		Transcription factor	CEC1429	ACACGTCTGACAGTTGCATG	GGGACAAGTTTGTACAAAAAAGCAGGCTtgATGATTATTCCAATGACGATAGAATGTGGT	GGGACCACTTTGTACAAGAAAGCTGGGTCCACCAACCATCATCATCATCATCATCATT
ORF19.2320		Protein kinase	CEC1429	GCACTACTATAATCCGAGTC	GGGACAAGTTTGTACAAAAAAGCAGGCTtgATGTCTTCAGAAGAAATTTTGCAAGGAGTA	GGGACCACTTTGTACAAGAAAGCTGGGTTTTACCTGTTTTACGTTTATTTATGATCTT
ORF19.2324	UBA4	Protein phosphatase	CEC1429	GCATGATCGTAATGGACTAG	GGGACAAGTTTGTACAAAAAAGCAGGCTtgATGTCCGAACCTTCAAAGGAAGAGCTCCTT	GGGACCACTTTGTACAAGAAAGCTGGGTATATTTTGGAATTTTCGAATCCACATCATC
ORF19.233.1	HRT1	Other	CEC1429	ATGGACGATCTGGTAACACG	GGGACAAGTTTGTACAAAAAAGCAGGCTtgATGGCTGACGATCAAGATCGCATGGACGTT	GGGACCACTTTGTACAAGAAAGCTGGGTATTACCCAATTTTTGATAAGTCCAATTAGT
ORF19.2331	ADA2	Transcription factor	CEC1429	GCGCACTTCTACTAATATCG	GGGACAAGTTTGTACAAAAAAGCAGGCTtgATGGATTCAAGAACAAAATTATTCCATTGT	GGGACCACTTTGTACAAGAAAGCTGGGTCCCCTGAGAACACCATCCCATATGCACAAA
ORF19.2356	CRZ2	Transcription factor	CEC1429	CAGGTCTGACGATTTAGTGT	GGGACAAGTTTGTACAAAAAAGCAGGCTtgATGTTATCAACCATGTCTAATTTGCCTATT	GGGACCACTTTGTACAAGAAAGCTGGGTTTTATTAGATTGTAATAATTTTTTAATAAA
ORF19.2379	NOT4	Transcription factor	CEC1429	CCCGAAGCGAAATCGTTTAA	GGGACAAGTTTGTACAAAAAAGCAGGCTtgATGGATATATCCGACAAAAATTTCAAACCT	GGGACCACTTTGTACAAGAAAGCTGGGTTCTTTTCCCGCTCATCAATTGAGTTAACAA
ORF19.239		DNA damage and cell cycle regulators	CEC1121	TGACGCGCCAAAGGCATCAA	GGGACAAGTTTGTACAAAAAAGCAGGCTTGATGAATGGGTCAGCTATTGCCAATGGTAAT	GGGACCACTTTGTACAAGAAAGCTGGGTTTCTTGATTAGCTAATTTCTCATCAAGTAA
ORF19.2393		Transcription factor	CEC1429	GTGGTCGCCCAAGCAACAAA	GGGACAAGTTTGTACAAAAAAGCAGGCTtgATGTGTGACAAAGGTATAAATTGCAAATAT	GGGACCACTTTGTACAAGAAAGCTGGGTTAGAACTACATAATCTTCATTCTCTTCAAT
ORF19.2395	IME2	Protein kinase	CEC1429	ATATCGACCATCCGCGTAAG	GGGACAAGTTTGTACAAAAAAGCAGGCTtgATGTCACGACACCATTCTTTCCCACTTGAT	GGGACCACTTTGTACAAGAAAGCTGGGTTAAATTCACAACTTCCTCACTATCTAAAGA
ORF19.2399		Transcription factor	CEC1429	AGATACCGTCCCAGTTGCTG	GGGACAAGTTTGTACAAAAAAGCAGGCTtgATGAAAACATGTTACTATGAATTATTAGAA	GGGACCACTTTGTACAAGAAAGCTGGGTTTTGCGTTTATTTTTCTTTTTTGATTTCGA
ORF19.2417	SMC5	DNA damage and cell cycle regulators	CEC1121	GAGCGACTCCGATTCGTACT	GGGACAAGTTTGTACAAAAAAGCAGGCTTGATGTCATCTGAAAGCAACGGATCGGCTTCC	GGGACCACTTTGTACAAGAAAGCTGGGTTACAGCAAAATCTAACATACCCATACTATT
ORF19.2423	ZCF11	Transcription factor	CEC1429	CAATCTGACGTGGAGCCAGT	GGGACAAGTTTGTACAAAAAAGCAGGCTtgATGAAGATTAAACAGGAAAACATAACAAAC	GGGACCACTTTGTACAAGAAAGCTGGGTTAGTATTGGTAAAAAGTTCCCCACAATCAT
ORF19.2429		DNA damage and cell cycle regulators	CEC1121	TATGGCACTACAGAGCCTGC	GGGACAAGTTTGTACAAAAAAGCAGGCTTGATGTTAGAGTATTTACTGCTCAATTCCCTC	GGGACCACTTTGTACAAGAAAGCTGGGTGTTATCTTCCTCAATATCTTCTTCACTCTC
ORF19.2432	HAC1	Transcription factor	CEC1429	CCCAGGTAATAATTTGCCAC	GGGACAAGTTTGTACAAAAAAGCAGGCTtgATGGAGTTAACTGTTGATAACACCAATACT	GGGACCACTTTGTACAAGAAAGCTGGGTAAGTCCAACTGAAATGATTCTATTGGCTCT
ORF19.2447		Other	CEC1429	AGCCTAACGATCCATGTAAG	GGGACAAGTTTGTACAAAAAAGCAGGCTtgATGCCCTATTCAAATCCCGACTCATCAGTC	GGGACCACTTTGTACAAGAAAGCTGGGTACACCAAGTGAAAACAGGTGGTTTACTGGT
ORF19.2451	PGA45	Cell surface	CEC1429	CCCTGAGTGTAAGGTTATCG	GGGACAAGTTTGTACAAAAAAGCAGGCTtgATGCAATTTTTATTCACATTTATATTTCTA	GGGACCACTTTGTACAAGAAAGCTGGGTCAAGAACAATAAAGCACCACCAAATAAAAT
ORF19.2458	SIP5	Transcription factor	CEC1429	ACCGTAGTCGCAGGTTTGAT	GGGACAAGTTTGTACAAAAAAGCAGGCTtgATGGGTAATGTACCAGCTAAAGAAACAAGA	GGGACCACTTTGTACAAGAAAGCTGGGTTTTTTTATTCTCTTTATTGGCATTTCGTTT
ORF19.2475	PGA26	Cell surface	CEC1429	AGAGCACTTTAACCACGGGC	GGGACAAGTTTGTACAAAAAAGCAGGCTtgATGCACTTTTCAAAAATTATTGCTGGTTCT	GGGACCACTTTGTACAAGAAAGCTGGGTCATCATGGCAGCAGCAATAGCGACCACACC
ORF19.2504	BMS1	Other	CEC1429	CCCGTGAATATAAGTGAAGC	GGGACAAGTTTGTACAAAAAAGCAGGCTtgATGGAACAACAACAACAATCTAATAAAGCC	GGGACCACTTTGTACAAGAAAGCTGGGTAACTCTTTGCTTTTTACCAAATGCCTGACC
ORF19.2519		DNA damage and cell cycle regulators	CEC1121	GCTCTGAACATAGCATCAAC	GGGACAAGTTTGTACAAAAAAGCAGGCTTGATGTCCGCCGATGAAAATAACAAAGTGAGA	GGGACCACTTTGTACAAGAAAGCTGGGTTTTTTCTTCAAGGATATCTATTAATTTGTC
ORF19.2528		Transcription factor	CEC1429	GCCGAGTTAAGAAGCACCAC	GGGACAAGTTTGTACAAAAAAGCAGGCTtgATGAGTAGTTTAGTTAAAAAGGGAGGAACT	GGGACCACTTTGTACAAGAAAGCTGGGTCACATTAGTCTCTCTCTTCTTTCGTACATC
ORF19.2534	PIN4	DNA damage and cell cycle regulators	CEC1121	GCCCATGATAAATCTCTGCA	GGGACAAGTTTGTACAAAAAAGCAGGCTTGATGGATTTTAGAAATTTATCAACTACACCG	GGGACCACTTTGTACAAGAAAGCTGGGTTTTTGGTCCCCAAATACCACTTCCACTAGT
ORF19.2538	PTC2	Protein phosphatase	CEC1429	TTCCAACAGCGGGACAAGGA	GGGACAAGTTTGTACAAAAAAGCAGGCTtgATGGGTCAAATCCTTTCACAACCAGTAGTT	GGGACCACTTTGTACAAGAAAGCTGGGTAACTTCATCATCTATTTTTTCAGAAATTTC
ORF19.2540	SAS3	Transcription factor	CEC1429	GACCAGCATTATCTCCAAAG	GGGACAAGTTTGTACAAAAAAGCAGGCTtgATGGTTCTGCACCTACTAAATCAATTAAAA	GGGACCACTTTGTACAAGAAAGCTGGGTAGCTTTTAATTTGAATGTTCCTCTTGGTCT
ORF19.255	ZCF1	Transcription factor	CEC1429	CCTCATATCGCATTAGATCG	GGGACAAGTTTGTACAAAAAAGCAGGCTtgATGAGTTCCGCGTTACTTCCAATTTCTTGT	GGGACCACTTTGTACAAGAAAGCTGGGTATAGTTGTAAAAATTGCCAATTGAATCAAT
ORF19.259		Transcription factor	CEC1429	TGAGCCTATCGCACACTTGG	GGGACAAGTTTGTACAAAAAAGCAGGCTtgATGGACAACCTGTTTATATTTGACTTACCT	GGGACCACTTTGTACAAGAAAGCTGGGTTTTCATAACATCATGATCTATTAAACCTTG
ORF19.2612		Transcription factor	CEC1429	GCGTAATCACCGATAATCTC	GGGACAAGTTTGTACAAAAAAGCAGGCTtgATGGTTAAACAGAAACAAAAACGTATCAAA	GGGACCACTTTGTACAAGAAAGCTGGGTTGTATTTTCAGTGTTGTTTATTTGATCTAA
ORF19.2614	RSR1	Other	CEC1429	AGCCGCAATGACAGCTTATA	GGGACAAGTTTGTACAAAAAAGCAGGCTtgATGAGAGATTATAAAGTCGTAGTATTGGGT	GGGACCACTTTGTACAAGAAAGCTGGGTCATAATTGTGCAGCACTTGCTTCCTGAGCT
ORF19.2647	ZCF14	Transcription factor	CEC1429	GACGAGTATAGATCATAGCG	GGGACAAGTTTGTACAAAAAAGCAGGCTtgATGCCAATAACAAAAAACAACAACACACCC	GGGACCACTTTGTACAAGAAAGCTGGGTTTTTTTCAATTGTGCCAATATTGACCAAAA
ORF19.2649	PCL1	Other	CEC1429	AACTGCTCTTAATGTCACGG	GGGACAAGTTTGTACAAAAAAGCAGGCTtgATGATTTCTTCAATTGATTTACAAGCTTTA	GGGACCACTTTGTACAAGAAAGCTGGGTAAAGTTATTGGCAACATTATAACCATAAGC
ORF19.2674		Transcription factor	CEC1429	ATATCTGCGCCAGTGCGATG	GGGACAAGTTTGTACAAAAAAGCAGGCTtgATGGAAGATAAAACAAAGCGGCAACACTCA	GGGACCACTTTGTACAAGAAAGCTGGGTGTCAGTTTCATAAGCAATGTTCAAATTAGC
ORF19.2678	BUB1	Protein kinase	CEC1429	TAGATAGGCGCAGCTTCCTC	GGGACAAGTTTGTACAAAAAAGCAGGCTtgATGGTGATACAGAAACTGCCACAAACTGCT	GGGACCACTTTGTACAAGAAAGCTGGGTATTCACCCGAGCTCTATTTATCGAGTTTAG
ORF19.2685	PGA54	Cell surface	CEC1429	GGAGGCAGTACACTACCTTC	GGGACAAGTTTGTACAAAAAAGCAGGCTtgATGCGTGCCAACTATTTGTTATTATTAGCT	GGGACCACTTTGTACAAGAAAGCTGGGTCAAAGAGTAGTAAGAACTGATTGGTGGGGC
ORF19.2695	UBR1	Transcription factor	CEC1429	GGAGTCTAACCAGCTATGCC	GGGACAAGTTTGTACAAAAAAGCAGGCTtgATGAATCCAGATTTGCTTAAAGTATTTTTG	GGGACCACTTTGTACAAGAAAGCTGGGTATCGACCCACTCAAATAGTCCAATACCATC
ORF19.2699	ABP1	Protein kinase	CEC1429	CCAGCGAATGTCGATCAATC	GGGACAAGTTTGTACAAAAAAGCAGGCTtgATGGAAAAAATTGACATTAATACAAATTCA	GGGACCACTTTGTACAAGAAAGCTGGGTCTCATTCAAGACAACATAGTTAGCAGGGAA
ORF19.2706	CRH11	Cell surface	CEC1429	ATATTCAGACCAGCGCAGGC	GGGACAAGTTTGTACAAAAAAGCAGGCTtgATGAAGTTCACTACACTCGCTACTATAGCA	GGGACCACTTTGTACAAGAAAGCTGGGTAACAAATAAGAAACCAATCAATGCAACAAA
ORF19.2728		DNA damage and cell cycle regulators	CEC1121	GGGATTCACACATTAACCAC	GGGACAAGTTTGTACAAAAAAGCAGGCTTGATGGTACCACCCAGGAGGAAAAAACCAAAG	GGGACCACTTTGTACAAGAAAGCTGGGTGACTTTACCTTGTGTTAAAAGTAATTCTAA
ORF19.2745	UME3	Transcription factor	CEC1429	CAGCGGAATCCATATTAAGC	GGGACAAGTTTGTACAAAAAAGCAGGCTtgATGGTATTTTCGATATACGGGTCTAGTGGA	GGGACCACTTTGTACAAGAAAGCTGGGTTTGAGTATTACTAGTTCTCAATCCTGCTTT
ORF19.2752	ADR1	Transcription factor	CEC1429	AATTCGCCATCAGGTTCCGG	GGGACAAGTTTGTACAAAAAAGCAGGCTtgATGATTTCACCAACTCACCAGAGTCAATAC	GGGACCACTTTGTACAAGAAAGCTGGGTACCATTCAAAGTAGATTCATTATCAATTAA
ORF19.2753	ZCF15	Transcription factor	CEC1429	TGAGGAACACGGTGCAATAC	GGGACAAGTTTGTACAAAAAAGCAGGCTtgATGGATGCCGATTTAGAGAAAAGAACTAAA	GGGACCACTTTGTACAAGAAAGCTGGGTATTGGGTTTCACATCATATAAAATATCACT
ORF19.2762	AHP1	Other	CEC1429	CATGGCATTGAAGCTCACTC	GGGACAAGTTTGTACAAAAAAGCAGGCTtgATGACTGACGGTAAATTCCCAACTAACATT	GGGACCACTTTGTACAAGAAAGCTGGGTATTGTGGATTCTCTTTAAAATGGTTTCAGC
ORF19.2765	PGA62	Cell surface	CEC1429	CCTTGAAGCTAAGTGCATTC	GGGACAAGTTTGTACAAAAAAGCAGGCTtgATGCAATTCTCATCCGCTGTCGTCTTATCC	GGGACCACTTTGTACAAGAAAGCTGGGTAAACAAAGCAGCCAAAGCCAACAAACCAGC
ORF19.2767	PGA59	Cell surface	CEC1429	CATCTATGCGAACTTATGCC	GGGACAAGTTTGTACAAAAAAGCAGGCTtgATGCAATTCTCATCCGCTATTATCTTATCT	GGGACCACTTTGTACAAGAAAGCTGGGTCATGAAAGCACCCAAAGCCAACAAACCGGC
ORF19.2771	BEM3	Other	CEC1429	CCGCCACTAATAGAATTGGA	GGGACAAGTTTGTACAAAAAAGCAGGCTtgATGATGAAATCAACTACAATAATGGCAAGG	GGGACCACTTTGTACAAGAAAGCTGGGTTACACCGAAAATAGTATCAAATTCAACCAA
ORF19.2781		Protein kinase	CEC1429	TTAGAGCGACGAGACTCACG	GGGACAAGTTTGTACAAAAAAGCAGGCTtgATGAGTATTTCATCAACTGCTAGTACATCA	GGGACCACTTTGTACAAGAAAGCTGGGTAATAATGGTAGCAGTAGCATTAGTATTTAT
ORF19.2791	BBC1	Protein kinase	CEC1429	CCCAGCGAGCTAAAGATTCA	GGGACAAGTTTGTACAAAAAAGCAGGCTtgATGAAAGTTAAGGCAATTTTTGATTACAAA	GGGACCACTTTGTACAAGAAAGCTGGGTCCAACCAACAAATTGTCTTCCAACTGGTCT
ORF19.2808	ZCF16	Transcription factor	CEC1429	GACCATACTGCATACTAAGC	GGGACAAGTTTGTACAAAAAAGCAGGCTtgATGTCAAAGAAAAATAAAAAATCTGATGAA	GGGACCACTTTGTACAAGAAAGCTGGGTATATTGGGGACTTTGAGATGAAGGCGGTGG
ORF19.2823	RFG1	Transcription factor	CEC1429	ATTATTGAGCCCGCGCTGTG	GGGACAAGTTTGTACAAAAAAGCAGGCTtgATGTCTACTGCTATCTACTATTCAACTCAT	GGGACCACTTTGTACAAGAAAGCTGGGTTTGTGGAGGTTGTTGTTGATGATGATGTTG
ORF19.2833	PGA34	Cell surface	CEC1429	GCCCAGGTTTAATAATCCTC	GGGACAAGTTTGTACAAAAAAGCAGGCTtgATGAAATTCACCAATTTAATTTGTTCATCT	GGGACCACTTTGTACAAGAAAGCTGGGTTAATAAAACTGCAGCAAGGGCAAGTAATCC
ORF19.2843	RHO1	Other	CEC1429	GCCTAATTTACAAGCGCCTA	GGGACAAGTTTGTACAAAAAAGCAGGCTtgATGGTTAACGGTCCAGCTGAACTTCGTAGA	GGGACCACTTTGTACAAGAAAGCTGGGTCAAGACAACACATTTCTTCTTCTTTTCCTT
ORF19.2876	CBF1	Transcription factor	CEC1429	GGTCTATCATAATCCAGCTC	GGGACAAGTTTGTACAAAAAAGCAGGCTtgATGGAAATCGATGCTGAATTGTTAACCCAA	GGGACCACTTTGTACAAGAAAGCTGGGTTTTCTTCCCTCTCTTCAATTGTTCGATTTC
ORF19.2878	PGA15	Cell surface	CEC1429	CAAGCGGTCACAATGCGTCA	GGGACAAGTTTGTACAAAAAAGCAGGCTtgATGAAGTTCATTATTATATTATTTACCTTA	GGGACCACTTTGTACAAGAAAGCTGGGTAATTAAACCTAAAACAAAAACAAAAAATGT
ORF19.2879	IFF5	Cell surface	CEC1429	CACAGTCACTCATTAGTCGG	GGGACAAGTTTGTACAAAAAAGCAGGCTtgATGAAATTGTTCCAGAATATCCTTATTTCA	GGGACCACTTTGTACAAGAAAGCTGGGTCATAATCATCATTAATCCAAAAACTACCAA
ORF19.2886	CEK1	Protein kinase	CEC1429	ATAATGCTGGGCAACGTCCC	GGGACAAGTTTGTACAAAAAAGCAGGCTtgATGAATATAGATCAACATCATCAGCTTCAA	GGGACCACTTTGTACAAGAAAGCTGGGTTAATGGCTTCATAATCTCTTCATATAACAA
ORF19.2906	PGA41	Cell surface	CEC1429	AATATGTAGCACACGCCAGC	GGGACAAGTTTGTACAAAAAAGCAGGCTtgATGAAGTTTACTATTGTATTATTTACCTTG	GGGACCACTTTGTACAAGAAAGCTGGGTAATCAACCCTAAGACCAAAATCATAAATGT
ORF19.2907	PGA42	Cell surface	CEC1429	CGGTAACGTATAATCCTGTC	GGGACAAGTTTGTACAAAAAAGCAGGCTtgATGAAGTTTATTATACTATTATTTGCTTTA	GGGACCACTTTGTACAAGAAAGCTGGGTGACAAATAAACTGAGGAAGAAAAGGAAAAA
ORF19.2961		Transcription factor	CEC1429	GGGATTTAACCTCCACGTTC	GGGACAAGTTTGTACAAAAAAGCAGGCTtgATGAGCAATCCAAACGAAAGTGAACCACAC	GGGACCACTTTGTACAAGAAAGCTGGGTACCACGTAACAACTCTTCATCATATTCATC
ORF19.2969	RAD16	Transcription factor	CEC1429	GGGCTGAAGACACACCACTA	GGGACAAGTTTGTACAAAAAAGCAGGCTtgATGGCACCTTCAAGAAACGACGTAGCAGAT	GGGACCACTTTGTACAAGAAAGCTGGGTATTCATAAACAAGAATTGCAAATCATCGGG
ORF19.2983	CDC73	DNA damage and cell cycle regulators	CEC1121	GATCCAAGCGTAGCCAACTA	GGGACAAGTTTGTACAAAAAAGCAGGCTTGATGAGTTCATCTTCTCCACTCAAAGCTTTT	GGGACCACTTTGTACAAGAAAGCTGGGTGTACAGCTTCCCATATCCCTTATTGACAAG
ORF19.3001	TEM1	Other	CEC1429	ATATAGACCCGGCCAGTGTG	GGGACAAGTTTGTACAAAAAAGCAGGCTtgATGGAAGAAGATAATCAACAGGATCAGAAT	GGGACCACTTTGTACAAGAAAGCTGGGTCTTATATATCAATATGGGTTCCCCCACGTT
ORF19.3010.1	ECM33	Cell surface	CEC1429	AGATGGCACTCACGTCACTG	GGGACAAGTTTGTACAAAAAAGCAGGCTtgATGCAATTCAAGAACATTCTTGCTATTACT	GGGACCACTTTGTACAAGAAAGCTGGGTGAATAAAGCAACACCAACAGCAGCAAAAGC
ORF19.3012	ARO80	Transcription factor	CEC1429	AGCCGTGACGTTATCGACTT	GGGACAAGTTTGTACAAAAAAGCAGGCTtgATGTCAATTGTCGAACCAGAAGTTGCCGAG	GGGACCACTTTGTACAAGAAAGCTGGGTATTCAAAAAACTCCACAAGTCAACAATATT
ORF19.3014	BMH1	Other	CEC1429	AAAGATGAGGGCAGCCTTCT	GGGACAAGTTTGTACAAAAAAGCAGGCTtgATGCCAGCCTCCCGTGAAGATTCCGTTTAC	GGGACCACTTTGTACAAGAAAGCTGGGTTTCTTGATCAGCCTTACCTTCTGTTGGTTG
ORF19.3018	SPP1	Transcription factor	CEC1429	AGCGAGTCCTCACTTTATCT	GGGACAAGTTTGTACAAAAAAGCAGGCTtgATGGACCCCGATACTACTCAATACGATAAG	GGGACCACTTTGTACAAGAAAGCTGGGTAGATTCGTATACACTGATAGAATAATTTCT
ORF19.3049		Protein kinase	CEC1429	ACTAGGGACTAACTTCGCTC	GGGACAAGTTTGTACAAAAAAGCAGGCTtgATGAGAATCATTAAAGATAAGAAACAGACA	GGGACCACTTTGTACAAGAAAGCTGGGTAATATGTTTTTCGAGTTCTTCCACAATAGC
ORF19.3071	MIH1	Protein phosphatase	CEC1429	CAGACACCTGAATTTGTAGC	GGGACAAGTTTGTACAAAAAAGCAGGCTtgATGTTACATAATGAAGACTTTATCCCGAAT	GGGACCACTTTGTACAAGAAAGCTGGGTGCAATGTGTTCCATCCTTATGATTATGGTA
ORF19.3077	VID21	Transcription factor	CEC1429	GGCACCATTTAATCCCAAAG	GGGACAAGTTTGTACAAAAAAGCAGGCTtgATGAACGATACTTGGAGGTCTCGATTAAAG	GGGACCACTTTGTACAAGAAAGCTGGGTCGCGTTGTTTGGCGACCCTGACATGGGCGA
ORF19.3083		Protein phosphatase	CEC1429	AAAGCAGGTGTCAGAACGTC	GGGACAAGTTTGTACAAAAAAGCAGGCTtgATGAACACTTTACGAAGAAGAAGAATACCA	GGGACCACTTTGTACAAGAAAGCTGGGTAATAGTCATATAGTATACATTTAATATAAA
ORF19.3088		Transcription factor	CEC1429	TCGCAGTACGTTAAGTGTCG	GGGACAAGTTTGTACAAAAAAGCAGGCTtgATGGTATGTGCACATACTCATCCCCCCATC	GGGACCACTTTGTACAAGAAAGCTGGGTAGCCAATGCTTTTCTTGACTTTCTTCTCTT
ORF19.3093	MSH2	DNA damage and cell cycle regulators	CEC1121	GAGCTGATCTCATGCTTCCT	GGGACAAGTTTGTACAAAAAAGCAGGCTTGATGTCTAGTACCAAAATAGATCTCAAATTC	GGGACCACTTTGTACAAGAAAGCTGGGTTAAAGTGTCAACTATATAATTTATAAACTT
ORF19.3127	CZF1	Transcription factor	CEC1429	TTCCGTTGAACAAGGGAGAA	GGGACAAGTTTGTACAAAAAAGCAGGCTtgATGAGTTCAATACCCAATATCAATTGGAAT	GGGACCACTTTGTACAAGAAAGCTGGGTTTTACTTCTGTATTCAACAATACCTCTCAA
ORF19.3149	LSP1	Other	CEC1429	TGAGGCTCCGCATCTCTGAT	GGGACAAGTTTGTACAAAAAAGCAGGCTtgATGCATAGAACTTATTCTTTAAGATCCACT	GGGACCACTTTGTACAAGAAAGCTGGGTAGCAGCAATTTTAGCTTCAACTTCATCAAA
ORF19.3153	MSS4	Other	CEC1429	CTACAGTGCTAGACAGCCAG	GGGACAAGTTTGTACAAAAAAGCAGGCTtgATGTTATCTACAATTGGTCCATCATCATCA	GGGACCACTTTGTACAAGAAAGCTGGGTGTTCCGCTTCTTTTTTAATTGAGTTGTACC
ORF19.3174	CDC24	Other	CEC1429	TCAATGGTGAGCAATGCGTA	GGGACAAGTTTGTACAAAAAAGCAGGCTtgATGGAACATCCACCAGCAGCTCTCAGAACA	GGGACCACTTTGTACAAGAAAGCTGGGTAGAAACCCACACTGTCACCAGTCGTTTTTC
ORF19.3178		Transcription factor	CEC1429	AACGTCTCGTCAGAGGGTCT	GGGACAAGTTTGTACAAAAAAGCAGGCTtgATGAGTAATTTCATTGAAGTCCAGAGGTCT	GGGACCACTTTGTACAAGAAAGCTGGGTTAATAACCCTTGTTTTTTCAAATCTATATA
ORF19.3187	ZNC1	Transcription factor	CEC1429	AAGCGTTGACAAGCTAGTGA	GGGACAAGTTTGTACAAAAAAGCAGGCTtgATGCTGGATGTTAATGATACACTTAATCCT	GGGACCACTTTGTACAAGAAAGCTGGGTTATATTTTGCTCATTAAATCCTAAAGACGG
ORF19.3188	TAC1	Transcription factor	CEC1429	CCATCCAGCATAGTAATCAG	GGGACAAGTTTGTACAAAAAAGCAGGCTtgATGGACACTTCACTGTCACTGGGAACTCAC	GGGACCACTTTGTACAAGAAAGCTGGGTAATCCCCAAATTATTGTCAAAGAAAAAATT
ORF19.3199	PIKA	Other	CEC1429	ACAGAGCTACAAGGTTTGGA	GGGACAAGTTTGTACAAAAAAGCAGGCTtgATGCCAGTAGCACCCCATGAATTGAGAGAT	GGGACCACTTTGTACAAGAAAGCTGGGTACTATAAATTCCTTGCGTTATCATTTGAAA
ORF19.3200	MTLA2	Other	CEC1429	ACCTGTAGAGTAAGTGTCAG	GGGACAAGTTTGTACAAAAAAGCAGGCTtgATGCCATATACCTTTAATTTTCCAAAGCTG	GGGACCACTTTGTACAAGAAAGCTGGGTTTGAAAAACGTCCTCAGTATAGATGCCATA
ORF19.3201	MTLA1	Transcription factor	CEC1429	AAACGTGTACTAAGCGCCAG	GGGACAAGTTTGTACAAAAAAGCAGGCTtgATGAACTCAGAAATAGAAAGTAGCTTAACA	GGGACCACTTTGTACAAGAAAGCTGGGTGTTAGCAATATTCTGTTTGATAATACATAC
ORF19.3207	CCN1	Other	CEC1429	CCTGGTGGCAAAGGCAACAA	GGGACAAGTTTGTACAAAAAAGCAGGCTtgATGACATCTTTACAACAACAAAGAGTCAAA	GGGACCACTTTGTACAAGAAAGCTGGGTTTGATGATATTGATGATGATGTTGATATAA
ORF19.3231	CDC27	DNA damage and cell cycle regulators	CEC1121	CGCTTCGAGTATGGGATATT	GGGACAAGTTTGTACAAAAAAGCAGGCTTGATGCATTCTACTACAGGAGGAAGAATAGGA	GGGACCACTTTGTACAAGAAAGCTGGGTACTCTTTTTCAATGATTCCATAGCTTCACG
ORF19.3252	DAL81	Transcription factor	CEC1429	TATGCTCCAGCCACTTTGGG	GGGACAAGTTTGTACAAAAAAGCAGGCTtgATGGATAATCAATCACCAAATTTTATGGAT	GGGACCACTTTGTACAAGAAAGCTGGGTTTTGGTTAGTTCGGGTGATTTTACTGGACT
ORF19.3256	SLN1	Protein kinase	CEC1429	GCAACTCTTCTGCCAGTATT	GGGACAAGTTTGTACAAAAAAGCAGGCTtgATGAGGAGATTAAAGATTGGGATTCGACCC	GGGACCACTTTGTACAAGAAAGCTGGGTTGAAGTAACGACTTCATTTGATAAAAATTC
ORF19.3263	ATO10	DNA damage and cell cycle regulators	CEC1121	TTAGCGACACCATGCTGTGC	GGGACAAGTTTGTACAAAAAAGCAGGCTTGATGTCAAGTGGAGATTCTGATTCAAATTCA	GGGACCACTTTGTACAAGAAAGCTGGGTAATTGGTAATGCAATCTGTTCTTTATTTGA
ORF19.3264	CCE1	DNA damage and cell cycle regulators	CEC1121	TCAGTGGACACAGCGTTCTC	GGGACAAGTTTGTACAAAAAAGCAGGCTTGATGATTCAAAAACTGTATCTCATCGAACGA	GGGACCACTTTGTACAAGAAAGCTGGGTGTCTATACTCCCAGGTTTTAATTCCAATTC
ORF19.3281		Transcription factor	CEC1429	TTACAGAGAGGTTCAGACAG	GGGACAAGTTTGTACAAAAAAGCAGGCTtgATGCCAATTAATTCTGAGTCATGTCCCTTG	GGGACCACTTTGTACAAGAAAGCTGGGTCACGGCAGTACCATACAAATCCTCTTTCCA
ORF19.3294	MBF1	Transcription factor	CEC1429	ACCAGATGTATAACCTCGTC	GGGACAAGTTTGTACAAAAAAGCAGGCTtgATGTCTTCAGATTGGGATTCAGTTACTATT	GGGACCACTTTGTACAAGAAAGCTGGGTTTTTTTCTTAGCAAACAAAGGTTCACCAAT
ORF19.3300	ZPR1	Transcription factor	CEC1429	AATTGACCGGCATTCGCTGG	GGGACAAGTTTGTACAAAAAAGCAGGCTtgATCGTACACAATATCTCTCAAATGTCTGAA	GGGACCACTTTGTACAAGAAAGCTGGGTATCAGTTTTAATATCATTTAAACCTAATCC
ORF19.3302		Protein phosphatase	CEC1429	GCCTAGAGCAAACTATCTCA	GGGACAAGTTTGTACAAAAAAGCAGGCTtgATGGAAACCATAGAAAATTCCCACAATGTA	GGGACCACTTTGTACAAGAAAGCTGGGTTGTTCCCAAAAACGATGAAATCGTGAATGA
ORF19.3305	ZCF17	Transcription factor	CEC1429	GCACGAGTTGCATATTTGTG	GGGACAAGTTTGTACAAAAAAGCAGGCTtgATGACGAAAACTACAGTCCAAAGAAGACGT	GGGACCACTTTGTACAAGAAAGCTGGGTTCTATTCAGCGAAAACAAGCTATCTAGTAT
ORF19.3308	STB5	Transcription factor	CEC1429	TATGACGGACGACATGCCTC	GGGACAAGTTTGTACAAAAAAGCAGGCTtgATGAGACCAATAGACTCCATAGTTTCCAAG	GGGACCACTTTGTACAAGAAAGCTGGGTAAAATTGTACATGAAATCAGTATCGATACA
ORF19.3330	CRL1	Other	CEC1429	TTGAACCAGCCCGTACTGAG	GGGACAAGTTTGTACAAAAAAGCAGGCTtgATGACACCCAACGGCAGTAGGAGACATTCG	GGGACCACTTTGTACAAGAAAGCTGGGTCAATATTACACACTTTTTTTTCTTCTTTCT
ORF19.3415	PTK2	Protein kinase	CEC1429	GCCGATGAGATAATAGTAGC	GGGACAAGTTTGTACAAAAAAGCAGGCTtgATGACAAAGGAACATTCAATTCGGAACATT	GGGACCACTTTGTACAAGAAAGCTGGGTCCTGCGGCTTGAGTTAGAAACGTTACTTAC
ORF19.3425		Transcription factor	CEC1429	GATGCGCCCTCAGTTTGTCT	GGGACAAGTTTGTACAAAAAAGCAGGCTtgATGTCAACGACGATACCAACGTCTTCATCA	GGGACCACTTTGTACAAGAAAGCTGGGTAACCCTATTCATAACCGTTTCCGTCCTTGT
ORF19.3434	TRY5	Transcription factor	CEC1429	CAATACGTGGTAAAGGTCGA	GGGACAAGTTTGTACAAAAAAGCAGGCTtgATGGCTGCACAAAAGAAATACATTTGTGCC	GGGACCACTTTGTACAAGAAAGCTGGGTGCCTACGGTCTGTGCCAAGATCCCTAATGT
ORF19.3449		Transcription factor	CEC1429	TCATACTAGGCAGGAGCACG	GGGACAAGTTTGTACAAAAAAGCAGGCTtgATGTCAACTACTCAAGATTCGAAAAAAACA	GGGACCACTTTGTACAAGAAAGCTGGGTGATTGCATTACTGAATAACAATTTCTCTTG
ORF19.3456		Protein kinase	CEC1429	ATCCTCCAGCGATGATAGGG	GGGACAAGTTTGTACAAAAAAGCAGGCTtgATGAATTATACTAGAGTCAATTCAAGTGAA	GGGACCACTTTGTACAAGAAAGCTGGGTGTTATCCTGTTCCATTCTATTAATCCATGA
ORF19.3459		Protein kinase	CEC1121	AGTTCGACCCACGCATTAAG	GGGACAAGTTTGTACAAAAAAGCAGGCTTGATGCCTCAATCATCGTCAACTTTTATAAAT	GGGACCACTTTGTACAAGAAAGCTGGGTTGATTTCACAAATTCATTTTTCAAAGATCC
ORF19.3474	IPL1	Protein kinase	CEC1429	AGCGTAACGTAACTTCACTC	GGGACAAGTTTGTACAAAAAAGCAGGCTtgATGATGCTTCCACGTAACTCACCACATCGT	GGGACCACTTTGTACAAGAAAGCTGGGTTTTGTAAATATTTTTTGGCCATTTTGGTTT
ORF19.35		Protein kinase	CEC1429	GGTAACACCCAACTTAGCGA	GGGACAAGTTTGTACAAAAAAGCAGGCTtgATGACTATTGAAAGTAGATATCAAGCAGCA	GGGACCACTTTGTACAAGAAAGCTGGGTTATTTTACATTCACATGTATAACCCGGTAA
ORF19.3506	DBR1	Protein phosphatase	CEC1429	TTCTCCCGCAGATTGTGTGG	GGGACAAGTTTGTACAAAAAAGCAGGCTtgATGTCAAATACCTTGAAGATTGCCATTGAA	GGGACCACTTTGTACAAGAAAGCTGGGTTTGGTCCGACTCTTTAGATAAAACTAGTTT
ORF19.3530	CKA2	Protein kinase	CEC1429	CCCAAATGAAGAGTCGATGC	GGGACAAGTTTGTACAAAAAAGCAGGCTtgATGATTAGCTCAAAATCAAGACCATACTCA	GGGACCACTTTGTACAAGAAAGCTGGGTTATCTTGAAAAATGGATGTTCCATTGCCTC
ORF19.3534	RHO3	Other	CEC1429	ATTGTCAAGTGCTGCGAACG	GGGACAAGTTTGTACAAAAAAGCAGGCTtgATGCCTCTTTGTGGTGGTGGTCAAAAAACA	GGGACCACTTTGTACAAGAAAGCTGGGTCATAACTACACAACCTTTCTTTTGTGGTTC
ORF19.3551	DAD2	DNA damage and cell cycle regulators	CEC1121	GATCTAACGACACTCTGAGC	GGGACAAGTTTGTACAAAAAAGCAGGCTTGATGCTGAAAACAAATACTGCTATATACCAA	GGGACCACTTTGTACAAGAAAGCTGGGTTTCCGTGGATTCTTCAACTTCTTCACTATC
ORF19.3561	CDC7	Protein kinase	CEC1429	CCGGTAGCTGAACAGATTTA	GGGACAAGTTTGTACAAAAAAGCAGGCTtgATGCAAGAAGTTTTGTTTACATACCATCAA	GGGACCACTTTGTACAAGAAAGCTGGGTAGATAAAATTACTTCATCTTCTTCTTCTTC
ORF19.3613		DNA damage and cell cycle regulators	CEC1121	TCAGGCCAGCTCATTCATGG	GGGACAAGTTTGTACAAAAAAGCAGGCTTGATGTCCTCAAATAAATCACTGAAACCAATA	GGGACCACTTTGTACAAGAAAGCTGGGTTTCTTCTTTAGTCTCAACTTCTTGTTGTTG
ORF19.3642	SUN41	Other	CEC1429	GATGCAACCGTGCCCAAGTA	GGGACAAGTTTGTACAAAAAAGCAGGCTtgATGAGATTTTCACAAGCTACTGTTTTAGCC	GGGACCACTTTGTACAAGAAAGCTGGGTATTATACAAGACAAAGTCAGCTTCACCAGA
ORF19.3669	SHA3	Protein kinase	CEC1429	TGAGTACACCTACATCAGTC	GGGACAAGTTTGTACAAAAAAGCAGGCTtgATGACACTCGATATATTACCAATATTTGAT	GGGACCACTTTGTACAAGAAAGCTGGGTACAGTATTCAACACTTTGACTAGGCGTCTC
ORF19.3683	AGE3	Transcription factor	CEC1429	CGAGCTAAGGTACTTGAAAG	GGGACAAGTTTGTACAAAAAAGCAGGCTtgATGTCCATTGATCCAGAAACTCGTAGAAAA	GGGACCACTTTGTACAAGAAAGCTGGGTAAAGTCATCCCATTTATCATCATCATCATC
ORF19.3715	ASF1	DNA damage and cell cycle regulators	CEC1121	CGACTACCCTAATGTGTTTC	GGGACAAGTTTGTACAAAAAAGCAGGCTTGATGTCGATAGTATCATTAACAGGAATTGAA	GGGACCACTTTGTACAAGAAAGCTGGGTGTCTTTTGGAGTATTTACTTTTGCTTCTTC
ORF19.3738	PGA22	Cell surface	CEC1429	TAGTATATGACACCACAGCC	GGGACAAGTTTGTACAAAAAAGCAGGCTtgATGAAGTATTCGACTTTAGCTTGGCTTGTT	GGGACCACTTTGTACAAGAAAGCTGGGTTAAGAACAATAAGGCAACCAAATATCCCAA
ORF19.3740	PGA23	Cell surface	CEC1429	AAGGCAGACTACTCGATCCG	GGGACAAGTTTGTACAAAAAAGCAGGCTtgATGAGAGTTTCCACATTAGTTTTATCCACA	GGGACCACTTTGTACAAGAAAGCTGGGTAATCAAAACCAATGCTGCTAAGGCAACAGC
ORF19.3751		Protein kinase	CEC1429	CAACCGAGTCTAATACATGC	GGGACAAGTTTGTACAAAAAAGCAGGCTtgATGTCGACAATCCCATCGCAAGTTGAAATA	GGGACCACTTTGTACAAGAAAGCTGGGTACCAACTCTGACACTTCTTCTTTTGAAAAA
ORF19.3752	RAD51	DNA damage and cell cycle regulators	CEC1121	ACGACTTCTTAACTGTCTCG	GGGACAAGTTTGTACAAAAAAGCAGGCTTGATGACTCAAACAGAAATTGAACAAGTTGAT	GGGACCACTTTGTACAAGAAAGCTGGGTCTCATTATCTTCAACTTTTGGATCACCAAT
ORF19.3753	SEF1	Transcription factor	CEC1429	CAGATAGGCACAGATGATGC	GGGACAAGTTTGTACAAAAAAGCAGGCTtgATGAAGTTTGAAAAAGGTAAAGTGAGAATT	GGGACCACTTTGTACAAGAAAGCTGGGTTTTCTCTTGCATCATATTAACATCAAACCA
ORF19.3764	GSG1	DNA damage and cell cycle regulators	CEC1121	TTACCGGAGAAAGGAGCCCA	GGGACAAGTTTGTACAAAAAAGCAGGCTTGATGGATTACCCTTCAGGATCAGATCCATTT	GGGACCACTTTGTACAAGAAAGCTGGGTTTTGTCGGTATCTATATATTTTTCTAGTAT
ORF19.3774	PPG1	Protein phosphatase	CEC1429	AATGGCGCTGAAGGACTATC	GGGACAAGTTTGTACAAAAAAGCAGGCTtgATGACGGTGCCGTTCAAAATACCAATTTCC	GGGACCACTTTGTACAAGAAAGCTGGGTCAAGAAATACTCAACTTGTTGACGTTTAGG
ORF19.3794	CSR1	Transcription factor	CEC1429	CAGATAATCGACCATGTTCC	GGGACAAGTTTGTACAAAAAAGCAGGCTtgATGGAACCTATTTCTAATCAACCCAATTTC	GGGACCACTTTGTACAAGAAAGCTGGGTTTTCTCAACTGAATGTTCTAAAACGTGTCG
ORF19.3809	BAS1	Transcription factor	CEC1121	TCCAGTGGTATGAAGAGTTC	GGGACAAGTTTGTACAAAAAAGCAGGCTTGATGAGCTCGCCTCTGAATGAAGCTTCAGAC	GGGACCACTTTGTACAAGAAAGCTGGGTGGATGGGTTGAATGGAATCATTCCAAAACC
ORF19.3829	PHR1	Cell surface	CEC1429	CCGATAAGGGTAACTAACGC	GGGACAAGTTTGTACAAAAAAGCAGGCTtgATGTATTCATTAATCAAATCATTGGTTACA	GGGACCACTTTGTACAAGAAAGCTGGGTAAAAACAACGGACATACCACCAACAAATGC
ORF19.384		Other	CEC1429	TAGGATTGGCCCATTCCACG	GGGACAAGTTTGTACAAAAAAGCAGGCTtgATGGATTGGTATAATAACAGATCTAGACGA	GGGACCACTTTGTACAAGAAAGCTGGGTCAACGGGTAATCCTGGCATCTCATATCAAT
ORF19.3841		Protein kinase	CEC1429	CAGCACAGCGTAATTGATGC	GGGACAAGTTTGTACAAAAAAGCAGGCTtgATGATACCTCAGTCGAACCCTACAGCTCAA	GGGACCACTTTGTACAAGAAAGCTGGGTTTTCCCCATGAAATTCTTCAAACGGGAGTT
ORF19.3856	CDC28	Protein kinase	CEC1429	AGGCGACTCATCACTATTGG	GGGACAAGTTTGTACAAAAAAGCAGGCTtgATGGTAGAGTTATCTGATTATCAACGTCAA	GGGACCACTTTGTACAAGAAAGCTGGGTTTGCATGTTTTGGTGTTTGTCAATCCCAAT
ORF19.3865	RFX1	DNA damage and cell cycle regulators	CEC1121	CAACTACGTCTATACGGACT	GGGACAAGTTTGTACAAAAAAGCAGGCTTGATGAGCTCAGATCAGACACCTCAAAATCGA	GGGACCACTTTGTACAAGAAAGCTGGGTATTTAATAAATTATCAATATTTGTTTCAAA
ORF19.390	CDC42	Other	CEC1429	AACGACGATGAACAGGTGCC	GGGACAAGTTTGTACAAAAAAGCAGGCTtgATGCAAACTATAAAATGTGTTGTTGTCGGT	GGGACCACTTTGTACAAGAAAGCTGGGTTAAAATAGTACACTTTTTCGATTTTTTAAT
ORF19.3912	GLN3	Transcription factor	CEC1429	TTCGACGCCACAGGGATTTC	GGGACAAGTTTGTACAAAAAAGCAGGCTtgATGACTACATCGAATAGTCAGTCCAAACAA	GGGACCACTTTGTACAAGAAAGCTGGGTAATGTCAAACTTCAACCAATCCAAATCCTT
ORF19.3923	PGA37	Cell surface	CEC1429	GCCCAAGTACAATTTCGACA	GGGACAAGTTTGTACAAAAAAGCAGGCTtgATGCTATTTACTCAACTAATAATTTTACTT	GGGACCACTTTGTACAAGAAAGCTGGGTTAATACAATCGAGTATGCAGCAGCAAAACC
ORF19.3957		Other	CEC1429	GAGGCGACTTCATTGATACT	GGGACAAGTTTGTACAAAAAAGCAGGCTtgATGTCAAACCCATCACATAATCCAAAACAT	GGGACCACTTTGTACAAGAAAGCTGGGTATATGTTAAGACCTCTTCTCTGGTTTTTTG
ORF19.3969	SFL2	Transcription factor	CEC1429	GGCGCTTTATCAATCTAACC	GGGACAAGTTTGTACAAAAAAGCAGGCTtgATGAGTAAGAAAAATCCTGGTGATCCTCGT	GGGACCACTTTGTACAAGAAAGCTGGGTTTTATTCATATTATCAGTATCATCATCACT
ORF19.3978		DNA damage and cell cycle regulators	CEC1121	CTTCAAGATTGCGGAATGAG	GGGACAAGTTTGTACAAAAAAGCAGGCTTGATGCCCAAGACAGTAAAGAACCCCAAAAAT	GGGACCACTTTGTACAAGAAAGCTGGGTTTCAAAGAAATCATCTTGTTCTTCTTGTTG
ORF19.3986	PPR1	Transcription factor	CEC1429	CTTACAATGGGCTGCAAGGC	GGGACAAGTTTGTACAAAAAAGCAGGCTtgATGTCTGAATCACCATCACAACCACCACAA	GGGACCACTTTGTACAAGAAAGCTGGGTTTGTTTGTTGGCAAAAAATTCATCCCAAAT
ORF19.399		Protein kinase	CEC1429	GTGCCCTACGCCAAGAAATA	GGGACAAGTTTGTACAAAAAAGCAGGCTtgATGTTCAAGTTTAAAAACAAATTGAAATTT	GGGACCACTTTGTACAAGAAAGCTGGGTTAAAACATTGTCACCATTGTATGTCCACCC
ORF19.4000	GRF10	Transcription factor	CEC1429	AGAGCATCTGTCCTAACGTG	GGGACAAGTTTGTACAAAAAAGCAGGCTtgATGTCTCCTGACTCTATTTCATCACTGGTG	GGGACCACTTTGTACAAGAAAGCTGGGTATTTTCAAAATCAATAAAACTGTCTAAATT
ORF19.4002	DUN1	Protein kinase	CEC1121	GATACCGTAGCATTAGGTCG	GGGACAAGTTTGTACAAAAAAGCAGGCTTGATGTCATTGATCAGGAAAAGGGTATGTTGA	GGGACCACTTTGTACAAGAAAGCTGGGTAGTTTTGAAATTGATTTGTGATTCATGCTG
ORF19.4009	CNB1	Other	CEC1429	ATATCTTGACGAGCTGCCGG	GGGACAAGTTTGTACAAAAAAGCAGGCTtgATGGGGGCTAACGCAAGTATTCTTGATGGT	GGGACCACTTTGTACAAGAAAGCTGGGTGAACATATTTAATGTCAAAGTGTTGGCAAT
ORF19.4014		Protein phosphatase	CEC1429	ATAGGCACTTCACCAGCGTG	GGGACAAGTTTGTACAAAAAAGCAGGCTtgATGTTAAAGCTTAAAAGTACTCATTTTTTG	GGGACCACTTTGTACAAGAAAGCTGGGTATACAAAGTTAACACAAATCCTACGTAGTA
ORF19.4015	CAG1	Other	CEC1429	ACATGGCCTACATTGCATAG	GGGACAAGTTTGTACAAAAAAGCAGGCTtgATGGGTTGTGGCGCTAGTGTTCCAGTTGAT	GGGACCACTTTGTACAAGAAAGCTGGGTTATAATACCACTCTTTTTCAAGTTTTGTTG
ORF19.403	PCL2	Other	CEC1429	CGCGGTAATCTGATCTAACG	GGGACAAGTTTGTACAAAAAAGCAGGCTtgATGTCAGACAAAGAAGCTTTGAAAATATTC	GGGACCACTTTGTACAAGAAAGCTGGGTGTTTTTATACAATATTGTAGAATCTACTAT
ORF19.4056	GAT2	Transcription factor	CEC1429	GGCCTCATCTTCTGCAATAT	GGGACAAGTTTGTACAAAAAAGCAGGCTtgATGTCCAGTTCATCATCTTTATCTTCATCT	GGGACCACTTTGTACAAGAAAGCTGGGTATGACGAATTAAAGGAATTTGGGTTGGGTA
ORF19.4084	KIS1	Other	CEC1429	TACCGCGTTTGAATCGACGG	GGGACAAGTTTGTACAAAAAAGCAGGCTtgATGCTCAGTCCAAAATCTACAAATCAGGAG	GGGACCACTTTGTACAAGAAAGCTGGGTCAGTTGCTGCTCTTGTGTTGTGGAAGACAG
ORF19.4086		Protein phosphatase	CEC1429	CATACGACTATACGCATTCG	GGGACAAGTTTGTACAAAAAAGCAGGCTtgATGCAACAGGAAACTAACAACACACAATAT	GGGACCACTTTGTACAAGAAAGCTGGGTTATCCTAACAAAATCAGGCTTGTTAGCATC
ORF19.410.3	RIB4	Other	CEC1429	AAGGCTGATGAATGCTGATC	GGGACAAGTTTGTACAAAAAAGCAGGCTtgATGACTGAACCTGATAATCAAGAAAAACTC	GGGACCACTTTGTACAAGAAAGCTGGGTATTGAATTTAGTGGCCATTTCGACAGCAGC
ORF19.4105		DNA damage and cell cycle regulators	CEC1121	CATAGCTCACGATAGAGTCG	GGGACAAGTTTGTACAAAAAAGCAGGCTTGATGTCATATGTGATGGACGAAACAGAAGAA	GGGACCACTTTGTACAAGAAAGCTGGGTTGCGCCGTACTCTCTCATTAGTTCTAATTC
ORF19.4125	PZF1	Transcription factor	CEC1429	GCAGTCAAGCAATCTCCATA	GGGACAAGTTTGTACAAAAAAGCAGGCTtgATGAGTGAAAGTGACGAAACCAAATCGATA	GGGACCACTTTGTACAAGAAAGCTGGGTTCGAGAAATCACTGATGTTTCATTTGGCAA
ORF19.4127		Protein kinase	CEC1429	CTATGCTTCATCAGTCGAGT	GGGACAAGTTTGTACAAAAAAGCAGGCTtgATGGGTATTAATAATCCAATTCCAAGAAGC	GGGACCACTTTGTACAAGAAAGCTGGGTAATCAATTCAACATAGTTTGCTGGGAAAAT
ORF19.4145	ZCF20	Transcription factor	CEC1429	ACACTAGACTCATTGATCGG	GGGACAAGTTTGTACAAAAAAGCAGGCTtgATGGGTCCTATAGCTGTAAAAATGGAAAAC	GGGACCACTTTGTACAAGAAAGCTGGGTTCCTTGAAAGTAGTTTTCTATATTTCTACT
ORF19.4151	SPO1	DNA damage and cell cycle regulators	CEC1121	ACAGCTCCGCAATGTGAGTA	GGGACAAGTTTGTACAAAAAAGCAGGCTTGATGTTGTTCTTACTTCTAATAATACCATTG	GGGACCACTTTGTACAAGAAAGCTGGGTATTATCTCTCCAACAGAATGTTTTGTAACA
ORF19.4152	CEF3	Other	CEC1429	GCAGACCTATACATAAGCGC	GGGACAAGTTTGTACAAAAAAGCAGGCTtgATGTCTGCTGCTAGTGAATCCAAATATTCT	GGGACCACTTTGTACAAGAAAGCTGGGTGAATTCTTCATCAGATGAGACATAAGCATC
ORF19.4161		DNA damage and cell cycle regulators	CEC1121	AAGACATGCCTATACAGCCG	GGGACAAGTTTGTACAAAAAAGCAGGCTTGATGACGGATACACAACCAAGGAAAATACGT	GGGACCACTTTGTACAAGAAAGCTGGGTATCCGATGAATTCAGATCCCTTCTTTGAGA
ORF19.4162	MLH1	DNA damage and cell cycle regulators	CEC1121	ATAGCTGTGAAAGCGGCTCA	GGGACAAGTTTGTACAAAAAAGCAGGCTTGATGAGTGAACCCACTTGTACAATCAAAAGA	GGGACCACTTTGTACAAGAAAGCTGGGTACATCTTTCGAAAACTCTATATAATCCTGG
ORF19.4166	ZCF21	Transcription factor	CEC1429	CCGCTATTATTACAGACTGG	GGGACAAGTTTGTACAAAAAAGCAGGCTtgATGATGGATATTTATCAGAAGGCTCTCAAG	GGGACCACTTTGTACAAGAAAGCTGGGTAGTGATCAATTTGGAAATGGTAGGTACTTT
ORF19.4185		Other	CEC1429	TACTTAGGCGCATCAGTTGG	GGGACAAGTTTGTACAAAAAAGCAGGCTtgATGTCCAAAATTTATTCTTTATCTGATTTG	GGGACCACTTTGTACAAGAAAGCTGGGTGGATCCAAACTCCCATATTTCTTGGTCATA
ORF19.4192	CDC14	Protein phosphatase	CEC1429	TTGGGACCCTCCATACTAGG	GGGACAAGTTTGTACAAAAAAGCAGGCTtgATGCATAGTTCACTGGTTCATGTGCCTCTT	GGGACCACTTTGTACAAGAAAGCTGGGTCACCACCAGAGTGTGCTCTTGATGTTTGTG
ORF19.4208	RAD52	DNA damage and cell cycle regulators	CEC1121	ATTCCTGCCCGGATGGGTTT	GGGACAAGTTTGTACAAAAAAGCAGGCTTGATGAACTCTAGACCTGCACCTCCGCAACCA	GGGACCACTTTGTACAAGAAAGCTGGGTTTGGTTAACAGTCGTATTAGCTATTGTAGA
ORF19.4222	SST2	Other	CEC1429	CTATCGAGGATCACGGACTG	GGGACAAGTTTGTACAAAAAAGCAGGCTtgATGGATTCAATTATCACGATAAATATGCCA	GGGACCACTTTGTACAAGAAAGCTGGGTGAAAGTTGTAATTATCCTATTACTTGTTAC
ORF19.4225	LEU3	Transcription factor	CEC1429	TATGATCCTCTCGACAGGCG	GGGACAAGTTTGTACAAAAAAGCAGGCTtgATGAATAATAACGTCGCAAGTAGCCAGAAT	GGGACCACTTTGTACAAGAAAGCTGGGTACTTGTGTGAAAACCAAAATCGTTCATGAC
ORF19.4242	CST20	Protein kinase	CEC1429	AGTAGACCTTACAGCTCCTG	GGGACAAGTTTGTACAAAAAAGCAGGCTtgATGAGCATACTTTCAGAGAACAATCCTACA	GGGACCACTTTGTACAAGAAAGCTGGGTATCAGATTCACTCATTTTTTTCAATCGAGC
ORF19.4251	ZCF22	DNA damage and cell cycle regulators	CEC1121	TGCAATTATGGGCAAAGGCC	GGGACAAGTTTGTACAAAAAAGCAGGCTTGATGTATTGTGGATACTATATGTATCAAGAT	GGGACCACTTTGTACAAGAAAGCTGGGTAAAGGCGACACTTTCGAGGATTTCTCGATC
ORF19.4252		Other	CEC1429	ACATAGTGAGAACTTGGGAC	GGGACAAGTTTGTACAAAAAAGCAGGCTtgATGACAGATCACCTAATTGCTAAAGTACAA	GGGACCACTTTGTACAAGAAAGCTGGGTACCCAACATACTTCTTTTTCTTCCTCTTAA
ORF19.4255	ECM331/PST1	Cell surface	CEC1429	AGCATGGACTCAGCGTGACT	GGGACAAGTTTGTACAAAAAAGCAGGCTtgATGCAAATTAAGTCATTTCTTTTACCAATA	GGGACCACTTTGTACAAGAAAGCTGGGTAATTAATGCCAATAAAACACCCAAGGCTGT
ORF19.428		Protein kinase	CEC1429	TACCTGGACCGGATGACTGT	GGGACAAGTTTGTACAAAAAAGCAGGCTtgATGTCGATTATTCCTTACAATAATAACAAG	GGGACCACTTTGTACAAGAAAGCTGGGTAACTATATAAGGGTTCAGATGGCCCAACTC
ORF19.4295		Transcription factor	CEC1429	CTAGCAAAGACAGGGTTGTA	GGGACAAGTTTGTACAAAAAAGCAGGCTtgATGAAGTTTTTGAAATTACCTCAACTGTAT	GGGACCACTTTGTACAAGAAAGCTGGGTACTTTCATCTATCACAACACCAATTTTTTT
ORF19.4297	CKB2	Other	CEC1429	AACCTCCAGTCGGGTAAGTG	GGGACAAGTTTGTACAAAAAAGCAGGCTtgATGGCTAACGAGGAATATGTGACAGATTCG	GGGACCACTTTGTACAAGAAAGCTGGGTCTTTTGATTTGGCGAGAGACTCTTGAATTG
ORF19.4308	HSL1	Protein kinase	CEC1429	TTGAGATTCACCAGACCAGC	GGGACAAGTTTGTACAAAAAAGCAGGCTtgATGTCAACAGTTGTTAATAGACGGTCATCA	GGGACCACTTTGTACAAGAAAGCTGGGTCCTCCTGGAGATTTTATCTTGTTCTTCTTT
ORF19.4318	MIG1	Transcription factor	CEC1429	TGACCATAACGAGTAAGGGC	GGGACAAGTTTGTACAAAAAAGCAGGCTtgATGTCCATGTCCACACCTATGCCCACGCCC	GGGACCACTTTGTACAAGAAAGCTGGGTACTTAATAAATTGGTTAAACTCATTGGTTT
ORF19.4361	IFF3	Cell surface	CEC1429	CCATTGGACTAATACGTCAG	GGGACAAGTTTGTACAAAAAAGCAGGCTtgATGCAACTATTCCAGAATATTCTTGTTTCC	GGGACCACTTTGTACAAGAAAGCTGGGTCATAAACATCATCAATCCGAAAACTACCAA
ORF19.4367	SMC1	DNA damage and cell cycle regulators	CEC1121	ACCATAGTTGCAGATACCTG	GGGACAAGTTTGTACAAAAAAGCAGGCTTGATGGGTAGATTAATAGGATTAGAACTATTC	GGGACCACTTTGTACAAGAAAGCTGGGTTGTAGTGGCAGTGACAGTACTCAAAGGAAC
ORF19.4377	KRE1	Cell surface	CEC1429	CCCAGGAGTAAATCGCTAGA	GGGACAAGTTTGTACAAAAAAGCAGGCTtgATGAACGTTAACTCAGTCATATACTACATT	GGGACCACTTTGTACAAGAAAGCTGGGTTATTAATAAAATGAATGAAATGAATGCAAT
ORF19.4401	YVH1	Protein phosphatase	CEC1429	CCTCGCTGACGATGGGATAT	GGGACAAGTTTGTACAAAAAAGCAGGCTtgATGCTGGTAAAAAGAATTTTAGGAGGACTA	GGGACCACTTTGTACAAGAAAGCTGGGTATTACGAAGAGTGCTTTCTCTCTTTATATA
ORF19.4427	SKP1	Other	CEC1429	TCATAGGTCGTGACATGGAT	GGGACAAGTTTGTACAAAAAAGCAGGCTtgATGTCATCTCCTAAGGTTATTATTGTTTCT	GGGACCACTTTGTACAAGAAAGCTGGGTTCTATCTTCAGCCCATTCATTTTCTTTTCT
ORF19.4432	KSP1	Protein kinase	CEC1429	CAGGCGTCAGTAGTATTCAT	GGGACAAGTTTGTACAAAAAAGCAGGCTtgATGGAACAATTTGAACGATATGACAAGGGC	GGGACCACTTTGTACAAGAAAGCTGGGTATCATAATCACACCAATCTTTTCTAAATGA
ORF19.4433	CPH1	Transcription factor	CEC1429	AAGACGCCAGTCACTCGATG	GGGACAAGTTTGTACAAAAAAGCAGGCTtgATGTCAATTACTAAAACATACAATGGTGAT	GGGACCACTTTGTACAAGAAAGCTGGGTTGTTTGTGACTGTTTTACTTCTTCTTTATT
ORF19.4438	RME1	DNA damage and cell cycle regulators	CEC1121	GACATAGATCCAATCCGCTA	GGGACAAGTTTGTACAAAAAAGCAGGCTTGATGTTTTCTTATAATTTAGAGTCCAATAAT	GGGACCACTTTGTACAAGAAAGCTGGGTACCTTTCGATTTTTTAATTGCCTTGTCTTC
ORF19.4450	ZCF23	Transcription factor	CEC1429	GAGATGTCCTTAACGCTCCG	GGGACAAGTTTGTACAAAAAAGCAGGCTtgATGACTAAAAAGTTAACTCCACAAGAAAAG	GGGACCACTTTGTACAAGAAAGCTGGGTTACAATTGGCAAGAATTGGCCAATAACAAT
ORF19.4518		Protein kinase	CEC1429	GGGACATTCCTAATAACGCC	GGGACAAGTTTGTACAAAAAAGCAGGCTtgATGAATGGGATAGGATCATCTAAAGTTATT	GGGACCACTTTGTACAAGAAAGCTGGGTTACATTTTCTTCTTCCTCTTCATTGATAAC
ORF19.4534		Other	CEC1429	CTCATACAGACAGATGGACC	GGGACAAGTTTGTACAAAAAAGCAGGCTtgATGTCAGATAATATACATCGCTCATTTACC	GGGACCACTTTGTACAAGAAAGCTGGGTATCTCTTGAGTTTTCATCATCTCTTTCATT
ORF19.4537		DNA damage and cell cycle regulators	CEC1121	GCGCTAACATTACTCAAGAC	GGGACAAGTTTGTACAAAAAAGCAGGCTTGATGGATACAAAGGAAATAAGATCTACCGTA	GGGACCACTTTGTACAAGAAAGCTGGGTTGAAAACTTCCATCTATTGCCACAATTTTC
ORF19.454	SFL1	Transcription factor	CEC1429	TCCGAAGAAGCATGTGCAAC	GGGACAAGTTTGTACAAAAAAGCAGGCTtgATGAGTCATTTGGTACTGTCTTCACTTGGT	GGGACCACTTTGTACAAGAAAGCTGGGTTTCTAATTTTCTCTTTTTATGATCGTTCCC
ORF19.4549	FGR38	DNA damage and cell cycle regulators	CEC1121	TGTGCATCGCCACCGTTTAT	GGGACAAGTTTGTACAAAAAAGCAGGCTTGATGGTAATTGCAAGACCAGACGTTAACCTT	GGGACCACTTTGTACAAGAAAGCTGGGTACAGATTCTTCGTCTTTTATGATCTTCATC
ORF19.4560	BFR1	DNA damage and cell cycle regulators	CEC1121	CAACTTCTCGGGAATAGGAG	GGGACAAGTTTGTACAAAAAAGCAGGCTTGATGTCCTCCGTTAAATCTGCTACTACTTCC	GGGACCACTTTGTACAAGAAAGCTGGGTAGCATCAGTTGATTGTTCTTCAACTTTTTG
ORF19.4568	ZCF25	Transcription factor	CEC1429	TGTACCGGCATCACCTTTGG	GGGACAAGTTTGTACAAAAAAGCAGGCTtgATGGATATAGAAACCACTAAAGAAAGAAGA	GGGACCACTTTGTACAAGAAAGCTGGGTTTGCCCTGAATCACTTCTTCCTTCTAATAG
ORF19.4593	RGA2	Other	CEC1429	CTAGACCGTTAGATCCGTTT	GGGACAAGTTTGTACAAAAAAGCAGGCTtgATGCCTGAACTTGTGCCACCAACAAACAAT	GGGACCACTTTGTACAAGAAAGCTGGGTAAAGATTCTATGTGATTCTGTCAATAGTAA
ORF19.460	CEK2	Protein kinase	CEC1429	AAGAGTGACGTAACCTCCTC	GGGACAAGTTTGTACAAAAAAGCAGGCTtgATGAAGAAATCTACTGGCCCCACTCAAACT	GGGACCACTTTGTACAAGAAAGCTGGGTCGACATGACTATTTCGAAAATTTGTTTTTT
ORF19.4623.3	NHP6A	Transcription factor	CEC1429	CTCGCGGGAACAAGATGCAA	GGGACAAGTTTGTACAAAAAAGCAGGCTtgATGGCTCCAGGTGAAAGAAAGAAGTCCTCT	GGGACCACTTTGTACAAGAAAGCTGGGTGGCGGAATTCTTTTTAGCGTATTCAGCCTT
ORF19.4645	BEM1	Protein kinase	CEC1429	GCGAGTCATACATATCTTGC	GGGACAAGTTTGTACAAAAAAGCAGGCTtgATGATTAAGACGTTTCGGAAAAGTAAAAGA	GGGACCACTTTGTACAAGAAAGCTGGGTATATACTAAAACCATTAATTTACATTTATC
ORF19.4649	ZCF27	Transcription factor	CEC1429	ATGTAGACGCCATCGCATCG	GGGACAAGTTTGTACAAAAAAGCAGGCTtgATGAGTACACCGGTGAAAAATGATTCCATA	GGGACCACTTTGTACAAGAAAGCTGGGTTTGTGTTTGAGTTGAAAACTGTTGTTGTTG
ORF19.4651	PGA53	Cell surface	CEC1429	ATGTACGCCTGCACTTGGCT	GGGACAAGTTTGTACAAAAAAGCAGGCTtgATGAAATTCCAATTATTAACTTTAGTTTCA	GGGACCACTTTGTACAAGAAAGCTGGGTCAATAATAAAGCTAAAGCGGCCAAGATTGG
ORF19.4662	RLM1	Transcription factor	CEC1429	GATTGAGCCGCATCACTTCG	GGGACAAGTTTGTACAAAAAAGCAGGCTtgATGGGTAGAAGAAAGATTGAAATAGAACCA	GGGACCACTTTGTACAAGAAAGCTGGGTTGTATTTTTATTAGGTCCATTGTTGGTGTT
ORF19.4670	CAS5	Transcription factor	CEC1429	TTACGACCAGAACGGGACAC	GGGACAAGTTTGTACAAAAAAGCAGGCTtgATGGAGAATTATTTATTAAGTTCGCCGACA	GGGACCACTTTGTACAAGAAAGCTGGGTGGAAACTTCTTTGTTTTCATTCAACACTCT
ORF19.4689	PGA57	Cell surface	CEC1429	CCTGAGGTTGCAGTGTCTCT	GGGACAAGTTTGTACAAAAAAGCAGGCTtgATGCTATTTACTCAACTAATAATTTTATTT	GGGACCACTTTGTACAAGAAAGCTGGGTTAATACAATTGAATATGCAGCAGCTAAACC
ORF19.4722	RTG1	Transcription factor	CEC1429	GCAGTCACGCTAAGTCTTTC	GGGACAAGTTTGTACAAAAAAGCAGGCTtgATGTCTCAATTCGGAGAGTTTTATGATACA	GGGACCACTTTGTACAAGAAAGCTGGGTTCCACTCGTACTTCCCCGTCTACCTGATTT
ORF19.4725	SWI6	Transcription factor	CEC1429	CCTACACGAGTACCATTAAG	GGGACAAGTTTGTACAAAAAAGCAGGCTtgATGGATTCTCCTATACACATTGGTGACTTG	GGGACCACTTTGTACAAGAAAGCTGGGTCTGTTGTCCTTCCACTGCTTCCAACAACCC
ORF19.4752	MSN4	Transcription factor	CEC1429	CAATCGCAGGTCAGATGATG	GGGACAAGTTTGTACAAAAAAGCAGGCTtgATGTCTCAAGAATTCCAACCTTTATTTGAA	GGGACCACTTTGTACAAGAAAGCTGGGTTACCGATTTTTTCTTTTCTTTTCTTCCATG
ORF19.4765	PGA6	Cell surface	CEC1429	ACACGGATCACATCGTAGTC	GGGACAAGTTTGTACAAAAAAGCAGGCTtgATGCAATTCCAAACTTTATTAGTCGTCGCT	GGGACCACTTTGTACAAGAAAGCTGGGTTAATAAGATAGCGGCTAAACCAGCAATAGC
ORF19.4766	ARG81	Transcription factor	CEC1429	ACCTGAGCAGTATAGACGCG	GGGACAAGTTTGTACAAAAAAGCAGGCTtgATGTCATCACCATCTATACTATCCAAAAAT	GGGACCACTTTGTACAAGAAAGCTGGGTTGCTAACATTAAATTCATTTCCCAATCATG
ORF19.4767	ZCF28	Transcription factor	CEC1429	AATCACGCTTGGTAAGTTGG	GGGACAAGTTTGTACAAAAAAGCAGGCTtgATGAATCAAGATTCAACGACTTTGAATTTC	GGGACCACTTTGTACAAGAAAGCTGGGTATTTATTCCTTCACGACCAAATCGTTTACC
ORF19.4775	CTA8	Transcription factor	CEC1429	GACTGCTGCTCATATCGAGT	GGGACAAGTTTGTACAAAAAAGCAGGCTtgATGATTATGAATATGACTACTGATTATAGA	GGGACCACTTTGTACAAGAAAGCTGGGTATGATCGCTAACTTCTTCGATTGATCTTTT
ORF19.4776	LYS143	Transcription factor	CEC1429	ATCTCTCATGGTGGGTAAGT	GGGACAAGTTTGTACAAAAAAGCAGGCTtgATGGCGTCAAATATTTCACAAGATAGATCA	GGGACCACTTTGTACAAGAAAGCTGGGTGTATGATAACAAATCCTCGTTCTCGTTGTC
ORF19.4778	LYS142	Transcription factor	CEC1429	TATGATCTCTGCCAACTTGC	GGGACAAGTTTGTACAAAAAAGCAGGCTtgATGTCTACTTCCAAGAGAGCTTATAGTCGA	GGGACCACTTTGTACAAGAAAGCTGGGTGTAGGCAACATTATCGATATGAATTCCGTC
ORF19.4785	PTC1	Protein phosphatase	CEC1429	ATATAGCGGCCTAAGCTGAG	GGGACAAGTTTGTACAAAAAAGCAGGCTtgATGGCATCAACAGATACAAACAACTCAAAA	GGGACCACTTTGTACAAGAAAGCTGGGTACTGAACACGTCATTGTCAAGCTGTACAAC
ORF19.4796		Other	CEC1429	CCTGACTGGCAATATCGTTA	GGGACAAGTTTGTACAAAAAAGCAGGCTtgATGGCCAAATACACTGAAGAACAATTACTT	GGGACCACTTTGTACAAGAAAGCTGGGTTTCATCATCTTCGTCATCATCATCTTCATC
ORF19.4799	CEF1	Transcription factor	CEC1429	CCCTACTCAGTGGCATATTG	GGGACAAGTTTGTACAAAAAAGCAGGCTtgATGGCACCACCACTATATGTCAAAGGGGGT	GGGACCACTTTGTACAAGAAAGCTGGGTCCGAAGTGTTTCAATCTTTTTGTTTAATTT
ORF19.4853	HCM1	Transcription factor	CEC1429	AGTATCGCAGTCTACGAGAT	GGGACAAGTTTGTACAAAAAAGCAGGCTtgATGTCTTCTGTCATGGATAAACCTACATCA	GGGACCACTTTGTACAAGAAAGCTGGGTGTCCTTTAATGTACTATTCTTCTCCACATT
ORF19.4866	CPP1	Protein phosphatase	CEC1429	AGGATTAGCCCATCTACACG	GGGACAAGTTTGTACAAAAAAGCAGGCTtgATGACTACACCACTATCGAGTTATTCAACT	GGGACCACTTTGTACAAGAAAGCTGGGTTAAATTAATAGTAGGTGGACTATTCATTAA
ORF19.4867	SWE1	Protein kinase	CEC1121	TATGTCACTGGCCCGAACGT	GGGACAAGTTTGTACAAAAAAGCAGGCTTGATGGATTCAAACCCGTGTCAAGACGTATCG	GGGACCACTTTGTACAAGAAAGCTGGGTTTCATCAGGTGGACTACCAAATTCTCCTTC
ORF19.4869	SFU1	Transcription factor	CEC1429	TAACTCCTGCGACTGAGGGT	GGGACAAGTTTGTACAAAAAAGCAGGCTtgATGCCTACCTCACCTACAGAATCAATACCC	GGGACCACTTTGTACAAGAAAGCTGGGTTCCATTTAACAACTTCCCAATAGAAAGTGC
ORF19.487	SPT14	Transcription factor	CEC1429	CCCGAACCAGGATCATTAAG	GGGACAAGTTTGTACAAAAAAGCAGGCTtgATGGGATACAATATAGCAATGGTAACAGAT	GGGACCACTTTGTACAAGAAAGCTGGGTATTTACTTTGTTCGGAAAAATAAATGTTTC
ORF19.4890	CLA4	Protein kinase	CEC1429	CTGCGTGAGATCGGCCTATT	GGGACAAGTTTGTACAAAAAAGCAGGCTtgATGACAAGTATTTATACATCAGATTTGAAA	GGGACCACTTTGTACAAGAAAGCTGGGTTGCAAACCCTGTATCCAGTGTTTCTTGTTT
ORF19.4909	CBK1	Protein kinase	CEC1429	TATGACTTGACACACGGCGC	GGGACAAGTTTGTACAAAAAAGCAGGCTtgATGAATTTCGATCAGCTTACAGACGAGCAG	GGGACCACTTTGTACAAGAAAGCTGGGTTAACGCATTCTTTCTTGTCAAATAATCAAA
ORF19.4910	FGR41/PGA35	Cell surface	CEC1429	TCGGCCCACAGGCATAAAGA	GGGACAAGTTTGTACAAAAAAGCAGGCTtgATGAAGATTTCCAACTTAATTCCAGCTTAT	GGGACCACTTTGTACAAGAAAGCTGGGTATTGAGAGTGACAGTTGTAGTGATTGTTGA
ORF19.4941	TYE7	Transcription factor	CEC1429	GCGCCCGCACAATTTAGAAA	GGGACAAGTTTGTACAAAAAAGCAGGCTtgATGAGTTCATTCCAGCAAGAAAATCAATTG	GGGACCACTTTGTACAAGAAAGCTGGGTTATTTCACCACCCAATTTAATAACTTGTTC
ORF19.4969	KEM1	Other	CEC1429	CCGACCACGCAATTATTTGA	GGGACAAGTTTGTACAAAAAAGCAGGCTtgATGGCTATTGATGGGGTTGCTCCTCGAGCT	GGGACCACTTTGTACAAGAAAGCTGGGTTGATTCTTGTTTGACCTTATCTTTAGGTTG
ORF19.4979	KNS1	Protein kinase	CEC1429	CACACGGCATGGGATTAACG	GGGACAAGTTTGTACAAAAAAGCAGGCTtgATGATTAGTAATAGAAAGAGACCAAGAGTT	GGGACCACTTTGTACAAGAAAGCTGGGTCACAATTCCTTCATCTATAGTACCTAAATC
ORF19.5008.1	DAD1	Other	CEC1121	TGAGAGGACTCCACGACATC	GGGACAAGTTTGTACAAAAAAGCAGGCTTGATGTCAAATTCTTCATCTAATCCATCTAAA	GGGACCACTTTGTACAAGAAAGCTGGGTTATCTTGTTGTTGTTGTTTTCATCTTCTGT
ORF19.5026		Transcription factor	CEC1429	AAGATGGCCCAATGTGTTGA	GGGACAAGTTTGTACAAAAAAGCAGGCTtgATGAATATGCAACCATCAGTTTCAGTAAAC	GGGACCACTTTGTACAAGAAAGCTGGGTTTTTTCAATGTATTTTGCTCTACTCTTTAA
ORF19.5031	SSK1	Other	CEC1429	ACAGGCATCTTGACTAAGTG	GGGACAAGTTTGTACAAAAAAGCAGGCTtgATGAATTTTCTCTATAACAATTCAGATTAT	GGGACCACTTTGTACAAGAAAGCTGGGTAGCTTTGTTTAATCTTCGATTCTTATCTTT
ORF19.5032	SIM1	Other	CEC1429	GACTGACGTGCATTCTGTTG	GGGACAAGTTTGTACAAAAAAGCAGGCTtgATGAAATATTTAACTTTATTAACAGTCTTA	GGGACCACTTTGTACAAGAAAGCTGGGTGTAGAAAACAAATTTAGCAGAACCGGAATT
ORF19.5045	PTP2	Protein phosphatase	CEC1429	AAGCAGCTCGAACTGATCGC	GGGACAAGTTTGTACAAAAAAGCAGGCTtgATGTCAACTGTTGAAAATTCTAATACTACA	GGGACCACTTTGTACAAGAAAGCTGGGTTACTTGATTCTGTTGATAATCTTTTTCATG
ORF19.505	SRV2	Other	CEC1429	CCCGGCTAGAAATATCTGAA	GGGACAAGTTTGTACAAAAAAGCAGGCTtgATGTCAACCGAGGAGAGTCAATTCAATGTT	GGGACCACTTTGTACAAGAAAGCTGGGTTCCAGCATGTTCAACAATTTGAGTGACTAA
ORF19.5102	PLB5	Cell surface	CEC1429	CGCCTAGTGAAATATGTCCA	GGGACAAGTTTGTACAAAAAAGCAGGCTtgATGAAGGTTAATTTGAAACTAATAATAGGG	GGGACCACTTTGTACAAGAAAGCTGGGTCAAATACGCTATAATTAATCCTAGCAAACT
ORF19.5104	LTP1	Protein phosphatase	CEC1429	GGATACGATCTACGCACACG	GGGACAAGTTTGTACAAAAAAGCAGGCTtgATGGCTCCTAAATTTGATCCTAAAGAGAAG	GGGACCACTTTGTACAAGAAAGCTGGGTATCTAAACTACCTATTTCTTGTTTCAAAAA
ORF19.513		Transcription factor	CEC1121	ATTGCTTCCAGCGTGGCACT	GGGACAAGTTTGTACAAAAAAGCAGGCTTGATGACTAACCTCTCCTTCCATAGGAAACAA	GGGACCACTTTGTACAAGAAAGCTGGGTAGCTGTCATTACATCAGAAGGTGTCACATA
ORF19.5144	PGA28	Cell surface	CEC1429	CCAGGACACTAAGGTAATGC	GGGACAAGTTTGTACAAAAAAGCAGGCTtgATGAAATTTTTTGCTTATTTTGCAGTTATT	GGGACCACTTTGTACAAGAAAGCTGGGTAATCAATAAAGCAGCAAACAAGCCCAACAA
ORF19.5148	CYR1	Other	CEC1429	ATCGAGATCCGAGTACACCG	GGGACAAGTTTGTACAAAAAAGCAGGCTtgATGAGTTTTTTAAGGAGAGATAAATCTAAA	GGGACCACTTTGTACAAGAAAGCTGGGTTTTAAGTTCATTAACTGTTTTCATGATGTC
ORF19.5156		Protein phosphatase	CEC1429	ACGAGAGGCGTATCACGTCT	GGGACAAGTTTGTACAAAAAAGCAGGCTtgATGTCACAACCAAATAAGTGGTTAATTGCT	GGGACCACTTTGTACAAGAAAGCTGGGTCTGGTTCTTTTTGTTTAATACTTTCTTTCT
ORF19.5157		Protein phosphatase	CEC1429	CAAGGCTTCGCAAGATGCAC	GGGACAAGTTTGTACAAAAAAGCAGGCTtgATGAAGGGGTACCTTATCTTGTATAATAGT	GGGACCACTTTGTACAAGAAAGCTGGGTCTCCGCTTTAATTTTTTTCAACACTTTAGT
ORF19.5160		Other	CEC1429	TCCAGGGCAGTACATGGTTC	GGGACAAGTTTGTACAAAAAAGCAGGCTtgATGTCAGGGTCATTTTGGAAATTCAGTAAT	GGGACCACTTTGTACAAGAAAGCTGGGTACCTTTACTTGCTGATCTTGTAAGCTTTGT
ORF19.5175		Transcription factor	CEC1429	GCTCGCTAGATTGAGAGAAT	GGGACAAGTTTGTACAAAAAAGCAGGCTtgATGTCATCAACAGATCACACATGTCGTATT	GGGACCACTTTGTACAAGAAAGCTGGGTATCATCATCTTCAACATTTTCAATTGCTCT
ORF19.5184		Other	CEC1429	CCAGGATCGCAAGATACTGA	GGGACAAGTTTGTACAAAAAAGCAGGCTtgATGGTGGCATTGAAAAGAGAGGCAGAGCCT	GGGACCACTTTGTACAAGAAAGCTGGGTTTCTAAATCTTCATACTTATCAAGTCTAAC
ORF19.5188	CHS1	Cell surface	CEC1429	GCCTGTATGAAAGCACACCA	GGGACAAGTTTGTACAAAAAAGCAGGCTtgATGAAGAATCCATTTGACAGTGGCAGTGAC	GGGACCACTTTGTACAAGAAAGCTGGGTATTTAATGGATTGTGACTCGGCGCGGTATA
ORF19.5200	SIT4	Protein phosphatase	CEC1429	GCACTTACGGCAATACCTTA	GGGACAAGTTTGTACAAAAAAGCAGGCTtgATGGGAGAAAGAGGTCCAGATCAGTGGTTG	GGGACCACTTTGTACAAGAAAGCTGGGTCAAAAAATAATCACTTCTTTGTTGTTTGTT
ORF19.5219	IRA2	Other	CEC1429	AGACGTATAACATGCTGCCC	GGGACAAGTTTGTACAAAAAAGCAGGCTtgATGAGTGATTCCATAATGAAAGATGACCAT	GGGACCACTTTGTACAAGAAAGCTGGGTATCCTCCAATTTCGACCCACTGATGTAACT
ORF19.5224	PKH2	Protein kinase	CEC1429	TGACCACCACTACTTTGAAG	GGGACAAGTTTGTACAAAAAAGCAGGCTtgATGCATAAATTTAGATATTCTTTGCACCAA	GGGACCACTTTGTACAAGAAAGCTGGGTTATTTCATTATATTTAGATTTAGCTAATGC
ORF19.5241	SNT1	Transcription factor	CEC1429	GCTCCCACAGTAAGTTAAAC	GGGACAAGTTTGTACAAAAAAGCAGGCTtgATGTCATCCTCAAATTCATCTGGTGGAGGA	GGGACCACTTTGTACAAGAAAGCTGGGTATTTAACAAACTCATGATTGACATTTTCGA
ORF19.5247		Protein phosphatase	CEC1429	CGCAGATTGAGCAACTTCTA	GGGACAAGTTTGTACAAAAAAGCAGGCTtgATGCTTGTACCACCAGAGAACTTTGGGACG	GGGACCACTTTGTACAAGAAAGCTGGGTGTATTTTTCTTCACTATTCAACCTTTGGAA
ORF19.5257	LCB4	Other	CEC1429	AGCAGCATGTGTTACAACCC	GGGACAAGTTTGTACAAAAAAGCAGGCTtgATGTCTTCCTCTTCTTCTACCCCTCAAGCA	GGGACCACTTTGTACAAGAAAGCTGGGTTTTGGTAAATGATGTTTCTACAAAGTTCCC
ORF19.5265	KIP4	DNA damage and cell cycle regulators	CEC1121	GCCAGCTCCAAAGTATGCAA	GGGACAAGTTTGTACAAAAAAGCAGGCTTGATGTCTAGTGTACATTCAAAATCATTTGAT	GGGACCACTTTGTACAAGAAAGCTGGGTGAAAATCCCCAATGAAGCAGCTGATTTCAA
ORF19.5276		DNA damage and cell cycle regulators	CEC1121	TATGGGTCAACACATCCCTA	GGGACAAGTTTGTACAAAAAAGCAGGCTTGATGAGTGTGGTTCAGTTTATTAATGAAATC	GGGACCACTTTGTACAAGAAAGCTGGGTAACCCATTGATTTGAATTACCATTATTATT
ORF19.5303	PGA30	Cell surface	CEC1429	GCATTGCAGGTCCTACAGTT	GGGACAAGTTTGTACAAAAAAGCAGGCTtgATGAAGTACTTTACAATTGCAACTGTATTA	GGGACCACTTTGTACAAGAAAGCTGGGTGATAACTAAACCAATAGCAGCAGCAGCAAG
ORF19.5305	RHD3/PGA29	Cell surface	CEC1429	GGACACTATACAGCATTCTC	GGGACAAGTTTGTACAAAAAAGCAGGCTtgATGAAATTCCTTGCTATTTTATCCTTGTCT	GGGACCACTTTGTACAAGAAAGCTGGGTCATGACTAATCCAGCAACAACAGCAGCCAT
ORF19.532	RBR2/PGA21	Cell surface	CEC1429	ATCGCATGTGCAGCATCTCG	GGGACAAGTTTGTACAAAAAAGCAGGCTtgATGAGATTCGCTTTCACAACTGTATCATTA	GGGACCACTTTGTACAAGAAAGCTGGGTCATTAAAGCAACTGCCAAAGCACCAACAAC
ORF19.5326		Transcription factor	CEC1429	TATCATTCGCCACGATGCGG	GGGACAAGTTTGTACAAAAAAGCAGGCTtgATGAGCATAGTAGACCAACAAAAACCTAAA	GGGACCACTTTGTACAAGAAAGCTGGGTTTTATTAAATTCAGGTAAGTTTAAACTTTT
ORF19.5334		Transcription factor	CEC1429	CAATGTATGACAACGGCGGA	GGGACAAGTTTGTACAAAAAAGCAGGCTtgATGATGTCGACACTTAAAGATAGTAAACAC	GGGACCACTTTGTACAAGAAAGCTGGGTATCGCCGTGTTTGAAACAGCATCTATTACC
ORF19.5335	SGS1	DNA damage and cell cycle regulators	CEC1121	TTGCACGCTACATGACGCAG	GGGACAAGTTTGTACAAAAAAGCAGGCTTGATGATAAATAATTTGCAAGAACAAGTGGCT	GGGACCACTTTGTACAAGAAAGCTGGGTCATAGGCATTACATTTCTATGAGAGTTTGC
ORF19.5338	GAL4	Transcription factor	CEC1429	CCTCAGTAGAAAGCTGGACA	GGGACAAGTTTGTACAAAAAAGCAGGCTtgATGTCTGAAACTAATGAAATCAAATTGGAA	GGGACCACTTTGTACAAGAAAGCTGGGTAACGTTAACAGTTTCATCGACCACACCTTC
ORF19.5343	ASH1	Transcription factor	CEC1429	TCACTCGGTGCATGAGGACT	GGGACAAGTTTGTACAAAAAAGCAGGCTtgATGAGTTTAGTCCAGTCAGCCATGTTTAAT	GGGACCACTTTGTACAAGAAAGCTGGGTAGATTTAGGAAGTACTTCAACTCTCCAGCC
ORF19.535	RBR1/PGA20	Cell surface	CEC1429	GCCGCGTATAAATCTTTCCA	GGGACAAGTTTGTACAAAAAAGCAGGCTtgATGAAATTCTCCACCACTTTATTAGCTTTA	GGGACCACTTTGTACAAGAAAGCTGGGTCAACAACAAAAGACCAGCAATGGCTGCCAA
ORF19.5350		Other	CEC1429	TGTTAAGAACGACGTGCCAC	GGGACAAGTTTGTACAAAAAAGCAGGCTtgATGGATTCGTTCGATGCTGCTAACCAATTG	GGGACCACTTTGTACAAGAAAGCTGGGTGTACTTGTCTTTATAGCTATTTTCCACAAT
ORF19.5357	AKL1	Protein kinase	CEC1429	ACACAGTTGTACGAATCTCC	GGGACAAGTTTGTACAAAAAAGCAGGCTtgATGGGTCATCTTCCAAAACTTCCAGAGGGC	GGGACCACTTTGTACAAGAAAGCTGGGTATTACCACCGAAAAACGATAGCCGCTTTTT
ORF19.536		Transcription factor	CEC1429	CACCTGCGTAGATTCTGGGT	GGGACAAGTTTGTACAAAAAAGCAGGCTtgATGGTGGATGAAAGTAAGCAATTGCAAGGT	GGGACCACTTTGTACAAGAAAGCTGGGTTCCTTGGAAGGCACCAGCTGCAAGACATAA
ORF19.5376		Protein kinase	CEC1429	AACGAGATAGTGACGTACTG	GGGACAAGTTTGTACAAAAAAGCAGGCTtgATGGATACAAATAAATTAGCAATTGTACTA	GGGACCACTTTGTACAAGAAAGCTGGGTATCTAACCCATCTAAGTAACTACTCATATC
ORF19.5377	HOS2	DNA damage and cell cycle regulators	CEC1121	GCGCTAGTAAGCAATGAGTA	GGGACAAGTTTGTACAAAAAAGCAGGCTTGATGACGATACTGATAAGTGAAACAGATACG	GGGACCACTTTGTACAAGAAAGCTGGGTAGTCATTAGTTCTCCTAGTTTGGTTTCATC
ORF19.5380	LYS144	Transcription factor	CEC1429	GTTTGCCATCAACACCAAGA	GGGACAAGTTTGTACAAAAAAGCAGGCTtgATGGGTTCATCTAGCCCAAACCCCACAAAA	GGGACCACTTTGTACAAGAAAGCTGGGTTGAAAATGGTATAATTTCCGAATCAAATGC
ORF19.5389	FKH2	Transcription factor	CEC1429	CGCCTAATACGTTGGAAATC	GGGACAAGTTTGTACAAAAAAGCAGGCTtgATGTCAGCACAATTTATCACACCGAAAAAG	GGGACCACTTTGTACAAGAAAGCTGGGTTTTAAAATACATACCTGTGCCTTTAGCCAT
ORF19.5408	HRK1	Protein kinase	CEC1429	TGTATCAACAGGGTGGAAAC	GGGACAAGTTTGTACAAAAAAGCAGGCTtgATGCCAGATAAACATAAACTCAAACTATTT	GGGACCACTTTGTACAAGAAAGCTGGGTACCTTCTTTCACAATTGTATGCTCGTGTGG
ORF19.5423	EST3	DNA damage and cell cycle regulators	CEC1121	GCGCAGGTAAGAATACTCTA	GGGACAAGTTTGTACAAAAAAGCAGGCTTGATGTTTAGATCGGTTTCACTTTCATCACTT	GGGACCACTTTGTACAAGAAAGCTGGGTTATGTCACACATCAAATCCTCATATTCTGG
ORF19.5438		Transcription factor	CEC1429	AGATTCCTGAAAGCCCTGCA	GGGACAAGTTTGTACAAAAAAGCAGGCTtgATGTCAACTCCCAATGTAACCAACATCTCT	GGGACCACTTTGTACAAGAAAGCTGGGTTTTGGGTGGCAAATCGGGTTTATCTATTTT
ORF19.5501	YAF9	Transcription factor	CEC1429	CCCGGTGTTAAATAGCTTGA	GGGACAAGTTTGTACAAAAAAGCAGGCTtgATGTCATCAACTCATTCAAGAAGAATAAAA	GGGACCACTTTGTACAAGAAAGCTGGGTTTGTAGGAGGGCTAATTTTTCTTGTTCGAG
ORF19.5537	WSC2	Other	CEC1429	ATACCGGACAGCAGCTACAG	GGGACAAGTTTGTACAAAAAAGCAGGCTtgATGTACCAAAGTTCGGGATACTGTGAACAA	GGGACCACTTTGTACAAGAAAGCTGGGTATTATTGACCACTTTCAAAGATCCAGGATT
ORF19.5548	LYS14	Transcription factor	CEC1429	GACATAGTCACAGAGTCCGC	GGGACAAGTTTGTACAAAAAAGCAGGCTtgATGTCACAATCACCATCTTCTTTATCACCT	GGGACCACTTTGTACAAGAAAGCTGGGTGTATATCAATGTATCATCATTTTCAATATC
ORF19.5551	MIF2	DNA damage and cell cycle regulators	CEC1121	GTGGGTCCTCAAACACACAA	GGGACAAGTTTGTACAAAAAAGCAGGCTTGATGTATTTATCCAACCTTGGTGGACAATCT	GGGACCACTTTGTACAAGAAAGCTGGGTCCAATTGGTATCGATTTCTTCTGGTTTTCT
ORF19.5636	RBT5	Cell surface	CEC1429	TCATCGGCTGCATCGCGTAT	GGGACAAGTTTGTACAAAAAAGCAGGCTtgATGCTCGCCTTATCCTTATTGTCAATCGTT	GGGACCACTTTGTACAAGAAAGCTGGGTGAATAAGGCAGCAACAGCGGCAATGACACC
ORF19.5651		Transcription factor	CEC1429	TATTGCGTGACACCTGCTCG	GGGACAAGTTTGTACAAAAAAGCAGGCTtgATGCTGTTTGATAAGAGGTTATTAACTCCA	GGGACCACTTTGTACAAGAAAGCTGGGTTACAAGATTCATTTTGGTTTCTTCAATCAA
ORF19.5660		Transcription factor	CEC1429	GATAGCATCCGAGACAGCTC	GGGACAAGTTTGTACAAAAAAGCAGGCTtgATGCAAGGACGAAACTATTCTTTACTAGGT	GGGACCACTTTGTACAAGAAAGCTGGGTCTTTAAGGGCAATAAATGTTGTTCCAAACA
ORF19.5661	PTC7	Other	CEC1429	TTCACCTAGAGCAGGAGCAG	GGGACAAGTTTGTACAAAAAAGCAGGCTtgATGTCGATGTTATTAACAATTCTCTCCAAG	GGGACCACTTTGTACAAGAAAGCTGGGTTTTAACCTTTACCAACACAACCGTTATATC
ORF19.5676		Transcription factor	CEC1429	GGGCCGAATACGAACCTAAC	GGGACAAGTTTGTACAAAAAAGCAGGCTtgATGGCAAACTCGACAAGTAATCCTGCTATC	GGGACCACTTTGTACAAGAAAGCTGGGTTGACGACAACAAAACTAACTTCTTTTTCTT
ORF19.5698		DNA damage and cell cycle regulators	CEC1121	CTCCCGACTAAAGAGAGGCA	GGGACAAGTTTGTACAAAAAAGCAGGCTTGATGTTCAAGTATATCCCTGCCAGGTCTATC	GGGACCACTTTGTACAAGAAAGCTGGGTTTTAAAGTCTATGACGAGGCCTGGACTGTT
ORF19.5722		Transcription factor	CEC1429	CAGAAGGCTCAATTTCCGTA	GGGACAAGTTTGTACAAAAAAGCAGGCTtgATGAAAGAAAATCAACATGAGAGTGGAGCA	GGGACCACTTTGTACAAGAAAGCTGGGTTTTATCTTGATTAATGCCTTTCATTCTGTT
ORF19.5729	FGR17	Transcription factor	CEC1429	TAGGCACATGGCTTACCAGG	GGGACAAGTTTGTACAAAAAAGCAGGCTtgATGCTGTCAAAATCTAGATCTTACGTTTCA	GGGACCACTTTGTACAAGAAAGCTGGGTTAACATATCAAGTATGCCTTCTTCTAAATA
ORF19.5734	POP2	Other	CEC1429	CTCTACTTAGGTGTAATGGG	GGGACAAGTTTGTACAAAAAAGCAGGCTtgATGAATGTTAACCCACATCTTCAATATTTA	GGGACCACTTTGTACAAGAAAGCTGGGTCACTCTACCACCAAAATGAACCATACCACT
ORF19.5736	ALS5/ALA1	Cell surface	CEC1429	AGCGCGACGTTGATCCAGAT	GGGACAAGTTTGTACAAAAAAGCAGGCTtgATGATTCAACAATTTACATTGTTATTCCTA	GGGACCACTTTGTACAAGAAAGCTGGGTTAGAAAGAAGAATAATGCAACGCTAATAAA
ORF19.5742	ALS9/ALS11	Cell surface	CEC1429	TGAGTTCGTACACCTCGTCG	GGGACAAGTTTGTACAAAAAAGCAGGCTtgATGCTTCCACAATTCATATTGTTATTCATA	GGGACCACTTTGTACAAGAAAGCTGGGTAATAAACAAAAAGAATATTGTGACCAATCC
ORF19.5758	SAL6	Protein phosphatase	CEC1429	GCTAATCGAACACAGCTCTA	GGGACAAGTTTGTACAAAAAAGCAGGCTtgATGGGAAATAGCCCGTCTAAAGATGATCCC	GGGACCACTTTGTACAAGAAAGCTGGGTATTTGGTTTAATCAATTCAAATGAACAATA
ORF19.5760	IHD1/PGA36	Cell surface	CEC1429	AGATCCTCGCACACTATTTG	GGGACAAGTTTGTACAAAAAAGCAGGCTtgATGAGACCAACTCCATTATTCTTTGCACTT	GGGACCACTTTGTACAAGAAAGCTGGGTTAATAAGTTCAATGCCAAAGCAACTAAAGA
ORF19.5762	PGA61	Cell surface	CEC1429	CCGGATTCGATACTTACGTT	GGGACAAGTTTGTACAAAAAAGCAGGCTtgATGAAATCTGGTTTACTACTTGCTGTGATT	GGGACCACTTTGTACAAGAAAGCTGGGTAATAAAGTTCAATAACAATGCAAGCAATGA
ORF19.5764	SKI8	DNA damage and cell cycle regulators	CEC1121	CGCCGAATTACCAATGATGA	GGGACAAGTTTGTACAAAAAAGCAGGCTTGATGGGTAAACAGTATATATCTACCGTCAGT	GGGACCACTTTGTACAAGAAAGCTGGGTTATTCCTCCTGCCTCTCGGTACCATCTTAT
ORF19.5844		DNA damage and cell cycle regulators	CEC1121	CGGCGGTAACGATTATTAAG	GGGACAAGTTTGTACAAAAAAGCAGGCTTGATGAAGTCAAATCAATCGAAACCAACCACG	GGGACCACTTTGTACAAGAAAGCTGGGTTTTGGAAGGAGGGTAGACAAGCTCATAATC
ORF19.5848		Transcription factor	CEC1429	CCCAGGGAGAAATTCGTTAA	GGGACAAGTTTGTACAAAAAAGCAGGCTtgATGAATCACCCTCGGCATAGAGACAGTATG	GGGACCACTTTGTACAAGAAAGCTGGGTATTATTGTAGGACTCTGAAAGATTTATTGT
ORF19.5849	CWT1	Transcription factor	CEC1429	TTATCCATGCGGTGCAAGCG	GGGACAAGTTTGTACAAAAAAGCAGGCTtgATGTCTACCATGAGTACTCAAAAAGCAAAT	GGGACCACTTTGTACAAGAAAGCTGGGTAGGATCAATGGGGATAAAATTACCCACTAT
ORF19.5855	MBP1	Transcription factor	CEC1429	TTTCACCTGAGCCCGAGAGT	GGGACAAGTTTGTACAAAAAAGCAGGCTtgATGTCAGACTCTCAAATTTATTCAGCAACA	GGGACCACTTTGTACAAGAAAGCTGGGTTTTTTTGACCAATGATTCTTCCATAGCATC
ORF19.59	REI1	Transcription factor	CEC1429	AGCGGACATTTACTGAACAG	GGGACAAGTTTGTACAAAAAAGCAGGCTtgATGAAATCAGAATGGCATCGTTATAATTTG	GGGACCACTTTGTACAAGAAAGCTGGGTTTGTAACAATGGATCTCTGAAATGAGGTTG
ORF19.5917	STP3	Transcription factor	CEC1429	GCCCAGTGTCAATTTCGTTA	GGGACAAGTTTGTACAAAAAAGCAGGCTtgATGTTGATACTTTCCATAGGTTTAATCCAC	GGGACCACTTTGTACAAGAAAGCTGGGTATCTAGTAATAGATTGCTTACATTCTGTTT
ORF19.5940	ZCF32	Transcription factor	CEC1429	ATTAGGTCGCCCAGCTACTG	GGGACAAGTTTGTACAAAAAAGCAGGCTtgATGGAGGAAAAGAAGAAAATCCGTCGAAGT	GGGACCACTTTGTACAAGAAAGCTGGGTCAACAATGTTAGATCAACACCAATTTTTTC
ORF19.5953		Transcription factor	CEC1429	CACGCTTGACCATCTTAGGG	GGGACAAGTTTGTACAAAAAAGCAGGCTtgATGTTTAATACCAAGATATTTGAAAATACA	GGGACCACTTTGTACAAGAAAGCTGGGTATGAGTGGTATGCCCACGATGGTATTTCAA
ORF19.5954		DNA damage and cell cycle regulators	CEC1121	GACCGTGTCGTCAGGTACTT	GGGACAAGTTTGTACAAAAAAGCAGGCTTGATGGCAATATCAAGATCATTGATTACAGAA	GGGACCACTTTGTACAAGAAAGCTGGGTTCTAATCACGTCACCGGTTTTAGATATTCC
ORF19.5956	PIN3	Protein kinase	CEC1429	CATATCACTAGACACGATGC	GGGACAAGTTTGTACAAAAAAGCAGGCTtgATGTCTGCTGCATTAGTTAACCGTTCTTTA	GGGACCACTTTGTACAAGAAAGCTGGGTAAAAATAGAATTGACAATGTTACTACCTAT
ORF19.5968	RDI1	Other	CEC1429	ACGCAGAGAGCATTCCTCAG	GGGACAAGTTTGTACAAAAAAGCAGGCTtgATGTCCAATTCTAACGTTGATGATGATTTA	GGGACCACTTTGTACAAGAAAGCTGGGTTTTAGTAATGGAAAAACTCCAAGGAACTGT
ORF19.5975	TRY4	Transcription factor	CEC1429	ATGGCTCCAGTTCCAGCTTG	GGGACAAGTTTGTACAAAAAAGCAGGCTtgATGTCTTTACCAATGTCACCTGTTTCACCA	GGGACCACTTTGTACAAGAAAGCTGGGTACTGACCAACATATTAACTGACATTTTCAA
ORF19.6028	HGC1	Other	CEC1429	CATCACGTTAAAGCACGCGA	GGGACAAGTTTGTACAAAAAAGCAGGCTtgATGATAAATATAACTAAACCATTAACTCCA	GGGACCACTTTGTACAAGAAAGCTGGGTATGAATCATATTACATAATCGAGTTTTAGT
ORF19.6038	UGA32	Transcription factor	CEC1429	GCATTAGCTCAACTTTGCAC	GGGACAAGTTTGTACAAAAAAGCAGGCTtgATGTTCTACGTATTCGATTTAACATCAAAT	GGGACCACTTTGTACAAGAAAGCTGGGTGCAAAATGAGATGTTCCAATTGTTTTCTTG
ORF19.6081	PHR2	Cell surface	CEC1429	AGCTACAGGTTCGCTAACAT	GGGACAAGTTTGTACAAAAAAGCAGGCTtgATGTTGTTGAAATCTTTATTCCCATCAATC	GGGACCACTTTGTACAAGAAAGCTGGGTCATGGTAATTAAACCGAAACCAACAACGAT
ORF19.6102	RCA1	Transcription factor	CEC1429	AAGGTTAGCTCATCGGGACT	GGGACAAGTTTGTACAAAAAAGCAGGCTtgATGGAGGAGTTGAAGGATGCAAGGGAAGAA	GGGACCACTTTGTACAAGAAAGCTGGGTAATAAATTGCTTCAACCTGTCGGTGTTGCC
ORF19.6109	TUP1	Other	CEC1429	GCCATACTACCCAAGAGTGA	GGGACAAGTTTGTACAAAAAAGCAGGCTtgATGTATCCCCAACGCACCCAGCACCAACAA	GGGACCACTTTGTACAAGAAAGCTGGGTTTTTTTGGTCCATTTCCAAATTCTGGCTTT
ORF19.6124	ACE2	Transcription factor	CEC1429	GAGCATGAGGTACTATGACT	GGGACAAGTTTGTACAAAAAAGCAGGCTtgATGCATTGGAAATTTCTGAACTTTCGAAAG	GGGACCACTTTGTACAAGAAAGCTGGGTTTGCAACATTAAAAACTCCTCAGTAACACT
ORF19.6133	PIF1	DNA damage and cell cycle regulators	CEC1121	GCGCCAAACAGATATGTCTA	GGGACAAGTTTGTACAAAAAAGCAGGCTTGATGCTTAATGCAACCAAATCAATAATCCGA	GGGACCACTTTGTACAAGAAAGCTGGGTTATCTGTGCCCTTGCAACAGACTTTACTGA
ORF19.6142		DNA damage and cell cycle regulators	CEC1121	TACCTTACGGAGTAGGAATG	GGGACAAGTTTGTACAAAAAAGCAGGCTTGATGCCTCCGAAGAAAGGGTTAACCCAGGAA	GGGACCACTTTGTACAAGAAAGCTGGGTTTTTGTGGTTCCTGGACGGATTTCTTCAAA
ORF19.6163	CSE4	DNA damage and cell cycle regulators	CEC1121	ACTACAGAGACACTTCTAGC	GGGACAAGTTTGTACAAAAAAGCAGGCTTGATGGCAAGACTTTCAGGACAAAGTAGTGGC	GGGACCACTTTGTACAAGAAAGCTGGGTCAATATCCAAGACTGTCCTCTGATCCTTCT
ORF19.6170		DNA damage and cell cycle regulators	CEC1121	TACTTGAATACAGGTGGAGC	GGGACAAGTTTGTACAAAAAAGCAGGCTTGATGAGTGACGTAATTGGTACAAAAGTTGCT	GGGACCACTTTGTACAAGAAAGCTGGGTTAAATAGGGTAACTCTTGCGGAGAATCGTC
ORF19.6182	ZCF34	Transcription factor	CEC1429	GAACCGACTTGACTACATTG	GGGACAAGTTTGTACAAAAAAGCAGGCTtgATGACCAAACGTGATCGTACAATCTACAGC	GGGACCACTTTGTACAAGAAAGCTGGGTCGAGATTTTGAGGAAATCCCAATAATCCCA
ORF19.6222	SPO22	DNA damage and cell cycle regulators	CEC1121	TTTGCCACAACAACTGCGAA	GGGACAAGTTTGTACAAAAAAGCAGGCTTGATGTCGCAACTTGTTTCAAACTATGAAAAT	GGGACCACTTTGTACAAGAAAGCTGGGTTTCATATTTACTTATTTCTGATTCAAGTAA
ORF19.6227		Transcription factor	CEC1429	GCACATCGTACTAATCATGC	GGGACAAGTTTGTACAAAAAAGCAGGCTtgATGACTGCCTCTGCCCATTATAACTATAAC	GGGACCACTTTGTACAAGAAAGCTGGGTATCTTCCATTTTACCAATTACTTCTTCTTC
ORF19.6239		Protein kinase	CEC1429	ACTGCCTAGCAAGCATGATA	GGGACAAGTTTGTACAAAAAAGCAGGCTtgATGTCTACTGCAGCAGTTGCAACGAAACCA	GGGACCACTTTGTACAAGAAAGCTGGGTAACATGCCTTCTTTTAGAGCCATTATTCTG
ORF19.6243	VPS34	Other	CEC1429	AGTGCCATCGTATTCCACGT	GGGACAAGTTTGTACAAAAAAGCAGGCTtgATGGCGACACTCTCACAACCACAAATCGCA	GGGACCACTTTGTACAAGAAAGCTGGGTAGCTCTCCAATACTGTGCTAAACTATGTAA
ORF19.6275		Protein kinase	CEC1429	TTGATCGCGCTGGACATCTG	GGGACAAGTTTGTACAAAAAAGCAGGCTtgATGATAGATATATTTGATATGGAAGATGAA	GGGACCACTTTGTACAAGAAAGCTGGGTTTTATTATGTAATGAATAATCAATAAATTT
ORF19.6285	GLC7	Protein phosphatase	CEC1429	CAGTCTCATTCACGGATACT	GGGACAAGTTTGTACAAAAAAGCAGGCTtgATGTCAAACAATATCGAAGACGATTCCATT	GGGACCACTTTGTACAAGAAAGCTGGGTTTTCACAGCCTTCTTTGGTTTTCTTTGATT
ORF19.6302	PGA39	Cell surface	CEC1429	CAACATAGATGCCGGAAGTG	GGGACAAGTTTGTACAAAAAAGCAGGCTtgATGAAAGCTACTACCTTCACTTTATTATTA	GGGACCACTTTGTACAAGAAAGCTGGGTAATTAATAAAGCTCCAACAATGGCAGCAAC
ORF19.6305		Other	CEC1429	CACATGCCGAAATGGGACCA	GGGACAAGTTTGTACAAAAAAGCAGGCTtgATGGATTTCTCTACTTTTGATAAACAAAGT	GGGACCACTTTGTACAAGAAAGCTGGGTTTTATTTTCACTAGTATAGAACTTAAAATT
ORF19.6321	PGA48/SPI1	Cell surface	CEC1429	GCAGTACGCATAATGGTATC	GGGACAAGTTTGTACAAAAAAGCAGGCTtgATGTTTAAATTCGTTATCTACTTGTTCACC	GGGACCACTTTGTACAAGAAAGCTGGGTAATAAAAGCAATAAAGATAGCAGCGACAAG
ORF19.6365	PTP1	Protein phosphatase	CEC1429	CTATATTATGAAGGGTGCGC	GGGACAAGTTTGTACAAAAAAGCAGGCTtgATGTTTCAGTTTATTCCTTTTCCAATATCA	GGGACCACTTTGTACAAGAAAGCTGGGTTCTCTTATATATAGTTCTAGCAGCTTCATA
ORF19.6376	PTC5	Protein phosphatase	CEC1429	AATAGCAGATACGGCCTGAG	GGGACAAGTTTGTACAAAAAAGCAGGCTtgATGTCATTTGTACTTGCAGCTAAACCAAGG	GGGACCACTTTGTACAAGAAAGCTGGGTAAGCTTTGGCTTGGCAGAATTTAATCCACC
ORF19.6407		Transcription factor	CEC1429	GAGTGTGACCCACCATAATC	GGGACAAGTTTGTACAAAAAAGCAGGCTtgATGAGTTTTATGCCCAGCGGATCTAATCCG	GGGACCACTTTGTACAAGAAAGCTGGGTTGTACCCAAAATTTCGTCACGGTAGTGTTT
ORF19.643		DNA damage and cell cycle regulators	CEC1121	CCGTTATTTCTAAGACCTCG	GGGACAAGTTTGTACAAAAAAGCAGGCTTGATGGCAAATATCAACCATGAGATGATTTAC	GGGACCACTTTGTACAAGAAAGCTGGGTATCTTCTGTGGGCATCTCTTCTATCATTTT
ORF19.6472	CYP1	DNA damage and cell cycle regulators	CEC1121	AATGCTGTCCAAGCCCTGTA	GGGACAAGTTTGTACAAAAAAGCAGGCTTGATGTCTACCGTTTACTTTGATGTCTCCGCT	GGGACCACTTTGTACAAGAAAGCTGGGTCAATTGACCAGATTCTTCAATGACAATTTT
ORF19.6506		Transcription factor	CEC1429	CGCCCACAACAATAGTTTGA	GGGACAAGTTTGTACAAAAAAGCAGGCTtgATGGGCTCTAGAGTTGGTAATCGGGGTAGT	GGGACCACTTTGTACAAGAAAGCTGGGTTGACAGAAGAAACTCTAATAATGCTTGTTG
ORF19.6514	CUP9	Transcription factor	CEC1429	GGCCGAGTCCACAAGATACA	GGGACAAGTTTGTACAAAAAAGCAGGCTtgATGAAGTTAGATCAATTAATTAACCAAGCA	GGGACCACTTTGTACAAGAAAGCTGGGTAAAGTTCAAACGCTGTTGTTGTTTCAACAA
ORF19.6537		DNA damage and cell cycle regulators	CEC1121	CCAGCGTGGAAATCATTACA	GGGACAAGTTTGTACAAAAAAGCAGGCTTGATGGATTTTCAAAGTGATTACGAGAAAATT	GGGACCACTTTGTACAAGAAAGCTGGGTTCCGTCCATTTCTTTTAACTGTTGTTGGTA
ORF19.6551.1	STE18	Other	CEC1429	ATGGCGCACACCTTAGACAG	GGGACAAGTTTGTACAAAAAAGCAGGCTtgATGAATGAACAAATTGAGTATCAAATTCAG	GGGACCACTTTGTACAAGAAAGCTGGGTAACAATTGTACAACAACCAACTGTAGCTTG
ORF19.6568	SMC6	DNA damage and cell cycle regulators	CEC1121	AGTGTGCAGCTCCACCTTTG	GGGACAAGTTTGTACAAAAAAGCAGGCTTGATGACTGTACCGTATAAAAGGAAACATGAC	GGGACCACTTTGTACAAGAAAGCTGGGTTTCCTCTCTAGGGGCAGACATTTTGTGAAT
ORF19.6573	BEM2	Other	CEC1429	GATCAGCCTTTACATTCCTG	GGGACAAGTTTGTACAAAAAAGCAGGCTtgATGAGAAAGATTTGGAATAGAAAAGATAAA	GGGACCACTTTGTACAAGAAAGCTGGGTAAATTGAACTTTAAGCTCCTCTTCTTTACC
ORF19.658	GIN1	DNA damage and cell cycle regulators	CEC1121	ATGTCGCATTGCACACGGGT	GGGACAAGTTTGTACAAAAAAGCAGGCTTGATGGATTTGTTAGATGGGATAGAAGACTAT	GGGACCACTTTGTACAAGAAAGCTGGGTTTCAAAGCCTGAATCATCGAAAAATGAACT
ORF19.6588	NBP2	Protein kinase	CEC1429	ATAGCGCCGTAACCGTCTAG	GGGACAAGTTTGTACAAAAAAGCAGGCTtgATGACAAGTCATTTCCCACCAAATACAAAA	GGGACCACTTTGTACAAGAAAGCTGGGTTATTTCAACATCATTTAATTTCTTTTCAAT
ORF19.6589	SSF1	Other	CEC1429	TATGAGTCTGCACGACCCTG	GGGACAAGTTTGTACAAAAAAGCAGGCTtgATGGCTAAGAGAAGAACTAAGAAGAGAACT	GGGACCACTTTGTACAAGAAAGCTGGGTTACATCAACATCACTATATAAATCACTATC
ORF19.6610		DNA damage and cell cycle regulators	CEC1121	TCCAGATTAACAGATAGGCC	GGGACAAGTTTGTACAAAAAAGCAGGCTTGATGTCTACAGAAGAAGAAGATTATTCTAAT	GGGACCACTTTGTACAAGAAAGCTGGGTCTCAATATTTAATGGTGATCTAGTTCTAGC
ORF19.6638	PTC4	Protein phosphatase	CEC1429	GTAAGTCTTTGGAATACCGG	GGGACAAGTTTGTACAAAAAAGCAGGCTtgATGGGTCAACTATTATCACATCCGATTGAA	GGGACCACTTTGTACAAGAAAGCTGGGTCCTGGTAATCCCCTTTTCCTTTAATATTTT
ORF19.6645	HMO1	Transcription factor	CEC1429	TACCGTGACACAGGTGATCG	GGGACAAGTTTGTACAAAAAAGCAGGCTtgATGTCAGACTTGAAAACAACCAAAGACACT	GGGACCACTTTGTACAAGAAAGCTGGGTTGGAGAACCATGGCCAGACTTCTTTTTCTT
ORF19.6680	FGR27	Transcription factor	CEC1429	GCGCATGAGACATTTACATC	GGGACAAGTTTGTACAAAAAAGCAGGCTtgATGTCAGCTCCTATAGTTGAAACCAAAAAA	GGGACCACTTTGTACAAGAAAGCTGGGTCAATTTGTCACCGAAAAACAAATTATAATT
ORF19.6753		Transcription factor	CEC1429	TCTAGCTCCAGAGTATTTGG	GGGACAAGTTTGTACAAAAAAGCAGGCTtgATGTTATCTGCATCTAACGAAGAAGCCATA	GGGACCACTTTGTACAAGAAAGCTGGGTTCCATATATATCCCAACCTTCTTCTTCTTC
ORF19.676		DNA damage and cell cycle regulators	CEC1121	CTAAGGGACTGCAACGGAAC	GGGACAAGTTTGTACAAAAAAGCAGGCTTGATGGTAGTTGGTGAATCAAGGGCAGAATTG	GGGACCACTTTGTACAAGAAAGCTGGGTAAATTCATCATCTTCTACATACTCTTCATA
ORF19.6760	MDS3	DNA damage and cell cycle regulators	CEC1121	ATCAGCGTTCGACATGCAGG	GGGACAAGTTTGTACAAAAAAGCAGGCTTGATGTCTACGTTAATACCTACAGCAAGCGCC	GGGACCACTTTGTACAAGAAAGCTGGGTAAATGGTAATCTGAACTGTGGAACATCCTT
ORF19.6763	SLK19	DNA damage and cell cycle regulators	CEC1121	CGGATCGTCAAAGCTGATAA	GGGACAAGTTTGTACAAAAAAGCAGGCTTGATGTCCGAAACAAAAGAAGCTCCCAAACCA	GGGACCACTTTGTACAAGAAAGCTGGGTTTCGGAGATTTTCTCAATAAGGACCACCTT
ORF19.6781	ZFU2	Transcription factor	CEC1429	GTACACTCTACACAGTTTGC	GGGACAAGTTTGTACAAAAAAGCAGGCTtgATGTCTAAAAGAAGAACGGTGAAACGATCA	GGGACCACTTTGTACAAGAAAGCTGGGTATTAACATCTAGTTCAGGAAATTCTTTAAA
ORF19.6784	PGA32	Cell surface	CEC1429	ACTACTGTGGTCCATGTGGT	GGGACAAGTTTGTACAAAAAAGCAGGCTtgATGAAAGTATCAACATTAATAATTGTTTCT	GGGACCACTTTGTACAAGAAAGCTGGGTTGTGAAAAGCATAATCATGGTTAAAATCAA
ORF19.6792	RRD1	Protein phosphatase	CEC1429	GTAGCATCTCTGCACATCTG	GGGACAAGTTTGTACAAAAAAGCAGGCTtgATGAATTGGAAAACTCCATCGAAAAAGATT	GGGACCACTTTGTACAAGAAAGCTGGGTGCTCCGGGGATTACGAGTATTACGGGTATT
ORF19.681	HAP43	Transcription factor	CEC1429	GATAGAGACACACTCGTCAC	GGGACAAGTTTGTACAAAAAAGCAGGCTtgATGCCCGCAAAAGGTCCTAATATTATACCA	GGGACCACTTTGTACAAGAAAGCTGGGTATTATATGCTCTTCTATCTAATTCTCGTAA
ORF19.6810		Other	CEC1429	CGGCGCGTGTTATAGATATT	GGGACAAGTTTGTACAAAAAAGCAGGCTtgATGAATAATTTTAGTGATGATTTATACCCA	GGGACCACTTTGTACAAGAAAGCTGGGTAGTTAAAATTTCATTAATACCTTTAATACT
ORF19.6817	FCR1	Transcription factor	CEC1429	ACATTTGGCACAAGTGGTCA	GGGACAAGTTTGTACAAAAAAGCAGGCTtgATGTCTGACGATCATTCAATCCATTCTCAT	GGGACCACTTTGTACAAGAAAGCTGGGTAATATTGAAGAAAGGATCCAATGAATTATC
ORF19.6821		DNA damage and cell cycle regulators	CEC1121	ATCACTACTGGAGCATTGGG	GGGACAAGTTTGTACAAAAAAGCAGGCTTGATGGATACACAGGCAGAAATCAATGCTGAT	GGGACCACTTTGTACAAGAAAGCTGGGTCTTGGGTAAACTATAATTTCCGTTTTGAAA
ORF19.6824	TRY6	Transcription factor	CEC1429	CACATAGCATGGGAGGAATC	GGGACAAGTTTGTACAAAAAAGCAGGCTtgATGAGTTTACCTTCACCACCAGTTTTGAAA	GGGACCACTTTGTACAAGAAAGCTGGGTATTCAAAAGGCTATCTATACTTGATTTCCT
ORF19.684		Transcription factor	CEC1429	GCTTTCCGCCAAGACATAAA	GGGACAAGTTTGTACAAAAAAGCAGGCTtgATGACAGACATTTTGGAAGCATACAAACAA	GGGACCACTTTGTACAAGAAAGCTGGGTATCATCATTGTCCGCTGGTCTCTTCTTGCT
ORF19.6850		Transcription factor	CEC1429	ACCTTTGATGAGAGTCTGTG	GGGACAAGTTTGTACAAAAAAGCAGGCTtgATGACTACAACTAGCACAGCATTATTAGAT	GGGACCACTTTGTACAAGAAAGCTGGGTTAAGTCGATAAAATATGCATCTGTGACATC
ORF19.6874		Transcription factor	CEC1429	CCGTGATCTTAATATAGCCG	GGGACAAGTTTGTACAAAAAAGCAGGCTtgATGTTTAATAGACCCGAGCATTATCCACCA	GGGACCACTTTGTACAAGAAAGCTGGGTATCAAGTAATGAAGAAACTGCCATTCTCTT
ORF19.6885	SPO7	DNA damage and cell cycle regulators	CEC1121	AATGCGGATTCAGGTTAGCT	GGGACAAGTTTGTACAAAAAAGCAGGCTTGATGTCGAATTCAATTGGATTTGAGGAGGAA	GGGACCACTTTGTACAAGAAAGCTGGGTATCACTAACCAAAGTATCCGATCTTAATGG
ORF19.6889	MKK2	Protein kinase	CEC1429	TAACTGGAACGAGCTGTGCC	GGGACAAGTTTGTACAAAAAAGCAGGCTtgATGGCCCTGGTACCTCCACTTTTCAAAGTC	GGGACCACTTTGTACAAGAAAGCTGGGTTTCATTTAATTCCCACACCACTTTAACAAA
ORF19.6901		Other	CEC1429	TGATACAGTCGGATTAACCG	GGGACAAGTTTGTACAAAAAAGCAGGCTtgATGCCACTAAAGGAACTAGTTAGCCAGTTT	GGGACCACTTTGTACAAGAAAGCTGGGTGTTTTGCTTAAAATGTAAATCTCTATAACC
ORF19.6915	MRE11	Protein phosphatase	CEC1429	CAACTCCACGTCATATTGTG	GGGACAAGTTTGTACAAAAAAGCAGGCTtgATGCCATTGGTAGAACGTATAGAACCAGGA	GGGACCACTTTGTACAAGAAAGCTGGGTTTTTCTTTTCCTGTTATTAAAGCTTCTGGA
ORF19.6926	CSC25	Protein kinase	CEC1429	CCGATATTTCCAAGGCTGTA	GGGACAAGTTTGTACAAAAAAGCAGGCTtgATGTCATCAGCAAATTACATATCAGATGAG	GGGACCACTTTGTACAAGAAAGCTGGGTCTTTAATGAAAACGGTTTGAAACTCTTGAT
ORF19.6936	RAD53	Protein kinase	CEC1429	GAGATCCAGGTCGCTACATG	GGGACAAGTTTGTACAAAAAAGCAGGCTtgATGGAAGTAACACAACGGACGCAGAGTCAG	GGGACCACTTTGTACAAGAAAGCTGGGTTGAACTTATACTACTTAAACCCGAAATAAG
ORF19.696	STE2	Other	CEC1429	CCGAAGAGGGAATTGCTTTA	GGGACAAGTTTGTACAAAAAAGCAGGCTtgATGAATATCAATTCAACTTTCATACCTGAT	GGGACCACTTTGTACAAGAAAGCTGGGTCACTCTTTTGATGGTGATTTGTTTAGTAAT
ORF19.6980		Protein kinase	CEC1429	CAGTTTAACGCATCGGGACG	GGGACAAGTTTGTACAAAAAAGCAGGCTtgATGCCATTCAAAAATATATTCACATCGTCT	GGGACCACTTTGTACAAGAAAGCTGGGTTGCCATTCCAGCATCTTTTAATCGTTTAAC
ORF19.6987	DNM1	Other	CEC1429	GGAATCATGTGTAACAGGTC	GGGACAAGTTTGTACAAAAAAGCAGGCTtgATGTCGTTTCAAGATCTCATACCAGTAGTC	GGGACCACTTTGTACAAGAAAGCTGGGTAAAGACTTCACTAATTATATCAGAAGCTTC
ORF19.6995	ATO6	DNA damage and cell cycle regulators	CEC1121	CATAGCGGCAAAGCGCGTAA	GGGACAAGTTTGTACAAAAAAGCAGGCTTGATGTCTTCTTTAGAATCAATATCTTCTGAA	GGGACCACTTTGTACAAGAAAGCTGGGTATTTGATGTTTTGCTGACAGCTTTTTTACG
ORF19.6997	ATO5	DNA damage and cell cycle regulators	CEC1121	TGGTAGAACCGAACCCAGAC	GGGACAAGTTTGTACAAAAAAGCAGGCTTGATGTCTTCATCTGCATCAATTACATCCGAT	GGGACCACTTTGTACAAGAAAGCTGGGTCTCTGATGGTTGATTTTCCGACTTTTTACG
ORF19.7017	YOX1	Transcription factor	CEC1429	TGCTCCATGCAAGCCAAATA	GGGACAAGTTTGTACAAAAAAGCAGGCTtgATGATGATGCACTTACAACAAACACCAACT	GGGACCACTTTGTACAAGAAAGCTGGGTTTGTAAATTGGTGATATCACCTAAAGCTTT
ORF19.702		Transcription factor	CEC1429	ATGTTCGGAAGAGCTGTCTC	GGGACAAGTTTGTACAAAAAAGCAGGCTtgATGACTAGTGAAAAGTATACCTGTTTGACA	GGGACCACTTTGTACAAGAAAGCTGGGTTTCGCCAAAAGTATCATTATCATGTATAGC
ORF19.703		DNA damage and cell cycle regulators	CEC1121	AGGCGATGATGGCATTTACT	GGGACAAGTTTGTACAAAAAAGCAGGCTTGATGGGTATGTTCTTTTTTTTATTTTCATTA	GGGACCACTTTGTACAAGAAAGCTGGGTGTGTATATCAACACTTCCTAAAACTACCCA
ORF19.7033		Protein phosphatase	CEC1429	GAGGTCACGACATCATCTGC	GGGACAAGTTTGTACAAAAAAGCAGGCTtgATGAGTATAACAAGAACTAGTACTGCCACT	GGGACCACTTTGTACAAGAAAGCTGGGTTAAATATGGAGTATTTAATTTAGTTATTTC
ORF19.7044	RIM15	Protein kinase	CEC1429	GACTACACCGAATCTGATAC	GGGACAAGTTTGTACAAAAAAGCAGGCTtgATGTCGAATACTCCCAATAAATCAACACCT	GGGACCACTTTGTACAAGAAAGCTGGGTACTACGTAATATCCGACAAACTTTAGAAAT
ORF19.7081	SPL1	Other	CEC1429	CCTGGCCTGAAATCAAGTAA	GGGACAAGTTTGTACAAAAAAGCAGGCTtgATGTATAAATCAATTTTCAAAACGACTGGC	GGGACCACTTTGTACAAGAAAGCTGGGTATGACCACTCCATTCAATTGTATTCAAATC
ORF19.71		DNA damage and cell cycle regulators	CEC1121	AAAGCACCTTGAACGGGCTC	GGGACAAGTTTGTACAAAAAAGCAGGCTTGATGCTTTATCCTTCGTTATCGAATTTTTCG	GGGACCACTTTGTACAAGAAAGCTGGGTTTTGCTACTTTGAGGAGGTGGAGGTGGCGG
ORF19.7105	FAR1	Other	CEC1429	GCATTAAGTGTAACGCAGAG	GGGACAAGTTTGTACAAAAAAGCAGGCTtgATGCGCAAACTGTTCCACTCTCCTAAAAAG	GGGACCACTTTGTACAAGAAAGCTGGGTTATTAAACTATTCATCAAATCGGAACATCG
ORF19.7114	CSA1WAP1	Cell surface	CEC1429	TTGTACCCACTAGACGTGCG	GGGACAAGTTTGTACAAAAAAGCAGGCTtgATGCTTCCATCCATTGTTATTTCAATCGTT	GGGACCACTTTGTACAAGAAAGCTGGGTAATAAAGAGACCAACAAACACGAAACTAGC
ORF19.7115	SAC7	Other	CEC1429	CGAACGAGTCTTAATTGCTC	GGGACAAGTTTGTACAAAAAAGCAGGCTtgATGGAACTGGGTATGTTCAGTAGTATAATA	GGGACCACTTTGTACAAGAAAGCTGGGTCTTATCCAGTTGGTGAACGGACAGCGACGA
ORF19.7150	NRG1	Transcription factor	CEC1429	TGCACGATGTTAAGTCCGCG	GGGACAAGTTTGTACAAAAAAGCAGGCTtgATGCTTTATCAACAATCATATCCAATAACA	GGGACCACTTTGTACAAGAAAGCTGGGTTACTAGGCTCTTGGTGTTGTATTTTGTTCC
ORF19.7164		Protein kinase	CEC1429	TAGTCCTAGCCAGTCAGTCG	GGGACAAGTTTGTACAAAAAAGCAGGCTtgATGGATGTATTACTATCGATTTTTGGAACT	GGGACCACTTTGTACAAGAAAGCTGGGTCGTTCCTAACTGTCTCGTTAATTCCAAGAC
ORF19.718	RRN11	Transcription factor	CEC1429	AAAGCCACTGTCCGAAGACG	GGGACAAGTTTGTACAAAAAAGCAGGCTtgATGTTTGAAGATATAACATTTCGAAATAAT	GGGACCACTTTGTACAAGAAAGCTGGGTATTGGAATCGGAATCAAAATCAAAATCAAA
ORF19.719		Transcription factor	CEC1429	GGGAAGAAATTAACCGTCCG	GGGACAAGTTTGTACAAAAAAGCAGGCTtgATGCTAATAAATAAGACTCAACAATATATC	GGGACCACTTTGTACAAGAAAGCTGGGTCATCTCATATTCTCCTATAGATTCTTCTTT
ORF19.7195	RAD6	DNA damage and cell cycle regulators	CEC1121	CATACTTACGAAGCTGTACC	GGGACAAGTTTGTACAAAAAAGCAGGCTTGATGTCAACACCTGCTAGAAGAAGACTTATG	GGGACCACTTTGTACAAGAAAGCTGGGTATCCTCATCTATATTATCATCATCATCATC
ORF19.7208	CSK1	Protein kinase	CEC1429	TCAGATGTGACAAGAGTCGA	GGGACAAGTTTGTACAAAAAAGCAGGCTtgATGGCTACACTCAAAAACAAAAACAATCAC	GGGACCACTTTGTACAAGAAAGCTGGGTCTCTATTCCCGTTTTAGAAATCTCTTTGAA
ORF19.7227		Other	CEC1429	CCAGGCATAGAAGGTTATAC	GGGACAAGTTTGTACAAAAAAGCAGGCTtgATGTCTCAACAAAGAGAAAACCAAAGAGGA	GGGACCACTTTGTACAAGAAAGCTGGGTTTTTCCGGGCACCTTTGATTGGTTTTTGTA
ORF19.723	BCR1	Transcription factor	CEC1429	ATAGAGACTGAAGCCCACGC	GGGACAAGTTTGTACAAAAAAGCAGGCTtgATGTCAGGGACATCACAAGTACTTCAAAAC	GGGACCACTTTGTACAAGAAAGCTGGGTTTGTGATATTAAATTATTTATCGTAGGTTT
ORF19.7234		Transcription factor	CEC1429	TATCAGCGGCCATGTTGCAG	GGGACAAGTTTGTACAAAAAAGCAGGCTtgATGTCAGCTGAACCCGAAATACCAAAAGTT	GGGACCACTTTGTACAAGAAAGCTGGGTGCCAGACCAAAATTGGTAAGCCTTGGGTTC
ORF19.7250		Other	CEC1429	CCTCAGGAAGGAGAAGTCAC	GGGACAAGTTTGTACAAAAAAGCAGGCTtgATGTCGAATCAACCTTCAAGAACAATAGTA	GGGACCACTTTGTACAAGAAAGCTGGGTTCCTTGTTCAGGAAGTTTTGATCGGTTCTC
ORF19.7251	WSC4	Other	CEC1429	CAGGCTATTCAATCTGATCC	GGGACAAGTTTGTACAAAAAAGCAGGCTtgATGACATTACGAAACCAAGCAATGCCAGCA	GGGACCACTTTGTACAAGAAAGCTGGGTCTCAGGATTAGTGATTTTAAGCTTTCTTGA
ORF19.7257	MLH3	DNA damage and cell cycle regulators	CEC1121	TTCCCGCGAGGCAAAGAGAA	GGGACAAGTTTGTACAAAAAAGCAGGCTTGATGATTGTTGACAAAAAAGAAAAAGGTTTT	GGGACCACTTTGTACAAGAAAGCTGGGTCATAAGGTTTGCTATTGGAACTATAGAAGG
ORF19.726	PPZ1	Protein phosphatase	CEC1429	GGTTGCCGCACAAAGCCAAA	GGGACAAGTTTGTACAAAAAAGCAGGCTtgATGGGTTCTAATTCATCTAAATCAGCTCCA	GGGACCACTTTGTACAAGAAAGCTGGGTTGTAGATTTCTTTCTTTCTTGTTTTTCTTT
ORF19.7281	PDK2	Other	CEC1429	GTTAGAGCACCGGACACATC	GGGACAAGTTTGTACAAAAAAGCAGGCTtgATGGGTACAGCTTGGGAATTAACACAGGCT	GGGACCACTTTGTACAAGAAAGCTGGGTTGGAAGCGGTTCATTAGAACTGCTTAATCT
ORF19.7308	TUB1	DNA damage and cell cycle regulators	CEC1121	CACCAGCCGTGACTGTGTTT	GGGACAAGTTTGTACAAAAAAGCAGGCTTGATGAGAGAAGTCATCAGTATTAATGGTATG	GGGACCACTTTGTACAAGAAAGCTGGGTATATTCTTCTTCTTCTTCAGGGAAAGAATC
ORF19.7310		DNA damage and cell cycle regulators	CEC1121	TTACTCAGCCCAGGATGTCG	GGGACAAGTTTGTACAAAAAAGCAGGCTTGATGTATTTCCCAATCATTGTATGGTTATAT	GGGACCACTTTGTACAAGAAAGCTGGGTAAAACCAACTACAGACTTCAATTTTGCAAT
ORF19.7317	UGA33	Transcription factor	CEC1429	AGATGACCGGAACTTCGTCC	GGGACAAGTTTGTACAAAAAAGCAGGCTtgATGTCCTCACAATCCCCAAGATTTAAAAGA	GGGACCACTTTGTACAAGAAAGCTGGGTAATCATGGATATTTTCCAATTGAAATCATG
ORF19.7319	SUC1	Transcription factor	CEC1429	AGCGATCTCCAATACGACTA	GGGACAAGTTTGTACAAAAAAGCAGGCTtgATGTCCAAAGGTAAAAGAGCACCTTATACA	GGGACCACTTTGTACAAGAAAGCTGGGTTTTTTGATAATCTGGTATGTAACTGGGAGT
ORF19.7355	SSN8	DNA damage and cell cycle regulators	CEC1121	CCCTCCAGGAAAGTTGATAA	GGGACAAGTTTGTACAAAAAAGCAGGCTTGATGTCAGCTGATTATTGGAATTCATCACAA	GGGACCACTTTGTACAAGAAAGCTGGGTAATCCGATTGAGTAACATCACTTGTAATGC
ORF19.7359	CRZ1	Transcription factor	CEC1429	AAGCATTGCGAATCATAGCC	GGGACAAGTTTGTACAAAAAAGCAGGCTtgATGTCTAACAATCCTCATCCCCAGGATGAT	GGGACCACTTTGTACAAGAAAGCTGGGTAGTAATTTCAACACCACTACTAGTAGCAAG
ORF19.7372	MRR1	Transcription factor	CEC1429	GCATCACAGCAATGGGCATA	GGGACAAGTTTGTACAAAAAAGCAGGCTtgATGTCAATTGCCACCACCCCTATAGAAACA	GGGACCACTTTGTACAAGAAAGCTGGGTATTGGTAAAAAGTTGATCAAATGGTAAATC
ORF19.7374	CTA4	Transcription factor	CEC1429	ACAGCGTCTGAACCTATATC	GGGACAAGTTTGTACAAAAAAGCAGGCTtgATGACATCTGAACATAAAGTATCAAGAAAC	GGGACCACTTTGTACAAGAAAGCTGGGTTCCATAAAAATATCCATCATCCATAAGGTC
ORF19.7385		Transcription factor	CEC1429	GGCCTAGATATAAGCAGAGC	GGGACAAGTTTGTACAAAAAAGCAGGCTtgATGATGGGTATCACTCATTTGGTATCTGAT	GGGACCACTTTGTACAAGAAAGCTGGGTATCCATTAAAAATACATTACCATTATCATG
ORF19.7388	PBS2	Protein kinase	CEC1429	GATCACCAAAGAAGCGTCGC	GGGACAAGTTTGTACAAAAAAGCAGGCTtgATGGTTGAAGATAAAGATATAGACTTGAAT	GGGACCACTTTGTACAAGAAAGCTGGGTATGATTATTAAGAAAGCTTCTATTCACTTT
ORF19.7402	DOT1	DNA damage and cell cycle regulators	CEC1121	CACTAGCTGCAATGAGGTTA	GGGACAAGTTTGTACAAAAAAGCAGGCTTGATGATATCAGGACATCTACAAACACCAGAT	GGGACCACTTTGTACAAGAAAGCTGGGTATTTTTGATAATCTCCGATTCTGAAGAGTC
ORF19.7414	ALS6/ALS97	Cell surface	CEC1429	AATACTCGGAAACGTCGGCA	GGGACAAGTTTGTACAAAAAAGCAGGCTtgATGAAGACAGTAATACTATTACATCTTTTT	GGGACCACTTTGTACAAGAAAGCTGGGTTAAGAAGAAGAATAATGCAACGCTAATAAA
ORF19.7417	TSA1	Other	CEC1429	CAATCACGTCTAATGAGGAG	GGGACAAGTTTGTACAAAAAAGCAGGCTtgATGGCTCCAGTCGTTCAACAACCAGCTCCA	GGGACCACTTTGTACAAGAAAGCTGGGTTTTGTTGACTTTGTTGAAGTATTCCTTGGA
ORF19.744	GDB1	Other	CEC1429	GGATCATACTCAATGCCTAC	GGGACAAGTTTGTACAAAAAAGCAGGCTtgATGTCCGAAGCACGTACTGTTTTATTTCGA	GGGACCACTTTGTACAAGAAAGCTGGGTTTGAAAATGTTTATCATTCCAAAGATCATA
ORF19.7451	FUN31	Protein kinase	CEC1429	TGTCACAGCACTAACAGGAC	GGGACAAGTTTGTACAAAAAAGCAGGCTtgATGACTTCAAACCGGCCGCCACCACCATCA	GGGACCACTTTGTACAAGAAAGCTGGGTGATCTGTAACCATTCATCCTCCATAATATC
ORF19.7472	IFF4	Cell surface	CEC1429	TGCTAGTCGATGCCACCGAT	GGGACAAGTTTGTACAAAAAAGCAGGCTtgATGAAATTCCTTCAAAAATTTATAATCACA	GGGACCACTTTGTACAAGAAAGCTGGGTGATAAGTAATATTAAAATACTAACAACTGT
ORF19.7473		DNA damage and cell cycle regulators	CEC1121	CGAGTAATCTAAGCGATCAG	GGGACAAGTTTGTACAAAAAAGCAGGCTTGATGAATAGTTTCATTAGTGAGGACTCTGAC	GGGACCACTTTGTACAAGAAAGCTGGGTTTTCCGCCTTCTTGGAGGAGGAGGTGGTGG
ORF19.7504		Other	CEC1429	TATTTCGCACGGAGCACTCG	GGGACAAGTTTGTACAAAAAAGCAGGCTtgATGGTTAATAATCTCACTTCTGGTATTGCA	GGGACCACTTTGTACAAGAAAGCTGGGTTTTTTTCTTCAATAATTCCAATTCTCCTTG
ORF19.7510	KIN2	Protein kinase	CEC1429	TTTGACCCTCGACGTTGGCT	GGGACAAGTTTGTACAAAAAAGCAGGCTtgATGAACAATCAAGACCCAGATTCACAATAC	GGGACCACTTTGTACAAGAAAGCTGGGTTAAATTCATTTCATTTAAAATCTGACTAGC
ORF19.7518	ZCF38	Transcription factor	CEC1429	TGGTGTCCTCACTCCTGGAT	GGGACAAGTTTGTACAAAAAAGCAGGCTtgATGTCAAATTCAACAACTACACCTCGAGCC	GGGACCACTTTGTACAAGAAAGCTGGGTTATGTTCATAGCATCATTCCAGTCAGGGAA
ORF19.7547		Transcription factor	CEC1429	ATAGAGCGTCCCATTCGTCG	GGGACAAGTTTGTACAAAAAAGCAGGCTtgATGTCAATTCCAATAAACCTTAATGATGAT	GGGACCACTTTGTACAAGAAAGCTGGGTTTTATGTAAGAAATGAACTGGACATTCACC
ORF19.7570	UGA3	Transcription factor	CEC1429	AAGTACGTCGAAGCAGCAGC	GGGACAAGTTTGTACAAAAAAGCAGGCTtgATGATAGTAACATTTAATTCAAGATCACAA	GGGACCACTTTGTACAAGAAAGCTGGGTTGCAAAATTTATATCCCAACCCAATTCTTT
ORF19.7583	ZCF39	Transcription factor	CEC1429	TCACCGTTGTAACTGCTGCG	GGGACAAGTTTGTACAAAAAAGCAGGCTtgATGTCTACCGATACAACTGCAAATGATGAA	GGGACCACTTTGTACAAGAAAGCTGGGTTGAAAATCTATTAAAATCGGTACTTAAATC
ORF19.7617		DNA damage and cell cycle regulators	CEC1121	GCGATGGAGCGACTTTCTCT	GGGACAAGTTTGTACAAAAAAGCAGGCTTGATGGGAATAACGATTCGACAGGCAACTATA	GGGACCACTTTGTACAAGAAAGCTGGGTGTCTTCTAATAAATCTTTAATTAAATCATC
ORF19.7625	PGA1	Cell surface	CEC1429	GCTCACACGCAAGAATCGGA	GGGACAAGTTTGTACAAAAAAGCAGGCTtgATGAATTTCAACAAGTTTCTAATCATAATT	GGGACCACTTTGTACAAGAAAGCTGGGTTAATAAACCTAAAATCAAAACAATACCACC
ORF19.7644		Transcription factor	CEC1429	ATCGCAACTAACGCGCTATA	GGGACAAGTTTGTACAAAAAAGCAGGCTtgATGAAGGTGGAAATAGTTGAATGGAAGAGT	GGGACCACTTTGTACAAGAAAGCTGGGTTCCAATCGTTTCAGGAACATACTCCTCAAA
ORF19.7652	CKA1	Protein kinase	CEC1429	TAGCACCTGAGACACTTGCG	GGGACAAGTTTGTACAAAAAAGCAGGCTtgATGTCCTCGCACCGCCATAATACAGTGCAA	GGGACCACTTTGTACAAGAAAGCTGGGTACTAACAGCTACTCTAATTGGGTCGAAATA
ORF19.7663		DNA damage and cell cycle regulators	CEC1121	TGTTAGACACCCGTGCAAGC	GGGACAAGTTTGTACAAAAAAGCAGGCTTGATGGCCCCAAAGAAACAAGCTACGGTAGTG	GGGACCACTTTGTACAAGAAAGCTGGGTCTTTTTGTTTAAGGCTCGATTGACTTTCCC
ORF19.791	RIM11	Protein kinase	CEC1121	CCTCGACCAGTATCTTAAAG	GGGACAAGTTTGTACAAAAAAGCAGGCTTGATGTCTGCCAAAATAGAACTTGTAACGGAG	GGGACCACTTTGTACAAGAAAGCTGGGTTTCAAGGGTAACTTTTAATTCATCAGCAGA
ORF19.793	CAK1	Protein kinase	CEC1429	GACGGTACTCCATTTGTATG	GGGACAAGTTTGTACAAAAAAGCAGGCTtgATGAAGTTGTCAGATTATTATATAGACAAG	GGGACCACTTTGTACAAGAAAGCTGGGTATCTAACATTAATTGTAAGATTTCTTTAGA
ORF19.794	SSN3	Protein kinase	CEC1429	CGCCATTTCTGTAAGACCGG	GGGACAAGTTTGTACAAAAAAGCAGGCTtgATGAGTTATAGTTCAGCTTCATTTAGAAAA	GGGACCACTTTGTACAAGAAAGCTGGGTCCCACGTTTCTTTCTAATTCCACCAGGTAA
ORF19.799	STE4	Other	CEC1429	GCGGGACACATTGAACACAC	GGGACAAGTTTGTACAAAAAAGCAGGCTtgATGTCCGATTATCTTGCTCAATCGTTAATT	GGGACCACTTTGTACAAGAAAGCTGGGTGACGGACCAAACTTTGATTGTAGCATCCCA
ORF19.829	SCH9	Protein kinase	CEC1429	CAAGAGACGCTAATTGCGGC	GGGACAAGTTTGTACAAAAAAGCAGGCTtgATGGTAGATTTTGCAAAATCATTATTTGGT	GGGACCACTTTGTACAAGAAAGCTGGGTAAGATCAAATCTTCCATTGACAAATTCATC
ORF19.843		Protein phosphatase	CEC1429	CAGAGCTGCAAATGCTGGAA	GGGACAAGTTTGTACAAAAAAGCAGGCTtgATGTTACTACCTAAAAGACTATTGCGACTG	GGGACCACTTTGTACAAGAAAGCTGGGTCCAATTAACCACGTCACCGTTTGATACTAA
ORF19.844	STE11	Protein kinase	CEC1429	CGATGTAGCTCCATTCTATG	GGGACAAGTTTGTACAAAAAAGCAGGCTtgATGACAGAGATTAATGATTCTACAGAAAAC	GGGACCACTTTGTACAAGAAAGCTGGGTTTGTTTCGACATAATTAATGGATTTAAAAA
ORF19.848	PGA16	Cell surface	CEC1429	GCCAGATGTCAACACAGCTA	GGGACAAGTTTGTACAAAAAAGCAGGCTtgATGAGGGTTTTCCAAATTGTATACATTTTA	GGGACCACTTTGTACAAGAAAGCTGGGTCAACAAAAGCATAGCACCAAATATTGCTGC
ORF19.861	CAP4	Transcription factor	CEC1429	GATCACTACACAGTATGTCC	GGGACAAGTTTGTACAAAAAAGCAGGCTtgATGAATGTTTTTACATCATGGACAAAAAGT	GGGACCACTTTGTACAAGAAAGCTGGGTATTGTCCGTTGATGCATTATTTTCTTTCCC
ORF19.876	PGA33	Cell surface	CEC1429	TAGAGAGTCCGTGCAACCTC	GGGACAAGTTTGTACAAAAAAGCAGGCTtgATGAGAGGTATCATTTTATTGAGTTTTGTT	GGGACCACTTTGTACAAGAAAGCTGGGTTATACCCAAAGAACCGCCAATAAAACCTAT
ORF19.878	NBN1	Transcription factor	CEC1429	ATAGGCACGGAATCTTGCGC	GGGACAAGTTTGTACAAAAAAGCAGGCTtgATGGATACATCAACTGTACTTGAGAAATAC	GGGACCACTTTGTACAAGAAAGCTGGGTGTTCTTCCGTTTCTTTTTTCTTTTCTCCAT
ORF19.889	THI20	Transcription factor	CEC1429	ATATCTGCATCAGGCTGCGG	GGGACAAGTTTGTACAAAAAAGCAGGCTtgATGACAATTGCTGGTAGCGACTCTTCTGGA	GGGACCACTTTGTACAAGAAAGCTGGGTTATGTTCAACACTTCATCCCAAAAGTCTAT
ORF19.895	HOG1	Protein kinase	CEC1429	TTTACCGCGAGACGCTCATG	GGGACAAGTTTGTACAAAAAAGCAGGCTtgATGTCTGCAGATGGAGAATTTACAAGAACC	GGGACCACTTTGTACAAGAAAGCTGGGTAGCTCCGTTGGCGGAATCCAAGTTGTTTTG
ORF19.921	HMS1	Transcription factor	CEC1429	GGACACGAGTGAGATATTCT	GGGACAAGTTTGTACAAAAAAGCAGGCTtgATGATATTTAAATTGAATGATTATAACGCA	GGGACCACTTTGTACAAGAAAGCTGGGTCATATCTTCATCAATAACTAAACCTAACAT
ORF19.940	BUD2	Other	CEC1429	GGTCATTTACAATCGTCTCC	GGGACAAGTTTGTACAAAAAAGCAGGCTtgATGCCTCCAGCTTATCAATCTGCATTTCAT	GGGACCACTTTGTACAAGAAAGCTGGGTATTTTTCCGTAACCATTTTTTGAATGGATT
ORF19.967		DNA damage and cell cycle regulators	CEC1121	CTATGTAGGAGCACGCTTTG	GGGACAAGTTTGTACAAAAAAGCAGGCTTGATGTCGAAACTACTTGTTAACACCCTTAGT	GGGACCACTTTGTACAAGAAAGCTGGGTTGGCTTTCCAGCAGGTAAAGCTAATACTTT
ORF19.971	SKN7	Transcription factor	CEC1429	TGGTCTCCACGATCACTTGG	GGGACAAGTTTGTACAAAAAAGCAGGCTtgATGTCTTCATTACAACAACCCATACCCCCA	GGGACCACTTTGTACAAGAAAGCTGGGTACTCAATTTCTGTTTCTTTACCGTAGGTTC
ORF19.976	BRE1	Transcription factor	CEC1429	GTGGGCATACAACACCAGCA	GGGACAAGTTTGTACAAAAAAGCAGGCTtgATGGCTGTTGATAACGAAAAGAAAAGGTCT	GGGACCACTTTGTACAAGAAAGCTGGGTCAAGTGAATTGATAACAAGTCATTAGCAGA
ORF19.996		DNA damage and cell cycle regulators	CEC1121	CTGGACTGGATACTGTGATT	GGGACAAGTTTGTACAAAAAAGCAGGCTTGATGACACGTGCAAAAAACAATGCTGATTTT	GGGACCACTTTGTACAAGAAAGCTGGGTATCCATAAAATCTCTTTTCACCCGTTTGAA
ORF19.10711	PIKalpha	Other	CEC1429	TATATTGATCGAGGCTGGCT	GGGACAAGTTTGTACAAAAAAGCAGGCTtgATGTCTGCAGATATAACTGAAACCCCAAAT	GGGACCACTTTGTACAAGAAAGCTGGGTAAACTAGTAGAGTTTGGCAGCCCAAAAACA
