# Supplementary material for: Targeted Changes of the Cell Wall Proteome Influence Candida albicans Ability to Form Single- and Multi-strain Biofilms
Source: PLoS Pathog. 2014 Dec 11;10(12):e1004542. doi: 10.1371/journal.ppat.1004542 (PMC4263760; doi:10.1371/journal.ppat.1004542)
Supplement: S2 Table — Complete fitness profiling data of planktonic-cell growth. Headers: Probe ID, Microarray probe identifier; ORF19 #, orf19 nomenclature from the Assembly 21 version of the Candida albicans genome at the CGD; Gene name, gene name according to CGD; Description, gene description according to CGD; fold change, fold-change abundance of the strain carrying the corresponding ORF treated with doxycycline as compared to untreated control; Z-score, Z-score value of the strain carrying the corresponding ORF; p-student, p-value of the corresponding fold-change value using a Student's t-test (within group). (XLSX) [file ppat.1004542.s012.xlsx]

## Sheet: Complete fitness score dataset
Probe ID	ORF19 #	Gene name	Description	fold change	Z-score	p-student
mtlalpha1	ORF19.10712	MTLALPHA1		-1.02408	-0.13636	0.16046
mtlalpha1_RC	ORF19.10712	MTLALPHA1		-1.02027	-0.08717	0.59635
mtlalpha2	MTLALPHA2	MTLALPHA2	Homeodomain protein of MTLalpha (Mating Type Like) locus; alpha2p, together with a1p, repress white-opaque switching and mating (an opaque-specific process); a/alpha mating type may increase virulence, provides competitive advantage	-1.08888	-0.98222	0.35733
mtlalpha2_RC	MTLALPHA2	MTLALPHA2	Homeodomain protein of MTLalpha (Mating Type Like) locus; alpha2p, together with a1p, repress white-opaque switching and mating (an opaque-specific process); a/alpha mating type may increase virulence, provides competitive advantage	-1.00145	0.14096	0.98316
orf19.1002	ORF19.1002	ORF19.1002	Hap43p-repressed gene	1.11203	0.42339
orf19.1002_RC	ORF19.1002	ORF19.1002	Hap43p-repressed gene	1.0775	0.18067
orf19.1028	ORF19.1028	ORF19.1028	Ortholog(s) have ubiquitin-protein ligase activity, role in protein ubiquitination involved in ubiquitin-dependent protein catabolic process and Cul3-RING ubiquitin ligase complex, elongin complex localization	1.09127	0.2784	0.07282
orf19.1028_RC	ORF19.1028	ORF19.1028	Ortholog(s) have ubiquitin-protein ligase activity, role in protein ubiquitination involved in ubiquitin-dependent protein catabolic process and Cul3-RING ubiquitin ligase complex, elongin complex localization	1.06152	0.06568	0.31754
orf19.1069	ORF19.1069	RPN4	DNA binding protein with Cys2-His2 zinc-finger; putative regulator of proteasome genes; DNA recognition sequence (GAAGGCAAAA) enriched in regions upstream of proteasome genes; induced in core stress response; Hap43p-induced gene	-1.12657	-1.04724	0.1358
orf19.1069_RC	ORF19.1069	RPN4	DNA binding protein with Cys2-His2 zinc-finger; putative regulator of proteasome genes; DNA recognition sequence (GAAGGCAAAA) enriched in regions upstream of proteasome genes; induced in core stress response; Hap43p-induced gene	1.08682	0.8327	0.2308
orf19.1105.2	ORF19.1105.2	PGA56	Regulator of sorbose utilization; putative GPI-anchor; predicted helix-loop helix domain; hyphal induced; induced during cell wall regeneration; colony morphology-related gene regulation by Ssn6p; transcription activated by Tbf1p, Hap43p	1.05529	0.82339	0.33057
orf19.1105.2_RC	ORF19.1105.2	PGA56	Regulator of sorbose utilization; putative GPI-anchor; predicted helix-loop helix domain; hyphal induced; induced during cell wall regeneration; colony morphology-related gene regulation by Ssn6p; transcription activated by Tbf1p, Hap43p	1.01857	0.40145	0.69355
orf19.1135	ORF19.1135	CAS1	Putative transcription factor with beta-barrel DNA-binding motif; involved in telomerase regulation and telomere protection; mutation causes marginal increase in caspofungin sensitivity	1.07211	0.14212	0.16695
orf19.1135_RC	ORF19.1135	CAS1	Putative transcription factor with beta-barrel DNA-binding motif; involved in telomerase regulation and telomere protection; mutation causes marginal increase in caspofungin sensitivity	-1.25975	-2.21982
orf19.115	ORF19.115	ORF19.115	Has domain(s) with predicted intracellular localization	-1.01257	-0.2411	0.71009
orf19.115_RC	ORF19.115	ORF19.115	Has domain(s) with predicted intracellular localization	-1.02495	-0.46358	0.74413
orf19.1150	ORF19.1150	ORF19.1150	Oral infection upregulated gene; mutant has reduced capacity to damage oral epithelial cells; regulated by Gcn2p and Gcn4p	-1.09888	-1.06001	0.32804
orf19.1150_RC	ORF19.1150	ORF19.1150	Oral infection upregulated gene; mutant has reduced capacity to damage oral epithelial cells; regulated by Gcn2p and Gcn4p	1.11076	1.53225	0.37484
orf19.1178	ORF19.1178	ORF19.1178	Putative transcription factor with bZIP DNA-binding motif; Hap43p-repressed gene	undetected	undetected
orf19.1178_RC	ORF19.1178	ORF19.1178	Putative transcription factor with bZIP DNA-binding motif; Hap43p-repressed gene	1.03871	-0.00437
orf19.1187	ORF19.1187	CPH2	Myc-bHLH family transcriptional activator of hyphal growth; directly regulates Tec1p, which regulates hypha-specific genes; probably homodimeric, phosphorylated; required for wild-type levels of Candida colonization of the mouse GI tract	-1.06265	-0.62433	0.67189
orf19.1187_RC	ORF19.1187	CPH2	Myc-bHLH family transcriptional activator of hyphal growth; directly regulates Tec1p, which regulates hypha-specific genes; probably homodimeric, phosphorylated; required for wild-type levels of Candida colonization of the mouse GI tract	1.09058	1.31069	0.275
orf19.1189	ORF19.1189	ORF19.1189	Late-stage biofilm-induced gene; transcription regulated upon yeast-hyphal switch; transcriptionally activated by Mnl1p under weak acid stress; contains a 5' UTR intron	-1.10842	-1.18445	0.18184
orf19.1189_RC	ORF19.1189	ORF19.1189	Late-stage biofilm-induced gene; transcription regulated upon yeast-hyphal switch; transcriptionally activated by Mnl1p under weak acid stress; contains a 5' UTR intron	-1.02245	-0.12685	0.72252
orf19.1196	ORF19.1196	ORF19.1196	Ortholog(s) have protein kinase activity and role in MAPK cascade involved in cell wall biogenesis, protein phosphorylation	1.0268	0.52686	0.53561
orf19.1196_RC	ORF19.1196	ORF19.1196	Ortholog(s) have protein kinase activity and role in MAPK cascade involved in cell wall biogenesis, protein phosphorylation	1.07241	1.1006	0.29865
orf19.1217	ORF19.1217	ORF19.1217	Ortholog(s) have ribosome binding, ubiquitin-protein ligase activity, role in chromatin modification, chromatin silencing at telomere, protein ubiquitination, ubiquitin-dependent protein catabolic process and nucleus, ribosome localization	-1.06816	-0.53836	0.40172
orf19.1217_RC	ORF19.1217	ORF19.1217	Ortholog(s) have ribosome binding, ubiquitin-protein ligase activity, role in chromatin modification, chromatin silencing at telomere, protein ubiquitination, ubiquitin-dependent protein catabolic process and nucleus, ribosome localization	1.03145	0.26887	0.24322
orf19.1220	ORF19.1220	RVS167	SH3-domain- and BAR domain-containing protein involved in endocytosis; null mutant exhibits defects in hyphal growth, virulence, cell wall integrity, and actin patch localization; cosediments with phosphorylated Myo5p	-1.11878	-1.01581	0.07005
orf19.1220_RC	ORF19.1220	RVS167	SH3-domain- and BAR domain-containing protein involved in endocytosis; null mutant exhibits defects in hyphal growth, virulence, cell wall integrity, and actin patch localization; cosediments with phosphorylated Myo5p	-1.17096	-1.47973	0.33778
orf19.1223	ORF19.1223	DBF2	Essential serine/threonine protein kinase involved in mitotic spindle formation and cytokinesis; required for septum formation, exit from mitosis, and normal hyphal morphogenesis; virulence-group-correlated expression	1.21334	1.16454	0.29774
orf19.1223_RC	ORF19.1223	DBF2	Essential serine/threonine protein kinase involved in mitotic spindle formation and cytokinesis; required for septum formation, exit from mitosis, and normal hyphal morphogenesis; virulence-group-correlated expression	1.25127	1.33121	0.20182
orf19.1224	ORF19.1224	FRP3	Putative ammonium transporter; upregulated in the presence of human neutrophils; fluconazole-downregulated; repressed by nitric oxide	1.04843	-0.02976	0.83507
orf19.1224_RC	ORF19.1224	FRP3	Putative ammonium transporter; upregulated in the presence of human neutrophils; fluconazole-downregulated; repressed by nitric oxide	-1.05303	-0.7913	0.73468
orf19.124	ORF19.124	CIC1	Putative proteasome-interacting protein; transcription is upregulated in both intermediate and mature biofilms	-1.00468	0.12877	0.20656
orf19.124_RC	ORF19.124	CIC1	Putative proteasome-interacting protein; transcription is upregulated in both intermediate and mature biofilms	1.05947	0.9312	0.08995
orf19.1253	ORF19.1253	PHO4	Protein required for growth in medium lacking phosphate and for resistance to copper and Phloxine B; transcriptionally activated by Mnl1p under weak acid stress	-1.04949	-0.45994	0.48316
orf19.1253_RC	ORF19.1253	PHO4	Protein required for growth in medium lacking phosphate and for resistance to copper and Phloxine B; transcriptionally activated by Mnl1p under weak acid stress	-1.02158	-0.11901	0.66095
orf19.1259	ORF19.1259	ORF19.1259	Ortholog(s) have DNA binding activity and Lid2 complex, Snt2C complex, spindle pole body localization	1.02054	0.42436	0.35452
orf19.1259_RC	ORF19.1259	ORF19.1259	Ortholog(s) have DNA binding activity and Lid2 complex, Snt2C complex, spindle pole body localization	-1.07518	-0.8414	0.35046
orf19.1275	ORF19.1275	GAT1	Zinc finger transcriptional regulator of nitrogen utilization; required for nitrogen catabolite repression and utilization of isoleucine, tyrosine and tryptophan N sources; required for virulence in a mouse systemic infection model	1.01296	-0.2946	0.39832
orf19.1275_RC	ORF19.1275	GAT1	Zinc finger transcriptional regulator of nitrogen utilization; required for nitrogen catabolite repression and utilization of isoleucine, tyrosine and tryptophan N sources; required for virulence in a mouse systemic infection model	1.18326	0.8961
orf19.1283	ORF19.1283	MEC1	Cell cycle checkpoint protein with a role in genome integrity; RNA abundance regulated by tyrosol and cell density	-1.01742	-0.0502	0.82887
orf19.1283_RC	ORF19.1283	MEC1	Cell cycle checkpoint protein with a role in genome integrity; RNA abundance regulated by tyrosol and cell density	1.00762	0.27796	0.8962
orf19.130	ORF19.130	ORF19.130	Ortholog(s) have protein serine/threonine kinase activity, ubiquitin binding activity	-1.01107	0.03246	0.72478
orf19.130_RC	ORF19.130	ORF19.130	Ortholog(s) have protein serine/threonine kinase activity, ubiquitin binding activity	1.03404	0.61965	0.71195
orf19.1314	ORF19.1314	ORF19.1314	Planktonic growth-induced gene	-1.07268	-0.70868	0.26549
orf19.1314_RC	ORF19.1314	ORF19.1314	Planktonic growth-induced gene	-1.06167	-0.73757	0.22721
orf19.1341	ORF19.1341	PRR2	Putative serine/threonine protein kinase; mutation confers resistance to 5-fluorocytosine (5-FC)	-1.09586	-0.96262	0.09916
orf19.1341_RC	ORF19.1341	PRR2	Putative serine/threonine protein kinase; mutation confers resistance to 5-fluorocytosine (5-FC)	-1.02757	-0.4804	0.5921
orf19.1401	ORF19.1401	EAP1	GPI-anchored cell wall adhesin; cell-cell adhesion, biofilm formation; Efg1p-regulated; mutant suppresses polystyrene or cell adhesion, filamentation, invasive growth defects of S. cerevisiae flo8 or flo11 mutant; biofilm-induced	1.10714	1.51351	0.1244
orf19.1401_RC	ORF19.1401	EAP1	GPI-anchored cell wall adhesin; cell-cell adhesion, biofilm formation; Efg1p-regulated; mutant suppresses polystyrene or cell adhesion, filamentation, invasive growth defects of S. cerevisiae flo8 or flo11 mutant; biofilm-induced	1.09233	1.34353	0.12638
orf19.1434	ORF19.1434	ORF19.1434	Ortholog(s) have protein kinase activator activity	-1.05184	-0.49317	0.21991
orf19.1434_RC	ORF19.1434	ORF19.1434	Ortholog(s) have protein kinase activator activity	-1.09371	-0.76157	0.08812
orf19.1468	ORF19.1468	ORF19.1468	Ortholog(s) have protein phosphatase type 2A regulator activity	-1.03629	-0.32474	0.5767
orf19.1468_RC	ORF19.1468	ORF19.1468	Ortholog(s) have protein phosphatase type 2A regulator activity	1.03013	0.1704	0.39879
orf19.1476	ORF19.1476	ORF19.1476	Ortholog(s) have mRNA (N6-adenosine)-methyltransferase activity and role in mRNA methylation, meiosis	-1.02536	-0.17263	0.64197
orf19.1476_RC	ORF19.1476	ORF19.1476	Ortholog(s) have mRNA (N6-adenosine)-methyltransferase activity and role in mRNA methylation, meiosis	1.02993	0.56599	0.5741
orf19.1490	ORF19.1490	MSB2	Adhesin-like protein; mucin family; cell wall damage sensor; N-terminal secretion signal; required for Cek1p phosphorylation in response to cell wall stress; Rim101p-repressed; activation releases extracellular domain into medium	1.19462	2.5252	0.09299
orf19.1490_RC	ORF19.1490	MSB2	Adhesin-like protein; mucin family; cell wall damage sensor; N-terminal secretion signal; required for Cek1p phosphorylation in response to cell wall stress; Rim101p-repressed; activation releases extracellular domain into medium	1.11176	1.5763	0.10758
orf19.1496	ORF19.1496	ORF19.1496	Putative transcription factor with zinc finger DNA-binding motif; Hap43p-repressed gene	-1.04735	-0.56802	0.48608
orf19.1496_RC	ORF19.1496	ORF19.1496	Putative transcription factor with zinc finger DNA-binding motif; Hap43p-repressed gene	1.02844	0.04273	0.66565
orf19.1499	ORF19.1499	CTF1	Putative zinc-finger transcription factor, similar to A. nidulans FarA and FarB; activates genes required for fatty acid degradation; induced by oleate; null mutant displays carbon source utilization defects and slightly reduced virulence	-1.00937	0.05469	0.18216
orf19.1499_RC	ORF19.1499	CTF1	Putative zinc-finger transcription factor, similar to A. nidulans FarA and FarB; activates genes required for fatty acid degradation; induced by oleate; null mutant displays carbon source utilization defects and slightly reduced virulence	1.04604	0.77195	0.13183
orf19.1542	ORF19.1542	HEX3	Protein similar to S. cerevisiae Hex3p, which is involved in DNA damage response; transposon mutation affects filamentous growth	-1.03751	-0.29224	0.04659
orf19.1542_RC	ORF19.1542	HEX3	Protein similar to S. cerevisiae Hex3p, which is involved in DNA damage response; transposon mutation affects filamentous growth	1.05875	0.51636	0.14779
orf19.1565	ORF19.1565	ORF19.1565	Putative transcription factor with zinc finger DNA-binding motif	-1.00019	0.17148	0.99613
orf19.1565_RC	ORF19.1565	ORF19.1565	Putative transcription factor with zinc finger DNA-binding motif	-1.02035	-0.12554	0.60427
orf19.1574	ORF19.1574	ORF19.1574	Predicted ORF in Assemblies 19, 20 and 21; possibly an essential gene, disruptants not obtained by UAU1 method	-1.09642	-0.8589	0.30089
orf19.1574_RC	ORF19.1574	ORF19.1574	Predicted ORF in Assemblies 19, 20 and 21; possibly an essential gene, disruptants not obtained by UAU1 method	1.08519	0.50909	0.24435
orf19.1576	ORF19.1576	ORF19.1576	Ortholog(s) have nuclear localization sequence binding, ubiquitin binding activity, role in response to ethanol and cytosol localization	1.03054	0.5284	0.67962
orf19.1576_RC	ORF19.1576	ORF19.1576	Ortholog(s) have nuclear localization sequence binding, ubiquitin binding activity, role in response to ethanol and cytosol localization	-1.0308	-0.22338	0.72996
orf19.1577	ORF19.1577	ORF19.1577	Has domain(s) with predicted sequence-specific DNA binding, sequence-specific DNA binding transcription factor activity, zinc ion binding activity and role in regulation of transcription, DNA-dependent	-1.2586	-1.96498	0.00026
orf19.1577_RC	ORF19.1577	ORF19.1577	Has domain(s) with predicted sequence-specific DNA binding, sequence-specific DNA binding transcription factor activity, zinc ion binding activity and role in regulation of transcription, DNA-dependent	-1.12368	-1.0708	0.00293
orf19.1589	ORF19.1589	ORF19.1589	Putative DNA-binding transcription factor	-1.02223	-0.11246	0.22686
orf19.1589_RC	ORF19.1589	ORF19.1589	Putative DNA-binding transcription factor	-1.05081	-0.47653	0.46773
orf19.1596	ORF19.1596	FGR28	Protein lacking an ortholog in S. cerevisiae; transposon mutation affects filamentous growth; possibly an essential gene, disruptants not obtained by UAU1 method	-1.02391	-0.17875	0.74736
orf19.1596_RC	ORF19.1596	FGR28	Protein lacking an ortholog in S. cerevisiae; transposon mutation affects filamentous growth; possibly an essential gene, disruptants not obtained by UAU1 method	1.03014	0.55415	0.277
orf19.1605	ORF19.1605	PMS1	Putative DNA mismatch repair factor; ortholog of S. cerevisiae PMS1 which is an ATP-binding protein involved in DNA mismatch repair	-1.10146	-1.02451	0.19015
orf19.1605_RC	ORF19.1605	PMS1	Putative DNA mismatch repair factor; ortholog of S. cerevisiae PMS1 which is an ATP-binding protein involved in DNA mismatch repair	-1.00606	0.08508	0.56162
orf19.1619	ORF19.1619	ORF19.1619	Putative kinase subunit of RNA polymerase II carboxy-terminal domain kinase I; possibly an essential gene, disruptants not obtained by UAU1 method	-1.11348	-1.00557	0.27165
orf19.1619_RC	ORF19.1619	ORF19.1619	Putative kinase subunit of RNA polymerase II carboxy-terminal domain kinase I; possibly an essential gene, disruptants not obtained by UAU1 method	-1.01993	-0.27029	0.10374
orf19.1622	ORF19.1622	YCG1	Putative condensin G	-1.01514	-0.07515	0.49624
orf19.1622_RC	ORF19.1622	YCG1	Putative condensin G	1.07687	0.60776	0.314
orf19.1636	ORF19.1636	STE50	Protein with sterile alpha motif (SAM) and Ras-associated domain (RAD); similar to S. cerevisiae Rad50p, which is involved in signal transduction via interaction with and regulation of MAPKKK	-1.05052	-0.47282	0.31539
orf19.1636_RC	ORF19.1636	STE50	Protein with sterile alpha motif (SAM) and Ras-associated domain (RAD); similar to S. cerevisiae Rad50p, which is involved in signal transduction via interaction with and regulation of MAPKKK	-1.01768	-0.05361	0.30152
orf19.1648	ORF19.1648	RAD50	Putative DNA double-strand break repair factor; involved in response to oxidative stress and drug resistance	1.01959	0.43385	0.12148
orf19.1648_RC	ORF19.1648	RAD50	Putative DNA double-strand break repair factor; involved in response to oxidative stress and drug resistance	-1.01139	0.0282	0.7672
orf19.166	ORF19.166	ASG1	Gal4p family zinc-finger transcription factor with similarity to S. cerevisiae Asg1p	1.04091	0.63398	0.35401
orf19.166_RC	ORF19.166	ASG1	Gal4p family zinc-finger transcription factor with similarity to S. cerevisiae Asg1p	-1.0496	-0.46126	0.50954
orf19.1671	ORF19.1671	UTR2	GPI anchored cell wall putative glycosidase; role in adhesion; required for hyphal growth on Spider (not serum) medium; chitin-binding, glycosyl hydrolase domains; induced during cell wall regeneration; mRNA detected in yeast-form cells	1.01139	0.32729	0.75902
orf19.1671_RC	ORF19.1671	UTR2	GPI anchored cell wall putative glycosidase; role in adhesion; required for hyphal growth on Spider (not serum) medium; chitin-binding, glycosyl hydrolase domains; induced during cell wall regeneration; mRNA detected in yeast-form cells	-1.00585	0.10072	0.90166
orf19.1673	ORF19.1673	PPT1	Putative serine/threonine phosphatase; transcriptionally regulated by iron; expression greater in high iron	-1.07905	-0.82655	0.56382
orf19.1673_RC	ORF19.1673	PPT1	Putative serine/threonine phosphatase; transcriptionally regulated by iron; expression greater in high iron	1.07123	1.08603	0.5551
orf19.1674	ORF19.1674	CDC53	Cullin, a scaffold subunit of the SCF ubiquitin-ligase complexes; depletion leads to increased filamentous growth and premature cell death	-1.1313	-1.45878	0.22648
orf19.1674_RC	ORF19.1674	CDC53	Cullin, a scaffold subunit of the SCF ubiquitin-ligase complexes; depletion leads to increased filamentous growth and premature cell death	1.00017	0.15548	0.99491
orf19.1683	ORF19.1683	PPH21	Putative protein phosphatase of the Type 2A-related family (serine/threonine-specific), similar to S. cerevisiae Pph21p; caspofungin repressed; possibly an essential gene, disruptants not obtained by UAU1 method	-1.0538	-0.51589	0.24146
orf19.1683_RC	ORF19.1683	PPH21	Putative protein phosphatase of the Type 2A-related family (serine/threonine-specific), similar to S. cerevisiae Pph21p; caspofungin repressed; possibly an essential gene, disruptants not obtained by UAU1 method	-1.02151	-0.10315	0.50428
orf19.1690	ORF19.1690	TOS1	Protein similar to alpha agglutinin anchor subunit; secreted; exogenously expressed protein is a substrate for Kex2p processing in vitro; fluconazole-induced; induced by alpha pheromone in SpiderM medium; Hap43p-induced	-1.04229	-0.40529	0.14951
orf19.1690_RC	ORF19.1690	TOS1	Protein similar to alpha agglutinin anchor subunit; secreted; exogenously expressed protein is a substrate for Kex2p processing in vitro; fluconazole-induced; induced by alpha pheromone in SpiderM medium; Hap43p-induced	-1.21764	-2.33704	0.21857
orf19.1699	ORF19.1699	BZZ1	Protein similar to S. cerevisiae Bzz1p, which is an SH3 domain protein involved in the regulation of actin polymerization	-1.06438	-0.62214	0.39637
orf19.1699_RC	ORF19.1699	BZZ1	Protein similar to S. cerevisiae Bzz1p, which is an SH3 domain protein involved in the regulation of actin polymerization	1.04891	0.79647	0.28072
orf19.1714	ORF19.1714	PGA44	Putative GPI-anchored protein	1.07669	1.12875	0.23915
orf19.1714_RC	ORF19.1714	PGA44	Putative GPI-anchored protein	1.05543	0.89264	0.10266
orf19.1718	ORF19.1718	ZCF8	Predicted zinc-finger protein; decreased transcription is observed upon fluphenazine treatment; required for yeast cell adherence to silicone substrate	1.02233	0.46929	0.80919
orf19.1718_RC	ORF19.1718	ZCF8	Predicted zinc-finger protein; decreased transcription is observed upon fluphenazine treatment; required for yeast cell adherence to silicone substrate	-1.02108	-0.09762	0.80756
orf19.1729	ORF19.1729	ORF19.1729	Putative transcription factor with zinc finger DNA-binding motif	-1.01287	0.009	0.63305
orf19.1729_RC	ORF19.1729	ORF19.1729	Putative transcription factor with zinc finger DNA-binding motif	-1.07593	-0.78836	0.45644
orf19.173	ORF19.173	ORF19.173	Putative transcription factor with zinc finger DNA-binding motif; transcriptionally activated by Mnl1p under weak acid stress	-1.04413	-0.39223	0.50888
orf19.173_RC	ORF19.173	ORF19.173	Putative transcription factor with zinc finger DNA-binding motif; transcriptionally activated by Mnl1p under weak acid stress	1.06671	1.0303	0.53594
orf19.175	ORF19.175	ORF19.175	Ortholog of C. parapsilosis CDC317 : CPAR2_802450, Candida tenuis NRRL Y-1498 : CANTEDRAFT_113969, Debaryomyces hansenii CBS767 : DEHA2A13002g and Candida dubliniensis CD36 : CD36_27430	-1.09829	-0.89487	0.22255
orf19.175_RC	ORF19.175	ORF19.175	Ortholog of C. parapsilosis CDC317 : CPAR2_802450, Candida tenuis NRRL Y-1498 : CANTEDRAFT_113969, Debaryomyces hansenii CBS767 : DEHA2A13002g and Candida dubliniensis CD36 : CD36_27430	-1.08537	-0.89945	0.13737
orf19.1754	ORF19.1754	ORF19.1754	Putative calmodulin-dependent protein kinase; possibly an essential gene, disruptants not obtained by UAU1 method	1.02657	0.09499	0.48307
orf19.1754_RC	ORF19.1754	ORF19.1754	Putative calmodulin-dependent protein kinase; possibly an essential gene, disruptants not obtained by UAU1 method	-1.03762	-0.24812	0.22308
orf19.1757	ORF19.1757	ORF19.1757	Putative transcription factor with zinc finger DNA-binding motif; transcription is upregulated in clinical isolates from HIV+ patients with oral candidiasis	-1.09252	-0.99035	0.04411
orf19.1757_RC	ORF19.1757	ORF19.1757	Putative transcription factor with zinc finger DNA-binding motif; transcription is upregulated in clinical isolates from HIV+ patients with oral candidiasis	1.00393	0.17783	0.21487
orf19.1759	ORF19.1759	PHO23	Ortholog(s) have methylated histone residue binding activity	-1.08233	-0.7643	0.29727
orf19.1759_RC	ORF19.1759	PHO23	Ortholog(s) have methylated histone residue binding activity	-1.0894	-0.8702	0.26935
orf19.1760	ORF19.1760	RAS1	RAS signal transduction GTPase; regulates cAMP and MAP kinase pathways; role in hyphal induction, virulence, apoptosis, heat-shock sensitivity; nonessential; plasma membrane-localized; complements viability of S. cerevisiae ras1 ras2 mutant	-1.02821	-0.18946	0.26097
orf19.1760_RC	ORF19.1760	RAS1	RAS signal transduction GTPase; regulates cAMP and MAP kinase pathways; role in hyphal induction, virulence, apoptosis, heat-shock sensitivity; nonessential; plasma membrane-localized; complements viability of S. cerevisiae ras1 ras2 mutant	1.01612	0.38888	0.667
orf19.1762	ORF19.1762	OCA1	Putative protein phosphatase of the PTP family (tyrosine-specific), similar to S. cerevisiae Oca1p; mutant shows virulence defect; not essential for viability	1.02184	0.17708	0.51023
orf19.1762_RC	ORF19.1762	OCA1	Putative protein phosphatase of the PTP family (tyrosine-specific), similar to S. cerevisiae Oca1p; mutant shows virulence defect; not essential for viability	1.02189	0.16119	0.32276
orf19.1769	ORF19.1769	ORF19.1769	Ortholog(s) have G-protein beta/gamma-subunit complex binding, actin binding activity, role in positive regulation of transcription from RNA polymerase II promoter by pheromones, protein folding and cytoplasm localization	-1.05335	-0.50835	0.06783
orf19.1769_RC	ORF19.1769	ORF19.1769	Ortholog(s) have G-protein beta/gamma-subunit complex binding, actin binding activity, role in positive regulation of transcription from RNA polymerase II promoter by pheromones, protein folding and cytoplasm localization	-1.03191	-0.24342	0.23957
orf19.1777	ORF19.1777	ORF19.1777	Ortholog(s) have ubiquitin-specific protease activity, role in endocytosis, protein deubiquitination, regulation of protein kinase activity and cell division site, cytosol, nucleus, peroxisome, transport vesicle localization	-1.04548	-0.40934	0.73173
orf19.1777_RC	ORF19.1777	ORF19.1777	Ortholog(s) have ubiquitin-specific protease activity, role in endocytosis, protein deubiquitination, regulation of protein kinase activity and cell division site, cytosol, nucleus, peroxisome, transport vesicle localization	-1.00604	0.09833	0.91697
orf19.1815	ORF19.1815	ORF19.1815	Ortholog(s) have ribosomal large subunit binding activity	-1.08154	-0.85702	0.49087
orf19.1815_RC	ORF19.1815	ORF19.1815	Ortholog(s) have ribosomal large subunit binding activity	1.00526	0.24708	0.92881
orf19.1822	ORF19.1822	UME6	Zinc cluster DNA-binding transcription factor required for wild-type hyphal extension, virulence, adherence to plastic; filament induced; regulated by Nrg1p, Tup1p, Rfg1p, alkaline conditions; expression promotes highly filamentous biofilms	-1.09297	-0.77584	0.2746
orf19.1822_RC	ORF19.1822	UME6	Zinc cluster DNA-binding transcription factor required for wild-type hyphal extension, virulence, adherence to plastic; filament induced; regulated by Nrg1p, Tup1p, Rfg1p, alkaline conditions; expression promotes highly filamentous biofilms	-1.00045	0.12095	0.98661
orf19.1824	ORF19.1824	PGA50	Putative GPI-anchored protein; adhesin-like protein	1.07776	1.09372	0.26093
orf19.1824_RC	ORF19.1824	PGA50	Putative GPI-anchored protein; adhesin-like protein	-1.02344	-0.16386	0.48812
orf19.1826	ORF19.1826	MDM34	Putative transcription factor with zinc finger DNA-binding motif; macrophage-downregulated gene; biofilm-induced	-1.03237	-0.22434	0.50015
orf19.1826_RC	ORF19.1826	MDM34	Putative transcription factor with zinc finger DNA-binding motif; macrophage-downregulated gene; biofilm-induced	-1.0367	-0.31177	0.4764
orf19.1842	ORF19.1842	BUD5	Predicted GTP/GDP exchange factor for Rsr1p	1.07129	1.08684	0.1141
orf19.1842_RC	ORF19.1842	BUD5	Predicted GTP/GDP exchange factor for Rsr1p	-1.0053	0.108	0.96028
orf19.1850	ORF19.1850	SIW14	Putative protein phosphatase of the PTP family (tyrosine-specific), similar to S. cerevisiae Siw14p; mutant shows virulence defect; Hap43p-repressed gene	1.19703	0.99018
orf19.1850_RC	ORF19.1850	SIW14	Putative protein phosphatase of the PTP family (tyrosine-specific), similar to S. cerevisiae Siw14p; mutant shows virulence defect; Hap43p-repressed gene	1.02703	-0.11816	0.7975
orf19.1901	ORF19.1901	MCM3	Putative DNA replication protein; periodic mRNA expression, peak at cell-cycle M/G1 phase	-1.20187	-1.75932	0.07476
orf19.1901_RC	ORF19.1901	MCM3	Putative DNA replication protein; periodic mRNA expression, peak at cell-cycle M/G1 phase	1.0016	-0.36398	0.97946
orf19.1911	ORF19.1911	PGA52	GPI-anchored cell surface protein of unknown function; Hap43p-repressed gene; fluconazole-induced; possibly an essential gene, disruptants not obtained by UAU1 method	1.11216	1.47253	0.13008
orf19.1911_RC	ORF19.1911	PGA52	GPI-anchored cell surface protein of unknown function; Hap43p-repressed gene; fluconazole-induced; possibly an essential gene, disruptants not obtained by UAU1 method	-1.01971	-0.09273	0.72472
orf19.1936	ORF19.1936	SNF1	Essential protein; functional homolog of S. cerevisiae Snf1p regulator of sugar metabolism; constitutively expressed; Thr208 phosphorylation may have regulatory role; up-regulation associated with azole resistance; has polyhistidine tract	-1.0989	-0.78629	0.06878
orf19.1936_RC	ORF19.1936	SNF1	Essential protein; functional homolog of S. cerevisiae Snf1p regulator of sugar metabolism; constitutively expressed; Thr208 phosphorylation may have regulatory role; up-regulation associated with azole resistance; has polyhistidine tract	1.03656	0.41395	0.12525
orf19.1943	ORF19.1943	ORF19.1943	Ortholog of C. parapsilosis CDC317 : CPAR2_302610, Candida dubliniensis CD36 : CD36_51070, Candida orthopsilosis Co 90-125 : CORT0E04770 and Spathaspora passalidarum NRRL Y-27907 : SPAPADRAFT_50634	1.03754	0.66642	0.45223
orf19.1943_RC	ORF19.1943	ORF19.1943	Ortholog of C. parapsilosis CDC317 : CPAR2_302610, Candida dubliniensis CD36 : CD36_51070, Candida orthopsilosis Co 90-125 : CORT0E04770 and Spathaspora passalidarum NRRL Y-27907 : SPAPADRAFT_50634	1.11618	1.52088	0.24867
orf19.1944	ORF19.1944	GPR1	Plasma membrane G-protein-coupled receptor of the cAMP-PKA pathway; required for wild-type hyphal growth; reports differ on role in cAMP-mediated glucose signaling; Gpr1p C terminus binds Gpa2p; regulates HWP1 and ECE1; biofilm-induced	1.15335	0.70413	0.44308
orf19.1944_RC	ORF19.1944	GPR1	Plasma membrane G-protein-coupled receptor of the cAMP-PKA pathway; required for wild-type hyphal growth; reports differ on role in cAMP-mediated glucose signaling; Gpr1p C terminus binds Gpa2p; regulates HWP1 and ECE1; biofilm-induced	1.03669	-0.11642	0.25386
orf19.1949	ORF19.1949	VPS1	Dynamin-family GTPase-related protein; induced upon adherence to polystyrene; regulated by Gcn2p and Gcn4p	-1.09651	-1.10263	0.45167
orf19.1949_RC	ORF19.1949	VPS1	Dynamin-family GTPase-related protein; induced upon adherence to polystyrene; regulated by Gcn2p and Gcn4p	1.03573	-0.12354
orf19.1956	ORF19.1956	ORF19.1956	Ortholog(s) have role in reciprocal meiotic recombination and mitochondrion localization	1.04619	0.77533	0.36399
orf19.1956_RC	ORF19.1956	ORF19.1956	Ortholog(s) have role in reciprocal meiotic recombination and mitochondrion localization	1.07558	1.14745	0.29463
orf19.1960	ORF19.1960	CLN3	G1 cyclin; depletion abolishes budding and causes hyphal growth defects; farnesol regulated, upregulated in biofilm; functional in S. cerevisiae; possibly essential gene, disruptants not obtained by UAU1 method	-1.01435	-0.03607	0.72705
orf19.1960_RC	ORF19.1960	CLN3	G1 cyclin; depletion abolishes budding and causes hyphal growth defects; farnesol regulated, upregulated in biofilm; functional in S. cerevisiae; possibly essential gene, disruptants not obtained by UAU1 method	1.05723	0.4402	0.37831
orf19.1971	ORF19.1971	TRY3	Transcriptional regulator of yeast form adherence; required for yeast cell adherence to silicone substrate	-1.14264	-1.26962	0.26078
orf19.1971_RC	ORF19.1971	TRY3	Transcriptional regulator of yeast form adherence; required for yeast cell adherence to silicone substrate	-1.13894	-1.2886	0.30041
orf19.1985	ORF19.1985	ORF19.1985	Biofilm-induced gene	-1.05094	-0.47816	0.43547
orf19.1985_RC	ORF19.1985	ORF19.1985	Biofilm-induced gene	1.12052	1.59004	0.10408
orf19.1989	ORF19.1989	DCW1	Protein with predicted GPI modification; dfg5 dcw1 double mutant is inviable; not required for wild-type hyphal growth; increased mRNA abundance observed in cyr1 null mutant (yeast-form or hyphal); fungal-specific; Hap43p-induced	1.01247	0.2849	0.39847
orf19.1989_RC	ORF19.1989	DCW1	Protein with predicted GPI modification; dfg5 dcw1 double mutant is inviable; not required for wild-type hyphal growth; increased mRNA abundance observed in cyr1 null mutant (yeast-form or hyphal); fungal-specific; Hap43p-induced	1.00324	0.18276	0.8595
orf19.20	ORF19.20	RTS1	Putative serine/threonine-protein phosphatase B-type regulatory subunit; transcription is regulated upon yeast-hyphal switch	1.00454	0.23754	0.41342
orf19.20_RC	ORF19.20	RTS1	Putative serine/threonine-protein phosphatase B-type regulatory subunit; transcription is regulated upon yeast-hyphal switch	-1.03189	-0.26686	0.08978
orf19.2014	ORF19.2014	BCY1	Protein kinase A regulatory subunit; required for nuclear localization of Tpk1p; physically interacts with Tpk1p; essential; apoptosis-regulated; bcy1 heterozygous or bcy1 tpk2 mutant has filamentous growth defect; planktonic growth-induced	-1.00428	0.09965	0.11538
orf19.2014_RC	ORF19.2014	BCY1	Protein kinase A regulatory subunit; required for nuclear localization of Tpk1p; physically interacts with Tpk1p; essential; apoptosis-regulated; bcy1 heterozygous or bcy1 tpk2 mutant has filamentous growth defect; planktonic growth-induced	1.01465	0.36982	0.84906
orf19.2033	ORF19.2033	PGA19	Putative GPI-anchored protein; not essential for viability; macrophage-induced gene	1.08763	1.27554	0.31255
orf19.2033_RC	ORF19.2033	PGA19	Putative GPI-anchored protein; not essential for viability; macrophage-induced gene	1.11199	1.60922	0.31738
orf19.2044	ORF19.2044	PGA27	Putative GPI-anchored protein	1.03514	0.63362	0.47298
orf19.2044_RC	ORF19.2044	PGA27	Putative GPI-anchored protein	1.04531	0.69616	0.55477
orf19.2054	ORF19.2054	FGR15	Putative transcription factor with zinc finger DNA-binding motif; lacks an ortholog in S. cerevisiae; transposon mutation affects filamentous growth; caspofungin induced; mutation causes marginal increase in caspofungin sensitivity	-1.14127	-1.21312	0.28038
orf19.2054_RC	ORF19.2054	FGR15	Putative transcription factor with zinc finger DNA-binding motif; lacks an ortholog in S. cerevisiae; transposon mutation affects filamentous growth; caspofungin induced; mutation causes marginal increase in caspofungin sensitivity	-1.01322	-0.01385	0.53585
orf19.2060	ORF19.2060	SOD5	Copper- and zinc-containing superoxide dismutase; protective against oxidative stress; induced by neutrophils, hyphal growth, caspofungin, osmotic, oxidative stress; gene family includes SOD1,4,5,6; induced in oralpharyngeal candidiasis	1.02908	0.53737	0.75302
orf19.2060_RC	ORF19.2060	SOD5	Copper- and zinc-containing superoxide dismutase; protective against oxidative stress; induced by neutrophils, hyphal growth, caspofungin, osmotic, oxidative stress; gene family includes SOD1,4,5,6; induced in oralpharyngeal candidiasis	1.06386	0.98232	0.20211
orf19.2062	ORF19.2062	SOD4	Copper- and zinc-containing superoxide dismutase; role in response to host innate immune ROS; regulated on white-opaque switching; ciclopirox olamine induced; caspofungin repressed; family includes SOD1, SOD4, SOD5, SOD6; yeast-associated	1.0138	0.33443	0.82104
orf19.2062_RC	ORF19.2062	SOD4	Copper- and zinc-containing superoxide dismutase; role in response to host innate immune ROS; regulated on white-opaque switching; ciclopirox olamine induced; caspofungin repressed; family includes SOD1, SOD4, SOD5, SOD6; yeast-associated	-1.02765	-0.21747	0.43449
orf19.207	ORF19.207	PGA55	Putative GPI-anchored protein; adhesin-like protein; filament induced; regulated by Nrg1p, Tup1p; possibly transcriptionally regulated upon hyphal formation; mRNA binds to She3p and is localized to buds of yeast-form cells and hyphal tips	-1.00717	0.08341	0.69674
orf19.207_RC	ORF19.207	PGA55	Putative GPI-anchored protein; adhesin-like protein; filament induced; regulated by Nrg1p, Tup1p; possibly transcriptionally regulated upon hyphal formation; mRNA binds to She3p and is localized to buds of yeast-form cells and hyphal tips	1.00995	0.30851	0.8873
orf19.2084	ORF19.2084	CDH1	Protein involved in regulation of mitosis, similar to S. cerevisiae Cdh1p, which is an APC/C component; transcriptionally activated by Mnl1p under weak acid stress	-1.06021	-0.69134	0.33115
orf19.2084_RC	ORF19.2084	CDH1	Protein involved in regulation of mitosis, similar to S. cerevisiae Cdh1p, which is an APC/C component; transcriptionally activated by Mnl1p under weak acid stress	-1.09281	-0.96099	0.42251
orf19.2093	ORF19.2093	RFA1	Putative DNA replication factor A; RNA abundance regulated by cell cycle, tyrosol and cell density	-1.07886	-0.85133	0.12438
orf19.2093_RC	ORF19.2093	RFA1	Putative DNA replication factor A; RNA abundance regulated by cell cycle, tyrosol and cell density	1.02471	0.48442	0.09281
orf19.2097	ORF19.2097	ORF19.2097	Ortholog(s) have DNA-dependent ATPase activity, Y-form DNA binding, four-way junction DNA binding, four-way junction helicase activity	1.05491	0.4676	0.60655
orf19.2097_RC	ORF19.2097	ORF19.2097	Ortholog(s) have DNA-dependent ATPase activity, Y-form DNA binding, four-way junction DNA binding, four-way junction helicase activity	1.06173	0.64046	0.04091
orf19.2102	ORF19.2102	CKB1	Regulatory subunit of protein kinase CK2 (casein kinase II), beta subunit; null mutants are hypersensitive to caspofungin and hydrogen peroxide medium	-1.03334	-0.2552	0.25228
orf19.2102_RC	ORF19.2102	CKB1	Regulatory subunit of protein kinase CK2 (casein kinase II), beta subunit; null mutants are hypersensitive to caspofungin and hydrogen peroxide medium	1.11676	1.65262	0.23654
orf19.2105	ORF19.2105	ORF19.2105	Putative pre-mRNA-splicing factor; possibly an essential gene, disruptants not obtained by UAU1 method	-1.00688	0.08729	0.9259
orf19.2105_RC	ORF19.2105	ORF19.2105	Putative pre-mRNA-splicing factor; possibly an essential gene, disruptants not obtained by UAU1 method	-1.13229	-1.46863	0.04887
orf19.2108	ORF19.2108	SOD6	Copper- and zinc-containing superoxide dismutase; expression regulated during planktonic growth; member of a gene family that includes SOD1, SOD4, SOD5, and SOD6; gene may contain an intron; Hap43p-repressed; biofilm-induced	1.07286	1.03995	0.04673
orf19.2108_RC	ORF19.2108	SOD6	Copper- and zinc-containing superoxide dismutase; expression regulated during planktonic growth; member of a gene family that includes SOD1, SOD4, SOD5, and SOD6; gene may contain an intron; Hap43p-repressed; biofilm-induced	-1.03048	-0.2432	0.84623
orf19.217	ORF19.217	ORF19.217	Ortholog(s) have sequence-specific DNA binding activity	1.0244	0.03587	0.16193
orf19.217_RC	ORF19.217	ORF19.217	Ortholog(s) have sequence-specific DNA binding activity	-1.00555	-0.20727	0.83903
orf19.220	ORF19.220	PIR1	1,3-beta-glucan-linked structural cell wall protein; N-mannosylated, O-glycosylated by Pmt1p; tandem repeats; cell wall defect in heterozygous mutant; hyphal repressed; Hog1p, fluconazole, hypoxia induced; iron, Efg1p, Plc1p, temp regulated	1.05171	0.85707	0.69082
orf19.220_RC	ORF19.220	PIR1	1,3-beta-glucan-linked structural cell wall protein; N-mannosylated, O-glycosylated by Pmt1p; tandem repeats; cell wall defect in heterozygous mutant; hyphal repressed; Hog1p, fluconazole, hypoxia induced; iron, Efg1p, Plc1p, temp regulated	-1.01662	-0.04625	0.73669
orf19.2204.2	ORF19.2204.2	ORF19.2204.2	Ortholog(s) have GTPase activity and role in establishment or maintenance of actin cytoskeleton polarity, regulation of alpha-glucan biosynthetic process	-1.0617	-0.59506	0.32196
orf19.2204.2_RC	ORF19.2204.2	ORF19.2204.2	Ortholog(s) have GTPase activity and role in establishment or maintenance of actin cytoskeleton polarity, regulation of alpha-glucan biosynthetic process	1.07629	0.58297	0.04336
orf19.2222	ORF19.2222	ORF19.2222	Putative casein kinase; plasma membrane-localized	-1.04997	-0.46586	0.52026
orf19.2222_RC	ORF19.2222	ORF19.2222	Putative casein kinase; plasma membrane-localized	1.02293	0.47701	0.52169
orf19.223	ORF19.223	ORF19.223	Putative serine/threonine protein kinase; Hap43p-repressed gene; increased expression in response to prostaglandins; late-stage biofilm-induced; possibly an essential gene, disruptants not obtained by UAU1 method	-1.05789	-0.58504	0.40207
orf19.223_RC	ORF19.223	ORF19.223	Putative serine/threonine protein kinase; Hap43p-repressed gene; increased expression in response to prostaglandins; late-stage biofilm-induced; possibly an essential gene, disruptants not obtained by UAU1 method	-1.05582	-0.54239	0.28664
orf19.2236	ORF19.2236	FHL1	Transcription factor that forms a heterodimer with Ifh1p that is tethered to promoters by Tbf1p; positively regulates rRNA and ribosomal protein gene transcription	-1.12962	-1.43114	0.3433
orf19.2236_RC	ORF19.2236	FHL1	Transcription factor that forms a heterodimer with Ifh1p that is tethered to promoters by Tbf1p; positively regulates rRNA and ribosomal protein gene transcription	-1.04487	-0.40274	0.07433
orf19.2237	ORF19.2237	SPR1	Putative GPI-anchored protein; not essential for viability; similar to S. cerevisiae Spr1p, which is a sporulation-specific exo-1,3-beta-glucanase	1.0424	0.72593	0.48462
orf19.2237_RC	ORF19.2237	SPR1	Putative GPI-anchored protein; not essential for viability; similar to S. cerevisiae Spr1p, which is a sporulation-specific exo-1,3-beta-glucanase	1.00448	0.23683	0.96832
orf19.2267	ORF19.2267	RFA2	Putative DNA replication factor A; RNA abundance regulated by cell cycle, tyrosol and cell density	1.34551	2.07357	0.5621
orf19.2267_RC	ORF19.2267	RFA2	Putative DNA replication factor A; RNA abundance regulated by cell cycle, tyrosol and cell density	1.18471	0.9059	0.06388
orf19.2268	ORF19.2268	RCK2	Predicted MAP kinase-activated protein kinase, similar to S. cerevisiae serine/threonine protein kinase Rck2p; induced by osmotic stress via Hog1p; macrophage/pseudohyphal-repressed; mutants are sensitive to rapamycin	1.01224	0.18921	0.09521
orf19.2268_RC	ORF19.2268	RCK2	Predicted MAP kinase-activated protein kinase, similar to S. cerevisiae serine/threonine protein kinase Rck2p; induced by osmotic stress via Hog1p; macrophage/pseudohyphal-repressed; mutants are sensitive to rapamycin	-1.01655	-0.21929	0.71842
orf19.2277	ORF19.2277	TPK2	Catalytic subunit of cAMP-dependent protein kinase (PKA), isoform of Tpk1p; required for wild-type epithelial cell damage and engulfment and oral (not systemic) virulence in mouse; involved in control of morphogenesis and stress response	-1.05671	-0.56486	0.02253
orf19.2277_RC	ORF19.2277	TPK2	Catalytic subunit of cAMP-dependent protein kinase (PKA), isoform of Tpk1p; required for wild-type epithelial cell damage and engulfment and oral (not systemic) virulence in mouse; involved in control of morphogenesis and stress response	-1.02665	-0.21339	0.18285
orf19.2280	ORF19.2280	ZCF10	Putative transcription factor with zinc cluster DNA-binding motif	-1.133	-1.47055	0.38611
orf19.2280_RC	ORF19.2280	ZCF10	Putative transcription factor with zinc cluster DNA-binding motif	-1.1446	-1.60509	0.32271
orf19.229	ORF19.229	ORF19.229	Ortholog(s) have ubiquitin-protein ligase activity, role in protein ubiquitination involved in ubiquitin-dependent protein catabolic process and chromosome, centromeric region, nucleus, spindle pole body localization	1.18452	0.90933	0.66157
orf19.229_RC	ORF19.229	ORF19.229	Ortholog(s) have ubiquitin-protein ligase activity, role in protein ubiquitination involved in ubiquitin-dependent protein catabolic process and chromosome, centromeric region, nucleus, spindle pole body localization	1.17699	1.01298	0.24518
orf19.2320	ORF19.2320	ORF19.2320	Putative serine/threonine-protein kinase; possibly an essential gene, disruptants not obtained by UAU1 method	-1.10204	-0.92523	0.14181
orf19.2320_RC	ORF19.2320	ORF19.2320	Putative serine/threonine-protein kinase; possibly an essential gene, disruptants not obtained by UAU1 method	-1.04336	-0.54996	0.48924
orf19.2324	ORF19.2324	UBA4	Putative ubiquitin activating protein; Hap43p-repressed gene; increased expression in response to prostaglandins; clade-associated gene expression	-1.00822	-0.11487	0.40574
orf19.2324_RC	ORF19.2324	UBA4	Putative ubiquitin activating protein; Hap43p-repressed gene; increased expression in response to prostaglandins; clade-associated gene expression	-1.13018	-1.22503	0.27963
orf19.233.1	ORF19.233.1	HRT1	Protein similar to S. cerevisiae Hrt1p, which is a component of a nuclear ubiquitin-protein ligase complex involved in cell cycle control; induced under hydroxyurea treatment	1.00106	-0.17219	0.94697
orf19.233.1_RC	ORF19.233.1	HRT1	Protein similar to S. cerevisiae Hrt1p, which is a component of a nuclear ubiquitin-protein ligase complex involved in cell cycle control; induced under hydroxyurea treatment	-1.10735	-1.07014	0.028
orf19.2331	ORF19.2331	ADA2	Zinc finger transcriptional coactivator with a role in cell wall integrity and in sensitivity to caspofungin; required for the normal transcriptional response to caspofungin; required for yeast cell adherence to silicone substrate	-1.00714	0.08115	0.75862
orf19.2331_RC	ORF19.2331	ADA2	Zinc finger transcriptional coactivator with a role in cell wall integrity and in sensitivity to caspofungin; required for the normal transcriptional response to caspofungin; required for yeast cell adherence to silicone substrate	1.02641	0.52619	0.6181
orf19.2356	ORF19.2356	CRZ2	Zinc finger transcription factor; crz1 not crz2 null mutation suppresses fluconazole resistance of homozygous cka2 null (CK2 kinase defective); Rim101p-downregulated at pH 8; required for yeast cell adherence to silicone substrate	-1.02171	-0.17218	0.55676
orf19.2356_RC	ORF19.2356	CRZ2	Zinc finger transcription factor; crz1 not crz2 null mutation suppresses fluconazole resistance of homozygous cka2 null (CK2 kinase defective); Rim101p-downregulated at pH 8; required for yeast cell adherence to silicone substrate	-1.07868	-0.77564	0.03245
orf19.2379	ORF19.2379	NOT4	Putative E3 ubiquitin-protein ligase; required for maintenance, but not induction, of hyphal development; homozygous null mutant is avirulent in mouse systemic infection despite persistence in host; repressed in rat oral candidiasis	-1.18488	-2.06156	0.06636
orf19.2379_RC	ORF19.2379	NOT4	Putative E3 ubiquitin-protein ligase; required for maintenance, but not induction, of hyphal development; homozygous null mutant is avirulent in mouse systemic infection despite persistence in host; repressed in rat oral candidiasis	-1.0764	-0.73852	0.09207
orf19.239	ORF19.239	ORF19.239	Putative ATP-dependent helicase; induced by nitric oxide	-1.08139	-0.6346	0.17514
orf19.239_RC	ORF19.239	ORF19.239	Putative ATP-dependent helicase; induced by nitric oxide	1.00787	0.08762	0.61347
orf19.2393	ORF19.2393	ORF19.2393	Putative transcription factor with zinc finger DNA-binding motif	1.15531	0.74415	0.19393
orf19.2393_RC	ORF19.2393	ORF19.2393	Putative transcription factor with zinc finger DNA-binding motif	-1.04345	-0.72102	0.73052
orf19.2395	ORF19.2395	IME2	Putative serine/threonine protein kinase; mutation confers hypersensitivity to amphotericin B	-1.01025	0.04311	0.21686
orf19.2395_RC	ORF19.2395	IME2	Putative serine/threonine protein kinase; mutation confers hypersensitivity to amphotericin B	1.0295	0.56149	0.12783
orf19.2399	ORF19.2399	ORF19.2399	Putative transcription factor with zinc finger DNA-binding motif; similar to bacterial DnaJ; transcriptionally regulated by iron; expression greater in low iron	-1.00019	0.17524	0.96563
orf19.2399_RC	ORF19.2399	ORF19.2399	Putative transcription factor with zinc finger DNA-binding motif; similar to bacterial DnaJ; transcriptionally regulated by iron; expression greater in low iron	-1.02705	-0.17456	0.32595
orf19.2417	ORF19.2417	SMC5	Protein similar to S. cerevisiae Smc5p, which is involved in DNA repair; transposon mutation affects filamentous growth	-1.0236	-0.22081	0.25831
orf19.2417_RC	ORF19.2417	SMC5	Protein similar to S. cerevisiae Smc5p, which is involved in DNA repair; transposon mutation affects filamentous growth	1.01684	0.11818	0.05602
orf19.2423	ORF19.2423	ZCF11	Putative DNA-binding transcription factor with a zinc cluster domain, required for wild-type filamentous growth; mRNA binds to She3p	1.12553	0.51699	0.11765
orf19.2423_RC	ORF19.2423	ZCF11	Putative DNA-binding transcription factor with a zinc cluster domain, required for wild-type filamentous growth; mRNA binds to She3p	1.15892	0.74124	0.18616
orf19.2429	ORF19.2429	ORF19.2429	Predicted ORF in Assemblies 19, 20 and 21; transcription is induced in response to alpha pheromone in SpiderM medium	-1.11598	-1.27771	0.07876
orf19.2429_RC	ORF19.2429	ORF19.2429	Predicted ORF in Assemblies 19, 20 and 21; transcription is induced in response to alpha pheromone in SpiderM medium	1.01573	0.37491	0.85941
orf19.2432	ORF19.2432	HAC1	Putative bZIP transcription factor involved in unfolded protein response and control of morphology; transcript undergoes atypical splicing at C terminus under ER stress; induced during mating and by caspofungin; mRNA binds She3p	-1.04676	-0.40003	0.60646
orf19.2432_RC	ORF19.2432	HAC1	Putative bZIP transcription factor involved in unfolded protein response and control of morphology; transcript undergoes atypical splicing at C terminus under ER stress; induced during mating and by caspofungin; mRNA binds She3p	1.0107	0.29838	0.87037
orf19.2447	ORF19.2447	ORF19.2447	Putative Type II phosphatidylinositol 4-kinase; expression downregulated in an ssr1 null mutant	-1.01241	-0.48864	0.75833
orf19.2447_RC	ORF19.2447	ORF19.2447	Putative Type II phosphatidylinositol 4-kinase; expression downregulated in an ssr1 null mutant	1.10877	0.4008	0.05259
orf19.2451	ORF19.2451	PGA45	Cell wall protein; putative GPI-anchor; downregulated in core caspofungin response; Hog1p-induced; regulated by Ssn6p; Mob2p-dependent hyphal regulation; biofilm-induced	1.03957	0.63368	0.58384
orf19.2451_RC	ORF19.2451	PGA45	Cell wall protein; putative GPI-anchor; downregulated in core caspofungin response; Hog1p-induced; regulated by Ssn6p; Mob2p-dependent hyphal regulation; biofilm-induced	1.04337	0.6743	0.07895
orf19.2458	ORF19.2458	ORF19.2458	Putative transcription factor with zinc finger DNA-binding motif; late-stage biofilm-induced	1.0114	0.32741	0.883
orf19.2458_RC	ORF19.2458	ORF19.2458	Putative transcription factor with zinc finger DNA-binding motif; late-stage biofilm-induced	-1.01686	-0.04289	0.4722
orf19.2475	ORF19.2475	PGA26	GPI-anchored adhesin-like protein of the cell wall, role in cell wall integrity; required for normal virulence; transcriptionally regulated by iron; expression greater in high iron; induced during cell wall regeneration; Hap43p-repressed	1.05726	0.91812	0.24938
orf19.2475_RC	ORF19.2475	PGA26	GPI-anchored adhesin-like protein of the cell wall, role in cell wall integrity; required for normal virulence; transcriptionally regulated by iron; expression greater in high iron; induced during cell wall regeneration; Hap43p-repressed	-1.0204	-0.10502	0.7948
orf19.2504	ORF19.2504	BMS1	Putative GTPase; Hap43p-induced gene; mutation confers resistance to 5-fluorocytosine (5-FC); flucytosine induced; decreased expression in response to prostaglandins	1.03297	0.57975	0.71821
orf19.2504_RC	ORF19.2504	BMS1	Putative GTPase; Hap43p-induced gene; mutation confers resistance to 5-fluorocytosine (5-FC); flucytosine induced; decreased expression in response to prostaglandins	1.05625	0.84244	0.14953
orf19.2519	ORF19.2519	ORF19.2519	Ortholog(s) have role in chromosome segregation and nuclear MIS12/MIND type complex localization	1.0766	1.0596	0.25155
orf19.2519_RC	ORF19.2519	ORF19.2519	Ortholog(s) have role in chromosome segregation and nuclear MIS12/MIND type complex localization	-1.00532	0.08628	0.93401
orf19.2528	ORF19.2528	ORF19.2528	Putative RNA polymerase III transcription factor (TFIIIB) subunit; flucytosine repressed	1.01187	0.3366	0.5793
orf19.2528_RC	ORF19.2528	ORF19.2528	Putative RNA polymerase III transcription factor (TFIIIB) subunit; flucytosine repressed	1.09378	1.37057	0.16989
orf19.2534	ORF19.2534	PIN4	Protein with similarity to S. cerevisiae Pin4p; transposon mutation affects filamentous growth	-1.32347	-3.52183	0.07134
orf19.2534_RC	ORF19.2534	PIN4	Protein with similarity to S. cerevisiae Pin4p; transposon mutation affects filamentous growth	-1.19227	-2.13811	0.10604
orf19.2538	ORF19.2538	PTC2	Protein phosphatase of the Type 2C-related family (serine/threonine-specific) with a potential role in DNA damage checkpoint control; localizes to both cytoplasm and mitochondria; mutant shows virulence defect	-1.13274	-1.46758	0.23035
orf19.2538_RC	ORF19.2538	PTC2	Protein phosphatase of the Type 2C-related family (serine/threonine-specific) with a potential role in DNA damage checkpoint control; localizes to both cytoplasm and mitochondria; mutant shows virulence defect	-1.11772	-1.29135	0.18243
orf19.2540	ORF19.2540	SAS3	Similar to silencing proteins; increased transcription is observed upon fluphenazine treatment	-1.08888	-0.94628	0.04383
orf19.2540_RC	ORF19.2540	SAS3	Similar to silencing proteins; increased transcription is observed upon fluphenazine treatment	-1.08994	-0.97437	0.28305
orf19.255	ORF19.255	ZCF1	Predicted zinc-cluster protein; possibly transcriptionally regulated upon hyphal formation; late-stage biofilm-induced; intron in 5'-UTR; mutants display decreased colonization of mouse kidneys	-1.10943	-0.9496	0.06265
orf19.255_RC	ORF19.255	ZCF1	Predicted zinc-cluster protein; possibly transcriptionally regulated upon hyphal formation; late-stage biofilm-induced; intron in 5'-UTR; mutants display decreased colonization of mouse kidneys	1.00041	-0.09485	0.99342
orf19.259	ORF19.259	ORF19.259	Late-stage biofilm-induced gene	-1.00404	-0.09688	0.679
orf19.259_RC	ORF19.259	ORF19.259	Late-stage biofilm-induced gene	-1.00355	0.05209	0.85142
orf19.2612	ORF19.2612	ORF19.2612	Putative zinc finger DNA-binding transcription factor; expression downregulated in an ssr1 null mutant; late-stage biofilm-induced gene	-1.01337	-0.04276	0.66924
orf19.2612_RC	ORF19.2612	ORF19.2612	Putative zinc finger DNA-binding transcription factor; expression downregulated in an ssr1 null mutant; late-stage biofilm-induced gene	-1.01707	-0.0443	0.83557
orf19.2614	ORF19.2614	RSR1	RAS-related protein; GTP/GDP cycling required for wild-type polar bud site selection, hyphal growth guidance; role in systemic virulence in mouse; geranylgeranylation predicted; suppresses S. cerevisiae cdc24-4 mutant heat sensitivity	1.02107	0.453	0.73099
orf19.2614_RC	ORF19.2614	RSR1	RAS-related protein; GTP/GDP cycling required for wild-type polar bud site selection, hyphal growth guidance; role in systemic virulence in mouse; geranylgeranylation predicted; suppresses S. cerevisiae cdc24-4 mutant heat sensitivity	-1.00175	0.15474	0.85936
orf19.2647	ORF19.2647	ZCF14	Putative transcription factor with zinc cluster DNA-binding motif; caspofungin induced	-1.03297	-0.29154	0.51852
orf19.2647_RC	ORF19.2647	ZCF14	Putative transcription factor with zinc cluster DNA-binding motif; caspofungin induced	1.13993	1.39644	0.3539
orf19.2649	ORF19.2649	PCL1	Cyclin homolog; expression induced upon filamentous growth; transcription is induced in response to alpha pheromone in SpiderM medium	1.00574	0.25328	0.77779
orf19.2649_RC	ORF19.2649	PCL1	Cyclin homolog; expression induced upon filamentous growth; transcription is induced in response to alpha pheromone in SpiderM medium	1.02932	0.49983	0.32235
orf19.2674	ORF19.2674	ORF19.2674	Putative transcription factor with zinc finger DNA-binding motif; Hap43p-repressed gene	-1.03236	-0.2034	0.15554
orf19.2674_RC	ORF19.2674	ORF19.2674	Putative transcription factor with zinc finger DNA-binding motif; Hap43p-repressed gene	1.00823	0.11779	0.52769
orf19.2678	ORF19.2678	BUB1	Putative cell cycle checkpoint kinase; mutation confers increased sensitivity to nocodazole	-1.05367	-0.54249	0.46988
orf19.2678_RC	ORF19.2678	BUB1	Putative cell cycle checkpoint kinase; mutation confers increased sensitivity to nocodazole	-1.03089	-0.23078	0.53473
orf19.2685	ORF19.2685	PGA54	Putative GPI-anchored protein; hyphal induced; Hog1p-downregulated; induced in a cyr1 or efg1 homozygous null mutant; shows colony morphology-related gene regulation by Ssn6p; upregulated in an RHE model; mRNA binds to She3p	1.0426	0.68019	0.06028
orf19.2685_RC	ORF19.2685	PGA54	Putative GPI-anchored protein; hyphal induced; Hog1p-downregulated; induced in a cyr1 or efg1 homozygous null mutant; shows colony morphology-related gene regulation by Ssn6p; upregulated in an RHE model; mRNA binds to She3p	1.03003	0.57068	0.63982
orf19.2695	ORF19.2695	UBR1	Protein similar to S. cerevisiae Ubr1p ubiquitin-protein ligase; transposon mutation affects filamentous growth	1.0133	0.35224	0.51088
orf19.2695_RC	ORF19.2695	UBR1	Protein similar to S. cerevisiae Ubr1p ubiquitin-protein ligase; transposon mutation affects filamentous growth	-1.01722	-0.04761	0.68904
orf19.2699	ORF19.2699	ABP1	Protein similar to S. cerevisiae Abp1p, which is an actin-binding protein of the cortical actin cytoskeleton; caspofungin induced; protein only detected in stationary phase yeast-form cultures	-1.05798	-0.62995	0.31828
orf19.2699_RC	ORF19.2699	ABP1	Protein similar to S. cerevisiae Abp1p, which is an actin-binding protein of the cortical actin cytoskeleton; caspofungin induced; protein only detected in stationary phase yeast-form cultures	1.03041	0.00329	0.47704
orf19.2706	ORF19.2706	CRH11	GPI-anchored cell wall transglycosylase, putative ortholog of S. cerevisiae Crh1p; predicted glycosyl hydrolase domain; similar to Csf4p and to antigenic A. fumigatus Aspf9; predicted Kex2p substrate; caspofungin-induced	-1.00172	0.11735	0.9752
orf19.2706_RC	ORF19.2706	CRH11	GPI-anchored cell wall transglycosylase, putative ortholog of S. cerevisiae Crh1p; predicted glycosyl hydrolase domain; similar to Csf4p and to antigenic A. fumigatus Aspf9; predicted Kex2p substrate; caspofungin-induced	1.03412	0.55216	0.67843
orf19.2728	ORF19.2728	ORF19.2728	Ortholog(s) have DNA clamp loader activity, role in DNA damage checkpoint, nucleotide-excision repair, reciprocal meiotic recombination and Rad17 RFC-like complex, nucleus localization	1.04058	0.65679	0.44817
orf19.2728_RC	ORF19.2728	ORF19.2728	Ortholog(s) have DNA clamp loader activity, role in DNA damage checkpoint, nucleotide-excision repair, reciprocal meiotic recombination and Rad17 RFC-like complex, nucleus localization	1.021	0.45804	0.64174
orf19.2745	ORF19.2745	UME7	Putative transcription factor with zinc cluster DNA-binding motif; similar to S. cerevisiae Ume6p, which is a transcription factor involved in the regulation of meiotic genes	-1.17592	-1.41377	0.03535
orf19.2745_RC	ORF19.2745	UME7	Putative transcription factor with zinc cluster DNA-binding motif; similar to S. cerevisiae Ume6p, which is a transcription factor involved in the regulation of meiotic genes	1.00726	-0.16152	0.83442
orf19.2752	ORF19.2752	ADR1	Putative transcription factor with zinc finger DNA-binding motif; similar to S. cerevisiae Adr1p but mutant phenotype suggests that it has a different set of target genes; transposon mutation affects filamentous growth	-1.0479	-0.43989	0.45642
orf19.2752_RC	ORF19.2752	ADR1	Putative transcription factor with zinc finger DNA-binding motif; similar to S. cerevisiae Adr1p but mutant phenotype suggests that it has a different set of target genes; transposon mutation affects filamentous growth	-1.14044	-1.55697	0.39434
orf19.2753	ORF19.2753	ZCF15	Predicted zinc-finger protein	1.03926	0.68617	0.15964
orf19.2753_RC	ORF19.2753	ZCF15	Predicted zinc-finger protein	-1.01742	-0.05017	0.44309
orf19.2762	ORF19.2762	AHP1	Putative alkyl hydroperoxide reductase; immunogenic in mouse; biofilm-induced; fluconazole-induced; amphotericin B, caspofungin, alkaline downregulated; induced in core stress response; regulated by Ssk1p, Nrg1p, Tup1p, Ssn6p, Hog1p, Hap43p	-1.05344	-0.45136	0.13529
orf19.2762_RC	ORF19.2762	AHP1	Putative alkyl hydroperoxide reductase; immunogenic in mouse; biofilm-induced; fluconazole-induced; amphotericin B, caspofungin, alkaline downregulated; induced in core stress response; regulated by Ssk1p, Nrg1p, Tup1p, Ssn6p, Hog1p, Hap43p	1.02034	0.21324	0.07566
orf19.2765	ORF19.2765	PGA62	Adhesin-like cell wall protein; putative GPI-anchor; fluconazole-induced; regulated by iron; expression greater in high iron; induced during cell wall regeneration; Cyr1p or Ras1p downregulated; positively regulated by Tbf1p	-1.01395	-0.01137	0.33127
orf19.2765_RC	ORF19.2765	PGA62	Adhesin-like cell wall protein; putative GPI-anchor; fluconazole-induced; regulated by iron; expression greater in high iron; induced during cell wall regeneration; Cyr1p or Ras1p downregulated; positively regulated by Tbf1p	1.00837	0.27406	0.68741
orf19.2767	ORF19.2767	PGA59	Adhesin-like cell wall protein; putative GPI-anchor; shows colony morphology-related gene regulation by Ssn6p; Hap43p-induced gene	1.00216	0.19133	0.85849
orf19.2767_RC	ORF19.2767	PGA59	Adhesin-like cell wall protein; putative GPI-anchor; shows colony morphology-related gene regulation by Ssn6p; Hap43p-induced gene	1.01342	0.35373	0.34718
orf19.2771	ORF19.2771	BEM3	Putative GTPase-activating protein (GAP) for Rho-type GTPase Cdc42p; involved in cell signaling pathways that control cell polarity; similar to S. cerevisiae Bem3p	1.03274	0.60013	0.25819
orf19.2771_RC	ORF19.2771	BEM3	Putative GTPase-activating protein (GAP) for Rho-type GTPase Cdc42p; involved in cell signaling pathways that control cell polarity; similar to S. cerevisiae Bem3p	1.01402	0.33395	0.80742
orf19.2781	ORF19.2781	ORF19.2781	Predicted ORF in Assemblies 19, 20 and 21; possibly an essential gene, disruptants not obtained by UAU1 method	-1.25301	-2.75715	0.05696
orf19.2781_RC	ORF19.2781	ORF19.2781	Predicted ORF in Assemblies 19, 20 and 21; possibly an essential gene, disruptants not obtained by UAU1 method	-1.14923	-1.65558	0.00297
orf19.2791	ORF19.2791	BBC1	Putative SH3-domain-containing protein	-1.01464	-0.02832	0.80277
orf19.2791_RC	ORF19.2791	BBC1	Putative SH3-domain-containing protein	-1.02373	-0.1409	0.56995
orf19.2808	ORF19.2808	ZCF16	Predicted zinc-finger protein; not essential for viability	1.11372	1.61926	0.31271
orf19.2808_RC	ORF19.2808	ZCF16	Predicted zinc-finger protein; not essential for viability	-1.02135	-0.14561	0.65806
orf19.2823	ORF19.2823	RFG1	Transcriptional regulator of filamentous growth and hyphal genes; acts in Tup1p-dependent and -independent pathways; binds DNA; has HMG domain; not transcriptionally regulated by oxygen or serum; not responsible for hypoxic repression	-1.17231	-1.92081	0.21427
orf19.2823_RC	ORF19.2823	RFG1	Transcriptional regulator of filamentous growth and hyphal genes; acts in Tup1p-dependent and -independent pathways; binds DNA; has HMG domain; not transcriptionally regulated by oxygen or serum; not responsible for hypoxic repression	-1.09474	-1.01862	0.2347
orf19.2833	ORF19.2833	PGA34	Putative GPI-anchored protein; transcription is repressed in response to alpha pheromone in SpiderM medium; late-stage biofilm-induced gene; induced in oralpharyngeal candidasis	-1.03954	-0.3739	0.44615
orf19.2833_RC	ORF19.2833	PGA34	Putative GPI-anchored protein; transcription is repressed in response to alpha pheromone in SpiderM medium; late-stage biofilm-induced gene; induced in oralpharyngeal candidasis	-1.02455	-0.18936	0.70128
orf19.2843	ORF19.2843	RHO1	Small GTPase of Rho family; regulates beta-1,3-glucan synthesis activity and binds Gsc1p; essential; expected to be geranylgeranylated by geranylgeranyltransferase type I; plasma membrane-localized	1.06648	0.10158	0.56508
orf19.2843_RC	ORF19.2843	RHO1	Small GTPase of Rho family; regulates beta-1,3-glucan synthesis activity and binds Gsc1p; essential; expected to be geranylgeranylated by geranylgeranyltransferase type I; plasma membrane-localized	-1.0438	-0.72355
orf19.2876	ORF19.2876	CBF1	Transcription factor that binds upstream of ribosomal protein genes and the rDNA locus, with Tbf1p; also regulates sulfur starvation-response, respiratory, and glycolytic genes; does not bind to centromeres as does S. cerevisiae Cbf1p	-1.00967	0.05482	0.58383
orf19.2876_RC	ORF19.2876	CBF1	Transcription factor that binds upstream of ribosomal protein genes and the rDNA locus, with Tbf1p; also regulates sulfur starvation-response, respiratory, and glycolytic genes; does not bind to centromeres as does S. cerevisiae Cbf1p	-1.02996	-0.21163	0.59869
orf19.2878	ORF19.2878	PGA15	Putative GPI-anchored protein	1.03872	0.63103	0.65867
orf19.2878_RC	ORF19.2878	PGA15	Putative GPI-anchored protein	-1.01127	0.02296	0.94555
orf19.2879	ORF19.2879	IFF5	Putative GPI-anchored protein; adhesin-like protein; planktonic growth-induced gene; possibly an essential gene, disruptants not obtained by UAU1 method	-1.00583	0.10103	0.66347
orf19.2879_RC	ORF19.2879	IFF5	Putative GPI-anchored protein; adhesin-like protein; planktonic growth-induced gene; possibly an essential gene, disruptants not obtained by UAU1 method	1.01476	0.37123	0.86828
orf19.2886	ORF19.2886	CEK1	ERK-family protein kinase, required for wild-type yeast-hyphal switching, mating efficiency, and virulence in a mouse model; Cst20p-Hst7p-Cek1p-Cph1p MAPK pathway regulates mating, and invasive hyphal growth under some conditions	-1.07772	-0.7982	0.14617
orf19.2886_RC	ORF19.2886	CEK1	ERK-family protein kinase, required for wild-type yeast-hyphal switching, mating efficiency, and virulence in a mouse model; Cst20p-Hst7p-Cek1p-Cph1p MAPK pathway regulates mating, and invasive hyphal growth under some conditions	1.02006	0.40974	0.80744
orf19.2906	ORF19.2906	PGA41	Putative GPI-anchored protein; adhesin-like protein	-1.0241	-0.15172	0.66779
orf19.2906_RC	ORF19.2906	PGA41	Putative GPI-anchored protein; adhesin-like protein	-1.03751	-0.28557	0.504
orf19.2907	ORF19.2907	PGA42	Putative GPI-anchored adhesin-like protein; decreased transcription is observed in azole-resistant strains that overexpress CDR1 and CDR2 or MDR1	1.06788	1.02191	0.05049
orf19.2907_RC	ORF19.2907	PGA42	Putative GPI-anchored adhesin-like protein; decreased transcription is observed in azole-resistant strains that overexpress CDR1 and CDR2 or MDR1	1.02895	0.48854	0.32487
orf19.2961	ORF19.2961	ORF19.2961	Putative transcription factor with zinc finger DNA-binding motif	1.02171	-0.22842
orf19.2961_RC	ORF19.2961	ORF19.2961	Putative transcription factor with zinc finger DNA-binding motif	1.09995	0.33934	0.27825
orf19.2969	ORF19.2969	RAD16	Protein similar to S. cerevisiae Rad16p; flucytosine induced; planktonic growth-induced	1.10027	1.44751	0.13239
orf19.2969_RC	ORF19.2969	RAD16	Protein similar to S. cerevisiae Rad16p; flucytosine induced; planktonic growth-induced	1.1118	1.58329	0.02104
orf19.2983	ORF19.2983	CDC73	Protein similar to S. cerevisiae Cdc73p, which is a transcription elongation factor; cdc73 kap114 double transposon mutation affects filamentous growth	1.00285	-0.1044	0.40345
orf19.2983_RC	ORF19.2983	CDC73	Protein similar to S. cerevisiae Cdc73p, which is a transcription elongation factor; cdc73 kap114 double transposon mutation affects filamentous growth	-1.03297	-0.49548	0.47332
orf19.3001	ORF19.3001	TEM1	Protein similar to S. cerevisiae Tem1p, which is a GTPase involved in termination of the M phase of the cell cycle; induced under Cdc5p depletion	-1.03629	-0.29283	0.04966
orf19.3001_RC	ORF19.3001	TEM1	Protein similar to S. cerevisiae Tem1p, which is a GTPase involved in termination of the M phase of the cell cycle; induced under Cdc5p depletion	1.03712	0.65892	0.78271
orf19.3010.1	ORF19.3010.1	ECM33	GPI-anchored cell wall protein; mutants show cell-wall defects and reduced adhesion, host cell damage, and endocytosis; mutant infection is immunoprotective in murine model; fluconazole-induced; caspofungin repressed	1.00588	0.25519	0.74856
orf19.3010.1_RC	ORF19.3010.1	ECM33	GPI-anchored cell wall protein; mutants show cell-wall defects and reduced adhesion, host cell damage, and endocytosis; mutant infection is immunoprotective in murine model; fluconazole-induced; caspofungin repressed	-1.05519	-0.53141	0.22488
orf19.3012	ORF19.3012	ARO80	Regulator of aromatic alcohol biosynthesis via the Ehrlich pathway; not essential for viability; similar to S. cerevisiae Aro80p, which is a transcriptional activator required for aromatic amino acid catabolism	1.0236	0.48568	0.08543
orf19.3012_RC	ORF19.3012	ARO80	Regulator of aromatic alcohol biosynthesis via the Ehrlich pathway; not essential for viability; similar to S. cerevisiae Aro80p, which is a transcriptional activator required for aromatic amino acid catabolism	1.00116	0.1931	0.97829
orf19.3014	ORF19.3014	BMH1	Sole 14-3-3 protein in C. albicans; role in hyphal growth; possibly regulated by host interaction; localizes to yeast-form cell surface,not hyphae; alternatively spliced intron in 5' UTR	-1.08712	-0.92485	0.37054
orf19.3014_RC	ORF19.3014	BMH1	Sole 14-3-3 protein in C. albicans; role in hyphal growth; possibly regulated by host interaction; localizes to yeast-form cell surface,not hyphae; alternatively spliced intron in 5' UTR	1.09949	1.39975	0.30822
orf19.3018	ORF19.3018	SPP1	Putative histone methyltransferase; induced by nitric oxide independent of Yhb1p; cell-cycle regulated periodic mRNA expression	1.00371	0.18333	0.88736
orf19.3018_RC	ORF19.3018	SPP1	Putative histone methyltransferase; induced by nitric oxide independent of Yhb1p; cell-cycle regulated periodic mRNA expression	-1.08641	-0.95842	0.36468
orf19.3049	ORF19.3049	ORF19.3049	Ortholog(s) have protein kinase activity, role in activation of bipolar cell growth, ascospore wall assembly, protein phosphorylation and cell division site, cytosol, nucleus, prospore membrane localization	-1.0028	0.14084	0.75896
orf19.3049_RC	ORF19.3049	ORF19.3049	Ortholog(s) have protein kinase activity, role in activation of bipolar cell growth, ascospore wall assembly, protein phosphorylation and cell division site, cytosol, nucleus, prospore membrane localization	1.05422	0.85559	0.21847
orf19.3071	ORF19.3071	MIH1	Putative protein phosphatase of the PTP family (tyrosine-specific), similar to S. cerevisiae Mih1p; mRNA binds to She3p	1.03692	0.60551	0.55445
orf19.3071_RC	ORF19.3071	MIH1	Putative protein phosphatase of the PTP family (tyrosine-specific), similar to S. cerevisiae Mih1p; mRNA binds to She3p	-1.04857	-0.44836	0.25493
orf19.3077	ORF19.3077	VID21	Subunit of the NuA4 histone acetyltransferase complex; soluble protein in hyphae	-1.00437	0.1202	0.71812
orf19.3077_RC	ORF19.3077	VID21	Subunit of the NuA4 histone acetyltransferase complex; soluble protein in hyphae	-1.05132	-0.51475	0.53138
orf19.3083	ORF19.3083	ORF19.3083	Ortholog(s) have role in DNA repair, actin cytoskeleton organization, cellular manganese ion homeostasis, dephosphorylation and endoplasmic reticulum localization	1.07637	0.17617	0.55535
orf19.3083_RC	ORF19.3083	ORF19.3083	Ortholog(s) have role in DNA repair, actin cytoskeleton organization, cellular manganese ion homeostasis, dephosphorylation and endoplasmic reticulum localization	-1.00464	-0.42931
orf19.3088	ORF19.3088	ORF19.3088	Putative transcription factor with bZIP DNA-binding motif; induced upon biofilm formation; possibly transcriptionally regulated upon hyphal formation; Hap43p-induced gene	-1.04865	-0.44932	0.48452
orf19.3088_RC	ORF19.3088	ORF19.3088	Putative transcription factor with bZIP DNA-binding motif; induced upon biofilm formation; possibly transcriptionally regulated upon hyphal formation; Hap43p-induced gene	1.04155	0.66327	0.54159
orf19.3093	ORF19.3093	MSH2	Putative DNA mismatch repair factor; transcription is regulated by Nrg1p; flucytosine repressed; RNA abundance regulated by tyrosol and cell density	-1.1263	-1.17685	0.05743
orf19.3093_RC	ORF19.3093	MSH2	Putative DNA mismatch repair factor; transcription is regulated by Nrg1p; flucytosine repressed; RNA abundance regulated by tyrosol and cell density	-1.07033	-0.79338	0.3488
orf19.3127	ORF19.3127	CZF1	Transcriptional regulator of white-opaque switching frequency; hyphal growth regulator; expression in S. cerevisiae causes dominant-negative inhibition of pheromone response; required for yeast cell adherence to silicone substrate	-1.01324	0.00023	0.78804
orf19.3127_RC	ORF19.3127	CZF1	Transcriptional regulator of white-opaque switching frequency; hyphal growth regulator; expression in S. cerevisiae causes dominant-negative inhibition of pheromone response; required for yeast cell adherence to silicone substrate	-1.00122	-0.02279	0.97449
orf19.3149	ORF19.3149	LSP1	Eisosome component with a predicted role in endocytosis; protein present in exponential and stationary growth phase yeast cultures; caspofungin repressed; biofilm induced; fungal-specific (no human/murine homolog); sumoylation target	1.08103	0.20583	0.63432
orf19.3149_RC	ORF19.3149	LSP1	Eisosome component with a predicted role in endocytosis; protein present in exponential and stationary growth phase yeast cultures; caspofungin repressed; biofilm induced; fungal-specific (no human/murine homolog); sumoylation target	1.11023	0.41097	0.30168
orf19.3153	ORF19.3153	MSS4	Phosphatidylinositol-4-phosphate 5-kinase; activity induced by phosphatidic acid (Pld1p product); macrophage/pseudohyphal-repressed; mRNA binds to She3p and is localized to yeast cell buds and hyphal tips; Hap43p-induced gene	undetected	undetected
orf19.3153_RC	ORF19.3153	MSS4	Phosphatidylinositol-4-phosphate 5-kinase; activity induced by phosphatidic acid (Pld1p product); macrophage/pseudohyphal-repressed; mRNA binds to She3p and is localized to yeast cell buds and hyphal tips; Hap43p-induced gene	1.17375	0.83904
orf19.3174	ORF19.3174	CDC24	GDP-GTP exchange factor for Cdc42p; phosphorylated; required for maintenance of hyphal growth; misexpression blocks hyphal growth and causes avirulence in a mouse model of systemic infection; antigenic during human oral infection	1.04471	0.75518	0.77706
orf19.3174_RC	ORF19.3174	CDC24	GDP-GTP exchange factor for Cdc42p; phosphorylated; required for maintenance of hyphal growth; misexpression blocks hyphal growth and causes avirulence in a mouse model of systemic infection; antigenic during human oral infection	1.10533	1.49974	0.18133
orf19.3178	ORF19.3178	ORF19.3178	Ortholog(s) have RNA binding activity, role in mRNA splicing, via spliceosome and U2-type prespliceosome localization	-1.06026	-0.58941	0.0317
orf19.3178_RC	ORF19.3178	ORF19.3178	Ortholog(s) have RNA binding activity, role in mRNA splicing, via spliceosome and U2-type prespliceosome localization	-1.05177	-0.47836	0.49971
orf19.3187	ORF19.3187	ZNC1	Zn(2)-Cys(6) binuclear cluster transcription factor; regulated by Gcn2p and Gcn4p; gene is located in zinc cluster region of Chromosome 5, near the MTL locus; required for yeast cell adherence to silicone substrate	1.01033	0.31347	0.77764
orf19.3187_RC	ORF19.3187	ZNC1	Zn(2)-Cys(6) binuclear cluster transcription factor; regulated by Gcn2p and Gcn4p; gene is located in zinc cluster region of Chromosome 5, near the MTL locus; required for yeast cell adherence to silicone substrate	1.02814	0.49851	0.72768
orf19.3188	ORF19.3188	TAC1	Transcriptional activator of drug-responsive genes including CDR1 and CDR2; has Zn(2)-Cys(6) binuclear cluster; binds DRE element; gene in zinc cluster region near MTL locus; resequencing indicates that TAC1 spans orf19.3188 and orf19.3189	1.06874	1.05624	0.01645
orf19.3188_RC	ORF19.3188	TAC1	Transcriptional activator of drug-responsive genes including CDR1 and CDR2; has Zn(2)-Cys(6) binuclear cluster; binds DRE element; gene in zinc cluster region near MTL locus; resequencing indicates that TAC1 spans orf19.3188 and orf19.3189	1.05774	0.86296	0.41139
orf19.3199	ORF19.3199	PIKA	Putative phosphatidylinositol kinase; non-sex gene located within the MTLa mating-type-like locus; planktonic growth-induced gene	1.10431	1.48749	0.28206
orf19.3199_RC	ORF19.3199	PIKA	Putative phosphatidylinositol kinase; non-sex gene located within the MTLa mating-type-like locus; planktonic growth-induced gene	1.14315	1.9438	0.09117
orf19.3200	ORF19.3200	MTLA2	Master regulator (activator) of a-type mating; has HMG domain, which is predicted to bind DNA; gene has intron; not related to S. cerevisiae MATa2; a/alpha mating type may increase virulence, provides competitive advantage	-1.04452	-0.30141	0.65163
orf19.3200_RC	ORF19.3200	MTLA2	Master regulator (activator) of a-type mating; has HMG domain, which is predicted to bind DNA; gene has intron; not related to S. cerevisiae MATa2; a/alpha mating type may increase virulence, provides competitive advantage	-1.01474	-0.21691	0.73016
orf19.3201	ORF19.3201	MTLA1	Homeodomain protein; gene of the MTLa (Mating Type Like) locus; a1p and alpha2p act together to repress white-opaque switching and mating (an opaque-specific process); a/alpha mating type may increase virulence by competitive advantage	-1.01676	-0.04695	0.85464
orf19.3201_RC	ORF19.3201	MTLA1	Homeodomain protein; gene of the MTLa (Mating Type Like) locus; a1p and alpha2p act together to repress white-opaque switching and mating (an opaque-specific process); a/alpha mating type may increase virulence by competitive advantage	1.03504	0.46105	0.13679
orf19.3207	ORF19.3207	CCN1	G1 cyclin; required for hyphal growth maintenance (not initiation); cell-cycle regulated transcription (G1/S); Cdc28p-Ccn1p initiates Cdc11p S394 phosphorylation on hyphal induction; expression in S. cerevisiae inhibits pheromone response	-1.21611	-1.77808	0.14091
orf19.3207_RC	ORF19.3207	CCN1	G1 cyclin; required for hyphal growth maintenance (not initiation); cell-cycle regulated transcription (G1/S); Cdc28p-Ccn1p initiates Cdc11p S394 phosphorylation on hyphal induction; expression in S. cerevisiae inhibits pheromone response	-1.12626	-1.04293	0.04258
orf19.3231	ORF19.3231	CDC27	Putative ubiquitin-protein ligase; periodic mRNA expression, peak at cell-cycle S/G2 phase	1.08031	0.20072	0.45771
orf19.3231_RC	ORF19.3231	CDC27	Putative ubiquitin-protein ligase; periodic mRNA expression, peak at cell-cycle S/G2 phase	1.01827	-0.25435
orf19.3252	ORF19.3252	DAL81	Predicted zinc-finger transcription factor with similarity to S. cerevisiae Dal81p, which is involved in the regulation of nitrogen-degradation genes; required for yeast cell adherence to silicone substrate	-1.04672	-0.36131	0.27558
orf19.3252_RC	ORF19.3252	DAL81	Predicted zinc-finger transcription factor with similarity to S. cerevisiae Dal81p, which is involved in the regulation of nitrogen-degradation genes; required for yeast cell adherence to silicone substrate	-1.01608	-0.03057	0.77184
orf19.3256	ORF19.3256	SLN1	Histidine kinase involved in a two-component signaling pathway that regulates cell wall biosynthesis; mutants are sensitive to growth on H2O2 medium	1.01667	0.39603	0.0865
orf19.3256_RC	ORF19.3256	SLN1	Histidine kinase involved in a two-component signaling pathway that regulates cell wall biosynthesis; mutants are sensitive to growth on H2O2 medium	-1.03159	-0.23283	0.13615
orf19.3263	ORF19.3263	ATO10	Putative fungal-specific transmembrane protein	-1.06652	-0.70376	0.17529
orf19.3263_RC	ORF19.3263	ATO10	Putative fungal-specific transmembrane protein	-1.03261	-0.26835	0.31344
orf19.3264	ORF19.3264	CCE1	Putative Holliday junction resolving enzyme; similar to S. cerevisiae Cce1p	-1.09317	-0.92204	0.13064
orf19.3264_RC	ORF19.3264	CCE1	Putative Holliday junction resolving enzyme; similar to S. cerevisiae Cce1p	1.12425	0.74637	0.13155
orf19.3281	ORF19.3281	ORF19.3281	Ortholog(s) have histone demethylase activity (H3-K36 specific), methylated histone residue binding activity and role in histone demethylation	-1.0728	-0.55103	0.26111
orf19.3281_RC	ORF19.3281	ORF19.3281	Ortholog(s) have histone demethylase activity (H3-K36 specific), methylated histone residue binding activity and role in histone demethylation	1.02867	0.13498	0.63444
orf19.3294	ORF19.3294	MBF1	Putative transcriptional coactivator; caspofungin repressed	1.01356	0.34043	0.0354
orf19.3294_RC	ORF19.3294	MBF1	Putative transcriptional coactivator; caspofungin repressed	1.01421	0.32083	0.50109
orf19.3300	ORF19.3300	ZPR1	Protein with putative zinc finger; regulated by Gcn4p; repressed in response to amino acid starvation (3-aminotriazole treatment); upregulation correlates with clinical development of fluconazole resistance	-1.12434	-1.29549	0.5274
orf19.3300_RC	ORF19.3300	ZPR1	Protein with putative zinc finger; regulated by Gcn4p; repressed in response to amino acid starvation (3-aminotriazole treatment); upregulation correlates with clinical development of fluconazole resistance	1.01204	-0.30158	0.00262
orf19.3302	ORF19.3302	ORF19.3302	Putative type-1 protein phosphatase targeting subunit; late-stage biofilm-induced gene; transcription downregulated upon yeast-hyphal switch; transcriptionally activated by Mnl1p under weak acid stress	1.09685	0.32291	0.29491
orf19.3302_RC	ORF19.3302	ORF19.3302	Putative type-1 protein phosphatase targeting subunit; late-stage biofilm-induced gene; transcription downregulated upon yeast-hyphal switch; transcriptionally activated by Mnl1p under weak acid stress	undetected	undetected
orf19.3305	ORF19.3305	ZCF17	Putative transcription factor with zinc cluster DNA-binding motif	-1.03833	-0.6831
orf19.3305_RC	ORF19.3305	ZCF17	Putative transcription factor with zinc cluster DNA-binding motif	1.02273	-0.22074	0.48071
orf19.3308	ORF19.3308	STB5	Putative transcription factor with zinc cluster DNA-binding motif; has similarity to S. cerevisiae Stb5p; Hap43p-repressed gene	-1.12013	-1.33738	0.11329
orf19.3308_RC	ORF19.3308	STB5	Putative transcription factor with zinc cluster DNA-binding motif; has similarity to S. cerevisiae Stb5p; Hap43p-repressed gene	-1.03381	-0.28023	0.32393
orf19.3330	ORF19.3330	CRL1	Predicted GTPase of RHO family; CAAX motif geranylgeranylated; expression in S. cerevisiae causes dominant-negative inhibition of pheromone response	-1.01269	0.01136	0.90202
orf19.3330_RC	ORF19.3330	CRL1	Predicted GTPase of RHO family; CAAX motif geranylgeranylated; expression in S. cerevisiae causes dominant-negative inhibition of pheromone response	-1.02751	-0.18048	0.78678
orf19.3415	ORF19.3415	PTK2	Putative protein kinase of polyamine import; mutation confers hypersensitivity to high concentrations of tunicamycin; upregulated in biofilm	1.03077	0.5435	0.31073
orf19.3415_RC	ORF19.3415	PTK2	Putative protein kinase of polyamine import; mutation confers hypersensitivity to high concentrations of tunicamycin; upregulated in biofilm	1.06911	1.06858	0.3691
orf19.3425	ORF19.3425	ORF19.3425	Planktonic growth-induced gene	-1.00279	-0.41511	0.86989
orf19.3425_RC	ORF19.3425	ORF19.3425	Planktonic growth-induced gene	1.07875	0.1896	0.33193
orf19.3434	ORF19.3434	TRY5	Transcriptional regulator of yeast form adherence; required for yeast cell adherence to silicone substrate	-1.00285	0.14026	0.96934
orf19.3434_RC	ORF19.3434	TRY5	Transcriptional regulator of yeast form adherence; required for yeast cell adherence to silicone substrate	1.0398	0.69295	0.37699
orf19.3449	ORF19.3449	ORF19.3449	Ortholog(s) have cytoplasm, ribosome localization	1.06206	0.89192	0.04942
orf19.3449_RC	ORF19.3449	ORF19.3449	Ortholog(s) have cytoplasm, ribosome localization	1.04491	0.76707	0.32579
orf19.3456	ORF19.3456	ORF19.3456	Predicted ORF in Assemblies 19, 20 and 21; possibly an essential gene, disruptants not obtained by UAU1 method	-1.05027	-0.55634	0.32297
orf19.3456_RC	ORF19.3456	ORF19.3456	Predicted ORF in Assemblies 19, 20 and 21; possibly an essential gene, disruptants not obtained by UAU1 method	-1.09588	-0.9154	0.31871
orf19.3459	ORF19.3459	ORF19.3459	Putative serine/threonine/tyrosine (dual-specificity) kinase; disruptants not obtained by UAU1 method	1.06408	0.99768	0.19191
orf19.3459_RC	ORF19.3459	ORF19.3459	Putative serine/threonine/tyrosine (dual-specificity) kinase; disruptants not obtained by UAU1 method	1.01335	0.35279	0.29083
orf19.3474	ORF19.3474	IPL1	Putative Aurora kinase; Hap43p-induced gene; induced during planktonic growth; possibly an essential gene, disruptants not obtained by UAU1 method	1.01993	0.43822	0.48021
orf19.3474_RC	ORF19.3474	IPL1	Putative Aurora kinase; Hap43p-induced gene; induced during planktonic growth; possibly an essential gene, disruptants not obtained by UAU1 method	-1.0264	-0.16619	0.53191
orf19.35	ORF19.35	ORF19.35	Biofilm-induced gene	1.024	0.49083	0.67554
orf19.35_RC	ORF19.35	ORF19.35	Biofilm-induced gene	1.0183	0.41714	0.52923
orf19.3506	ORF19.3506	DBR1	Debranchase; homozygous mutant accumulates lariat intermediates of mRNA splicing	-1.0897	-0.95622	0.22728
orf19.3506_RC	ORF19.3506	DBR1	Debranchase; homozygous mutant accumulates lariat intermediates of mRNA splicing	1.02903	0.55552	0.76535
orf19.3530	ORF19.3530	CKA2	Catalytic alpha-subunit of protein kinase CK2; interaction with calcineurin pathway affects fluconazole sensitivity; synthetically lethal with CKA1; attenuated virulence in a mouse oropharyngeal candidiasis but not in a systemic mouse model	-1.15637	-1.74012	0.17791
orf19.3530_RC	ORF19.3530	CKA2	Catalytic alpha-subunit of protein kinase CK2; interaction with calcineurin pathway affects fluconazole sensitivity; synthetically lethal with CKA1; attenuated virulence in a mouse oropharyngeal candidiasis but not in a systemic mouse model	-1.00989	0.03863	0.86642
orf19.3534	ORF19.3534	RHO3	Putative Rho family GTPase; possible substrate of protein farnesyltransferase and geranylgeranyltransferase type I; greater transcription in hyphal form than yeast form; plasma membrane-localized	-1.00257	0.12784	0.30485
orf19.3534_RC	ORF19.3534	RHO3	Putative Rho family GTPase; possible substrate of protein farnesyltransferase and geranylgeranyltransferase type I; greater transcription in hyphal form than yeast form; plasma membrane-localized	1.04275	0.71547	0.19775
orf19.3551	ORF19.3551	DAD2	Essential subunit of the Dam1 (DASH) complex, which acts in chromosome segregation by coupling kinetochores to spindle microtubules	-1.12834	-1.32286
orf19.3551_RC	ORF19.3551	DAD2	Essential subunit of the Dam1 (DASH) complex, which acts in chromosome segregation by coupling kinetochores to spindle microtubules	1.21932	1.13216
orf19.3561	ORF19.3561	CDC7	Putative kinase; cell-cycle regulated periodic mRNA expression; S. cerevisiae ortholog is not cell-cycle regulated; possibly an essential gene, disruptants not obtained by UAU1 method	-1.12829	-1.09505	0.06077
orf19.3561_RC	ORF19.3561	CDC7	Putative kinase; cell-cycle regulated periodic mRNA expression; S. cerevisiae ortholog is not cell-cycle regulated; possibly an essential gene, disruptants not obtained by UAU1 method	-1.07458	-0.7024	0.29133
orf19.3613	ORF19.3613	ORF19.3613	Ortholog(s) have RNA polymerase II core binding, RNA polymerase II core promoter sequence-specific DNA binding transcription factor activity, TFIIF-class binding transcription factor activity, chromatin binding activity	-1.05449	-0.51952	0.5771
orf19.3613_RC	ORF19.3613	ORF19.3613	Ortholog(s) have RNA polymerase II core binding, RNA polymerase II core promoter sequence-specific DNA binding transcription factor activity, TFIIF-class binding transcription factor activity, chromatin binding activity	-1.04945	-0.4565	0.1013
orf19.3642	ORF19.3642	SUN41	Cell wall glycosidase involved in biofilm formation and cell separation; possibly secreted; hypoxia and hyphal induced; caspofungin repressed; Efg1p, Cph1p regulated; O-glycosylation, potential Kex2p substrate; 9 5' E-boxes; 5'-UTR intron;	1.03065	0.52963	0.1216
orf19.3642_RC	ORF19.3642	SUN41	Cell wall glycosidase involved in biofilm formation and cell separation; possibly secreted; hypoxia and hyphal induced; caspofungin repressed; Efg1p, Cph1p regulated; O-glycosylation, potential Kex2p substrate; 9 5' E-boxes; 5'-UTR intron;	1.03767	0.59614	0.42016
orf19.3669	ORF19.3669	SHA3	Putative serine/threonine kinase involved in glucose transport; transposon mutation affects filamentous growth; fluconazole-induced; ketoconazole-repressed; induced in by alpha pheromone; possibly essential (UAU1 method); biofilm-induced	1.14144	0.62178	0.44383
orf19.3669_RC	ORF19.3669	SHA3	Putative serine/threonine kinase involved in glucose transport; transposon mutation affects filamentous growth; fluconazole-induced; ketoconazole-repressed; induced in by alpha pheromone; possibly essential (UAU1 method); biofilm-induced	1.15536	0.73468	0.46797
orf19.3683	ORF19.3683	AGE3	Putative ADP-ribosylation factor GTPase activating protein, functional ortholog of S. cerevisiae GCS1; mutation affects endocytosis, hyphal growth, chemical and drug resistance, and sensitivity to cell wall inhibitors	-1.0083	0.05791	0.8855
orf19.3683_RC	ORF19.3683	AGE3	Putative ADP-ribosylation factor GTPase activating protein, functional ortholog of S. cerevisiae GCS1; mutation affects endocytosis, hyphal growth, chemical and drug resistance, and sensitivity to cell wall inhibitors	-1.02036	-0.09187	0.09549
orf19.3715	ORF19.3715	ASF1	Protein similar to S. cerevisiae Asf1p, a chromatin assembly complex component; likely to be essential for growth, based on an insertional mutagenesis strategy	-1.04827	-0.57473	0.23704
orf19.3715_RC	ORF19.3715	ASF1	Protein similar to S. cerevisiae Asf1p, a chromatin assembly complex component; likely to be essential for growth, based on an insertional mutagenesis strategy	1.02489	-0.02957	0.74613
orf19.3738	ORF19.3738	PGA22	Putative GPI-anchored protein; adhesin-like protein	1.18621	2.34506	0.11244
orf19.3738_RC	ORF19.3738	PGA22	Putative GPI-anchored protein; adhesin-like protein	1.15217	2.04765	0.17267
orf19.3740	ORF19.3740	PGA23	Putative GPI-anchored protein of unknown function; transcription is negatively regulated by Rim101p; regulated by Cyr1p; shows colony morphology-related gene regulation by Ssn6p	-1.03801	-0.32622	0.46736
orf19.3740_RC	ORF19.3740	PGA23	Putative GPI-anchored protein of unknown function; transcription is negatively regulated by Rim101p; regulated by Cyr1p; shows colony morphology-related gene regulation by Ssn6p	1.0317	0.58975	0.22161
orf19.3751	ORF19.3751	ORF19.3751	Putative serine/threonine protein kinase; possibly an essential gene, disruptants not obtained by UAU1 method	1.02612	0.47257	0.61604
orf19.3751_RC	ORF19.3751	ORF19.3751	Putative serine/threonine protein kinase; possibly an essential gene, disruptants not obtained by UAU1 method	-1.02524	-0.16297	0.67325
orf19.3752	ORF19.3752	RAD51	Protein involved in homologous recombination and DNA repair; flucytosine induced; slow growth and increased white-to-opaque switching frequency in null mutant	-1.64735	-6.41109	0.03509
orf19.3752_RC	ORF19.3752	RAD51	Protein involved in homologous recombination and DNA repair; flucytosine induced; slow growth and increased white-to-opaque switching frequency in null mutant	-1.53269	-5.35688	0.00674
orf19.3753	ORF19.3753	SEF1	Zn2-Cys6 transcription factor; regulates iron uptake; transcription is negatively regulated by Sfu1p and positively regulated by Tbf1p; promotes virulence in mouse systemic infection; mutants display decreased colonization of mouse kidneys	-1.06119	-0.60618	0.13977
orf19.3753_RC	ORF19.3753	SEF1	Zn2-Cys6 transcription factor; regulates iron uptake; transcription is negatively regulated by Sfu1p and positively regulated by Tbf1p; promotes virulence in mouse systemic infection; mutants display decreased colonization of mouse kidneys	-1.0451	-0.41733	0.12325
orf19.3764	ORF19.3764	GSG1	Protein similar to S. cerevisiae Gsg1p, which is a subunit of the TRAPP complex involved in targeting of ER-to-Golgi transport vesicles; biofilm- and planktonic growth-induced gene	-1.09234	-0.95145	0.23644
orf19.3764_RC	ORF19.3764	GSG1	Protein similar to S. cerevisiae Gsg1p, which is a subunit of the TRAPP complex involved in targeting of ER-to-Golgi transport vesicles; biofilm- and planktonic growth-induced gene	-1.00884	0.05723	0.39926
orf19.3774	ORF19.3774	PPG1	Putative protein phosphatase of the Type 2A-related family (serine/threonine-specific), similar to S. cerevisiae Ppg1p; possibly an essential gene, disruptants not obtained by UAU1 method	-1.00485	-0.05981	0.84851
orf19.3774_RC	ORF19.3774	PPG1	Putative protein phosphatase of the Type 2A-related family (serine/threonine-specific), similar to S. cerevisiae Ppg1p; possibly an essential gene, disruptants not obtained by UAU1 method	1.04048	0.22531	0.31899
orf19.3794	ORF19.3794	CSR1	Zinc-finger transcription factor involved in zinc homeostasis and in regulation of biofilm matrix; mutation affects filamentous growth; can suppress S. cerevisiae rok1 mutant inviability	-1.0628	-0.61883	0.02465
orf19.3794_RC	ORF19.3794	CSR1	Zinc-finger transcription factor involved in zinc homeostasis and in regulation of biofilm matrix; mutation affects filamentous growth; can suppress S. cerevisiae rok1 mutant inviability	-1.06637	-0.65355	0.42581
orf19.3809	ORF19.3809	BAS1	Putative transcription factor with Myb-like DNA-binding motif; similar to S. cerevisiae Bas1p, which is a regulator of purine biosynthetic genes; null mutant exhibits adenine auxotrophy and abnormal colony morphology	1.25789	1.37183	0.42549
orf19.3809_RC	ORF19.3809	BAS1	Putative transcription factor with Myb-like DNA-binding motif; similar to S. cerevisiae Bas1p, which is a regulator of purine biosynthetic genes; null mutant exhibits adenine auxotrophy and abnormal colony morphology	undetected	undetected
orf19.3829	ORF19.3829	PHR1	Glycosidase of cell surface; may act on cell-wall beta-1,3-glucan prior to beta-1,6-glucan linkage; E169 and E270 at active site; role in systemic but not vaginal virulence (neutral, not low pH); high pH or filamentation induced	1.04082	0.63103	0.20907
orf19.3829_RC	ORF19.3829	PHR1	Glycosidase of cell surface; may act on cell-wall beta-1,3-glucan prior to beta-1,6-glucan linkage; E169 and E270 at active site; role in systemic but not vaginal virulence (neutral, not low pH); high pH or filamentation induced	1.08058	1.11329	0.34673
orf19.384	ORF19.384	ORF19.384	Ortholog(s) have Golgi apparatus, cytosol, nucleus localization	-1.10567	-0.86788	0.30172
orf19.384_RC	ORF19.384	ORF19.384	Ortholog(s) have Golgi apparatus, cytosol, nucleus localization	-1.04132	-0.30896	0.40539
orf19.3841	ORF19.3841	ORF19.3841	Ortholog(s) have protein serine/threonine kinase activity	-1.04619	-0.44826	0.24946
orf19.3841_RC	ORF19.3841	ORF19.3841	Ortholog(s) have protein serine/threonine kinase activity	1.07731	1.11741	0.13182
orf19.3856	ORF19.3856	CDC28	Cyclin-dependent protein kinase, interacts with regulatory subunit Cyb1p; involved in determination of cell morphology during the cell cycle; phosphorylated primarily by Swe1p and phosphorylation is regulated by Hsl1p; intron in 5'-UTR	1.05279	0.85688	0.00271
orf19.3856_RC	ORF19.3856	CDC28	Cyclin-dependent protein kinase, interacts with regulatory subunit Cyb1p; involved in determination of cell morphology during the cell cycle; phosphorylated primarily by Swe1p and phosphorylation is regulated by Hsl1p; intron in 5'-UTR	-1.06427	-0.65622	0.02797
orf19.3865	ORF19.3865	RFX1	DNA binding protein involved in DNA damage responses, morphogenesis, and virulence	-1.022	-0.51841	0.67748
orf19.3865_RC	ORF19.3865	RFX1	DNA binding protein involved in DNA damage responses, morphogenesis, and virulence	1.11565	0.46045	0.56574
orf19.390	ORF19.390	CDC42	Rho-type GTPase; required for budding and maintenance of hyphal growth; GGTase I geranylgeranylated; misexpression blocks hyphal growth, causes avirulence in mouse IV infection; shows actin-dependent localization to hyphal tip	-1.05406	-0.51717	0.00335
orf19.390_RC	ORF19.390	CDC42	Rho-type GTPase; required for budding and maintenance of hyphal growth; GGTase I geranylgeranylated; misexpression blocks hyphal growth, causes avirulence in mouse IV infection; shows actin-dependent localization to hyphal tip	1.0543	0.87576	0.38654
orf19.3912	ORF19.3912	GLN3	GATA transcription factor involved in regulation of filamentous growth induced by nitrogen starvation; regulates transcription of Mep2p ammonium permease; regulated by Gcn2p and Gcn4p; mRNA binds to She3p	-1.08736	-0.75957	0.05839
orf19.3912_RC	ORF19.3912	GLN3	GATA transcription factor involved in regulation of filamentous growth induced by nitrogen starvation; regulates transcription of Mep2p ammonium permease; regulated by Gcn2p and Gcn4p; mRNA binds to She3p	-1.03765	-0.34959	0.34115
orf19.3923	ORF19.3923	PGA37	Putative GPI-anchored protein; Hap43p-repressed gene	1.04856	0.80367	0.50938
orf19.3923_RC	ORF19.3923	PGA37	Putative GPI-anchored protein; Hap43p-repressed gene	1.07172	1.09209	0.25519
orf19.3957	ORF19.3957	ORF19.3957	Ortholog(s) have GTP cyclohydrolase I activity, role in folic acid-containing compound biosynthetic process and cytosol, nucleus localization	-1.15428	-1.68289	0.08184
orf19.3957_RC	ORF19.3957	ORF19.3957	Ortholog(s) have GTP cyclohydrolase I activity, role in folic acid-containing compound biosynthetic process and cytosol, nucleus localization	-1.03007	-0.25577	0.51246
orf19.3969	ORF19.3969	SFL2	Probable transcription factor required for filamentous growth; required for virulence in an RHE model but not in mouse systemic infection; upregulated upon RHE infection but C. dubliniensis ortholog is not upregulated	-1.41033	-4.33636	0.03714
orf19.3969_RC	ORF19.3969	SFL2	Probable transcription factor required for filamentous growth; required for virulence in an RHE model but not in mouse systemic infection; upregulated upon RHE infection but C. dubliniensis ortholog is not upregulated	-1.25315	-2.74595	0.03786
orf19.3978	ORF19.3978	ORF19.3978	Ortholog(s) have nucleolus localization	-1.08579	-0.90879	0.58002
orf19.3978_RC	ORF19.3978	ORF19.3978	Ortholog(s) have nucleolus localization	1.05637	0.82769	0.48272
orf19.3986	ORF19.3986	PPR1	Putative transcription factor with zinc cluster DNA-binding motif; has similarity to S. cerevisiae Ppr1p, which is a transcription factor involved in the regulation of uracil biosynthesis genes	-1.12317	-1.35553	0.18616
orf19.3986_RC	ORF19.3986	PPR1	Putative transcription factor with zinc cluster DNA-binding motif; has similarity to S. cerevisiae Ppr1p, which is a transcription factor involved in the regulation of uracil biosynthesis genes	-1.02121	-0.09923	0.70005
orf19.399	ORF19.399	ORF19.399	Putative serine/threonine protein kinase; possibly an essential gene, disruptants not obtained by UAU1 method	-1.06713	-0.67992	0.04009
orf19.399_RC	ORF19.399	ORF19.399	Putative serine/threonine protein kinase; possibly an essential gene, disruptants not obtained by UAU1 method	-1.05189	-0.49009	0.42184
orf19.4000	ORF19.4000	GRF10	Putative homeodomain transcription factor; null mutant exhibits adenine auxotrophy	-1.04142	-0.35798	0.26255
orf19.4000_RC	ORF19.4000	GRF10	Putative homeodomain transcription factor; null mutant exhibits adenine auxotrophy	-1.02121	-0.13368	0.79517
orf19.4002	ORF19.4002	DUN1	Protein similar to S. cerevisiae Dun1p, which is a serine-threonine protein kinase involved in DNA damage cell-cycle checkpoint; induced under Cdc5p depletion	-1.00119	0.14779	0.98076
orf19.4002_RC	ORF19.4002	DUN1	Protein similar to S. cerevisiae Dun1p, which is a serine-threonine protein kinase involved in DNA damage cell-cycle checkpoint; induced under Cdc5p depletion	1.02567	0.51115	0.48675
orf19.4009	ORF19.4009	CNB1	Regulatory subunit of calcineurin B (Ca[2+]-calmodulin-regulated S/T protein phosphatase); required for wild-type resistance to fluconazole or to SDS; micafungin is fungicidal to null mutant	-1.06178	-0.61351	0.35347
orf19.4009_RC	ORF19.4009	CNB1	Regulatory subunit of calcineurin B (Ca[2+]-calmodulin-regulated S/T protein phosphatase); required for wild-type resistance to fluconazole or to SDS; micafungin is fungicidal to null mutant	-1.02629	-0.16477	0.08042
orf19.4014	ORF19.4014	ORF19.4014	Planktonic growth-induced gene	-1.03794	-0.31247	0.27307
orf19.4014_RC	ORF19.4014	ORF19.4014	Planktonic growth-induced gene	-1.04811	-0.35949	0.37062
orf19.4015	ORF19.4015	CAG1	Alpha subunit of heterotrimeric G protein; positive role in mating pheromone response; more mRNA in opaque than white cells; transcriptionally repressed by MTLa1p-MTLalpha2p complex; regulated by hemoglobin-responsive Hbr1p via MTL genes	1.01625	0.39058	0.66425
orf19.4015_RC	ORF19.4015	CAG1	Alpha subunit of heterotrimeric G protein; positive role in mating pheromone response; more mRNA in opaque than white cells; transcriptionally repressed by MTLa1p-MTLalpha2p complex; regulated by hemoglobin-responsive Hbr1p via MTL genes	1.00011	0.13576	0.99718
orf19.403	ORF19.403	PCL2	Cyclin homolog; reduced expression observed upon depletion of Cln3p; farnesol regulated; periodic mRNA expression, peak at cell-cycle G1/S phase; Hap43p-induced gene	1.03386	0.2659	0.01978
orf19.403_RC	ORF19.403	PCL2	Cyclin homolog; reduced expression observed upon depletion of Cln3p; farnesol regulated; periodic mRNA expression, peak at cell-cycle G1/S phase; Hap43p-induced gene	1.00746	-0.10349	0.76096
orf19.4056	ORF19.4056	BRG1	DNA-binding transcription factor involved in control of biofilm formation; recruits Hda1p to promoters of hypha-specific genes; transposon mutation affects filamentous growth; Hap43p-repressed gene; late-stage biofilm-induced	-1.05192	-0.49041	0.35475
orf19.4056_RC	ORF19.4056	BRG1	DNA-binding transcription factor involved in control of biofilm formation; recruits Hda1p to promoters of hypha-specific genes; transposon mutation affects filamentous growth; Hap43p-repressed gene; late-stage biofilm-induced	1.0083	0.26981	0.88788
orf19.4084	ORF19.4084	KIS1	Snf1p complex scaffold protein; similar to S. cerevisiae Gal83p and Sip2p with regions of similarity to Sip1p (ASC and KIS domain); interacts with Snf4p; mutants are hypersensitive to caspofungin and hydrogen peroxide; Hap43p-repressed gene	-1.11362	-1.22179
orf19.4084_RC	ORF19.4084	KIS1	Snf1p complex scaffold protein; similar to S. cerevisiae Gal83p and Sip2p with regions of similarity to Sip1p (ASC and KIS domain); interacts with Snf4p; mutants are hypersensitive to caspofungin and hydrogen peroxide; Hap43p-repressed gene	1.1268	0.52493
orf19.4086	ORF19.4086	ORF19.4086	Ortholog(s) have cytoplasm localization	-1.09812	-1.11393	0.52217
orf19.4086_RC	ORF19.4086	ORF19.4086	Ortholog(s) have cytoplasm localization	1.08153	0.20939	0.04432
orf19.410.3	ORF19.410.3	ORF19.410.3	Lumazine synthase (6,7-dimethyl-8-ribityllumazine synthase, DMRL synthase); catalyzes the penultimate step in the synthesis of riboflavin; Hap43p-induced gene	-1.05982	-0.53046	0.3178
orf19.410.3_RC	ORF19.410.3	ORF19.410.3	Lumazine synthase (6,7-dimethyl-8-ribityllumazine synthase, DMRL synthase); catalyzes the penultimate step in the synthesis of riboflavin; Hap43p-induced gene	-1.0496	-0.56788	0.17671
orf19.4105	ORF19.4105	ORF19.4105	Ortholog(s) have role in DNA repair, DNA replication checkpoint, establishment of mitotic sister chromatid cohesion, maintenance of DNA repeat elements, meiotic chromosome segregation, replication fork arrest, replication fork protection	1.03861	0.65637	0.5946
orf19.4105_RC	ORF19.4105	ORF19.4105	Ortholog(s) have role in DNA repair, DNA replication checkpoint, establishment of mitotic sister chromatid cohesion, maintenance of DNA repeat elements, meiotic chromosome segregation, replication fork arrest, replication fork protection	1.1215	1.72113	0.44247
orf19.4125	ORF19.4125	ORF19.4125	Putative transcription factor with zinc finger DNA-binding motif; Hap43p-induced	-1.00851	-0.44571	0.94992
orf19.4125_RC	ORF19.4125	ORF19.4125	Putative transcription factor with zinc finger DNA-binding motif; Hap43p-induced	1.22218	1.1502
orf19.4127	ORF19.4127	ORF19.4127	Ortholog(s) have actin filament binding activity, role in actin cortical patch localization, actin filament bundle assembly, endocytosis and actin cortical patch localization	1.01322	-0.30696	0.69014
orf19.4127_RC	ORF19.4127	ORF19.4127	Ortholog(s) have actin filament binding activity, role in actin cortical patch localization, actin filament bundle assembly, endocytosis and actin cortical patch localization	-1.01056	-0.47457
orf19.4145	ORF19.4145	ZCF20	Predicted zinc-finger protein of unknown function; regulated by Sef1p, Sfu1p, and Hap43p; Hap43p-induced	1.08706	1.27967	0.17957
orf19.4145_RC	ORF19.4145	ZCF20	Predicted zinc-finger protein of unknown function; regulated by Sef1p, Sfu1p, and Hap43p; Hap43p-induced	1.01732	0.40442	0.7338
orf19.4151	ORF19.4151	SPO1	Protein similar to phospholipase B; fungal-specific (no human or murine homolog)	-1.05997	-0.66767	0.4269
orf19.4151_RC	ORF19.4151	SPO1	Protein similar to phospholipase B; fungal-specific (no human or murine homolog)	-1.03045	-0.43952	0.69261
orf19.4152	ORF19.4152	CEF3	Translation elongation factor 3; antigenic in humans; predicted C-term nucleotide-binding active site; protein on surface of yeast, not hyphae; polystyrene adherence induced; higher protein amount in stationary phase; possibly essential	1.05126	0.84235	0.33512
orf19.4152_RC	ORF19.4152	CEF3	Translation elongation factor 3; antigenic in humans; predicted C-term nucleotide-binding active site; protein on surface of yeast, not hyphae; polystyrene adherence induced; higher protein amount in stationary phase; possibly essential	1.00649	0.25169	0.92216
orf19.4161	ORF19.4161	ORF19.4161	Ortholog(s) have role in DNA repair and Smc5-Smc6 complex, nucleus localization	1.06917	0.12094	0.64737
orf19.4161_RC	ORF19.4161	ORF19.4161	Ortholog(s) have role in DNA repair and Smc5-Smc6 complex, nucleus localization	1.18251	0.89964
orf19.4162	ORF19.4162	MLH1	Putative mismatch repair protein; cell-cycle regulated periodic mRNA expression	1.02531	0.47628	0.34552
orf19.4162_RC	ORF19.4162	MLH1	Putative mismatch repair protein; cell-cycle regulated periodic mRNA expression	1.07705	1.07306	0.5555
orf19.4166	ORF19.4166	ZCF21	Predicted Zn2-Cys6 zinc-finger protein; mutants display increased colonization of mouse kidneys	-1.03542	-0.31364	0.58577
orf19.4166_RC	ORF19.4166	ZCF21	Predicted Zn2-Cys6 zinc-finger protein; mutants display increased colonization of mouse kidneys	-1.03426	-0.28208	0.59638
orf19.4185	ORF19.4185	ORF19.4185	Ortholog(s) have phosphoprotein phosphatase activity, thiosulfate sulfurtransferase activity, role in DNA-dependent DNA replication, protein dephosphorylation, regulation of DNA-dependent DNA replication and cytosol, nucleus localization	-1.02486	-0.15674	0.56258
orf19.4185_RC	ORF19.4185	ORF19.4185	Ortholog(s) have phosphoprotein phosphatase activity, thiosulfate sulfurtransferase activity, role in DNA-dependent DNA replication, protein dephosphorylation, regulation of DNA-dependent DNA replication and cytosol, nucleus localization	-1.00997	0.00981	0.90332
orf19.4192	ORF19.4192	CDC14	Protein involved in exit from mitosis and morphogenesis; ortholog of S. cerevisiae Cdc14p, which is a dual-specificity phosphatase and cell-cycle regulator; suppresses S. cerevisiae cdc15-lyt1, dbf2-2, and (partially) tem1 mutant phenotypes	1.0071	0.24353	0.9037
orf19.4192_RC	ORF19.4192	CDC14	Protein involved in exit from mitosis and morphogenesis; ortholog of S. cerevisiae Cdc14p, which is a dual-specificity phosphatase and cell-cycle regulator; suppresses S. cerevisiae cdc15-lyt1, dbf2-2, and (partially) tem1 mutant phenotypes	-1.008	0.04701	0.26603
orf19.4208	ORF19.4208	RAD52	Required for homologous DNA recombination, repair of UV- or MMS-damaged DNA, telomere length, UV-induced LOH; constitutive expression, MMS-induced; weakly complements S. cerevisiae rad52 mutant; slow growth, increased white-to-opaque switch	-1.08758	-0.95472	0.34151
orf19.4208_RC	ORF19.4208	RAD52	Required for homologous DNA recombination, repair of UV- or MMS-damaged DNA, telomere length, UV-induced LOH; constitutive expression, MMS-induced; weakly complements S. cerevisiae rad52 mutant; slow growth, increased white-to-opaque switch	-1.05086	-0.50491	0.19592
orf19.4222	ORF19.4222	SST2	Predicted regulator of G-protein signaling in mating pathway; null mutation causes alpha-factor hypersensitivity and mating defect (in an opaque MTLa/MTLa background); transcription induced by alpha factor; planktonic growth-induced	1.22849	1.19158	0.43301
orf19.4222_RC	ORF19.4222	SST2	Predicted regulator of G-protein signaling in mating pathway; null mutation causes alpha-factor hypersensitivity and mating defect (in an opaque MTLa/MTLa background); transcription induced by alpha factor; planktonic growth-induced	-1.14378	-1.4274	0.6013
orf19.4225	ORF19.4225	LEU3	Zinc-finger protein; putative role in regulating branched-chain amino acid biosynthesis genes; alkaline upregulated; transcriptionally activated by Mnl1p under weak acid stress; required for yeast cell adherence to silicone substrate	-1.06698	-0.70698	0.32861
orf19.4225_RC	ORF19.4225	LEU3	Zinc-finger protein; putative role in regulating branched-chain amino acid biosynthesis genes; alkaline upregulated; transcriptionally activated by Mnl1p under weak acid stress; required for yeast cell adherence to silicone substrate	-1.07598	-0.789	0.18325
orf19.4242	ORF19.4242	CST20	Protein kinase of Ste20p/p65PAK family, required for wild-type mating efficiency and virulence in a mouse model; Cst20p-Hst7p-Cek1p-Cph1p MAPK pathway regulates some hyphal growth; involved in Cdc42p growth regulation	1.03037	0.57252	0.53122
orf19.4242_RC	ORF19.4242	CST20	Protein kinase of Ste20p/p65PAK family, required for wild-type mating efficiency and virulence in a mouse model; Cst20p-Hst7p-Cek1p-Cph1p MAPK pathway regulates some hyphal growth; involved in Cdc42p growth regulation	-1.10453	-1.12503	0.00487
orf19.4251	ORF19.4251	ZCF22	Predicted zinc-finger protein	-1.02771	-0.4089	0.28715
orf19.4251_RC	ORF19.4251	ZCF22	Predicted zinc-finger protein	-1.1018	-1.06066	0.23771
orf19.4252	ORF19.4252	ORF19.4252	Ortholog(s) have protein serine/threonine kinase activity	-1.09518	-1.0124	0.25771
orf19.4252_RC	ORF19.4252	ORF19.4252	Ortholog(s) have protein serine/threonine kinase activity	1.0081	0.28334	0.04791
orf19.4255	ORF19.4255	ECM331	GPI-anchored protein; mainly at plasma membrane, also at cell wall; Hap43p-, caspofungin-induced; Plc1p-regulated; repressed by Rim101p, Hog1p; colony morphology-related regulated by Ssn6p; induced by ketoconazole and hypoxia	1.06346	0.98993	0.50514
orf19.4255_RC	ORF19.4255	ECM331	GPI-anchored protein; mainly at plasma membrane, also at cell wall; Hap43p-, caspofungin-induced; Plc1p-regulated; repressed by Rim101p, Hog1p; colony morphology-related regulated by Ssn6p; induced by ketoconazole and hypoxia	1.06085	0.91303	0.22275
orf19.428	ORF19.428	ORF19.428	Putative serine/threonine kinase; induced during planktonic growth	-1.02538	-0.12205	0.47558
orf19.428_RC	ORF19.428	ORF19.428	Putative serine/threonine kinase; induced during planktonic growth	1.03675	0.48034	0.23503
orf19.4295	ORF19.4295	ORF19.4295	Ortholog(s) have DNA binding, nucleosome binding, transcription corepressor activity	-1.00818	0.07021	0.85608
orf19.4295_RC	ORF19.4295	ORF19.4295	Ortholog(s) have DNA binding, nucleosome binding, transcription corepressor activity	1.12854	1.72195	0.01584
orf19.4297	ORF19.4297	CKB2	Regulatory subunit of protein kinase CK2 (casein kinase II), beta' subunit; null mutants are hypersensitive to caspofungin	1.38348	2.12464	0.00894
orf19.4297_RC	ORF19.4297	CKB2	Regulatory subunit of protein kinase CK2 (casein kinase II), beta' subunit; null mutants are hypersensitive to caspofungin	1.01281	-0.29577	0.85193
orf19.4308	ORF19.4308	HSL1	Probable protein kinase involved in determination of morphology during the cell cycle of both yeast-form and hyphal cells via regulation of Swe1p and Cdc28p; required for full virulence and kidney colonization in mouse systemic infection	-1.14538	-1.55347	0.01903
orf19.4308_RC	ORF19.4308	HSL1	Probable protein kinase involved in determination of morphology during the cell cycle of both yeast-form and hyphal cells via regulation of Swe1p and Cdc28p; required for full virulence and kidney colonization in mouse systemic infection	-1.17519	-1.95316	0.02873
orf19.4318	ORF19.4318	MIG1	Transcriptional repressor; regulates genes for carbon source utilization; Tup1p-dependent, -independent functions; upregulated in biofilm and planktonic cultures; hyphal downregulated; Hap43p and caspofungin repressed	1.05435	0.87642	0.15622
orf19.4318_RC	ORF19.4318	MIG1	Transcriptional repressor; regulates genes for carbon source utilization; Tup1p-dependent, -independent functions; upregulated in biofilm and planktonic cultures; hyphal downregulated; Hap43p and caspofungin repressed	1.0347	0.62809	0.05128
orf19.4361	ORF19.4361	IFF3	Putative GPI-anchored protein	-1.10065	-1.1071	0.12375
orf19.4361_RC	ORF19.4361	IFF3	Putative GPI-anchored protein	-1.19399	-2.19771	0.02251
orf19.4367	ORF19.4367	SMC1	Protein similar to chromosomal ATPases; RNA abundance regulated by tyrosol and cell density; cell-cycle regulated periodic mRNA expression	1.05923	0.93734	0.16309
orf19.4367_RC	ORF19.4367	SMC1	Protein similar to chromosomal ATPases; RNA abundance regulated by tyrosol and cell density; cell-cycle regulated periodic mRNA expression	1.11402	1.49012	0.28993
orf19.4377	ORF19.4377	KRE1	Predicted GPI-anchor, role in 1,6-beta-D-glucan biosynthesis; production in S. cerevisiae increases glucan content and complements killer toxin sensitivity of kre1 mutant; possible N-linked glycosylation; caspofungin and biofilm induced	-1.03994	-0.33918	0.40319
orf19.4377_RC	ORF19.4377	KRE1	Predicted GPI-anchor, role in 1,6-beta-D-glucan biosynthesis; production in S. cerevisiae increases glucan content and complements killer toxin sensitivity of kre1 mutant; possible N-linked glycosylation; caspofungin and biofilm induced	1.05461	0.83703	0.21798
orf19.4401	ORF19.4401	YVH1	Putative dual specificity phosphatase (phosphoserine/threonine and phosphotyrosine phosphatase); required for wild-type growth rate and for wild-type virulence in mouse model of systemic infection; Hap43p-induced gene	-1.01132	-0.16076	0.72777
orf19.4401_RC	ORF19.4401	YVH1	Putative dual specificity phosphatase (phosphoserine/threonine and phosphotyrosine phosphatase); required for wild-type growth rate and for wild-type virulence in mouse model of systemic infection; Hap43p-induced gene	1.02454	0.22871	0.11834
orf19.4427	ORF19.4427	SKP1	Putative subunit D of kinetochore protein complex CBF3; regulated by Gcn4p; repressed in response to amino acid starvation (3-aminotriazole treatment)	-1.02678	-0.13896	0.13291
orf19.4427_RC	ORF19.4427	SKP1	Putative subunit D of kinetochore protein complex CBF3; regulated by Gcn4p; repressed in response to amino acid starvation (3-aminotriazole treatment)	1.14448	1.3666	0.22942
orf19.4432	ORF19.4432	KSP1	Putative serine/threonine protein kinase; mRNA binds to She3p and is localized to hyphal tips; mutation confers hypersensitivity to amphotericin B	-1.04349	-0.38709	0.65251
orf19.4432_RC	ORF19.4432	KSP1	Putative serine/threonine protein kinase; mRNA binds to She3p and is localized to hyphal tips; mutation confers hypersensitivity to amphotericin B	-1.04191	-0.36555	0.35361
orf19.4433	ORF19.4433	CPH1	Transcription factor required for mating and hyphal growth on solid media; in filamentation pathway with Ess1p and Czf1p; required with Efg1p for host cytokine response; regulates genes of galactose metabolism	1.02987	-0.17461	0.64914
orf19.4433_RC	ORF19.4433	CPH1	Transcription factor required for mating and hyphal growth on solid media; in filamentation pathway with Ess1p and Czf1p; required with Efg1p for host cytokine response; regulates genes of galactose metabolism	-1.06885	-0.83316	0.25721
orf19.4438	ORF19.4438	RME1	Protein similar to S. cerevisiae meiotic regulator Rme1p; white-specific transcription; upregulation correlates with clinical development of fluconazole resistance; biofilm and planktonic growth-induced gene; Upc2p-regulated in hypoxia	-1.26456	-2.00246	0.03236
orf19.4438_RC	ORF19.4438	RME1	Protein similar to S. cerevisiae meiotic regulator Rme1p; white-specific transcription; upregulation correlates with clinical development of fluconazole resistance; biofilm and planktonic growth-induced gene; Upc2p-regulated in hypoxia	-1.13776	-1.19219	0.09305
orf19.4450	ORF19.4450	ZCF23	Predicted zinc-finger protein; late-stage biofilm-induced gene	-1.11133	-0.89541	0.01013
orf19.4450_RC	ORF19.4450	ZCF23	Predicted zinc-finger protein; late-stage biofilm-induced gene	-1.02109	-0.09832	0.55563
orf19.4518	ORF19.4518	ORF19.4518	Protein not essential for viability	1.04831	0.81294	0.29248
orf19.4518_RC	ORF19.4518	ORF19.4518	Protein not essential for viability	1.05952	0.87784	0.43789
orf19.4534	ORF19.4534	ORF19.4534	Putative UBX-domain (ubiquitin-regulatory domain) protein; macrophage-downregulated gene	-1.11188	-0.97809	0.07054
orf19.4534_RC	ORF19.4534	ORF19.4534	Putative UBX-domain (ubiquitin-regulatory domain) protein; macrophage-downregulated gene	1.07631	0.51492	0.06913
orf19.4537	ORF19.4537	ORF19.4537	Ortholog(s) have RNA polymerase II core binding, RNA polymerase II regulatory region DNA binding, core RNA polymerase II recruiting transcription factor activity	1.06002	0.94726	0.24273
orf19.4537_RC	ORF19.4537	ORF19.4537	Ortholog(s) have RNA polymerase II core binding, RNA polymerase II regulatory region DNA binding, core RNA polymerase II recruiting transcription factor activity	1.03302	0.55509	0.13389
orf19.454	ORF19.454	SFL1	Transcription factor involved in negative regulation of flocculation and filamentous growth; induced in core caspofungin response	-1.15522	-1.72702	0.08494
orf19.454_RC	ORF19.454	SFL1	Transcription factor involved in negative regulation of flocculation and filamentous growth; induced in core caspofungin response	-1.09672	-1.05127	0.17758
orf19.4549	ORF19.4549	FGR38	Protein lacking an ortholog in S. cerevisiae; member of a family of related proteins; transposon mutation affects filamentous growth; macrophage-induced gene; Hap43p-repressed gene	-1.02338	-0.13148	0.61485
orf19.4549_RC	ORF19.4549	FGR38	Protein lacking an ortholog in S. cerevisiae; member of a family of related proteins; transposon mutation affects filamentous growth; macrophage-induced gene; Hap43p-repressed gene	1.06389	1.01769	0.19247
orf19.4560	ORF19.4560	BFR1	Protein involved in the maintenance of normal ploidy; S. cerevisiae ortholog cofers Brefeldin A resistance; stationary phase enriched protein	-1.23023	-2.6461	0.2418
orf19.4560_RC	ORF19.4560	BFR1	Protein involved in the maintenance of normal ploidy; S. cerevisiae ortholog cofers Brefeldin A resistance; stationary phase enriched protein	-1.16109	-1.79349	0.1178
orf19.4568	ORF19.4568	ZCF25	Putative transcription factor with zinc cluster DNA-binding motif	-1.00985	0.04835	0.66753
orf19.4568_RC	ORF19.4568	ZCF25	Putative transcription factor with zinc cluster DNA-binding motif	1.00567	0.25241	0.84227
orf19.4593	ORF19.4593	RGA2	Putative GTPase-activating protein (GAP) for Rho-type GTPase Cdc42p; involved in cell signaling pathways controlling cell polarity; similar to S. cerevisiae Rga2p; induced upon low-level peroxide stress; late-stage biofilm-induced	-1.01401	-0.00587	0.31036
orf19.4593_RC	ORF19.4593	RGA2	Putative GTPase-activating protein (GAP) for Rho-type GTPase Cdc42p; involved in cell signaling pathways controlling cell polarity; similar to S. cerevisiae Rga2p; induced upon low-level peroxide stress; late-stage biofilm-induced	-1.08164	-0.85818	0.35062
orf19.460	ORF19.460	CEK2	MAP kinase required for wild-type efficiency of mating; component of the signal transduction pathway that regulates mating; ortholog of S. cerevisiae Fus3p; induced by Cph1p, pheromone; transposon mutation affects filamentous growth	1.11838	0.46723	0.47748
orf19.460_RC	ORF19.460	CEK2	MAP kinase required for wild-type efficiency of mating; component of the signal transduction pathway that regulates mating; ortholog of S. cerevisiae Fus3p; induced by Cph1p, pheromone; transposon mutation affects filamentous growth	1.06947	0.12308	0.38202
orf19.4623.3	ORF19.4623.3	NHP6A	Putative non-histone chromatin component; RNA abundance regulated by tyrosol and cell density; Hap43p-induced; amphotericin B, caspofungin repressed; intron in 5'-UTR	-1.09681	-0.86001	0.28719
orf19.4623.3_RC	ORF19.4623.3	NHP6A	Putative non-histone chromatin component; RNA abundance regulated by tyrosol and cell density; Hap43p-induced; amphotericin B, caspofungin repressed; intron in 5'-UTR	1.0275	0.15957	0.05356
orf19.4645	ORF19.4645	BEM1	Protein required for wild-type budding, hyphal growth, and virulence in a mouse systemic infection; suppresses pseudohyphal and filamentous growth defects of various S. cerevisiae mutants and heat sensitivity of S. cerevisiae cdc24-4 mutant	-1.12318	-1.35565	0.07671
orf19.4645_RC	ORF19.4645	BEM1	Protein required for wild-type budding, hyphal growth, and virulence in a mouse systemic infection; suppresses pseudohyphal and filamentous growth defects of various S. cerevisiae mutants and heat sensitivity of S. cerevisiae cdc24-4 mutant	-1.0337	-0.22981	0.22961
orf19.4649	ORF19.4649	ZCF27	Putative transcription factor with zinc cluster DNA-binding motif	1.04939	0.81416	0.33687
orf19.4649_RC	ORF19.4649	ZCF27	Putative transcription factor with zinc cluster DNA-binding motif	1.00866	0.29155	0.92491
orf19.4651	ORF19.4651	PGA53	GPI-anchored cell surface protein of unknown function; greater mRNA abundance observed in a cyr1 homozygous null mutant than in wild type	1.0827	1.22104	0.03819
orf19.4651_RC	ORF19.4651	PGA53	GPI-anchored cell surface protein of unknown function; greater mRNA abundance observed in a cyr1 homozygous null mutant than in wild type	1.04065	0.64197	0.56287
orf19.4662	ORF19.4662	RLM1	Putative transcription factor; required for wild-type resistance to cell wall perturbation, caspofungin treatment; regulates caspofungin induction of PGA13	1.03825	0.25488	0.21246
orf19.4662_RC	ORF19.4662	RLM1	Putative transcription factor; required for wild-type resistance to cell wall perturbation, caspofungin treatment; regulates caspofungin induction of PGA13	1.02031	0.06383	0.7068
orf19.4670	ORF19.4670	CAS5	Zinc finger transcription factor, cell wall damage response; required for adherence, response/resistance to caspofungin; repressed in core stress response; mutants have reduced CFU in mice and hyphal defect during C. elegans infection	-1.24954	-2.03693	0.04448
orf19.4670_RC	ORF19.4670	CAS5	Zinc finger transcription factor, cell wall damage response; required for adherence, response/resistance to caspofungin; repressed in core stress response; mutants have reduced CFU in mice and hyphal defect during C. elegans infection	-1.08168	-0.65098	0.26499
orf19.4689	ORF19.4689	PGA57	Putative GPI-anchored protein; Hap43p-induced gene	1.09609	1.30947	0.20932
orf19.4689_RC	ORF19.4689	PGA57	Putative GPI-anchored protein; Hap43p-induced gene	1.09021	1.28954	0.25845
orf19.4722	ORF19.4722	ORF19.4722	Ortholog(s) have sequence-specific DNA binding RNA polymerase II transcription factor activity	-1.1054	-0.8808	0.10018
orf19.4722_RC	ORF19.4722	ORF19.4722	Ortholog(s) have sequence-specific DNA binding RNA polymerase II transcription factor activity	-1.01212	-0.01615	0.59291
orf19.4725	ORF19.4725	SWI6	Putative component of the MBF and SBF transcription complexes involved in G1/S cell-cycle progression; periodic mRNA expression, peak at cell-cycle G1/S phase	-1.10256	-1.14474	0.07547
orf19.4725_RC	ORF19.4725	SWI6	Putative component of the MBF and SBF transcription complexes involved in G1/S cell-cycle progression; periodic mRNA expression, peak at cell-cycle G1/S phase	-1.09372	-1.07307	0.26689
orf19.4752	ORF19.4752	MSN4	Zinc finger transcription factor; similar to S. cerevisiae Msn4p, but not a significant stress response regulator in C. albicans; partly complements STRE-activation defect of S. cerevisiae msn2 msn4 double mutant; biofilm-induced gene	-1.09579	-0.79097	0.28686
orf19.4752_RC	ORF19.4752	MSN4	Zinc finger transcription factor; similar to S. cerevisiae Msn4p, but not a significant stress response regulator in C. albicans; partly complements STRE-activation defect of S. cerevisiae msn2 msn4 double mutant; biofilm-induced gene	-1.052	-0.50356	0.35386
orf19.4765	ORF19.4765	PGA6	Putative GPI-anchored cell wall adhesin-like protein; transcriptionally induced under high iron conditions; upregulated upon Als2p depletion; mRNA binds to She3p and is localized to hyphal tips	1.00156	0.1984	0.91834
orf19.4765_RC	ORF19.4765	PGA6	Putative GPI-anchored cell wall adhesin-like protein; transcriptionally induced under high iron conditions; upregulated upon Als2p depletion; mRNA binds to She3p and is localized to hyphal tips	-1.01972	-0.07999	0.46496
orf19.4766	ORF19.4766	ARG81	Zinc cluster DNA-binding motif transcription factor; required for utilization of ornithine as a nitrogen source and for wild-type resistance to caffeine; required for yeast cell adherence to silicone substrate	1.0186	0.40579	0.77656
orf19.4766_RC	ORF19.4766	ARG81	Zinc cluster DNA-binding motif transcription factor; required for utilization of ornithine as a nitrogen source and for wild-type resistance to caffeine; required for yeast cell adherence to silicone substrate	1.06253	0.97844	0.07928
orf19.4767	ORF19.4767	ZCF28	Putative transcription factor with zinc cluster DNA-binding motif; required for yeast cell adherence to silicone substrate	-1.11433	-1.32746	0.42359
orf19.4767_RC	ORF19.4767	ZCF28	Putative transcription factor with zinc cluster DNA-binding motif; required for yeast cell adherence to silicone substrate	-1.03724	-0.32337	0.27114
orf19.4775	ORF19.4775	CTA8	Essential transcription factor, mediates heat shock transcriptional induction; in the absence of heat stress, Cta8p levels are modulated by growth temperature to regulate basal expression of genes involved in protein folding	-1.04768	-0.32386	0.23684
orf19.4775_RC	ORF19.4775	CTA8	Essential transcription factor, mediates heat shock transcriptional induction; in the absence of heat stress, Cta8p levels are modulated by growth temperature to regulate basal expression of genes involved in protein folding	1.02535	0.18457	0.07506
orf19.4776	ORF19.4776	LYS143	Putative transcription factor with zinc cluster DNA-binding motif; has similarity to S. cerevisiae Lys14p, which is a transcription factor involved in the regulation of lysine biosynthesis genes	-1.04896	-0.45317	0.44154
orf19.4776_RC	ORF19.4776	LYS143	Putative transcription factor with zinc cluster DNA-binding motif; has similarity to S. cerevisiae Lys14p, which is a transcription factor involved in the regulation of lysine biosynthesis genes	1.03171	0.55087	0.46842
orf19.4778	ORF19.4778	LYS142	Putative transcription factor with zinc cluster DNA-binding motif; has similarity to S. cerevisiae Lys14p, which is a transcription factor involved in the regulation of lysine biosynthesis genes; fungal-specific	1.13213	0.56128
orf19.4778_RC	ORF19.4778	LYS142	Putative transcription factor with zinc cluster DNA-binding motif; has similarity to S. cerevisiae Lys14p, which is a transcription factor involved in the regulation of lysine biosynthesis genes; fungal-specific	1.24145	1.27415	0.58274
orf19.4785	ORF19.4785	PTC1	Putative protein phosphatase of the Type 2C-related family (serine/threonine-specific), similar to S. cerevisiae Ptc1p; mutant shows virulence defect	-1.01863	-0.10288	0.8242
orf19.4785_RC	ORF19.4785	PTC1	Putative protein phosphatase of the Type 2C-related family (serine/threonine-specific), similar to S. cerevisiae Ptc1p; mutant shows virulence defect	-1.00312	0.13094	0.95761
orf19.4796	ORF19.4796	ORF19.4796	Putative eIF-4E-binding repressor of CAP-dependent translation; stationary phase enriched protein	-1.09749	-0.80595	0.29777
orf19.4796_RC	ORF19.4796	ORF19.4796	Putative eIF-4E-binding repressor of CAP-dependent translation; stationary phase enriched protein	1.0325	0.18391	0.20719
orf19.4799	ORF19.4799	ORF19.4799	Ortholog(s) have role in mRNA splicing, via spliceosome and Prp19 complex, U2-type catalytic step 1 spliceosome localization	-1.0882	-0.73439	0.27316
orf19.4799_RC	ORF19.4799	ORF19.4799	Ortholog(s) have role in mRNA splicing, via spliceosome and Prp19 complex, U2-type catalytic step 1 spliceosome localization	1.02928	0.39722	0.31873
orf19.4853	ORF19.4853	HCM1	Protein with forkhead domain; similar to S. cerevisiae Hcm1p; Hap43p-induced gene	-1.07505	-0.84137	0.3369
orf19.4853_RC	ORF19.4853	HCM1	Protein with forkhead domain; similar to S. cerevisiae Hcm1p; Hap43p-induced gene	-1.03254	-0.26074	0.22671
orf19.4866	ORF19.4866	CPP1	VH1 family MAPK phosphatase; regulates Cst20p-Hst7p-Cek1p-Cph1p hyphal growth pathway; represses yeast to hyphal switch; required for virulence in mouse systemic infection; more mRNA in yeast than hyphae; pheromone-induced	1.00681	0.22191	0.80162
orf19.4866_RC	ORF19.4866	CPP1	VH1 family MAPK phosphatase; regulates Cst20p-Hst7p-Cek1p-Cph1p hyphal growth pathway; represses yeast to hyphal switch; required for virulence in mouse systemic infection; more mRNA in yeast than hyphae; pheromone-induced	-1.02526	-0.1655	0.5943
orf19.4867	ORF19.4867	SWE1	Putative protein kinase with a role in control of growth and morphogenesis, required for full virulence; mutant cells are small, rounded, and sometimes binucleate; not required for filamentous growth; mutant is hypersensitive to caspofungin	1.01308	0.3076	0.14742
orf19.4867_RC	ORF19.4867	SWE1	Putative protein kinase with a role in control of growth and morphogenesis, required for full virulence; mutant cells are small, rounded, and sometimes binucleate; not required for filamentous growth; mutant is hypersensitive to caspofungin	1.07212	1.07797	0.07936
orf19.4869	ORF19.4869	SFU1	Transcriptional regulator of iron-responsive genes; represses iron utilization genes if iron is present; Hap43p-repressed; promotes gastrointestinal commensalism in mice	-1.02809	-0.16464	0.29537
orf19.4869_RC	ORF19.4869	SFU1	Transcriptional regulator of iron-responsive genes; represses iron utilization genes if iron is present; Hap43p-repressed; promotes gastrointestinal commensalism in mice	1.0618	0.96587	0.19436
orf19.487	ORF19.487	SPT14	Putative DNA-binding transcription factor; predicted role in regulation of biogenesis of the cell wall; upregulated in biofilm; protein newly produced during adaptation to the serum	-1.02272	-0.11878	0.48807
orf19.487_RC	ORF19.487	SPT14	Putative DNA-binding transcription factor; predicted role in regulation of biogenesis of the cell wall; upregulated in biofilm; protein newly produced during adaptation to the serum	-1.02977	-0.21578	0.19987
orf19.4890	ORF19.4890	CLA4	Ste20p family Ser/Thr kinase required for wild-type filamentous growth, organ colonization and virulence in mouse systemic infection; role in chlamydospore formation; functional homolog of S. cerevisiae Cla4p; mutant caspofungin sensitive	1.02143	-0.23052
orf19.4890_RC	ORF19.4890	CLA4	Ste20p family Ser/Thr kinase required for wild-type filamentous growth, organ colonization and virulence in mouse systemic infection; role in chlamydospore formation; functional homolog of S. cerevisiae Cla4p; mutant caspofungin sensitive	1.06054	0.05863	0.38182
orf19.4909	ORF19.4909	CBK1	Ser/Thr kinase of cell wall integrity pathway; mutants show abnormal morphology and aggregation; Mob2p associated; required for wild-type hyphal growth and transcriptional regulation of cell-wall-associated genes	1.023	0.45718	0.41035
orf19.4909_RC	ORF19.4909	CBK1	Ser/Thr kinase of cell wall integrity pathway; mutants show abnormal morphology and aggregation; Mob2p associated; required for wild-type hyphal growth and transcriptional regulation of cell-wall-associated genes	1.10995	1.4555	0.2382
orf19.4910	ORF19.4910	FGR41	Putative GPI-anchored protein; adhesin-like protein; transposon mutation affects filamentous growth	1.00879	0.29496	0.79314
orf19.4910_RC	ORF19.4910	FGR41	Putative GPI-anchored protein; adhesin-like protein; transposon mutation affects filamentous growth	-1.0194	-0.09223	0.13619
orf19.4941	ORF19.4941	TYE7	bHLH transcription factor involved in control of glycolysis; required for biofilm formation; hyphally regulated by Cph1p, Cyr1p; flucytosine, Hog1p induced; amphotericin B, caspofungin repressed; induced in biofilm and planktonic growth	-1.20205	-2.36626	0.08216
orf19.4941_RC	ORF19.4941	TYE7	bHLH transcription factor involved in control of glycolysis; required for biofilm formation; hyphally regulated by Cph1p, Cyr1p; flucytosine, Hog1p induced; amphotericin B, caspofungin repressed; induced in biofilm and planktonic growth	-1.08746	-0.98422	0.32557
orf19.4969	ORF19.4969	KEM1	5'-->3' exoribonuclease, component of cytoplasmic stress granules; required for wild-type filamentous growth; complements slow growth and mating of S. cerevisiae kem1 mutant, partially complements its invasive and pseudohyphal growth defect	1.02035	0.4437	0.76406
orf19.4969_RC	ORF19.4969	KEM1	5'-->3' exoribonuclease, component of cytoplasmic stress granules; required for wild-type filamentous growth; complements slow growth and mating of S. cerevisiae kem1 mutant, partially complements its invasive and pseudohyphal growth defect	-1.05233	-0.49552	0.37614
orf19.4979	ORF19.4979	KNS1	Ortholog(s) have protein serine/threonine kinase activity, protein tyrosine kinase activity, role in negative regulation of transcription from RNA polymerase III promoter, protein autophosphorylation and cytoplasm, nucleus localization	-1.03472	-0.21085	0.34371
orf19.4979_RC	ORF19.4979	KNS1	Ortholog(s) have protein serine/threonine kinase activity, protein tyrosine kinase activity, role in negative regulation of transcription from RNA polymerase III promoter, protein autophosphorylation and cytoplasm, nucleus localization	-1.01442	-0.1537	0.49825
orf19.5008	ORF19.5008	ORF19.5008		-1.00625	-0.44164	0.95393
orf19.5008_RC	ORF19.5008	ORF19.5008		1.28022	1.516	0.4521
orf19.5026	ORF19.5026	ORF19.5026	Putative transcription factor with zinc finger DNA-binding motif	-1.23093	-2.56494	0.19833
orf19.5026_RC	ORF19.5026	ORF19.5026	Putative transcription factor with zinc finger DNA-binding motif	-1.23004	-2.55537	0.14239
orf19.5031	ORF19.5031	SSK1	Response regulator of two-component system; role in oxidative stress response, cell wall biosynthesis, virulence, hyphal growth on solid media; expressed in hyphae and yeast-form cells; putative peroxisomal targeting sequence (PTS1)	-1.03795	-0.31398	0.49032
orf19.5031_RC	ORF19.5031	SSK1	Response regulator of two-component system; role in oxidative stress response, cell wall biosynthesis, virulence, hyphal growth on solid media; expressed in hyphae and yeast-form cells; putative peroxisomal targeting sequence (PTS1)	-1.0337	-0.24414	0.14119
orf19.5032	ORF19.5032	SIM1	Putative adhesin-like protein involved in cell wall maintenance, redundant with Sun41p; possibly secreted; macrophage-downregulated gene; transcription is negatively regulated by Rim101p, Cyr1p, Ras1p	1.08858	1.30507	0.07653
orf19.5032_RC	ORF19.5032	SIM1	Putative adhesin-like protein involved in cell wall maintenance, redundant with Sun41p; possibly secreted; macrophage-downregulated gene; transcription is negatively regulated by Rim101p, Cyr1p, Ras1p	1.06763	1.04691	0.17116
orf19.5045	ORF19.5045	PTP2	Predicted protein tyrosine phosphatase involved in regulation of MAP kinase Hog1p activity; transcriptionally activated by Mnl1p under weak acid stress	-1.04551	-0.44012	0.14194
orf19.5045_RC	ORF19.5045	PTP2	Predicted protein tyrosine phosphatase involved in regulation of MAP kinase Hog1p activity; transcriptionally activated by Mnl1p under weak acid stress	-1.0107	0.03831	0.60828
orf19.505	ORF19.505	SRV2	Adenylate cyclase-associated protein that regulates adenylate cyclase activity; required for wild-type germ tube formation and for virulence in mouse systemic infection; mutant defects in filamentous growth are rescued by cAMP or dbcAMP	-1.08533	-0.6619	0.10519
orf19.505_RC	ORF19.505	SRV2	Adenylate cyclase-associated protein that regulates adenylate cyclase activity; required for wild-type germ tube formation and for virulence in mouse systemic infection; mutant defects in filamentous growth are rescued by cAMP or dbcAMP	1.01028	0.07012	0.7067
orf19.5102	ORF19.5102	PLB5	Putative GPI-linked phospholipase B, fungal-specific (no mammalian homolog); null mutation eliminates cell-associated phospholipase A2 activity and attenuates virulence; fluconazole-repressed	1.04549	0.70364	0.05081
orf19.5102_RC	ORF19.5102	PLB5	Putative GPI-linked phospholipase B, fungal-specific (no mammalian homolog); null mutation eliminates cell-associated phospholipase A2 activity and attenuates virulence; fluconazole-repressed	1.02161	0.39379	0.15943
orf19.5104	ORF19.5104	LTP1	Putative protein phosphatase of the PTP family (tyrosine-specific), similar to S. cerevisiae Ltp1p	1.01012	0.25663	0.89225
orf19.5104_RC	ORF19.5104	LTP1	Putative protein phosphatase of the PTP family (tyrosine-specific), similar to S. cerevisiae Ltp1p	-1.01291	-0.0048	0.47675
orf19.513	ORF19.513	ORF19.513	Protein with a DNA-binding domain, similar to S. cerevisiae meiosis-specific transcription factor Ndt80p	1.00051	0.18105	0.98655
orf19.513_RC	ORF19.513	ORF19.513	Protein with a DNA-binding domain, similar to S. cerevisiae meiosis-specific transcription factor Ndt80p	1.04876	0.74158	0.43508
orf19.5144	ORF19.5144	PGA28	Protein similar to S. cerevisiae Wsc2p, which has roles in stress- and cell-wall-related processes; predicted Kex2p substrate; putative GPI-anchored adhesin-like protein	1.01698	0.34307	0.05573
orf19.5144_RC	ORF19.5144	PGA28	Protein similar to S. cerevisiae Wsc2p, which has roles in stress- and cell-wall-related processes; predicted Kex2p substrate; putative GPI-anchored adhesin-like protein	1.07464	1.0385	0.33216
orf19.5148	ORF19.5148	CYR1	Class III adenylyl cyclase; mutant lacks cAMP; mutant hyphal growth defect rescued by exogenous cAMP; required for mouse mucosal or systemic infection; role in macrophage sensitivity, apoptosis; downstream of Ras1p and CO2 signaling	1.00752	0.27672	0.91439
orf19.5148_RC	ORF19.5148	CYR1	Class III adenylyl cyclase; mutant lacks cAMP; mutant hyphal growth defect rescued by exogenous cAMP; required for mouse mucosal or systemic infection; role in macrophage sensitivity, apoptosis; downstream of Ras1p and CO2 signaling	-1.04585	-0.41407	0.03337
orf19.5156	ORF19.5156	ORF19.5156	Protein similar to S. cerevisiae Phs1p, which is required for growth; has six putative membrane-spanning regions	-1.07908	-0.79474	0.04221
orf19.5156_RC	ORF19.5156	ORF19.5156	Protein similar to S. cerevisiae Phs1p, which is required for growth; has six putative membrane-spanning regions	-1.02741	-0.19032	0.62385
orf19.5157	ORF19.5157	ORF19.5157	Predicted ORF in Assemblies 19, 20 and 21; six putative membrane-spanning regions; similar to S. cerevisiae Yjl097p, which is required for growth	-1.09981	-0.8705	0.00819
orf19.5157_RC	ORF19.5157	ORF19.5157	Predicted ORF in Assemblies 19, 20 and 21; six putative membrane-spanning regions; similar to S. cerevisiae Yjl097p, which is required for growth	-1.11468	-0.94267	0.09468
orf19.5160	ORF19.5160	ORF19.5160	Ortholog(s) have role in G1/S transition of mitotic cell cycle, TOR signaling cascade, dephosphorylation, regulation of chromosome segregation, tRNA wobble uridine modification and centromeric heterochromatin, cytosol, nucleus localization	-1.00051	0.16802	0.98453
orf19.5160_RC	ORF19.5160	ORF19.5160	Ortholog(s) have role in G1/S transition of mitotic cell cycle, TOR signaling cascade, dephosphorylation, regulation of chromosome segregation, tRNA wobble uridine modification and centromeric heterochromatin, cytosol, nucleus localization	1.05017	0.82947	0.22864
orf19.5175	ORF19.5175	ORF19.5175	Ortholog(s) have ubiquitin-protein ligase activity, role in ER-associated protein catabolic process and Doa10p ubiquitin ligase complex, integral to endoplasmic reticulum membrane, nuclear inner membrane localization	-1.05223	-0.49719	0.39037
orf19.5175_RC	ORF19.5175	ORF19.5175	Ortholog(s) have ubiquitin-protein ligase activity, role in ER-associated protein catabolic process and Doa10p ubiquitin ligase complex, integral to endoplasmic reticulum membrane, nuclear inner membrane localization	-1.02245	-0.12175	0.84965
orf19.5184	ORF19.5184	ORF19.5184	Ortholog(s) have Ran guanyl-nucleotide exchange factor activity, signal transducer activity	-1.206	-1.66302	0.06707
orf19.5184_RC	ORF19.5184	ORF19.5184	Ortholog(s) have Ran guanyl-nucleotide exchange factor activity, signal transducer activity	-1.01117	-0.43749	0.81735
orf19.5188	ORF19.5188	CHS1	Chitin synthase; essential; required for primary septum synthesis in yeast-form cells and hyphae; one of multiple chitin synthases; enzymatically activated by proteolytic processing; complements defects of S. cerevisiae chs1 or chs2 mutant	1.01273	0.34477	0.80623
orf19.5188_RC	ORF19.5188	CHS1	Chitin synthase; essential; required for primary septum synthesis in yeast-form cells and hyphae; one of multiple chitin synthases; enzymatically activated by proteolytic processing; complements defects of S. cerevisiae chs1 or chs2 mutant	-1.00687	0.08735	0.79667
orf19.5200	ORF19.5200	SIT4	Serine/threonine protein phosphatase catalytic subunit; has a role in cell wall maintenance, hyphal growth, and virulence in a mouse systemic infection model	-1.15362	-1.27911	0.1978
orf19.5200_RC	ORF19.5200	SIT4	Serine/threonine protein phosphatase catalytic subunit; has a role in cell wall maintenance, hyphal growth, and virulence in a mouse systemic infection model	1.058	0.32978	0.22139
orf19.5219	ORF19.5219	IRA2	Ortholog(s) have Ras GTPase activator activity and role in negative regulation of Ras protein signal transduction, negative regulation of cAMP biosynthetic process, positive regulation of Ras GTPase activity, response to stress	1.10912	1.08017	0.38715
orf19.5219_RC	ORF19.5219	IRA2	Ortholog(s) have Ras GTPase activator activity and role in negative regulation of Ras protein signal transduction, negative regulation of cAMP biosynthetic process, positive regulation of Ras GTPase activity, response to stress	1.05473	0.8909	0.35599
orf19.5224	ORF19.5224	ORF19.5224	Putative serine/threonine protein kinase with a predicted role in sphingolipid-mediated signaling pathway that controls endocytosis; mRNA binds to She3p and is localized to hyphal tips	1.06042	0.88998	0.36715
orf19.5224_RC	ORF19.5224	ORF19.5224	Putative serine/threonine protein kinase with a predicted role in sphingolipid-mediated signaling pathway that controls endocytosis; mRNA binds to She3p and is localized to hyphal tips	-1.09652	-1.03854	0.10739
orf19.5241	ORF19.5241	SNT1	Protein similar to S. cerevisiae Snt1p, which is an NAD-independent histone deacetylase; not essential for viability; transposon mutation affects filamentous growth	1.03756	0.66448	0.50709
orf19.5241_RC	ORF19.5241	SNT1	Protein similar to S. cerevisiae Snt1p, which is an NAD-independent histone deacetylase; not essential for viability; transposon mutation affects filamentous growth	-1.00717	0.08351	0.48845
orf19.5247	ORF19.5247	ORF19.5247	Ortholog(s) have cytoplasm localization	-1.02056	-0.09089	0.58118
orf19.5247_RC	ORF19.5247	ORF19.5247	Ortholog(s) have cytoplasm localization	1.08089	1.14377	0.26098
orf19.5257	ORF19.5257	LCB4	Putative sphingosine kinase; expression is Tac1p-regulated	1.00837	0.28398	0.87229
orf19.5257_RC	ORF19.5257	LCB4	Putative sphingosine kinase; expression is Tac1p-regulated	-1.00292	0.08399	0.72165
orf19.5265	ORF19.5265	KIP4	Transposon mutation affects filamentous growth; filament induced; shows Mob2p-dependent hyphal regulation; regulated by Nrg1p, Tup1p; induced in oralpharyngeal candidasis	-1.02795	-0.21482	0.23808
orf19.5265_RC	ORF19.5265	KIP4	Transposon mutation affects filamentous growth; filament induced; shows Mob2p-dependent hyphal regulation; regulated by Nrg1p, Tup1p; induced in oralpharyngeal candidasis	-1.06379	-0.48428	0.23681
orf19.5276	ORF19.5276	ORF19.5276	Putative nuclear pore-associated protein; Hap43p-induced gene; induced upon low-level peroxide stress; possibly an essential gene, disruptants not obtained by UAU1 method	1.0548	0.88198	0.38014
orf19.5276_RC	ORF19.5276	ORF19.5276	Putative nuclear pore-associated protein; Hap43p-induced gene; induced upon low-level peroxide stress; possibly an essential gene, disruptants not obtained by UAU1 method	1.03305	0.60706	0.5048
orf19.5303	ORF19.5303	PGA30	GPI-anchored protein of cell wall	-1.02822	-0.19119	0.54657
orf19.5303_RC	ORF19.5303	PGA30	GPI-anchored protein of cell wall	1.05242	0.77377	0.25445
orf19.5305	ORF19.5305	RHD3	GPI-anchored cell wall protein; yeast-associated protein; transcriptionally regulated by iron; expression greater in high iron; clade-associated gene expression; not essential for cell wall integrity; fluconazole-repressed	1.04942	0.82393	0.17011
orf19.5305_RC	ORF19.5305	RHD3	GPI-anchored cell wall protein; yeast-associated protein; transcriptionally regulated by iron; expression greater in high iron; clade-associated gene expression; not essential for cell wall integrity; fluconazole-repressed	-1.01833	-0.062	0.49762
orf19.532	ORF19.532	RBR2	Cell wall protein; expression is repressed by Rim101p; expression is regulated upon white-opaque switching; transcription is repressed in response to alpha pheromone in SpiderM medium; macrophage-induced gene	-1.09001	-0.94715	0.1711
orf19.532_RC	ORF19.532	RBR2	Cell wall protein; expression is repressed by Rim101p; expression is regulated upon white-opaque switching; transcription is repressed in response to alpha pheromone in SpiderM medium; macrophage-induced gene	-1.03954	-0.58361	0.07845
orf19.5326	ORF19.5326	ORF19.5326	Putative transcription factor with zinc finger DNA-binding motif; possible ortholog of S. cerevisiae Mig2p	-1.08996	-0.89522	0.02022
orf19.5326_RC	ORF19.5326	ORF19.5326	Putative transcription factor with zinc finger DNA-binding motif; possible ortholog of S. cerevisiae Mig2p	-1.05035	-0.45446	0.08809
orf19.5334	ORF19.5334	ORF19.5334	Biofilm- and planktonic growth-induced gene; transcription regulated upon yeast-hyphal switch	-1.05466	-0.5405	0.46569
orf19.5334_RC	ORF19.5334	ORF19.5334	Biofilm- and planktonic growth-induced gene; transcription regulated upon yeast-hyphal switch	1.00487	0.20131	0.94292
orf19.5335	ORF19.5335	SGS1	RecQ-related DNA helicase; Bloom's syndrome-related gene; haploinsufficient for wild-type lifespan; upregulated in farnesol treated biofilm	-1.0216	-0.12647	0.27635
orf19.5335_RC	ORF19.5335	SGS1	RecQ-related DNA helicase; Bloom's syndrome-related gene; haploinsufficient for wild-type lifespan; upregulated in farnesol treated biofilm	1.01195	0.1206	0.80852
orf19.5338	ORF19.5338	GAL4	Transcription factor with zinc cluster DNA-binding motif involved in control of glycolysis; ortholog of S. cerevisiae Gal4p, but not involved in the regulation of galactose utilization genes; caspofungin repressed	-1.18123	-1.5216	0.07713
orf19.5338_RC	ORF19.5338	GAL4	Transcription factor with zinc cluster DNA-binding motif involved in control of glycolysis; ortholog of S. cerevisiae Gal4p, but not involved in the regulation of galactose utilization genes; caspofungin repressed	-1.04117	-0.29929	0.02896
orf19.5343	ORF19.5343	ASH1	GATA-like transcription factor that localizes to nuclei of daughter cells and hyphal tip cells; mRNA localization is mediated by binding to She3p; required for wild-type virulence and filamentous growth	-1.08644	-0.90281	0.17053
orf19.5343_RC	ORF19.5343	ASH1	GATA-like transcription factor that localizes to nuclei of daughter cells and hyphal tip cells; mRNA localization is mediated by binding to She3p; required for wild-type virulence and filamentous growth	-1.03259	-0.28092	0.29734
orf19.535	ORF19.535	RBR1	Glycosylphosphatidylinositol (GPI)-anchored cell wall protein required for filamentous growth at acidic pH; expression is repressed by Rim101p and activated by Nrg1p; Hap43p-induced gene	1.0156	0.35497	0.3456
orf19.535_RC	ORF19.535	RBR1	Glycosylphosphatidylinositol (GPI)-anchored cell wall protein required for filamentous growth at acidic pH; expression is repressed by Rim101p and activated by Nrg1p; Hap43p-induced gene	1.0631	0.91391	0.21006
orf19.5350	ORF19.5350	ORF19.5350	Ortholog(s) have cyclin-dependent protein kinase activity	1.01446	0.35054	0.58153
orf19.5350_RC	ORF19.5350	ORF19.5350	Ortholog(s) have cyclin-dependent protein kinase activity	1.02106	0.4438	0.40289
orf19.5357	ORF19.5357	AKL1	Putative serine/threonine protein kinase; induced during the mating process	-1.09403	-1.00202	0.21018
orf19.5357_RC	ORF19.5357	AKL1	Putative serine/threonine protein kinase; induced during the mating process	1.02937	0.55813	0.50397
orf19.536	ORF19.536	ORF19.536	Ortholog(s) have chromatin binding, protein complex scaffold, ubiquitin binding activity and role in histone acetylation, transcription from RNA polymerase II promoter	-1.01933	-0.15487	0.33991
orf19.536_RC	ORF19.536	ORF19.536	Ortholog(s) have chromatin binding, protein complex scaffold, ubiquitin binding activity and role in histone acetylation, transcription from RNA polymerase II promoter	1.05782	0.54817	0.37334
orf19.5376	ORF19.5376	ORF19.5376	Predicted ORF in Assemblies 19, 20 and 21; possibly an essential gene, disruptants not obtained by UAU1 method	-1.03175	-0.23907	0.192
orf19.5376_RC	ORF19.5376	ORF19.5376	Predicted ORF in Assemblies 19, 20 and 21; possibly an essential gene, disruptants not obtained by UAU1 method	1.09806	1.44477	0.55298
orf19.5377	ORF19.5377	HOS2	Putative histone deacetylase; mutations affect filamentous growth; genetic evidence suggests that Set3p and Hos2p function together as a complex involved in regulation of white-opaque switching, morphogenesis, and virulence	-1.05809	-0.46143	0.12632
orf19.5377_RC	ORF19.5377	HOS2	Putative histone deacetylase; mutations affect filamentous growth; genetic evidence suggests that Set3p and Hos2p function together as a complex involved in regulation of white-opaque switching, morphogenesis, and virulence	-1.04303	-0.53093	0.14691
orf19.5380	ORF19.5380	LYS144	Putative transcription factor with zinc cluster DNA-binding motif; has similarity to S. cerevisiae Lys14p, which is a transcription factor involved in the regulation of lysine biosynthesis genes	-1.10382	-1.16319	0.13975
orf19.5380_RC	ORF19.5380	LYS144	Putative transcription factor with zinc cluster DNA-binding motif; has similarity to S. cerevisiae Lys14p, which is a transcription factor involved in the regulation of lysine biosynthesis genes	1.22438	2.93942	0.10416
orf19.5389	ORF19.5389	FKH2	Forkhead transcription factor; morphogenesis regulator; required for wild-type hyphal transcription, cell separation, and for virulence in cell culture; mutant lacks true hyphae, is constitutively pseudohyphal; upregulated in RHE model	1.00079	0.13795	0.98608
orf19.5389_RC	ORF19.5389	FKH2	Forkhead transcription factor; morphogenesis regulator; required for wild-type hyphal transcription, cell separation, and for virulence in cell culture; mutant lacks true hyphae, is constitutively pseudohyphal; upregulated in RHE model	1.02847	0.53591	0.49753
orf19.5408	ORF19.5408	HRK1	Ortholog(s) have protein serine/threonine kinase activity, role in cellular ion homeostasis, protein phosphorylation, regulation of nitrogen utilization and cell division site, cell tip, cytosol localization	-1.14202	-1.20185	0.07539
orf19.5408_RC	ORF19.5408	HRK1	Ortholog(s) have protein serine/threonine kinase activity, role in cellular ion homeostasis, protein phosphorylation, regulation of nitrogen utilization and cell division site, cell tip, cytosol localization	-1.05726	-0.59428	0.10146
orf19.5423	ORF19.5423	EST3	Telomerase subunit; required for telomere maintenance in vivo; separable roles in telomerase activity and processivity; not required for catalytic activity in vitro; related to mammalian Tpp1p	1.03967	0.66955	0.04629
orf19.5423_RC	ORF19.5423	EST3	Telomerase subunit; required for telomere maintenance in vivo; separable roles in telomerase activity and processivity; not required for catalytic activity in vitro; related to mammalian Tpp1p	1.11942	1.67874	0.07626
orf19.5438	ORF19.5438	ORF19.5438	Ortholog(s) have ubiquitin-protein ligase activity, role in protein sumoylation, protein ubiquitination, response to DNA damage stimulus, telomere maintenance and nucleus, ubiquitin ligase complex localization	-1.11838	-0.97889	0.16456
orf19.5438_RC	ORF19.5438	ORF19.5438	Ortholog(s) have ubiquitin-protein ligase activity, role in protein sumoylation, protein ubiquitination, response to DNA damage stimulus, telomere maintenance and nucleus, ubiquitin ligase complex localization	-1.0166	-0.10903	0.67832
orf19.5501	ORF19.5501	YAF9	Subunit of the NuA4 histone acetyltransferase complex; transcription is regulated by Mig1p; possibly an essential gene, disruptants not obtained by UAU1 method	-1.03277	-0.24788	0.50252
orf19.5501_RC	ORF19.5501	YAF9	Subunit of the NuA4 histone acetyltransferase complex; transcription is regulated by Mig1p; possibly an essential gene, disruptants not obtained by UAU1 method	1.047	0.7724	0.59612
orf19.5537	ORF19.5537	WSC2	Putative cell wall integrity and stress response protein; mRNA binds to She3p	-1.02902	-0.19982	0.51397
orf19.5537_RC	ORF19.5537	WSC2	Putative cell wall integrity and stress response protein; mRNA binds to She3p	-1.0465	-0.42224	0.04024
orf19.5548	ORF19.5548	LYS14	Putative transcription factor with zinc cluster DNA-binding motif; has similarity to S. cerevisiae Lys14p, which is a transcription factor involved in the regulation of lysine biosynthesis genes	-1.03087	-0.26397	0.50497
orf19.5548_RC	ORF19.5548	LYS14	Putative transcription factor with zinc cluster DNA-binding motif; has similarity to S. cerevisiae Lys14p, which is a transcription factor involved in the regulation of lysine biosynthesis genes	-1.01769	-0.05373	0.15037
orf19.5551	ORF19.5551	MIF2	Centromere-associated protein; similar to CENP-C proteins; Cse4p and Mif2p colocalize at C. albicans centromeres	-1.03429	-0.26729	0.33644
orf19.5551_RC	ORF19.5551	MIF2	Centromere-associated protein; similar to CENP-C proteins; Cse4p and Mif2p colocalize at C. albicans centromeres	-1.07289	-0.75098	0.00443
orf19.5636	ORF19.5636	RBT5	GPI-anchored cell wall protein involved in hemoglobin utilization; regulated by Rfg1p, Rim101p, Tbf1p, iron; repressed by Sfu1p, Hog1p, Tup1p; induced by serum, alkaline pH, ketoconazole, ciclopirox olamine, geldamycin, Hap43p, biofilm	1.01378	0.33606	0.86985
orf19.5636_RC	ORF19.5636	RBT5	GPI-anchored cell wall protein involved in hemoglobin utilization; regulated by Rfg1p, Rim101p, Tbf1p, iron; repressed by Sfu1p, Hog1p, Tup1p; induced by serum, alkaline pH, ketoconazole, ciclopirox olamine, geldamycin, Hap43p, biofilm	1.06822	0.98355	0.32585
orf19.5651	ORF19.5651	ORF19.5651	Ortholog(s) have histone demethylase activity (H3-dimethyl-K4 specific), histone demethylase activity (H3-trimethyl-K4 specific) activity	1.00774	0.27955	0.88679
orf19.5651_RC	ORF19.5651	ORF19.5651	Ortholog(s) have histone demethylase activity (H3-dimethyl-K4 specific), histone demethylase activity (H3-trimethyl-K4 specific) activity	-1.00239	0.14621	0.95962
orf19.5660	ORF19.5660	ORF19.5660	Ortholog(s) have ubiquitin-protein ligase activity, role in protein import into peroxisome matrix, protein ubiquitination and endoplasmic reticulum, peroxisomal membrane localization	-1.02865	-0.16874	0.40825
orf19.5660_RC	ORF19.5660	ORF19.5660	Ortholog(s) have ubiquitin-protein ligase activity, role in protein import into peroxisome matrix, protein ubiquitination and endoplasmic reticulum, peroxisomal membrane localization	1.03476	0.59133	0.50828
orf19.5661	ORF19.5661	PTC7	Protein phosphatase, type 2C; has S/T phosphatase activity, Mn2+/Mg2+ dependent; predicted membrane-spanning segment and mitochondrion-targeting signal	1.0795	0.17951	0.54923
orf19.5661_RC	ORF19.5661	PTC7	Protein phosphatase, type 2C; has S/T phosphatase activity, Mn2+/Mg2+ dependent; predicted membrane-spanning segment and mitochondrion-targeting signal	1.1059	0.37989	0.48249
orf19.5676	ORF19.5676	ORF19.5676	Ortholog(s) have cytosol, nucleus localization	-1.12953	-1.39838	0.10511
orf19.5676_RC	ORF19.5676	ORF19.5676	Ortholog(s) have cytosol, nucleus localization	-1.00184	0.09837	0.8399
orf19.5698	ORF19.5698	ORF19.5698	Putative mitochondrial ribosomal protein of the large subunit; transcription is upregulated in clinical isolates from HIV+ patients with oral candidiasis	1.15283	2.01201	0.23714
orf19.5698_RC	ORF19.5698	ORF19.5698	Putative mitochondrial ribosomal protein of the large subunit; transcription is upregulated in clinical isolates from HIV+ patients with oral candidiasis	1.06579	0.39687	0.29554
orf19.5722	ORF19.5722	ORF19.5722	Ortholog(s) have DNA binding activity and role in chromatin silencing at rDNA, negative regulation of extrachromosomal rDNA circle accumulation involved in replicative cell aging, termination of RNA polymerase I transcription	-1.06754	-0.58152	0.3473
orf19.5722_RC	ORF19.5722	ORF19.5722	Ortholog(s) have DNA binding activity and role in chromatin silencing at rDNA, negative regulation of extrachromosomal rDNA circle accumulation involved in replicative cell aging, termination of RNA polymerase I transcription	-1.0002	-0.13405	0.99324
orf19.5729	ORF19.5729	FGR17	Putative DNA-binding transcription factor; has zinc cluster DNA-binding motif; lacks an ortholog in S. cerevisiae; transposon mutation affects filamentous growth; Hap43p-repressed gene	-1.04722	-0.43	0.22311
orf19.5729_RC	ORF19.5729	FGR17	Putative DNA-binding transcription factor; has zinc cluster DNA-binding motif; lacks an ortholog in S. cerevisiae; transposon mutation affects filamentous growth; Hap43p-repressed gene	1.01034	0.2283	0.66329
orf19.5734	ORF19.5734	POP2	Component of the Ccr4-Pop2 mRNA deadenylase; heterozygous null mutant exhibits resistance to parnafungin and cordycepin in the C. albicans fitness test	-1.00608	0.08594	0.61313
orf19.5734_RC	ORF19.5734	POP2	Component of the Ccr4-Pop2 mRNA deadenylase; heterozygous null mutant exhibits resistance to parnafungin and cordycepin in the C. albicans fitness test	-1.04971	-0.44104	0.07072
orf19.5736	ORF19.5736	ALS5	ALS family adhesin; highly variable; expression in S. cerevisiae causes adhesion to human epithelium, endothelium or ECM, endothelial invasiveness by endocytosis and, at high abundance, ECM-induced aggregation; can form amyloid fibrils	-1.01184	-0.48424	0.86572
orf19.5736_RC	ORF19.5736	ALS5	ALS family adhesin; highly variable; expression in S. cerevisiae causes adhesion to human epithelium, endothelium or ECM, endothelial invasiveness by endocytosis and, at high abundance, ECM-induced aggregation; can form amyloid fibrils	1.09932	0.33498
orf19.5742	ORF19.5742	ALS9	ALS family cell-surface glycoprotein; expressed during infection of human epithelial cells; confers laminin adhesion to S. cerevisiae; highly variable; some with adhesin function; putative GPI-anchor; Hap43p-repressed	1.13466	0.6637	0.7424
orf19.5742_RC	ORF19.5742	ALS9	ALS family cell-surface glycoprotein; expressed during infection of human epithelial cells; confers laminin adhesion to S. cerevisiae; highly variable; some with adhesin function; putative GPI-anchor; Hap43p-repressed	1.1741	0.9277	0.50506
orf19.5758	ORF19.5758	SAL6	Putative protein phosphatase of the Type 1 family (serine/threonine-specific), similar to S. cerevisiae Ppq1p; mutant shows virulence defect	-1.04622	-0.41385	0.21715
orf19.5758_RC	ORF19.5758	SAL6	Putative protein phosphatase of the Type 1 family (serine/threonine-specific), similar to S. cerevisiae Ppq1p; mutant shows virulence defect	1.02313	0.47689	0.11699
orf19.5760	ORF19.5760	IHD1	Putative GPI-anchored protein; alkaline upregulated; greater transcription in hyphal form than yeast form; regulated by Nrg1p, Rfg1p, Tup1p; regulated by Tsa1p, Tsa1Bp in minimal media at 37; induced in oralpharyngeal candidasis	1.05046	0.74853	0.02721
orf19.5760_RC	ORF19.5760	IHD1	Putative GPI-anchored protein; alkaline upregulated; greater transcription in hyphal form than yeast form; regulated by Nrg1p, Rfg1p, Tup1p; regulated by Tsa1p, Tsa1Bp in minimal media at 37; induced in oralpharyngeal candidasis	1.0139	0.36001	0.23462
orf19.5762	ORF19.5762	PGA61	Putative GPI-anchored protein	1.00174	0.18922	0.96874
orf19.5762_RC	ORF19.5762	PGA61	Putative GPI-anchored protein	-1.02802	-0.22226	0.66277
orf19.5764	ORF19.5764	SKI8	Ortholog(s) have role in nuclear-transcribed mRNA catabolic process, 3'-5' exonucleolytic nonsense-mediated decay, nuclear-transcribed mRNA catabolic process, non-stop decay and protein complex assembly, more	-1.05638	-0.43115	0.17482
orf19.5764_RC	ORF19.5764	SKI8	Ortholog(s) have role in nuclear-transcribed mRNA catabolic process, 3'-5' exonucleolytic nonsense-mediated decay, nuclear-transcribed mRNA catabolic process, non-stop decay and protein complex assembly, more	-1.0035	-0.04113	0.62513
orf19.5844	ORF19.5844	ORF19.5844	Ortholog(s) have role in meiotic DNA recombinase assembly, reciprocal meiotic recombination and condensed nuclear chromosome localization	-1.03232	-0.23461	0.62946
orf19.5844_RC	ORF19.5844	ORF19.5844	Ortholog(s) have role in meiotic DNA recombinase assembly, reciprocal meiotic recombination and condensed nuclear chromosome localization	1.01028	-0.0104	0.50951
orf19.5848	ORF19.5848	ORF19.5848	Late-stage biofilm-induced gene; oral infection upregulated gene; mutants have reduced capacity to damage oral epithelial cells	-1.05487	-0.52736	0.00347
orf19.5848_RC	ORF19.5848	ORF19.5848	Late-stage biofilm-induced gene; oral infection upregulated gene; mutants have reduced capacity to damage oral epithelial cells	-1.05084	-0.42923	0.44311
orf19.5849	ORF19.5849	CWT1	Zn2Cys6 transcription factor involved in negative regulation of nitrosative stress response; mutant has cell wall defects; transcription increased at stationary phase; has predicted PAS domain; similar to S. cerevisiae Rds2p	-1.0996	-0.89572	0.32687
orf19.5849_RC	ORF19.5849	CWT1	Zn2Cys6 transcription factor involved in negative regulation of nitrosative stress response; mutant has cell wall defects; transcription increased at stationary phase; has predicted PAS domain; similar to S. cerevisiae Rds2p	-1.03786	-0.46964	0.17475
orf19.5855	ORF19.5855	MBP1	Putative component of the MBF transcription complex involved in G1/S cell-cycle progression; non-periodic mRNA expression; predicted, conserved MBF binding sites upstream of G1/S-regulated genes	-1.00009	-0.06851	0.98845
orf19.5855_RC	ORF19.5855	MBP1	Putative component of the MBF transcription complex involved in G1/S cell-cycle progression; non-periodic mRNA expression; predicted, conserved MBF binding sites upstream of G1/S-regulated genes	1.0945	1.00851	0.08079
orf19.59	ORF19.59	REI1	Putative cytoplasmic pre-60S factor; Hap43p-induced gene; decreased expression in response to prostaglandins	1.05176	0.8439	0.52409
orf19.59_RC	ORF19.59	REI1	Putative cytoplasmic pre-60S factor; Hap43p-induced gene; decreased expression in response to prostaglandins	1.06711	1.03017	0.40549
orf19.5917	ORF19.5917	STP3	Transcription factor; regulates SAP2, OPT1 expression and thereby protein catabolism for nitrogen source; activated via amino-acid-induced proteolytic processing; macrophage/pseudohyphal-repressed	1.0429	0.72027	0.13368
orf19.5917_RC	ORF19.5917	STP3	Transcription factor; regulates SAP2, OPT1 expression and thereby protein catabolism for nitrogen source; activated via amino-acid-induced proteolytic processing; macrophage/pseudohyphal-repressed	1.00752	0.27147	0.82522
orf19.5940	ORF19.5940	ZCF32	Predicted zinc-finger protein; possibly an essential gene, disruptants not obtained by UAU1 method; Hap43p-repressed gene	-1.06215	-0.63093	0.05643
orf19.5940_RC	ORF19.5940	ZCF32	Predicted zinc-finger protein; possibly an essential gene, disruptants not obtained by UAU1 method; Hap43p-repressed gene	-1.06603	-0.69474	0.04097
orf19.5953	ORF19.5953	ORF19.5953	Putative transcription factor; possibly an essential gene, disruptants not obtained by UAU1 method	-1.14642	-1.60753	0.08954
orf19.5953_RC	ORF19.5953	ORF19.5953	Putative transcription factor; possibly an essential gene, disruptants not obtained by UAU1 method	-1.13093	-1.34901	0.1229
orf19.5954	ORF19.5954	ORF19.5954	Ortholog(s) have enzyme activator activity, role in ascospore wall assembly, meiosis I, positive regulation of protein catabolic process and anaphase-promoting complex localization	-1.04851	-0.44758	0.3125
orf19.5954_RC	ORF19.5954	ORF19.5954	Ortholog(s) have enzyme activator activity, role in ascospore wall assembly, meiosis I, positive regulation of protein catabolic process and anaphase-promoting complex localization	-1.01499	-0.0187	0.84928
orf19.5956	ORF19.5956	PIN3	Putative SH3-domain-containing protein	1.02849	-0.17756	0.74814
orf19.5956_RC	ORF19.5956	PIN3	Putative SH3-domain-containing protein	1.02346	-0.2153	0.84021
orf19.5968	ORF19.5968	RDI1	Putative rho GDP dissociation inhibitor; transposon mutation affects filamentous growth; farnesol-, filament-induced; regulated by Nrg1p, Tup1p; protein levels decrease in stationary phase yeast cultures	-1.09795	-1.03094	0.06128
orf19.5968_RC	ORF19.5968	RDI1	Putative rho GDP dissociation inhibitor; transposon mutation affects filamentous growth; farnesol-, filament-induced; regulated by Nrg1p, Tup1p; protein levels decrease in stationary phase yeast cultures	-1.12484	-1.01381	0.24434
orf19.5975	ORF19.5975	TRY4	Putative zinc finger DNA-binding transcription factor; fluconazole-downregulated; expression regulated during planktonic growth; expression upregulated in an ssr1 mutant; required for yeast cell adherence to silicone substrate	-1.01657	-0.03919	0.44344
orf19.5975_RC	ORF19.5975	TRY4	Putative zinc finger DNA-binding transcription factor; fluconazole-downregulated; expression regulated during planktonic growth; expression upregulated in an ssr1 mutant; required for yeast cell adherence to silicone substrate	-1.06094	-0.60312	0.29115
orf19.6028	ORF19.6028	HGC1	Hypha-specific G1 cyclin-related protein involved in regulation of hyphal morphogenesis; Cdc28p-Hgc1p maintains Cdc11p S394 phosphorylation during hyphal growth; required for virulence in mouse model; regulated by Nrg1p, Tup1p, farnesol	-1.04374	-0.30415	0.14715
orf19.6028_RC	ORF19.6028	HGC1	Hypha-specific G1 cyclin-related protein involved in regulation of hyphal morphogenesis; Cdc28p-Hgc1p maintains Cdc11p S394 phosphorylation during hyphal growth; required for virulence in mouse model; regulated by Nrg1p, Tup1p, farnesol	-1.02656	-0.189	0.63205
orf19.6038	ORF19.6038	UGA32	Predicted zinc-finger protein; has similarity to S. cerevisiae Uga3p, which is a transcription factor involved in the regulation of gamma-aminobutyrate metabolism genes	-1.10264	-0.93688	0.23253
orf19.6038_RC	ORF19.6038	UGA32	Predicted zinc-finger protein; has similarity to S. cerevisiae Uga3p, which is a transcription factor involved in the regulation of gamma-aminobutyrate metabolism genes	-1.03219	-0.3931	0.23122
orf19.6081	ORF19.6081	PHR2	Glycosidase; role in cell wall structure; may act on beta-1,3-glucan prior to beta-1,6-glucan linkage; role in vaginal not systemic virulence (low pH not neutral); low pH, high iron, fluconazole, Hap43p-induced; Rim101p-downregulated at pH8	1.1306	1.77931	0.08358
orf19.6081_RC	ORF19.6081	PHR2	Glycosidase; role in cell wall structure; may act on beta-1,3-glucan prior to beta-1,6-glucan linkage; role in vaginal not systemic virulence (low pH not neutral); low pH, high iron, fluconazole, Hap43p-induced; Rim101p-downregulated at pH8	1.06806	1.0267	0.17127
orf19.6102	ORF19.6102	RCA1	Protein involved in regulation of carbonic anhydrases; controls CO2 sensing; bZIP domain-containing transcription factor of the ATF/CREB family; null mutant displays slow growth, abnormal colony morphology and invasive growth	1.09797	0.34198	0.09489
orf19.6102_RC	ORF19.6102	RCA1	Protein involved in regulation of carbonic anhydrases; controls CO2 sensing; bZIP domain-containing transcription factor of the ATF/CREB family; null mutant displays slow growth, abnormal colony morphology and invasive growth	-1.11128	-1.20564
orf19.6109	ORF19.6109	TUP1	Transcriptional corepressor with C-terminal WD40 repeats; represses filamentous growth, regulates phase switching, roles in germ tube induction, farnesol response; farnesol upregulated in biofilm; in repression pathways with Nrg1p, Rfg1p	-1.03301	-0.2509	0.24238
orf19.6109_RC	ORF19.6109	TUP1	Transcriptional corepressor with C-terminal WD40 repeats; represses filamentous growth, regulates phase switching, roles in germ tube induction, farnesol response; farnesol upregulated in biofilm; in repression pathways with Nrg1p, Rfg1p	1.03216	0.60311	0.15143
orf19.6124	ORF19.6124	ACE2	Transcription factor involved in regulation of morphogenesis, cell separation, adherence, biofilm formation, and virulence in a mouse model of infection; mutant is hyperfilamentous; similar to S. cerevisiae Ace2p and Swi5p	-1.11397	-0.99021	0.32609
orf19.6124_RC	ORF19.6124	ACE2	Transcription factor involved in regulation of morphogenesis, cell separation, adherence, biofilm formation, and virulence in a mouse model of infection; mutant is hyperfilamentous; similar to S. cerevisiae Ace2p and Swi5p	-1.07042	-0.79785	0.23849
orf19.6133	ORF19.6133	PIF1	Putative DNA helicase; decreased transcription is observed upon fluphenazine treatment	-1.11529	-0.95781	0.15197
orf19.6133_RC	ORF19.6133	PIF1	Putative DNA helicase; decreased transcription is observed upon fluphenazine treatment	-1.13554	-1.15664	0.06365
orf19.6142	ORF19.6142	ORF19.6142	Ortholog(s) have double-stranded DNA binding activity, role in reciprocal meiotic recombination and condensed nuclear chromosome localization	1.05088	-0.01867	0.76276
orf19.6142_RC	ORF19.6142	ORF19.6142	Ortholog(s) have double-stranded DNA binding activity, role in reciprocal meiotic recombination and condensed nuclear chromosome localization	1.16586	0.78262	0.04535
orf19.6163	ORF19.6163	CSE4	Centromeric histone H3 variant involved in structural changes of centromeric nucleosomes during cell cycle; four nucleosomes bind at one centromere, each contains one Cse4p molecule during most of cell cycle, and two molecules in anaphase	1.06198	0.97972	0.48708
orf19.6163_RC	ORF19.6163	CSE4	Centromeric histone H3 variant involved in structural changes of centromeric nucleosomes during cell cycle; four nucleosomes bind at one centromere, each contains one Cse4p molecule during most of cell cycle, and two molecules in anaphase	1.1047	1.50381	0.16012
orf19.6170	ORF19.6170	ORF19.6170	Ortholog(s) have microtubule binding, protein heterodimerization activity, protein homodimerization activity	-1.00795	0.03109	0.2638
orf19.6170_RC	ORF19.6170	ORF19.6170	Ortholog(s) have microtubule binding, protein heterodimerization activity, protein homodimerization activity	1.05753	0.61751	0.16927
orf19.6182	ORF19.6182	ZCF34	Transcription factor with zinc cluster DNA-binding motif; null mutant displays fluconazole sensitivity; Hap43p-repressed gene; mutants display decreased colonization of mouse kidneys; required for yeast cell adherence to silicone substrate	-1.0134	0.00205	0.60381
orf19.6182_RC	ORF19.6182	ZCF34	Transcription factor with zinc cluster DNA-binding motif; null mutant displays fluconazole sensitivity; Hap43p-repressed gene; mutants display decreased colonization of mouse kidneys; required for yeast cell adherence to silicone substrate	1.02025	0.44241	0.54399
orf19.6222	ORF19.6222	SPO22	Ortholog(s) have role in regulation of synaptonemal complex assembly and condensed nuclear chromosome localization	1.11214	1.14779	0.29579
orf19.6222_RC	ORF19.6222	SPO22	Ortholog(s) have role in regulation of synaptonemal complex assembly and condensed nuclear chromosome localization	1.16557	1.53883	0.17688
orf19.6227	ORF19.6227	ORF19.6227	Has domain(s) with predicted nucleic acid binding, zinc ion binding activity and intracellular localization	1.28672	1.5547	0.42476
orf19.6227_RC	ORF19.6227	ORF19.6227	Has domain(s) with predicted nucleic acid binding, zinc ion binding activity and intracellular localization	1.06337	0.07907	0.25532
orf19.6239	ORF19.6239	ORF19.6239	Putative serine/threonine protein kinase; possibly an essential gene, disruptants not obtained by UAU1 method	-1.00619	0.0963	0.81047
orf19.6239_RC	ORF19.6239	ORF19.6239	Putative serine/threonine protein kinase; possibly an essential gene, disruptants not obtained by UAU1 method	-1.01123	-0.01815	0.34212
orf19.6243	ORF19.6243	VPS34	Autophosphorylated class III phosphatidylinositol 3-kinase; required for normal vesicle transport, hyphal growth, fibroblast adherence, virulence in mouse systemic infection; growth-regulated; caspofungin and hydrogen peroxide sensitivity	1.00962	0.30422	0.69877
orf19.6243_RC	ORF19.6243	VPS34	Autophosphorylated class III phosphatidylinositol 3-kinase; required for normal vesicle transport, hyphal growth, fibroblast adherence, virulence in mouse systemic infection; growth-regulated; caspofungin and hydrogen peroxide sensitivity	1.00749	0.27629	0.83753
orf19.6275	ORF19.6275	ORF19.6275	Ortholog(s) have cytosol localization	1.00877	-0.07545	0.84393
orf19.6275_RC	ORF19.6275	ORF19.6275	Ortholog(s) have cytosol localization	-1.05085	-0.55488	0.42114
orf19.6285	ORF19.6285	GLC7	Putative catalytic subunit of type 1 serine/threonine protein phosphatase; regulated by Shp1p; transcriptionally regulated by iron; expression greater in high iron; alternatively spliced intron in 5' UTR	-1.03197	-0.23759	0.41667
orf19.6285_RC	ORF19.6285	GLC7	Putative catalytic subunit of type 1 serine/threonine protein phosphatase; regulated by Shp1p; transcriptionally regulated by iron; expression greater in high iron; alternatively spliced intron in 5' UTR	1.05639	0.90192	0.22058
orf19.6302	ORF19.6302	PGA39	Putative GPI-anchored protein	1.09897	0.33247	0.31699
orf19.6302_RC	ORF19.6302	PGA39	Putative GPI-anchored protein	1.01023	-0.31539	0.93036
orf19.6305	ORF19.6305	ORF19.6305	Hydroxytrimethyllysine aldolase, the second enzyme in the carnitine biosynthesis pathway	-1.02064	-0.09193	0.54204
orf19.6305_RC	ORF19.6305	ORF19.6305	Hydroxytrimethyllysine aldolase, the second enzyme in the carnitine biosynthesis pathway	1.00517	0.24587	0.86835
orf19.6321	ORF19.6321	PGA48	Putative GPI-anchored; adhesin-like protein; similar to S. cerevisiae Spi1p, which is induced at stationary phase; transcriptionally regulated by iron; expression greater in high iron; late-stage biofilm-induced	-1.02121	-0.13469	0.51173
orf19.6321_RC	ORF19.6321	PGA48	Putative GPI-anchored; adhesin-like protein; similar to S. cerevisiae Spi1p, which is induced at stationary phase; transcriptionally regulated by iron; expression greater in high iron; late-stage biofilm-induced	1.09611	1.30901	0.30087
orf19.6365	ORF19.6365	PTP1	Ortholog(s) have protein tyrosine phosphatase activity, role in invasive growth in response to glucose limitation, protein dephosphorylation, pseudohyphal growth and mitochondrion localization	-1.05173	-0.44307	0.4061
orf19.6365_RC	ORF19.6365	PTP1	Ortholog(s) have protein tyrosine phosphatase activity, role in invasive growth in response to glucose limitation, protein dephosphorylation, pseudohyphal growth and mitochondrion localization	1.03474	0.236	0.58619
orf19.6376	ORF19.6376	PTC5	Mitochondrial protein phosphatase of the Type 2C-related family (serine/threonine-specific), involved in drug response and cadmium tolerance	-1.06406	-0.64192	0.52153
orf19.6376_RC	ORF19.6376	PTC5	Mitochondrial protein phosphatase of the Type 2C-related family (serine/threonine-specific), involved in drug response and cadmium tolerance	-1.08684	-0.9215	0.07728
orf19.6407	ORF19.6407	ORF19.6407	Ortholog(s) have role in ribosomal large subunit biogenesis and cytoplasm, cytosolic large ribosomal subunit, preribosome, large subunit precursor localization	-1.04814	-0.47068	0.17445
orf19.6407_RC	ORF19.6407	ORF19.6407	Ortholog(s) have role in ribosomal large subunit biogenesis and cytoplasm, cytosolic large ribosomal subunit, preribosome, large subunit precursor localization	-1.00142	-0.10412	0.67401
orf19.643	ORF19.643	ORF19.643	Ortholog(s) have role in apoptotic process, mitotic spindle elongation, sister chromatid biorientation, spindle checkpoint	-1.01918	-0.53987	0.92652
orf19.643_RC	ORF19.643	ORF19.643	Ortholog(s) have role in apoptotic process, mitotic spindle elongation, sister chromatid biorientation, spindle checkpoint	-1.07222	-0.95668	0.26374
orf19.6472	ORF19.6472	CYP1	Peptidyl-prolyl cis-trans isomerase; cyclosporin A sensitive activity; soluble in hyphae; biofilm induced, macrophage-induced protein; downregulated upon treatment of biofilm with farnesol; present in exponential and stationary phase cells	1.07171	0.1392
orf19.6472_RC	ORF19.6472	CYP1	Peptidyl-prolyl cis-trans isomerase; cyclosporin A sensitive activity; soluble in hyphae; biofilm induced, macrophage-induced protein; downregulated upon treatment of biofilm with farnesol; present in exponential and stationary phase cells	1.07831	0.17025	0.3
orf19.6506	ORF19.6506	ORF19.6506	Ortholog(s) have role in histone deacetylation, negative regulation of antisense RNA transcription, regulation of DNA-dependent DNA replication initiation, transcription elongation from RNA polymerase II promoter	-1.00625	0.04346	0.85687
orf19.6506_RC	ORF19.6506	ORF19.6506	Ortholog(s) have role in histone deacetylation, negative regulation of antisense RNA transcription, regulation of DNA-dependent DNA replication initiation, transcription elongation from RNA polymerase II promoter	-1.04057	-0.36427	0.32713
orf19.6514	ORF19.6514	CUP9	Genecupregulated in clinical isolates from HIV+ patients with oral candidiasis; transcription reduced upon yeast-hyphal switch; ketoconazole-induced; Plc1p-regulated; shows colony morphology-related Ssn6p regulation; biofilm-induced gene	1.04366	-0.06488
orf19.6514_RC	ORF19.6514	CUP9	Genecupregulated in clinical isolates from HIV+ patients with oral candidiasis; transcription reduced upon yeast-hyphal switch; ketoconazole-induced; Plc1p-regulated; shows colony morphology-related Ssn6p regulation; biofilm-induced gene	-1.00538	-0.43498	0.91323
orf19.6537	ORF19.6537	ORF19.6537	Ortholog(s) have role in chromosome segregation and nuclear MIS12/MIND type complex, spindle pole localization	-1.00643	0.09317	0.26016
orf19.6537_RC	ORF19.6537	ORF19.6537	Ortholog(s) have role in chromosome segregation and nuclear MIS12/MIND type complex, spindle pole localization	1.01625	0.38743	0.4542
orf19.6551.1	ORF19.6551.1	STE18	Protein similar to S. cerevisiae Ste18p; expressed in opaque or white MTLa/MTLa or MTLalpha/MTLalpha, but not MTLa/MTLalpha cells; MTLa1p, MTLalpha2p bind promoter region	1.04284	0.73152	0.12871
orf19.6551.1_RC	ORF19.6551.1	STE18	Protein similar to S. cerevisiae Ste18p; expressed in opaque or white MTLa/MTLa or MTLalpha/MTLalpha, but not MTLa/MTLalpha cells; MTLa1p, MTLalpha2p bind promoter region	1.0125	0.32848	0.57103
orf19.6568	ORF19.6568	SMC6	Putative structural maintenance of chromosomes (SMC) protein; Hap43p-induced gene; cell-cycle regulated periodic mRNA expression; S. cerevisiae ortholog is not cell-cycle regulated	-1.05531	-0.5867	0.17001
orf19.6568_RC	ORF19.6568	SMC6	Putative structural maintenance of chromosomes (SMC) protein; Hap43p-induced gene; cell-cycle regulated periodic mRNA expression; S. cerevisiae ortholog is not cell-cycle regulated	-1.13976	-1.555	0.06376
orf19.6573	ORF19.6573	BEM2	Putative Rho1p GTPase activating protein (GAP); serum-induced transcription	1.08404	1.20448	0.1565
orf19.6573_RC	ORF19.6573	BEM2	Putative Rho1p GTPase activating protein (GAP); serum-induced transcription	1.02802	0.54252	0.46321
orf19.658	ORF19.658	GIN1	Protein involved in regulation of DNA-damage-induced filamentous growth; putative component of DNA replication checkpoint; ortholog of S. cerevisiae Mrc1p, an S-phase checkpoint protein; Hap43p-induced gene	-1.03018	-0.21472	0.46226
orf19.658_RC	ORF19.658	GIN1	Protein involved in regulation of DNA-damage-induced filamentous growth; putative component of DNA replication checkpoint; ortholog of S. cerevisiae Mrc1p, an S-phase checkpoint protein; Hap43p-induced gene	1.03687	0.65567	0.35208
orf19.6588	ORF19.6588	NBP2	Protein containing an SH3 domain, involved in vacuolar fusion in hyphae; mutants form multiple germ tubes	-1.0899	-0.74083	0.04963
orf19.6588_RC	ORF19.6588	NBP2	Protein containing an SH3 domain, involved in vacuolar fusion in hyphae; mutants form multiple germ tubes	-1.01485	-0.07428	0.71077
orf19.6589	ORF19.6589	ORF19.6589	Hap43p-induced gene; ortholog of S. cerevisiae SSF2 and SSF1, proteins involved in ribosome biogenesis	-1.09332	-0.88832	0.20045
orf19.6589_RC	ORF19.6589	ORF19.6589	Hap43p-induced gene; ortholog of S. cerevisiae SSF2 and SSF1, proteins involved in ribosome biogenesis	1.04051	0.1665	0.38918
orf19.6610	ORF19.6610	ORF19.6610	Ortholog(s) have microtubule binding, structural constituent of cytoskeleton activity	-1.20324	-1.67447	0.19108
orf19.6610_RC	ORF19.6610	ORF19.6610	Ortholog(s) have microtubule binding, structural constituent of cytoskeleton activity	-1.07869	-0.85255	0.3381
orf19.6638	ORF19.6638	PTC4	Type PP2C serine/threonine phosphatase; localized to mitochondria; mutation causes sensitivity to sodium, potassium and azole drugs; decreased expression in hyphae compared to yeast-form cells	1.07845	0.18743
orf19.6638_RC	ORF19.6638	PTC4	Type PP2C serine/threonine phosphatase; localized to mitochondria; mutation causes sensitivity to sodium, potassium and azole drugs; decreased expression in hyphae compared to yeast-form cells	1.23166	1.20964
orf19.6645	ORF19.6645	HMO1	Transcription factor that binds upstream of genes involved in hexose and ergosterol metabolism and in the cell cycle; activates pseudohyphal growth when expressed in S. cerevisiae; expression repressed in hyphae relative to yeast-form cells	-1.04647	-0.35865	0.32013
orf19.6645_RC	ORF19.6645	HMO1	Transcription factor that binds upstream of genes involved in hexose and ergosterol metabolism and in the cell cycle; activates pseudohyphal growth when expressed in S. cerevisiae; expression repressed in hyphae relative to yeast-form cells	-1.00415	0.05661	0.78119
orf19.6680	ORF19.6680	FGR27	Transcription factor with zinc cluster DNA-binding motif; described as lacking an S. cerevisiae ortholog; transposon mutation affects filamentous growth; required for yeast cell adherence to silicone substrate	-1.01265	-0.00188	0.82049
orf19.6680_RC	ORF19.6680	FGR27	Transcription factor with zinc cluster DNA-binding motif; described as lacking an S. cerevisiae ortholog; transposon mutation affects filamentous growth; required for yeast cell adherence to silicone substrate	1.02806	0.53004	0.36415
orf19.6753	ORF19.6753	ORF19.6753	Predicted ORF in Assemblies 19, 20 and 21; possibly an essential gene, disruptants not obtained by UAU1 method	undetected	undetected
orf19.6753_RC	ORF19.6753	ORF19.6753	Predicted ORF in Assemblies 19, 20 and 21; possibly an essential gene, disruptants not obtained by UAU1 method	1.07544	0.16594	0.18561
orf19.676	ORF19.676	ORF19.676	Ortholog(s) have ATPase activator activity, microtubule plus-end binding, protein homodimerization activity, structural constituent of cytoskeleton activity	-1.13799	-1.52856	0.15357
orf19.676_RC	ORF19.676	ORF19.676	Ortholog(s) have ATPase activator activity, microtubule plus-end binding, protein homodimerization activity, structural constituent of cytoskeleton activity	-1.05864	-0.57447	0.03605
orf19.6760	ORF19.6760	MDS3	TOR signaling pathway component required for growth and hyphal formation at pH 9, for full virulence in a mouse model of systemic infection and for biofilm formation; plays a role in chlamydospore formation	-1.06536	-0.6654	0.28967
orf19.6760_RC	ORF19.6760	MDS3	TOR signaling pathway component required for growth and hyphal formation at pH 9, for full virulence in a mouse model of systemic infection and for biofilm formation; plays a role in chlamydospore formation	-1.03685	-0.47944	0.14451
orf19.6763	ORF19.6763	SLK19	Alkaline-induced protein of plasma membrane; affects cell aggregation, cell wall; similar to S. cerevisiae Slk19p (a kinetochore protein with roles in mitosis, meiosis); required for wild-type virulence in mouse; macrophage-downregulated	-1.02548	-0.16369	0.27574
orf19.6763_RC	ORF19.6763	SLK19	Alkaline-induced protein of plasma membrane; affects cell aggregation, cell wall; similar to S. cerevisiae Slk19p (a kinetochore protein with roles in mitosis, meiosis); required for wild-type virulence in mouse; macrophage-downregulated	1.054	0.57904	0.30314
orf19.6781	ORF19.6781	ZFU2	Transcriptional regulator of yeast form adherence; zinc finger DNA-binding motif; mutants display increased colonization of mouse kidneys; required for yeast cell adherence to silicone substrate	-1.01707	-0.08071	0.47762
orf19.6781_RC	ORF19.6781	ZFU2	Transcriptional regulator of yeast form adherence; zinc finger DNA-binding motif; mutants display increased colonization of mouse kidneys; required for yeast cell adherence to silicone substrate	1.03094	0.51384	0.30992
orf19.6784	ORF19.6784	PGA32	Putative GPI-anchored adhesin-like protein; transcriptionally regulated by iron; expression greater in high iron	1.0278	0.53976	0.42624
orf19.6784_RC	ORF19.6784	PGA32	Putative GPI-anchored adhesin-like protein; transcriptionally regulated by iron; expression greater in high iron	1.0194	0.43136	0.91424
orf19.6792	ORF19.6792	RRD1	Putative peptidyl-prolyl cis/trans-isomerase; caspofungin induced	1.00682	0.11692	0.91701
orf19.6792_RC	ORF19.6792	RRD1	Putative peptidyl-prolyl cis/trans-isomerase; caspofungin induced	1.01723	0.20055	0.68152
orf19.681	ORF19.681	HAP43	CCAAT-binding factor-dependent transcriptional repressor required for low iron response; similar to bZIP transcription factor AP-1; HAP4L-bZIP bipartite domain; gene negatively regulated by Sfu1p; ciclopirox olamine induced	-1.02735	-0.22335	0.77354
orf19.681_RC	ORF19.681	HAP43	CCAAT-binding factor-dependent transcriptional repressor required for low iron response; similar to bZIP transcription factor AP-1; HAP4L-bZIP bipartite domain; gene negatively regulated by Sfu1p; ciclopirox olamine induced	-1.06226	-0.61948	0.31226
orf19.6810	ORF19.6810	ORF19.6810	Ortholog(s) have protein serine/threonine phosphatase activity and role in establishment or maintenance of cytoskeleton polarity, mitotic cell cycle spindle assembly checkpoint, regulation of translation	-1.04122	-0.39777	0.60837
orf19.6810_RC	ORF19.6810	ORF19.6810	Ortholog(s) have protein serine/threonine phosphatase activity and role in establishment or maintenance of cytoskeleton polarity, mitotic cell cycle spindle assembly checkpoint, regulation of translation	1.00382	0.16196	0.09798
orf19.6817	ORF19.6817	FCR1	Zinc cluster transcription factor; negative regulator of fluconazole, ketoconazole, brefeldin A resistance; transposon mutation increases filamentous growth; partially suppresses S. cerevisiae pdr1 pdr3 mutant fluconazole sensitivity	-1.08225	-0.86566	0.00264
orf19.6817_RC	ORF19.6817	FCR1	Zinc cluster transcription factor; negative regulator of fluconazole, ketoconazole, brefeldin A resistance; transposon mutation increases filamentous growth; partially suppresses S. cerevisiae pdr1 pdr3 mutant fluconazole sensitivity	1.00328	0.17195	0.87309
orf19.6821	ORF19.6821	ORF19.6821	Ortholog(s) have ubiquitin-protein ligase activity	-1.0243	-0.31491	0.65225
orf19.6821_RC	ORF19.6821	ORF19.6821	Ortholog(s) have ubiquitin-protein ligase activity	1.01506	-0.06942	0.67416
orf19.6824	ORF19.6824	TRY6	Transcriptional regulator of yeast form adherence; required for yeast cell adherence to silicone substrate; possibly C. albicans-specific; induced in biofilm; transcription repressed in response to alpha pheromone in SpiderM medium	-1.07269	-0.7485	0.37146
orf19.6824_RC	ORF19.6824	TRY6	Transcriptional regulator of yeast form adherence; required for yeast cell adherence to silicone substrate; possibly C. albicans-specific; induced in biofilm; transcription repressed in response to alpha pheromone in SpiderM medium	1.00554	0.22445	0.93346
orf19.684	ORF19.684	ORF19.684	Putative transcription factor with zinc finger DNA-binding motif; heterozygous null mutant exhibits hypersensitivity to parnafungin and cordycepin in the C. albicans fitness test	1.00616	-0.00922	0.56361
orf19.684_RC	ORF19.684	ORF19.684	Putative transcription factor with zinc finger DNA-binding motif; heterozygous null mutant exhibits hypersensitivity to parnafungin and cordycepin in the C. albicans fitness test	-1.0019	-0.06435	0.90499
orf19.6850	ORF19.6850	ORF19.6850	Putative transcription factor with C3HC4 zinc finger DNA-binding motif; not essential for viability	1.10256	0.35256	0.32399
orf19.6850_RC	ORF19.6850	ORF19.6850	Putative transcription factor with C3HC4 zinc finger DNA-binding motif; not essential for viability	undetected	undetected
orf19.6874	ORF19.6874	ORF19.6874	Putative helix-loop-helix (HLH) transcription factor with a role in filamentous growth	-1.16033	-1.32794	0.19783
orf19.6874_RC	ORF19.6874	ORF19.6874	Putative helix-loop-helix (HLH) transcription factor with a role in filamentous growth	-1.05405	-0.51279	0.35728
orf19.6885	ORF19.6885	SPO7	Protein similar to S. cerevisiae Spo7p; transcription is induced in response to alpha pheromone in SpiderM medium	-1.00222	-0.11115	0.81362
orf19.6885_RC	ORF19.6885	SPO7	Protein similar to S. cerevisiae Spo7p; transcription is induced in response to alpha pheromone in SpiderM medium	1.04916	0.19003	0.23968
orf19.6889	ORF19.6889	MKK2	Protein similar to S. cerevisiae Mkk2p, a MAP kinase kinase involved in signal transduction; macrophage-downregulated gene; mutant is hypersensitive to caspofungin; not essential for viability	1.00321	0.22007	0.71952
orf19.6889_RC	ORF19.6889	MKK2	Protein similar to S. cerevisiae Mkk2p, a MAP kinase kinase involved in signal transduction; macrophage-downregulated gene; mutant is hypersensitive to caspofungin; not essential for viability	1.03283	0.5869	0.40894
orf19.6901	ORF19.6901	ORF19.6901	Ortholog(s) have enzyme activator activity, m7G(5')pppN diphosphatase activity	-1.05288	-0.50239	0.50012
orf19.6901_RC	ORF19.6901	ORF19.6901	Ortholog(s) have enzyme activator activity, m7G(5')pppN diphosphatase activity	-1.00111	0.16313	0.98131
orf19.6915	ORF19.6915	MRE11	Putative DNA double-strand break repair factor; involved in response to oxidative stress and drug resistance	-1.15956	-1.35275	0.13743
orf19.6915_RC	ORF19.6915	MRE11	Putative DNA double-strand break repair factor; involved in response to oxidative stress and drug resistance	-1.10737	-1.01258	0.12777
orf19.6926	ORF19.6926	CSC25	Guanyl-nucleotide exchange factor; activator of Ras/adenylyl cyclase pathway; functional homolog of S. cerevisiae Cdc25p; transposon mutation affects filamentous growth	1.09441	1.36863	0.12343
orf19.6926_RC	ORF19.6926	CSC25	Guanyl-nucleotide exchange factor; activator of Ras/adenylyl cyclase pathway; functional homolog of S. cerevisiae Cdc25p; transposon mutation affects filamentous growth	1.05131	0.83828	0.40541
orf19.6936	ORF19.6936	RAD53	Protein involved in regulation of DNA-damage-induced filamentous growth; putative component of cell cycle checkpoint; ortholog of S. cerevisiae Rad53p, protein kinase required for cell-cycle arrest in response to DNA damage	-1.80655	-7.62934	0.00186
orf19.6936_RC	ORF19.6936	RAD53	Protein involved in regulation of DNA-damage-induced filamentous growth; putative component of cell cycle checkpoint; ortholog of S. cerevisiae Rad53p, protein kinase required for cell-cycle arrest in response to DNA damage	-1.6379	-5.97881	0.00372
orf19.696	ORF19.696	STE2	Receptor for alpha factor mating pheromone, MFalpha; required for a-type cells to respond to alpha factor, for opaque a-form mating and white a-form response; possible Kex2p substrate; a-specific, alpha-factor induced, A1p-Alpha2p repressed	-1.06559	-0.6737	0.49682
orf19.696_RC	ORF19.696	STE2	Receptor for alpha factor mating pheromone, MFalpha; required for a-type cells to respond to alpha factor, for opaque a-form mating and white a-form response; possible Kex2p substrate; a-specific, alpha-factor induced, A1p-Alpha2p repressed	1.05562	0.60089	0.17773
orf19.6980	ORF19.6980	ORF19.6980	Has domain(s) with predicted ATP binding, protein serine/threonine kinase activity and role in protein phosphorylation	-1.09254	-0.99055	0.16859
orf19.6980_RC	ORF19.6980	ORF19.6980	Has domain(s) with predicted ATP binding, protein serine/threonine kinase activity and role in protein phosphorylation	1.00108	0.18027	0.98843
orf19.6987	ORF19.6987	DNM1	Putative dynamin-related GTPase; transcription is upregulated in an RHE model of oral candidiasis; transcription is regulated by Nrg1p, Mig1p, and Tup1p	-1.04834	-0.41287	0.16212
orf19.6987_RC	ORF19.6987	DNM1	Putative dynamin-related GTPase; transcription is upregulated in an RHE model of oral candidiasis; transcription is regulated by Nrg1p, Mig1p, and Tup1p	-1.05136	-0.58683	0.1182
orf19.6995	ORF19.6995	ATO6	Putative fungal-specific transmembrane protein	1.04076	-0.08628	0.53248
orf19.6995_RC	ORF19.6995	ATO6	Putative fungal-specific transmembrane protein	1.04927	0.01644	0.22821
orf19.6997	ORF19.6997	ATO5	Putative fungal-specific transmembrane protein	-1.05207	-0.4758	0.2536
orf19.6997_RC	ORF19.6997	ATO5	Putative fungal-specific transmembrane protein	1.17292	2.34579	0.13228
orf19.7017	ORF19.7017	YOX1	Putative homeodomain-containing transcriptional repressor; periodic mRNA expression, peak at cell-cycle G1/S phase	1.15777	0.73359	0.41386
orf19.7017_RC	ORF19.7017	YOX1	Putative homeodomain-containing transcriptional repressor; periodic mRNA expression, peak at cell-cycle G1/S phase	1.29953	1.62243
orf19.702	ORF19.702	ORF19.702	Ortholog(s) have DNA helicase activity, role in regulation of translational termination and polysome localization	-1.04517	-0.40542	0.40387
orf19.702_RC	ORF19.702	ORF19.702	Ortholog(s) have DNA helicase activity, role in regulation of translational termination and polysome localization	-1.02115	-0.09856	0.85026
orf19.703	ORF19.703	ORF19.703	Ortholog(s) have 2',3'-cyclic-nucleotide 3'-phosphodiesterase activity, role in cyclic nucleotide metabolic process and clathrin-coated vesicle localization	-1.01921	-0.0734	0.88134
orf19.703_RC	ORF19.703	ORF19.703	Ortholog(s) have 2',3'-cyclic-nucleotide 3'-phosphodiesterase activity, role in cyclic nucleotide metabolic process and clathrin-coated vesicle localization	1.07515	1.06469	0.23775
orf19.7033	ORF19.7033	ORF19.7033	Putative dual specificity protein phosphatase, similar to S. cerevisiae Pps1p	1.01465	0.3698	0.73219
orf19.7033_RC	ORF19.7033	ORF19.7033	Putative dual specificity protein phosphatase, similar to S. cerevisiae Pps1p	-1.03075	-0.22203	0.7559
orf19.7044	ORF19.7044	RIM15	Ortholog(s) have protein kinase activity, role in age-dependent response to oxidative stress involved in chronological cell aging, protein phosphorylation, regulation of meiosis and cytosol, nucleus localization	1.09125	1.33047	0.44854
orf19.7044_RC	ORF19.7044	RIM15	Ortholog(s) have protein kinase activity, role in age-dependent response to oxidative stress involved in chronological cell aging, protein phosphorylation, regulation of meiosis and cytosol, nucleus localization	-1.01806	-0.05849	0.47532
orf19.7081	ORF19.7081	SPL1	Protein similar to S. cerevisiae Spl1p, which is involved in tRNA splicing; member of pyridoxal-phosphate-dependent aminotransferase protein family; predicted to be essential	-1.0678	-0.67482	0.10748
orf19.7081_RC	ORF19.7081	SPL1	Protein similar to S. cerevisiae Spl1p, which is involved in tRNA splicing; member of pyridoxal-phosphate-dependent aminotransferase protein family; predicted to be essential	-1.14697	-1.72585	0.12513
orf19.71	ORF19.71	ORF19.71	Ortholog(s) have role in ER to Golgi vesicle-mediated transport, protein secretion and COPII vesicle coat, cell division site, cell tip, cis-Golgi network, cytosol, nucleus localization	1.04702	-0.04012	0.7846
orf19.71_RC	ORF19.71	ORF19.71	Ortholog(s) have role in ER to Golgi vesicle-mediated transport, protein secretion and COPII vesicle coat, cell division site, cell tip, cis-Golgi network, cytosol, nucleus localization	-1.1093	-1.19186	0.56027
orf19.7105	ORF19.7105	FAR1	Protein involved in regulation of pheromone-mediated mating; repressed by A1p and Alpha2p in white-phase cells; null mutant shows no pheromone response in opaque cells; overexpression causes enhanced pheromone response and cell cycle arrest	-1.00442	0.10533	0.93983
orf19.7105_RC	ORF19.7105	FAR1	Protein involved in regulation of pheromone-mediated mating; repressed by A1p and Alpha2p in white-phase cells; null mutant shows no pheromone response in opaque cells; overexpression causes enhanced pheromone response and cell cycle arrest	-1.01159	0.00472	0.79776
orf19.7114	ORF19.7114	CSA1	Surface antigen on elongating hyphae and buds; no obvious hyphal defects in mutant; strain variation in repeat domain number; upregulated in filaments; alkaline upregulated by Rim101p; ciclopirox induced; Efg1p-, Cph1p, Hap43p-regulated	1.19769	0.99443	0.08712
orf19.7114_RC	ORF19.7114	CSA1	Surface antigen on elongating hyphae and buds; no obvious hyphal defects in mutant; strain variation in repeat domain number; upregulated in filaments; alkaline upregulated by Rim101p; ciclopirox induced; Efg1p-, Cph1p, Hap43p-regulated	1.2744	1.47215
orf19.7115	ORF19.7115	SAC7	Putative GTPase activating protein (GAP) for RHO1; downregulated upon adherence to polystyrene; macrophage/pseudohyphal-repressed; transcription is upregulated in RHE model of oral candidiasis and in clinical oral candidiasis	-1.02943	-0.21071	0.36129
orf19.7115_RC	ORF19.7115	SAC7	Putative GTPase activating protein (GAP) for RHO1; downregulated upon adherence to polystyrene; macrophage/pseudohyphal-repressed; transcription is upregulated in RHE model of oral candidiasis and in clinical oral candidiasis	1.03942	0.65474	0.07453
orf19.7150	ORF19.7150	NRG1	Transcriptional repressor; regulates chlamydospore development, hyphal gene induction, virulence genes, and genes involved in rescue/stress responses; effects both Tup1p-dependent (major) and -independent (minor) regulation; biofilm-induced	1.02963	0.55926	0.10132
orf19.7150_RC	ORF19.7150	NRG1	Transcriptional repressor; regulates chlamydospore development, hyphal gene induction, virulence genes, and genes involved in rescue/stress responses; effects both Tup1p-dependent (major) and -independent (minor) regulation; biofilm-induced	1.07179	1.08919	0.00296
orf19.7164	ORF19.7164	ORF19.7164	Ortholog(s) have role in vacuolar protein processing and Golgi apparatus, endoplasmic reticulum, fungal-type vacuole membrane localization	-1.01522	-0.27131	0.82701
orf19.7164_RC	ORF19.7164	ORF19.7164	Ortholog(s) have role in vacuolar protein processing and Golgi apparatus, endoplasmic reticulum, fungal-type vacuole membrane localization	1.07237	0.7207	0.13884
orf19.718	ORF19.718	RRN11	Putative RNA polymerase I subunit; transcription is upregulated in both intermediate and mature biofilms	-1.00067	0.10938	0.90776
orf19.718_RC	ORF19.718	RRN11	Putative RNA polymerase I subunit; transcription is upregulated in both intermediate and mature biofilms	-1.06395	-0.51766	0.43677
orf19.719	ORF19.719	ORF19.719	Ortholog(s) have ubiquitin-protein ligase activity and role in ER-associated protein catabolic process, fungal-type cell wall organization, negative regulation of transcription by transcription factor catabolism	-1.03345	-0.20978	0.37625
orf19.719_RC	ORF19.719	ORF19.719	Ortholog(s) have ubiquitin-protein ligase activity and role in ER-associated protein catabolic process, fungal-type cell wall organization, negative regulation of transcription by transcription factor catabolism	-1.02064	-0.14198	0.24823
orf19.7195	ORF19.7195	RAD6	Negative regulator of hyphal growth; required for wild-type UV resistance; acts in pathway with Efg1p ; functional homolog of S. cerevisiae Rad6p; transcription is UV-induced, slightly repressed during hyphal growth; gene has two introns	-1.15389	-1.3521	0.18793
orf19.7195_RC	ORF19.7195	RAD6	Negative regulator of hyphal growth; required for wild-type UV resistance; acts in pathway with Efg1p ; functional homolog of S. cerevisiae Rad6p; transcription is UV-induced, slightly repressed during hyphal growth; gene has two introns	1.0941	0.52024	0.11457
orf19.7208	ORF19.7208	CSK1	Putative mitogen-activated protein (MAP) kinase with an unknown role; null mutant produces wrinkled colonies; similar to S. cerevisiae Smk1p, which is a protein kinase required for sporulation	-1.0678	-0.64013	0.09594
orf19.7208_RC	ORF19.7208	CSK1	Putative mitogen-activated protein (MAP) kinase with an unknown role; null mutant produces wrinkled colonies; similar to S. cerevisiae Smk1p, which is a protein kinase required for sporulation	-1.12998	-1.22302	0.06008
orf19.7227	ORF19.7227	ORF19.7227	Putative protein phosphatase inhibitor; Hap43p-repressed; homozygous transposon insertion decreases colony wrinkling but does not block true hyphal growth in liquid media; mutation confers hypersensitivity to toxic ergosterol analog	1.05187	-0.01422	0.73916
orf19.7227_RC	ORF19.7227	ORF19.7227	Putative protein phosphatase inhibitor; Hap43p-repressed; homozygous transposon insertion decreases colony wrinkling but does not block true hyphal growth in liquid media; mutation confers hypersensitivity to toxic ergosterol analog	1.22313	1.16645	0.493
orf19.723	ORF19.723	BCR1	C2H2 zinc finger transcription factor; master regulator of biofilm formation; mutation affects filamentous growth, adherence; regulates cell-surface-associated genes; filament induced; Tup1p-, Tec1p-, Mnl1p-regulated; mRNA binds to She3p	-1.12321	-0.99867	0.31827
orf19.723_RC	ORF19.723	BCR1	C2H2 zinc finger transcription factor; master regulator of biofilm formation; mutation affects filamentous growth, adherence; regulates cell-surface-associated genes; filament induced; Tup1p-, Tec1p-, Mnl1p-regulated; mRNA binds to She3p	1.04406	0.74681	0.42778
orf19.7234	ORF19.7234	ORF19.7234	Putative RSC chromatin remodeling complex component; possibly an essential gene, disruptants not obtained by UAU1 method	1.00957	0.30346	0.84181
orf19.7234_RC	ORF19.7234	ORF19.7234	Putative RSC chromatin remodeling complex component; possibly an essential gene, disruptants not obtained by UAU1 method	1.00759	0.27763	0.93143
orf19.7250	ORF19.7250	ORF19.7250	Ortholog of C. parapsilosis CDC317 : CPAR2_700430, Candida tenuis NRRL Y-1498 : CANTEDRAFT_115109, Debaryomyces hansenii CBS767 : DEHA2D04730g and Candida dubliniensis CD36 : CD36_13320	-1.15312	-1.29635	0.16229
orf19.7250_RC	ORF19.7250	ORF19.7250	Ortholog of C. parapsilosis CDC317 : CPAR2_700430, Candida tenuis NRRL Y-1498 : CANTEDRAFT_115109, Debaryomyces hansenii CBS767 : DEHA2D04730g and Candida dubliniensis CD36 : CD36_13320	-1.03647	-0.2281	0.27687
orf19.7251	ORF19.7251	WSC4	Putative cell wall integrity and stress response subunit 4 precursor; transcription is specific to white cell type	-1.10947	-0.90708	0.08504
orf19.7251_RC	ORF19.7251	WSC4	Putative cell wall integrity and stress response subunit 4 precursor; transcription is specific to white cell type	-1.02686	-0.26541	0.48518
orf19.7257	ORF19.7257	ORF19.7257	Ortholog(s) have role in mismatch repair, reciprocal meiotic recombination and MutLbeta complex localization	1.04751	-0.01745	0.01762
orf19.7257_RC	ORF19.7257	ORF19.7257	Ortholog(s) have role in mismatch repair, reciprocal meiotic recombination and MutLbeta complex localization	-1.09215	-1.06841	0.01261
orf19.726	ORF19.726	PPZ1	Protein phosphatase Z; type 1 family serine/threonine specific protein phosphatase involved in cation homeostasis and cell wall integrity	-1.04759	-0.34747	0.5833
orf19.726_RC	ORF19.726	PPZ1	Protein phosphatase Z; type 1 family serine/threonine specific protein phosphatase involved in cation homeostasis and cell wall integrity	1.00313	0.15682	0.9578
orf19.7281	ORF19.7281	PDK2	Putative pyruvate dehydrogenase kinase; mutation confers hypersensitivity to amphotericin B	-1.0434	-0.38309	0.05689
orf19.7281_RC	ORF19.7281	PDK2	Putative pyruvate dehydrogenase kinase; mutation confers hypersensitivity to amphotericin B	-1.01787	-0.0561	0.72337
orf19.7308	ORF19.7308	TUB1	Alpha-tubulin; gene has intron; complements cold-sensitivity of S. cerevisiae tub1 mutant; C. albicans has single alpha-tubulin gene, whereas S. cerevisiae has two (TUB1, TUB3); farnesol-upregulated in biofilm; sumoylation target	-1.07198	-0.68056	0.24189
orf19.7308_RC	ORF19.7308	TUB1	Alpha-tubulin; gene has intron; complements cold-sensitivity of S. cerevisiae tub1 mutant; C. albicans has single alpha-tubulin gene, whereas S. cerevisiae has two (TUB1, TUB3); farnesol-upregulated in biofilm; sumoylation target	-1.02142	-0.34105	0.53967
orf19.7310	ORF19.7310	ORF19.7310	Protein similar to S. cerevisiae Gin3p; transcription is upregulated in response to treatment with ciclopirox olamine; positively regulated by Sfu1p; Hog1p, fluconazole-downregulated; Hap43p-induced	-1.06391	-0.61222	0.21648
orf19.7310_RC	ORF19.7310	ORF19.7310	Protein similar to S. cerevisiae Gin3p; transcription is upregulated in response to treatment with ciclopirox olamine; positively regulated by Sfu1p; Hog1p, fluconazole-downregulated; Hap43p-induced	1.04802	0.34815	0.55226
orf19.7317	ORF19.7317	UGA33	Zinc-finger transcription factor; similar to S. cerevisiae Uga3p which regulates gamma-aminobutyrate metabolism gene expression; required for yeast cell adherence to silicone substrate	-1.11878	-1.30383	0.12396
orf19.7317_RC	ORF19.7317	UGA33	Zinc-finger transcription factor; similar to S. cerevisiae Uga3p which regulates gamma-aminobutyrate metabolism gene expression; required for yeast cell adherence to silicone substrate	-1.04921	-0.45205	0.04408
orf19.7319	ORF19.7319	SUC1	Zinc-finger transcription factor; regulates alpha-glucosidase exression; complements S. cerevisiae suc2 mutant sucrose utilization defect and mal13 mutant maltase defect; required for yeast cell adherence to silicone substrate	1.00211	-0.02251	0.86162
orf19.7319_RC	ORF19.7319	SUC1	Zinc-finger transcription factor; regulates alpha-glucosidase exression; complements S. cerevisiae suc2 mutant sucrose utilization defect and mal13 mutant maltase defect; required for yeast cell adherence to silicone substrate	1.02181	0.22037	0.72707
orf19.7355	ORF19.7355	SSN8	Protein similar to S. cerevisiae Ssn8p, a component of RNA polymerase II holoenzyme; mutants are sensitive to hydrogen peroxide medium; not essential for viability	-1.04482	-0.41361	0.06827
orf19.7355_RC	ORF19.7355	SSN8	Protein similar to S. cerevisiae Ssn8p, a component of RNA polymerase II holoenzyme; mutants are sensitive to hydrogen peroxide medium; not essential for viability	-1.0159	-0.05143	0.63475
orf19.7359	ORF19.7359	CRZ1	Calcineurin-regulated C2H2 zinc-finger transcription factor; role in maintenance of membrane integrity, azole tolerance; not required for mouse virulence; downregulated by low iron; regulates Ca++ influx during alkaline pH response	-1.03995	-0.30114	0.42009
orf19.7359_RC	ORF19.7359	CRZ1	Calcineurin-regulated C2H2 zinc-finger transcription factor; role in maintenance of membrane integrity, azole tolerance; not required for mouse virulence; downregulated by low iron; regulates Ca++ influx during alkaline pH response	-1.00157	0.10653	0.81497
orf19.7372	ORF19.7372	MRR1	Zinc-finger protein; regulator of MDR1 transcription; gain-of-function mutations cause upregulation of MDR1 (a plasma membrane multidrug efflux pump) and consequent multidrug resistance; Hap43p-induced gene	1.05209	0.84805	0.00844
orf19.7372_RC	ORF19.7372	MRR1	Zinc-finger protein; regulator of MDR1 transcription; gain-of-function mutations cause upregulation of MDR1 (a plasma membrane multidrug efflux pump) and consequent multidrug resistance; Hap43p-induced gene	1.02925	0.55835	0.58476
orf19.7374	ORF19.7374	CTA4	Zinc cluster transcription factor; involved in response to nitric oxide; induced by nitric oxide; transcriptionally activated by Mnl1p under weak acid stress; downregulated upon adherence to polystyrene; Hap43p-repressed	1.0251	0.51252	0.06197
orf19.7374_RC	ORF19.7374	CTA4	Zinc cluster transcription factor; involved in response to nitric oxide; induced by nitric oxide; transcriptionally activated by Mnl1p under weak acid stress; downregulated upon adherence to polystyrene; Hap43p-repressed	1.04733	0.76028	0.34213
orf19.7385	ORF19.7385	ORF19.7385	Has domain(s) with predicted nucleic acid binding, zinc ion binding activity	-1.01847	-0.0638	0.47981
orf19.7385_RC	ORF19.7385	ORF19.7385	Has domain(s) with predicted nucleic acid binding, zinc ion binding activity	1.0109	0.31632	0.22235
orf19.7388	ORF19.7388	PBS2	MAPK kinase (MAPKK); role in osmotic and oxidative stress responses, oxidative stress adaptation; required for stress regulation of Hog1p localization and activity; functional homolog of S. cerevisiae Pbs2p	-1.02578	-0.58957
orf19.7388_RC	ORF19.7388	PBS2	MAPK kinase (MAPKK); role in osmotic and oxidative stress responses, oxidative stress adaptation; required for stress regulation of Hog1p localization and activity; functional homolog of S. cerevisiae Pbs2p	1.62639	3.34884
orf19.7402	ORF19.7402	DOT1	Putative modulator of white-opaque switching	-1.03672	-0.29918	0.35718
orf19.7402_RC	ORF19.7402	DOT1	Putative modulator of white-opaque switching	1.06422	0.99404	0.43594
orf19.7414	ORF19.7414	ALS6	ALS family protein; expression in S. cerevisiae confers adhesion to gelatin; macrophage-induced gene; N-terminal adhesion domain; ALS family includes cell-surface glycoproteins, some with adhesin function	1.01641	0.39265	0.51541
orf19.7414_RC	ORF19.7414	ALS6	ALS family protein; expression in S. cerevisiae confers adhesion to gelatin; macrophage-induced gene; N-terminal adhesion domain; ALS family includes cell-surface glycoproteins, some with adhesin function	1.02096	0.45165	0.74868
orf19.7417	ORF19.7417	TSA1	TSA/alkyl hydroperoxide peroxidase C (AhPC) family protein; similar to thiol-dependent peroxidases of oxidative stress signaling; antigenic; hyphal surface, nucleus; yeast-form nucleus, cytoplasm; biofilm, phagocytosis, peroxide induced	-1.03252	-0.20253	0.64235
orf19.7417_RC	ORF19.7417	TSA1	TSA/alkyl hydroperoxide peroxidase C (AhPC) family protein; similar to thiol-dependent peroxidases of oxidative stress signaling; antigenic; hyphal surface, nucleus; yeast-form nucleus, cytoplasm; biofilm, phagocytosis, peroxide induced	1.00931	0.13423	0.20131
orf19.744	ORF19.744	GDB1	Putative glycogen debranching enzyme; expression is regulated upon white-opaque switching; regulated by Nrg1p, Tup1p	1.07305	1.06256	0.33938
orf19.744_RC	ORF19.744	GDB1	Putative glycogen debranching enzyme; expression is regulated upon white-opaque switching; regulated by Nrg1p, Tup1p	-1.03471	-0.2726	0.45632
orf19.7451	ORF19.7451	FUN31	Putative PAS kinase involved in cell wall damage response; similar to S. cerevisiae Psk1p, which is a putative serine/threonine protein kinase; transcriptionally activated by Mnl1p under weak acid stress	1.07967	1.13018	0.28748
orf19.7451_RC	ORF19.7451	FUN31	Putative PAS kinase involved in cell wall damage response; similar to S. cerevisiae Psk1p, which is a putative serine/threonine protein kinase; transcriptionally activated by Mnl1p under weak acid stress	1.0374	0.66253	0.50933
orf19.7472	ORF19.7472	IFF4	Adhesin-like cell surface protein; putative GPI-anchor; null mutant germ tubes show decreased adhesion to plastic substrate; not essential for viability; Hap43p-repressed gene	1.00275	0.21404	0.96692
orf19.7472_RC	ORF19.7472	IFF4	Adhesin-like cell surface protein; putative GPI-anchor; null mutant germ tubes show decreased adhesion to plastic substrate; not essential for viability; Hap43p-repressed gene	1.04082	0.70593	0.61147
orf19.7473	ORF19.7473	ORF19.7473	Ortholog(s) have role in endocytosis and actin cortical patch, cellular bud neck, cytoplasm localization	-1.03642	-0.30392	0.35627
orf19.7473_RC	ORF19.7473	ORF19.7473	Ortholog(s) have role in endocytosis and actin cortical patch, cellular bud neck, cytoplasm localization	-1.02139	-0.37142	0.7586
orf19.7504	ORF19.7504	ORF19.7504	Predicted ORF in Assemblies 19, 20 and 21; Plc1p-regulated; induced in core caspofungin response	-1.06205	-0.62602	0.09849
orf19.7504_RC	ORF19.7504	ORF19.7504	Predicted ORF in Assemblies 19, 20 and 21; Plc1p-regulated; induced in core caspofungin response	1.032	0.60123	0.34963
orf19.7510	ORF19.7510	KIN2	Protein with similarity to S. cerevisiae Kin2p, transcription is positively regulated by Tbf1	-1.01624	-0.03495	0.72989
orf19.7510_RC	ORF19.7510	KIN2	Protein with similarity to S. cerevisiae Kin2p, transcription is positively regulated by Tbf1	1.03525	0.6351	0.7145
orf19.7518	ORF19.7518	ZCF38	Putative transcription factor with zinc cluster DNA-binding motif	-1.04768	-0.38344	0.38051
orf19.7518_RC	ORF19.7518	ZCF38	Putative transcription factor with zinc cluster DNA-binding motif	1.05801	0.62845	0.31118
orf19.7547	ORF19.7547	ORF19.7547	Ortholog(s) have phosphatidylinositol-3-phosphate binding, ubiquitin-protein ligase activity, role in protein ubiquitination and cytosol, fungal-type vacuole membrane, late endosome, nucleus localization	undetected	undetected
orf19.7547_RC	ORF19.7547	ORF19.7547	Ortholog(s) have phosphatidylinositol-3-phosphate binding, ubiquitin-protein ligase activity, role in protein ubiquitination and cytosol, fungal-type vacuole membrane, late endosome, nucleus localization	1.08785	0.25422
orf19.7570	ORF19.7570	UGA3	Putative transcription factor with zinc cluster DNA-binding motif, required for utilization of gamma-aminobutyrate (GABA) as a nitrogen source; mutants display decreased colonization of mouse kidneys	-1.08621	-0.9138	0.02834
orf19.7570_RC	ORF19.7570	UGA3	Putative transcription factor with zinc cluster DNA-binding motif, required for utilization of gamma-aminobutyrate (GABA) as a nitrogen source; mutants display decreased colonization of mouse kidneys	1.01187	0.33355	0.8048
orf19.7583	ORF19.7583	ZCF39	Putative transcription factor with zinc cluster DNA-binding motif; not essential for viability; filament induced; required for yeast cell adherence to silicone substrate	-1.07086	-0.58786	0.10104
orf19.7583_RC	ORF19.7583	ZCF39	Putative transcription factor with zinc cluster DNA-binding motif; not essential for viability; filament induced; required for yeast cell adherence to silicone substrate	-1.0281	-0.13594	0.55539
orf19.7617	ORF19.7617	ORF19.7617	Ortholog(s) have peptide alpha-N-acetyltransferase activity, role in N-terminal protein amino acid acetylation, histone acetylation and NatA complex, cytosol, cytosolic ribosome, nucleus localization	-1.13728	-1.24339	0.0797
orf19.7617_RC	ORF19.7617	ORF19.7617	Ortholog(s) have peptide alpha-N-acetyltransferase activity, role in N-terminal protein amino acid acetylation, histone acetylation and NatA complex, cytosol, cytosolic ribosome, nucleus localization	-1.04692	-0.65497	0.40983
orf19.7625	ORF19.7625	PGA1	Putative GPI-anchored protein; induced during cell wall regeneration; required for normal adhesion to host cells and for adherence during biofilm formation	1.03471	0.62818	0.02779
orf19.7625_RC	ORF19.7625	PGA1	Putative GPI-anchored protein; induced during cell wall regeneration; required for normal adhesion to host cells and for adherence during biofilm formation	1.03099	0.58064	0.63625
orf19.7644	ORF19.7644	ORF19.7644	Ortholog(s) have ubiquitin-protein ligase activity, role in anaphase-promoting complex-dependent proteasomal ubiquitin-dependent protein catabolic process, protein ubiquitination and anaphase-promoting complex localization	-1.00913	0.01556	0.56574
orf19.7644_RC	ORF19.7644	ORF19.7644	Ortholog(s) have ubiquitin-protein ligase activity, role in anaphase-promoting complex-dependent proteasomal ubiquitin-dependent protein catabolic process, protein ubiquitination and anaphase-promoting complex localization	-1.01267	-0.12165	0.86029
orf19.7652	ORF19.7652	CKA1	Putative alpha subunit (catalytic subunit) of protein kinase CK2; Cka1p and Cka2p have a common target with respect to fluconazole resistance; synthetically lethal with CKA2; flucytosine induced	-1.0568	-0.41035	0.14723
orf19.7652_RC	ORF19.7652	CKA1	Putative alpha subunit (catalytic subunit) of protein kinase CK2; Cka1p and Cka2p have a common target with respect to fluconazole resistance; synthetically lethal with CKA2; flucytosine induced	-1.00575	0.04227	0.75653
orf19.7663	ORF19.7663	ORF19.7663	Ortholog(s) have role in homologous chromosome segregation, protein localization to nucleolar rDNA repeats, rDNA condensation and monopolin complex, nuclear envelope, nucleolus localization	1.21354	1.27956	0.72036
orf19.7663_RC	ORF19.7663	ORF19.7663	Ortholog(s) have role in homologous chromosome segregation, protein localization to nucleolar rDNA repeats, rDNA condensation and monopolin complex, nuclear envelope, nucleolus localization	1.37663	2.73562	0.38432
orf19.791	ORF19.791	RIM11	Protein not essential for viability; similar to S. cerevisiae Rim11p, which is a protein kinase involved in meiosis and sporulation	undetected	undetected
orf19.791_RC	ORF19.791	RIM11	Protein not essential for viability; similar to S. cerevisiae Rim11p, which is a protein kinase involved in meiosis and sporulation	1.05084	-0.02166	0.6436
orf19.793	ORF19.793	CAK1	Monomeric CDK-activating kinase; functional homolog of S. cerevisiae Cak1p; phosphorylates cyclin-free human CDK2; lacks glycine loop motif; conserved lysine (K36) not required for activity; possibly essential gene (by UAU1 method)	-1.023	-0.12091	0.3603
orf19.793_RC	ORF19.793	CAK1	Monomeric CDK-activating kinase; functional homolog of S. cerevisiae Cak1p; phosphorylates cyclin-free human CDK2; lacks glycine loop motif; conserved lysine (K36) not required for activity; possibly essential gene (by UAU1 method)	1.03093	0.3033	0.17147
orf19.794	ORF19.794	SSN3	Putative cyclin-dependent protein kinase; mutants are sensitive to growth on H2O2 medium	-1.04919	-0.49982	0.16397
orf19.794_RC	ORF19.794	SSN3	Putative cyclin-dependent protein kinase; mutants are sensitive to growth on H2O2 medium	-1.0096	0.05531	0.67786
orf19.799	ORF19.799	STE4	Beta subunit of heterotrimeric G protein of mating signal transduction pathway; required for mating; transcription is specific to cells homozygous at MTL and is induced by alpha pheromone; similar to S. cerevisiae Ste4p	-1.09521	-0.77252	0.08693
orf19.799_RC	ORF19.799	STE4	Beta subunit of heterotrimeric G protein of mating signal transduction pathway; required for mating; transcription is specific to cells homozygous at MTL and is induced by alpha pheromone; similar to S. cerevisiae Ste4p	1.13389	1.27163	0.08266
orf19.829	ORF19.829	SCH9	Protein kinase involved in growth control, normal cell size, resistance to rapamycin and cations, chlamydospore formation, filamentous growth under some conditions, and virulence; prevents hypha formation under hypoxia at high CO2 levels	-1.1943	-2.27248	0.14829
orf19.829_RC	ORF19.829	SCH9	Protein kinase involved in growth control, normal cell size, resistance to rapamycin and cations, chlamydospore formation, filamentous growth under some conditions, and virulence; prevents hypha formation under hypoxia at high CO2 levels	-1.09307	-1.04821	0.08566
orf19.843	ORF19.843	ORF19.843	Putative DNA repair exonuclease; fungal-specific (no human or murine homolog)	-1.09081	-0.96964	0.29544
orf19.843_RC	ORF19.843	ORF19.843	Putative DNA repair exonuclease; fungal-specific (no human or murine homolog)	-1.08361	-0.8807	0.03068
orf19.844	ORF19.844	STE11	Protein similar to S. cerevisiae Ste11p; mutants are sensitive to growth on H2O2 medium	-1.03796	-0.32217	0.10767
orf19.844_RC	ORF19.844	STE11	Protein similar to S. cerevisiae Ste11p; mutants are sensitive to growth on H2O2 medium	-1.04304	-0.38762	0.62709
orf19.848	ORF19.848	PGA16	Putative GPI-anchored protein	1.02009	0.44039	0.56117
orf19.848_RC	ORF19.848	PGA16	Putative GPI-anchored protein	-1.01638	-0.03673	0.84651
orf19.861	ORF19.861	CAP4	Predicted transcriptional regulator with bZip domain; possibly an essential gene, disruptants not obtained by UAU1 method	-1.10227	-0.94884	0.09077
orf19.861_RC	ORF19.861	CAP4	Predicted transcriptional regulator with bZip domain; possibly an essential gene, disruptants not obtained by UAU1 method	-1.12022	-1.12139	0.16
orf19.876	ORF19.876	PGA33	Putative GPI-anchored protein	-1.0217	-0.12375	0.21106
orf19.876_RC	ORF19.876	PGA33	Putative GPI-anchored protein	1.009	0.29611	0.74782
orf19.878	ORF19.878	NBN1	Subunit of the NuA4 histone acetyltransferase complex; Plc1p-regulated	-1.11459	-0.93862	0.21652
orf19.878_RC	ORF19.878	NBN1	Subunit of the NuA4 histone acetyltransferase complex; Plc1p-regulated	1.01462	0.16853	0.23209
orf19.889	ORF19.889	THI20	Putative phosphomethylpyrimidine kinase; also described as a putative transcription factor with TENA DNA-binding motif; fungal-specific (no human or murine homolog)	1.0428	-0.0712	0.80271
orf19.889_RC	ORF19.889	THI20	Putative phosphomethylpyrimidine kinase; also described as a putative transcription factor with TENA DNA-binding motif; fungal-specific (no human or murine homolog)	1.24976	1.32416	0.15119
orf19.895	ORF19.895	HOG1	MAP kinase of osmotic-, heavy metal-, and core stress response; role in regulation of glycerol, D-arabitol in response to stress; phosphorylated in response to H2O2 (Ssk1p-dependent) or NaCl; mutant induces protective mouse immune response	-1.04966	-0.49895	0.50282
orf19.895_RC	ORF19.895	HOG1	MAP kinase of osmotic-, heavy metal-, and core stress response; role in regulation of glycerol, D-arabitol in response to stress; phosphorylated in response to H2O2 (Ssk1p-dependent) or NaCl; mutant induces protective mouse immune response	1.02637	0.51665	0.53266
orf19.921	ORF19.921	HMS1	Transcriptional regulator required for morphogenesis induced by elevated temperature or Hsp90 compromise; acts downstream of Pcl1p	-1.136	-1.22717	0.27174
orf19.921_RC	ORF19.921	HMS1	Transcriptional regulator required for morphogenesis induced by elevated temperature or Hsp90 compromise; acts downstream of Pcl1p	-1.11403	-1.16123	0.18647
orf19.940	ORF19.940	BUD2	GTPase activating protein (GAP) for Rsr1p; negative regulator of filament branching, acts in hyphal growth guidance; required for wild-type budding pattern; expression greater in low iron; regulated by tyrosol and cell density	1.00607	0.24382	0.55429
orf19.940_RC	ORF19.940	BUD2	GTPase activating protein (GAP) for Rsr1p; negative regulator of filament branching, acts in hyphal growth guidance; required for wild-type budding pattern; expression greater in low iron; regulated by tyrosol and cell density	1.02564	0.51191	0.19398
orf19.967	ORF19.967	ORF19.967	Ortholog(s) have endodeoxyribonuclease activity, exodeoxyribonuclease activity, ribonuclease activity and role in DNA catabolic process, DNA recombination, RNA catabolic process, apoptotic process, cellular response to nitrogen starvation	-1.06506	-0.68654	0.30261
orf19.967_RC	ORF19.967	ORF19.967	Ortholog(s) have endodeoxyribonuclease activity, exodeoxyribonuclease activity, ribonuclease activity and role in DNA catabolic process, DNA recombination, RNA catabolic process, apoptotic process, cellular response to nitrogen starvation	-1.03603	-0.32943	0.22397
orf19.971	ORF19.971	SKN7	Putative homolog of S. cerevisiae Skn7p, which is predicted to be a response regulator protein in a phosphorelay signal transduction pathway; required for normal hydrogen peroxide resistance	-1.05338	-0.53476	0.3582
orf19.971_RC	ORF19.971	SKN7	Putative homolog of S. cerevisiae Skn7p, which is predicted to be a response regulator protein in a phosphorelay signal transduction pathway; required for normal hydrogen peroxide resistance	-1.10589	-1.22753	0.26038
orf19.976	ORF19.976	BRE1	Putative transcription factor with C3HC4 zinc finger DNA-binding motif; similar to S. cerevisiae Bre1p; transposon mutation affects filamentous growth	1.01445	0.3672	0.04064
orf19.976_RC	ORF19.976	BRE1	Putative transcription factor with C3HC4 zinc finger DNA-binding motif; similar to S. cerevisiae Bre1p; transposon mutation affects filamentous growth	-1.00228	0.14771	0.84744
orf19.996	ORF19.996	ORF19.996	Predicted ORF in Assemblies 19, 20 and 21; possibly an essential gene, disruptants not obtained by UAU1 method	-1.00714	0.08384	0.9362
orf19.996_RC	ORF19.996	ORF19.996	Predicted ORF in Assemblies 19, 20 and 21; possibly an essential gene, disruptants not obtained by UAU1 method	1.06356	0.93132	0.07388
PIKalpha	ORF19.10711	PIKALPHA		1.02179	-0.12533
PIKalpha_RC	ORF19.10711	PIKALPHA		1.15483	0.78162	0.44317
