# Supplementary material for: Targeted Changes of the Cell Wall Proteome Influence Candida albicans Ability to Form Single- and Multi-strain Biofilms
Source: PLoS Pathog. 2014 Dec 11;10(12):e1004542. doi: 10.1371/journal.ppat.1004542 (PMC4263760; doi:10.1371/journal.ppat.1004542)
Supplement: S3 Table — Complete fitness profiling data of biofilm growth. Sheet entitled “Complete biofilm data-Arraypipe” includes data analyzed with Arraypipe (See Materials and Methods). Headers: Probe ID, Microarray probe identifier; ORF19 #, orf19 nomenclature from the Assembly 21 version of the Candida albicans genome at the CGD; Gene name, gene name according to CGD; Description, gene description according to CGD; fold change, fold-change abundance of the strain carrying the corresponding ORF treated with doxycycline as compared to untreated control; Z-score, Z-score value of the strain carrying the corresponding ORF; p-student, p-value of the corresponding fold-change value using a Student's t-test (within group). Sheet entitled “GeneSpring analysis-hits p<0.05” includes the statistically significant data analyzed with GeneSpring using a p-value cut-off of <0.05. Headers: ID, Microarray probe identifier; orf19 #, orf19 nomenclature from the Assembly 21 version of the Candida albicans genome at the CGD; Gene name, gene name according to CGD; Description, gene description according to CGD; Fold change, fold-change abundance of the strain carrying the corresponding ORF treated with doxycycline as compared to untreated control; p-student (<0.05), statistically-significant (p<0.05) p-value of the corresponding fold-change value using a Student's t-test (within group). (XLSX) [file ppat.1004542.s013.xlsx]

## Sheet: Complete biofilm data-Arraypipe
Probe ID	ORF19 #	Gene name	Description	fold change	Z-score	p-student
mtlalpha1	ORF19.10712	MTLALPHA1		-1.33705	-0.67023	0.00027
mtlalpha1_RC	ORF19.10712	MTLALPHA1		-1.50295	-0.90589	0.00197
mtlalpha2	MTLALPHA2	MTLALPHA2	Homeodomain protein of MTLalpha (Mating Type Like) locus; alpha2p, together with a1p, repress white-opaque switching and mating (an opaque-specific process); a/alpha mating type may increase virulence, provides competitive advantage	-1.91977	-1.39907	0.00351
mtlalpha2_RC	MTLALPHA2	MTLALPHA2	Homeodomain protein of MTLalpha (Mating Type Like) locus; alpha2p, together with a1p, repress white-opaque switching and mating (an opaque-specific process); a/alpha mating type may increase virulence, provides competitive advantage	-1.6022	-0.98845	0.009
orf19.1002	ORF19.1002	ORF19.1002	Protein of unknown function; Hap43-repressed gene	1.01072	0.82626	0.54537
orf19.1002_RC	ORF19.1002	ORF19.1002	Protein of unknown function; Hap43-repressed gene	-1.065	-0.88462	0.53593
orf19.1028	ORF19.1028	ELA1	Elongin A; F-box protein; ubiquitin-protein ligase; role in protein ubiquitination and ubiquitin-dependent protein catabolism; rat catheter biofilm induced	1.01277	0.87337	0.8715
orf19.1028_RC	ORF19.1028	ELA1	Elongin A; F-box protein; ubiquitin-protein ligase; role in protein ubiquitination and ubiquitin-dependent protein catabolism; rat catheter biofilm induced	-1.06261	-0.83236	0.45221
orf19.1069	ORF19.1069	RPN4	C2H2 transcription factor; putative regulator of proteasome genes; DNA recognition sequence (GAAGGCAAAA) enriched in regions upstream of proteasome genes; induced in core stress response; Hap43-induced; Spider biofilm induced	-1.23223	-0.60988	0.00775
orf19.1069_RC	ORF19.1069	RPN4	C2H2 transcription factor; putative regulator of proteasome genes; DNA recognition sequence (GAAGGCAAAA) enriched in regions upstream of proteasome genes; induced in core stress response; Hap43-induced; Spider biofilm induced	-1.02975	-0.17125	0.35047
orf19.1105.2	ORF19.1105.2	PGA56	Regulator of sorbose utilization; putative GPI-anchor; hypha and cell wall regeneration induced; colony morphology-related gene regulation by Ssn6; induced by Tbf1, Hap43; Spider biofilm induced	2.28781	1.4767	0.00271
orf19.1105.2_RC	ORF19.1105.2	PGA56	Regulator of sorbose utilization; putative GPI-anchor; hypha and cell wall regeneration induced; colony morphology-related gene regulation by Ssn6; induced by Tbf1, Hap43; Spider biofilm induced	3.48714	2.50567	0.00427
orf19.1135	ORF19.1135	CAS1	Putative transcription factor with Ku70/Ku80 beta-barrel DNA-binding motif; involved in telomerase regulation and telomere protection; mutation causes marginal increase in caspofungin sensitivity	-1.00306	0.50756	0.44954
orf19.1135_RC	ORF19.1135	CAS1	Putative transcription factor with Ku70/Ku80 beta-barrel DNA-binding motif; involved in telomerase regulation and telomere protection; mutation causes marginal increase in caspofungin sensitivity	-1.01412	0.25278	0.83501
orf19.115	ORF19.115	ORF19.115	Ortholog of Candida tropicalis MYA-3404 : CTRG_02973 and Candida albicans WO-1 : CAWG_05252	-1.0081	-0.04734	0.92965
orf19.115_RC	ORF19.115	ORF19.115	Ortholog of Candida tropicalis MYA-3404 : CTRG_02973 and Candida albicans WO-1 : CAWG_05252	1.01466	0.91667	0.42942
orf19.1150	ORF19.1150	ORF19.1150	GATA-like transcription factor; oral infection induced; mutant has reduced capacity to damage oral epithelial cells; regulated by Gcn2 and Gcn4; Spider biofilm induced	1.07429	0.05939	0.26529
orf19.1150_RC	ORF19.1150	ORF19.1150	GATA-like transcription factor; oral infection induced; mutant has reduced capacity to damage oral epithelial cells; regulated by Gcn2 and Gcn4; Spider biofilm induced	1.10819	0.1142	0.02665
orf19.1178	ORF19.1178	ORF19.1178	Putative transcription factor with bZIP DNA-binding motif; Hap43p-repressed gene	1.0464	1.6324	0.13561
orf19.1178_RC	ORF19.1178	ORF19.1178	Putative transcription factor with bZIP DNA-binding motif; Hap43p-repressed gene	-1.02783	-0.08417	0.37961
orf19.1187	ORF19.1187	CPH2	Myc-bHLH transcription factor; promotes hyphal growth; directly regulates Tec1 to induce hypha-specific genes; probably homodimeric, phosphorylated; required for colonization of the mouse GI tract; rat catheter and Spider biofilm induced	-2.18189	-1.65693	0.00078
orf19.1187_RC	ORF19.1187	CPH2	Myc-bHLH transcription factor; promotes hyphal growth; directly regulates Tec1 to induce hypha-specific genes; probably homodimeric, phosphorylated; required for colonization of the mouse GI tract; rat catheter and Spider biofilm induced	-1.70292	-1.15757	0.01085
orf19.1189	ORF19.1189	ORF19.1189	Protein of unknown function; regulated by yeast-hypha switch; induced by Mnl1 in weak acid stress; 5' UTR intron; repressed by chlamydospore formation in C. albicans and C. dubliniensis; rat catheter, Spider and flow model biofilm induced	1.05265	0.09947	0.17853
orf19.1189_RC	ORF19.1189	ORF19.1189	Protein of unknown function; regulated by yeast-hypha switch; induced by Mnl1 in weak acid stress; 5' UTR intron; repressed by chlamydospore formation in C. albicans and C. dubliniensis; rat catheter, Spider and flow model biofilm induced	-1.0151	-0.13116	0.35593
orf19.1196	ORF19.1196	ORF19.1196	Ortholog(s) have protein kinase activity and role in MAPK cascade involved in cell wall biogenesis, protein phosphorylation	1.09967	0.10644	0.12497
orf19.1196_RC	ORF19.1196	ORF19.1196	Ortholog(s) have protein kinase activity and role in MAPK cascade involved in cell wall biogenesis, protein phosphorylation	-1.22949	-0.50126	0.01357
orf19.1217	ORF19.1217	ORF19.1217	Ortholog(s) have ribosome binding, ubiquitin-protein ligase activity, role in chromatin modification, chromatin silencing at telomere, protein ubiquitination, ubiquitin-dependent protein catabolic process and nucleus, ribosome localization	-1.22906	-0.59899	0.0016
orf19.1217_RC	ORF19.1217	ORF19.1217	Ortholog(s) have ribosome binding, ubiquitin-protein ligase activity, role in chromatin modification, chromatin silencing at telomere, protein ubiquitination, ubiquitin-dependent protein catabolic process and nucleus, ribosome localization	1.11693	0.17228	0.03565
orf19.1220	ORF19.1220	RVS167	SH3-domain- and BAR domain-containing protein involved in endocytosis; null mutant exhibits defects in hyphal growth, virulence, cell wall integrity, and actin patch localization; cosediments with phosphorylated Myo5p	-1.14473	-0.43359	0.10879
orf19.1220_RC	ORF19.1220	RVS167	SH3-domain- and BAR domain-containing protein involved in endocytosis; null mutant exhibits defects in hyphal growth, virulence, cell wall integrity, and actin patch localization; cosediments with phosphorylated Myo5p	-1.23489	-0.7551	0.03057
orf19.1223	ORF19.1223	DBF2	Essential serine/threonine protein kinase involved in mitotic spindle formation and cytokinesis; required for septum formation, exit from mitosis, and normal hyphal morphogenesis; virulence-group-correlated expression	-1.00267	0.08109	0.34814
orf19.1223_RC	ORF19.1223	DBF2	Essential serine/threonine protein kinase involved in mitotic spindle formation and cytokinesis; required for septum formation, exit from mitosis, and normal hyphal morphogenesis; virulence-group-correlated expression	-1.05297	-0.26009	0.84919
orf19.1224	ORF19.1224	FRP3	Putative ammonium transporter; upregulated in the presence of human neutrophils; fluconazole-downregulated; repressed by nitric oxide; Spider biofilm induced; rat catheter biofilm repressed	-1.06696	-0.92737	0.32845
orf19.1224_RC	ORF19.1224	FRP3	Putative ammonium transporter; upregulated in the presence of human neutrophils; fluconazole-downregulated; repressed by nitric oxide; Spider biofilm induced; rat catheter biofilm repressed	-1.22712	-0.87075	0.01181
orf19.124	ORF19.124	CIC1	Putative proteasome-interacting protein; rat catheter biofilm induced	-3.91938	-2.6782	0.00352
orf19.124_RC	ORF19.124	CIC1	Putative proteasome-interacting protein; rat catheter biofilm induced	-2.16262	-1.63906	0.00281
orf19.1253	ORF19.1253	PHO4	bHLH transcription factor of the myc-family; required for growth in medium lacking phosphate and for resistance to copper and Phloxine B; induced by Mnl1 under weak acid stress	-1.13421	-0.33874	0.00567
orf19.1253_RC	ORF19.1253	PHO4	bHLH transcription factor of the myc-family; required for growth in medium lacking phosphate and for resistance to copper and Phloxine B; induced by Mnl1 under weak acid stress	-1.31982	-0.62034	3.65542e-06
orf19.1259	ORF19.1259	ORF19.1259	Ortholog(s) have DNA binding, ubiquitin-protein ligase activity, role in histone catabolic process, histone ubiquitination and Lid2 complex, Snt2C complex, cytoplasm, mitotic spindle pole body localization	2.00604	1.22803	0.00617
orf19.1259_RC	ORF19.1259	ORF19.1259	Ortholog(s) have DNA binding, ubiquitin-protein ligase activity, role in histone catabolic process, histone ubiquitination and Lid2 complex, Snt2C complex, cytoplasm, mitotic spindle pole body localization	2.3351	1.62424	0.00339
orf19.1275	ORF19.1275	GAT1	GATA-type transcription factor; regulator of nitrogen utilization; required for nitrogen catabolite repression and utilization of isoleucine, tyrosine and tryptophan N sources; required for virulence in a mouse systemic infection model	-1.04892	-0.53111	0.51075
orf19.1275_RC	ORF19.1275	GAT1	GATA-type transcription factor; regulator of nitrogen utilization; required for nitrogen catabolite repression and utilization of isoleucine, tyrosine and tryptophan N sources; required for virulence in a mouse systemic infection model	1.04463	1.59296	0.00654
orf19.1283	ORF19.1283	MEC1	Cell cycle checkpoint protein with a role in genome integrity; RNA abundance regulated by tyrosol and cell density	1.48745	0.71501	0.04846
orf19.1283_RC	ORF19.1283	MEC1	Cell cycle checkpoint protein with a role in genome integrity; RNA abundance regulated by tyrosol and cell density	1.46543	0.68495	0.06373
orf19.130	ORF19.130	ORF19.130	Ortholog(s) have protein serine/threonine kinase activity, ubiquitin binding activity	-1.34948	-0.66014	0.08031
orf19.130_RC	ORF19.130	ORF19.130	Ortholog(s) have protein serine/threonine kinase activity, ubiquitin binding activity	-1.0328	-0.15003	0.87864
orf19.1314	ORF19.1314	ORF19.1314	Protein of unknown function; planktonic growth-induced gene	-1.20058	-0.5516	0.07969
orf19.1314_RC	ORF19.1314	ORF19.1314	Protein of unknown function; planktonic growth-induced gene	-1.43075	-1.16064	0.02222
orf19.1341	ORF19.1341	PRR2	Putative serine/threonine protein kinase; mutation confers resistance to 5-fluorocytosine (5-FC)	-3.58881	-2.60331	0.002
orf19.1341_RC	ORF19.1341	PRR2	Putative serine/threonine protein kinase; mutation confers resistance to 5-fluorocytosine (5-FC)	-2.42249	-1.76514	0.00373
orf19.1401	ORF19.1401	EAP1	GPI-anchored cell wall adhesin; Efg1-regulated; mutant suppresses cell adhesion, filamentation, invasive growth defects of S. cerevisiae flo8 or flo11 mutant; biofilm induced; required for biofilm formation; Bcr1-repressed in a/a biofilms	1.80173	1.03556	0.00527
orf19.1401_RC	ORF19.1401	EAP1	GPI-anchored cell wall adhesin; Efg1-regulated; mutant suppresses cell adhesion, filamentation, invasive growth defects of S. cerevisiae flo8 or flo11 mutant; biofilm induced; required for biofilm formation; Bcr1-repressed in a/a biofilms	2.0589	1.29305	0.00273
orf19.1434	ORF19.1434	ORF19.1434	Ortholog(s) have protein kinase activator activity	1.08107	0.23625	0.7303
orf19.1434_RC	ORF19.1434	ORF19.1434	Ortholog(s) have protein kinase activator activity	-1.06939	-0.39129	0.10677
orf19.1468	ORF19.1468	CDC55	Ortholog(s) have protein phosphatase type 2A regulator activity	-1.07634	-0.26843	0.03341
orf19.1468_RC	ORF19.1468	CDC55	Ortholog(s) have protein phosphatase type 2A regulator activity	-1.06804	-0.25676	0.08165
orf19.1476	ORF19.1476	ORF19.1476	Ortholog(s) have mRNA (N6-adenosine)-methyltransferase activity and role in mRNA methylation, meiosis	1.11786	0.37227	0.0073
orf19.1476_RC	ORF19.1476	ORF19.1476	Ortholog(s) have mRNA (N6-adenosine)-methyltransferase activity and role in mRNA methylation, meiosis	1.04778	0.11993	0.24157
orf19.1490	ORF19.1490	MSB2	Mucin family adhesin-like protein; cell wall damage sensor; required for Cek1 phosphorylation by cell wall stress; Rim101-repressed; activation releases extracellular domain into medium; Spider biofilm induced	3.46046	2.243	0.00417
orf19.1490_RC	ORF19.1490	MSB2	Mucin family adhesin-like protein; cell wall damage sensor; required for Cek1 phosphorylation by cell wall stress; Rim101-repressed; activation releases extracellular domain into medium; Spider biofilm induced	3.83223	2.44089	0.00668
orf19.1496	ORF19.1496	ORF19.1496	Putative transcription factor with zinc finger DNA-binding motif; Hap43p-repressed gene	-2.18766	-1.87304	0.00096
orf19.1496_RC	ORF19.1496	ORF19.1496	Putative transcription factor with zinc finger DNA-binding motif; Hap43p-repressed gene	-2.00133	-1.42654	0.00408
orf19.1499	ORF19.1499	CTF1	Putative zinc-finger transcription factor, similar to A. nidulans FarA and FarB; activates genes required for fatty acid degradation; induced by oleate; null mutant displays carbon source utilization defects and slightly reduced virulence	2.26784	1.56478	0.00519
orf19.1499_RC	ORF19.1499	CTF1	Putative zinc-finger transcription factor, similar to A. nidulans FarA and FarB; activates genes required for fatty acid degradation; induced by oleate; null mutant displays carbon source utilization defects and slightly reduced virulence	2.21828	1.4503	0.00633
orf19.1542	ORF19.1542	HEX3	Protein similar to S. cerevisiae Hex3p, which is involved in DNA damage response; transposon mutation affects filamentous growth	-1.06877	-0.3048	0.13292
orf19.1542_RC	ORF19.1542	HEX3	Protein similar to S. cerevisiae Hex3p, which is involved in DNA damage response; transposon mutation affects filamentous growth	-1.0118	-0.10166	0.81962
orf19.1565	ORF19.1565	ORF19.1565	Putative transcription factor with zinc finger DNA-binding motif	1.23472	0.33981	0.13634
orf19.1565_RC	ORF19.1565	ORF19.1565	Putative transcription factor with zinc finger DNA-binding motif	1.42827	0.67047	0.01691
orf19.1574	ORF19.1574	ORF19.1574	Putative TFIID subunit involved in RNA polymerase II transcription initiation; possibly an essential gene, disruptants not obtained by UAU1 method	-1.05664	-0.70175	0.07748
orf19.1574_RC	ORF19.1574	ORF19.1574	Putative TFIID subunit involved in RNA polymerase II transcription initiation; possibly an essential gene, disruptants not obtained by UAU1 method	-1.07101	-0.42318	0.21465
orf19.1576	ORF19.1576	ORF19.1576	Ortholog(s) have nuclear localization sequence binding, ubiquitin binding activity, role in response to ethanol and cytosol localization	-1.2319	-0.48446	0.15235
orf19.1576_RC	ORF19.1576	ORF19.1576	Ortholog(s) have nuclear localization sequence binding, ubiquitin binding activity, role in response to ethanol and cytosol localization	-1.46046	-0.81546	0.05847
orf19.1577	ORF19.1577	ORF19.1577	Has domain(s) with predicted sequence-specific DNA binding, sequence-specific DNA binding transcription factor activity, zinc ion binding activity and role in regulation of transcription, DNA-dependent	-1.51677	-1.11213	0.02599
orf19.1577_RC	ORF19.1577	ORF19.1577	Has domain(s) with predicted sequence-specific DNA binding, sequence-specific DNA binding transcription factor activity, zinc ion binding activity and role in regulation of transcription, DNA-dependent	-1.29188	-0.64844	0.1444
orf19.1589	ORF19.1589	ORF19.1589	Putative transcription factor component of the core factor (CF) rDNA transcription factor complex; Spider biofilm induced	1.09874	0.10473	0.07992
orf19.1589_RC	ORF19.1589	ORF19.1589	Putative transcription factor component of the core factor (CF) rDNA transcription factor complex; Spider biofilm induced	-1.37933	-0.70613	0.00163
orf19.1596	ORF19.1596	FGR28	Protein lacking an ortholog in S. cerevisiae; transposon mutation affects filamentous growth; possibly an essential gene, disruptants not obtained by UAU1 method	1.16119	0.43056	0.04046
orf19.1596_RC	ORF19.1596	FGR28	Protein lacking an ortholog in S. cerevisiae; transposon mutation affects filamentous growth; possibly an essential gene, disruptants not obtained by UAU1 method	1.1458	0.58023	0.00281
orf19.1605	ORF19.1605	PMS1	Putative DNA mismatch repair factor; ortholog of S. cerevisiae PMS1 which is an ATP-binding protein involved in DNA mismatch repair	1.17766	0.53916	0.24279
orf19.1605_RC	ORF19.1605	PMS1	Putative DNA mismatch repair factor; ortholog of S. cerevisiae PMS1 which is an ATP-binding protein involved in DNA mismatch repair	1.09558	0.32402	0.22579
orf19.1619	ORF19.1619	ORF19.1619	Putative kinase subunit of RNA polymerase II carboxy-terminal domain kinase I; possibly an essential gene, disruptants not obtained by UAU1 method	-1.74364	-1.4609	0.00138
orf19.1619_RC	ORF19.1619	ORF19.1619	Putative kinase subunit of RNA polymerase II carboxy-terminal domain kinase I; possibly an essential gene, disruptants not obtained by UAU1 method	-1.27061	-0.62253	0.00398
orf19.1622	ORF19.1622	YCG1	Putative condensin G	-1.00241	0.52254	0.63839
orf19.1622_RC	ORF19.1622	YCG1	Putative condensin G	-1.01995	-0.0834	0.65943
orf19.1636	ORF19.1636	STE50	Protein with sterile alpha motif (SAM) and Ras-associated domain (RAD); similar to S. cerevisiae Rad50p, which is involved in signal transduction via interaction with and regulation of MAPKKK	-1.24681	-0.52945	0.00192
orf19.1636_RC	ORF19.1636	STE50	Protein with sterile alpha motif (SAM) and Ras-associated domain (RAD); similar to S. cerevisiae Rad50p, which is involved in signal transduction via interaction with and regulation of MAPKKK	-1.37862	-0.73192	0.00289
orf19.1648	ORF19.1648	RAD50	Putative DNA double-strand break repair factor; involved in response to oxidative stress and drug resistance; flow model biofilm repressed	1.60602	0.86954	0.00605
orf19.1648_RC	ORF19.1648	RAD50	Putative DNA double-strand break repair factor; involved in response to oxidative stress and drug resistance; flow model biofilm repressed	1.56421	0.7868	0.01784
orf19.166	ORF19.166	ASG1	Gal4p family zinc-finger transcription factor with similarity to S. cerevisiae Asg1p	1.88808	1.12482	0.01649
orf19.166_RC	ORF19.166	ASG1	Gal4p family zinc-finger transcription factor with similarity to S. cerevisiae Asg1p	1.7461	0.98998	0.03327
orf19.1671	ORF19.1671	UTR2	Putative GPI anchored cell wall glycosidase; role in adhesion, hyphal growth on Spider (not serum) medium; chitin-binding, glycosyl hydrolase domains; induced during cell wall regeneration; mRNA in yeast-form cells; Spider biofilm induced	1.80996	1.05037	0.0013
orf19.1671_RC	ORF19.1671	UTR2	Putative GPI anchored cell wall glycosidase; role in adhesion, hyphal growth on Spider (not serum) medium; chitin-binding, glycosyl hydrolase domains; induced during cell wall regeneration; mRNA in yeast-form cells; Spider biofilm induced	2.1349	1.44307	0.00318
orf19.1673	ORF19.1673	PPT1	Putative serine/threonine phosphatase; induced in high iron	-1.08489	-0.24916	0.29185
orf19.1673_RC	ORF19.1673	PPT1	Putative serine/threonine phosphatase; induced in high iron	-1.31661	-0.63919	0.15057
orf19.1674	ORF19.1674	CDC53	Cullin, a scaffold subunit of the SCF ubiquitin-ligase complexes; depletion leads to increased filamentous growth and premature cell death	-1.36552	-0.71268	0.00166
orf19.1674_RC	ORF19.1674	CDC53	Cullin, a scaffold subunit of the SCF ubiquitin-ligase complexes; depletion leads to increased filamentous growth and premature cell death	-1.35687	-0.67863	0.01261
orf19.1683	ORF19.1683	PPH21	Putative protein phosphatase of the Type 2A-related family (serine/threonine-specific), similar to S. cerevisiae Pph21p; caspofungin repressed; possibly an essential gene, disruptants not obtained by UAU1 method	1.06437	0.0407	0.58963
orf19.1683_RC	ORF19.1683	PPH21	Putative protein phosphatase of the Type 2A-related family (serine/threonine-specific), similar to S. cerevisiae Pph21p; caspofungin repressed; possibly an essential gene, disruptants not obtained by UAU1 method	-1.29234	-0.60171	0.00923
orf19.1690	ORF19.1690	TOS1	Protein similar to alpha agglutinin anchor subunit; secreted; exogenously expressed protein is a substrate for Kex2 processing in vitro; fluconazole-induced; induced by alpha pheromone in SpiderM medium; Hap43-induced	2.06208	1.78362	0.00775
orf19.1690_RC	ORF19.1690	TOS1	Protein similar to alpha agglutinin anchor subunit; secreted; exogenously expressed protein is a substrate for Kex2 processing in vitro; fluconazole-induced; induced by alpha pheromone in SpiderM medium; Hap43-induced	2.26394	1.58705	0.01815
orf19.1699	ORF19.1699	BZZ1	Protein similar to S. cerevisiae Bzz1p, which is an SH3 domain protein involved in the regulation of actin polymerization	-1.03395	-0.15226	0.96837
orf19.1699_RC	ORF19.1699	BZZ1	Protein similar to S. cerevisiae Bzz1p, which is an SH3 domain protein involved in the regulation of actin polymerization	1.11198	0.12885	0.42397
orf19.1714	ORF19.1714	PGA44	Putative GPI-anchored protein	-1.00549	-0.05447	0.69725
orf19.1714_RC	ORF19.1714	PGA44	Putative GPI-anchored protein	-1.00408	-0.08835	0.73533
orf19.1718	ORF19.1718	ZCF8	Predicted Zn(II)2Cys6 transcription factor; repressed by fluphenazine treatment; required for yeast cell adherence to silicone substrate	1.22683	0.32568	0.32265
orf19.1718_RC	ORF19.1718	ZCF8	Predicted Zn(II)2Cys6 transcription factor; repressed by fluphenazine treatment; required for yeast cell adherence to silicone substrate	1.617	0.88326	0.0418
orf19.1729	ORF19.1729	ORF19.1729	Putative transcription factor with zinc finger DNA-binding motif	1.09783	0.10306	0.18323
orf19.1729_RC	ORF19.1729	ORF19.1729	Putative transcription factor with zinc finger DNA-binding motif	1.02412	-0.03697	0.36578
orf19.173	ORF19.173	ORF19.173	C2H2 transcription factor; induced by Mnl1 under weak acid stress	1.77415	1.07014	0.01878
orf19.173_RC	ORF19.173	ORF19.173	C2H2 transcription factor; induced by Mnl1 under weak acid stress	1.57334	0.7828	0.04559
orf19.175	ORF19.175	ORF19.175	Ortholog of C. dubliniensis CD36 : Cd36_27430, C. parapsilosis CDC317 : CPAR2_802450, Candida tenuis NRRL Y-1498 : CANTEDRAFT_113969 and Debaryomyces hansenii CBS767 : DEHA2A13002g	-1.54061	-1.15141	0.0004
orf19.175_RC	ORF19.175	ORF19.175	Ortholog of C. dubliniensis CD36 : Cd36_27430, C. parapsilosis CDC317 : CPAR2_802450, Candida tenuis NRRL Y-1498 : CANTEDRAFT_113969 and Debaryomyces hansenii CBS767 : DEHA2A13002g	-1.33009	-0.92341	0.00204
orf19.1754	ORF19.1754	ORF19.1754	Putative calmodulin-dependent protein kinase; possibly an essential gene, disruptants not obtained by UAU1 method	-1.74253	-1.54407	0.00081
orf19.1754_RC	ORF19.1754	ORF19.1754	Putative calmodulin-dependent protein kinase; possibly an essential gene, disruptants not obtained by UAU1 method	-1.18431	-0.39643	0.00199
orf19.1757	ORF19.1757	ORF19.1757	Putative C2H2 transcription factor; expression upregulated in clinical isolates from HIV+ patients with oral candidiasis; Spider biofilm induced	-1.09711	-0.27173	0.02375
orf19.1757_RC	ORF19.1757	ORF19.1757	Putative C2H2 transcription factor; expression upregulated in clinical isolates from HIV+ patients with oral candidiasis; Spider biofilm induced	-1.30773	-0.57068	0.01752
orf19.1759	ORF19.1759	PHO23	Ortholog(s) have methylated histone residue binding activity	-1.59641	-1.06131	0.01755
orf19.1759_RC	ORF19.1759	PHO23	Ortholog(s) have methylated histone residue binding activity	-1.29265	-0.72557	0.05716
orf19.1760	ORF19.1760	RAS1	RAS signal transduction GTPase; regulates cAMP and MAP kinase pathways; role in hyphal induction, virulence, apoptosis, heat-shock sensitivity; nonessential; plasma membrane-localized; complements viability of S. cerevisiae ras1 ras2 mutant	-1.10103	-0.27891	0.00597
orf19.1760_RC	ORF19.1760	RAS1	RAS signal transduction GTPase; regulates cAMP and MAP kinase pathways; role in hyphal induction, virulence, apoptosis, heat-shock sensitivity; nonessential; plasma membrane-localized; complements viability of S. cerevisiae ras1 ras2 mutant	-1.00821	-0.10146	0.23243
orf19.1762	ORF19.1762	OCA1	Putative protein phosphatase of the PTP family (tyrosine-specific); ortholog of S. cerevisiae Oca1; mutant is viable; mutant shows virulence defect	-1.11433	-0.41341	0.03486
orf19.1762_RC	ORF19.1762	OCA1	Putative protein phosphatase of the PTP family (tyrosine-specific); ortholog of S. cerevisiae Oca1; mutant is viable; mutant shows virulence defect	1.09294	0.14214	0.06566
orf19.1769	ORF19.1769	ORF19.1769	Ortholog(s) have G-protein beta/gamma-subunit complex binding, actin binding activity, role in positive regulation of transcription from RNA polymerase II promoter by pheromones, protein folding and cytoplasm localization	1.49782	0.729	0.01
orf19.1769_RC	ORF19.1769	ORF19.1769	Ortholog(s) have G-protein beta/gamma-subunit complex binding, actin binding activity, role in positive regulation of transcription from RNA polymerase II promoter by pheromones, protein folding and cytoplasm localization	1.47322	0.71537	0.01734
orf19.1777	ORF19.1777	ORF19.1777	Ortholog(s) have ubiquitin-specific protease activity, role in endocytosis, protein deubiquitination and cell division site, cytosol, nucleus, peroxisome, transport vesicle localization	1.2414	0.35069	0.09182
orf19.1777_RC	ORF19.1777	ORF19.1777	Ortholog(s) have ubiquitin-specific protease activity, role in endocytosis, protein deubiquitination and cell division site, cytosol, nucleus, peroxisome, transport vesicle localization	1.68366	0.96466	0.00939
orf19.1815	ORF19.1815	ORF19.1815	Ortholog of S. cerevisae/S. pombe Tif6; constituent of 66S pre-ribosomal particles; Spider biofilm induced	1.20968	0.29854	0.00271
orf19.1815_RC	ORF19.1815	ORF19.1815	Ortholog of S. cerevisae/S. pombe Tif6; constituent of 66S pre-ribosomal particles; Spider biofilm induced	1.11415	0.13448	0.08494
orf19.1822	ORF19.1822	UME6	Zn(II)2Cys6 transcription factor; role in hyphal extension, virulence, adherence to plastic; filament induced; regulated by Nrg1/Tup1/Rfg1, alkaline conditions; expression promotes highly filamentous biofilms; rat catheter biofilm induced	1.03796	0.12121	0.28778
orf19.1822_RC	ORF19.1822	UME6	Zn(II)2Cys6 transcription factor; role in hyphal extension, virulence, adherence to plastic; filament induced; regulated by Nrg1/Tup1/Rfg1, alkaline conditions; expression promotes highly filamentous biofilms; rat catheter biofilm induced	1.02003	0.04048	0.1915
orf19.1824	ORF19.1824	PGA50	Putative GPI-anchored protein; adhesin-like protein	1.56036	0.74998	0.00291
orf19.1824_RC	ORF19.1824	PGA50	Putative GPI-anchored protein; adhesin-like protein	1.57318	0.76969	0.00817
orf19.1826	ORF19.1826	MDM34	Putative zinc finger transcription factor; macrophage-downregulated; flow model biofilm induced; flow model and Spider biofilm induced	-1.33451	-0.66639	0.0051
orf19.1826_RC	ORF19.1826	MDM34	Putative zinc finger transcription factor; macrophage-downregulated; flow model biofilm induced; flow model and Spider biofilm induced	-1.62839	-1.02745	0.00339
orf19.1842	ORF19.1842	BUD5	Predicted GTP/GDP exchange factor for Rsr1; rat catheter biofilm induced	-1.20921	-0.46775	0.32736
orf19.1842_RC	ORF19.1842	BUD5	Predicted GTP/GDP exchange factor for Rsr1; rat catheter biofilm induced	1.03876	-0.00838	0.54208
orf19.1850	ORF19.1850	SIW14	Putative protein phosphatase of the PTP family (tyrosine-specific), similar to S. cerevisiae Siw14p; mutant shows virulence defect; Hap43p-repressed gene	-1.03442	-0.26153	0.86797
orf19.1850_RC	ORF19.1850	SIW14	Putative protein phosphatase of the PTP family (tyrosine-specific), similar to S. cerevisiae Siw14p; mutant shows virulence defect; Hap43p-repressed gene	-1.01979	0.12329	0.98638
orf19.1901	ORF19.1901	MCM3	Putative DNA replication protein; periodic mRNA expression, peak at cell-cycle M/G1 phase; Spider biofilm induced	-1.81536	-2.14942	0.00016
orf19.1901_RC	ORF19.1901	MCM3	Putative DNA replication protein; periodic mRNA expression, peak at cell-cycle M/G1 phase; Spider biofilm induced	-1.3841	-1.24697	0.00014
orf19.1911	ORF19.1911	PGA52	GPI-anchored cell surface protein of unknown function; Hap43p-repressed gene; fluconazole-induced; possibly an essential gene, disruptants not obtained by UAU1 method	-1.17433	-0.36163	0.78777
orf19.1911_RC	ORF19.1911	PGA52	GPI-anchored cell surface protein of unknown function; Hap43p-repressed gene; fluconazole-induced; possibly an essential gene, disruptants not obtained by UAU1 method	-1.04198	-0.16785	0.97517
orf19.1936	ORF19.1936	SNF1	Essential protein; functional homolog of S. cerevisiae Snf1p regulator of sugar metabolism; constitutively expressed; Thr208 phosphorylation may have regulatory role; up-regulation associated with azole resistance; has polyhistidine tract	-1.07025	-0.24802	0.12786
orf19.1936_RC	ORF19.1936	SNF1	Essential protein; functional homolog of S. cerevisiae Snf1p regulator of sugar metabolism; constitutively expressed; Thr208 phosphorylation may have regulatory role; up-regulation associated with azole resistance; has polyhistidine tract	-1.01324	-0.15395	0.66243
orf19.1943	ORF19.1943	ORF19.1943	Ortholog of C. parapsilosis CDC317 : CPAR2_302610, C. dubliniensis CD36 : Cd36_51070, Candida orthopsilosis Co 90-125 : CORT_0E04770 and Spathaspora passalidarum NRRL Y-27907 : SPAPADRAFT_50634	1.0179	0.04153	0.12721
orf19.1943_RC	ORF19.1943	ORF19.1943	Ortholog of C. parapsilosis CDC317 : CPAR2_302610, C. dubliniensis CD36 : Cd36_51070, Candida orthopsilosis Co 90-125 : CORT_0E04770 and Spathaspora passalidarum NRRL Y-27907 : SPAPADRAFT_50634	1.07142	0.27634	0.05383
orf19.1944	ORF19.1944	GPR1	Plasma membrane G-protein-coupled receptor of the cAMP-PKA pathway; required for WT hyphal growth; reports differ on role in cAMP-mediated glucose signaling; Gpr1 C terminus binds Gpa2; regulates HWP1 and ECE1; flow model biofilm induced	-1.0329	-0.17956	0.05533
orf19.1944_RC	ORF19.1944	GPR1	Plasma membrane G-protein-coupled receptor of the cAMP-PKA pathway; required for WT hyphal growth; reports differ on role in cAMP-mediated glucose signaling; Gpr1 C terminus binds Gpa2; regulates HWP1 and ECE1; flow model biofilm induced	-1.03903	-0.19322	0.21998
orf19.1949	ORF19.1949	VPS1	Dynamin-family GTPase-related protein; induced upon adherence to polystyrene; regulated by Gcn2p and Gcn4p	-1.03808	-0.29301	0.70654
orf19.1949_RC	ORF19.1949	VPS1	Dynamin-family GTPase-related protein; induced upon adherence to polystyrene; regulated by Gcn2p and Gcn4p	-1.04951	-0.49326	0.46823
orf19.1956	ORF19.1956	ORF19.1956	Ortholog(s) have role in reciprocal meiotic recombination and mitochondrion localization	1.0742	0.3726	0.24048
orf19.1956_RC	ORF19.1956	ORF19.1956	Ortholog(s) have role in reciprocal meiotic recombination and mitochondrion localization	1.09017	2.41633	0.04354
orf19.1960	ORF19.1960	CLN3	G1 cyclin; depletion abolishes budding and causes hyphal growth defects; farnesol regulated, functional in S. cerevisiae; possibly essential (UAU1 method); other biofilm induced; Spider biofilm induced	-1.54246	-0.93948	0.00135
orf19.1960_RC	ORF19.1960	CLN3	G1 cyclin; depletion abolishes budding and causes hyphal growth defects; farnesol regulated, functional in S. cerevisiae; possibly essential (UAU1 method); other biofilm induced; Spider biofilm induced	-1.05034	-0.2382	0.18597
orf19.1971	ORF19.1971	TRY3	RING-finger transcription factor; regulator of yeast form adherence; required for yeast cell adherence to silicone substrate; Spider biofilm induced	-1.35337	-0.96594	0.00138
orf19.1971_RC	ORF19.1971	TRY3	RING-finger transcription factor; regulator of yeast form adherence; required for yeast cell adherence to silicone substrate; Spider biofilm induced	-1.11836	-0.41976	0.01173
orf19.1985	ORF19.1985	ORF19.1985	Has aminoglycoside phosphotransferase and protein kinase domains; rat catheter and flow model biofilm induced	-1.01094	-0.10693	0.3548
orf19.1985_RC	ORF19.1985	ORF19.1985	Has aminoglycoside phosphotransferase and protein kinase domains; rat catheter and flow model biofilm induced	-1.21729	-0.43504	0.03228
orf19.1989	ORF19.1989	DCW1	Protein with predicted GPI modification; dfg5 dcw1 double mutant is inviable; not required for wild-type hyphal growth; upregulated in cyr1 mutant (yeast or hyphal form); Hap43-induced	-1.49082	-0.8797	0.02081
orf19.1989_RC	ORF19.1989	DCW1	Protein with predicted GPI modification; dfg5 dcw1 double mutant is inviable; not required for wild-type hyphal growth; upregulated in cyr1 mutant (yeast or hyphal form); Hap43-induced	-1.24171	-0.50427	0.11499
orf19.20	ORF19.20	RTS1	Putative serine/threonine-protein phosphatase B-type regulatory subunit; transcription is regulated upon yeast-hyphal switch	-1.07113	-0.22344	0.2559
orf19.20_RC	ORF19.20	RTS1	Putative serine/threonine-protein phosphatase B-type regulatory subunit; transcription is regulated upon yeast-hyphal switch	-1.60268	-0.99963	0.01058
orf19.2014	ORF19.2014	BCY1	Protein kinase A regulatory subunit; required for nuclear localization of Tpk1; physically interacts with Tpk1; essential; apoptosis-regulated; bcy1 heterozygous or bcy1 tpk2 mutant has filamentous growth defect	1.5747	0.78157	0.33757
orf19.2014_RC	ORF19.2014	BCY1	Protein kinase A regulatory subunit; required for nuclear localization of Tpk1; physically interacts with Tpk1; essential; apoptosis-regulated; bcy1 heterozygous or bcy1 tpk2 mutant has filamentous growth defect	1.63199	0.90186	0.29579
orf19.2033	ORF19.2033	PGA19	Putative GPI-anchored protein; macrophage-induced gene; mutants are viable	4.74983	3.20024	0.00059
orf19.2033_RC	ORF19.2033	PGA19	Putative GPI-anchored protein; macrophage-induced gene; mutants are viable	4.47545	2.92593	0.00138
orf19.2044	ORF19.2044	PGA27	Putative GPI-anchored protein	2.29732	1.55009	0.00127
orf19.2044_RC	ORF19.2044	PGA27	Putative GPI-anchored protein	2.40247	1.723	0.00083
orf19.2054	ORF19.2054	FGR15	Putative transcription factor with zinc finger DNA-binding motif; lacks an ortholog in S. cerevisiae; transposon mutation affects filamentous growth; caspofungin induced; mutation causes marginal increase in caspofungin sensitivity	-2.87259	-2.06816	0.00285
orf19.2054_RC	ORF19.2054	FGR15	Putative transcription factor with zinc finger DNA-binding motif; lacks an ortholog in S. cerevisiae; transposon mutation affects filamentous growth; caspofungin induced; mutation causes marginal increase in caspofungin sensitivity	-1.66743	-1.085	0.0041
orf19.2060	ORF19.2060	SOD5	Cu and Zn-containing superoxide dismutase; protects against oxidative stress; induced by neutrophils, hyphal growth, caspofungin, osmotic/oxidative stress; oralpharyngeal candidiasis induced; rat catheter and Spider biofilm induced	1.80081	1.09758	0.00323
orf19.2060_RC	ORF19.2060	SOD5	Cu and Zn-containing superoxide dismutase; protects against oxidative stress; induced by neutrophils, hyphal growth, caspofungin, osmotic/oxidative stress; oralpharyngeal candidiasis induced; rat catheter and Spider biofilm induced	2.05733	1.31566	0.00107
orf19.2062	ORF19.2062	SOD4	Cu and Zn-containing superoxide dismutase; role in response to host innate immune ROS; regulated on white-opaque switch; ciclopirox olamine induced; caspofungin repressed; SOD1,4,5,6 gene family; yeast-associated; Spider biofilm induced	2.0287	1.25914	0.00484
orf19.2062_RC	ORF19.2062	SOD4	Cu and Zn-containing superoxide dismutase; role in response to host innate immune ROS; regulated on white-opaque switch; ciclopirox olamine induced; caspofungin repressed; SOD1,4,5,6 gene family; yeast-associated; Spider biofilm induced	2.15902	1.49788	0.00764
orf19.207	ORF19.207	PGA55	GPI-anchored adhesin-like protein; filament induced; regulated by Nrg1, Tup1; regulated upon hyphal formation; mRNA binds to She3 and is localized to yeast-form buds and hyphal tips; induced during chlamydospore formation	1.52554	0.76595	0.01484
orf19.207_RC	ORF19.207	PGA55	GPI-anchored adhesin-like protein; filament induced; regulated by Nrg1, Tup1; regulated upon hyphal formation; mRNA binds to She3 and is localized to yeast-form buds and hyphal tips; induced during chlamydospore formation	1.4408	0.61791	0.01678
orf19.2084	ORF19.2084	CDH1	Protein involved in regulation of mitosis; similar to S. cerevisiae Cdh1, which is an APC/C component; transcriptionally induced by Mnl1 under weak acid stress	1.01654	0.95979	0.8377
orf19.2084_RC	ORF19.2084	CDH1	Protein involved in regulation of mitosis; similar to S. cerevisiae Cdh1, which is an APC/C component; transcriptionally induced by Mnl1 under weak acid stress	-1.01608	-0.14254	0.35757
orf19.2093	ORF19.2093	RFA1	Putative DNA replication factor A; RNA abundance regulated by cell cycle, tyrosol and cell density	1.23814	0.65191	0.01714
orf19.2093_RC	ORF19.2093	RFA1	Putative DNA replication factor A; RNA abundance regulated by cell cycle, tyrosol and cell density	1.28481	0.76736	0.00519
orf19.2097	ORF19.2097	ORF19.2097	Predicted DNA-dependent ATPase/helicase; Spider biofilm induced	1.69895	1.59079	0.00734
orf19.2097_RC	ORF19.2097	ORF19.2097	Predicted DNA-dependent ATPase/helicase; Spider biofilm induced	2.21273	2.23492	0.0094
orf19.2102	ORF19.2102	CKB1	Regulatory subunit of protein kinase CK2 (casein kinase II), beta subunit; null mutants are hypersensitive to caspofungin and hydrogen peroxide medium	1.09698	0.10149	0.13103
orf19.2102_RC	ORF19.2102	CKB1	Regulatory subunit of protein kinase CK2 (casein kinase II), beta subunit; null mutants are hypersensitive to caspofungin and hydrogen peroxide medium	1.26065	0.51935	0.00224
orf19.2105	ORF19.2105	ORF19.2105	Putative pre-mRNA-splicing factor; possibly an essential gene, disruptants not obtained by UAU1 method	1.32746	0.48573	0.05138
orf19.2105_RC	ORF19.2105	ORF19.2105	Putative pre-mRNA-splicing factor; possibly an essential gene, disruptants not obtained by UAU1 method	-1.27806	-0.55596	0.00587
orf19.2108	ORF19.2108	SOD6	Copper- and zinc-containing superoxide dismutase; gene family includes SOD1, SOD4, SOD5, and SOD6; gene may contain an intron; Hap43-repressed; flow model and rat catheter biofilm induced	-1.45389	-0.79132	0.01724
orf19.2108_RC	ORF19.2108	SOD6	Copper- and zinc-containing superoxide dismutase; gene family includes SOD1, SOD4, SOD5, and SOD6; gene may contain an intron; Hap43-repressed; flow model and rat catheter biofilm induced	-1.46448	-0.81735	0.02851
orf19.217	ORF19.217	ORF19.217	Ortholog(s) have sequence-specific DNA binding activity	-2.35098	-1.73706	0.01574
orf19.217_RC	ORF19.217	ORF19.217	Ortholog(s) have sequence-specific DNA binding activity	-1.90596	-1.30495	0.01834
orf19.220	ORF19.220	PIR1	1,3-beta-glucan-linked cell wall protein; N-mannosylated, O-glycosylated by Pmt1; cell wall defect in het mutant; Hog1/fluconazole/hypoxia induced; iron/Efg1/Plc1/temp regulated; flow model biofilm induced; hyphal, Spider biofilm repressed	2.3321	1.69689	0.00182
orf19.220_RC	ORF19.220	PIR1	1,3-beta-glucan-linked cell wall protein; N-mannosylated, O-glycosylated by Pmt1; cell wall defect in het mutant; Hog1/fluconazole/hypoxia induced; iron/Efg1/Plc1/temp regulated; flow model biofilm induced; hyphal, Spider biofilm repressed	1.61009	0.9201	0.0022
orf19.2204.2	ORF19.2204.2	ORF19.2204.2	Ortholog(s) have GTPase activity and role in establishment or maintenance of actin cytoskeleton polarity, establishment or maintenance of cell polarity regulating cell shape, regulation of alpha-glucan biosynthetic process	-1.19362	-0.54762	0.122
orf19.2204.2_RC	ORF19.2204.2	ORF19.2204.2	Ortholog(s) have GTPase activity and role in establishment or maintenance of actin cytoskeleton polarity, establishment or maintenance of cell polarity regulating cell shape, regulation of alpha-glucan biosynthetic process	-1.04919	-0.21719	0.93169
orf19.2222	ORF19.2222	ORF19.2222	Putative casein kinase; plasma membrane-localized	1.64021	0.91197	0.01047
orf19.2222_RC	ORF19.2222	ORF19.2222	Putative casein kinase; plasma membrane-localized	1.31655	0.47241	0.01119
orf19.223	ORF19.223	ORF19.223	Putative serine/threonine protein kinase; Hap43-repressed; induced by prostaglandins; possibly an essential gene, disruptants not obtained by UAU1 method; flow model biofilm induced; Spider biofilm induced	1.20781	0.29542	0.04981
orf19.223_RC	ORF19.223	ORF19.223	Putative serine/threonine protein kinase; Hap43-repressed; induced by prostaglandins; possibly an essential gene, disruptants not obtained by UAU1 method; flow model biofilm induced; Spider biofilm induced	-1.03705	-0.14768	0.66206
orf19.2236	ORF19.2236	FHL1	Fork-head transcription factor; forms a heterodimer with Ifh1 that is tethered to promoters by Tbf1; positively regulates rRNA and ribosomal protein gene transcription	1.75558	1.04893	0.01517
orf19.2236_RC	ORF19.2236	FHL1	Fork-head transcription factor; forms a heterodimer with Ifh1 that is tethered to promoters by Tbf1; positively regulates rRNA and ribosomal protein gene transcription	1.62474	0.86823	0.02737
orf19.2237	ORF19.2237	SPR1	Putative GPI-anchored protein; similar but not orthologous to S. cerevisiae Spr1, a sporulation-specific exo-1,3-beta-glucanase; mutant is viable	-1.0373	-0.14931	0.81472
orf19.2237_RC	ORF19.2237	SPR1	Putative GPI-anchored protein; similar but not orthologous to S. cerevisiae Spr1, a sporulation-specific exo-1,3-beta-glucanase; mutant is viable	1.43022	0.63596	0.13558
orf19.2267	ORF19.2267	RFA2	Putative DNA replication factor A; RNA abundance regulated by cell cycle, tyrosol and cell density	1.20681	0.56003	0.01156
orf19.2267_RC	ORF19.2267	RFA2	Putative DNA replication factor A; RNA abundance regulated by cell cycle, tyrosol and cell density	1.07013	0.40871	0.16222
orf19.2268	ORF19.2268	RCK2	Predicted MAP kinase-activated protein kinase, similar to S. cerevisiae serine/threonine protein kinase Rck2p; induced by osmotic stress via Hog1p; macrophage/pseudohyphal-repressed; mutants are sensitive to rapamycin	-1.0262	-0.16778	0.32938
orf19.2268_RC	ORF19.2268	RCK2	Predicted MAP kinase-activated protein kinase, similar to S. cerevisiae serine/threonine protein kinase Rck2p; induced by osmotic stress via Hog1p; macrophage/pseudohyphal-repressed; mutants are sensitive to rapamycin	-1.12092	-0.40653	0.15953
orf19.2277	ORF19.2277	TPK2	cAMP-dependent protein kinase catalytic subunit; isoform of Tpk1; needed for epithelial cell damage, engulfment and oral (not systemic) virulence in mice; control of morphogenesis and stress response; rat catheter, Spider biofilm repressed	-1.31688	-0.63961	0.37031
orf19.2277_RC	ORF19.2277	TPK2	cAMP-dependent protein kinase catalytic subunit; isoform of Tpk1; needed for epithelial cell damage, engulfment and oral (not systemic) virulence in mice; control of morphogenesis and stress response; rat catheter, Spider biofilm repressed	-1.59156	-1.0213	0.10043
orf19.2280	ORF19.2280	ZCF10	Putative transcription factor with zinc cluster DNA-binding motif	-1.19658	-0.44658	0.27898
orf19.2280_RC	ORF19.2280	ZCF10	Putative transcription factor with zinc cluster DNA-binding motif	1.14868	0.19429	0.45554
orf19.229	ORF19.229	ORF19.229	Ortholog(s) have ubiquitin-protein ligase activity, role in protein ubiquitination involved in ubiquitin-dependent protein catabolic process and chromosome, centromeric region, mitotic spindle pole body, nucleus localization	-1.05007	-0.45378	0.07769
orf19.229_RC	ORF19.229	ORF19.229	Ortholog(s) have ubiquitin-protein ligase activity, role in protein ubiquitination involved in ubiquitin-dependent protein catabolic process and chromosome, centromeric region, mitotic spindle pole body, nucleus localization	-1.13311	-2.32501	0.02446
orf19.2320	ORF19.2320	ORF19.2320	Putative serine/threonine-protein kinase; possibly an essential gene, disruptants not obtained by UAU1 method	-1.0965	-0.34832	0.19757
orf19.2320_RC	ORF19.2320	ORF19.2320	Putative serine/threonine-protein kinase; possibly an essential gene, disruptants not obtained by UAU1 method	-1.21129	-0.65511	0.15864
orf19.2324	ORF19.2324	UBA4	Putative ubiquitin activating protein; Hap43-repressed; induced by prostaglandins; clade-associated gene expression	-3.46376	-2.43469	0.00426
orf19.2324_RC	ORF19.2324	UBA4	Putative ubiquitin activating protein; Hap43-repressed; induced by prostaglandins; clade-associated gene expression	-1.45049	-1.00286	0.0041
orf19.233.1	ORF19.233.1	HRT1	Ortholog of S. cerevisiae Hrt1; component of a nuclear ubiquitin-protein ligase complex involved in cell cycle control; induced by hydroxyurea; Spider biofilm induced	-3.35111	-2.4577	0.00889
orf19.233.1_RC	ORF19.233.1	HRT1	Ortholog of S. cerevisiae Hrt1; component of a nuclear ubiquitin-protein ligase complex involved in cell cycle control; induced by hydroxyurea; Spider biofilm induced	-1.59115	-1.19922	0.00535
orf19.2331	ORF19.2331	ADA2	Zinc finger and homeodomain transcriptional coactivator; role in cell wall integrity and in sensitivity to caspofungin; required for the normal transcriptional response to caspofungin; required for yeast cell adherence to silicone substrate	1.32667	0.48454	0.00864
orf19.2331_RC	ORF19.2331	ADA2	Zinc finger and homeodomain transcriptional coactivator; role in cell wall integrity and in sensitivity to caspofungin; required for the normal transcriptional response to caspofungin; required for yeast cell adherence to silicone substrate	1.19297	0.27623	0.044
orf19.2356	ORF19.2356	CRZ2	C2H2 transcription factor; crz1 not crz2 null mutation suppresses fluconazole resistance of homozygous cka2 null; Rim101-repressed at pH 8; required for yeast cell adherence to silicone substrate; Spider biofilm induced	-1.10384	-0.34942	0.07566
orf19.2356_RC	ORF19.2356	CRZ2	C2H2 transcription factor; crz1 not crz2 null mutation suppresses fluconazole resistance of homozygous cka2 null; Rim101-repressed at pH 8; required for yeast cell adherence to silicone substrate; Spider biofilm induced	-1.24144	-0.72398	0.10741
orf19.2379	ORF19.2379	NOT4	Putative E3 ubiquitin-protein ligase; required for maintenance, but not induction, of hyphal development; homozygous null mutant is avirulent in mouse systemic infection despite persistence in host; repressed in rat oral candidiasis	-1.35151	-0.69191	0.00258
orf19.2379_RC	ORF19.2379	NOT4	Putative E3 ubiquitin-protein ligase; required for maintenance, but not induction, of hyphal development; homozygous null mutant is avirulent in mouse systemic infection despite persistence in host; repressed in rat oral candidiasis	-1.47915	-0.82258	1.86314e-05
orf19.239	ORF19.239	ORF19.239	Putative ATP-dependent helicase; induced by nitric oxide	-1.09324	-0.42828	0.01171
orf19.239_RC	ORF19.239	ORF19.239	Putative ATP-dependent helicase; induced by nitric oxide	-1.07277	-0.40304	0.02753
orf19.2393	ORF19.2393	ORF19.2393	Putative transcription factor with zinc finger DNA-binding motif	-1.03128	-0.25611	0.25246
orf19.2393_RC	ORF19.2393	ORF19.2393	Putative transcription factor with zinc finger DNA-binding motif	1.00079	0.53706	0.90831
orf19.2395	ORF19.2395	IME2	Putative serine/threonine protein kinase; mutation confers hypersensitivity to amphotericin B	1.11291	0.13053	0.06251
orf19.2395_RC	ORF19.2395	IME2	Putative serine/threonine protein kinase; mutation confers hypersensitivity to amphotericin B	1.06456	0.04106	0.3152
orf19.2399	ORF19.2399	ORF19.2399	Putative transcription factor with zinc finger DNA-binding motif; similar to bacterial DnaJ; induced in low iron	1.2321	0.33553	0.00882
orf19.2399_RC	ORF19.2399	ORF19.2399	Putative transcription factor with zinc finger DNA-binding motif; similar to bacterial DnaJ; induced in low iron	1.15271	0.20134	0.07998
orf19.2417	ORF19.2417	SMC5	Protein similar to S. cerevisiae Smc5p, which is involved in DNA repair; transposon mutation affects filamentous growth	1.00634	0.17787	0.38906
orf19.2417_RC	ORF19.2417	SMC5	Protein similar to S. cerevisiae Smc5p, which is involved in DNA repair; transposon mutation affects filamentous growth	-1.0645	-0.29406	0.61847
orf19.2423	ORF19.2423	ZCF11	Zn(II)2Cys6 transcription factor; required for wild-type filamentous growth; mRNA binds She3	-1.02825	-0.0864	0.48868
orf19.2423_RC	ORF19.2423	ZCF11	Zn(II)2Cys6 transcription factor; required for wild-type filamentous growth; mRNA binds She3	-1.03179	-0.14856	0.65941
orf19.2429	ORF19.2429	ORF19.2429	Protein of unknown function; induced by alpha pheromone in SpiderM medium	-1.06145	-0.37739	0.08766
orf19.2429_RC	ORF19.2429	ORF19.2429	Protein of unknown function; induced by alpha pheromone in SpiderM medium	-1.0368	-0.19436	0.08877
orf19.2432	ORF19.2432	HAC1	bZIP transcription factor; role in unfolded protein response and control of morphology; transcript undergoes atypical splicing at C terminus under ER stress; induced during mating and by caspofungin; mRNA binds She3; Spider biofilm induced	-1.14392	-0.35034	0.31588
orf19.2432_RC	ORF19.2432	HAC1	bZIP transcription factor; role in unfolded protein response and control of morphology; transcript undergoes atypical splicing at C terminus under ER stress; induced during mating and by caspofungin; mRNA binds She3; Spider biofilm induced	-1.00147	-0.09036	0.55016
orf19.2447	ORF19.2447	ORF19.2447	Putative Type II phosphatidylinositol 4-kinase; Ssr1-repressed; flow model biofilm repressed	-1.06708	-0.93351	0.03775
orf19.2447_RC	ORF19.2447	ORF19.2447	Putative Type II phosphatidylinositol 4-kinase; Ssr1-repressed; flow model biofilm repressed	1.00825	0.0063	0.49333
orf19.2451	ORF19.2451	PGA45	Putative GPI-anchored cell wall protein; repressed in core caspofungin response; Hog1-induced; regulated by Ssn6; Mob2-dependent hyphal regulation; flow model biofilm induced	1.30043	0.43942	0.0067
orf19.2451_RC	ORF19.2451	PGA45	Putative GPI-anchored cell wall protein; repressed in core caspofungin response; Hog1-induced; regulated by Ssn6; Mob2-dependent hyphal regulation; flow model biofilm induced	1.69016	0.94772	0.00084
orf19.2458	ORF19.2458	SIP5	Protein of unknown function; flow model, rat catheter and Spider biofilm induced	2.28704	1.58177	0.00966
orf19.2458_RC	ORF19.2458	SIP5	Protein of unknown function; flow model, rat catheter and Spider biofilm induced	1.83761	1.14094	0.00508
orf19.2475	ORF19.2475	PGA26	GPI-anchored adhesin-like protein of the cell wall; role in cell wall integrity; required for normal virulence; induced in high iron and during cell wall regeneration; Hap43-repressed	-1.27266	-0.52836	0.0868
orf19.2475_RC	ORF19.2475	PGA26	GPI-anchored adhesin-like protein of the cell wall; role in cell wall integrity; required for normal virulence; induced in high iron and during cell wall regeneration; Hap43-repressed	-1.35752	-0.65555	0.03525
orf19.2504	ORF19.2504	BMS1	Putative GTPase; Hap43-induced gene; mutation confers resistance to 5-fluorocytosine (5-FC); flucytosine induced; repressed by prostaglandins; Spider biofilm induced	1.67798	0.98973	0.01588
orf19.2504_RC	ORF19.2504	BMS1	Putative GTPase; Hap43-induced gene; mutation confers resistance to 5-fluorocytosine (5-FC); flucytosine induced; repressed by prostaglandins; Spider biofilm induced	2.34133	1.6746	0.0031
orf19.2519	ORF19.2519	ORF19.2519	Ortholog(s) have role in chromosome segregation and nuclear MIS12/MIND complex localization	1.51007	1.34083	0.00046
orf19.2519_RC	ORF19.2519	ORF19.2519	Ortholog(s) have role in chromosome segregation and nuclear MIS12/MIND complex localization	1.35447	0.97062	0.00445
orf19.2528	ORF19.2528	ORF19.2528	Putative RNA polymerase III transcription factor (TFIIIB) subunit; flucytosine repressed	1.31756	0.63885	0.03004
orf19.2528_RC	ORF19.2528	ORF19.2528	Putative RNA polymerase III transcription factor (TFIIIB) subunit; flucytosine repressed	1.52557	1.02633	0.00884
orf19.2534	ORF19.2534	PIN4	Protein with similarity to S. cerevisiae Pin4p; transposon mutation affects filamentous growth	2.1167	1.98947	0.02118
orf19.2534_RC	ORF19.2534	PIN4	Protein with similarity to S. cerevisiae Pin4p; transposon mutation affects filamentous growth	1.40435	0.98547	0.03935
orf19.2538	ORF19.2538	PTC2	Protein phosphatase of the Type 2C-related family (serine/threonine-specific) with a potential role in DNA damage checkpoint control; localizes to both cytoplasm and mitochondria; mutant shows virulence defect	-1.20283	-0.45709	0.00708
orf19.2538_RC	ORF19.2538	PTC2	Protein phosphatase of the Type 2C-related family (serine/threonine-specific) with a potential role in DNA damage checkpoint control; localizes to both cytoplasm and mitochondria; mutant shows virulence defect	-1.59902	-0.98829	1.57572e-05
orf19.2540	ORF19.2540	SAS3	Similar to silencing proteins; increased transcription is observed upon fluphenazine treatment; rat catheter biofilm repressed	1.27002	0.39661	0.0202
orf19.2540_RC	ORF19.2540	SAS3	Similar to silencing proteins; increased transcription is observed upon fluphenazine treatment; rat catheter biofilm repressed	-1.04772	-0.1378	0.24616
orf19.255	ORF19.255	ZCF1	Zn(II)2Cys6 transcription factor; transcript regulated during hypha formation; 5'-UTR intron; mutants show decreased colonization of mouse kidneys; flow model biofilm induced; Spider biofilm induced	-1.18286	-0.51589	0.07214
orf19.255_RC	ORF19.255	ZCF1	Zn(II)2Cys6 transcription factor; transcript regulated during hypha formation; 5'-UTR intron; mutants show decreased colonization of mouse kidneys; flow model biofilm induced; Spider biofilm induced	-1.00209	-0.08982	0.45626
orf19.259	ORF19.259	ORF19.259	Protein with a predicted role in 60S ribosomal subunit assembly; flow model biofilm induced	-1.45102	-1.01516	0.00052
orf19.259_RC	ORF19.259	ORF19.259	Protein with a predicted role in 60S ribosomal subunit assembly; flow model biofilm induced	-1.51384	-0.87399	0.00283
orf19.2612	ORF19.2612	ORF19.2612	C2H2 zinc finger transcription factor; expression reduced in ssr1 null mutant; flow model biofilm induced	-1.14408	-0.3562	0.10463
orf19.2612_RC	ORF19.2612	ORF19.2612	C2H2 zinc finger transcription factor; expression reduced in ssr1 null mutant; flow model biofilm induced	-1.38287	-0.6866	0.00263
orf19.2614	ORF19.2614	RSR1	RAS-related protein; GTP/GDP cycling required for wild-type polar bud site selection, hyphal growth guidance; role in systemic virulence in mouse; geranylgeranylation predicted; suppresses S. cerevisiae cdc24-4 mutant heat sensitivity	1.72335	1.0116	0.00963
orf19.2614_RC	ORF19.2614	RSR1	RAS-related protein; GTP/GDP cycling required for wild-type polar bud site selection, hyphal growth guidance; role in systemic virulence in mouse; geranylgeranylation predicted; suppresses S. cerevisiae cdc24-4 mutant heat sensitivity	-1.02814	-0.14091	0.60471
orf19.2647	ORF19.2647	ZCF14	Putative Zn(II)2Cys6 transcription factor; caspofungin induced	1.13771	0.1745	0.24291
orf19.2647_RC	ORF19.2647	ZCF14	Putative Zn(II)2Cys6 transcription factor; caspofungin induced	1.27739	0.61471	0.00054
orf19.2649	ORF19.2649	PCL1	Cyclin homolog; transcript induced by filamentous growth; induced by alpha pheromone in SpiderM medium	1.1843	0.25581	0.00175
orf19.2649_RC	ORF19.2649	PCL1	Cyclin homolog; transcript induced by filamentous growth; induced by alpha pheromone in SpiderM medium	1.12746	0.14984	0.0274
orf19.2674	ORF19.2674	ORF19.2674	Putative transcription factor with zinc finger DNA-binding motif; Hap43p-repressed gene	-1.68849	-1.21376	0.00059
orf19.2674_RC	ORF19.2674	ORF19.2674	Putative transcription factor with zinc finger DNA-binding motif; Hap43p-repressed gene	-1.19512	-0.49562	0.00114
orf19.2678	ORF19.2678	BUB1	Putative cell cycle checkpoint kinase; mutation confers increased sensitivity to nocodazole	1.48662	0.76538	0.02046
orf19.2678_RC	ORF19.2678	BUB1	Putative cell cycle checkpoint kinase; mutation confers increased sensitivity to nocodazole	1.09632	0.10439	0.54429
orf19.2685	ORF19.2685	PGA54	GPI-anchored protein; Hog1-repressed; induced in cyr1 or efg1 mutant or in hyphae; colony morphology-related gene regulation by Ssn6; induced in RHE model; mRNA binds She3; regulated in Spider biofilms by Tec1, Egf1, Ntd80, Rob1, Brg1	1.60861	0.86075	0.00096
orf19.2685_RC	ORF19.2685	PGA54	GPI-anchored protein; Hog1-repressed; induced in cyr1 or efg1 mutant or in hyphae; colony morphology-related gene regulation by Ssn6; induced in RHE model; mRNA binds She3; regulated in Spider biofilms by Tec1, Egf1, Ntd80, Rob1, Brg1	2.01181	1.27273	0.00167
orf19.2695	ORF19.2695	UBR1	Protein similar to S. cerevisiae Ubr1p ubiquitin-protein ligase; transposon mutation affects filamentous growth; Spider biofilm induced	1.50212	0.73479	0.01431
orf19.2695_RC	ORF19.2695	UBR1	Protein similar to S. cerevisiae Ubr1p ubiquitin-protein ligase; transposon mutation affects filamentous growth; Spider biofilm induced	1.4099	0.60713	0.05595
orf19.2699	ORF19.2699	ABP1	Ortholog of S. cerevisiae Abp1; actin-binding protein of the cortical actin cytoskeleton; caspofungin induced; protein only detected in stationary phase yeast-form cultures; Spider biofilm repressed	-2.04221	-1.94731	0.02296
orf19.2699_RC	ORF19.2699	ABP1	Ortholog of S. cerevisiae Abp1; actin-binding protein of the cortical actin cytoskeleton; caspofungin induced; protein only detected in stationary phase yeast-form cultures; Spider biofilm repressed	-1.30227	-0.7779	0.12456
orf19.2706	ORF19.2706	CRH11	GPI-anchored cell wall transglycosylase, putative ortholog of S. cerevisiae Crh1p; predicted glycosyl hydrolase domain; similar to Csf4p and to antigenic A. fumigatus Aspf9; predicted Kex2p substrate; caspofungin-induced	1.5422	0.80131	0.01988
orf19.2706_RC	ORF19.2706	CRH11	GPI-anchored cell wall transglycosylase, putative ortholog of S. cerevisiae Crh1p; predicted glycosyl hydrolase domain; similar to Csf4p and to antigenic A. fumigatus Aspf9; predicted Kex2p substrate; caspofungin-induced	1.67648	0.96544	0.01299
orf19.2728	ORF19.2728	ORF19.2728	Ortholog(s) have DNA clamp loader activity, role in DNA damage checkpoint, nucleotide-excision repair, reciprocal meiotic recombination and Rad17 RFC-like complex, nucleus localization	1.5225	1.33743	0.0002
orf19.2728_RC	ORF19.2728	ORF19.2728	Ortholog(s) have DNA clamp loader activity, role in DNA damage checkpoint, nucleotide-excision repair, reciprocal meiotic recombination and Rad17 RFC-like complex, nucleus localization	1.27836	0.85734	0.00259
orf19.2745	ORF19.2745	UME7	Putative transcription factor with zinc cluster DNA-binding motif; similar to S. cerevisiae Ume6p, which is a transcription factor involved in the regulation of meiotic genes	-1.3526	-0.76784	0.00329
orf19.2745_RC	ORF19.2745	UME7	Putative transcription factor with zinc cluster DNA-binding motif; similar to S. cerevisiae Ume6p, which is a transcription factor involved in the regulation of meiotic genes	-1.05929	-0.24775	0.29369
orf19.2752	ORF19.2752	ADR1	C2H2 transcription factor; ortholog of S. cerevisiae Adr1 but mutant phenotype suggests a different set of target genes; transposon mutation affects filamentous growth; Spider biofilm induced	-1.20982	-0.46877	0.22846
orf19.2752_RC	ORF19.2752	ADR1	C2H2 transcription factor; ortholog of S. cerevisiae Adr1 but mutant phenotype suggests a different set of target genes; transposon mutation affects filamentous growth; Spider biofilm induced	1.10574	0.11752	0.69069
orf19.2753	ORF19.2753	ZCF15	Predicted Zn(II)2Cys6 transcription factor of unknown function; rat catheter biofilm induced	-1.14317	-0.35459	0.18148
orf19.2753_RC	ORF19.2753	ZCF15	Predicted Zn(II)2Cys6 transcription factor of unknown function; rat catheter biofilm induced	1.02835	-0.02868	0.47354
orf19.2762	ORF19.2762	AHP1	Alkyl hydroperoxide reductase; immunogenic; fluconazole-induced; amphotericin B, caspofungin, alkaline repressed; core stress response induced; Ssk1/Nrg1/Tup1/Ssn6/Hog1 regulated; flow model biofilm induced; rat catheter biofilm repressed	-1.12093	-0.37526	0.00871
orf19.2762_RC	ORF19.2762	AHP1	Alkyl hydroperoxide reductase; immunogenic; fluconazole-induced; amphotericin B, caspofungin, alkaline repressed; core stress response induced; Ssk1/Nrg1/Tup1/Ssn6/Hog1 regulated; flow model biofilm induced; rat catheter biofilm repressed	1.10993	0.11069	0.13281
orf19.2765	ORF19.2765	PGA62	Adhesin-like cell wall protein; putative GPI-anchor; fluconazole-induced; induced in high iron; induced during cell wall regeneration; Cyr1 or Ras1 repressed; Tbf1 induced	1.791	1.09939	0.00799
orf19.2765_RC	ORF19.2765	PGA62	Adhesin-like cell wall protein; putative GPI-anchor; fluconazole-induced; induced in high iron; induced during cell wall regeneration; Cyr1 or Ras1 repressed; Tbf1 induced	2.18665	1.48929	0.0048
orf19.2767	ORF19.2767	PGA59	Adhesin-like cell wall protein; putative GPI-anchor; colony morphology-related gene regulation by Ssn6; Hap43-induced; Spider biofilm repressed	2.73288	1.84913	7.82552e-06
orf19.2767_RC	ORF19.2767	PGA59	Adhesin-like cell wall protein; putative GPI-anchor; colony morphology-related gene regulation by Ssn6; Hap43-induced; Spider biofilm repressed	2.92565	2.07793	1.85466e-06
orf19.2771	ORF19.2771	BEM3	Putative GTPase-activating protein (GAP) for Rho-type GTPase Cdc42p; involved in cell signaling pathways that control cell polarity; similar to S. cerevisiae Bem3p	2.03956	1.31466	0.00023
orf19.2771_RC	ORF19.2771	BEM3	Putative GTPase-activating protein (GAP) for Rho-type GTPase Cdc42p; involved in cell signaling pathways that control cell polarity; similar to S. cerevisiae Bem3p	2.58298	1.75429	0.00019
orf19.2781	ORF19.2781	ORF19.2781	Protein with predicted serine/threonine kinase and tyrosine kinase domains; possibly an essential gene, disruptants not obtained by UAU1 method; Spider biofilm induced	-2.41345	-1.86016	0.00157
orf19.2781_RC	ORF19.2781	ORF19.2781	Protein with predicted serine/threonine kinase and tyrosine kinase domains; possibly an essential gene, disruptants not obtained by UAU1 method; Spider biofilm induced	-2.34404	-1.73618	0.00353
orf19.2791	ORF19.2791	BBC1	Putative SH3-domain-containing protein	1.4567	0.71353	0.0121
orf19.2791_RC	ORF19.2791	BBC1	Putative SH3-domain-containing protein	1.59776	0.81678	0.0119
orf19.2808	ORF19.2808	ZCF16	Predicted Zn(II)2Cys6 transcription factor; mutants are viable; rat catheter biofilm induced	1.96035	1.26906	0.00311
orf19.2808_RC	ORF19.2808	ZCF16	Predicted Zn(II)2Cys6 transcription factor; mutants are viable; rat catheter biofilm induced	1.11527	0.11803	0.08802
orf19.2823	ORF19.2823	RFG1	HMG domain transcriptional repressor of filamentous growth and hyphal genes; in Tup1-dependent and -independent pathways; binds DNA; transcript not regulated by oxygen or serum; not responsible for hypoxic repression; Spider biofilm induced	1.33739	0.50075	0.01051
orf19.2823_RC	ORF19.2823	RFG1	HMG domain transcriptional repressor of filamentous growth and hyphal genes; in Tup1-dependent and -independent pathways; binds DNA; transcript not regulated by oxygen or serum; not responsible for hypoxic repression; Spider biofilm induced	1.14484	0.18754	0.04679
orf19.2833	ORF19.2833	PGA34	Putative GPI-anchored protein; transcript repressed by alpha pheromone in SpiderM medium; induced in oralpharyngeal candidasis; flow model biofilm induced; Spider biofilm induced	2.28835	1.5958	0.00253
orf19.2833_RC	ORF19.2833	PGA34	Putative GPI-anchored protein; transcript repressed by alpha pheromone in SpiderM medium; induced in oralpharyngeal candidasis; flow model biofilm induced; Spider biofilm induced	2.42532	1.67612	0.00474
orf19.2843	ORF19.2843	RHO1	Small GTPase of Rho family; regulates beta-1,3-glucan synthesis activity and binds Gsc1p; essential; expected to be geranylgeranylated by geranylgeranyltransferase type I; plasma membrane-localized	-1.01264	0.28667	0.61875
orf19.2843_RC	ORF19.2843	RHO1	Small GTPase of Rho family; regulates beta-1,3-glucan synthesis activity and binds Gsc1p; essential; expected to be geranylgeranylated by geranylgeranyltransferase type I; plasma membrane-localized	-1.02658	-0.22715	0.26681
orf19.2876	ORF19.2876	CBF1	Transcription factor; binds ribosomal protein gene promoters and rDNA locus with Tbf1; regulates sulfur starvation-response, respiratory, glycolytic genes; does not bind to centromeres as does S. cerevisiae Cbf1; Spider biofilm repressed	-1.05404	-0.21916	0.75854
orf19.2876_RC	ORF19.2876	CBF1	Transcription factor; binds ribosomal protein gene promoters and rDNA locus with Tbf1; regulates sulfur starvation-response, respiratory, glycolytic genes; does not bind to centromeres as does S. cerevisiae Cbf1; Spider biofilm repressed	-1.04829	-0.21702	0.59852
orf19.2878	ORF19.2878	PGA15	Putative GPI-anchored protein	3.48419	2.68974	0.00245
orf19.2878_RC	ORF19.2878	PGA15	Putative GPI-anchored protein	4.17219	3.14554	0.00332
orf19.2879	ORF19.2879	IFF5	Putative GPI-anchored protein; adhesin-like protein; possibly an essential gene, disruptants not obtained by UAU1 method	1.22672	0.2966	0.02199
orf19.2879_RC	ORF19.2879	IFF5	Putative GPI-anchored protein; adhesin-like protein; possibly an essential gene, disruptants not obtained by UAU1 method	1.68839	0.97031	0.00204
orf19.2886	ORF19.2886	CEK1	ERK-family protein kinase; required for wild-type yeast-hypha switch, mating efficiency, virulence in mice; Cst20-Hst7-Cek1-Cph1 MAPK pathway regulates mating, and invasive hyphal growth under some conditions; Spider biofilm induced	-2.08179	-1.56231	0.00058
orf19.2886_RC	ORF19.2886	CEK1	ERK-family protein kinase; required for wild-type yeast-hypha switch, mating efficiency, virulence in mice; Cst20-Hst7-Cek1-Cph1 MAPK pathway regulates mating, and invasive hyphal growth under some conditions; Spider biofilm induced	-2.4266	-1.77642	0.00132
orf19.2906	ORF19.2906	PGA41	Putative GPI-anchored protein; adhesin-like protein	2.33685	1.7687	0.02457
orf19.2906_RC	ORF19.2906	PGA41	Putative GPI-anchored protein; adhesin-like protein	2.08269	1.42009	0.04236
orf19.2907	ORF19.2907	PGA42	Putative GPI-anchored adhesin-like protein; decreased transcription is observed in azole-resistant strains that overexpress CDR1 and CDR2 or MDR1	2.31377	1.64651	0.00516
orf19.2907_RC	ORF19.2907	PGA42	Putative GPI-anchored adhesin-like protein; decreased transcription is observed in azole-resistant strains that overexpress CDR1 and CDR2 or MDR1	2.56226	1.84183	0.00304
orf19.2961	ORF19.2961	ORF19.2961	Putative transcription factor with zinc finger DNA-binding motif	-1.0273	-0.04713	0.57255
orf19.2961_RC	ORF19.2961	ORF19.2961	Putative transcription factor with zinc finger DNA-binding motif	-1.0802	-0.48391	0.35623
orf19.2969	ORF19.2969	RAD16	Ortholog of S. cerevisiae Rad16; a protein that recognizes and binds damaged DNA; flucytosine induced; rat catheter and Spider biofilm induced	1.04089	-0.01357	0.80161
orf19.2969_RC	ORF19.2969	RAD16	Ortholog of S. cerevisiae Rad16; a protein that recognizes and binds damaged DNA; flucytosine induced; rat catheter and Spider biofilm induced	1.19025	0.25566	0.00122
orf19.2983	ORF19.2983	CDC73	Putative transcription elongation factor; cdc73 kap114 double transposon mutation affects filamentous growth; Spider biofilm repressed	-1.00953	0.16016	0.37769
orf19.2983_RC	ORF19.2983	CDC73	Putative transcription elongation factor; cdc73 kap114 double transposon mutation affects filamentous growth; Spider biofilm repressed	-1.04971	-0.34406	0.13231
orf19.3001	ORF19.3001	TEM1	Protein similar to S. cerevisiae Tem1p, which is a GTPase involved in termination of the M phase of the cell cycle; induced under Cdc5p depletion	-1.21717	-0.48096	0.03945
orf19.3001_RC	ORF19.3001	TEM1	Protein similar to S. cerevisiae Tem1p, which is a GTPase involved in termination of the M phase of the cell cycle; induced under Cdc5p depletion	-1.37923	-0.73281	0.01334
orf19.3010.1	ORF19.3010.1	ECM33	GPI-anchored cell wall protein; mutants show cell-wall defects and reduced adhesion, host cell damage, and endocytosis; mutant infection is immunoprotective in murine model; fluconazole-induced; caspofungin repressed	1.71973	1.00737	0.0177
orf19.3010.1_RC	ORF19.3010.1	ECM33	GPI-anchored cell wall protein; mutants show cell-wall defects and reduced adhesion, host cell damage, and endocytosis; mutant infection is immunoprotective in murine model; fluconazole-induced; caspofungin repressed	1.72658	0.95853	0.01906
orf19.3012	ORF19.3012	ARO80	Zn(II)2Cys6 transcription factor; transcriptional activator of aromatic amino acid catabolism; regulator of aromatic alcohol biosynthesis via the Ehrlich pathway; mutant is viable	1.40638	0.60209	0.00914
orf19.3012_RC	ORF19.3012	ARO80	Zn(II)2Cys6 transcription factor; transcriptional activator of aromatic amino acid catabolism; regulator of aromatic alcohol biosynthesis via the Ehrlich pathway; mutant is viable	1.18039	0.24914	0.17228
orf19.3014	ORF19.3014	BMH1	Sole 14-3-3 protein in C. albicans; role in hyphal growth; possibly regulated by host interaction; localizes to yeast-form cell surface, not hyphae; alternatively spliced 5' UTR intron; Spider biofilm repressed	-1.326	-0.6535	2.80401e-05
orf19.3014_RC	ORF19.3014	BMH1	Sole 14-3-3 protein in C. albicans; role in hyphal growth; possibly regulated by host interaction; localizes to yeast-form cell surface, not hyphae; alternatively spliced 5' UTR intron; Spider biofilm repressed	-1.44971	-0.77456	0.00298
orf19.3018	ORF19.3018	SPP1	Putative histone methyltransferase; induced by nitric oxide independent of Yhb1p; cell-cycle regulated periodic mRNA expression	1.24645	0.34419	0.03454
orf19.3018_RC	ORF19.3018	SPP1	Putative histone methyltransferase; induced by nitric oxide independent of Yhb1p; cell-cycle regulated periodic mRNA expression	1.23535	0.37911	0.03797
orf19.3049	ORF19.3049	ORF19.3049	Ortholog(s) have protein kinase activity, role in activation of bipolar cell growth, ascospore wall assembly, protein phosphorylation and cell division site, cytosol, nucleus, prospore membrane localization	1.10807	0.12176	0.2333
orf19.3049_RC	ORF19.3049	ORF19.3049	Ortholog(s) have protein kinase activity, role in activation of bipolar cell growth, ascospore wall assembly, protein phosphorylation and cell division site, cytosol, nucleus, prospore membrane localization	-1.0963	-0.26222	0.11947
orf19.3071	ORF19.3071	MIH1	Putative protein phosphatase of the PTP family (tyrosine-specific); ortholog of S. cerevisiae Mih1; mRNA binds She3	2.039	1.25883	0.00086
orf19.3071_RC	ORF19.3071	MIH1	Putative protein phosphatase of the PTP family (tyrosine-specific); ortholog of S. cerevisiae Mih1; mRNA binds She3	1.9041	1.21256	0.00343
orf19.3077	ORF19.3077	VID21	Subunit of the NuA4 histone acetyltransferase complex; soluble protein in hyphae; Spider biofilm repressed	1.13872	0.17674	0.1709
orf19.3077_RC	ORF19.3077	VID21	Subunit of the NuA4 histone acetyltransferase complex; soluble protein in hyphae; Spider biofilm repressed	-1.1755	-0.37567	0.05488
orf19.3083	ORF19.3083	ORF19.3083	Putative lipid phosphatase of the endoplasmic reticulum; role in DNA repair, actin cytoskeleton organization, cellular manganese ion homeostasis; Spider biofilm repressed	-1.02591	-0.22203	0.92001
orf19.3083_RC	ORF19.3083	ORF19.3083	Putative lipid phosphatase of the endoplasmic reticulum; role in DNA repair, actin cytoskeleton organization, cellular manganese ion homeostasis; Spider biofilm repressed	-1.04939	-0.40045	0.66509
orf19.3088	ORF19.3088	ORF19.3088	bZIP transcription factor; possibly transcriptionally regulated upon hyphal formation; Hap43; F-12/CO2 early biofilm induced; Spider biofilm induced	1.51045	0.74593	0.01107
orf19.3088_RC	ORF19.3088	ORF19.3088	bZIP transcription factor; possibly transcriptionally regulated upon hyphal formation; Hap43; F-12/CO2 early biofilm induced; Spider biofilm induced	1.18901	0.2304	0.18589
orf19.3093	ORF19.3093	MSH2	Putative DNA mismatch repair factor; transcript regulated by Nrg1; flucytosine repressed; transcript regulated by tyrosol and cell density	-1.03129	-0.16646	0.24313
orf19.3093_RC	ORF19.3093	MSH2	Putative DNA mismatch repair factor; transcript regulated by Nrg1; flucytosine repressed; transcript regulated by tyrosol and cell density	-1.03285	-0.19601	0.68628
orf19.3127	ORF19.3127	CZF1	Transcription factor; regulates white-opaque switch; hyphal growth regulator; expression in S. cerevisiae causes dominant-negative inhibition of pheromone response; required for yeast cell adherence to silicone; Spider biofilm induced	-1.76966	-1.15158	0.0079
orf19.3127_RC	ORF19.3127	CZF1	Transcription factor; regulates white-opaque switch; hyphal growth regulator; expression in S. cerevisiae causes dominant-negative inhibition of pheromone response; required for yeast cell adherence to silicone; Spider biofilm induced	-1.09206	-0.27904	0.13805
orf19.3149	ORF19.3149	LSP1	Eisosome component with a predicted role in endocytosis; protein present in exponential and stationary growth phase yeast cultures; caspofungin repressed; biofilm induced; fungal-specific (no human/murine homolog); sumoylation target	-1.0346	-0.21174	0.55467
orf19.3149_RC	ORF19.3149	LSP1	Eisosome component with a predicted role in endocytosis; protein present in exponential and stationary growth phase yeast cultures; caspofungin repressed; biofilm induced; fungal-specific (no human/murine homolog); sumoylation target	-1.07112	-0.4465	0.02207
orf19.3153	ORF19.3153	MSS4	Phosphatidylinositol-4-phosphate 5-kinase; activity induced by phosphatidic acid (Pld1 product); macrophage/pseudohyphal-repressed; mRNA binds to She3, localized to yeast cell buds and hyphal tips; Hap43-induced; Spider biofilm induced	-1.07517	-1.10541	0.02476
orf19.3153_RC	ORF19.3153	MSS4	Phosphatidylinositol-4-phosphate 5-kinase; activity induced by phosphatidic acid (Pld1 product); macrophage/pseudohyphal-repressed; mRNA binds to She3, localized to yeast cell buds and hyphal tips; Hap43-induced; Spider biofilm induced	-1.09162	-1.45816	0.03299
orf19.3174	ORF19.3174	CDC24	GDP-GTP exchange factor for Cdc42p; phosphorylated; required for maintenance of hyphal growth; misexpression blocks hyphal growth and causes avirulence in a mouse model of systemic infection; antigenic during human oral infection	7.1198	3.86983	0.0019
orf19.3174_RC	ORF19.3174	CDC24	GDP-GTP exchange factor for Cdc42p; phosphorylated; required for maintenance of hyphal growth; misexpression blocks hyphal growth and causes avirulence in a mouse model of systemic infection; antigenic during human oral infection	4.86142	2.99835	0.00171
orf19.3178	ORF19.3178	ORF19.3178	Ortholog(s) have RNA binding activity, role in mRNA splicing, via spliceosome and U2-type prespliceosome localization	-1.22788	-0.49862	0.00296
orf19.3178_RC	ORF19.3178	ORF19.3178	Ortholog(s) have RNA binding activity, role in mRNA splicing, via spliceosome and U2-type prespliceosome localization	-1.22128	-0.47564	0.00805
orf19.3187	ORF19.3187	ZNC1	Zn(2)-Cys(6) transcription factor; regulated by Gcn2 and Gcn4; gene located in zinc cluster region of Chromosome 5, near the MTL locus; required for yeast cell adherence to silicone substrate; Spider biofilm induced	1.39391	0.58415	0.01091
orf19.3187_RC	ORF19.3187	ZNC1	Zn(2)-Cys(6) transcription factor; regulated by Gcn2 and Gcn4; gene located in zinc cluster region of Chromosome 5, near the MTL locus; required for yeast cell adherence to silicone substrate; Spider biofilm induced	1.39759	0.54366	0.0097
orf19.3188	ORF19.3188	TAC1	Zn(2)-Cys(6) transcriptional activator of drug-responsive genes (CDR1 and CDR2); binds DRE element; gene in zinc cluster region near MTL locus; resequencing indicates that TAC1 spans orf19.3188 and orf19.3189; Spider biofilm induced	2.08974	1.4707	0.00257
orf19.3188_RC	ORF19.3188	TAC1	Zn(2)-Cys(6) transcriptional activator of drug-responsive genes (CDR1 and CDR2); binds DRE element; gene in zinc cluster region near MTL locus; resequencing indicates that TAC1 spans orf19.3188 and orf19.3189; Spider biofilm induced	2.24274	1.52809	0.00309
orf19.3199	ORF19.3199	PIKA	Putative phosphatidylinositol kinase; non-sex gene located within the MTLa mating-type-like locus	1.87473	1.18123	0.00463
orf19.3199_RC	ORF19.3199	PIKA	Putative phosphatidylinositol kinase; non-sex gene located within the MTLa mating-type-like locus	2.20745	1.39853	0.00105
orf19.3200	ORF19.3200	MTLA2	Master regulator (activator) of a-type mating; has HMG domain, which is predicted to bind DNA; gene has intron; not related to S. cerevisiae MATa2; a/alpha mating type may increase virulence, provides competitive advantage	-1.0356	-0.18373	0.38223
orf19.3200_RC	ORF19.3200	MTLA2	Master regulator (activator) of a-type mating; has HMG domain, which is predicted to bind DNA; gene has intron; not related to S. cerevisiae MATa2; a/alpha mating type may increase virulence, provides competitive advantage	1.15548	0.31095	0.0506
orf19.3201	ORF19.3201	MTLA1	Homeodomain protein of the MTLa mating type locus; a1 and alpha2 together repress white-opaque switching and mating (an opaque-specific process); a/alpha mating type may increase virulence by competitive advantage; Spider biofilm induced	1.18491	0.3002	0.43047
orf19.3201_RC	ORF19.3201	MTLA1	Homeodomain protein of the MTLa mating type locus; a1 and alpha2 together repress white-opaque switching and mating (an opaque-specific process); a/alpha mating type may increase virulence by competitive advantage; Spider biofilm induced	1.45807	0.6933	0.0008
orf19.3207	ORF19.3207	CCN1	G1 cyclin; required for hyphal growth maintenance (not initiation); cell-cycle regulated transcription (G1/S); Cdc28p-Ccn1p initiates Cdc11p S394 phosphorylation on hyphal induction; expression in S. cerevisiae inhibits pheromone response	-1.53645	-0.98127	0.03094
orf19.3207_RC	ORF19.3207	CCN1	G1 cyclin; required for hyphal growth maintenance (not initiation); cell-cycle regulated transcription (G1/S); Cdc28p-Ccn1p initiates Cdc11p S394 phosphorylation on hyphal induction; expression in S. cerevisiae inhibits pheromone response	-1.02929	-0.17233	0.967
orf19.3231	ORF19.3231	CDC27	Putative ubiquitin-protein ligase; periodic mRNA expression, peak at cell-cycle S/G2 phase	-1.00409	0.48373	0.26321
orf19.3231_RC	ORF19.3231	CDC27	Putative ubiquitin-protein ligase; periodic mRNA expression, peak at cell-cycle S/G2 phase	-1.02499	0.00514	0.47669
orf19.3252	ORF19.3252	DAL81	Zn(II)2Cys6 transcription factor; ortholog of S. cerevisiae Dal81, involved in the regulation of nitrogen-degradation genes; required for yeast cell adherence to silicone substrate; Spider biofilm induced	-1.16261	-0.44358	0.00268
orf19.3252_RC	ORF19.3252	DAL81	Zn(II)2Cys6 transcription factor; ortholog of S. cerevisiae Dal81, involved in the regulation of nitrogen-degradation genes; required for yeast cell adherence to silicone substrate; Spider biofilm induced	-1.33873	-0.62537	0.0068
orf19.3256	ORF19.3256	SLN1	Histidine kinase involved in a two-component signaling pathway that regulates cell wall biosynthesis; mutants are sensitive to growth on H2O2 medium; rat catheter and Spider biofilm induced	2.11716	1.42626	3.69101e-05
orf19.3256_RC	ORF19.3256	SLN1	Histidine kinase involved in a two-component signaling pathway that regulates cell wall biosynthesis; mutants are sensitive to growth on H2O2 medium; rat catheter and Spider biofilm induced	1.79026	1.08834	8.4321e-05
orf19.3263	ORF19.3263	ATO10	Putative fungal-specific transmembrane protein; rat catheter and Spider biofilm induced	1.31169	0.80502	0.01541
orf19.3263_RC	ORF19.3263	ATO10	Putative fungal-specific transmembrane protein; rat catheter and Spider biofilm induced	1.10627	0.31642	0.21057
orf19.3264	ORF19.3264	CCE1	Putative Holliday junction resolving enzyme; similar to S. cerevisiae Cce1p	-1.04339	-0.21546	0.15967
orf19.3264_RC	ORF19.3264	CCE1	Putative Holliday junction resolving enzyme; similar to S. cerevisiae Cce1p	-1.00403	-0.04043	0.45333
orf19.3281	ORF19.3281	ORF19.3281	Ortholog(s) have histone demethylase activity (H3-K36 specific), methylated histone residue binding activity and role in histone demethylation	-1.56794	-0.92646	0.00385
orf19.3281_RC	ORF19.3281	ORF19.3281	Ortholog(s) have histone demethylase activity (H3-K36 specific), methylated histone residue binding activity and role in histone demethylation	-1.00531	-0.12876	0.55221
orf19.3294	ORF19.3294	MBF1	Putative transcriptional coactivator; caspofungin repressed	-1.06512	-0.1992	0.41795
orf19.3294_RC	ORF19.3294	MBF1	Putative transcriptional coactivator; caspofungin repressed	-1.04183	-0.12075	0.29039
orf19.3300	ORF19.3300	ZPR1	Protein with putative zinc finger; regulated by Gcn4p; repressed in response to amino acid starvation (3-aminotriazole treatment); upregulation correlates with clinical development of fluconazole resistance	-1.02192	0.07608	0.47283
orf19.3300_RC	ORF19.3300	ZPR1	Protein with putative zinc finger; regulated by Gcn4p; repressed in response to amino acid starvation (3-aminotriazole treatment); upregulation correlates with clinical development of fluconazole resistance	-1.09169	-1.1543	0.85772
orf19.3302	ORF19.3302	ORF19.3302	Putative type-1 protein phosphatase targeting subunit; transcript repressed by yeast-hyphal switch; transcript induced by Mnl1p under weak acid stress; flow model biofilm induced	-1.03142	-0.15745	0.75407
orf19.3302_RC	ORF19.3302	ORF19.3302	Putative type-1 protein phosphatase targeting subunit; transcript repressed by yeast-hyphal switch; transcript induced by Mnl1p under weak acid stress; flow model biofilm induced	-1.01731	-0.17932	0.07493
orf19.3305	ORF19.3305	ZCF17	Putative Zn(II)2Cys6 transcription factor	-1.00632	-0.08192	0.58851
orf19.3305_RC	ORF19.3305	ZCF17	Putative Zn(II)2Cys6 transcription factor	-1.01788	-0.11072	0.84536
orf19.3308	ORF19.3308	STB5	Putative transcription factor with zinc cluster DNA-binding motif; has similarity to S. cerevisiae Stb5p; Hap43p-repressed gene	-2.76289	-2.04016	0.00185
orf19.3308_RC	ORF19.3308	STB5	Putative transcription factor with zinc cluster DNA-binding motif; has similarity to S. cerevisiae Stb5p; Hap43p-repressed gene	-3.04603	-2.32916	0.00358
orf19.3330	ORF19.3330	CRL1	Predicted GTPase of RHO family; CAAX motif geranylgeranylated; expression in S. cerevisiae causes dominant-negative inhibition of pheromone response	1.117	0.13794	0.54743
orf19.3330_RC	ORF19.3330	CRL1	Predicted GTPase of RHO family; CAAX motif geranylgeranylated; expression in S. cerevisiae causes dominant-negative inhibition of pheromone response	1.14019	0.17934	0.61201
orf19.3415	ORF19.3415	PTK2	Putative protein kinase of polyamine import; mutation confers hypersensitivity to high concentrations of tunicamycin; YPD flow model biofilm induced; rat catheter and Spider biofilm induced	1.79234	1.03058	0.00235
orf19.3415_RC	ORF19.3415	PTK2	Putative protein kinase of polyamine import; mutation confers hypersensitivity to high concentrations of tunicamycin; YPD flow model biofilm induced; rat catheter and Spider biofilm induced	1.76817	1.52982	0.00322
orf19.3425	ORF19.3425	ORF19.3425	RING/FYVE/PHD zinc finger protein; Spider biofilm induced	-1.03633	-0.27063	0.0348
orf19.3425_RC	ORF19.3425	ORF19.3425	RING/FYVE/PHD zinc finger protein; Spider biofilm induced	-1.04856	-0.5231	0.01609
orf19.3434	ORF19.3434	TRY5	Zn(II)2Cys6 transcription factor; regulator of yeast form adherence; required for yeast cell adherence to silicone substrate	1.22939	0.33109	0.00441
orf19.3434_RC	ORF19.3434	TRY5	Zn(II)2Cys6 transcription factor; regulator of yeast form adherence; required for yeast cell adherence to silicone substrate	1.65505	0.89561	7.22998e-05
orf19.3449	ORF19.3449	ORF19.3449	Ortholog(s) have ubiquitin-protein ligase activity, role in histone catabolic process, histone ubiquitination and cytoplasm, ribosome localization	1.54282	0.78762	0.26891
orf19.3449_RC	ORF19.3449	ORF19.3449	Ortholog(s) have ubiquitin-protein ligase activity, role in histone catabolic process, histone ubiquitination and cytoplasm, ribosome localization	1.43842	0.85242	0.06147
orf19.3456	ORF19.3456	ORF19.3456	Protein with a predicted serine/threonine kinase and tyrosine kinase domain; possibly an essential gene, disruptants not obtained by UAU1 method	-1.89	-1.59333	0.0008
orf19.3456_RC	ORF19.3456	ORF19.3456	Protein with a predicted serine/threonine kinase and tyrosine kinase domain; possibly an essential gene, disruptants not obtained by UAU1 method	-1.49914	-1.06344	0.00062
orf19.3459	ORF19.3459	ORF19.3459	Putative serine/threonine/tyrosine (dual-specificity) kinase; disruptants not obtained by UAU1 method	2.10512	2.16219	0.00535
orf19.3459_RC	ORF19.3459	ORF19.3459	Putative serine/threonine/tyrosine (dual-specificity) kinase; disruptants not obtained by UAU1 method	2.30158	2.36854	0.00977
orf19.3474	ORF19.3474	IPL1	Putative Aurora kinase; Hap43-induced; induced during planktonic growth; possibly an essential gene, disruptants not obtained by UAU1 method	1.06712	0.04589	0.0361
orf19.3474_RC	ORF19.3474	IPL1	Putative Aurora kinase; Hap43-induced; induced during planktonic growth; possibly an essential gene, disruptants not obtained by UAU1 method	-1.45558	-0.84137	0.00081
orf19.35	ORF19.35	ORF19.35	Predicted kinase; rat catheter, flow model, Spider biofilm induced	1.90486	1.21337	0.00638
orf19.35_RC	ORF19.35	ORF19.35	Predicted kinase; rat catheter, flow model, Spider biofilm induced	1.83595	1.13912	0.01464
orf19.3506	ORF19.3506	DBR1	Debranchase; homozygous mutant accumulates lariat intermediates of mRNA splicing; rat catheter biofilm repressed	-1.01899	-0.1229	0.39212
orf19.3506_RC	ORF19.3506	DBR1	Debranchase; homozygous mutant accumulates lariat intermediates of mRNA splicing; rat catheter biofilm repressed	-1.29197	-0.60112	0.0293
orf19.3530	ORF19.3530	CKA2	Catalytic alpha-subunit of protein kinase CK2; interaction with calcineurin pathway affects fluconazole sensitivity; synthetically lethal with CKA1; attenuated virulence in a mouse oropharyngeal candidiasis but not in a systemic mouse model	-1.15153	-0.36926	0.00033
orf19.3530_RC	ORF19.3530	CKA2	Catalytic alpha-subunit of protein kinase CK2; interaction with calcineurin pathway affects fluconazole sensitivity; synthetically lethal with CKA1; attenuated virulence in a mouse oropharyngeal candidiasis but not in a systemic mouse model	-1.63	-1.02193	0.00164
orf19.3534	ORF19.3534	RHO3	Putative Rho family GTPase; possible substrate of protein farnesyltransferase and geranylgeranyltransferase type I; greater transcription in hyphal form than yeast form; plasma membrane-localized	-2.57902	-1.91687	0.00362
orf19.3534_RC	ORF19.3534	RHO3	Putative Rho family GTPase; possible substrate of protein farnesyltransferase and geranylgeranyltransferase type I; greater transcription in hyphal form than yeast form; plasma membrane-localized	-1.61461	-0.99765	0.00771
orf19.3551	ORF19.3551	DAD2	Essential subunit of the Dam1 (DASH) complex, which acts in chromosome segregation by coupling kinetochores to spindle microtubules	-1.06394	-0.86145	0.80107
orf19.3551_RC	ORF19.3551	DAD2	Essential subunit of the Dam1 (DASH) complex, which acts in chromosome segregation by coupling kinetochores to spindle microtubules	-1.02702	-0.08595	0.84802
orf19.3561	ORF19.3561	CDC7	Putative kinase; cell-cycle regulated periodic mRNA expression; S. cerevisiae ortholog is not cell-cycle regulated; possibly an essential gene, disruptants not obtained by UAU1 method	-1.23264	-0.54977	0.00896
orf19.3561_RC	ORF19.3561	CDC7	Putative kinase; cell-cycle regulated periodic mRNA expression; S. cerevisiae ortholog is not cell-cycle regulated; possibly an essential gene, disruptants not obtained by UAU1 method	-1.10771	-0.38007	0.00098
orf19.3613	ORF19.3613	ORF19.3613	Ortholog(s) have RNA polymerase II core binding, RNA polymerase II core promoter sequence-specific DNA binding transcription factor activity, TFIIF-class binding transcription factor activity, chromatin binding activity	1.0652	0.22435	0.82958
orf19.3613_RC	ORF19.3613	ORF19.3613	Ortholog(s) have RNA polymerase II core binding, RNA polymerase II core promoter sequence-specific DNA binding transcription factor activity, TFIIF-class binding transcription factor activity, chromatin binding activity	1.1242	0.41668	0.50013
orf19.3642	ORF19.3642	SUN41	Cell wall glycosidase; role in biofilm formation and cell separation; possibly secreted; hypoxia, hyphal induced; caspofungin repressed; Efg1, Cph1 regulated; O-glycosylated, possible Kex2 substrate; 5'-UTR intron; Spider biofilm induced	-1.244	-0.5249	0.26396
orf19.3642_RC	ORF19.3642	SUN41	Cell wall glycosidase; role in biofilm formation and cell separation; possibly secreted; hypoxia, hyphal induced; caspofungin repressed; Efg1, Cph1 regulated; O-glycosylated, possible Kex2 substrate; 5'-UTR intron; Spider biofilm induced	-1.01656	-0.11809	0.86979
orf19.3669	ORF19.3669	SHA3	Putative ser/thr kinase involved in glucose transport; Tn mutation affects filamentous growth; fluconazole-induced; ketoconazole-repressed; induced in by alpha pheromone in SpiderM; possibly essential; flow model biofilm induced	-1.00008	0.57663	0.89368
orf19.3669_RC	ORF19.3669	SHA3	Putative ser/thr kinase involved in glucose transport; Tn mutation affects filamentous growth; fluconazole-induced; ketoconazole-repressed; induced in by alpha pheromone in SpiderM; possibly essential; flow model biofilm induced	-1.02929	-0.09218	0.85086
orf19.3683	ORF19.3683	AGE3	Putative ADP-ribosylation factor GTPase activating protein, functional ortholog of S. cerevisiae GCS1; mutation affects endocytosis, hyphal growth, chemical and drug resistance, and sensitivity to cell wall inhibitors	1.16705	0.22625	0.07172
orf19.3683_RC	ORF19.3683	AGE3	Putative ADP-ribosylation factor GTPase activating protein, functional ortholog of S. cerevisiae GCS1; mutation affects endocytosis, hyphal growth, chemical and drug resistance, and sensitivity to cell wall inhibitors	1.49158	0.95428	0.0085
orf19.3715	ORF19.3715	ASF1	Protein similar to S. cerevisiae Asf1p, a chromatin assembly complex component; likely to be essential for growth, based on an insertional mutagenesis strategy	-1.1244	-1.16268	0.04005
orf19.3715_RC	ORF19.3715	ASF1	Protein similar to S. cerevisiae Asf1p, a chromatin assembly complex component; likely to be essential for growth, based on an insertional mutagenesis strategy	-1.03452	-0.19088	0.17425
orf19.3738	ORF19.3738	PGA22	Putative GPI-anchored protein; adhesin-like protein	3.06135	2.332	0.00505
orf19.3738_RC	ORF19.3738	PGA22	Putative GPI-anchored protein; adhesin-like protein	2.81667	2.00144	0.01247
orf19.3740	ORF19.3740	PGA23	Putative GPI-anchored protein of unknown function; Rim101-repressed; Cyr1-regulated; colony morphology-related gene regulation by Ssn6	1.09023	0.09324	0.50189
orf19.3740_RC	ORF19.3740	PGA23	Putative GPI-anchored protein of unknown function; Rim101-repressed; Cyr1-regulated; colony morphology-related gene regulation by Ssn6	1.04649	0.00655	0.81679
orf19.3751	ORF19.3751	ORF19.3751	Putative serine/threonine protein kinase; possibly an essential gene, disruptants not obtained by UAU1 method	1.12353	0.12316	0.47303
orf19.3751_RC	ORF19.3751	ORF19.3751	Putative serine/threonine protein kinase; possibly an essential gene, disruptants not obtained by UAU1 method	1.12157	0.13508	0.00625
orf19.3752	ORF19.3752	RAD51	Protein involved in homologous recombination and DNA repair; flucytosine induced; slow growth and increased white-to-opaque switching frequency in null mutant	-1.05763	-0.27461	0.35925
orf19.3752_RC	ORF19.3752	RAD51	Protein involved in homologous recombination and DNA repair; flucytosine induced; slow growth and increased white-to-opaque switching frequency in null mutant	-1.33089	-1.12848	0.06543
orf19.3753	ORF19.3753	SEF1	Zn2-Cys6 transcription factor; regulates iron uptake; negatively regulated by Sfu1p, positively regulated by Tbf1; promotes virulence in mice; mutants display decreased colonization of mouse kidneys; Spider biofilm induced	1.26331	0.38594	0.2034
orf19.3753_RC	ORF19.3753	SEF1	Zn2-Cys6 transcription factor; regulates iron uptake; negatively regulated by Sfu1p, positively regulated by Tbf1; promotes virulence in mice; mutants display decreased colonization of mouse kidneys; Spider biofilm induced	1.26694	0.3686	0.15815
orf19.3764	ORF19.3764	GSG1	Putative subunit of the TRAPP complex; involved in targeting of ER-to-Golgi transport vesicles; flow model biofilm induced	1.09892	0.24482	0.95308
orf19.3764_RC	ORF19.3764	GSG1	Putative subunit of the TRAPP complex; involved in targeting of ER-to-Golgi transport vesicles; flow model biofilm induced	-1.32985	-0.98646	0.00038
orf19.3774	ORF19.3774	PPG1	Putative protein phosphatase of the Type 2A-related family (serine/threonine-specific), similar to S. cerevisiae Ppg1p; possibly an essential gene, disruptants not obtained by UAU1 method	-1.3318	-0.80031	0.0023
orf19.3774_RC	ORF19.3774	PPG1	Putative protein phosphatase of the Type 2A-related family (serine/threonine-specific), similar to S. cerevisiae Ppg1p; possibly an essential gene, disruptants not obtained by UAU1 method	1.00188	-0.0929	0.60305
orf19.3794	ORF19.3794	CSR1	Transcription factor; role in zinc homeostasis and regulation of Spider biofilm matrix; mutation affects filamentous growth; can suppress S. cerevisiae rok1 mutant inviability; Spider biofilm induced; mutants for abnormal Spider biofilms	-1.58251	-1.00982	0.00139
orf19.3794_RC	ORF19.3794	CSR1	Transcription factor; role in zinc homeostasis and regulation of Spider biofilm matrix; mutation affects filamentous growth; can suppress S. cerevisiae rok1 mutant inviability; Spider biofilm induced; mutants for abnormal Spider biofilms	-1.93699	-1.32867	0.00116
orf19.3809	ORF19.3809	BAS1	Putative Myb-like transcription factor; ortholog S. cerevisiae Bas1, a regulator of purine biosynthetic genes; mutant exhibits adenine auxotrophy and abnormal colony morphology	-1.02339	0.04133	0.8803
orf19.3809_RC	ORF19.3809	BAS1	Putative Myb-like transcription factor; ortholog S. cerevisiae Bas1, a regulator of purine biosynthetic genes; mutant exhibits adenine auxotrophy and abnormal colony morphology	-1.01886	-0.01328	0.39076
orf19.3829	ORF19.3829	PHR1	Cell surface glycosidase; may act on cell-wall beta-1,3-glucan prior to beta-1,6-glucan linkage; role in systemic, not vaginal virulence (neutral, not low pH); high pH or filamentation induced; Bcr1-repressed in RPMI a/a biofilm	1.86598	1.10672	0.00189
orf19.3829_RC	ORF19.3829	PHR1	Cell surface glycosidase; may act on cell-wall beta-1,3-glucan prior to beta-1,6-glucan linkage; role in systemic, not vaginal virulence (neutral, not low pH); high pH or filamentation induced; Bcr1-repressed in RPMI a/a biofilm	2.40709	1.70452	0.00149
orf19.384	ORF19.384	ORF19.384	Ortholog(s) have Golgi apparatus, cytosol, nucleus localization	-1.15316	-0.38746	0.0246
orf19.384_RC	ORF19.384	ORF19.384	Ortholog(s) have Golgi apparatus, cytosol, nucleus localization	-1.0435	-0.19791	0.86593
orf19.3841	ORF19.3841	ORF19.3841	Putative protein serine/threonine kinase; predicted role in vesicle formation in autophagy and the cytoplasm-to-vacuole targeting (Cvt) pathway; Spider biofilm induced	-1.31831	-0.64179	7.79149e-05
orf19.3841_RC	ORF19.3841	ORF19.3841	Putative protein serine/threonine kinase; predicted role in vesicle formation in autophagy and the cytoplasm-to-vacuole targeting (Cvt) pathway; Spider biofilm induced	-1.68617	-1.08105	0.00459
orf19.3856	ORF19.3856	CDC28	Cyclin-dependent protein kinase; interacts with regulatory subunit Cyb1; determination of cell morphology during the cell cycle; phosphorylated mostly by Swe1 and phosphorylation is regulated by Hsl1; 5'-UTR intron; Spider biofilm repressed	1.28143	0.41463	0.00454
orf19.3856_RC	ORF19.3856	CDC28	Cyclin-dependent protein kinase; interacts with regulatory subunit Cyb1; determination of cell morphology during the cell cycle; phosphorylated mostly by Swe1 and phosphorylation is regulated by Hsl1; 5'-UTR intron; Spider biofilm repressed	1.00777	-0.06941	0.67953
orf19.3865	ORF19.3865	RFX1	Transcription factor; involved in DNA damage responses, morphogenesis, and virulence; Spider biofilm induced	-1.01226	-0.12308	0.30306
orf19.3865_RC	ORF19.3865	RFX1	Transcription factor; involved in DNA damage responses, morphogenesis, and virulence; Spider biofilm induced	1.00065	-0.04984	0.96104
orf19.390	ORF19.390	CDC42	Rho-type GTPase; required for budding and maintenance of hyphal growth; GGTase I geranylgeranylated; misexpression blocks hyphal growth, causes avirulence in mouse IV infection; shows actin-dependent localization to hyphal tip	-1.24254	-0.52253	0.32576
orf19.390_RC	ORF19.390	CDC42	Rho-type GTPase; required for budding and maintenance of hyphal growth; GGTase I geranylgeranylated; misexpression blocks hyphal growth, causes avirulence in mouse IV infection; shows actin-dependent localization to hyphal tip	-1.3097	-0.62859	0.11576
orf19.3912	ORF19.3912	GLN3	GATA transcription factor, involved in regulation of nitrogen starvation-induced filamentous growth; regulates transcription of Mep2 ammonium permease; regulated by Gcn2 and Gcn4; mRNA binds She3; Spider biofilm induced	-1.42659	-0.9525	0.00158
orf19.3912_RC	ORF19.3912	GLN3	GATA transcription factor, involved in regulation of nitrogen starvation-induced filamentous growth; regulates transcription of Mep2 ammonium permease; regulated by Gcn2 and Gcn4; mRNA binds She3; Spider biofilm induced	-1.23154	-0.52695	0.00215
orf19.3923	ORF19.3923	PGA37	Putative GPI-anchored protein; Hap43-repressed; Spider biofilm induced	2.22503	1.51895	8.89e-05
orf19.3923_RC	ORF19.3923	PGA37	Putative GPI-anchored protein; Hap43-repressed; Spider biofilm induced	2.24773	1.52024	0.00045
orf19.3957	ORF19.3957	ORF19.3957	Ortholog(s) have GTP cyclohydrolase I activity, role in folic acid-containing compound biosynthetic process and cytosol, nucleus localization	-1.30699	-0.62442	0.01439
orf19.3957_RC	ORF19.3957	ORF19.3957	Ortholog(s) have GTP cyclohydrolase I activity, role in folic acid-containing compound biosynthetic process and cytosol, nucleus localization	1.05689	0.03311	0.07603
orf19.3969	ORF19.3969	SFL2	Predicted transcription factor; required for filamentous growth, for virulence in RHE model but not in mice; induced upon RHE infection but C. dubliniensis ortholog is not; Spider biofilm induced	-1.22238	-0.48958	0.55014
orf19.3969_RC	ORF19.3969	SFL2	Predicted transcription factor; required for filamentous growth, for virulence in RHE model but not in mice; induced upon RHE infection but C. dubliniensis ortholog is not; Spider biofilm induced	-1.30672	-0.57437	0.00773
orf19.3978	ORF19.3978	ORF19.3978	Protein required for maturation of 18S rRNA; rat catheter biofilm repressed	1.19411	0.4629	0.06458
orf19.3978_RC	ORF19.3978	ORF19.3978	Protein required for maturation of 18S rRNA; rat catheter biofilm repressed	1.09313	0.22749	0.08414
orf19.3986	ORF19.3986	PPR1	Putative transcription factor with zinc cluster DNA-binding motif; has similarity to S. cerevisiae Ppr1p, which is a transcription factor involved in the regulation of uracil biosynthesis genes	-1.18433	-0.42585	0.02754
orf19.3986_RC	ORF19.3986	PPR1	Putative transcription factor with zinc cluster DNA-binding motif; has similarity to S. cerevisiae Ppr1p, which is a transcription factor involved in the regulation of uracil biosynthesis genes	-1.54434	-0.96062	0.0101
orf19.399	ORF19.399	ORF19.399	Putative serine/threonine protein kinase; possibly an essential gene, disruptants not obtained by UAU1 method	-1.0331	-0.15061	0.87931
orf19.399_RC	ORF19.399	ORF19.399	Putative serine/threonine protein kinase; possibly an essential gene, disruptants not obtained by UAU1 method	-1.07577	-0.23215	0.25291
orf19.4000	ORF19.4000	GRF10	Putative homeodomain transcription factor; null mutant is an adenine auxotroph; Spider biofilm induced; promoter bound by Bcr1, Tec1, Efg1, Ndt80 and Brg1	1.06757	0.04673	0.00556
orf19.4000_RC	ORF19.4000	GRF10	Putative homeodomain transcription factor; null mutant is an adenine auxotroph; Spider biofilm induced; promoter bound by Bcr1, Tec1, Efg1, Ndt80 and Brg1	-1.32631	-0.62817	0.03884
orf19.4002	ORF19.4002	DUN1	Protein similar to S. cerevisiae Dun1p, which is a serine-threonine protein kinase involved in DNA damage cell-cycle checkpoint; induced under Cdc5p depletion	1.1563	0.4242	0.0007
orf19.4002_RC	ORF19.4002	DUN1	Protein similar to S. cerevisiae Dun1p, which is a serine-threonine protein kinase involved in DNA damage cell-cycle checkpoint; induced under Cdc5p depletion	1.10179	0.40453	0.03897
orf19.4009	ORF19.4009	CNB1	Regulatory subunit of calcineurin B (Ca[2+]-calmodulin-regulated S/T protein phosphatase); required for wild-type resistance to fluconazole or to SDS; micafungin is fungicidal to null mutant	1.00061	-0.08377	0.67012
orf19.4009_RC	ORF19.4009	CNB1	Regulatory subunit of calcineurin B (Ca[2+]-calmodulin-regulated S/T protein phosphatase); required for wild-type resistance to fluconazole or to SDS; micafungin is fungicidal to null mutant	-1.0765	-0.23352	0.12893
orf19.4014	ORF19.4014	ORF19.4014	Planktonic growth-induced gene	-1.10151	-0.25388	0.11809
orf19.4014_RC	ORF19.4014	ORF19.4014	Planktonic growth-induced gene	-1.09257	-0.24074	0.12433
orf19.4015	ORF19.4015	CAG1	heterotrimeric G protein alpha subunit; positive role in mating pheromone response; opaque-enriched transcript; transcript repressed by MTLa1-MTLalpha2; regulated by hemoglobin-responsive Hbr1 via MTL genes; rat catheter biofilm repressed	1.58387	0.84155	0.13254
orf19.4015_RC	ORF19.4015	CAG1	heterotrimeric G protein alpha subunit; positive role in mating pheromone response; opaque-enriched transcript; transcript repressed by MTLa1-MTLalpha2; regulated by hemoglobin-responsive Hbr1 via MTL genes; rat catheter biofilm repressed	1.37834	0.56151	0.82818
orf19.403	ORF19.403	PCL2	Cyclin homolog; reduced expression observed upon depletion of Cln3; farnesol regulated; periodic mRNA expression, peak at cell-cycle G1/S phase; Hap43-induced; rat catheter biofilm repressed	-1.00703	-0.14322	0.50323
orf19.403_RC	ORF19.403	PCL2	Cyclin homolog; reduced expression observed upon depletion of Cln3; farnesol regulated; periodic mRNA expression, peak at cell-cycle G1/S phase; Hap43-induced; rat catheter biofilm repressed	1.06412	0.07632	0.10089
orf19.4056	ORF19.4056	BRG1	Transcription factor; recruits Hda1 to hypha-specific promoters; Tn mutation affects filamentation; Hap43-repressed; Spider and flow model biofilm induced; required for Spider biofilm formation; Bcr1-repressed in RPMI a/a biofilms	1.12431	0.15107	0.14721
orf19.4056_RC	ORF19.4056	BRG1	Transcription factor; recruits Hda1 to hypha-specific promoters; Tn mutation affects filamentation; Hap43-repressed; Spider and flow model biofilm induced; required for Spider biofilm formation; Bcr1-repressed in RPMI a/a biofilms	-1.40503	-0.77016	0.23578
orf19.4084	ORF19.4084	KIS1	Snf1p complex scaffold protein; similar to S. cerevisiae Gal83p and Sip2p with regions of similarity to Sip1p (ASC and KIS domain); interacts with Snf4p; mutants are hypersensitive to caspofungin and hydrogen peroxide; Hap43p-repressed gene	-1.06108	-0.38114	0.52818
orf19.4084_RC	ORF19.4084	KIS1	Snf1p complex scaffold protein; similar to S. cerevisiae Gal83p and Sip2p with regions of similarity to Sip1p (ASC and KIS domain); interacts with Snf4p; mutants are hypersensitive to caspofungin and hydrogen peroxide; Hap43p-repressed gene	-1.05939	-0.40268	0.44191
orf19.4086	ORF19.4086	ORF19.4086	Ortholog(s) have cytoplasm localization	-1.0499	-0.33211	0.20647
orf19.4086_RC	ORF19.4086	ORF19.4086	Ortholog(s) have cytoplasm localization	-1.02478	-0.16698	0.29229
orf19.410.3	ORF19.410.3	RIB4	Lumazine synthase (6,7-dimethyl-8-ribityllumazine synthase, DMRL synthase); catalyzes the penultimate step in the synthesis of riboflavin; Hap43-induced; rat catheter and Spider biofilm repressed	-1.65277	-1.29799	0.01659
orf19.410.3_RC	ORF19.410.3	RIB4	Lumazine synthase (6,7-dimethyl-8-ribityllumazine synthase, DMRL synthase); catalyzes the penultimate step in the synthesis of riboflavin; Hap43-induced; rat catheter and Spider biofilm repressed	-1.43693	-1.09276	0.013
orf19.4105	ORF19.4105	ORF19.4105	Ortholog(s) have role in DNA repair, DNA replication checkpoint, establishment of mitotic sister chromatid cohesion, maintenance of DNA repeat elements, meiotic chromosome segregation, replication fork arrest, replication fork protection	1.28358	0.85814	0.0103
orf19.4105_RC	ORF19.4105	ORF19.4105	Ortholog(s) have role in DNA repair, DNA replication checkpoint, establishment of mitotic sister chromatid cohesion, maintenance of DNA repeat elements, meiotic chromosome segregation, replication fork arrest, replication fork protection	1.32868	1.03868	0.01201
orf19.4125	ORF19.4125	PZF1	C2H2 transcription factor; Hap43-induced; rat catheter and Spider biofilm induced	-1.01631	-0.17507	0.50555
orf19.4125_RC	ORF19.4125	PZF1	C2H2 transcription factor; Hap43-induced; rat catheter and Spider biofilm induced	-1.05444	-0.65312	0.07014
orf19.4127	ORF19.4127	ORF19.4127	Ortholog(s) have actin filament binding activity, role in actin cortical patch localization, actin filament bundle assembly, endocytosis and actin cortical patch localization	-1.01715	0.03883	0.87229
orf19.4127_RC	ORF19.4127	ORF19.4127	Ortholog(s) have actin filament binding activity, role in actin cortical patch localization, actin filament bundle assembly, endocytosis and actin cortical patch localization	-1.01547	0.00132	0.59148
orf19.4145	ORF19.4145	ZCF20	Zn(II)2Cys6 transcription factor orthologous to S. cerevisiae Hap1; regulated by Sef1, Sfu1; Hap43-induced; Spider biofilm induced	2.0275	1.33907	0.00201
orf19.4145_RC	ORF19.4145	ZCF20	Zn(II)2Cys6 transcription factor orthologous to S. cerevisiae Hap1; regulated by Sef1, Sfu1; Hap43-induced; Spider biofilm induced	1.67686	0.89984	0.00067
orf19.4151	ORF19.4151	SPO1	Protein similar to phospholipase B; fungal-specific (no human or murine homolog)	-1.02416	0.02387	0.48234
orf19.4151_RC	ORF19.4151	SPO1	Protein similar to phospholipase B; fungal-specific (no human or murine homolog)	-1.0051	0.01577	0.98049
orf19.4152	ORF19.4152	CEF3	Translation elongation factor 3; antigenic in humans; predicted C-term nucleotide-binding active site; protein on surface of yeast, not hyphae; polystyrene adherence induced; higher protein amount in stationary phase; possibly essential	1.25714	0.37976	0.00743
orf19.4152_RC	ORF19.4152	CEF3	Translation elongation factor 3; antigenic in humans; predicted C-term nucleotide-binding active site; protein on surface of yeast, not hyphae; polystyrene adherence induced; higher protein amount in stationary phase; possibly essential	1.13372	0.19375	0.2493
orf19.4161	ORF19.4161	ORF19.4161	Ortholog(s) have role in DNA repair and Smc5-Smc6 complex, nucleus localization	-1.0351	-0.22416	0.84747
orf19.4161_RC	ORF19.4161	ORF19.4161	Ortholog(s) have role in DNA repair and Smc5-Smc6 complex, nucleus localization	1.00474	0.6884	0.6259
orf19.4162	ORF19.4162	MLH1	Putative mismatch repair protein; cell-cycle regulated periodic mRNA expression	1.26473	0.76728	0.03911
orf19.4162_RC	ORF19.4162	MLH1	Putative mismatch repair protein; cell-cycle regulated periodic mRNA expression	-1.02481	-0.16461	0.46912
orf19.4166	ORF19.4166	ZCF21	Predicted Zn(II)2Cys6 transcription factor; mutants display increased colonization of mouse kidneys; Spider biofilm induced	1.4427	0.65346	0.02049
orf19.4166_RC	ORF19.4166	ZCF21	Predicted Zn(II)2Cys6 transcription factor; mutants display increased colonization of mouse kidneys; Spider biofilm induced	1.52384	0.80987	0.01462
orf19.4185	ORF19.4185	ORF19.4185	Ortholog(s) have phosphoprotein phosphatase activity, thiosulfate sulfurtransferase activity, role in DNA-dependent DNA replication, protein dephosphorylation, regulation of DNA-dependent DNA replication and cytosol, nucleus localization	-1.08632	-0.25182	0.00212
orf19.4185_RC	ORF19.4185	ORF19.4185	Ortholog(s) have phosphoprotein phosphatase activity, thiosulfate sulfurtransferase activity, role in DNA-dependent DNA replication, protein dephosphorylation, regulation of DNA-dependent DNA replication and cytosol, nucleus localization	-1.32753	-0.63014	0.00282
orf19.4192	ORF19.4192	CDC14	Protein involved in exit from mitosis and morphogenesis; ortholog of S. cerevisiae Cdc14p, which is a dual-specificity phosphatase and cell-cycle regulator; suppresses S. cerevisiae cdc15-lyt1, dbf2-2, and (partially) tem1 mutant phenotypes	-1.41426	-0.78335	0.00152
orf19.4192_RC	ORF19.4192	CDC14	Protein involved in exit from mitosis and morphogenesis; ortholog of S. cerevisiae Cdc14p, which is a dual-specificity phosphatase and cell-cycle regulator; suppresses S. cerevisiae cdc15-lyt1, dbf2-2, and (partially) tem1 mutant phenotypes	-1.83063	-1.25667	0.00067
orf19.4208	ORF19.4208	RAD52	Required for homologous DNA recombination, repair of UV- or MMS-damaged DNA, telomere length, UV-induced LOH; constitutive expression, MMS-induced; weakly complements S. cerevisiae rad52 mutant; slow growth, increased white-to-opaque switch	1.10653	0.20956	0.40559
orf19.4208_RC	ORF19.4208	RAD52	Required for homologous DNA recombination, repair of UV- or MMS-damaged DNA, telomere length, UV-induced LOH; constitutive expression, MMS-induced; weakly complements S. cerevisiae rad52 mutant; slow growth, increased white-to-opaque switch	1.09635	0.24465	0.91806
orf19.4222	ORF19.4222	SST2	Predicted regulator of G-protein signaling in mating pathway; null mutation causes alpha-factor hypersensitivity and mating defect (in opaque MTLa/MTLa background); transcript induced by alpha factor	-1.04857	-0.5151	0.09011
orf19.4222_RC	ORF19.4222	SST2	Predicted regulator of G-protein signaling in mating pathway; null mutation causes alpha-factor hypersensitivity and mating defect (in opaque MTLa/MTLa background); transcript induced by alpha factor	-1.03085	-0.24846	0.3246
orf19.4225	ORF19.4225	LEU3	Zn(II)2Cys6 transcription factor; predicted regulator branched-c ofhain amino acid biosynthesis genes; alkaline induced; induced by Mnl1 under weak acid stress; required for yeast cell adherence to silicone substrate; Spider biofilm induced	-1.21616	-0.45934	0.07681
orf19.4225_RC	ORF19.4225	LEU3	Zn(II)2Cys6 transcription factor; predicted regulator branched-c ofhain amino acid biosynthesis genes; alkaline induced; induced by Mnl1 under weak acid stress; required for yeast cell adherence to silicone substrate; Spider biofilm induced	-1.25461	-0.54201	0.05593
orf19.4242	ORF19.4242	CST20	Protein kinase of Ste20p/p65PAK family, required for wild-type mating efficiency and virulence in a mouse model; Cst20p-Hst7p-Cek1p-Cph1p MAPK pathway regulates some hyphal growth; involved in Cdc42p growth regulation	2.42936	1.70016	5.876e-05
orf19.4242_RC	ORF19.4242	CST20	Protein kinase of Ste20p/p65PAK family, required for wild-type mating efficiency and virulence in a mouse model; Cst20p-Hst7p-Cek1p-Cph1p MAPK pathway regulates some hyphal growth; involved in Cdc42p growth regulation	1.55323	0.80219	0.01104
orf19.4251	ORF19.4251	ZCF22	Predicted Zn(II)2Cys6 transcription factor	-1.02217	-0.12339	0.21212
orf19.4251_RC	ORF19.4251	ZCF22	Predicted Zn(II)2Cys6 transcription factor	-1.0295	-0.11632	0.12726
orf19.4252	ORF19.4252	ORF19.4252	Ortholog(s) have protein serine/threonine kinase activity	-1.9381	-1.33927	0.0062
orf19.4252_RC	ORF19.4252	ORF19.4252	Ortholog(s) have protein serine/threonine kinase activity	-1.23139	-0.46509	0.07503
orf19.4255	ORF19.4255	ECM331	GPI-anchored protein; mainly at plasma membrane, also at cell wall; Hap43, caspofungin-induced; Plc1-regulated; Hog1, Rim101-repressed; colony morphology-related regulated by Ssn6; induced by ketoconazole and hypoxia	1.65204	0.92646	0.00777
orf19.4255_RC	ORF19.4255	ECM331	GPI-anchored protein; mainly at plasma membrane, also at cell wall; Hap43, caspofungin-induced; Plc1-regulated; Hog1, Rim101-repressed; colony morphology-related regulated by Ssn6; induced by ketoconazole and hypoxia	1.4833	0.7307	0.0286
orf19.428	ORF19.428	ORF19.428	Putative serine/threonine kinase; induced during planktonic growth; rat catheter biofilm repressed	-1.10527	-0.34657	0.06575
orf19.428_RC	ORF19.428	ORF19.428	Putative serine/threonine kinase; induced during planktonic growth; rat catheter biofilm repressed	1.05749	0.00823	0.0402
orf19.4295	ORF19.4295	ORF19.4295	Ortholog(s) have DNA binding, nucleosome binding, transcription corepressor activity	1.75414	0.99497	0.00209
orf19.4295_RC	ORF19.4295	ORF19.4295	Ortholog(s) have DNA binding, nucleosome binding, transcription corepressor activity	3.41534	2.39976	0.00096
orf19.4297	ORF19.4297	CKB2	Regulatory subunit of protein kinase CK2 (casein kinase II), beta' subunit; null mutants are hypersensitive to caspofungin	-1.00034	-0.09179	0.78519
orf19.4297_RC	ORF19.4297	CKB2	Regulatory subunit of protein kinase CK2 (casein kinase II), beta' subunit; null mutants are hypersensitive to caspofungin	1.02389	1.03902	0.32527
orf19.4308	ORF19.4308	HSL1	Probable protein kinase involved in determination of morphology during the cell cycle of both yeast-form and hyphal cells via regulation of Swe1p and Cdc28p; required for full virulence and kidney colonization in mouse systemic infection	1.72008	0.93995	0.00029
orf19.4308_RC	ORF19.4308	HSL1	Probable protein kinase involved in determination of morphology during the cell cycle of both yeast-form and hyphal cells via regulation of Swe1p and Cdc28p; required for full virulence and kidney colonization in mouse systemic infection	1.84769	1.15197	0.00264
orf19.4318	ORF19.4318	MIG1	C2H2 transcription factor; repressor; regulates genes for carbon source utilization; Tup1-dependent and independent functions; hyphal, Hap43 and caspofungin repressed; Spider and flow model biofilm induced	1.24181	0.35134	0.15374
orf19.4318_RC	ORF19.4318	MIG1	C2H2 transcription factor; repressor; regulates genes for carbon source utilization; Tup1-dependent and independent functions; hyphal, Hap43 and caspofungin repressed; Spider and flow model biofilm induced	1.01248	-0.06857	0.30904
orf19.4361	ORF19.4361	IFF3	Putative GPI-anchored protein	2.41017	1.82911	0.01351
orf19.4361_RC	ORF19.4361	IFF3	Putative GPI-anchored protein	2.03308	1.42989	0.02088
orf19.4367	ORF19.4367	SMC1	Protein similar to chromosomal ATPases; RNA abundance regulated by tyrosol and cell density; cell-cycle regulated periodic mRNA expression	1.44771	1.05775	0.01398
orf19.4367_RC	ORF19.4367	SMC1	Protein similar to chromosomal ATPases; RNA abundance regulated by tyrosol and cell density; cell-cycle regulated periodic mRNA expression	1.14001	0.44536	0.10633
orf19.4377	ORF19.4377	KRE1	Cell wall glycoprotein; beta glucan synthesis; increases glucan content in S. cerevisiae kre1, complements killer toxin sensitivity; caspofungin induced; Spider/rat catheter/flow model biofilm induced; Bcr1-repressed in RPMI a/a biofilms	1.21808	0.31247	0.01678
orf19.4377_RC	ORF19.4377	KRE1	Cell wall glycoprotein; beta glucan synthesis; increases glucan content in S. cerevisiae kre1, complements killer toxin sensitivity; caspofungin induced; Spider/rat catheter/flow model biofilm induced; Bcr1-repressed in RPMI a/a biofilms	1.66153	0.87641	0.00429
orf19.4401	ORF19.4401	YVH1	Putative dual specificity phosphatase (phosphoserine/threonine and phosphotyrosine phosphatase); required for wild-type growth rate and for wild-type virulence in mouse model of systemic infection; Hap43p-induced gene	-1.34712	-0.86281	0.00017
orf19.4401_RC	ORF19.4401	YVH1	Putative dual specificity phosphatase (phosphoserine/threonine and phosphotyrosine phosphatase); required for wild-type growth rate and for wild-type virulence in mouse model of systemic infection; Hap43p-induced gene	-1.02817	-0.18447	0.19667
orf19.4427	ORF19.4427	SKP1	Putative subunit D of kinetochore protein complex CBF3; regulated by Gcn4p; repressed in response to amino acid starvation (3-aminotriazole treatment)	-2.51501	-1.83801	0.00563
orf19.4427_RC	ORF19.4427	SKP1	Putative subunit D of kinetochore protein complex CBF3; regulated by Gcn4p; repressed in response to amino acid starvation (3-aminotriazole treatment)	-1.65229	-1.04172	0.02736
orf19.4432	ORF19.4432	KSP1	Putative serine/threonine protein kinase; mRNA binds She3 and is localized to hyphal tips; mutation confers hypersensitivity to amphotericin B	1.82547	1.08454	0.02807
orf19.4432_RC	ORF19.4432	KSP1	Putative serine/threonine protein kinase; mRNA binds She3 and is localized to hyphal tips; mutation confers hypersensitivity to amphotericin B	1.89285	1.24858	0.01523
orf19.4433	ORF19.4433	CPH1	Transcription factor; for mating, filamentation on solid media, pheromone-stimulated biofilms; in pathway with Ess1, Czf1; required with Efg1 for host cytokine response; regulates galactose metabolism genes; rat cathether biofilm repressed	1.00823	0.76893	0.46676
orf19.4433_RC	ORF19.4433	CPH1	Transcription factor; for mating, filamentation on solid media, pheromone-stimulated biofilms; in pathway with Ess1, Czf1; required with Efg1 for host cytokine response; regulates galactose metabolism genes; rat cathether biofilm repressed	1.01487	0.52847	0.40797
orf19.4438	ORF19.4438	RME1	Zinc finger protein; controls meiosis in S. cerevisae; white-specific transcript; upregulation correlates with clinical development of fluconazole resistance; Upc2-regulated in hypoxia; flow model biofilm induced; Spider biofilm repressed	-1.00077	0.56067	0.55719
orf19.4438_RC	ORF19.4438	RME1	Zinc finger protein; controls meiosis in S. cerevisae; white-specific transcript; upregulation correlates with clinical development of fluconazole resistance; Upc2-regulated in hypoxia; flow model biofilm induced; Spider biofilm repressed	1.01758	0.01909	0.41928
orf19.4450	ORF19.4450	ZCF23	Predicted Zn(II)2Cys6 transcription factor; ortholog of S. cerevisiae Gsm1; flow model biofilm induced	-1.90542	-1.3342	0.00146
orf19.4450_RC	ORF19.4450	ZCF23	Predicted Zn(II)2Cys6 transcription factor; ortholog of S. cerevisiae Gsm1; flow model biofilm induced	-1.6468	-1.03929	0.00523
orf19.4518	ORF19.4518	ORF19.4518	Protein kinase of unknown function; mutants are viable	2.6696	2.83441	0.00491
orf19.4518_RC	ORF19.4518	ORF19.4518	Protein kinase of unknown function; mutants are viable	3.52171	3.50871	0.00486
orf19.4534	ORF19.4534	ORF19.4534	Putative UBX-domain (ubiquitin-regulatory domain) protein; macrophage-downregulated gene	-1.33771	-0.74499	0.01345
orf19.4534_RC	ORF19.4534	ORF19.4534	Putative UBX-domain (ubiquitin-regulatory domain) protein; macrophage-downregulated gene	-1.21838	-0.50022	0.06708
orf19.4537	ORF19.4537	ORF19.4537	Ortholog(s) have RNA polymerase II core binding, RNA polymerase II regulatory region DNA binding, core RNA polymerase II recruiting transcription factor activity	1.57759	1.3613	0.0018
orf19.4537_RC	ORF19.4537	ORF19.4537	Ortholog(s) have RNA polymerase II core binding, RNA polymerase II regulatory region DNA binding, core RNA polymerase II recruiting transcription factor activity	1.29378	0.82604	0.01089
orf19.454	ORF19.454	SFL1	Transcription factor; involved in negative regulation of flocculation and filamentous growth; induced in core caspofungin response; Spider biofilm induced	-1.04115	-0.16624	0.28416
orf19.454_RC	ORF19.454	SFL1	Transcription factor; involved in negative regulation of flocculation and filamentous growth; induced in core caspofungin response; Spider biofilm induced	-1.48864	-0.88662	0.00348
orf19.4549	ORF19.4549	FGR38	Protein lacking an ortholog in S. cerevisiae; member of a family of related proteins; transposon mutation affects filamentous growth; macrophage-induced gene; Hap43p-repressed gene	1.01027	0.00633	0.22781
orf19.4549_RC	ORF19.4549	FGR38	Protein lacking an ortholog in S. cerevisiae; member of a family of related proteins; transposon mutation affects filamentous growth; macrophage-induced gene; Hap43p-repressed gene	1.76666	1.53449	0.00223
orf19.4560	ORF19.4560	BFR1	Protein involved in the maintenance of normal ploidy; S. cerevisiae ortholog cofers Brefeldin A resistance; stationary phase enriched protein; Spider biofilm repressed	-1.05256	-0.44991	0.13196
orf19.4560_RC	ORF19.4560	BFR1	Protein involved in the maintenance of normal ploidy; S. cerevisiae ortholog cofers Brefeldin A resistance; stationary phase enriched protein; Spider biofilm repressed	-1.03157	-0.14368	0.09205
orf19.4568	ORF19.4568	ZCF25	Putative Zn(II)2Cys6 transcription factor	1.56315	0.81502	0.03603
orf19.4568_RC	ORF19.4568	ZCF25	Putative Zn(II)2Cys6 transcription factor	1.33361	0.49504	0.06615
orf19.4593	ORF19.4593	RGA2	Putative GTPase-activating protein (GAP) for Rho-type GTPase Cdc42; involved in cell signaling pathways controlling cell polarity; induced by low-level peroxide stress; flow model biofilm induced	1.88439	1.19159	0.00201
orf19.4593_RC	ORF19.4593	RGA2	Putative GTPase-activating protein (GAP) for Rho-type GTPase Cdc42; involved in cell signaling pathways controlling cell polarity; induced by low-level peroxide stress; flow model biofilm induced	1.78396	1.08125	0.00227
orf19.460	ORF19.460	CEK2	MAP kinase required for wild-type efficiency of mating; component of the signal transduction pathway that regulates mating; ortholog of S. cerevisiae Fus3; induced by Cph1, pheromone; transposon mutation affects filamentous growth	-1.04044	-0.29409	0.89703
orf19.460_RC	ORF19.460	CEK2	MAP kinase required for wild-type efficiency of mating; component of the signal transduction pathway that regulates mating; ortholog of S. cerevisiae Fus3; induced by Cph1, pheromone; transposon mutation affects filamentous growth	1.00363	0.66282	0.88121
orf19.4623.3	ORF19.4623.3	NHP6A	Putative non-histone chromatin component; RNA abundance regulated by tyrosol,cell density; Hap43-induced; amphotericin B, caspofungin repressed; 5'-UTR intron; rat catheter and Spider biofilm repressed	-1.56548	-1.1425	0.00186
orf19.4623.3_RC	ORF19.4623.3	NHP6A	Putative non-histone chromatin component; RNA abundance regulated by tyrosol,cell density; Hap43-induced; amphotericin B, caspofungin repressed; 5'-UTR intron; rat catheter and Spider biofilm repressed	-1.10286	-0.34344	0.01856
orf19.4645	ORF19.4645	BEM1	Protein required for wild-type budding, hyphal growth, and virulence in a mouse systemic infection; suppresses pseudohyphal and filamentous growth defects of various S. cerevisiae mutants and heat sensitivity of S. cerevisiae cdc24-4 mutant	-1.01438	-0.11377	0.37226
orf19.4645_RC	ORF19.4645	BEM1	Protein required for wild-type budding, hyphal growth, and virulence in a mouse systemic infection; suppresses pseudohyphal and filamentous growth defects of various S. cerevisiae mutants and heat sensitivity of S. cerevisiae cdc24-4 mutant	1.05777	0.00355	0.55923
orf19.4649	ORF19.4649	ZCF27	Putative Zn(II)2Cys6 transcription factor	-1.25123	-0.53657	0.19137
orf19.4649_RC	ORF19.4649	ZCF27	Putative Zn(II)2Cys6 transcription factor	1.02641	-0.03247	0.77535
orf19.4651	ORF19.4651	PGA53	GPI-anchored cell surface protein of unknown function; greater mRNA abundance observed in a cyr1 homozygous null mutant than in wild type	-1.0693	-0.21878	0.56026
orf19.4651_RC	ORF19.4651	PGA53	GPI-anchored cell surface protein of unknown function; greater mRNA abundance observed in a cyr1 homozygous null mutant than in wild type	-1.00662	-0.10533	0.60874
orf19.4662	ORF19.4662	RLM1	Putative transcription factor; required for wild-type resistance to cell wall perturbation, caspofungin treatment; regulates caspofungin induction of PGA13	-1.24879	-0.72506	0.00032
orf19.4662_RC	ORF19.4662	RLM1	Putative transcription factor; required for wild-type resistance to cell wall perturbation, caspofungin treatment; regulates caspofungin induction of PGA13	-1.05473	-0.24917	0.04185
orf19.4670	ORF19.4670	CAS5	Transcription factor; cell wall damage response; required for adherence, response/resistance to caspofungin; repressed in core stress response; mutants have reduced CFU in mice, hyphal defect in C. elegans infection; Spider biofilm induced	-1.16455	-0.41198	0.08921
orf19.4670_RC	ORF19.4670	CAS5	Transcription factor; cell wall damage response; required for adherence, response/resistance to caspofungin; repressed in core stress response; mutants have reduced CFU in mice, hyphal defect in C. elegans infection; Spider biofilm induced	-1.08154	-0.20416	0.27271
orf19.4689	ORF19.4689	PGA57	Putative GPI-anchored protein; Hap43p-induced gene	-1.50606	-0.86468	0.06372
orf19.4689_RC	ORF19.4689	PGA57	Putative GPI-anchored protein; Hap43p-induced gene	-1.2183	-0.47274	0.46669
orf19.4722	ORF19.4722	ORF19.4722	Ortholog(s) have sequence-specific DNA binding RNA polymerase II transcription factor activity	-1.24578	-0.5134	0.01319
orf19.4722_RC	ORF19.4722	ORF19.4722	Ortholog(s) have sequence-specific DNA binding RNA polymerase II transcription factor activity	-1.21084	-0.49164	0.06486
orf19.4725	ORF19.4725	SWI6	Putative component of the MBF and SBF transcription complexes involved in G1/S cell-cycle progression; periodic mRNA expression, peak at cell-cycle G1/S phase	-1.09624	-0.27109	0.01983
orf19.4725_RC	ORF19.4725	SWI6	Putative component of the MBF and SBF transcription complexes involved in G1/S cell-cycle progression; periodic mRNA expression, peak at cell-cycle G1/S phase	-1.07512	-0.20609	0.53318
orf19.4752	ORF19.4752	MSN4	Zinc finger transcription factor; similar to S. cerevisiae Msn4, but not a significant stress response regulator in C. albicans; partly complements STRE-activation defect of S. cerevisiae msn2 msn4 double mutant; flow model biofilm induced	-2.15496	-1.54485	0.00091
orf19.4752_RC	ORF19.4752	MSN4	Zinc finger transcription factor; similar to S. cerevisiae Msn4, but not a significant stress response regulator in C. albicans; partly complements STRE-activation defect of S. cerevisiae msn2 msn4 double mutant; flow model biofilm induced	-1.32967	-0.66397	0.00023
orf19.4765	ORF19.4765	PGA6	GPI-anchored cell wall adhesin-like protein; induced by high iron; upregulated upon Als2 depletion; mRNA binds She3 and is localized to hyphal tips; Spider biofilm repressed	1.27096	0.39809	0.00374
orf19.4765_RC	ORF19.4765	PGA6	GPI-anchored cell wall adhesin-like protein; induced by high iron; upregulated upon Als2 depletion; mRNA binds She3 and is localized to hyphal tips; Spider biofilm repressed	1.12324	0.14916	0.17014
orf19.4766	ORF19.4766	ARG81	Zn(II)2Cys6 transcription factor; required for utilization of ornithine as a nitrogen source and for wild-type resistance to caffeine; required for yeast cell adherence to silicone substrate	-1.0532	-0.18541	0.74542
orf19.4766_RC	ORF19.4766	ARG81	Zn(II)2Cys6 transcription factor; required for utilization of ornithine as a nitrogen source and for wild-type resistance to caffeine; required for yeast cell adherence to silicone substrate	1.351	0.52115	0.02669
orf19.4767	ORF19.4767	ZCF28	Zn(II)2Cys6 transcription factor; required for yeast cell adherence to silicone substrate; Spider biofilm induced	-2.05967	-1.54079	0.00104
orf19.4767_RC	ORF19.4767	ZCF28	Zn(II)2Cys6 transcription factor; required for yeast cell adherence to silicone substrate; Spider biofilm induced	-1.42141	-0.75708	0.00593
orf19.4775	ORF19.4775	CTA8	Essential transcription factor, mediates heat shock transcriptional induction; in the absence of heat stress, Cta8p levels are modulated by growth temperature to regulate basal expression of genes involved in protein folding	-2.13986	-1.56843	0.00213
orf19.4775_RC	ORF19.4775	CTA8	Essential transcription factor, mediates heat shock transcriptional induction; in the absence of heat stress, Cta8p levels are modulated by growth temperature to regulate basal expression of genes involved in protein folding	-1.406	-0.77252	0.00788
orf19.4776	ORF19.4776	LYS143	Zn(II)2Cys6 transcription factor; ortholog of S. cerevisiae Lys14 involved in the regulation of lysine biosynthesis genes	1.03069	-0.02409	0.9507
orf19.4776_RC	ORF19.4776	LYS143	Zn(II)2Cys6 transcription factor; ortholog of S. cerevisiae Lys14 involved in the regulation of lysine biosynthesis genes	-1.16458	-0.35069	0.35722
orf19.4778	ORF19.4778	LYS142	Zn(II)2Cys6 transcription factor; has similarity to S. cerevisiae Lys14, involved in the regulation of lysine biosynthesis genes; fungal-specific	-1.01954	0.12894	0.95303
orf19.4778_RC	ORF19.4778	LYS142	Zn(II)2Cys6 transcription factor; has similarity to S. cerevisiae Lys14, involved in the regulation of lysine biosynthesis genes; fungal-specific	1.03275	1.32718	0.31117
orf19.4785	ORF19.4785	PTC1	Putative protein phosphatase of the Type 2C-related family (serine/threonine-specific), similar to S. cerevisiae Ptc1p; mutant shows virulence defect	-1.25304	-0.48765	0.00247
orf19.4785_RC	ORF19.4785	PTC1	Putative protein phosphatase of the Type 2C-related family (serine/threonine-specific), similar to S. cerevisiae Ptc1p; mutant shows virulence defect	1.12603	0.14374	0.05451
orf19.4796	ORF19.4796	ORF19.4796	Putative eIF-4E-binding repressor of CAP-dependent translation; stationary phase enriched protein	-2.25811	-1.78441	0.00073
orf19.4796_RC	ORF19.4796	ORF19.4796	Putative eIF-4E-binding repressor of CAP-dependent translation; stationary phase enriched protein	-1.602	-1.13669	0.00143
orf19.4799	ORF19.4799	CEF1	Putative mRNA splicing factor; ortholog is essential in S. cerevisiae; Spider biofilm induced	-1.26929	-0.58648	0.0052
orf19.4799_RC	ORF19.4799	CEF1	Putative mRNA splicing factor; ortholog is essential in S. cerevisiae; Spider biofilm induced	-1.04145	-0.21063	0.38051
orf19.4853	ORF19.4853	HCM1	Protein with forkhead domain; similar to S. cerevisiae Hcm1p; Hap43p-induced gene	-2.04059	-1.45678	0.002
orf19.4853_RC	ORF19.4853	HCM1	Protein with forkhead domain; similar to S. cerevisiae Hcm1p; Hap43p-induced gene	-1.71666	-1.11257	0.00221
orf19.4866	ORF19.4866	CPP1	VH1 family MAPK phosphatase; regulates Cst20-Hst7-Cek1-Cph1 filamentation pathway; represses yeast-hyphal switch; required for virulence in mice; yeast-enriched; induced by alpha pheromone in SpiderM medium; Spider biofilm induced	-1.33655	-0.66947	7.81817e-05
orf19.4866_RC	ORF19.4866	CPP1	VH1 family MAPK phosphatase; regulates Cst20-Hst7-Cek1-Cph1 filamentation pathway; represses yeast-hyphal switch; required for virulence in mice; yeast-enriched; induced by alpha pheromone in SpiderM medium; Spider biofilm induced	-1.59913	-0.97901	0.00082
orf19.4867	ORF19.4867	SWE1	Putative protein kinase with a role in control of growth and morphogenesis, required for full virulence; mutant cells are small, rounded, and sometimes binucleate; not required for filamentous growth; mutant is hypersensitive to caspofungin	1.37102	1.01332	0.04444
orf19.4867_RC	ORF19.4867	SWE1	Putative protein kinase with a role in control of growth and morphogenesis, required for full virulence; mutant cells are small, rounded, and sometimes binucleate; not required for filamentous growth; mutant is hypersensitive to caspofungin	1.38263	1.04429	0.02398
orf19.4869	ORF19.4869	SFU1	GATA-type transcription factor; regulator of iron-responsive genes; represses iron utilization genes if iron is present; Hap43-repressed; promotes gastrointestinal commensalism in mice; Spider biofilm induced	-1.29603	-0.56196	0.01178
orf19.4869_RC	ORF19.4869	SFU1	GATA-type transcription factor; regulator of iron-responsive genes; represses iron utilization genes if iron is present; Hap43-repressed; promotes gastrointestinal commensalism in mice; Spider biofilm induced	-1.31903	-0.62428	0.04153
orf19.487	ORF19.487	SPT14	Putative DNA-binding transcription factor; predicted role in regulation of biogenesis of the cell wall; upregulated in biofilm; protein newly produced during adaptation to the serum	1.42328	0.62615	0.00386
orf19.487_RC	ORF19.487	SPT14	Putative DNA-binding transcription factor; predicted role in regulation of biogenesis of the cell wall; upregulated in biofilm; protein newly produced during adaptation to the serum	1.31747	0.45407	0.02045
orf19.4890	ORF19.4890	CLA4	Ste20p family Ser/Thr kinase required for wild-type filamentous growth, organ colonization and virulence in mouse systemic infection; role in chlamydospore formation; functional homolog of S. cerevisiae Cla4p; mutant caspofungin sensitive	-1.066	-0.90646	0.58927
orf19.4890_RC	ORF19.4890	CLA4	Ste20p family Ser/Thr kinase required for wild-type filamentous growth, organ colonization and virulence in mouse systemic infection; role in chlamydospore formation; functional homolog of S. cerevisiae Cla4p; mutant caspofungin sensitive	-1.00811	0.3909	0.7791
orf19.4909	ORF19.4909	CBK1	Ser/Thr kinase of cell wall integrity pathway; mutants show abnormal morphology and aggregation; Mob2p associated; required for wild-type hyphal growth and transcriptional regulation of cell-wall-associated genes	1.4694	0.72979	0.02393
orf19.4909_RC	ORF19.4909	CBK1	Ser/Thr kinase of cell wall integrity pathway; mutants show abnormal morphology and aggregation; Mob2p associated; required for wild-type hyphal growth and transcriptional regulation of cell-wall-associated genes	1.46838	0.72944	0.00487
orf19.4910	ORF19.4910	FGR41	Putative GPI-anchored adhesin-like protein; transposon mutation affects filamentous growth; Spider biofilm repressed	1.36286	0.57503	0.05259
orf19.4910_RC	ORF19.4910	FGR41	Putative GPI-anchored adhesin-like protein; transposon mutation affects filamentous growth; Spider biofilm repressed	1.38905	0.62349	0.07069
orf19.4941	ORF19.4941	TYE7	bHLH transcription factor; control of glycolysis; required for biofilm formation; hyphally regulated by Cph1, Cyr1; flucytosine, Hog1 induced; amphotericin B, caspofungin repressed; induced in flow model biofilm and planktonic cultures	-1.34978	-0.68236	3.40534e-06
orf19.4941_RC	ORF19.4941	TYE7	bHLH transcription factor; control of glycolysis; required for biofilm formation; hyphally regulated by Cph1, Cyr1; flucytosine, Hog1 induced; amphotericin B, caspofungin repressed; induced in flow model biofilm and planktonic cultures	-1.22133	-0.43972	0.00076
orf19.4969	ORF19.4969	KEM1	5'->3' exoribonuclease of cytoplasmic stress granules; role in filamentous growth; complements slow growth/mating of S. cerevisiae kem1 mutant; required for SD or Spider medium biofilm formation	1.96	1.27085	0.00407
orf19.4969_RC	ORF19.4969	KEM1	5'->3' exoribonuclease of cytoplasmic stress granules; role in filamentous growth; complements slow growth/mating of S. cerevisiae kem1 mutant; required for SD or Spider medium biofilm formation	1.97726	1.23976	0.02176
orf19.4979	ORF19.4979	KNS1	Protein kinase involved in negative regulation of PolIII transcription; effector kinase of the TOR signaling pathway, phosphorylates Rpc53p to regulate ribosome and tRNA biosynthesis; Spider and flow model biofilm induced	-1.21664	-0.5397	0.02394
orf19.4979_RC	ORF19.4979	KNS1	Protein kinase involved in negative regulation of PolIII transcription; effector kinase of the TOR signaling pathway, phosphorylates Rpc53p to regulate ribosome and tRNA biosynthesis; Spider and flow model biofilm induced	-1.05159	-0.21974	0.1586
orf19.5008	ORF19.5008	ORF19.5008	Removed from CGD	-1.02405	0.02639	0.87872
orf19.5008_RC	ORF19.5008	ORF19.5008	Removed from CGD	-1.01571	0.21651	0.40688
orf19.5026	ORF19.5026	ORF19.5026	C2H2 transcription factor; Spider biofilm induced	1.83088	1.13355	0.02892
orf19.5026_RC	ORF19.5026	ORF19.5026	C2H2 transcription factor; Spider biofilm induced	1.40951	0.60656	0.03141
orf19.5031	ORF19.5031	SSK1	Response regulator of two-component system; role in oxidative stress response, cell wall biosynthesis, virulence, hyphal growth on solid media; expressed in hyphae and yeast; peroxisomal targeting sequence (PTS1); Spider biofilm induced	1.07289	0.05676	0.11408
orf19.5031_RC	ORF19.5031	SSK1	Response regulator of two-component system; role in oxidative stress response, cell wall biosynthesis, virulence, hyphal growth on solid media; expressed in hyphae and yeast; peroxisomal targeting sequence (PTS1); Spider biofilm induced	1.02244	-0.05641	0.37618
orf19.5032	ORF19.5032	SIM1	Adhesin-like protein; involved in cell wall maintenance, redundant with Sun41; possibly secreted; macrophage-repressed; repressed by Rim101, Cyr1, Ras1; Spider biofilm induced	1.22453	0.3232	0.01353
orf19.5032_RC	ORF19.5032	SIM1	Adhesin-like protein; involved in cell wall maintenance, redundant with Sun41; possibly secreted; macrophage-repressed; repressed by Rim101, Cyr1, Ras1; Spider biofilm induced	1.49032	0.83438	0.00409
orf19.5045	ORF19.5045	PTP2	Predicted protein tyrosine phosphatase; involved in regulation of MAP kinase Hog1 activity; induced by Mnl1 under weak acid stress; rat catheter and Spider biofilm induced	-1.5071	-0.85051	0.00402
orf19.5045_RC	ORF19.5045	PTP2	Predicted protein tyrosine phosphatase; involved in regulation of MAP kinase Hog1 activity; induced by Mnl1 under weak acid stress; rat catheter and Spider biofilm induced	-1.37231	-0.69261	0.00186
orf19.505	ORF19.505	SRV2	Adenylate cyclase-associated protein; regulates adenylate cyclase activity; required for wild-type germ tube formation and for virulence in mice; mutant defects in filamentous growth are rescued by cAMP or dbcAMP; Spider biofilm repressed	1.16615	0.31706	0.09944
orf19.505_RC	ORF19.505	SRV2	Adenylate cyclase-associated protein; regulates adenylate cyclase activity; required for wild-type germ tube formation and for virulence in mice; mutant defects in filamentous growth are rescued by cAMP or dbcAMP; Spider biofilm repressed	1.11301	0.19693	0.0455
orf19.5102	ORF19.5102	PLB5	Putative GPI-linked phospholipase B, fungal-specific (no mammalian homolog); null mutation eliminates cell-associated phospholipase A2 activity and attenuates virulence; fluconazole-repressed; flow model biofilm repressed	2.04753	1.2715	0.00211
orf19.5102_RC	ORF19.5102	PLB5	Putative GPI-linked phospholipase B, fungal-specific (no mammalian homolog); null mutation eliminates cell-associated phospholipase A2 activity and attenuates virulence; fluconazole-repressed; flow model biofilm repressed	2.60411	1.8849	0.00294
orf19.5104	ORF19.5104	LTP1	Putative protein phosphatase of the PTP family (tyrosine-specific), similar to S. cerevisiae Ltp1p	-1.80971	-1.28012	0.00298
orf19.5104_RC	ORF19.5104	LTP1	Putative protein phosphatase of the PTP family (tyrosine-specific), similar to S. cerevisiae Ltp1p	-1.71339	-1.16992	0.00233
orf19.513	ORF19.513	ORF19.513	Protein with a DNA-binding domain, similar to S. cerevisiae meiosis-specific transcription factor Ndt80p	1.10449	0.29957	0.01787
orf19.513_RC	ORF19.513	ORF19.513	Protein with a DNA-binding domain, similar to S. cerevisiae meiosis-specific transcription factor Ndt80p	1.1572	0.48458	0.02017
orf19.5144	ORF19.5144	PGA28	Protein similar to S. cerevisiae Wsc2p, which has roles in stress- and cell-wall-related processes; predicted Kex2p substrate; putative GPI-anchored adhesin-like protein	1.98565	1.1993	0.01067
orf19.5144_RC	ORF19.5144	PGA28	Protein similar to S. cerevisiae Wsc2p, which has roles in stress- and cell-wall-related processes; predicted Kex2p substrate; putative GPI-anchored adhesin-like protein	2.29793	1.59786	0.00953
orf19.5148	ORF19.5148	CYR1	Class III adenylyl cyclase; mutant lacks cAMP; mutant hyphal growth defect rescued by exogenous cAMP; required for mouse mucosal or systemic infection; role in macrophage sensitivity, apoptosis; downstream of Ras1p and CO2 signaling	2.03559	1.3471	0.00655
orf19.5148_RC	ORF19.5148	CYR1	Class III adenylyl cyclase; mutant lacks cAMP; mutant hyphal growth defect rescued by exogenous cAMP; required for mouse mucosal or systemic infection; role in macrophage sensitivity, apoptosis; downstream of Ras1p and CO2 signaling	1.93822	1.24835	0.01855
orf19.5156	ORF19.5156	ORF19.5156	Protein similar to S. cerevisiae Phs1p, which is required for growth; has six putative membrane-spanning regions	-2.10122	-1.58103	0.00085
orf19.5156_RC	ORF19.5156	ORF19.5156	Protein similar to S. cerevisiae Phs1p, which is required for growth; has six putative membrane-spanning regions	-1.70229	-1.11226	0.00102
orf19.5157	ORF19.5157	ORF19.5157	Protein with a protein tyrosine phosphatase-like protein domain; putative membrane-spanning regions; rat catheter biofilm induced	-2.02078	-1.45281	0.04923
orf19.5157_RC	ORF19.5157	ORF19.5157	Protein with a protein tyrosine phosphatase-like protein domain; putative membrane-spanning regions; rat catheter biofilm induced	-1.7345	-1.15179	0.06417
orf19.5160	ORF19.5160	ORF19.5160	Ortholog(s) have role in G1/S transition of mitotic cell cycle, TOR signaling cascade, dephosphorylation, regulation of mitotic sister chromatid segregation, tRNA wobble uridine modification	-1.05744	-0.19753	0.68435
orf19.5160_RC	ORF19.5160	ORF19.5160	Ortholog(s) have role in G1/S transition of mitotic cell cycle, TOR signaling cascade, dephosphorylation, regulation of mitotic sister chromatid segregation, tRNA wobble uridine modification	-1.15852	-0.33308	0.00567
orf19.5175	ORF19.5175	ORF19.5175	Ortholog(s) have ubiquitin-protein ligase activity, role in ER-associated protein catabolic process and Doa10p ubiquitin ligase complex, integral to endoplasmic reticulum membrane, nuclear inner membrane localization	1.2298	0.33177	0.02349
orf19.5175_RC	ORF19.5175	ORF19.5175	Ortholog(s) have ubiquitin-protein ligase activity, role in ER-associated protein catabolic process and Doa10p ubiquitin ligase complex, integral to endoplasmic reticulum membrane, nuclear inner membrane localization	1.10078	0.0903	0.14014
orf19.5184	ORF19.5184	ORF19.5184	Putative Ran guanyl-nucleotide exchange factor; probable signal transducer; Spider biofilm repressed	-1.46083	-1.06715	0.0003
orf19.5184_RC	ORF19.5184	ORF19.5184	Putative Ran guanyl-nucleotide exchange factor; probable signal transducer; Spider biofilm repressed	-1.49827	-1.343	0.00022
orf19.5188	ORF19.5188	CHS1	Chitin synthase; essential; for primary septum synthesis in yeast and hyphae; 1 of several chitin synthases; enzymatically activated by proteolytic processing; complements defects of S. cerevisiae chs1 or chs2; Spider biofilm repressed	1.99271	1.3042	0.00249
orf19.5188_RC	ORF19.5188	CHS1	Chitin synthase; essential; for primary septum synthesis in yeast and hyphae; 1 of several chitin synthases; enzymatically activated by proteolytic processing; complements defects of S. cerevisiae chs1 or chs2; Spider biofilm repressed	1.51236	0.69406	0.01611
orf19.5200	ORF19.5200	SIT4	Serine/threonine protein phosphatase catalytic subunit; has a role in cell wall maintenance, hyphal growth, and virulence in a mouse systemic infection model	-1.22497	-0.61155	0.00741
orf19.5200_RC	ORF19.5200	SIT4	Serine/threonine protein phosphatase catalytic subunit; has a role in cell wall maintenance, hyphal growth, and virulence in a mouse systemic infection model	-1.2817	-0.78581	0.00015
orf19.5219	ORF19.5219	IRA2	GTPase-activating protein; negatively regulates RAS by converting it from the GTP- to the GDP-bound inactive form; Spider biofilm induced; flow model biofilm repressed	1.3938	1.11496	0.00267
orf19.5219_RC	ORF19.5219	IRA2	GTPase-activating protein; negatively regulates RAS by converting it from the GTP- to the GDP-bound inactive form; Spider biofilm induced; flow model biofilm repressed	1.34629	0.94981	0.00644
orf19.5224	ORF19.5224	ORF19.5224	Putative serine/threonine protein kinase; predicted role in sphingolipid-mediated signaling pathway that controls endocytosis; mRNA binds She3 and is localized to hyphal tips	1.73605	0.98031	0.00531
orf19.5224_RC	ORF19.5224	ORF19.5224	Putative serine/threonine protein kinase; predicted role in sphingolipid-mediated signaling pathway that controls endocytosis; mRNA binds She3 and is localized to hyphal tips	1.57467	0.82982	0.02142
orf19.5241	ORF19.5241	SNT1	Ortholog of S. cerevisiae Snt1; an NAD-independent histone deacetylase; heterozygous transposon mutation affects filamentous growth; null mutants are viable	1.86861	1.17465	0.00113
orf19.5241_RC	ORF19.5241	SNT1	Ortholog of S. cerevisiae Snt1; an NAD-independent histone deacetylase; heterozygous transposon mutation affects filamentous growth; null mutants are viable	1.85642	1.1532	0.0082
orf19.5247	ORF19.5247	ORF19.5247	Ortholog(s) have cytoplasm localization	1.03521	-0.01527	0.25603
orf19.5247_RC	ORF19.5247	ORF19.5247	Ortholog(s) have cytoplasm localization	-1.27211	-0.51999	0.01092
orf19.5257	ORF19.5257	LCB4	Putative sphingosine kinase; Tac1p-regulated expression; rat catheter biofilm induced	-1.11932	-0.31211	0.0048
orf19.5257_RC	ORF19.5257	LCB4	Putative sphingosine kinase; Tac1p-regulated expression; rat catheter biofilm induced	-1.20168	-0.41054	0.0129
orf19.5265	ORF19.5265	KIP4	S. cerevisiae Smy1 ortholog; Tn mutation affects filamentous growth; filament induced; has Mob2-dependent hyphal regulation; regulated by Nrg1, Tup1; oralpharyngeal candidasis induced; Spider biofilm induced; flow model biofilm repressed	1.29901	1.14793	0.00806
orf19.5265_RC	ORF19.5265	KIP4	S. cerevisiae Smy1 ortholog; Tn mutation affects filamentous growth; filament induced; has Mob2-dependent hyphal regulation; regulated by Nrg1, Tup1; oralpharyngeal candidasis induced; Spider biofilm induced; flow model biofilm repressed	1.11229	2.85394	0.04093
orf19.5276	ORF19.5276	ORF19.5276	Putative nuclear pore-associated protein; Hap43p-induced gene; induced upon low-level peroxide stress; possibly an essential gene, disruptants not obtained by UAU1 method	1.83324	1.64818	0.00341
orf19.5276_RC	ORF19.5276	ORF19.5276	Putative nuclear pore-associated protein; Hap43p-induced gene; induced upon low-level peroxide stress; possibly an essential gene, disruptants not obtained by UAU1 method	1.56527	1.22948	0.01003
orf19.5303	ORF19.5303	PGA30	GPI-anchored protein of cell wall	-1.17541	-0.39958	0.10742
orf19.5303_RC	ORF19.5303	PGA30	GPI-anchored protein of cell wall	-1.0845	-0.23199	0.45934
orf19.5305	ORF19.5305	RHD3	GPI-anchored yeast-associated cell wall protein; induced in high iron; clade-associated gene expression; not essential for cell wall integrity; fluconazole-repressed; flow model and Spider biofilm repressed	1.94752	1.29138	0.00159
orf19.5305_RC	ORF19.5305	RHD3	GPI-anchored yeast-associated cell wall protein; induced in high iron; clade-associated gene expression; not essential for cell wall integrity; fluconazole-repressed; flow model and Spider biofilm repressed	1.10365	0.09968	0.14658
orf19.532	ORF19.532	RBR2	Cell wall protein; expression repressed by Rim101; transcript regulated upon white-opaque switching; repressed by alpha pheromone in SpiderM medium; macrophage-induced gene	-1.06241	-0.30533	0.60938
orf19.532_RC	ORF19.532	RBR2	Cell wall protein; expression repressed by Rim101; transcript regulated upon white-opaque switching; repressed by alpha pheromone in SpiderM medium; macrophage-induced gene	-1.0261	-0.15515	0.83704
orf19.5326	ORF19.5326	ORF19.5326	Putative transcription factor with zinc finger DNA-binding motif; possible ortholog of S. cerevisiae Mig2p	-1.89483	-1.31162	0.00058
orf19.5326_RC	ORF19.5326	ORF19.5326	Putative transcription factor with zinc finger DNA-binding motif; possible ortholog of S. cerevisiae Mig2p	-2.05443	-1.47665	0.00062
orf19.5334	ORF19.5334	ORF19.5334	Ortholog od S. cerevisiae Tis11, a mRNA-binding protein; transcription regulated by yeast-hyphal switch; flow model biofilm induced; Spider biofilm repressed	-1.91648	-1.39561	0.00032
orf19.5334_RC	ORF19.5334	ORF19.5334	Ortholog od S. cerevisiae Tis11, a mRNA-binding protein; transcription regulated by yeast-hyphal switch; flow model biofilm induced; Spider biofilm repressed	-1.64462	-1.07123	0.00167
orf19.5335	ORF19.5335	SGS1	RecQ-related DNA helicase; Bloom's syndrome-related gene; haploinsufficient for wild-type lifespan; upregulated in farnesol treated biofilm	-1.08069	-0.4482	0.28902
orf19.5335_RC	ORF19.5335	SGS1	RecQ-related DNA helicase; Bloom's syndrome-related gene; haploinsufficient for wild-type lifespan; upregulated in farnesol treated biofilm	-1.04589	-0.22081	0.40379
orf19.5338	ORF19.5338	GAL4	Zn(II)2Cys6 transcription factor; involved in control of glycolysis; ortholog of S. cerevisiae Gal4, but not involved in regulation of galactose utilization genes; caspofungin repressed; Spider biofilm repressed	-1.37196	-0.76629	0.00024
orf19.5338_RC	ORF19.5338	GAL4	Zn(II)2Cys6 transcription factor; involved in control of glycolysis; ortholog of S. cerevisiae Gal4, but not involved in regulation of galactose utilization genes; caspofungin repressed; Spider biofilm repressed	-1.0303	-0.1675	0.39724
orf19.5343	ORF19.5343	ASH1	GATA-like transcription factor; localizes to daughter cell, hyphal tip cell nuclei; mRNA localization mediated by She3; required for WT virulence and filamentous growth on solid media; Ras1 repressed in yeast, Cyr1 repressed yeast, hyphae	-2.29553	-1.75923	0.0005
orf19.5343_RC	ORF19.5343	ASH1	GATA-like transcription factor; localizes to daughter cell, hyphal tip cell nuclei; mRNA localization mediated by She3; required for WT virulence and filamentous growth on solid media; Ras1 repressed in yeast, Cyr1 repressed yeast, hyphae	-2.61531	-2.01561	0.0016
orf19.535	ORF19.535	RBR1	Glycosylphosphatidylinositol (GPI)-anchored cell wall protein; required for filamentous growth at acidic pH; expression repressed by Rim101 and activated by Nrg1; Hap43-induced	-1.06629	-0.17235	0.72134
orf19.535_RC	ORF19.535	RBR1	Glycosylphosphatidylinositol (GPI)-anchored cell wall protein; required for filamentous growth at acidic pH; expression repressed by Rim101 and activated by Nrg1; Hap43-induced	1.07838	0.06996	0.12353
orf19.5350	ORF19.5350	ORF19.5350	Ortholog(s) have cyclin-dependent protein serine/threonine kinase activity	-1.10363	-0.28367	0.40869
orf19.5350_RC	ORF19.5350	ORF19.5350	Ortholog(s) have cyclin-dependent protein serine/threonine kinase activity	-1.13704	-0.34375	0.13317
orf19.5357	ORF19.5357	AKL1	Putative serine/threonine protein kinase; induced during the mating process	1.01985	-0.05958	0.89116
orf19.5357_RC	ORF19.5357	AKL1	Putative serine/threonine protein kinase; induced during the mating process	-1.07397	-0.21826	0.14226
orf19.536	ORF19.536	ORF19.536	Ortholog(s) have chromatin binding, protein complex scaffold, ubiquitin binding activity and role in histone acetylation, transcription from RNA polymerase II promoter	-1.25159	-0.62921	0.00506
orf19.536_RC	ORF19.536	ORF19.536	Ortholog(s) have chromatin binding, protein complex scaffold, ubiquitin binding activity and role in histone acetylation, transcription from RNA polymerase II promoter	-1.00761	-0.12334	0.89719
orf19.5376	ORF19.5376	ORF19.5376	Ortholog of S. cerevisiae Elm1; a serine/threonine protein kinase that regulates cellular morphogenesis, septin behavior, and cytokinesis in S. cerevisiae; possibly an essential gene, disruptants not obtained by UAU1 method	-1.06403	-0.21005	0.22088
orf19.5376_RC	ORF19.5376	ORF19.5376	Ortholog of S. cerevisiae Elm1; a serine/threonine protein kinase that regulates cellular morphogenesis, septin behavior, and cytokinesis in S. cerevisiae; possibly an essential gene, disruptants not obtained by UAU1 method	1.27391	0.4569	0.02544
orf19.5377	ORF19.5377	HOS2	Putative histone deacetylase; mutations affect filamentous growth; genetic evidence suggests that Set3p and Hos2p function together as a complex involved in regulation of white-opaque switching, morphogenesis, and virulence	-1.01291	-0.15699	0.4429
orf19.5377_RC	ORF19.5377	HOS2	Putative histone deacetylase; mutations affect filamentous growth; genetic evidence suggests that Set3p and Hos2p function together as a complex involved in regulation of white-opaque switching, morphogenesis, and virulence	1.00371	-0.06241	0.72479
orf19.5380	ORF19.5380	LYS144	Zn(II)2Cys6 transcription factor; has similarity to S. cerevisiae Lys14, involved in the regulation of lysine biosynthesis genes	-1.12781	-0.27783	0.06278
orf19.5380_RC	ORF19.5380	LYS144	Zn(II)2Cys6 transcription factor; has similarity to S. cerevisiae Lys14, involved in the regulation of lysine biosynthesis genes	-1.06895	-0.17424	0.31482
orf19.5389	ORF19.5389	FKH2	Forkhead transcription factor; morphogenesis regulator; required for wild-type hyphal transcription, cell separation, and for virulence in cell culture; mutant lacks true hyphae, is constitutively pseudohyphal; upregulated in RHE model	1.27334	0.40187	0.02845
orf19.5389_RC	ORF19.5389	FKH2	Forkhead transcription factor; morphogenesis regulator; required for wild-type hyphal transcription, cell separation, and for virulence in cell culture; mutant lacks true hyphae, is constitutively pseudohyphal; upregulated in RHE model	1.49757	0.74948	0.01684
orf19.5408	ORF19.5408	HRK1	Putative serine/threonine kinase; predicted role in cellular ion homeostasis; Spider biofilm repressed	-1.65745	-1.30598	9.37555e-05
orf19.5408_RC	ORF19.5408	HRK1	Putative serine/threonine kinase; predicted role in cellular ion homeostasis; Spider biofilm repressed	-1.32898	-0.79011	0.00036
orf19.5423	ORF19.5423	EST3	Telomerase subunit; required for telomere maintenance in vivo; separable roles in telomerase activity and processivity; not required for catalytic activity in vitro; related to mammalian Tpp1p	1.3267	0.84103	0.00318
orf19.5423_RC	ORF19.5423	EST3	Telomerase subunit; required for telomere maintenance in vivo; separable roles in telomerase activity and processivity; not required for catalytic activity in vitro; related to mammalian Tpp1p	1.00741	-0.02938	0.47969
orf19.5438	ORF19.5438	ORF19.5438	Putative ubiquitin-protein ligase; role in protein sumoylation, protein ubiquitination; Spider biofilm induced	-1.02756	-0.18926	0.50984
orf19.5438_RC	ORF19.5438	ORF19.5438	Putative ubiquitin-protein ligase; role in protein sumoylation, protein ubiquitination; Spider biofilm induced	1.01543	-0.08762	0.32339
orf19.5501	ORF19.5501	YAF9	Subunit of the NuA4 histone acetyltransferase complex; transcript regulated by Mig1; possibly an essential gene, disruptants not obtained by UAU1 method	1.33267	0.49363	0.02361
orf19.5501_RC	ORF19.5501	YAF9	Subunit of the NuA4 histone acetyltransferase complex; transcript regulated by Mig1; possibly an essential gene, disruptants not obtained by UAU1 method	1.42934	0.62925	0.00679
orf19.5537	ORF19.5537	WSC2	Putative cell wall integrity and stress response protein; mRNA binds She3; Spider biofilm induced	1.02143	-0.04227	0.25297
orf19.5537_RC	ORF19.5537	WSC2	Putative cell wall integrity and stress response protein; mRNA binds She3; Spider biofilm induced	-1.02531	-0.13536	0.66992
orf19.5548	ORF19.5548	LYS14	Zn(II)2Cys6 transcription factor; has similarity to S. cerevisiae Lys14, which is a transcription factor involved in the regulation of lysine biosynthesis genes	-1.11744	-0.30872	0.01908
orf19.5548_RC	ORF19.5548	LYS14	Zn(II)2Cys6 transcription factor; has similarity to S. cerevisiae Lys14, which is a transcription factor involved in the regulation of lysine biosynthesis genes	-1.10576	-0.28756	0.17313
orf19.5551	ORF19.5551	MIF2	Centromere-associated protein; similar to CENP-C proteins; Cse4p and Mif2p colocalize at C. albicans centromeres	1.30481	0.71368	0.05037
orf19.5551_RC	ORF19.5551	MIF2	Centromere-associated protein; similar to CENP-C proteins; Cse4p and Mif2p colocalize at C. albicans centromeres	1.18992	0.45967	0.09253
orf19.5636	ORF19.5636	RBT5	GPI-linked cell wall protein; hemoglobin utilization; Rfg1, Rim101, Tbf1, Fe regulated; Sfu1, Hog1, Tup1, serum, alkaline pH, antifungal drugs, geldamycin repressed; Hap43 induced; required for RPMI biofilms; Spider biofilm induced	-1.28593	-0.59169	0.09811
orf19.5636_RC	ORF19.5636	RBT5	GPI-linked cell wall protein; hemoglobin utilization; Rfg1, Rim101, Tbf1, Fe regulated; Sfu1, Hog1, Tup1, serum, alkaline pH, antifungal drugs, geldamycin repressed; Hap43 induced; required for RPMI biofilms; Spider biofilm induced	-1.26392	-0.53347	0.09286
orf19.5651	ORF19.5651	ORF19.5651	Ortholog(s) have histone demethylase activity (H3-dimethyl-K4 specific), histone demethylase activity (H3-trimethyl-K4 specific) activity	-1.54696	-0.96404	0.00119
orf19.5651_RC	ORF19.5651	ORF19.5651	Ortholog(s) have histone demethylase activity (H3-dimethyl-K4 specific), histone demethylase activity (H3-trimethyl-K4 specific) activity	-1.79321	-1.26166	0.0029
orf19.5660	ORF19.5660	ORF19.5660	Ortholog(s) have ubiquitin-protein ligase activity, role in protein import into peroxisome matrix, protein ubiquitination and endoplasmic reticulum, peroxisomal membrane localization	-1.84734	-1.27956	0.00346
orf19.5660_RC	ORF19.5660	ORF19.5660	Ortholog(s) have ubiquitin-protein ligase activity, role in protein import into peroxisome matrix, protein ubiquitination and endoplasmic reticulum, peroxisomal membrane localization	-2.00066	-1.42646	0.0031
orf19.5661	ORF19.5661	PTC7	Protein phosphatase, type 2C; has S/T phosphatase activity, Mn2+/Mg2+ dependent; predicted membrane-spanning segment and mitochondrion-targeting signal	-1.00637	0.43112	0.33134
orf19.5661_RC	ORF19.5661	PTC7	Protein phosphatase, type 2C; has S/T phosphatase activity, Mn2+/Mg2+ dependent; predicted membrane-spanning segment and mitochondrion-targeting signal	1.0085	0.77519	0.52238
orf19.5676	ORF19.5676	ORF19.5676	Ortholog(s) have cytosol, nucleus localization	1.113	0.17923	0.38038
orf19.5676_RC	ORF19.5676	ORF19.5676	Ortholog(s) have cytosol, nucleus localization	1.26421	0.43809	0.02694
orf19.5698	ORF19.5698	ORF19.5698	Putative mitochondrial ribosomal protein of the large subunit; transcript is upregulated in clinical isolates from HIV+ patients with oral candidiasis; Spider biofilm repressed	1.52584	0.77776	0.00185
orf19.5698_RC	ORF19.5698	ORF19.5698	Putative mitochondrial ribosomal protein of the large subunit; transcript is upregulated in clinical isolates from HIV+ patients with oral candidiasis; Spider biofilm repressed	1.02544	0.31897	0.72795
orf19.5722	ORF19.5722	ORF19.5722	Ortholog(s) have DNA binding activity	-1.243	-0.65738	0.06891
orf19.5722_RC	ORF19.5722	ORF19.5722	Ortholog(s) have DNA binding activity	-1.41086	-1.0419	0.10024
orf19.5729	ORF19.5729	FGR17	Putative DNA-binding transcription factor; has zinc cluster DNA-binding motif; lacks an ortholog in S. cerevisiae; transposon mutation affects filamentous growth; Hap43p-repressed gene	-1.59148	-0.96116	0.0087
orf19.5729_RC	ORF19.5729	FGR17	Putative DNA-binding transcription factor; has zinc cluster DNA-binding motif; lacks an ortholog in S. cerevisiae; transposon mutation affects filamentous growth; Hap43p-repressed gene	-1.34511	-0.65679	0.01179
orf19.5734	ORF19.5734	POP2	Component of the Ccr4-Pop2 mRNA deadenylase; heterozygous null mutant exhibits resistance to parnafungin and cordycepin in the C. albicans fitness test	-1.02361	-0.13202	0.28667
orf19.5734_RC	ORF19.5734	POP2	Component of the Ccr4-Pop2 mRNA deadenylase; heterozygous null mutant exhibits resistance to parnafungin and cordycepin in the C. albicans fitness test	-1.05593	-0.24874	0.81589
orf19.5736	ORF19.5736	ALS5	ALS family adhesin; highly variable; expression in S. cerevisiae causes adhesion to human epithelium, endothelium or ECM, endothelial invasiveness by endocytosis and, at high abundance, ECM-induced aggregation; can form amyloid fibrils	-1.05951	-0.73713	0.17453
orf19.5736_RC	ORF19.5736	ALS5	ALS family adhesin; highly variable; expression in S. cerevisiae causes adhesion to human epithelium, endothelium or ECM, endothelial invasiveness by endocytosis and, at high abundance, ECM-induced aggregation; can form amyloid fibrils	-1.0602	-0.39652	0.75755
orf19.5742	ORF19.5742	ALS9	ALS family cell-surface glycoprotein; expressed during infection of human epithelial cells; confers laminin adhesion to S. cerevisiae; highly variable; putative GPI-anchor; Hap43-repressed	-1.04346	-0.40997	0.55788
orf19.5742_RC	ORF19.5742	ALS9	ALS family cell-surface glycoprotein; expressed during infection of human epithelial cells; confers laminin adhesion to S. cerevisiae; highly variable; putative GPI-anchor; Hap43-repressed	1.01555	0.93703	0.56231
orf19.5758	ORF19.5758	SAL6	Putative protein phosphatase of the Type 1 family; serine/threonine-specific; similar to S. cerevisiae Ppq1; mutant has virulence defect; Spider biofilm induced	-1.52017	-0.92884	0.00267
orf19.5758_RC	ORF19.5758	SAL6	Putative protein phosphatase of the Type 1 family; serine/threonine-specific; similar to S. cerevisiae Ppq1; mutant has virulence defect; Spider biofilm induced	-1.83213	-1.2374	0.00444
orf19.5760	ORF19.5760	IHD1	GPI-anchored protein; alkaline, hypha-induced; regulated by Nrg1, Rfg1, Tup1 and Tsa1, Tsa1B in minimal media at 37; oralpharyngeal candidasis induced ; Spider biofilm induced; regulated in Spider biofilms by Tec1, Efg1, Ndt80, Rob1, Brg1	2.59223	1.70605	0.00057
orf19.5760_RC	ORF19.5760	IHD1	GPI-anchored protein; alkaline, hypha-induced; regulated by Nrg1, Rfg1, Tup1 and Tsa1, Tsa1B in minimal media at 37; oralpharyngeal candidasis induced ; Spider biofilm induced; regulated in Spider biofilms by Tec1, Efg1, Ndt80, Rob1, Brg1	2.17037	1.47627	0.00218
orf19.5762	ORF19.5762	PGA61	Putative GPI-anchored protein	2.06358	1.30794	0.00513
orf19.5762_RC	ORF19.5762	PGA61	Putative GPI-anchored protein	2.06883	1.34487	0.00843
orf19.5764	ORF19.5764	SKI8	Ortholog(s) have role in nuclear-transcribed mRNA catabolic process, 3'-5' exonucleolytic nonsense-mediated decay, nuclear-transcribed mRNA catabolic process, non-stop decay and protein complex assembly, more	-1.01475	0.23837	0.2638
orf19.5764_RC	ORF19.5764	SKI8	Ortholog(s) have role in nuclear-transcribed mRNA catabolic process, 3'-5' exonucleolytic nonsense-mediated decay, nuclear-transcribed mRNA catabolic process, non-stop decay and protein complex assembly, more	-1.02333	-0.00698	0.23785
orf19.5844	ORF19.5844	ORF19.5844	Ortholog(s) have role in meiotic DNA recombinase assembly, reciprocal meiotic recombination and condensed nuclear chromosome localization	-1.043	-0.31416	0.80583
orf19.5844_RC	ORF19.5844	ORF19.5844	Ortholog(s) have role in meiotic DNA recombinase assembly, reciprocal meiotic recombination and condensed nuclear chromosome localization	1.01091	0.06409	0.38719
orf19.5848	ORF19.5848	ORF19.5848	RING-type zinc finger protein; upregulated during oral infection; mutants have reduced ability to damage oral epithelial cells; Spider and flow model biofilm induced	1.07633	0.06321	0.31785
orf19.5848_RC	ORF19.5848	ORF19.5848	RING-type zinc finger protein; upregulated during oral infection; mutants have reduced ability to damage oral epithelial cells; Spider and flow model biofilm induced	1.01888	-0.03828	0.39147
orf19.5849	ORF19.5849	CWT1	Zn2Cys6 transcription factor involved in negative regulation of nitrosative stress response; mutant has cell wall defects; transcription increased at stationary phase; has predicted PAS domain; similar to S. cerevisiae Rds2p	-1.66625	-1.31957	0.00109
orf19.5849_RC	ORF19.5849	CWT1	Zn2Cys6 transcription factor involved in negative regulation of nitrosative stress response; mutant has cell wall defects; transcription increased at stationary phase; has predicted PAS domain; similar to S. cerevisiae Rds2p	-1.26818	-0.67958	0.0012
orf19.5855	ORF19.5855	MBP1	Putative component of the MBF transcription complex involved in G1/S cell-cycle progression; non-periodic mRNA expression; predicted, conserved MBF binding sites upstream of G1/S-regulated genes	-1.10267	-0.32345	0.078
orf19.5855_RC	ORF19.5855	MBP1	Putative component of the MBF transcription complex involved in G1/S cell-cycle progression; non-periodic mRNA expression; predicted, conserved MBF binding sites upstream of G1/S-regulated genes	-1.74094	-1.14037	0.00662
orf19.59	ORF19.59	REI1	Putative cytoplasmic pre-60S factor; Hap43-induced; repressed by prostaglandins	2.29556	1.58926	0.00456
orf19.59_RC	ORF19.59	REI1	Putative cytoplasmic pre-60S factor; Hap43-induced; repressed by prostaglandins	2.60537	1.88006	0.00191
orf19.5917	ORF19.5917	STP3	Transcription factor; regulates SAP2, OPT1 expression and thereby protein catabolism for nitrogen source; activated via amino-acid-induced proteolytic processing; macrophage/pseudohyphal-repressed; Spider biofilm repressed	1.13668	0.17068	0.23003
orf19.5917_RC	ORF19.5917	STP3	Transcription factor; regulates SAP2, OPT1 expression and thereby protein catabolism for nitrogen source; activated via amino-acid-induced proteolytic processing; macrophage/pseudohyphal-repressed; Spider biofilm repressed	1.22923	0.42225	0.0202
orf19.5940	ORF19.5940	ZCF32	Predicted Zn(II)2Cys6 transcription factor; possibly an essential gene, disruptants not obtained by UAU1 method; Hap43-repressed	-1.38694	-0.74404	0.00014
orf19.5940_RC	ORF19.5940	ZCF32	Predicted Zn(II)2Cys6 transcription factor; possibly an essential gene, disruptants not obtained by UAU1 method; Hap43-repressed	-1.46394	-0.85291	8.09141e-05
orf19.5953	ORF19.5953	ORF19.5953	C2H2 transcription factor; predicted regulator of ribosomal protein and biogenesis genes; possibly essential, disruptants not obtained by UAU1 method; rat catheter biofilm induced	-2.385	-1.83627	0.00048
orf19.5953_RC	ORF19.5953	ORF19.5953	C2H2 transcription factor; predicted regulator of ribosomal protein and biogenesis genes; possibly essential, disruptants not obtained by UAU1 method; rat catheter biofilm induced	-1.88895	-1.36646	0.00013
orf19.5954	ORF19.5954	ORF19.5954	Ortholog(s) have enzyme activator activity, role in ascospore wall assembly, meiosis I, positive regulation of protein catabolic process and anaphase-promoting complex localization	2.84651	2.94686	0.00769
orf19.5954_RC	ORF19.5954	ORF19.5954	Ortholog(s) have enzyme activator activity, role in ascospore wall assembly, meiosis I, positive regulation of protein catabolic process and anaphase-promoting complex localization	2.26626	2.38813	0.00341
orf19.5956	ORF19.5956	PIN3	Putative SH3-domain-containing protein; predicted role in actin cytoskeleton organization; Spider biofilm repressed	-1.00985	0.35084	0.5737
orf19.5956_RC	ORF19.5956	PIN3	Putative SH3-domain-containing protein; predicted role in actin cytoskeleton organization; Spider biofilm repressed	-1.02449	0.01637	0.81218
orf19.5968	ORF19.5968	RDI1	Putative rho GDP dissociation inhibitor; transposon mutation affects filamentous growth; farnesol, filament-induced; regulated by Nrg1, Tup1; protein levels low in stationary phase yeast	-1.44301	-0.7697	0.00447
orf19.5968_RC	ORF19.5968	RDI1	Putative rho GDP dissociation inhibitor; transposon mutation affects filamentous growth; farnesol, filament-induced; regulated by Nrg1, Tup1; protein levels low in stationary phase yeast	-1.1403	-0.30326	0.00404
orf19.5975	ORF19.5975	TRY4	C2H2 transcription factor; fluconazole-repressed; induced in ssr1 mutant; required for yeast cell adherence to silicone substrate; Spider biofilm induced	-1.13813	-0.34568	0.56722
orf19.5975_RC	ORF19.5975	TRY4	C2H2 transcription factor; fluconazole-repressed; induced in ssr1 mutant; required for yeast cell adherence to silicone substrate; Spider biofilm induced	-1.61215	-1.0472	0.05632
orf19.6028	ORF19.6028	HGC1	Hypha-specific G1 cyclin-related protein involved in regulation of morphogenesis, biofilm formation; Cdc28-Hgc1 maintains Cdc11 S394 phosphorylation during hyphal growth; required for virulence in mice; regulated by Nrg1, Tup1, farnesol	-1.42678	-0.86255	0.00228
orf19.6028_RC	ORF19.6028	HGC1	Hypha-specific G1 cyclin-related protein involved in regulation of morphogenesis, biofilm formation; Cdc28-Hgc1 maintains Cdc11 S394 phosphorylation during hyphal growth; required for virulence in mice; regulated by Nrg1, Tup1, farnesol	-1.12635	-0.33986	0.0052
orf19.6038	ORF19.6038	UGA32	Predicted Zn(II)2Cys6 transcription factor; has similarity to S. cerevisiae Uga3, a transcription factor involved in the regulation of gamma-aminobutyrate metabolism genes; rat catheter biofilm induced	-1.22286	-0.63379	0.01521
orf19.6038_RC	ORF19.6038	UGA32	Predicted Zn(II)2Cys6 transcription factor; has similarity to S. cerevisiae Uga3, a transcription factor involved in the regulation of gamma-aminobutyrate metabolism genes; rat catheter biofilm induced	-1.0429	-0.2214	0.37579
orf19.6081	ORF19.6081	PHR2	Glycosidase; role in vaginal not systemic infection (low pH not neutral); low pH, high iron, fluconazole, Hap43-induced; Rim101-repressed at pH8; rat catheter biofilm induced; Bcr1-repressed in RPMI a/a biofilms	2.3777	1.55899	0.00063
orf19.6081_RC	ORF19.6081	PHR2	Glycosidase; role in vaginal not systemic infection (low pH not neutral); low pH, high iron, fluconazole, Hap43-induced; Rim101-repressed at pH8; rat catheter biofilm induced; Bcr1-repressed in RPMI a/a biofilms	2.32929	1.51267	0.00059
orf19.6102	ORF19.6102	RCA1	Protein involved in regulation of carbonic anhydrases; controls CO2 sensing; bZIP domain-containing transcription factor of the ATF/CREB family; null mutant displays slow growth, abnormal colony morphology and invasive growth	-1.08978	-1.32226	0.81238
orf19.6102_RC	ORF19.6102	RCA1	Protein involved in regulation of carbonic anhydrases; controls CO2 sensing; bZIP domain-containing transcription factor of the ATF/CREB family; null mutant displays slow growth, abnormal colony morphology and invasive growth	-1.05891	-0.75144	0.08536
orf19.6109	ORF19.6109	TUP1	Transcriptional corepressor; represses filamentous growth; regulates switching; role in germ tube induction, farnesol response; in repression pathways with Nrg1, Rfg1; farnesol upregulated in biofilm; rat catheter, Spider biofilm repressed	1.01218	-0.06061	0.64066
orf19.6109_RC	ORF19.6109	TUP1	Transcriptional corepressor; represses filamentous growth; regulates switching; role in germ tube induction, farnesol response; in repression pathways with Nrg1, Rfg1; farnesol upregulated in biofilm; rat catheter, Spider biofilm repressed	-1.02383	-0.13585	0.4432
orf19.6124	ORF19.6124	ACE2	Transcription factor; similar to S. cerevisiae Ace2 and Swi5; regulates morphogenesis, cell separation, adherence, virulence in a mice; mutant is hyperfilamentous; rat catheter and Spider biofilm induced	-1.12659	-0.39579	0.11712
orf19.6124_RC	ORF19.6124	ACE2	Transcription factor; similar to S. cerevisiae Ace2 and Swi5; regulates morphogenesis, cell separation, adherence, virulence in a mice; mutant is hyperfilamentous; rat catheter and Spider biofilm induced	-1.20319	-0.69005	0.13174
orf19.6133	ORF19.6133	PIF1	Putative DNA helicase; decreased transcription is observed upon fluphenazine treatment	1.04807	0.15759	0.34477
orf19.6133_RC	ORF19.6133	PIF1	Putative DNA helicase; decreased transcription is observed upon fluphenazine treatment	1.01389	-0.01939	0.84287
orf19.6142	ORF19.6142	ORF19.6142	Ortholog(s) have double-stranded DNA binding activity, role in reciprocal meiotic recombination and condensed nuclear chromosome localization	-1.05564	-0.34991	0.02682
orf19.6142_RC	ORF19.6142	ORF19.6142	Ortholog(s) have double-stranded DNA binding activity, role in reciprocal meiotic recombination and condensed nuclear chromosome localization	-1.02943	-0.17944	0.30755
orf19.6163	ORF19.6163	CSE4	Centromeric histone H3 variant; role in structural changes of centromeric nucleosomes during cell cycle; 4 nucleosomes bind 1 centromere, each has 1 Cse4 molecule during most of cell cycle, 2 molecules in anaphase; Spider biofilm repressed	1.06667	0.25854	0.08217
orf19.6163_RC	ORF19.6163	CSE4	Centromeric histone H3 variant; role in structural changes of centromeric nucleosomes during cell cycle; 4 nucleosomes bind 1 centromere, each has 1 Cse4 molecule during most of cell cycle, 2 molecules in anaphase; Spider biofilm repressed	1.0092	0.58055	0.53234
orf19.6170	ORF19.6170	ORF19.6170	Ortholog(s) have microtubule binding, protein heterodimerization activity, protein homodimerization activity	-1.0115	-0.01175	0.95878
orf19.6170_RC	ORF19.6170	ORF19.6170	Ortholog(s) have microtubule binding, protein heterodimerization activity, protein homodimerization activity	-1.10919	-0.4193	0.18703
orf19.6182	ORF19.6182	ZCF34	Zn(II)2Cys6 transcription factor; null mutant displays fluconazole sensitivity; Hap43-repressed gene; mutants display decreased colonization of mouse kidneys; required for yeast cell adherence to silicone substrate	2.27726	1.57313	0.00701
orf19.6182_RC	ORF19.6182	ZCF34	Zn(II)2Cys6 transcription factor; null mutant displays fluconazole sensitivity; Hap43-repressed gene; mutants display decreased colonization of mouse kidneys; required for yeast cell adherence to silicone substrate	1.82778	1.04973	0.00506
orf19.6222	ORF19.6222	SPO22	Ortholog(s) have role in regulation of synaptonemal complex assembly and condensed nuclear chromosome localization	1.20544	0.52526	0.04326
orf19.6222_RC	ORF19.6222	SPO22	Ortholog(s) have role in regulation of synaptonemal complex assembly and condensed nuclear chromosome localization	1.25687	0.60814	0.03672
orf19.6227	ORF19.6227	ORF19.6227	Ortholog of C. dubliniensis CD36 : Cd36_06390, C. parapsilosis CDC317 : CPAR2_209040, Candida tenuis NRRL Y-1498 : CANTEDRAFT_114052 and Debaryomyces hansenii CBS767 : DEHA2D14300g	-1.02948	-0.09646	0.78378
orf19.6227_RC	ORF19.6227	ORF19.6227	Ortholog of C. dubliniensis CD36 : Cd36_06390, C. parapsilosis CDC317 : CPAR2_209040, Candida tenuis NRRL Y-1498 : CANTEDRAFT_114052 and Debaryomyces hansenii CBS767 : DEHA2D14300g	-1.00891	0.37241	0.42463
orf19.6239	ORF19.6239	ORF19.6239	Putative serine/threonine protein kinase; possibly an essential gene, disruptants not obtained by UAU1 method	-1.09195	-0.26223	0.07565
orf19.6239_RC	ORF19.6239	ORF19.6239	Putative serine/threonine protein kinase; possibly an essential gene, disruptants not obtained by UAU1 method	-1.55309	-0.96199	0.00163
orf19.6243	ORF19.6243	VPS34	Autophosphorylated class III phosphatidylinositol 3-kinase; required for normal vesicle transport, hyphal growth, fibroblast adherence, virulence in mouse systemic infection; growth-regulated; caspofungin and hydrogen peroxide sensitivity	1.94798	1.25846	0.155
orf19.6243_RC	ORF19.6243	VPS34	Autophosphorylated class III phosphatidylinositol 3-kinase; required for normal vesicle transport, hyphal growth, fibroblast adherence, virulence in mouse systemic infection; growth-regulated; caspofungin and hydrogen peroxide sensitivity	1.82881	1.13127	0.14863
orf19.6275	ORF19.6275	ORF19.6275	Ortholog(s) have cytosol localization	-1.60765	-1.25646	0.00128
orf19.6275_RC	ORF19.6275	ORF19.6275	Ortholog(s) have cytosol localization	-1.18832	-0.50104	0.004
orf19.6285	ORF19.6285	GLC7	Putative catalytic subunit of type 1 serine/threonine protein phosphatase; regulated by Shp1; induced in high iron; alternatively spliced intron in 5' UTR	-1.06497	-0.21183	0.15241
orf19.6285_RC	ORF19.6285	GLC7	Putative catalytic subunit of type 1 serine/threonine protein phosphatase; regulated by Shp1; induced in high iron; alternatively spliced intron in 5' UTR	-1.09692	-0.2619	0.16329
orf19.6302	ORF19.6302	PGA39	Putative GPI-anchored protein	-1.0737	-0.48252	0.24509
orf19.6302_RC	ORF19.6302	PGA39	Putative GPI-anchored protein	-1.01713	0.18396	0.59575
orf19.6305	ORF19.6305	ORF19.6305	Hydroxytrimethyllysine aldolase, the second enzyme in the carnitine biosynthesis pathway; rat catheter biofilm repressed	1.2228	0.32027	0.07794
orf19.6305_RC	ORF19.6305	ORF19.6305	Hydroxytrimethyllysine aldolase, the second enzyme in the carnitine biosynthesis pathway; rat catheter biofilm repressed	-1.13001	-0.33126	0.72132
orf19.6321	ORF19.6321	PGA48	Putative GPI-anchored adhesin-like protein; similar to S. cerevisiae Spi1p, which is induced at stationary phase; transcript induced in high iron; flow model biofilm induced; Spider biofilm repressed	1.02511	0.00475	0.88536
orf19.6321_RC	ORF19.6321	PGA48	Putative GPI-anchored adhesin-like protein; similar to S. cerevisiae Spi1p, which is induced at stationary phase; transcript induced in high iron; flow model biofilm induced; Spider biofilm repressed	1.08104	0.07155	0.1672
orf19.6365	ORF19.6365	PTP1	Phosphotyrosine-specific protein phosphatase; rat catheter biofilm induced	-1.17226	-0.49823	0.00358
orf19.6365_RC	ORF19.6365	PTP1	Phosphotyrosine-specific protein phosphatase; rat catheter biofilm induced	-1.03759	-0.18091	0.7601
orf19.6376	ORF19.6376	PTC5	Mitochondrial protein phosphatase of the Type 2C-related family (serine/threonine-specific), involved in drug response and cadmium tolerance	2.10613	1.41573	0.01657
orf19.6376_RC	ORF19.6376	PTC5	Mitochondrial protein phosphatase of the Type 2C-related family (serine/threonine-specific), involved in drug response and cadmium tolerance	1.6137	0.87691	0.01911
orf19.6407	ORF19.6407	ORF19.6407	Ortholog(s) have role in ribosomal large subunit biogenesis and cytoplasm, cytosolic large ribosomal subunit, preribosome, large subunit precursor localization	-1.39173	-0.94353	0.00105
orf19.6407_RC	ORF19.6407	ORF19.6407	Ortholog(s) have role in ribosomal large subunit biogenesis and cytoplasm, cytosolic large ribosomal subunit, preribosome, large subunit precursor localization	-1.07661	-0.2885	0.00341
orf19.643	ORF19.643	ORF19.643	Ortholog(s) have role in apoptotic process, mitotic spindle elongation, sister chromatid biorientation, spindle assembly checkpoint	-1.02757	-0.05335	0.97528
orf19.643_RC	ORF19.643	ORF19.643	Ortholog(s) have role in apoptotic process, mitotic spindle elongation, sister chromatid biorientation, spindle assembly checkpoint	1.00991	0.8077	0.64212
orf19.6472	ORF19.6472	CYP1	Peptidyl-prolyl cis-trans isomerase; cyclosporin A sensitive activity; soluble in hyphae; biofilm induced, macrophage-induced protein; downregulated upon treatment of biofilm with farnesol; present in exponential and stationary phase cells	-1.07423	-0.66841	0.05894
orf19.6472_RC	ORF19.6472	CYP1	Peptidyl-prolyl cis-trans isomerase; cyclosporin A sensitive activity; soluble in hyphae; biofilm induced, macrophage-induced protein; downregulated upon treatment of biofilm with farnesol; present in exponential and stationary phase cells	1.01222	0.8608	0.65328
orf19.6506	ORF19.6506	ORF19.6506	Ortholog(s) have role in histone deacetylation, negative regulation of antisense RNA transcription, regulation of DNA-dependent DNA replication initiation, transcription elongation from RNA polymerase II promoter	1.21712	0.31088	0.05257
orf19.6506_RC	ORF19.6506	ORF19.6506	Ortholog(s) have role in histone deacetylation, negative regulation of antisense RNA transcription, regulation of DNA-dependent DNA replication initiation, transcription elongation from RNA polymerase II promoter	1.10588	0.12534	0.15639
orf19.6514	ORF19.6514	CUP9	Transcription factor; upregulated in clinical strains from HIV patients with oral candidiasis; yeast-hypha switch repressed; ketoconazole-induced; Plc1-regulated; colony morphology-related Ssn6 regulation; Spider, flow model biofilm induced	-1.01366	0.26342	0.45801
orf19.6514_RC	ORF19.6514	CUP9	Transcription factor; upregulated in clinical strains from HIV patients with oral candidiasis; yeast-hypha switch repressed; ketoconazole-induced; Plc1-regulated; colony morphology-related Ssn6 regulation; Spider, flow model biofilm induced	-1.02322	0.04524	0.89771
orf19.6537	ORF19.6537	ORF19.6537	Ortholog(s) have role in chromosome segregation and nuclear MIS12/MIND complex, spindle pole localization	1.2752	0.6536	0.01723
orf19.6537_RC	ORF19.6537	ORF19.6537	Ortholog(s) have role in chromosome segregation and nuclear MIS12/MIND complex, spindle pole localization	-1.07179	-0.31925	0.72238
orf19.6551.1	ORF19.6551.1	STE18	Protein similar to S. cerevisiae Ste18p; expressed in opaque or white MTLa/MTLa or MTLalpha/MTLalpha, but not MTLa/MTLalpha cells; MTLa1p, MTLalpha2p bind promoter region	1.47152	1.17976	0.00629
orf19.6551.1_RC	ORF19.6551.1	STE18	Protein similar to S. cerevisiae Ste18p; expressed in opaque or white MTLa/MTLa or MTLalpha/MTLalpha, but not MTLa/MTLalpha cells; MTLa1p, MTLalpha2p bind promoter region	1.35444	0.94512	0.01664
orf19.6568	ORF19.6568	SMC6	Putative structural maintenance of chromosomes (SMC) protein; Hap43-induced; cell-cycle regulated periodic mRNA expression; S. cerevisiae ortholog not cell-cycle regulated; Spider biofilm induced	1.17608	0.48409	0.04991
orf19.6568_RC	ORF19.6568	SMC6	Putative structural maintenance of chromosomes (SMC) protein; Hap43-induced; cell-cycle regulated periodic mRNA expression; S. cerevisiae ortholog not cell-cycle regulated; Spider biofilm induced	1.03853	0.11141	0.1027
orf19.6573	ORF19.6573	BEM2	Putative Rho1p GTPase activating protein (GAP); serum-induced transcript; Spider biofilm induced; flow model biofilm repressed	2.67965	1.85825	0.00191
orf19.6573_RC	ORF19.6573	BEM2	Putative Rho1p GTPase activating protein (GAP); serum-induced transcript; Spider biofilm induced; flow model biofilm repressed	2.24464	1.49428	0.00561
orf19.658	ORF19.658	GIN1	Protein involved in regulation of DNA-damage-induced filamentous growth; putative component of DNA replication checkpoint; ortholog of S. cerevisiae Mrc1p, an S-phase checkpoint protein; Hap43p-induced gene	1.39223	0.87473	0.01614
orf19.658_RC	ORF19.658	GIN1	Protein involved in regulation of DNA-damage-induced filamentous growth; putative component of DNA replication checkpoint; ortholog of S. cerevisiae Mrc1p, an S-phase checkpoint protein; Hap43p-induced gene	1.41513	0.93607	0.00995
orf19.6588	ORF19.6588	NBP2	Protein containing an SH3 domain; involved in vacuolar fusion in hyphae; mutants form multiple germ tubes; Spider biofilm induced	-1.34669	-0.81637	0.00042
orf19.6588_RC	ORF19.6588	NBP2	Protein containing an SH3 domain; involved in vacuolar fusion in hyphae; mutants form multiple germ tubes; Spider biofilm induced	-1.10846	-0.32446	0.00903
orf19.6589	ORF19.6589	SSF1	Protein involved in ribosome biogenesis; ortholog of S. cerevisiae Ssf1; Hap43-induced; rat catheter and Spider biofilm induced	-1.52013	-1.35511	0.0003
orf19.6589_RC	ORF19.6589	SSF1	Protein involved in ribosome biogenesis; ortholog of S. cerevisiae Ssf1; Hap43-induced; rat catheter and Spider biofilm induced	-1.15401	-0.49711	0.03705
orf19.6610	ORF19.6610	ORF19.6610	Ortholog(s) have microtubule binding, structural constituent of cytoskeleton activity	-1.03986	-0.31778	0.03077
orf19.6610_RC	ORF19.6610	ORF19.6610	Ortholog(s) have microtubule binding, structural constituent of cytoskeleton activity	-1.0053	0.45581	0.69709
orf19.6638	ORF19.6638	PTC4	Type PP2C serine/threonine phosphatase; localized to mitochondria; mutation causes sensitivity to sodium, potassium and azole drugs; decreased expression in hyphae compared to yeast-form cells	-1.0572	-0.55363	0.56134
orf19.6638_RC	ORF19.6638	PTC4	Type PP2C serine/threonine phosphatase; localized to mitochondria; mutation causes sensitivity to sodium, potassium and azole drugs; decreased expression in hyphae compared to yeast-form cells	-1.00589	0.44206	0.35091
orf19.6645	ORF19.6645	HMO1	HMG-box transcription factor; binds upstream of hexose and ergosterol metabolism and cell cycle genes; activates pseudohyphal growth when expressed in S. cerevisiae; repressed in hyphae; Spider biofilm repressed	-1.16808	-0.47426	0.00286
orf19.6645_RC	ORF19.6645	HMO1	HMG-box transcription factor; binds upstream of hexose and ergosterol metabolism and cell cycle genes; activates pseudohyphal growth when expressed in S. cerevisiae; repressed in hyphae; Spider biofilm repressed	1.05346	-0.01056	0.00071
orf19.6680	ORF19.6680	FGR27	Zn(II)2Cys6 transcription factor; transposon mutation affects filamentous growth; required for yeast cell adherence to silicone substrate; Spider biofilm induced	-1.09342	-0.26493	0.09517
orf19.6680_RC	ORF19.6680	FGR27	Zn(II)2Cys6 transcription factor; transposon mutation affects filamentous growth; required for yeast cell adherence to silicone substrate; Spider biofilm induced	-1.15689	-0.38189	0.14972
orf19.6753	ORF19.6753	ORF19.6753	Protein with a predicted RING-type zinc finger; possibly an essential gene, disruptants not obtained by UAU1 method	-1.02793	-0.06156	0.31889
orf19.6753_RC	ORF19.6753	ORF19.6753	Protein with a predicted RING-type zinc finger; possibly an essential gene, disruptants not obtained by UAU1 method	-1.04667	-0.39086	0.85491
orf19.676	ORF19.676	ORF19.676	Microtubule-binding protein of the cortical microtubule; delays exit from mitosis when the spindle is abnormally oriented; Spider biofilm repressed	1.34165	0.77861	0.31578
orf19.676_RC	ORF19.676	ORF19.676	Microtubule-binding protein of the cortical microtubule; delays exit from mitosis when the spindle is abnormally oriented; Spider biofilm repressed	1.14118	0.34813	0.62918
orf19.6760	ORF19.6760	MDS3	TOR signaling pathway component; required for growth and hyphal formation at alkaline pH, for full virulence in a mouse model of systemic infection and for SD and Spider medium biofilm formation; role in chlamydospore formation	-1.05768	-0.27069	0.65846
orf19.6760_RC	ORF19.6760	MDS3	TOR signaling pathway component; required for growth and hyphal formation at alkaline pH, for full virulence in a mouse model of systemic infection and for SD and Spider medium biofilm formation; role in chlamydospore formation	1.16325	0.43931	0.01013
orf19.6763	ORF19.6763	SLK19	Alkaline-induced protein of plasma membrane; affects cell aggregation, cell wall; similar to S. cerevisiae Slk19p (a kinetochore protein with roles in mitosis, meiosis); required for wild-type virulence in mouse; macrophage-downregulated	-1.0167	-0.13476	0.97529
orf19.6763_RC	ORF19.6763	SLK19	Alkaline-induced protein of plasma membrane; affects cell aggregation, cell wall; similar to S. cerevisiae Slk19p (a kinetochore protein with roles in mitosis, meiosis); required for wild-type virulence in mouse; macrophage-downregulated	-1.00915	0.36692	0.74805
orf19.6781	ORF19.6781	ZFU2	Zn(II)2Cys6 transcription factor; regulator of yeast form adherence; mutants display increased colonization of mouse kidneys; required for yeast cell adherence to silicone substrate; Spider biofilm induced	-1.02212	-0.12908	0.91552
orf19.6781_RC	ORF19.6781	ZFU2	Zn(II)2Cys6 transcription factor; regulator of yeast form adherence; mutants display increased colonization of mouse kidneys; required for yeast cell adherence to silicone substrate; Spider biofilm induced	-1.39601	-0.74772	0.01639
orf19.6784	ORF19.6784	PGA32	Putative GPI-anchored adhesin-like protein; induced in high iron; Spider biofilm induced	2.94862	2.09369	0.00471
orf19.6784_RC	ORF19.6784	PGA32	Putative GPI-anchored adhesin-like protein; induced in high iron; Spider biofilm induced	2.7204	1.93138	0.00468
orf19.6792	ORF19.6792	RRD1	Putative peptidyl-prolyl cis/trans-isomerase; caspofungin induced	-1.17764	-0.51079	0.01154
orf19.6792_RC	ORF19.6792	RRD1	Putative peptidyl-prolyl cis/trans-isomerase; caspofungin induced	-1.07801	-0.2705	0.05862
orf19.681	ORF19.681	HAP43	CCAAT-binding factor-dependent transcription factor; repressor; also called CAP2; required for low iron response; similar to bZIP transcription factor AP-1; repressed by Sfu1; ciclopirox olamine induced; rat catheter, Spider biofilm induced	-1.40215	-0.7524	0.01108
orf19.681_RC	ORF19.681	HAP43	CCAAT-binding factor-dependent transcription factor; repressor; also called CAP2; required for low iron response; similar to bZIP transcription factor AP-1; repressed by Sfu1; ciclopirox olamine induced; rat catheter, Spider biofilm induced	-1.64884	-1.07277	0.00352
orf19.6810	ORF19.6810	ORF19.6810	Ortholog(s) have protein serine/threonine phosphatase activity	-1.24583	-0.4982	0.00455
orf19.6810_RC	ORF19.6810	ORF19.6810	Ortholog(s) have protein serine/threonine phosphatase activity	1.21231	0.36607	0.02572
orf19.6817	ORF19.6817	FCR1	Transcription factor; repressor of fluconazole/ketoconazole/brefeldin A resistance; Tn mutation enhances filamentation; partially rescues S. cerevisiae pdr1 pdr3 fluconazole sensitivity; rat catheter biofilm induced/Spider biofilm repressed	-1.56996	-0.99378	3.73565e-07
orf19.6817_RC	ORF19.6817	FCR1	Transcription factor; repressor of fluconazole/ketoconazole/brefeldin A resistance; Tn mutation enhances filamentation; partially rescues S. cerevisiae pdr1 pdr3 fluconazole sensitivity; rat catheter biofilm induced/Spider biofilm repressed	-1.96826	-1.37485	0.00021
orf19.6821	ORF19.6821	ORF19.6821	Ortholog(s) have ubiquitin-protein ligase activity	-1.0356	-0.28616	0.72821
orf19.6821_RC	ORF19.6821	ORF19.6821	Ortholog(s) have ubiquitin-protein ligase activity	-1.00208	0.5304	0.79083
orf19.6824	ORF19.6824	TRY6	Helix-loop-helix transcription factor; regulator of yeast form adherence; required for yeast cell adherence to silicone substrate; Spider and F-12/CO2 biofilm induced; repressed by alpha pheromone in SpiderM medium	-1.09274	-0.26369	0.17306
orf19.6824_RC	ORF19.6824	TRY6	Helix-loop-helix transcription factor; regulator of yeast form adherence; required for yeast cell adherence to silicone substrate; Spider and F-12/CO2 biofilm induced; repressed by alpha pheromone in SpiderM medium	-1.37404	-0.68703	0.01751
orf19.684	ORF19.684	ORF19.684	Putative transcription factor with zinc finger DNA-binding motif; heterozygous null mutant exhibits hypersensitivity to parnafungin and cordycepin in the C. albicans fitness test	-1.10081	-0.35059	0.23628
orf19.684_RC	ORF19.684	ORF19.684	Putative transcription factor with zinc finger DNA-binding motif; heterozygous null mutant exhibits hypersensitivity to parnafungin and cordycepin in the C. albicans fitness test	1.27834	0.42285	0.00064
orf19.6850	ORF19.6850	ORF19.6850	Putative transcription factor with C3HC4 zinc finger DNA-binding motif; mutants are viable	-1.04006	-0.21074	0.19839
orf19.6850_RC	ORF19.6850	ORF19.6850	Putative transcription factor with C3HC4 zinc finger DNA-binding motif; mutants are viable	-1.02496	-0.1927	0.20161
orf19.6874	ORF19.6874	ORF19.6874	Putative helix-loop-helix (HLH) transcription factor with a role in filamentous growth	-1.05427	-0.22433	0.6499
orf19.6874_RC	ORF19.6874	ORF19.6874	Putative helix-loop-helix (HLH) transcription factor with a role in filamentous growth	-1.16198	-0.53949	0.01343
orf19.6885	ORF19.6885	SPO7	Putative regulatory subunit of Nem1-Spo7 phosphatase holoenzyme that regulates nuclear growth by controling phospholipid biosynthesis; induced by alpha pheromone in SpiderM medium	-1.02073	-0.16076	0.67353
orf19.6885_RC	ORF19.6885	SPO7	Putative regulatory subunit of Nem1-Spo7 phosphatase holoenzyme that regulates nuclear growth by controling phospholipid biosynthesis; induced by alpha pheromone in SpiderM medium	1.00436	0.67959	0.41041
orf19.6889	ORF19.6889	MKK2	Ortholog of S. cerevisiae Mkk2; MAP kinase kinase involved in signal transduction; macrophage-downregulated; mutants are viable and hypersensitive to caspofungin	-1.20314	-0.4576	0.00205
orf19.6889_RC	ORF19.6889	MKK2	Ortholog of S. cerevisiae Mkk2; MAP kinase kinase involved in signal transduction; macrophage-downregulated; mutants are viable and hypersensitive to caspofungin	-1.72581	-1.18447	0.00283
orf19.6901	ORF19.6901	ORF19.6901	Ortholog(s) have RNA 7-methylguanosine cap binding, exoribonuclease activator activity, m7G(5')pppN diphosphatase activity	-1.03712	-0.15844	0.71885
orf19.6901_RC	ORF19.6901	ORF19.6901	Ortholog(s) have RNA 7-methylguanosine cap binding, exoribonuclease activator activity, m7G(5')pppN diphosphatase activity	-1.37936	-0.70024	0.06078
orf19.6915	ORF19.6915	MRE11	Putative DNA double-strand break repair factor; involved in response to oxidative stress and drug resistance	-1.25645	-0.72717	0.00171
orf19.6915_RC	ORF19.6915	MRE11	Putative DNA double-strand break repair factor; involved in response to oxidative stress and drug resistance	-1.26406	-0.7256	0.00092
orf19.6926	ORF19.6926	CSC25	Guanyl-nucleotide exchange factor; activator of Ras/adenylyl cyclase pathway; functional homolog of S. cerevisiae Cdc25p; commonly called Cdc25; transposon mutation affects filamentous growth	1.54643	0.7389	0.00114
orf19.6926_RC	ORF19.6926	CSC25	Guanyl-nucleotide exchange factor; activator of Ras/adenylyl cyclase pathway; functional homolog of S. cerevisiae Cdc25p; commonly called Cdc25; transposon mutation affects filamentous growth	1.84297	1.07027	0.0011
orf19.6936	ORF19.6936	RAD53	Protein involved in regulation of DNA-damage-induced filamentous growth; putative component of cell cycle checkpoint; ortholog of S. cerevisiae Rad53p, protein kinase required for cell-cycle arrest in response to DNA damage	-1.34597	-1.04899	0.0472
orf19.6936_RC	ORF19.6936	RAD53	Protein involved in regulation of DNA-damage-induced filamentous growth; putative component of cell cycle checkpoint; ortholog of S. cerevisiae Rad53p, protein kinase required for cell-cycle arrest in response to DNA damage	-1.34414	-1.14136	0.01009
orf19.696	ORF19.696	STE2	Receptor for alpha factor mating pheromone, MFalpha; required for a-type cells to respond to alpha factor, for opaque a-form mating and white a-form response; possible Kex2p substrate; a-specific, alpha-factor induced, A1p-Alpha2p repressed	-1.24875	-0.5053	0.10677
orf19.696_RC	ORF19.696	STE2	Receptor for alpha factor mating pheromone, MFalpha; required for a-type cells to respond to alpha factor, for opaque a-form mating and white a-form response; possible Kex2p substrate; a-specific, alpha-factor induced, A1p-Alpha2p repressed	1.27518	0.56005	0.00286
orf19.6980	ORF19.6980	ORF19.6980	Has domain(s) with predicted ATP binding, protein kinase activity, protein tyrosine kinase activity, transferase activity, transferring phosphorus-containing groups activity and role in protein phosphorylation	-1.75745	-1.22107	4.39308e-05
orf19.6980_RC	ORF19.6980	ORF19.6980	Has domain(s) with predicted ATP binding, protein kinase activity, protein tyrosine kinase activity, transferase activity, transferring phosphorus-containing groups activity and role in protein phosphorylation	-2.06298	-1.54402	0.00046
orf19.6987	ORF19.6987	DNM1	Putative dynamin-related GTPase; transcript upregulated inbRHE model of oral candidiasis; transcript regulated by Nrg1, Mig1, and Tup1	-1.61679	-1.02352	0.00139
orf19.6987_RC	ORF19.6987	DNM1	Putative dynamin-related GTPase; transcript upregulated inbRHE model of oral candidiasis; transcript regulated by Nrg1, Mig1, and Tup1	-1.25853	-0.68399	0.00106
orf19.6995	ORF19.6995	ATO6	Putative fungal-specific transmembrane protein	-1.09641	-0.57299	0.00144
orf19.6995_RC	ORF19.6995	ATO6	Putative fungal-specific transmembrane protein	-1.04112	-0.24033	0.08394
orf19.6997	ORF19.6997	ATO5	Putative fungal-specific transmembrane protein	1.12964	1.70648	0.03575
orf19.6997_RC	ORF19.6997	ATO5	Putative fungal-specific transmembrane protein	1.28602	0.79318	0.00067
orf19.7017	ORF19.7017	YOX1	Putative homeodomain-containing transcription factor; transcriptional repressor; periodic mRNA expression, peak at cell-cycle G1/S phase	-1.05388	-0.64066	0.73519
orf19.7017_RC	ORF19.7017	YOX1	Putative homeodomain-containing transcription factor; transcriptional repressor; periodic mRNA expression, peak at cell-cycle G1/S phase	-1.00689	0.41892	0.9976
orf19.702	ORF19.702	ORF19.702	Ortholog(s) have DNA helicase activity, role in regulation of translational termination and polysome localization	1.93799	1.2481	0.00298
orf19.702_RC	ORF19.702	ORF19.702	Ortholog(s) have DNA helicase activity, role in regulation of translational termination and polysome localization	1.66341	0.89062	0.00513
orf19.703	ORF19.703	ORF19.703	Ortholog(s) have 2',3'-cyclic-nucleotide 3'-phosphodiesterase activity, role in cyclic nucleotide metabolic process and clathrin-coated vesicle localization	2.38487	2.26407	0.0033
orf19.703_RC	ORF19.703	ORF19.703	Ortholog(s) have 2',3'-cyclic-nucleotide 3'-phosphodiesterase activity, role in cyclic nucleotide metabolic process and clathrin-coated vesicle localization	1.13225	0.37433	0.0166
orf19.7033	ORF19.7033	ORF19.7033	Putative dual specificity protein phosphatase, similar to S. cerevisiae Pps1p	1.31309	0.45388	0.15654
orf19.7033_RC	ORF19.7033	ORF19.7033	Putative dual specificity protein phosphatase, similar to S. cerevisiae Pps1p	1.54032	0.77257	0.0391
orf19.7044	ORF19.7044	RIM15	Ortholog(s) have protein kinase activity, role in age-dependent response to oxidative stress involved in chronological cell aging, protein phosphorylation, regulation of meiosis and cytosol, nucleus localization	1.97092	1.28205	0.00174
orf19.7044_RC	ORF19.7044	RIM15	Ortholog(s) have protein kinase activity, role in age-dependent response to oxidative stress involved in chronological cell aging, protein phosphorylation, regulation of meiosis and cytosol, nucleus localization	1.60228	0.86484	0.01612
orf19.7081	ORF19.7081	SPL1	Protein similar to S. cerevisiae Spl1p, which is involved in tRNA splicing; member of pyridoxal-phosphate-dependent aminotransferase protein family; predicted to be essential	-1.5466	-0.89436	0.00198
orf19.7081_RC	ORF19.7081	SPL1	Protein similar to S. cerevisiae Spl1p, which is involved in tRNA splicing; member of pyridoxal-phosphate-dependent aminotransferase protein family; predicted to be essential	-1.29761	-0.63186	0.00918
orf19.71	ORF19.71	ORF19.71	Ortholog(s) have role in ER to Golgi vesicle-mediated transport, protein secretion and COPII vesicle coat, Golgi membrane, cell division site, cell tip, cis-Golgi network, cytosol, nucleus localization	-1.04675	-0.2254	0.52933
orf19.71_RC	ORF19.71	ORF19.71	Ortholog(s) have role in ER to Golgi vesicle-mediated transport, protein secretion and COPII vesicle coat, Golgi membrane, cell division site, cell tip, cis-Golgi network, cytosol, nucleus localization	-1.05028	-0.24883	0.5778
orf19.7105	ORF19.7105	FAR1	Protein involved in regulation of pheromone-mediated mating; repressed by A1p and Alpha2p in white-phase cells; null mutant shows no pheromone response in opaque cells; overexpression causes enhanced pheromone response and cell cycle arrest	1.19514	0.27416	0.11214
orf19.7105_RC	ORF19.7105	FAR1	Protein involved in regulation of pheromone-mediated mating; repressed by A1p and Alpha2p in white-phase cells; null mutant shows no pheromone response in opaque cells; overexpression causes enhanced pheromone response and cell cycle arrest	1.30607	0.44442	0.0157
orf19.7114	ORF19.7114	CSA1	Surface antigen on elongating hyphae and buds; strain variation in repeat number; ciclopirox, filament induced, alkaline induced by Rim101; Efg1-, Cph1, Hap43-regulated; required for WT RPMI biofilm formation; Bcr1-induced in a/a biofilms	-1.04951	-0.5441	0.02889
orf19.7114_RC	ORF19.7114	CSA1	Surface antigen on elongating hyphae and buds; strain variation in repeat number; ciclopirox, filament induced, alkaline induced by Rim101; Efg1-, Cph1, Hap43-regulated; required for WT RPMI biofilm formation; Bcr1-induced in a/a biofilms	-1.02065	0.10358	0.10408
orf19.7115	ORF19.7115	SAC7	Putative GTPase activating protein (GAP) for Rho1; repressed upon adherence to polystyrene; macrophage/pseudohyphal-repressed; transcript is upregulated in RHE model of oral candidiasis and in clinical oral candidiasis	-1.13146	-0.32246	0.03655
orf19.7115_RC	ORF19.7115	SAC7	Putative GTPase activating protein (GAP) for Rho1; repressed upon adherence to polystyrene; macrophage/pseudohyphal-repressed; transcript is upregulated in RHE model of oral candidiasis and in clinical oral candidiasis	1.29265	0.42217	0.00364
orf19.7150	ORF19.7150	NRG1	Transcription factor/repressor; regulates chlamydospore formation/hyphal gene induction/virulence and rescue/stress response genes; effects both Tup1 dependent and independent regulation; flow model biofilm induced; Spider biofilm repressed	-2.11274	-1.49611	0.0043
orf19.7150_RC	ORF19.7150	NRG1	Transcription factor/repressor; regulates chlamydospore formation/hyphal gene induction/virulence and rescue/stress response genes; effects both Tup1 dependent and independent regulation; flow model biofilm induced; Spider biofilm repressed	-1.61595	-0.98508	0.02141
orf19.7164	ORF19.7164	ORF19.7164	Ortholog(s) have role in vacuolar protein processing and Golgi apparatus, endoplasmic reticulum, fungal-type vacuole membrane localization	-1.10457	-0.67208	0.01592
orf19.7164_RC	ORF19.7164	ORF19.7164	Ortholog(s) have role in vacuolar protein processing and Golgi apparatus, endoplasmic reticulum, fungal-type vacuole membrane localization	1.14461	0.51813	0.0779
orf19.718	ORF19.718	RRN11	Putative RNA polymerase I subunit; rat catheter biofilm induced; Spider biofilm induced	-1.50153	-0.84366	0.00588
orf19.718_RC	ORF19.718	RRN11	Putative RNA polymerase I subunit; rat catheter biofilm induced; Spider biofilm induced	-1.20291	-0.46814	0.00431
orf19.719	ORF19.719	ORF19.719	Ortholog(s) have ubiquitin-protein ligase activity and role in ER-associated protein catabolic process, fungal-type cell wall organization, negative regulation of transcription by transcription factor catabolism, protein ubiquitination	-1.10437	-0.30023	0.17143
orf19.719_RC	ORF19.719	ORF19.719	Ortholog(s) have ubiquitin-protein ligase activity and role in ER-associated protein catabolic process, fungal-type cell wall organization, negative regulation of transcription by transcription factor catabolism, protein ubiquitination	-1.06044	-0.25253	0.14977
orf19.7195	ORF19.7195	RAD6	Functional ortholog of S. cerevisiae Rad6; negative regulator of hyphal growth; required for wild-type UV resistance; acts in pathway with Efg1; ; transcript is UV-induced, slightly repressed during hyphal growth; gene has two introns	-1.01841	-0.11441	0.75434
orf19.7195_RC	ORF19.7195	RAD6	Functional ortholog of S. cerevisiae Rad6; negative regulator of hyphal growth; required for wild-type UV resistance; acts in pathway with Efg1; ; transcript is UV-induced, slightly repressed during hyphal growth; gene has two introns	1.01035	0.69642	0.33202
orf19.7208	ORF19.7208	CSK1	Putative mitogen-activated protein (MAP) kinase with an unknown role; null mutant produces wrinkled colonies; similar to S. cerevisiae Smk1p, which is a protein kinase required for sporulation	-2.24233	-1.6719	0.00435
orf19.7208_RC	ORF19.7208	CSK1	Putative mitogen-activated protein (MAP) kinase with an unknown role; null mutant produces wrinkled colonies; similar to S. cerevisiae Smk1p, which is a protein kinase required for sporulation	-1.43761	-1.04637	0.00191
orf19.7227	ORF19.7227	ORF19.7227	Protein phosphatase inhibitor; Hap43-repressed; homozygous Tn insertion decreases colony wrinkling but does not block hyphal growth in liquid media; mutation confers hypersensitivity to toxic ergosterol analog; Spider biofilm induced	-1.03711	-0.26794	0.77375
orf19.7227_RC	ORF19.7227	ORF19.7227	Protein phosphatase inhibitor; Hap43-repressed; homozygous Tn insertion decreases colony wrinkling but does not block hyphal growth in liquid media; mutation confers hypersensitivity to toxic ergosterol analog; Spider biofilm induced	1.01233	0.8634	0.61053
orf19.723	ORF19.723	BCR1	Transcription factor; regulates a/alpha biofilm formation, matrix, cell-surface-associated genes; confers adherence, impermeability, impenetrability, fluconazole resistance; Tup1/Tec1/Mnl1-regulated; mRNA binds She3; Spider biofilm induced	1.07975	0.07706	0.87705
orf19.723_RC	ORF19.723	BCR1	Transcription factor; regulates a/alpha biofilm formation, matrix, cell-surface-associated genes; confers adherence, impermeability, impenetrability, fluconazole resistance; Tup1/Tec1/Mnl1-regulated; mRNA binds She3; Spider biofilm induced	-1.09698	-0.25401	0.55712
orf19.7234	ORF19.7234	ORF19.7234	Putative RSC chromatin remodeling complex component; possibly an essential gene, disruptants not obtained by UAU1 method	-1.01129	-0.10762	0.17301
orf19.7234_RC	ORF19.7234	ORF19.7234	Putative RSC chromatin remodeling complex component; possibly an essential gene, disruptants not obtained by UAU1 method	-1.20064	-0.45341	0.00075
orf19.7250	ORF19.7250	ORF19.7250	Protein of unknown function; rat catheter and Spider biofilm induced	-1.53565	-0.89556	0.00074
orf19.7250_RC	ORF19.7250	ORF19.7250	Protein of unknown function; rat catheter and Spider biofilm induced	-1.30355	-0.62515	0.00073
orf19.7251	ORF19.7251	WSC4	Putative cell wall integrity and stress response subunit 4 precursor; transcription is specific to white cell type	1.52643	0.87886	0.00078
orf19.7251_RC	ORF19.7251	WSC4	Putative cell wall integrity and stress response subunit 4 precursor; transcription is specific to white cell type	1.38065	0.74108	0.00636
orf19.7257	ORF19.7257	MLH3	Ortholog(s) have role in mismatch repair, reciprocal meiotic recombination and MutLbeta complex localization	-1.03327	-0.26155	0.26205
orf19.7257_RC	ORF19.7257	MLH3	Ortholog(s) have role in mismatch repair, reciprocal meiotic recombination and MutLbeta complex localization	-1.02798	-0.17804	0.6932
orf19.726	ORF19.726	PPZ1	Protein phosphatase Z; type 1 family serine/threonine specific protein phosphatase involved in cation homeostasis and cell wall integrity	1.2073	0.3478	0.62624
orf19.726_RC	ORF19.726	PPZ1	Protein phosphatase Z; type 1 family serine/threonine specific protein phosphatase involved in cation homeostasis and cell wall integrity	1.42661	0.66786	0.08418
orf19.7281	ORF19.7281	PDK2	Putative pyruvate dehydrogenase kinase; mutation confers hypersensitivity to amphotericin B	-1.18201	-0.4219	0.00295
orf19.7281_RC	ORF19.7281	PDK2	Putative pyruvate dehydrogenase kinase; mutation confers hypersensitivity to amphotericin B	-1.26835	-0.56395	0.00077
orf19.7308	ORF19.7308	TUB1	Alpha-tubulin; gene has intron; complements cold-sensitivity of S. cerevisiae tub1 mutant; C. albicans has single alpha-tubulin gene, whereas S. cerevisiae has two (TUB1, TUB3); farnesol-upregulated in biofilm; sumoylation target	-1.01219	0.19483	0.37953
orf19.7308_RC	ORF19.7308	TUB1	Alpha-tubulin; gene has intron; complements cold-sensitivity of S. cerevisiae tub1 mutant; C. albicans has single alpha-tubulin gene, whereas S. cerevisiae has two (TUB1, TUB3); farnesol-upregulated in biofilm; sumoylation target	-1.04464	-0.40287	0.12739
orf19.7310	ORF19.7310	ORF19.7310	Protein with a role in directing meiotic recombination events to homologous chromatids; induced by ciclopirox olamine; positively regulated by Sfu1; Hog1, fluconazole-repressed; Hap43-induced; Spider biofilm induced	-1.04674	-0.4828	0.09108
orf19.7310_RC	ORF19.7310	ORF19.7310	Protein with a role in directing meiotic recombination events to homologous chromatids; induced by ciclopirox olamine; positively regulated by Sfu1; Hog1, fluconazole-repressed; Hap43-induced; Spider biofilm induced	-1.00431	0.28768	0.39139
orf19.7317	ORF19.7317	UGA33	Zinc-finger transcription factor; similar to S. cerevisiae Uga3 which regulates gamma-aminobutyrate metabolism gene expression; required for yeast cell adherence to silicone substrate; rat catheter biofilm induced	-1.30638	-0.62347	0.01097
orf19.7317_RC	ORF19.7317	UGA33	Zinc-finger transcription factor; similar to S. cerevisiae Uga3 which regulates gamma-aminobutyrate metabolism gene expression; required for yeast cell adherence to silicone substrate; rat catheter biofilm induced	-1.2777	-0.55723	0.00261
orf19.7319	ORF19.7319	SUC1	Zinc-finger transcription factor; regulates alpha-glucosidase exression; complements S. cerevisiae suc2 for sucrose utilization and mal13 maltase defect; required for yeast cell adherence to silicone substrate; rat catheter biofilm induced	-1.20957	-0.64446	0.01627
orf19.7319_RC	ORF19.7319	SUC1	Zinc-finger transcription factor; regulates alpha-glucosidase exression; complements S. cerevisiae suc2 for sucrose utilization and mal13 maltase defect; required for yeast cell adherence to silicone substrate; rat catheter biofilm induced	1.10065	0.16114	0.09267
orf19.7355	ORF19.7355	SSN8	Ortholog of S. cerevisiae Ssn8; a component of RNA polymerase II holoenzyme; mutants are viable and are sensitive to hydrogen peroxide medium	1.22269	0.60105	0.02317
orf19.7355_RC	ORF19.7355	SSN8	Ortholog of S. cerevisiae Ssn8; a component of RNA polymerase II holoenzyme; mutants are viable and are sensitive to hydrogen peroxide medium	1.17241	0.49617	0.08058
orf19.7359	ORF19.7359	CRZ1	Calcineurin-regulated C2H2 transcription factor; role in maintenance of membrane integrity, azole tolerance; not required for mouse virulence; repressed by low iron; regulates Ca++ influx during alkaline pH response; Spider biofilm induced	-1.1586	-0.37727	0.36355
orf19.7359_RC	ORF19.7359	CRZ1	Calcineurin-regulated C2H2 transcription factor; role in maintenance of membrane integrity, azole tolerance; not required for mouse virulence; repressed by low iron; regulates Ca++ influx during alkaline pH response; Spider biofilm induced	-1.45841	-0.81195	0.04806
orf19.7372	ORF19.7372	MRR1	Putative Zn(II)2Cys6 transcription factor; regulator of MDR1 transcription; gain-of-function mutations cause upregulation of MDR1 (a plasma membrane multidrug efflux pump) and multidrug resistance; Hap43-induced	1.91899	1.22826	0.00295
orf19.7372_RC	ORF19.7372	MRR1	Putative Zn(II)2Cys6 transcription factor; regulator of MDR1 transcription; gain-of-function mutations cause upregulation of MDR1 (a plasma membrane multidrug efflux pump) and multidrug resistance; Hap43-induced	1.50499	0.73862	0.01173
orf19.7374	ORF19.7374	CTA4	Zn(II)2Cys6 transcription factor; induced by nitric oxide; induced by Mnl1 under weak acid stress; repressed upon adherence to polystyrene; Hap43-repressed; Spider biofilm induced	-1.07538	-0.183	0.21199
orf19.7374_RC	ORF19.7374	CTA4	Zn(II)2Cys6 transcription factor; induced by nitric oxide; induced by Mnl1 under weak acid stress; repressed upon adherence to polystyrene; Hap43-repressed; Spider biofilm induced	-1.0701	-0.2215	0.03342
orf19.7385	ORF19.7385	ORF19.7385	CCCH zinc finger protein; Spider biofilm induced	1.44669	0.65902	0.03901
orf19.7385_RC	ORF19.7385	ORF19.7385	CCCH zinc finger protein; Spider biofilm induced	1.79377	1.31749	0.0095
orf19.7388	ORF19.7388	PBS2	MAPK kinase (MAPKK); role in osmotic and oxidative stress responses, oxidative stress adaptation; required for stress regulation of Hog1p localization and activity; functional homolog of S. cerevisiae Pbs2p	-1.07217	-0.92839	0.41727
orf19.7388_RC	ORF19.7388	PBS2	MAPK kinase (MAPKK); role in osmotic and oxidative stress responses, oxidative stress adaptation; required for stress regulation of Hog1p localization and activity; functional homolog of S. cerevisiae Pbs2p	-1.02571	-0.01127	0.33267
orf19.7402	ORF19.7402	DOT1	Putative modulator of white-opaque switching	1.40116	0.95477	0.07396
orf19.7402_RC	ORF19.7402	DOT1	Putative modulator of white-opaque switching	1.06273	0.20208	0.52328
orf19.7414	ORF19.7414	ALS6	ALS family protein; expression in S. cerevisiae confers adhesion to gelatin; macrophage-induced gene; N-terminal adhesion domain; ALS family includes cell-surface glycoproteins, some with adhesin function	1.07591	0.06241	0.31661
orf19.7414_RC	ORF19.7414	ALS6	ALS family protein; expression in S. cerevisiae confers adhesion to gelatin; macrophage-induced gene; N-terminal adhesion domain; ALS family includes cell-surface glycoproteins, some with adhesin function	1.51387	0.75048	0.00482
orf19.7417	ORF19.7417	TSA1	TSA/alkyl hydroperoxide peroxidase C (AhPC) family protein; similar to thiol-dependent peroxidases of oxidative stress signaling; antigenic; hyphal surface, nucleus; yeast-form nucleus, cytoplasm; biofilm, phagocytosis, peroxide induced	-1.1265	-0.28081	0.04912
orf19.7417_RC	ORF19.7417	TSA1	TSA/alkyl hydroperoxide peroxidase C (AhPC) family protein; similar to thiol-dependent peroxidases of oxidative stress signaling; antigenic; hyphal surface, nucleus; yeast-form nucleus, cytoplasm; biofilm, phagocytosis, peroxide induced	-1.03942	-0.21146	0.39357
orf19.744	ORF19.744	GDB1	Putative glycogen debranching enzyme; expression is regulated upon white-opaque switch; regulated by Nrg1, Tup1; rat catheter biofilm repressed	2.0933	1.33766	0.00736
orf19.744_RC	ORF19.744	GDB1	Putative glycogen debranching enzyme; expression is regulated upon white-opaque switch; regulated by Nrg1, Tup1; rat catheter biofilm repressed	2.01198	1.23339	0.01864
orf19.7451	ORF19.7451	FUN31	Putative PAS kinase involved in cell wall damage response; similar to S. cerevisiae Psk1p, a putative serine/threonine protein kinase; induced by Mnl1 under weak acid stress; rat catheter and Spider biofilm induced	1.13825	0.17591	0.73498
orf19.7451_RC	ORF19.7451	FUN31	Putative PAS kinase involved in cell wall damage response; similar to S. cerevisiae Psk1p, a putative serine/threonine protein kinase; induced by Mnl1 under weak acid stress; rat catheter and Spider biofilm induced	1.40678	0.60266	0.05446
orf19.7472	ORF19.7472	IFF4	Adhesin-like cell surface protein; putative GPI-anchor; null mutant germ tubes show decreased adhesion to plastic substrate; mutants are viable; Hap43-repressed gene	1.55595	0.8089	0.01954
orf19.7472_RC	ORF19.7472	IFF4	Adhesin-like cell surface protein; putative GPI-anchor; null mutant germ tubes show decreased adhesion to plastic substrate; mutants are viable; Hap43-repressed gene	1.63822	0.90953	0.01798
orf19.7473	ORF19.7473	ORF19.7473	Ortholog(s) have role in endocytosis and actin cortical patch, cellular bud neck, cytoplasm localization	-1.0448	-0.33712	0.90045
orf19.7473_RC	ORF19.7473	ORF19.7473	Ortholog(s) have role in endocytosis and actin cortical patch, cellular bud neck, cytoplasm localization	-1.02384	-0.14856	0.91412
orf19.7504	ORF19.7504	ORF19.7504	Ortholog of S. cerevisiae Rts3; a component of the protein phosphatase type 2A complex; Plc1-regulated; induced in core caspofungin response; Spider biofilm induced	-2.00171	-1.40173	0.00251
orf19.7504_RC	ORF19.7504	ORF19.7504	Ortholog of S. cerevisiae Rts3; a component of the protein phosphatase type 2A complex; Plc1-regulated; induced in core caspofungin response; Spider biofilm induced	-1.8048	-1.20949	0.00217
orf19.7510	ORF19.7510	KIN2	Protein with similarity to S. cerevisiae Kin2p, transcription is positively regulated by Tbf1	-1.23148	-0.50451	0.22053
orf19.7510_RC	ORF19.7510	KIN2	Protein with similarity to S. cerevisiae Kin2p, transcription is positively regulated by Tbf1	-1.02971	-0.14399	0.57708
orf19.7518	ORF19.7518	ZCF38	Putative Zn(II)2Cys6 transcription factor	-1.25803	-0.65996	0.00014
orf19.7518_RC	ORF19.7518	ZCF38	Putative Zn(II)2Cys6 transcription factor	-1.34664	-0.63685	0.00162
orf19.7547	ORF19.7547	ORF19.7547	Ortholog(s) have phosphatidylinositol-3-phosphate binding, ubiquitin-protein ligase activity, role in protein ubiquitination and cytosol, fungal-type vacuole membrane, late endosome, nucleus localization	-1.04212	-0.36278	0.61677
orf19.7547_RC	ORF19.7547	ORF19.7547	Ortholog(s) have phosphatidylinositol-3-phosphate binding, ubiquitin-protein ligase activity, role in protein ubiquitination and cytosol, fungal-type vacuole membrane, late endosome, nucleus localization	-1.0102	0.34271	0.49777
orf19.7570	ORF19.7570	UGA3	Zn(II)2Cys6 transcription factor; required for utilization of gamma-aminobutyrate (GABA) as a nitrogen source; mutants display decreased CFU in mouse kidneys; Spider biofilm induced	-1.45768	-0.84427	0.00054
orf19.7570_RC	ORF19.7570	UGA3	Zn(II)2Cys6 transcription factor; required for utilization of gamma-aminobutyrate (GABA) as a nitrogen source; mutants display decreased CFU in mouse kidneys; Spider biofilm induced	-1.70911	-1.16488	0.00277
orf19.7583	ORF19.7583	ZCF39	Zn(II)2Cys6 transcription factor; mutants are viable; filament induced; required for yeast cell adherence to silicone substrate; Spider biofilm induced	-1.40316	-1.00206	0.00097
orf19.7583_RC	ORF19.7583	ZCF39	Zn(II)2Cys6 transcription factor; mutants are viable; filament induced; required for yeast cell adherence to silicone substrate; Spider biofilm induced	-1.0802	-0.29057	0.17016
orf19.7617	ORF19.7617	ORF19.7617	Ortholog(s) have peptide alpha-N-acetyltransferase activity, role in N-terminal protein amino acid acetylation, histone acetylation and NatA complex, cytosol, cytosolic ribosome, nucleus localization	-1.17698	-0.93782	0.00183
orf19.7617_RC	ORF19.7617	ORF19.7617	Ortholog(s) have peptide alpha-N-acetyltransferase activity, role in N-terminal protein amino acid acetylation, histone acetylation and NatA complex, cytosol, cytosolic ribosome, nucleus localization	-1.10816	-0.6561	0.13069
orf19.7625	ORF19.7625	PGA1	Putative GPI-anchored protein; induced during cell wall regeneration; required for normal adhesion to host cells and for adherence during Sabouraud biofilm formation; Spider biofilm induced	2.16247	1.37018	0.00487
orf19.7625_RC	ORF19.7625	PGA1	Putative GPI-anchored protein; induced during cell wall regeneration; required for normal adhesion to host cells and for adherence during Sabouraud biofilm formation; Spider biofilm induced	2.12837	1.39756	0.01116
orf19.7644	ORF19.7644	ORF19.7644	Ortholog(s) have ubiquitin-protein ligase activity, role in anaphase-promoting complex-dependent proteasomal ubiquitin-dependent protein catabolic process, protein ubiquitination and anaphase-promoting complex localization	-1.10908	-0.3624	0.12769
orf19.7644_RC	ORF19.7644	ORF19.7644	Ortholog(s) have ubiquitin-protein ligase activity, role in anaphase-promoting complex-dependent proteasomal ubiquitin-dependent protein catabolic process, protein ubiquitination and anaphase-promoting complex localization	1.11104	0.18527	0.15259
orf19.7652	ORF19.7652	CKA1	Putative alpha subunit (catalytic subunit) of protein kinase CK2; Cka1p and Cka2p have a common target with respect to fluconazole resistance; synthetically lethal with CKA2; flucytosine induced	-1.58977	-0.96759	0.00335
orf19.7652_RC	ORF19.7652	CKA1	Putative alpha subunit (catalytic subunit) of protein kinase CK2; Cka1p and Cka2p have a common target with respect to fluconazole resistance; synthetically lethal with CKA2; flucytosine induced	-1.72461	-1.13263	0.00223
orf19.7663	ORF19.7663	ORF19.7663	Ortholog(s) have role in homologous chromosome segregation, protein localization to nucleolar rDNA repeats, rDNA condensation and monopolin complex, nuclear envelope, nucleolus localization	-1.16414	-0.57876	0.27979
orf19.7663_RC	ORF19.7663	ORF19.7663	Ortholog(s) have role in homologous chromosome segregation, protein localization to nucleolar rDNA repeats, rDNA condensation and monopolin complex, nuclear envelope, nucleolus localization	-1.09186	-0.37331	0.46664
orf19.791	ORF19.791	RIM11	Ortholog of S. cerevisiae Rim11; a protein kinase involved in meiosis and sporulation in S. cerevisiae; mutant is viable	-1.02725	-0.07349	0.86419
orf19.791_RC	ORF19.791	RIM11	Ortholog of S. cerevisiae Rim11; a protein kinase involved in meiosis and sporulation in S. cerevisiae; mutant is viable	-1.02262	-0.1223	0.18687
orf19.793	ORF19.793	CAK1	Monomeric CDK-activating kinase; functional homolog of S. cerevisiae Cak1p; phosphorylates cyclin-free human CDK2; lacks glycine loop motif; conserved lysine (K36) not required for activity; possibly essential gene (by UAU1 method)	-1.12476	-0.33221	0.11175
orf19.793_RC	ORF19.793	CAK1	Monomeric CDK-activating kinase; functional homolog of S. cerevisiae Cak1p; phosphorylates cyclin-free human CDK2; lacks glycine loop motif; conserved lysine (K36) not required for activity; possibly essential gene (by UAU1 method)	-1.03565	-0.18863	0.8353
orf19.794	ORF19.794	SSN3	Putative cyclin-dependent protein kinase; mutants are sensitive to growth on H2O2 medium	-2.02276	-1.50436	0.00177
orf19.794_RC	ORF19.794	SSN3	Putative cyclin-dependent protein kinase; mutants are sensitive to growth on H2O2 medium	-1.82694	-1.23222	0.00353
orf19.799	ORF19.799	STE4	Beta subunit of heterotrimeric G protein of mating signal transduction pathway; required for mating; transcript is specific to cells homozygous at MTL; induced by alpha pheromone; ortholog of S. cerevisiae Ste4	1.00573	-0.06864	0.51736
orf19.799_RC	ORF19.799	STE4	Beta subunit of heterotrimeric G protein of mating signal transduction pathway; required for mating; transcript is specific to cells homozygous at MTL; induced by alpha pheromone; ortholog of S. cerevisiae Ste4	1.16123	0.3029	0.01974
orf19.829	ORF19.829	SCH9	Protein kinase; involved in growth control, cell size, resistance to rapamycin, cations, chlamydospore formation, filamentous growth under some conditions, and virulence; prevents hyphal growth in hypoxia at high CO2; Spider biofilm induced	-1.35779	-0.66022	0.00097
orf19.829_RC	ORF19.829	SCH9	Protein kinase; involved in growth control, cell size, resistance to rapamycin, cations, chlamydospore formation, filamentous growth under some conditions, and virulence; prevents hyphal growth in hypoxia at high CO2; Spider biofilm induced	-1.13421	-0.35714	0.25972
orf19.843	ORF19.843	ORF19.843	Putative DNA repair exonuclease; fungal-specific (no human or murine homolog)	-1.14606	-0.35968	0.00175
orf19.843_RC	ORF19.843	ORF19.843	Putative DNA repair exonuclease; fungal-specific (no human or murine homolog)	-1.74748	-1.19268	0.00249
orf19.844	ORF19.844	STE11	Protein similar to S. cerevisiae Ste11p; mutants are sensitive to growth on H2O2 medium	-1.51503	-0.92202	0.00025
orf19.844_RC	ORF19.844	STE11	Protein similar to S. cerevisiae Ste11p; mutants are sensitive to growth on H2O2 medium	-1.44268	-0.85284	0.00152
orf19.848	ORF19.848	PGA16	Putative GPI-anchored protein	1.37806	0.55117	0.00404
orf19.848_RC	ORF19.848	PGA16	Putative GPI-anchored protein	1.53186	0.76939	0.00813
orf19.861	ORF19.861	CAP4	Predicted bZip transcription factor; possibly an essential gene, disruptants not obtained by UAU1 method	-1.32418	-0.83684	0.00161
orf19.861_RC	ORF19.861	CAP4	Predicted bZip transcription factor; possibly an essential gene, disruptants not obtained by UAU1 method	-1.29821	-0.8151	0.00382
orf19.876	ORF19.876	PGA33	Putative GPI-anchored protein of unknown function; Spider biofilm repressed	-1.01355	-0.11271	0.85793
orf19.876_RC	ORF19.876	PGA33	Putative GPI-anchored protein of unknown function; Spider biofilm repressed	1.22904	0.33052	0.16254
orf19.878	ORF19.878	NBN1	Subunit of the NuA4 histone acetyltransferase complex; Plc1p-regulated	-1.96779	-1.39367	0.00064
orf19.878_RC	ORF19.878	NBN1	Subunit of the NuA4 histone acetyltransferase complex; Plc1p-regulated	-1.37834	-0.75865	0.00041
orf19.889	ORF19.889	THI20	Putative trifunctional enzyme of thiamine biosynthesis, degradation and salvage; Spider biofilm induced	-1.00479	0.4675	0.23215
orf19.889_RC	ORF19.889	THI20	Putative trifunctional enzyme of thiamine biosynthesis, degradation and salvage; Spider biofilm induced	-1.02685	-0.03706	0.52295
orf19.895	ORF19.895	HOG1	MAP kinase of osmotic-, heavy metal-, and core stress response; role in regulation of glycerol, D-arabitol in response to stress; phosphorylated in response to H2O2 (Ssk1-dependent) or NaCl; mutant induces protective mouse immune response	-3.50015	-2.53152	0.0038
orf19.895_RC	ORF19.895	HOG1	MAP kinase of osmotic-, heavy metal-, and core stress response; role in regulation of glycerol, D-arabitol in response to stress; phosphorylated in response to H2O2 (Ssk1-dependent) or NaCl; mutant induces protective mouse immune response	-2.11924	-1.59824	0.00376
orf19.921	ORF19.921	HMS1	hLh domain Myc-type transcript factor; required for morphogenesis induced by elevated temperature or Hsp90 compromise; acts downstream of Pcl1; Spider biofilm induced	-1.66524	-1.44507	0.0031
orf19.921_RC	ORF19.921	HMS1	hLh domain Myc-type transcript factor; required for morphogenesis induced by elevated temperature or Hsp90 compromise; acts downstream of Pcl1; Spider biofilm induced	-1.49904	-1.34691	0.00269
orf19.940	ORF19.940	BUD2	GTPase activating protein (GAP) for Rsr1; negative regulator of filament branching, acts in hyphal growth guidance; required for wild-type budding pattern; induced in low iron; regulated by tyrosol and cell density	2.37088	1.64037	0.00559
orf19.940_RC	ORF19.940	BUD2	GTPase activating protein (GAP) for Rsr1; negative regulator of filament branching, acts in hyphal growth guidance; required for wild-type budding pattern; induced in low iron; regulated by tyrosol and cell density	2.18835	1.4082	0.00824
orf19.967	ORF19.967	ORF19.967	Major mitochondrial nuclease; has RNAse and DNA endo- and exonucleolytic activities; roles in mitochondrial recombination, apoptosis and maintenance of polyploidy; Spider biofilm repressed	1.1323	0.3037	0.52051
orf19.967_RC	ORF19.967	ORF19.967	Major mitochondrial nuclease; has RNAse and DNA endo- and exonucleolytic activities; roles in mitochondrial recombination, apoptosis and maintenance of polyploidy; Spider biofilm repressed	1.02775	0.02849	0.48235
orf19.971	ORF19.971	SKN7	Putative homolog of S. cerevisiae Skn7p, which is predicted to be a response regulator protein in a phosphorelay signal transduction pathway; required for normal hydrogen peroxide resistance	-1.85296	-1.3277	0.00295
orf19.971_RC	ORF19.971	SKN7	Putative homolog of S. cerevisiae Skn7p, which is predicted to be a response regulator protein in a phosphorelay signal transduction pathway; required for normal hydrogen peroxide resistance	-2.45185	-1.79249	0.00164
orf19.976	ORF19.976	BRE1	Putative transcription factor with C3HC4 zinc finger DNA-binding motif; similar to S. cerevisiae Bre1p; transposon mutation affects filamentous growth	1.64792	1.38192	0.00394
orf19.976_RC	ORF19.976	BRE1	Putative transcription factor with C3HC4 zinc finger DNA-binding motif; similar to S. cerevisiae Bre1p; transposon mutation affects filamentous growth	1.71655	1.42589	0.00185
orf19.996	ORF19.996	ORF19.996	Protein with a predicted leucine-rich repeat domain; possibly an essential gene, disruptants not obtained by UAU1 method	2.48041	2.54553	0.00034
orf19.996_RC	ORF19.996	ORF19.996	Protein with a predicted leucine-rich repeat domain; possibly an essential gene, disruptants not obtained by UAU1 method	1.35741	1.20692	0.00179
PIKalpha	ORF19.10711	PIKALPHA		-1.04127	-0.36099	0.20083
PIKalpha_RC	ORF19.10711	PIKALPHA		1.32305	0.88829	0.01073

## Sheet: GeneSpring analysis-hits p<0.05
ID	orf19 #	Gene name	Description	Fold change	p-value (p<0,05)
orf19.3174	orf19.3174	CDC24	GDP-GTP exchange factor for Cdc42p; phosphorylated; required for maintenance of hyphal growth; misexpression blocks hyphal growth and causes avirulence in a mouse model of systemic infection; antigenic during human oral infection	4.81531	0.00192695
orf19.2033	orf19.2033	PGA19	Putative GPI-anchored protein; not essential for viability; macrophage-induced gene	4.095	0.000831718
orf19.3174_RC	orf19.3174	CDC24	GDP-GTP exchange factor for Cdc42p; phosphorylated; required for maintenance of hyphal growth; misexpression blocks hyphal growth and causes avirulence in a mouse model of systemic infection; antigenic during human oral infection	4.03378	0.00185446
orf19.2033_RC	orf19.2033	PGA19	Putative GPI-anchored protein; not essential for viability; macrophage-induced gene	3.87707	0.00176478
orf19.4518_RC	orf19.4518		Protein not essential for viability	3.74975	0.00459854
orf19.2878_RC	orf19.2878	PGA15	Putative GPI-anchored protein	3.46693	0.00294029
orf19.5954	orf19.5954		Ortholog(s) have enzyme activator activity, role in ascospore wall assembly, meiosis I, positive regulation of protein catabolic process and anaphase-promoting complex localization	3.45365	0.00884857
orf19.5954_RC	orf19.5954		Ortholog(s) have enzyme activator activity, role in ascospore wall assembly, meiosis I, positive regulation of protein catabolic process and anaphase-promoting complex localization	3.27605	0.00672458
orf19.1490_RC	orf19.1490	MSB2	Adhesin-like protein; mucin family; cell wall damage sensor; N-terminal secretion signal; required for Cek1p phosphorylation in response to cell wall stress; Rim101p-repressed; activation releases extracellular domain into medium	3.22619	0.00627341
orf19.3459_RC	orf19.3459		Putative serine/threonine/tyrosine (dual-specificity) kinase; disruptants not obtained by UAU1 method	3.12158	0.0120442
orf19.2767_RC	orf19.2767	PGA59	Adhesin-like cell wall protein; putative GPI-anchor; shows colony morphology-related gene regulation by Ssn6p; Hap43p-induced gene	3.10675	2.84269e-06
orf19.2878	orf19.2878	PGA15	Putative GPI-anchored protein	3.07085	0.00225151
orf19.996	orf19.996		Predicted ORF in Assemblies 19, 20 and 21; possibly an essential gene, disruptants not obtained by UAU1 method	3.07067	0.000840559
orf19.2767	orf19.2767	PGA59	Adhesin-like cell wall protein; putative GPI-anchor; shows colony morphology-related gene regulation by Ssn6p; Hap43p-induced gene	2.98804	1.17591e-05
orf19.4295_RC	orf19.4295		Ortholog(s) have DNA binding, nucleosome binding, transcription corepressor activity	2.90189	0.00107175
orf19.1105.2_RC	orf19.1105.2	PGA56	Regulator of sorbose utilization; putative GPI-anchor; predicted helix-loop helix domain; hyphal induced; induced during cell wall regeneration; colony morphology-related gene regulation by Ssn6p; transcription activated by Tbf1p, Hap43p	2.89507	0.00400265
orf19.1490	orf19.1490	MSB2	Adhesin-like protein; mucin family; cell wall damage sensor; N-terminal secretion signal; required for Cek1p phosphorylation in response to cell wall stress; Rim101p-repressed; activation releases extracellular domain into medium	2.86598	0.00404378
orf19.4518	orf19.4518		Protein not essential for viability	2.81728	0.00346493
orf19.3459	orf19.3459		Putative serine/threonine/tyrosine (dual-specificity) kinase; disruptants not obtained by UAU1 method	2.6731	0.00908242
orf19.3738	orf19.3738	PGA22	Putative GPI-anchored protein; adhesin-like protein	2.58196	0.00563381
orf19.2906	orf19.2906	PGA41	Putative GPI-anchored protein; adhesin-like protein	2.50287	0.0240892
orf19.2534	orf19.2534	PIN4	Protein with similarity to S. cerevisiae Pin4p; transposon mutation affects filamentous growth	2.49149	0.0209573
orf19.6784	orf19.6784	PGA32	Putative GPI-anchored adhesin-like protein; transcriptionally regulated by iron; expression greater in high iron	2.44966	0.00529878
orf19.703	orf19.703		Ortholog(s) have 2',3'-cyclic-nucleotide 3'-phosphodiesterase activity, role in cyclic nucleotide metabolic process and clathrin-coated vesicle localization	2.43148	0.00338115
orf19.4242	orf19.4242	CST20	Protein kinase of Ste20p/p65PAK family, required for wild-type mating efficiency and virulence in a mouse model; Cst20p-Hst7p-Cek1p-Cph1p MAPK pathway regulates some hyphal growth; involved in Cdc42p growth regulation	2.39076	7.21023e-05
orf19.5102_RC	orf19.5102	PLB5	Putative GPI-linked phospholipase B, fungal-specific (no mammalian homolog); null mutation eliminates cell-associated phospholipase A2 activity and attenuates virulence; fluconazole-repressed	2.3525	0.00282863
orf19.5760	orf19.5760	IHD1	Putative GPI-anchored protein; alkaline upregulated; greater transcription in hyphal form than yeast form; regulated by Nrg1p, Rfg1p, Tup1p; regulated by Tsa1p, Tsa1Bp in minimal media at 37; induced in oralpharyngeal candidasis	2.33899	0.00069173
orf19.5144_RC	orf19.5144	PGA28	Protein similar to S. cerevisiae Wsc2p, which has roles in stress- and cell-wall-related processes; predicted Kex2p substrate; putative GPI-anchored adhesin-like protein	2.32628	0.0105194
orf19.6784_RC	orf19.6784	PGA32	Putative GPI-anchored adhesin-like protein; transcriptionally regulated by iron; expression greater in high iron	2.31264	0.00539076
orf19.2044_RC	orf19.2044	PGA27	Putative GPI-anchored protein	2.26074	0.000815896
orf19.2771_RC	orf19.2771	BEM3	Putative GTPase-activating protein (GAP) for Rho-type GTPase Cdc42p; involved in cell signaling pathways that control cell polarity; similar to S. cerevisiae Bem3p	2.23558	0.00016835
orf19.59_RC	orf19.59	REI1	Putative cytoplasmic pre-60S factor; Hap43p-induced gene; decreased expression in response to prostaglandins	2.23062	0.00194896
orf19.5276	orf19.5276		Putative nuclear pore-associated protein; Hap43p-induced gene; induced upon low-level peroxide stress; possibly an essential gene, disruptants not obtained by UAU1 method	2.22979	0.00847236
orf19.7625_RC	orf19.7625	PGA1	Putative GPI-anchored protein; induced during cell wall regeneration; required for normal adhesion to host cells and for adherence during biofilm formation	2.21221	0.0100695
orf19.2907_RC	orf19.2907	PGA42	Putative GPI-anchored adhesin-like protein; decreased transcription is observed in azole-resistant strains that overexpress CDR1 and CDR2 or MDR1	2.21135	0.00324978
orf19.220	orf19.220	PIR1	1,3-beta-glucan-linked structural cell wall protein; N-mannosylated, O-glycosylated by Pmt1p; tandem repeats; cell wall defect in heterozygous mutant; hyphal repressed; Hog1p, fluconazole, hypoxia induced; iron, Efg1p, Plc1p, temp regulated	2.18691	0.00179999
orf19.3923	orf19.3923	PGA37	Putative GPI-anchored protein; Hap43p-repressed gene	2.17931	9.49829e-05
orf19.3738_RC	orf19.3738	PGA22	Putative GPI-anchored protein; adhesin-like protein	2.16207	0.0133204
orf19.6081	orf19.6081	PHR2	Glycosidase; role in cell wall structure; may act on beta-1,3-glucan prior to beta-1,6-glucan linkage; role in vaginal not systemic virulence (low pH not neutral); low pH, high iron, fluconazole, Hap43p-induced; Rim101p-downregulated at pH8	2.1309	0.000616736
orf19.2833_RC	orf19.2833	PGA34	Putative GPI-anchored protein; transcription is repressed in response to alpha pheromone in SpiderM medium; late-stage biofilm-induced gene; induced in oralpharyngeal candidasis	2.10004	0.00431862
orf19.4361	orf19.4361	IFF3	Putative GPI-anchored protein	2.0924	0.0118213
orf19.1259_RC	orf19.1259		Ortholog(s) have DNA binding activity and Lid2 complex, Snt2C complex, spindle pole body localization	2.08814	0.00378894
orf19.6573	orf19.6573	BEM2	Putative Rho1p GTPase activating protein (GAP); serum-induced transcription	2.08022	0.00196622
orf19.3188	orf19.3188	TAC1	Transcriptional activator of drug-responsive genes including CDR1 and CDR2; has Zn(2)-Cys(6) binuclear cluster; binds DRE element; gene in zinc cluster region near MTL locus; resequencing indicates that TAC1 spans orf19.3188 and orf19.3189	2.08012	0.00248621
orf19.7625	orf19.7625	PGA1	Putative GPI-anchored protein; induced during cell wall regeneration; required for normal adhesion to host cells and for adherence during biofilm formation	2.07421	0.00543695
orf19.5760_RC	orf19.5760	IHD1	Putative GPI-anchored protein; alkaline upregulated; greater transcription in hyphal form than yeast form; regulated by Nrg1p, Rfg1p, Tup1p; regulated by Tsa1p, Tsa1Bp in minimal media at 37; induced in oralpharyngeal candidasis	2.06742	0.00244035
orf19.1690_RC	orf19.1690	TOS1	Protein similar to alpha agglutinin anchor subunit; secreted; exogenously expressed protein is a substrate for Kex2p processing in vitro; fluconazole-induced; induced by alpha pheromone in SpiderM medium; Hap43p-induced	2.06454	0.0194834
orf19.2765_RC	orf19.2765	PGA62	Adhesin-like cell wall protein; putative GPI-anchor; fluconazole-induced; regulated by iron; expression greater in high iron; induced during cell wall regeneration; Cyr1p or Ras1p downregulated; positively regulated by Tbf1p	2.06438	0.00579918
orf19.3829_RC	orf19.3829	PHR1	Glycosidase of cell surface; may act on cell-wall beta-1,3-glucan prior to beta-1,6-glucan linkage; E169 and E270 at active site; role in systemic but not vaginal virulence (neutral, not low pH); high pH or filamentation induced	2.05409	0.00149861
orf19.2907	orf19.2907	PGA42	Putative GPI-anchored adhesin-like protein; decreased transcription is observed in azole-resistant strains that overexpress CDR1 and CDR2 or MDR1	2.0488	0.00513879
orf19.4367	orf19.4367	SMC1	Protein similar to chromosomal ATPases; RNA abundance regulated by tyrosol and cell density; cell-cycle regulated periodic mRNA expression	2.04777	0.02798
orf19.6081_RC	orf19.6081	PHR2	Glycosidase; role in cell wall structure; may act on beta-1,3-glucan prior to beta-1,6-glucan linkage; role in vaginal not systemic virulence (low pH not neutral); low pH, high iron, fluconazole, Hap43p-induced; Rim101p-downregulated at pH8	2.04529	0.000597585
orf19.3923_RC	orf19.3923	PGA37	Putative GPI-anchored protein; Hap43p-repressed gene	2.026	0.000465161
orf19.940	orf19.940	BUD2	GTPase activating protein (GAP) for Rsr1p; negative regulator of filament branching, acts in hyphal growth guidance; required for wild-type budding pattern; expression greater in low iron; regulated by tyrosol and cell density	2.02595	0.00655684
orf19.1690	orf19.1690	TOS1	Protein similar to alpha agglutinin anchor subunit; secreted; exogenously expressed protein is a substrate for Kex2p processing in vitro; fluconazole-induced; induced by alpha pheromone in SpiderM medium; Hap43p-induced	2.01385	0.00691413
orf19.2062_RC	orf19.2062	SOD4	Copper- and zinc-containing superoxide dismutase; role in response to host innate immune ROS; regulated on white-opaque switching; ciclopirox olamine induced; caspofungin repressed; family includes SOD1, SOD4, SOD5, SOD6; yeast-associated	2.01069	0.0079325
orf19.6573_RC	orf19.6573	BEM2	Putative Rho1p GTPase activating protein (GAP); serum-induced transcription	2.00271	0.00690161
mtlalpha2	mtlalpha2	MTLALPHA2	Homeodomain protein of MTLalpha (Mating Type Like) locus; alpha2p, together with a1p, repress white-opaque switching and mating (an opaque-specific process); a/alpha mating type may increase virulence, provides competitive advantage	-2.00913	0.0036804
orf19.4450	orf19.4450	ZCF23	Predicted zinc-finger protein; late-stage biofilm-induced gene	-2.01129	0.001534
orf19.5343	orf19.5343	ASH1	GATA-like transcription factor that localizes to nuclei of daughter cells and hyphal tip cells; mRNA localization is mediated by binding to She3p; required for wild-type virulence and filamentous growth	-2.01686	0.000509442
orf19.2886_RC	orf19.2886	CEK1	ERK-family protein kinase, required for wild-type yeast-hyphal switching, mating efficiency, and virulence in a mouse model; Cst20p-Hst7p-Cek1p-Cph1p MAPK pathway regulates mating, and invasive hyphal growth under some conditions	-2.02366	0.00121453
orf19.4796	orf19.4796		Putative eIF-4E-binding repressor of CAP-dependent translation; stationary phase enriched protein	-2.03225	0.000677429
orf19.1341_RC	orf19.1341	PRR2	Putative serine/threonine protein kinase; mutation confers resistance to 5-fluorocytosine (5-FC)	-2.0622	0.00601034
orf19.7150	orf19.7150	NRG1	Transcriptional repressor; regulates chlamydospore development, hyphal gene induction, virulence genes, and genes involved in rescue/stress responses; effects both Tup1p-dependent (major) and -independent (minor) regulation; biofilm-induced	-2.06671	0.00391488
orf19.878	orf19.878	NBN1	Subunit of the NuA4 histone acetyltransferase complex; Plc1p-regulated	-2.07708	0.000660373
orf19.971_RC	orf19.971	SKN7	Putative homolog of S. cerevisiae Skn7p, which is predicted to be a response regulator protein in a phosphorelay signal transduction pathway; required for normal hydrogen peroxide resistance	-2.09636	0.00164021
orf19.1496	orf19.1496		Putative transcription factor with zinc finger DNA-binding motif; Hap43p-repressed gene	-2.10423	0.00157296
orf19.794	orf19.794	SSN3	Putative cyclin-dependent protein kinase; mutants are sensitive to growth on H2O2 medium	-2.11251	0.00136787
orf19.7208	orf19.7208	CSK1	Putative mitogen-activated protein (MAP) kinase with an unknown role; null mutant produces wrinkled colonies; similar to S. cerevisiae Smk1p, which is a protein kinase required for sporulation	-2.13215	0.00417599
orf19.1187	orf19.1187	CPH2	Myc-bHLH family transcriptional activator of hyphal growth; directly regulates Tec1p, which regulates hypha-specific genes; probably homodimeric, phosphorylated; required for wild-type levels of Candida colonization of the mouse GI tract	-2.1383	0.000936851
orf19.4252	orf19.4252		Ortholog(s) have protein serine/threonine kinase activity	-2.14743	0.00572555
orf19.2781_RC	orf19.2781		Predicted ORF in Assemblies 19, 20 and 21; possibly an essential gene, disruptants not obtained by UAU1 method	-2.1857	0.00325603
orf19.5343_RC	orf19.5343	ASH1	GATA-like transcription factor that localizes to nuclei of daughter cells and hyphal tip cells; mRNA localization is mediated by binding to She3p; required for wild-type virulence and filamentous growth	-2.21236	0.00159387
orf19.4775	orf19.4775	CTA8	Essential transcription factor, mediates heat shock transcriptional induction; in the absence of heat stress, Cta8p levels are modulated by growth temperature to regulate basal expression of genes involved in protein folding	-2.22245	0.00191111
orf19.2781	orf19.2781		Predicted ORF in Assemblies 19, 20 and 21; possibly an essential gene, disruptants not obtained by UAU1 method	-2.22593	0.00171837
orf19.4767	orf19.4767	ZCF28	Putative transcription factor with zinc cluster DNA-binding motif; required for yeast cell adherence to silicone substrate	-2.26333	0.000874899
orf19.4752	orf19.4752	MSN4	Zinc finger transcription factor; similar to S. cerevisiae Msn4p, but not a significant stress response regulator in C. albicans; partly complements STRE-activation defect of S. cerevisiae msn2 msn4 double mutant; biofilm-induced gene	-2.26618	0.00070595
orf19.7504	orf19.7504		Predicted ORF in Assemblies 19, 20 and 21; Plc1p-regulated; induced in core caspofungin response	-2.27669	0.00220772
orf19.2054	orf19.2054	FGR15	Putative transcription factor with zinc finger DNA-binding motif; lacks an ortholog in S. cerevisiae; transposon mutation affects filamentous growth; caspofungin induced; mutation causes marginal increase in caspofungin sensitivity	-2.35491	0.00279036
orf19.217	orf19.217		Ortholog(s) have sequence-specific DNA binding activity	-2.35767	0.0159036
orf19.4427	orf19.4427	SKP1	Putative subunit D of kinetochore protein complex CBF3; regulated by Gcn4p; repressed in response to amino acid starvation (3-aminotriazole treatment)	-2.42659	0.00479679
orf19.5953	orf19.5953		Putative transcription factor; possibly an essential gene, disruptants not obtained by UAU1 method	-2.44723	0.000436444
orf19.3308	orf19.3308	STB5	Putative transcription factor with zinc cluster DNA-binding motif; has similarity to S. cerevisiae Stb5p; Hap43p-repressed gene	-2.47157	0.00163684
orf19.3534	orf19.3534	RHO3	Putative Rho family GTPase; possible substrate of protein farnesyltransferase and geranylgeranyltransferase type I; greater transcription in hyphal form than yeast form; plasma membrane-localized	-2.5443	0.00362346
orf19.3308_RC	orf19.3308	STB5	Putative transcription factor with zinc cluster DNA-binding motif; has similarity to S. cerevisiae Stb5p; Hap43p-repressed gene	-2.70198	0.0034276
orf19.233.1	orf19.233.1	HRT1	Protein similar to S. cerevisiae Hrt1p, which is a component of a nuclear ubiquitin-protein ligase complex involved in cell cycle control; induced under hydroxyurea treatment	-2.93181	0.00915853
orf19.1341	orf19.1341	PRR2	Putative serine/threonine protein kinase; mutation confers resistance to 5-fluorocytosine (5-FC)	-2.94668	0.00233168
orf19.895	orf19.895	HOG1	MAP kinase of osmotic-, heavy metal-, and core stress response; role in regulation of glycerol, D-arabitol in response to stress; phosphorylated in response to H2O2 (Ssk1p-dependent) or NaCl; mutant induces protective mouse immune response	-3.06728	0.0032112
orf19.2324	orf19.2324	UBA4	Putative ubiquitin activating protein; Hap43p-repressed gene; increased expression in response to prostaglandins; clade-associated gene expression	-3.10754	0.00401097
orf19.124	orf19.124	CIC1	Putative proteasome-interacting protein; transcription is upregulated in both intermediate and mature biofilms	-3.46036	0.0031285
