# Supplementary material for: Targeted Changes of the Cell Wall Proteome Influence Candida albicans Ability to Form Single- and Multi-strain Biofilms
Source: PLoS Pathog. 2014 Dec 11;10(12):e1004542. doi: 10.1371/journal.ppat.1004542 (PMC4263760; doi:10.1371/journal.ppat.1004542)
Supplement: S5 Table — Complete transcript profiling dataset of PGA22 overexpression versus control. Headers: Probe ID, microarray probe identifier for each ORF; ORF19, orf19 nomenclature from the Assembly 21 version of the Candida albicans genome at the CGD; Gene name, gene name according to CGD; Description, gene description according to CGD; Fold change, fold-change expression value in doxycycline-treated cells versus untreated controls from 3 independent biological replicates; p-student, p-value of the corresponding fold-change value using a Student's t-test (within group). (XLSX) [file ppat.1004542.s015.xlsx]

## Sheet: Table S6
Probe ID	ORF19	Gene name	Description	fold change	p-student
orf19.3738_7	ORF19.3738	PGA22	Putative GPI-anchored protein; adhesin-like protein	16.2029	0.00022
orf19.3738_305	ORF19.3738	PGA22	Putative GPI-anchored protein; adhesin-like protein	10.939	0.00648
orf19.5267_417	ORF19.5267		Putative cell wall adhesin-like protein; repressed in core caspofungin response and by alpha pheromone in SpiderM medium; transcript reduced in ace2 mutant; flow model, rat catheter and Spider biofilm repressed	2.35497	0.01743
orf19.344_533	ORF19.344		Protein of unknown function; upregulated by fluphenazine treatment or in an azole-resistant strain that overexpresses CDR1 and CDR2; transcript possibly regulated by Tac1	2.31869	0.008
orf19.1670_2517	ORF19.1670	BRO1	Class E vacuolar protein sorting factor; role in transport from multivesicular body to vacuole; not involved in Rim101 pathway; macrophage and pseudohyphal-repressed; flow model biofilm induced	2.16845	0.03572
orf19.4910_625	ORF19.4910	FGR41	Putative GPI-anchored adhesin-like protein; transposon mutation affects filamentous growth; Spider biofilm repressed	2.10103	0.03293
orf19.5267_346	ORF19.5267		Putative cell wall adhesin-like protein; repressed in core caspofungin response and by alpha pheromone in SpiderM medium; transcript reduced in ace2 mutant; flow model, rat catheter and Spider biofilm repressed	1.9715	0.02162
orf19.344_679	ORF19.344		Protein of unknown function; upregulated by fluphenazine treatment or in an azole-resistant strain that overexpresses CDR1 and CDR2; transcript possibly regulated by Tac1	1.96745	0.0022
orf19.7218_675	ORF19.7218	RBE1	Pry family cell wall protein; Rim101, Efg1, Ssn6, alkaline repressed; O-glycosylation; no GPI anchor predicted; ketoconazol induced; regulated by Sef1, Sfu1, Hap4; flow model biofilm induced; rat catheter and Spider biofilm repressed	1.93324	0.03251
orf19.7218_757	ORF19.7218	RBE1	Pry family cell wall protein; Rim101, Efg1, Ssn6, alkaline repressed; O-glycosylation; no GPI anchor predicted; ketoconazol induced; regulated by Sef1, Sfu1, Hap4; flow model biofilm induced; rat catheter and Spider biofilm repressed	1.92096	0.01323
orf19.7586_1457	ORF19.7586	CHT3	Major chitinase; secreted; functional homolog of S. cerevisiae Cts1p; 4 N-glycosylation motifs; possible O-mannosylation; putative signal peptide; hyphal-repressed; farnesol upregulated in biofilm; regulated by Efg1p, Cyr1p, Ras1p	1.8748	0.03404
orf19.6010_619	ORF19.6010	CDC5	Polo-like kinase; member of conserved Mcm1 regulon; depletion causes defects in spindle elongation and Cdc35-dependent filamentation; virulence-group-correlated expression; likely essential (UAU1 method); Spider biofilm repressed	1.8008	0.02899
orf19.1212_671	ORF19.1212		Ortholog(s) have FFAT motif binding, phosphatidylinositol binding activity	1.79822	0.04393
orf19.4910_694	ORF19.4910	FGR41	Putative GPI-anchored adhesin-like protein; transposon mutation affects filamentous growth; Spider biofilm repressed	1.77837	0.03957
orf19.7586_1607	ORF19.7586	CHT3	Major chitinase; secreted; functional homolog of S. cerevisiae Cts1p; 4 N-glycosylation motifs; possible O-mannosylation; putative signal peptide; hyphal-repressed; farnesol upregulated in biofilm; regulated by Efg1p, Cyr1p, Ras1p	1.74043	0.03741
orf19.5305_87	ORF19.5305	RHD3	GPI-anchored yeast-associated cell wall protein; induced in high iron; clade-associated gene expression; not essential for cell wall integrity; fluconazole-repressed; flow model and Spider biofilm repressed	1.73643	0.04412
orf19.3893_1462	ORF19.3893	SCW11	Cell wall protein; repressed in ace2 mutant; repressed in core caspofungin response; induced in high iron; possibly an essential gene, disruptants not obtained by UAU1 method; rat catheter and Spider biofilm repressed	1.7039	0.02647
orf19.4645_1372	ORF19.4645	BEM1	Protein required for wild-type budding, hyphal growth, and virulence in a mouse systemic infection; suppresses pseudohyphal and filamentous growth defects of various S. cerevisiae mutants and heat sensitivity of S. cerevisiae cdc24-4 mutant	1.68172	0.00817
orf19.5636_280	ORF19.5636	RBT5	GPI-linked cell wall protein; hemoglobin utilization; Rfg1, Rim101, Tbf1, Fe regulated; Sfu1, Hog1, Tup1, serum, alkaline pH, antifungal drugs, geldamycin repressed; Hap43 induced; required for RPMI biofilms; Spider biofilm induced	1.67219	0.07068
orf19.5188_2797	ORF19.5188	CHS1	Chitin synthase; essential; for primary septum synthesis in yeast and hyphae; 1 of several chitin synthases; enzymatically activated by proteolytic processing; complements defects of S. cerevisiae chs1 or chs2; Spider biofilm repressed	1.6686	0.02354
orf19.6393_1006	ORF19.6393		Putative Arf3p GTPase activating protein; Hap43p-repressed gene; possibly an essential gene, disruptants not obtained by UAU1 method	1.66842	0.02228
orf19.4959_1146	ORF19.4959		Protein of unknown function; Spider biofilm repressed	1.64785	0.01975
orf19.1538_660	ORF19.1538	TLG2	Putative syntaxin-like t-SNARE; macrophage/pseudohyphal-repressed	1.64084	0.01804
orf19.5343_1260	ORF19.5343	ASH1	GATA-like transcription factor; localizes to daughter cell, hyphal tip cell nuclei; mRNA localization mediated by She3; required for WT virulence and filamentous growth on solid media; Ras1 repressed in yeast, Cyr1 repressed yeast, hyphae	1.63974	0.01106
orf19.2706_831	ORF19.2706	CRH11	GPI-anchored cell wall transglycosylase, putative ortholog of S. cerevisiae Crh1p; predicted glycosyl hydrolase domain; similar to Csf4p and to antigenic A. fumigatus Aspf9; predicted Kex2p substrate; caspofungin-induced	1.6271	0.02935
orf19.5343_605	ORF19.5343	ASH1	GATA-like transcription factor; localizes to daughter cell, hyphal tip cell nuclei; mRNA localization mediated by She3; required for WT virulence and filamentous growth on solid media; Ras1 repressed in yeast, Cyr1 repressed yeast, hyphae	1.62428	0.0199
orf19.5402_496	ORF19.5402		Ortholog of Candida albicans WO-1 : CAWG_02394	1.60326	0.02067
orf19.5805_1414	ORF19.5805	DLD1	Putative D-lactate dehydrogenase; white cell-specific trancript; colony morphology-related gene regulation by Ssn6; Hap43-repressed; rat catheter biofilm induced; Spider biofilm repressed	1.59755	0.01793
orf19.639_226	ORF19.639		S. cerevisiae ortholog YDR370C/DXO1 has decapping and 5&#8242;-3&#8242; exoRNase activity; decreased transcription is observed upon fluphenazine treatment or in an azole-resistant strain that overexpresses CDR1 and CDR2	1.58852	0.04435
orf19.2706_745	ORF19.2706	CRH11	GPI-anchored cell wall transglycosylase, putative ortholog of S. cerevisiae Crh1p; predicted glycosyl hydrolase domain; similar to Csf4p and to antigenic A. fumigatus Aspf9; predicted Kex2p substrate; caspofungin-induced	1.57349	0.05993
orf19.6393_1184	ORF19.6393		Putative Arf3p GTPase activating protein; Hap43p-repressed gene; possibly an essential gene, disruptants not obtained by UAU1 method	1.57253	0.01552
orf19.3606_249	ORF19.3606		Ortholog of S. cereviae Sna4 vacuolar outer membrane protein that plays a role in sensitivity to NA+; induced by Mnl1 under weak acid stress	1.56918	0.02867
orf19.6010_1878	ORF19.6010	CDC5	Polo-like kinase; member of conserved Mcm1 regulon; depletion causes defects in spindle elongation and Cdc35-dependent filamentation; virulence-group-correlated expression; likely essential (UAU1 method); Spider biofilm repressed	1.5678	0.03363
orf19.3573_3325	ORF19.3573	PEX6	Ortholog(s) have ATPase activity, protein heterodimerization activity, role in fatty acid metabolic process, protein import into peroxisome matrix, receptor recycling, replicative cell aging and cytosol, nucleus, peroxisome localization	1.56541	0.0285
orf19.4623_34	ORF19.4623		Protein of unknown function; Spider biofilm repressed	1.55766	0.04052
orf19.144_2851	ORF19.144	SNU114	Protein similar to S. cerevisiae Snu114p, which is an RNA helicase involved in pre-mRNA splicing; likely to be essential for growth, based on an insertional mutagenesis strategy	1.55142	0.01805
orf19.2758_468	ORF19.2758	PGA38	Putative adhesin-like GPI-anchored protein; repressed during cell wall regeneration; possibly an essential gene, disruptants not obtained by UAU1 method; rat catheter and Spider biofilm repressed	1.54363	0.0375
orf19.5611_679	ORF19.5611		Predicted 3-methylbutanol:NAD(P) oxidoreductase and methylglyoxal reductase (NADPH-dependent); role in ergosterol metabolic process; early stage flow model biofilm induced; Spider biofilm induced	1.54352	0.049
orf19.1146_241	ORF19.1146		Ortholog of Candida albicans WO-1 : CAWG_00265	1.54063	0.01866
orf19.1542_844	ORF19.1542	HEX3	Protein similar to S. cerevisiae Hex3p, which is involved in DNA damage response; transposon mutation affects filamentous growth	1.53932	0.01749
orf19.5238_1745	ORF19.5238		Ortholog(s) have cytosol, nucleus localization	1.53925	0.01079
orf19.6760_2002	ORF19.6760	MDS3	TOR signaling pathway component; required for growth and hyphal formation at alkaline pH, for full virulence in a mouse model of systemic infection and for SD and Spider medium biofilm formation; role in chlamydospore formation	1.53179	0.07107
orf19.4450.1_16	ORF19.4450.1		Protein conserved among the CTG-clade; 2 adjacent upstream SRE-1 elements; highly up-regulated in cecum-grown cells in a Cph2-dependent manner; Hap43-repressed; rat catheter, Spider and flow model biofilm induced	1.53046	0.05465
orf19.6209_1263	ORF19.6209		Predicted membrane transporter; monocarboxylate porter (MCP) family, major facilitator superfamily (MFS); possibly essential, disruptants not obtained by UAU1 method; rat catheter and Spider biofilm induced	1.527	0.01505
orf19.539_1332	ORF19.539	LAP3	Putative aminopeptidase; positively regulated by Sfu1; clade-associated gene expression; virulence-group-correlated expression; induced by alpha pheromone in SpiderM medium; Hap43-induced; Spider and flow model biofilm induced	1.52185	0.03001
orf19.1446_545	ORF19.1446	CLB2	B-type mitotic cyclin (cyclin-dependent protein kinase regulatory subunit); essential; required for wild-type mitotic exit; role in cell polarization; interacts with catalytic subunit Cdk1; Spider biofilm repressed	1.52173	0.02337
orf19.2387_1647	ORF19.2387		Putative tRNA-Pro synthetase; genes encoding ribosomal subunits, translation factors, and tRNA synthetases are downregulated upon phagocytosis by murine macrophage	1.52132	0.00371
orf19.5635_588	ORF19.5635	PGA7	GPI-linked hyphal surface antigen; induced by ciclopirox olamine, ketoconazole, Rim101 at pH 8; Hap43, fluconazole; flow model biofilm induced; Spider biofilm induced; required for RPMI biofilm; Bcr1-induced in a/a biofilm	1.51411	0.08085
orf19.2791_1593	ORF19.2791	BBC1	Putative SH3-domain-containing protein	1.51088	0.01283
orf19.6102_741	ORF19.6102	RCA1	Protein involved in regulation of carbonic anhydrases; controls CO2 sensing; bZIP domain-containing transcription factor of the ATF/CREB family; null mutant displays slow growth, abnormal colony morphology and invasive growth	1.51036	0.01516
orf19.4897_828	ORF19.4897	SFH5	Putative phosphatidylinositol transporter; rat catheter and Spider biofilm repressed	1.5058	0.00417
orf19.4645_1511	ORF19.4645	BEM1	Protein required for wild-type budding, hyphal growth, and virulence in a mouse systemic infection; suppresses pseudohyphal and filamentous growth defects of various S. cerevisiae mutants and heat sensitivity of S. cerevisiae cdc24-4 mutant	1.50304	0.01179
orf19.7277_447	ORF19.7277		Predicted ORF in retrotransposon Zorro2 with similarity to zinc finger-containing retroviral nucleocapsid proteins; un-merged from orf19.7275 in a revision of Assembly 21 based on comparative genome analysis and new sequence data	1.50198	0.00803
orf19.7027_1938	ORF19.7027		Protein of unknown function; Spider biofilm induced	1.50135	0.05449
orf19.6102_292	ORF19.6102	RCA1	Protein involved in regulation of carbonic anhydrases; controls CO2 sensing; bZIP domain-containing transcription factor of the ATF/CREB family; null mutant displays slow growth, abnormal colony morphology and invasive growth	1.5008	0.00663
orf19.3760_863	ORF19.3760	DLH1	Functional homolog of S. cerevisiae Dmc1; a meiosis-specific protein required for repair of double-strand breaks and pairing between homologous chromosomes	1.50063	0.05869
orf19.5565_865	ORF19.5565		Putative 3-hydroxyisobutyrate dehydrogenase; rat catheter and Spider biofilm induced	1.49814	0.10396
orf19.4072_2496	ORF19.4072	IFF6	Putative GPI-anchored adhesin-like protein; opaque-specific transcript; macrophage-induced gene; Hap43-repressed gene; Spider biofilm induced	1.49685	0.00657
orf19.3846_1835	ORF19.3846	LYS4	Homoaconitase; regulated by Gcn4, Gcn2; induced in response to amino acid starvation (3-AT); induced by human whole blood or PMNs; Hap43-repressed; flow model and Spider biofilm repressed	1.49576	0.02484
orf19.1037_1653	ORF19.1037		Protein of unknown function; rat catheter biofilm repressed	1.49493	0.00648
orf19.7378_1443	ORF19.7378		Ortholog(s) have phosphopantothenoylcysteine decarboxylase activity, protein phosphatase inhibitor activity and role in regulation of mitotic cell cycle, response to salt stress	1.49485	0.00853
orf19.5213.2_101	ORF19.5213.2	COX9	Putative subunit VIIa of cytochrome c oxidase; flucytosine induced	1.49274	0.00949
orf19.7115_1294	ORF19.7115	SAC7	Putative GTPase activating protein (GAP) for Rho1; repressed upon adherence to polystyrene; macrophage/pseudohyphal-repressed; transcript is upregulated in RHE model of oral candidiasis and in clinical oral candidiasis	1.49214	0.01091
orf19.7295_1504	ORF19.7295		Ortholog(s) have protein phosphatase 1 binding activity, role in actin filament organization, cortical actin cytoskeleton organization, endocytosis, protein secretion and actin cortical patch, nucleus localization	1.48979	0.06087
orf19.7450_734	ORF19.7450		Ortholog(s) have role in cytokinesis, septin ring assembly and cellular bud neck septin ring localization	1.48857	0.05266
orf19.2826_1009	ORF19.2826		Ortholog of C. dubliniensis CD36 : Cd36_27680, C. parapsilosis CDC317 : CPAR2_801140, Candida tenuis NRRL Y-1498 : CANTEDRAFT_129982 and Debaryomyces hansenii CBS767 : DEHA2E09526g	1.48713	0.0038
orf19.6047_1205	ORF19.6047	TUF1	Translation elongation factor TU; macrophage/pseudohyphal-induced; repressed upon phagocytosis by murine macrophage; levels decrease in stationary phase cells; Spider biofilm repressed	1.48579	0.02435
orf19.5565_934	ORF19.5565		Putative 3-hydroxyisobutyrate dehydrogenase; rat catheter and Spider biofilm induced	1.48232	0.04965
orf19.6047_1136	ORF19.6047	TUF1	Translation elongation factor TU; macrophage/pseudohyphal-induced; repressed upon phagocytosis by murine macrophage; levels decrease in stationary phase cells; Spider biofilm repressed	1.48152	0.02271
orf19.1716_733	ORF19.1716	URA3	Orotidine-5'-phosphate decarboxylase; pyrimidine biosynthesis; gene used as genetic marker; decreased expression when integrated at ectopic chromosomal locations can cause defects in hyphal growth and virulence; Spider biofilm repressed	1.48093	0.01533
orf19.7678_427	ORF19.7678	ATP16	Subunit of the mitochondrial F1F0 ATP synthase; sumoylation target; protein newly produced during adaptation to the serum; Spider biofilm repressed	1.47891	0.09769
orf19.664_490	ORF19.664		Ortholog of C. dubliniensis CD36 : Cd36_10680, Debaryomyces hansenii CBS767 : DEHA2E14058g, Pichia stipitis Pignal : PICST_29620 and Spathaspora passalidarum NRRL Y-27907 : SPAPADRAFT_146037	1.47352	0.06212
orf19.3884_273	ORF19.3884	FGR50	Protein lacking an ortholog in S. cerevisiae; transposon mutation affects filamentous growth; Spider biofilm repressed	1.47278	0.025
orf19.3473_1403	ORF19.3473		Ortholog(s) have enzyme activator activity, histone acetyltransferase activity, structural molecule activity	1.47122	0.00209
orf19.5805_1241	ORF19.5805	DLD1	Putative D-lactate dehydrogenase; white cell-specific trancript; colony morphology-related gene regulation by Ssn6; Hap43-repressed; rat catheter biofilm induced; Spider biofilm repressed	1.47054	0.00522
orf19.1630_1176	ORF19.1630		Ortholog(s) have cytoplasm localization	1.47006	0.04737
orf19.2465_1131	ORF19.2465	POL32	Putative subunit of DNA polymerase delta, involved in chromosomal DNA replication; cell-cycle regulated periodic mRNA expression	1.46937	0.02289
orf19.1974_691	ORF19.1974	TFS1	Putative carboxypeptidase y inhibitor; transcript regulated upon yeast-hypha switch; colony morphology-related gene regulation by Ssn6	1.46854	0.06661
orf19.6109_850	ORF19.6109	TUP1	Transcriptional corepressor; represses filamentous growth; regulates switching; role in germ tube induction, farnesol response; in repression pathways with Nrg1, Rfg1; farnesol upregulated in biofilm; rat catheter, Spider biofilm repressed	1.46673	0.02136
orf19.1977_960	ORF19.1977	URA4	Dihydroorotase; protein present in exponential and stationary growth phase yeast cultures	1.46612	0.05441
orf19.1562_484	ORF19.1562		Protein of unknown function; flow model biofilm induced; Spider biofilm induced; repressed by alpha pheromone in SpiderM medium	1.46569	0.06286
orf19.2201_280	ORF19.2201		Ortholog(s) have ribosome binding activity, role in mitochondrial respiratory chain complex III assembly, positive regulation of mitochondrial translation and mitochondrial ribosome localization	1.46502	0.0108
orf19.6734_1647	ORF19.6734	TCC1	Putative transcription factor/corepressor; regulation of filamentation and virulence; interacts with Tup1; regulates hypha-specific gene expression; contains 4 tetratricopeptide repeat (TPR) motifs; flucytosine repressed; Tbp1-induced	1.46407	0.10039
orf19.872_980	ORF19.872		Ortholog of C. dubliniensis CD36 : Cd36_18230, Debaryomyces hansenii CBS767 : DEHA2E20636g, Pichia stipitis Pignal : PICST_66811 and Spathaspora passalidarum NRRL Y-27907 : SPAPADRAFT_60843	1.46219	0.03566
orf19.2389_739	ORF19.2389		Ortholog(s) have DNA replication origin binding, single-stranded DNA binding activity	1.4608	0.01214
orf19.7341_587	ORF19.7341		Protein of unknown function; flow model biofilm induced; ketoconazole-repressed	1.46063	0.01537
orf19.7569_1339	ORF19.7569	SIK1	Putative U3 snoRNP protein; Hap43p-induced gene; physically interacts with TAP-tagged Nop1p	1.46028	0.01512
orf19.1449_544	ORF19.1449		Protein of unknown function; induced in azole-resistant strain that overexpresses MDR1; protein present in exponential and stationary growth phase yeast cultures; Spider biofilm induced	1.45973	0.02771
orf19.7254_1495	ORF19.7254		Ortholog(s) have role in mRNA metabolic process, mitochondrial translational initiation and extrinsic to membrane, mitochondrial inner membrane localization	1.45791	0.00522
orf19.6119_1957	ORF19.6119		Protein of unknown function; Spider biofilm repressed	1.45737	0.05411
orf19.1562_290	ORF19.1562		Protein of unknown function; flow model biofilm induced; Spider biofilm induced; repressed by alpha pheromone in SpiderM medium	1.4571	0.07298
orf19.3505_2173	ORF19.3505		Ortholog(s) have role in TOR signaling cascade, actin filament bundle assembly, eisosome assembly, endosomal transport, establishment or maintenance of actin cytoskeleton polarity, regulation of cell growth	1.4564	0.04862
orf19.5058_1556	ORF19.5058	SMI1	Cell wall biosynthesis protein; Hap43, caspofungin-repressed; Cyr1-induced in hyphal cells; reduced biofilm cell wall glucan in mutant; possibly essential (UAU1 method); flow model biofilm induced	1.45628	0.04739
orf19.1124_32	ORF19.1124		Protein of unknown function; flow model biofilm induced; Spider biofilm induced	1.45528	0.05708
orf19.5342.2_25	ORF19.5342.2		Protein of unknown function; protein newly produced during adaptation to the serum	1.45473	0.10617
orf19.994_143	ORF19.994		Protein of unknown function; induced by Mnl1 under weak acid stress; flow model biofilm repressed	1.4544	0.00917
orf19.7325_750	ORF19.7325	SCO1	Putative copper transporter; Hap43p-repressed gene	1.45416	0.01333
orf19.3315_882	ORF19.3315	CTA9	Protein required for normal filamentous growth; induced during the mating process; mRNA binds She3; activates transcription in 1-hybrid assay in S. cerevisiae	1.45245	0.00994
orf19.7034_2153	ORF19.7034		Putative eIF4E-associated protein;, accelerates mRNA degradation by promoting decapping; Spider biofilm repressed	1.45193	0.00888
orf19.671_570	ORF19.671	PSP1	Protein repressed during the mating process	1.45121	0.05559
orf19.2863.1_230	ORF19.2863.1	ERV1	Predicted component of the mitochondrial intermembrane space (IMS), involved in protein import into mitochondrial intermembrane space	1.45035	0.00071
orf19.1544_272	ORF19.1544		Putative cis-golgi localized protein involved in ER to Golgi transport; Spider biofilm repressed	1.44893	0.0174
orf19.1223_1729	ORF19.1223	DBF2	Essential serine/threonine protein kinase involved in mitotic spindle formation and cytokinesis; required for septum formation, exit from mitosis, and normal hyphal morphogenesis; virulence-group-correlated expression	1.44698	0.03926
orf19.4262_1064	ORF19.4262		Ortholog(s) have mRNA binding activity and role in cellular protein complex localization, establishment of mitochondrion localization, nuclear-transcribed mRNA catabolic process, deadenylation-dependent decay	1.44643	0.03573
orf19.717_1428	ORF19.717	HSP60	Heat shock protein; soluble in hyphae; regulated by Nrg1 and by iron; induced in high iron; heavy metal (cadmium) stress-induced; sumoylation target; protein present in exponential and stationary phase cells; Hap43-repressed	1.44568	0.03302
orf19.6178_937	ORF19.6178	FBP1	Fructose-1,6-bisphosphatase; key gluconeogenesis enzyme; regulated by Efg1, Ssn6; induced by phagocytosis; effects switch from glycolysis to gluconeogenesis in macrophage; rat flow model biofilm induced; overlaps orf19.6179	1.44389	0.06062
orf19.445_1009	ORF19.445		Protein of unknown function; repressed by prostaglandins	1.44332	0.00617
orf19.5121_2522	ORF19.5121	OPT5	Oligopeptide transporter; fungal-specific (no human or murine homolog); induced by BSA, but not by tetrapeptide or pentapeptide	1.44321	0.00999
orf19.4123_4752	ORF19.4123		Putative THO complex subunit; possibly an essential gene, disruptants not obtained by UAU1 method; protein newly produced during adaptation to the serum	1.44303	0.0852
orf19.2970_4132	ORF19.2970	LYS2	Heterodimeric alpha-aminoadipate reductase large subunit; lysine biosynthesis; predicted binding sites for AMP and alpha-aminoadipate; inhibited by lys or thialysine; regulated by Gcn2 and Gcn4; Spider biofilm induced, flow model repressed	1.44271	0.01482
orf19.4257_5047	ORF19.4257	INT1	Protein structurally similar to alpha-subunit of human leukocyte integrin; role in morphogenesis, adhesion, and mouse cecal colonization and systemic virulence; similar to S. cerevisiae Bud4; Hap43-induced gene	1.44181	0.06769
orf19.6240_1426	ORF19.6240		SH3-domain protein; role in barrier septum assembly involved in cell cycle cytokinesis; activates the Chs2 chitin synthase activity during cytokinesis; Spider biofilm repressed	1.44107	0.00161
orf19.2459_2860	ORF19.2459		Protein of unknown function; mRNA binds to She3; Hap43 repressed gene; Spider biofilm induced	1.43982	0.08973
orf19.1144_3225	ORF19.1144		Protein with SEL-1 like protein domain; early-stage flow model biofilm induced	1.4392	0.02197
orf19.2758_792	ORF19.2758	PGA38	Putative adhesin-like GPI-anchored protein; repressed during cell wall regeneration; possibly an essential gene, disruptants not obtained by UAU1 method; rat catheter and Spider biofilm repressed	1.43853	0.05971
orf19.5274_2269	ORF19.5274		Ortholog(s) have cellular bud neck, cellular bud tip, cytoplasm localization	1.43723	0.04582
orf19.6760_1927	ORF19.6760	MDS3	TOR signaling pathway component; required for growth and hyphal formation at alkaline pH, for full virulence in a mouse model of systemic infection and for SD and Spider medium biofilm formation; role in chlamydospore formation	1.43498	0.07654
orf19.2863.1_340	ORF19.2863.1	ERV1	Predicted component of the mitochondrial intermembrane space (IMS), involved in protein import into mitochondrial intermembrane space	1.43284	0.00048
orf19.4573_1403	ORF19.4573	ZCF26	Zn2-Cys6 transcription factor of unknown function; induced by alpha pheromone in SpiderM medium	1.42961	0.01045
orf19.5305_315	ORF19.5305	RHD3	GPI-anchored yeast-associated cell wall protein; induced in high iron; clade-associated gene expression; not essential for cell wall integrity; fluconazole-repressed; flow model and Spider biofilm repressed	1.42947	0.11134
orf19.3737_2323	ORF19.3737		Protein with a Vps9 vacuolar protein sorting protein domain; Hap43-repressed; repressed by ciclopirox olamine; Spider biofilm induced	1.42794	0.00675
orf19.2219_3338	ORF19.2219	ORF298	Predicted ORF in retrotransposon Tca3; similar to Gag-Pol; a-specific transcript, alpha-factor induced; rat catheter biofilm repressed; mRNA binds She3	1.42697	0.07887
orf19.3577_862	ORF19.3577	COQ5	Putative methyltransferase of ubiquinone biosynthesis; regulated by Gcn4; repressed by amino acid starvation (3-AT), Hap43; induced upon adherence to polystyrene; Spider biofilm repressed	1.42375	0.0677
orf19.3895_1330	ORF19.3895	CHT2	GPI-linked chitinase; required for normal filamentous growth; repressed in core caspofungin response; fluconazole, Cyr1, Efg1, pH-regulated; mRNA binds She3 and is localized to yeast-form buds and hyphal tips; Spider biofilm repressed	1.42337	0.06774
orf19.1885_653	ORF19.1885	TAF4	Putative TFIID subunit; mutation confers hypersensitivity to toxic ergosterol analog	1.42324	0.01937
orf19.4388_1006	ORF19.4388		Protein with a histone fold domain; similar to TAFII47 proteins from S. cerevisiae, Danio rerio, Drosophila melanogaster, human, and mouse	1.4229	0.00885
orf19.2414_897	ORF19.2414		Ortholog of S. cerevisiae Mpm1; a mitochondrial intermembrane space protein of unknown function; Hap43-repressed; Spider biofilm induced	1.42237	0.02685
orf19.3753_2274	ORF19.3753	SEF1	Zn2-Cys6 transcription factor; regulates iron uptake; negatively regulated by Sfu1p, positively regulated by Tbf1; promotes virulence in mice; mutants display decreased colonization of mouse kidneys; Spider biofilm induced	1.4221	0.00824
orf19.7396_964	ORF19.7396		Protein of unknown function; Spider biofilm induced; Hap43-repressed	1.42188	0.05188
orf19.1446_1390	ORF19.1446	CLB2	B-type mitotic cyclin (cyclin-dependent protein kinase regulatory subunit); essential; required for wild-type mitotic exit; role in cell polarization; interacts with catalytic subunit Cdk1; Spider biofilm repressed	1.42177	0.0682
orf19.3678_1350	ORF19.3678		Ortholog of C. dubliniensis CD36 : Cd36_02060, C. parapsilosis CDC317 : CPAR2_106200, Candida tenuis NRRL Y-1498 : CANTEDRAFT_96322 and Debaryomyces hansenii CBS767 : DEHA2C02310g	1.42119	0.01637
orf19.7187_625	ORF19.7187	MAM33	Putative mitochondrial acidic matrix protein; regulated by Ssn6p; protein present in exponential and stationary growth phase yeast cultures	1.42081	0.02807
orf19.7025_426	ORF19.7025	MCM1	Transcription factor; regulator of hyphal growth; may act with Wor1p; canonical and non-canonical binding sites; MADS domain DNA-binding motif; similar to S. cerevisiae Mcm1p; greater expression in white than opaque cells; intron in 5'-UTR	1.4208	0.02063
orf19.3265_1578	ORF19.3265	TRM1	Putative N2,N2-dimethylguanine tRNA methyltransferase; induced upon adherence to polystyrene	1.42004	0.0291
orf19.6240_1495	ORF19.6240		SH3-domain protein; role in barrier septum assembly involved in cell cycle cytokinesis; activates the Chs2 chitin synthase activity during cytokinesis; Spider biofilm repressed	1.41963	0.0006
orf19.5266_1197	ORF19.5266		Planktonic growth-induced gene	1.41953	0.00293
orf19.5136_403	ORF19.5136		Putative pyridoxamine 5'-phosphate oxidase; planktonic growth and early-stage flow model biofilm induced	1.4186	0.00579
orf19.5346_979	ORF19.5346		Ortholog(s) have role in transcription from RNA polymerase II promoter and transcription factor TFIID complex localization	1.41814	0.07828
orf19.4504_848	ORF19.4504		Has domain(s) with predicted oxidoreductase activity, transferase activity, transferring acyl groups other than amino-acyl groups, zinc ion binding activity and role in oxidation-reduction process	1.41799	0.0226
orf19.4184_1840	ORF19.4184		Protein with a predicted role in clathrin cage assembly; Hap43-repressed; Spider biofilm repressed	1.41791	0.02243
orf19.5818_931	ORF19.5818	SUR2	Putative ceramide hydroxylase; predicted enzyme of sphingolipid biosynthesis; regulated by Tsa1, Tsa1B under H2O2 stress conditions; Spider and flow model biofilm induced	1.41787	0.02161
orf19.5013_1570	ORF19.5013	AGM1	Phosphoacetylglucosamine mutase (N-acetylglucosamine-phosphate mutase); enzyme of UDP-N-acetylglucosamine (UDP-GlcNAc) biosynthesis	1.41748	0.01546
orf19.2275_402	ORF19.2275		Putative mitochondrial ribosomal protein; predicted role in aerobic respiration; Spider biofilm repressed	1.41512	0.03322
orf19.1223_1428	ORF19.1223	DBF2	Essential serine/threonine protein kinase involved in mitotic spindle formation and cytokinesis; required for septum formation, exit from mitosis, and normal hyphal morphogenesis; virulence-group-correlated expression	1.4124	0.12255
orf19.5326_52	ORF19.5326		Putative transcription factor with zinc finger DNA-binding motif; possible ortholog of S. cerevisiae Mig2p	1.41227	0.01375
orf19.2978_199	ORF19.2978		Protein of unknown function; Hap43-repressed gene	1.41194	0.07978
orf19.6598_1484	ORF19.6598	WAL1	Protein required for hyphal growth and for wild-type cell morphology, polarized budding, endocytosis, vacuole morphology; similar to Wiskott-Aldrich syndrome protein; localizes to cortical actin patches and hyphal tips	1.41154	0.03626
orf19.3022_762	ORF19.3022		Ortholog(s) have structural constituent of ribosome activity and mitochondrial small ribosomal subunit localization	1.41059	0.02085
orf19.6242_655	ORF19.6242	CYK3	Essential protein involved in cytokinesis; contains an SH3 domain	1.41018	0.00171
orf19.6170_390	ORF19.6170		Ortholog(s) have microtubule binding, protein heterodimerization activity, protein homodimerization activity	1.40995	0.0129
orf19.5136_481	ORF19.5136		Putative pyridoxamine 5'-phosphate oxidase; planktonic growth and early-stage flow model biofilm induced	1.40915	0.00568
orf19.1972_1363	ORF19.1972		Ortholog(s) have S-adenosylmethionine-dependent methyltransferase activity, role in histone lysine methylation and cytoplasm, nuclear chromatin localization	1.40831	0.00324
orf19.4390_1189	ORF19.4390		Protein of unknown function; repressed by alpha pheromone in SpiderM medium; transcript induced by Mnl1 under weak acid stress	1.40793	0.01495
orf19.1535_216	ORF19.1535		Protein of unknown function; Hap43-induced gene	1.40636	0.10938
orf19.3167_944	ORF19.3167		Heme A:farnesyltransferase; catalyzes the 1st step in conversion of protoheme to the heme A prosthetic group required for cytochrome c oxidase activity; Spider biofilm repressed	1.40629	0.03253
orf19.1449_613	ORF19.1449		Protein of unknown function; induced in azole-resistant strain that overexpresses MDR1; protein present in exponential and stationary growth phase yeast cultures; Spider biofilm induced	1.40566	0.02136
orf19.5605_1733	ORF19.5605		Ortholog(s) have protein binding, bridging, ubiquitin protein ligase binding activity and role in positive regulation of ubiquitin-dependent endocytosis, regulation of intracellular transport	1.40548	0.18719
orf19.4370_817	ORF19.4370		Protein of unknown function; induced by nitric oxide; oxidative stress-induced via Cap1; fungal-specific (no human or murine homolog)	1.40268	0.08993
orf19.190_778	ORF19.190		Ortholog(s) have role in endoplasmic reticulum organization, histone exchange and Swr1 complex, mitochondrion localization	1.40214	0.01828
orf19.4504_170	ORF19.4504		Has domain(s) with predicted oxidoreductase activity, transferase activity, transferring acyl groups other than amino-acyl groups, zinc ion binding activity and role in oxidation-reduction process	1.40176	0.02893
orf19.5307_1191	ORF19.5307	JEN2	Dicarboxylic acid transporter; regulated by glucose repression; induced by Rgt1; disruptants not obtained by UAU1 method; rat catheter and Spider biofilm induced	1.40129	0.2133
orf19.7027_2611	ORF19.7027		Protein of unknown function; Spider biofilm induced	1.40114	0.055
orf19.2823_1575	ORF19.2823	RFG1	HMG domain transcriptional repressor of filamentous growth and hyphal genes; in Tup1-dependent and -independent pathways; binds DNA; transcript not regulated by oxygen or serum; not responsible for hypoxic repression; Spider biofilm induced	1.40056	0.02635
orf19.4987_498	ORF19.4987	NUP49	Nuclear pore protein	1.39961	0.00543
orf19.6853_86	ORF19.6853		Protein of unknown function; Spider biofilm repressed	1.39778	0.00895
orf19.5266_1302	ORF19.5266		Planktonic growth-induced gene	1.3977	0.03729
orf19.7104_506	ORF19.7104		Adhesin-like cell wall protein; similar to mucins and to a Litomosoides microfilarial sheath protein; N-terminal secretion signal; rat catheter and Spider biofilm repressed	1.39767	0.14428
orf19.7448_1248	ORF19.7448	LYS9	Saccharopine dehydrogenase; lysine biosynthesis; soluble protein in hyphae; amphotericin B repressed; Gcn4-regulated; colony morphology-related gene regulation by Ssn6; protein present in exponential and stationary growth phase yeast	1.39686	0.09718
orf19.5346_1048	ORF19.5346		Ortholog(s) have role in transcription from RNA polymerase II promoter and transcription factor TFIID complex localization	1.39601	0.03329
orf19.6211_1582	ORF19.6211		Protein of unknown function; protein newly produced during adaptation to the serum	1.39589	0.17093
orf19.717_1550	ORF19.717	HSP60	Heat shock protein; soluble in hyphae; regulated by Nrg1 and by iron; induced in high iron; heavy metal (cadmium) stress-induced; sumoylation target; protein present in exponential and stationary phase cells; Hap43-repressed	1.39521	0.05803
orf19.1670_2389	ORF19.1670	BRO1	Class E vacuolar protein sorting factor; role in transport from multivesicular body to vacuole; not involved in Rim101 pathway; macrophage and pseudohyphal-repressed; flow model biofilm induced	1.39431	0.06235
orf19.4894_622	ORF19.4894		Protein with similarity to S. cerevisiae Yer010cp, a protein of unknown function belonging to the prokaryotic RraA family; repressed by benomyl; Hap43-induced; Spider biofilm induced	1.39395	0.10302
orf19.4089_1114	ORF19.4089	SGT1	Putative co-chaperone protein with a predicted role in kinetochore assembly; mutation confers hypersensitivity to radicicol; sumoylation target	1.39392	0.01966
orf19.5555_2050	ORF19.5555		Ortholog of C. dubliniensis CD36 : Cd36_63300, Candida tropicalis MYA-3404 : CTRG_05769 and Candida albicans WO-1 : CAWG_05077	1.39314	0.00231
orf19.7063_689	ORF19.7063	THG1	tRNA guanylyltransferase, with role in tRNA modification; catalyzes reverse (3'-5') nucleotide polymerization	1.39279	0.0369
orf19.6770_600	ORF19.6770		protein with ENTH Epsin domain, N-terminal; Spider biofilm repressed	1.39139	0.07957
orf19.5384_3246	ORF19.5384	CHS8	Chitin synthase required for synthesis of long-chitin fibrils; nonessential; 8 or 9 membrane spanning regions; mRNA present in yeast and hyphae; induced during cell wall regeneration; flow model biofilm repressed	1.39102	0.08559
orf19.409_572	ORF19.409		Ortholog of S. cerevisiae Aim38/Rcf2, cytochrome c oxidase subunit; plasma membrane localized; Hap43-repressed; induced in oralpharyngeal candidasis; flow model biofilm induced; Spider biofilm repressed	1.39063	0.01525
orf19.2379_285	ORF19.2379	NOT4	Putative E3 ubiquitin-protein ligase; required for maintenance, but not induction, of hyphal development; homozygous null mutant is avirulent in mouse systemic infection despite persistence in host; repressed in rat oral candidiasis	1.3899	0.02788
orf19.5394.1_295	ORF19.5394.1		Ortholog(s) have role in mitochondrial respiratory chain complex IV assembly and cytosol, integral to mitochondrial inner membrane, mitochondrial intermembrane space, nucleus localization	1.38948	0.02091
orf19.4457_4672	ORF19.4457	BNI4	Protein required for wild-type cell wall chitin distribution, morphology, hyphal growth; not essential; similar to S. cerevisiae Bni4p (targeting subunit for Glc7p phosphatase, involved in bud-neck localization of chitin synthase III)	1.38937	0.02221
orf19.3606_331	ORF19.3606		Ortholog of S. cereviae Sna4 vacuolar outer membrane protein that plays a role in sensitivity to NA+; induced by Mnl1 under weak acid stress	1.3891	0.01283
orf19.3684_731	ORF19.3684		Putative oxidoreductase; Spider biofilm induced	1.38754	0.06293
orf19.5000_1464	ORF19.5000	CYB2	Putative cytochrome b2 precursor; induced in high iron; alkaline repressed; colony morphology-related gene regulation by Ssn6; Hap43-repressed; pider biofilm induced	1.38725	0.03251
orf19.4875_430	ORF19.4875		Ortholog(s) have role in mRNA splicing, via spliceosome and U2-type spliceosomal complex localization	1.38678	0.0104
orf19.918_4478	ORF19.918	CDR11	Putative transporter of PDR subfamily of ABC family; Gcn4-regulated; induced by Rim101 at pH 8; Spider biofilm induced	1.38509	0.04234
orf19.1548_575	ORF19.1548		Ortholog(s) have role in mRNA splicing, via spliceosome and U4/U6 x U5 tri-snRNP complex localization	1.385	0.05297
orf19.2532_1104	ORF19.2532	PRS	Putative prolyl-tRNA synthetase; monofunctional Class II synthetase; gene is constitutively expressed	1.38495	0.07079
orf19.7678_5	ORF19.7678	ATP16	Subunit of the mitochondrial F1F0 ATP synthase; sumoylation target; protein newly produced during adaptation to the serum; Spider biofilm repressed	1.38397	0.05515
orf19.4896_444	ORF19.4896	RPA34	Putative RNA polymerase I subunit; rat catheter biofilm induced	1.38378	0.05081
orf19.4388_910	ORF19.4388		Protein with a histone fold domain; similar to TAFII47 proteins from S. cerevisiae, Danio rerio, Drosophila melanogaster, human, and mouse	1.3835	0.01092
orf19.5611_902	ORF19.5611		Predicted 3-methylbutanol:NAD(P) oxidoreductase and methylglyoxal reductase (NADPH-dependent); role in ergosterol metabolic process; early stage flow model biofilm induced; Spider biofilm induced	1.38327	0.00667
orf19.5612_2211	ORF19.5612	BMT4	Beta-mannosyltransferase; for elongation of beta-mannose chains on the acid-labile fraction of cell wall phosphopeptidomannan; 9-gene family member; regulated by Tsa1, Tsa1B; flow model biofilm induced; rat catheter biofilm repressed	1.3829	0.00276
orf19.1857_619	ORF19.1857		Putative L-azetidine-2-carboxylic acid acetyltransferase; mutants are viable	1.38281	0.02236
orf19.3737_999	ORF19.3737		Protein with a Vps9 vacuolar protein sorting protein domain; Hap43-repressed; repressed by ciclopirox olamine; Spider biofilm induced	1.38037	0.10901
orf19.1429_382	ORF19.1429	SOH1	Subunit of the RNA polymerase II mediator complex; involved in control of cytokinesis, morphogenesis, biofilm formation, virulence; cell-cycle regulated periodic mRNA expression	1.37958	0.05915
orf19.4390_1069	ORF19.4390		Protein of unknown function; repressed by alpha pheromone in SpiderM medium; transcript induced by Mnl1 under weak acid stress	1.37957	0.02876
orf19.3310_687	ORF19.3310		Protein of unknown function; Hap43-repressed; rat catheter and Spider biofilm induced	1.37782	0.08009
orf19.856_1241	ORF19.856	IFK2	Putative thiol-specific monooxygenase; mutant is viable; flow model biofilm induced	1.37782	0.02054
orf19.4123_4634	ORF19.4123		Putative THO complex subunit; possibly an essential gene, disruptants not obtained by UAU1 method; protein newly produced during adaptation to the serum	1.377	0.09153
orf19.2219_3568	ORF19.2219	ORF298	Predicted ORF in retrotransposon Tca3; similar to Gag-Pol; a-specific transcript, alpha-factor induced; rat catheter biofilm repressed; mRNA binds She3	1.37646	0.22399
orf19.4072_2107	ORF19.4072	IFF6	Putative GPI-anchored adhesin-like protein; opaque-specific transcript; macrophage-induced gene; Hap43-repressed gene; Spider biofilm induced	1.37604	0.04209
orf19.6209_786	ORF19.6209		Predicted membrane transporter; monocarboxylate porter (MCP) family, major facilitator superfamily (MFS); possibly essential, disruptants not obtained by UAU1 method; rat catheter and Spider biofilm induced	1.37363	0.06058
orf19.4730_625	ORF19.4730		Ortholog of S. cerevisiae : YNL050C, C. glabrata CBS138 : CAGL0G01276g, C. dubliniensis CD36 : Cd36_08220, C. parapsilosis CDC317 : CPAR2_804440 and Candida tenuis NRRL Y-1498 : CANTEDRAFT_94168	1.37323	0.01042
orf19.6021_236	ORF19.6021	IHD2	Protein of unknown function; induced during hyphae development; induced in low iron; Spider biofilm induced	1.37233	0.05119
orf19.3314_391	ORF19.3314	TRS20	Ortholog(s) have role in ER to Golgi vesicle-mediated transport and TRAPP complex, cytosol, nucleus localization	1.37183	0.01565
orf19.1923_634	ORF19.1923	RRN3	Protein with a predicted role in recruitment of RNA polymerase I to rDNA; caspofungin induced; flucytosine repressed; repressed in core stress response; repressed by prostaglandins	1.37174	0.02764
orf19.6182_2017	ORF19.6182	ZCF34	Zn(II)2Cys6 transcription factor involved in regulation of multidrug resistance via control of CDR1 expression; mutants display decreased colonization of mouse kidneys; required for yeast cell adherence to silicone substrate	1.37119	0.00699
orf19.6321_226	ORF19.6321	PGA48	Putative GPI-anchored adhesin-like protein; similar to S. cerevisiae Spi1p, which is induced at stationary phase; transcript induced in high iron; flow model biofilm induced; Spider biofilm repressed	1.371	0.02351
orf19.7450_1033	ORF19.7450		Ortholog(s) have role in cytokinesis, septin ring assembly and cellular bud neck septin ring localization	1.37085	0.03261
orf19.34_1207	ORF19.34	GIT1	Glycerophosphoinositol permease; involved in utilization of glycerophosphoinositol as a phosphate source; Rim101-repressed; virulence-group-correlated expression	1.37071	0.0025
orf19.7257_1134	ORF19.7257	MLH3	Ortholog(s) have role in meiotic mismatch repair, reciprocal meiotic recombination and MutLbeta complex localization	1.37053	0.038
orf19.5930_969	ORF19.5930		Ortholog(s) have nucleocytoplasmic transporter activity, structural constituent of nuclear pore activity	1.37052	0.17505
orf19.5700_321	ORF19.5700	TLO11	Member of a family of telomere-proximal genes of unknown function; may be spliced in vivo	1.36968	0.07141
orf19.4463_527	ORF19.4463		Ortholog of Candida albicans WO-1 : CAWG_01004	1.36926	0.02475
orf19.4880_1780	ORF19.4880		Protein of unknown function; flow model biofilm induced	1.3689	0.00934
orf19.2739_1112	ORF19.2739		Ortholog(s) have histone binding activity, role in DNA replication-dependent nucleosome assembly and CAF-1 complex, chromosome, centromeric region, nucleus localization	1.36841	0.02642
orf19.4779_1804	ORF19.4779		Putative transporter; slightly similar to the Sit1p siderophore transporter; Gcn4p-regulated; fungal-specific; induced by Mnl1p under weak acid stress	1.36824	0.02376
orf19.5368_1326	ORF19.5368		Ortholog of Vms1; component of a Cdc48-complex involved in protein quality control in S. cerevisiae; Spider biofilm repressed	1.36782	0.02224
orf19.6242_586	ORF19.6242	CYK3	Essential protein involved in cytokinesis; contains an SH3 domain	1.36652	0.02401
orf19.445_925	ORF19.445		Protein of unknown function; repressed by prostaglandins	1.36645	0.01362
orf19.2297_691	ORF19.2297	ARL3	Putative Ras superfamily GTPase; induced by nitric oxide independent of Yhb1p	1.36582	0.00136
orf19.6313.2_293	ORF19.6313.2	MVB12	ESCRT-I complex subunit with a role in multivesicular body (MVB) trafficking; mutant displays growth defect on alkaline medium; Hap43p-repressed gene	1.36581	0.05536
orf19.1414_595	ORF19.1414		Protein of unknown function; transcript is upregulated in an RHE model of oral candidiasis; Hap43-repressed	1.36548	0.02567
orf19.1667.1_143	ORF19.1667.1		Ortholog(s) have role in mitochondrial respiratory chain complex IV assembly and mitochondrial intermembrane space, nucleus localization	1.36518	0.02032
orf19.4204_835	ORF19.4204		Ortholog(s) have structural constituent of ribosome activity and mitochondrial small ribosomal subunit localization	1.36404	0.00464
orf19.2940_635	ORF19.2940		Putative v-SNARE of the endoplasmic reticulum membrane; possibly an essential gene, disruptants not obtained by UAU1 method	1.36308	0.08776
orf19.5664_1765	ORF19.5664	HOF1	Ortholog of S. cerevisiae Hof1; a protein localized to the bud neck and required for cytokinesis in S. cerevisiae; periodic mRNA expression, peak at cell-cycle G2/M phase; mutant is viable	1.36295	0.06777
orf19.3734_1139	ORF19.3734	GEF2	Member of the voltage chloride channel family; Hap43p-repressed gene	1.36251	0.17827
orf19.6234_1381	ORF19.6234		Putative U2 snRNP component; mutation confers hypersensitivity to 5-fluorocytosine (5-FC), 5-fluorouracil (5-FU), and tubercidin (7-deazaadenosine); Hap43-induced, Spider biofilm induced	1.36205	0.04433
orf19.5390_7	ORF19.5390		Ortholog of Candida albicans WO-1 : CAWG_02403	1.36181	0.12367
orf19.2504_3556	ORF19.2504	BMS1	Putative GTPase; Hap43-induced gene; mutation confers resistance to 5-fluorocytosine (5-FC); flucytosine induced; repressed by prostaglandins; Spider biofilm induced	1.36138	0.06011
orf19.6565_1066	ORF19.6565		Conserved mitochondrial inner membrane insertase; mediates insertion of mitochondrial- and nuclear-encoded proteins from the matrix into the inner membrane; Spider biofilm repressed	1.36099	0.07837
orf19.6445_822	ORF19.6445	ECI1	Protein similar to S. cerevisiae Eci1p, which is involved in fatty acid oxidation; transposon mutation affects filamentous growth; expression is regulated upon white-opaque switching	1.35945	0.106
orf19.1588_361	ORF19.1588		Putative mitochondrial protein of unknown function; regulated by Sef1p-, Sfu1p-, and Hap43p	1.35888	0.02424
orf19.6501_546	ORF19.6501		Ortholog of C. dubliniensis CD36 : Cd36_71960, Pichia stipitis Pignal : psti_CGOB_00136, Spathaspora passalidarum NRRL Y-27907 : SPAPADRAFT_63786 and Candida tropicalis MYA-3404 : CTRG_05049	1.35828	0.00277
orf19.4961_1514	ORF19.4961	STP2	Amino-acid-regulated transcription factor; activates transcription of amino acid permease genes; activated by amino-acid-induced proteolytic processing (Ssy1, Csh3 dependent); required for alkalinization of medium; Spider biofilm induced	1.35823	0.02807
orf19.6091_940	ORF19.6091	RIM8	Beta-arrestin-like protein; involved in pH response; required for pathogenesis, activation of Rim101 and alkaline pH-induced hyphal growth; colony morphology-related gene regulation by Ssn6p negative feedback regulation target	1.35802	0.03052
orf19.2989_722	ORF19.2989	GOR1	Ortholog(s) have glyoxylate reductase activity, role in glyoxylate catabolic process and cytosol, extracellular region, mitochondrion, nucleus localization	1.35782	0.01159
orf19.3583_212	ORF19.3583		Ortholog(s) have role in protein export from nucleus, regulation of chromatin silencing at telomere, ribosomal small subunit export from nucleus and cytosol, nuclear pore localization	1.35776	0.03276
orf19.3091_4176	ORF19.3091		Protein of unknown function; repressed during core stress response	1.35769	0.00781
orf19.1448.1_15	ORF19.1448.1		Ortholog(s) have plus-end-directed microtubule motor activity	1.35682	0.07226
orf19.1667.1_68	ORF19.1667.1		Ortholog(s) have role in mitochondrial respiratory chain complex IV assembly and mitochondrial intermembrane space, nucleus localization	1.35648	0.05643
orf19.1522_2881	ORF19.1522		Ortholog of C. dubliniensis CD36 : Cd36_16850, C. parapsilosis CDC317 : CPAR2_211990, Candida tenuis NRRL Y-1498 : cten_CGOB_00169 and Debaryomyces hansenii CBS767 : DEHA2G03036g	1.35638	0.06233
orf19.820_968	ORF19.820	SDS22	Putative protein serine-threonine phosphatase; macrophage/pseudohyphal-repressed	1.35593	0.0042
orf19.581_1761	ORF19.581		Putative RNA-binding protein; transcript is upregulated in an RHE model of oral candidiasis	1.35502	0.01739
orf19.1474_3392	ORF19.1474	SLA1	Protein required for assembly of the cortical actin cytoskeleton; contains three SH3 domains; transcription is regulated by Nrg1 and Mig1; flow model biofilm repressed	1.35419	0.04817
orf19.4932_1276	ORF19.4932		Ortholog(s) have role in mitochondrial translation and mitochondrion localization	1.35415	0.00267
orf19.7448_1173	ORF19.7448	LYS9	Saccharopine dehydrogenase; lysine biosynthesis; soluble protein in hyphae; amphotericin B repressed; Gcn4-regulated; colony morphology-related gene regulation by Ssn6; protein present in exponential and stationary growth phase yeast	1.35369	0.0822
orf19.6246_500	ORF19.6246		Ortholog(s) have peptide alpha-N-acetyltransferase activity, role in N-terminal peptidyl-methionine acetylation, cytoskeleton organization, mitochondrion inheritance and NatB complex, cytosol, nucleus localization	1.35342	0.02255
orf19.1030_355	ORF19.1030		Putative peptidyl-prolyl cis-trans isomerase	1.35317	0.01205
orf19.4875_257	ORF19.4875		Ortholog(s) have role in mRNA splicing, via spliceosome and U2-type spliceosomal complex localization	1.35257	0.00612
orf19.2739_1475	ORF19.2739		Ortholog(s) have histone binding activity, role in DNA replication-dependent nucleosome assembly and CAF-1 complex, chromosome, centromeric region, nucleus localization	1.35253	0.00501
orf19.3328_1369	ORF19.3328		Putative transcription factor; S. cerevisiae ortholog Hot1 is required for the transient induction of glycerol biosynthetic genes GPD1 and GPP2 in response to high osmolarity; filament induced	1.35184	0.04966
orf19.4021_474	ORF19.4021		Ortholog of C. dubliniensis CD36 : Cd36_54870, C. parapsilosis CDC317 : CPAR2_100250, Debaryomyces hansenii CBS767 : DEHA2D13992g and Pichia stipitis Pignal : PICST_40400	1.35154	0.03138
orf19.4245_822	ORF19.4245		Protein with a predicted pleckstrin domain; Hap43-repressed gene	1.35144	0.03812
orf19.4168_363	ORF19.4168		Ortholog(s) have ribonuclease MRP activity, ribonuclease P activity, role in intronic box C/D snoRNA processing, mRNA cleavage and nucleolar ribonuclease P complex, ribonuclease MRP complex localization	1.35133	0.08091
orf19.5384_3100	ORF19.5384	CHS8	Chitin synthase required for synthesis of long-chitin fibrils; nonessential; 8 or 9 membrane spanning regions; mRNA present in yeast and hyphae; induced during cell wall regeneration; flow model biofilm repressed	1.35132	0.04189
orf19.6726_657	ORF19.6726		Ortholog(s) have DNA secondary structure binding activity	1.35125	0.02035
orf19.2445_1588	ORF19.2445		Putative dicarboxylic amino acid permease; fungal-specific (no human or murine homolog); induced by alpha pheromone in SpiderM medium	1.35113	0.03849
orf19.7074_721	ORF19.7074		Ortholog(s) have RNA polymerase II transcription factor recruiting transcription factor activity, methylated histone residue binding activity	1.35005	0.04983
orf19.7635_1677	ORF19.7635	DRS1	Putative nucleolar DEAD-box protein; Hap43-induced; mutation confers hypersensitivity to 5-fluorouracil (5-FU), tubercidin (7-deazaadenosine); Tbf1-induced; repressed in core stress response	1.34911	0.08455
orf19.6589_907	ORF19.6589	SSF1	Protein involved in ribosome biogenesis; ortholog of S. cerevisiae Ssf1; Hap43-induced; rat catheter and Spider biofilm induced	1.349	0.00389
orf19.2089_787	ORF19.2089		Ortholog of Nyv1, v-SNARE component of the vacuolar SNARE complex involved in vesicle fusion in S. cerevisiae; Hap43-repressed gene	1.34819	0.03661
orf19.4823_696	ORF19.4823	LIP6	Secreted lipase, member of family of lipase genes expressed differentially in response to carbon source and during infection; may have a role in nutrition and/or in creating an acidic microenvironment; induced on adherence to polystyrene	1.34807	0.04993
orf19.4869_1489	ORF19.4869	SFU1	GATA-type transcription factor; regulator of iron-responsive genes; represses iron utilization genes if iron is present; Hap43-repressed; promotes gastrointestinal commensalism in mice; Spider biofilm induced	1.34786	0.034
orf19.6156_296	ORF19.6156		Ortholog of S. cerevisiae : AIM11, C. glabrata CBS138 : CAGL0I04928g, C. dubliniensis CD36 : Cd36_80770, C. parapsilosis CDC317 : CPAR2_102260 and Candida tenuis NRRL Y-1498 : CANTEDRAFT_114262	1.34737	0.02728
orf19.1760_704	ORF19.1760	RAS1	RAS signal transduction GTPase; regulates cAMP and MAP kinase pathways; role in hyphal induction, virulence, apoptosis, heat-shock sensitivity; nonessential; plasma membrane-localized; complements viability of S. cerevisiae ras1 ras2 mutant	1.34681	0.01518
orf19.6731.1_110	ORF19.6731.1		Ortholog of C. dubliniensis CD36 : Cd36_87460, C. parapsilosis CDC317 : CPAR2_808260, Debaryomyces hansenii CBS767 : DEHA2F07084g and Pichia stipitis Pignal : psti_CGOB_00185	1.34679	0.01518
orf19.4568_2359	ORF19.4568	ZCF25	Putative Zn(II)2Cys6 transcription factor	1.34662	0.0142
orf19.7244_473	ORF19.7244		Putative fumarylacetoacetate hydrolase; induced by nitric oxide independent of Yhb1; regulated by Sef1, Sfu1, Hap43; flow model biofilm induced	1.34661	0.0376
orf19.7257_1009	ORF19.7257	MLH3	Ortholog(s) have role in meiotic mismatch repair, reciprocal meiotic recombination and MutLbeta complex localization	1.34436	0.04635
orf19.5501_467	ORF19.5501	YAF9	Subunit of the NuA4 histone acetyltransferase complex; transcript regulated by Mig1; possibly an essential gene, disruptants not obtained by UAU1 method	1.34395	0.07218
orf19.7291_880	ORF19.7291		Ortholog(s) have tRNA (adenine-N1-)-methyltransferase activity, role in tRNA methylation and cytosol, nucleus, tRNA (m1A) methyltransferase complex localization	1.34378	0.01352
orf19.2415_1471	ORF19.2415		Ortholog(s) have role in mitochondrial translation and mitochondrion localization	1.34335	0.02244
orf19.7544_490	ORF19.7544	TLO1	Member of a family of telomere-proximal genes of unknown function; hypha-induced expression; rat catheter biofilm repressed	1.34333	0.00441
orf19.5278_896	ORF19.5278		Protein of unknown function; Spider biofilm induced	1.34297	0.07565
orf19.5938_4811	ORF19.5938	SEN1	Putative helicase; repressed by prostaglandins	1.3419	0.04331
orf19.3105_1286	ORF19.3105		Putative cytochrome P450 protein; possibly an essential gene, disruptants not obtained by UAU1 method	1.34187	0.01947
orf19.7131_313	ORF19.7131		Butyrobetaine dioxygenase, the fourth enzyme of the carnitine biosynthesis pathway	1.3401	0.06419
orf19.692_1270	ORF19.692		Protein of unknown function; Hap43-repressed gene; rat catheter and Spider biofilm induced	1.33971	0.07851
orf19.6027_820	ORF19.6027		Ortholog of C. dubliniensis CD36 : Cd36_00740, C. parapsilosis CDC317 : CPAR2_110170, Candida tenuis NRRL Y-1498 : CANTEDRAFT_133175 and Debaryomyces hansenii CBS767 : DEHA2D09724g	1.33942	0.11788
orf19.5030_841	ORF19.5030	DOS2	Protein of unknown function; induced during planktonic growth	1.33934	0.06946
orf19.7215.3_211	ORF19.7215.3		Ortholog(s) have chaperone binding, unfolded protein binding activity, role in protein refolding and mitochondrial matrix localization	1.33902	0.0935
orf19.329_1244	ORF19.329		Putative pre-mRNA branch point binding protein; role in mRNA splicing via spliceosome; Spider biofilm repressed	1.33802	0.05281
orf19.3507_680	ORF19.3507	MCR1	NADH-cytochrome-b5 reductase; soluble in hyphae; alkaline downregulated; farnesol, ketoconazole or flucytosine induced; protein present in exponential and stationary growth phase yeast; YNB biofilm induced; rat catheter biofilm repressed	1.33718	0.02624
orf19.6009_2970	ORF19.6009	SET1	Lysine histone methyltransferase; methylates histone H3 K4; regulates of white-opaque switch, epithelial cell adhesion, agar-embedded filamentation, virulence in mice; unique N-terminus immunogenic in human; rat catheter biofilm repressed	1.33705	0.00307
orf19.6021_441	ORF19.6021	IHD2	Protein of unknown function; induced during hyphae development; induced in low iron; Spider biofilm induced	1.33652	0.06316
orf19.5215_923	ORF19.5215	TES15	Putative acyl-CoA thioesterase; Hap43-repressed; Spider biofilm induced	1.3364	0.17642
orf19.4044_592	ORF19.4044	MUM2	Protein similar to S. cerevisiae Mum2, a protein essential for meiotic DNA replication and sporulation; induced by alpha pheromone in SpiderM medium; transcript regulated by Tup1	1.33621	0.04395
orf19.2812_368	ORF19.2812		Protein of unknown function; Spider biofilm induced	1.33599	0.06649
orf19.921_799	ORF19.921	HMS1	hLh domain Myc-type transcript factor; required for morphogenesis induced by elevated temperature or Hsp90 compromise; acts downstream of Pcl1; Spider biofilm induced	1.3358	0.04957
orf19.6534.2_1639	ORF19.6534.2	CRN1	Coronin; cortical actin cytoskeletal component; predicted role in regulation of actin patch assembly; rat catheter and Spider biofilm repressed	1.33534	0.03866
orf19.2319_1474	ORF19.2319		Putative nucleolar protein with a predicted role in pre-rRNA processing; Hap43-induced gene; repressed in core stress response	1.33518	0.06027
orf19.2319_1633	ORF19.2319		Putative nucleolar protein with a predicted role in pre-rRNA processing; Hap43-induced gene; repressed in core stress response	1.33501	0.07024
orf19.7668_1253	ORF19.7668	MAL2	Alpha-glucosidase; hydrolyzes sucrose for sucrose utilization; transcript regulated by Suc1, induced by maltose, repressed by glucose; Tn mutation affects filamentous growth; upregulated in RHE model; rat catheter and Spider biofilm induced	1.33486	0.02991
orf19.1414_768	ORF19.1414		Protein of unknown function; transcript is upregulated in an RHE model of oral candidiasis; Hap43-repressed	1.33461	0.02421
orf19.3260_2065	ORF19.3260		Ortholog(s) have phosphopantothenoylcysteine decarboxylase activity, role in coenzyme A biosynthetic process, response to salt stress and phosphopantothenoylcysteine decarboxylase complex localization	1.33439	0.00711
orf19.3612_422	ORF19.3612	PST2	Putative NADH:quinone oxidoreductase; similar to 1,4-benzoquinone reductase; immunogenic in mice; induced by benomyl, oxidative stress via Cap1; fungal-specific; farnesol-repressed; Spider biofilm induced	1.33439	0.11235
orf19.3604_79	ORF19.3604		Ortholog(s) have nucleus localization	1.33434	0.02877
orf19.2261_715	ORF19.2261		Ortholog(s) have RNA binding activity, role in mRNA splicing, via spliceosome and U2 snRNP, U2-type prespliceosome, cytosol localization	1.33432	0.00067
orf19.1934_1405	ORF19.1934	HST3	Histone H3K56 deacetylase; reduced copy number increases opaque cell formation; repressed by MMS, hydroxyurea and high-levels of hydrogen peroxide; Hap43p-induced; ectopic expression blocks genotoxin-induced switching; nicotinamide target	1.33421	0.02583
orf19.5402_124	ORF19.5402		Ortholog of Candida albicans WO-1 : CAWG_02394	1.33387	0.00429
orf19.581_1632	ORF19.581		Putative RNA-binding protein; transcript is upregulated in an RHE model of oral candidiasis	1.33316	0.05224
orf19.2564_621	ORF19.2564		Putative nucleolar protein; implicated in ribosome biogenesis; rat catheter biofilm repressed	1.33303	0.0005
orf19.660_1744	ORF19.660		Protein of unknown function; mRNA binds She3	1.33282	0.01959
orf19.3848_1111	ORF19.3848		Ortholog of C. dubliniensis CD36 : Cd36_31420, C. parapsilosis CDC317 : CPAR2_205100, Debaryomyces hansenii CBS767 : DEHA2G10648g and Pichia stipitis Pignal : PICST_32997	1.33243	0.04753
orf19.2088_438	ORF19.2088		Putative DNA polymerase epsilon subunit D; null mutant is viable but slow-growing and displays abnormal invasive growth on SD and YPD media; Spider biofilm repressed	1.33224	0.02081
orf19.1144_3299	ORF19.1144		Protein with SEL-1 like protein domain; early-stage flow model biofilm induced	1.33202	0.0135
orf19.2614_475	ORF19.2614	RSR1	RAS-related protein; GTP/GDP cycling required for wild-type polar bud site selection, hyphal growth guidance; role in systemic virulence in mouse; geranylgeranylation predicted; suppresses S. cerevisiae cdc24-4 mutant heat sensitivity	1.33142	0.01832
orf19.1617_686	ORF19.1617		Protein similar to S. cerevisiae Ydr282cp; transposon mutation affects filamentous growth; Hap43p-repressed gene	1.33106	0.01756
orf19.2297_593	ORF19.2297	ARL3	Putative Ras superfamily GTPase; induced by nitric oxide independent of Yhb1p	1.33077	0.00998
orf19.4051_1198	ORF19.4051	HTS1	Putative tRNA-His synthetase; downregulated upon phagocytosis by murine macrophage; stationary phase enriched protein; Spider biofilm repressed	1.33058	0.00876
orf19.7104_785	ORF19.7104		Adhesin-like cell wall protein; similar to mucins and to a Litomosoides microfilarial sheath protein; N-terminal secretion signal; rat catheter and Spider biofilm repressed	1.33046	0.07998
orf19.2389_998	ORF19.2389		Ortholog(s) have DNA replication origin binding, single-stranded DNA binding activity	1.32997	0.01789
orf19.4330_1457	ORF19.4330		Ortholog of C. dubliniensis CD36 : Cd36_52790, Candida tropicalis MYA-3404 : CTRG_05968 and Candida albicans WO-1 : CAWG_04684	1.32965	0.07999
orf19.1508_78	ORF19.1508		Protein of unknown function; transcript detected on high-resolution tiling arrays	1.32936	0.00386
orf19.4851_907	ORF19.4851	TFA1	Protein with polyglutamate motifs and abundant Ser/Thr residues; described as a subunit of TFIIE, which is a basal transcription initiation factor of RNA Polymerase II; possibly an essential gene, disruptants not obtained by UAU1 method	1.32932	0.01303
orf19.5389_1627	ORF19.5389	FKH2	Forkhead transcription factor; morphogenesis regulator; required for wild-type hyphal transcription, cell separation, and for virulence in cell culture; mutant lacks true hyphae, is constitutively pseudohyphal; upregulated in RHE model	1.32887	0.06824
orf19.2414_828	ORF19.2414		Ortholog of S. cerevisiae Mpm1; a mitochondrial intermembrane space protein of unknown function; Hap43-repressed; Spider biofilm induced	1.32867	0.00243
orf19.6119_1883	ORF19.6119		Protein of unknown function; Spider biofilm repressed	1.32847	0.05153
orf19.976_1987	ORF19.976	BRE1	Putative transcription factor with C3HC4 zinc finger DNA-binding motif; similar to S. cerevisiae Bre1p; transposon mutation affects filamentous growth	1.32845	0.16512
orf19.7131_1165	ORF19.7131		Butyrobetaine dioxygenase, the fourth enzyme of the carnitine biosynthesis pathway	1.32803	0.04503
orf19.4018_697	ORF19.4018		Ortholog(s) have structural constituent of ribosome activity and mitochondrial small ribosomal subunit localization	1.32787	0.0018
orf19.5216_74	ORF19.5216		Has domain(s) with predicted acyl-CoA hydrolase activity and role in acyl-CoA metabolic process	1.32765	0.01024
orf19.7539_589	ORF19.7539	INO2	Transcriptional activator that forms a heterodimer with Ino4p; likely regulates genes involved in phosphatidylcholine and phosphatidylinositol biosynthesis, fatty acid beta-oxidation, and peroxisome biogenesis	1.32746	0.01082
orf19.4623_108	ORF19.4623		Protein of unknown function; Spider biofilm repressed	1.32678	0.3155
orf19.4024_649	ORF19.4024	RIB5	Putative riboflavin synthase; fungal-specific (no human or murine homolog); farnesol-downregulated; protein present in exponential and stationary growth phase yeast cultures	1.32664	0.03672
orf19.3314_198	ORF19.3314	TRS20	Ortholog(s) have role in ER to Golgi vesicle-mediated transport and TRAPP complex, cytosol, nucleus localization	1.32609	0.03806
orf19.6090_215	ORF19.6090		Putative nucleolar protein with a predicted role in pre-rRNA processing and ribosome biogenesis; repressed by nitric oxide; required for flow model biofilm formation; Spider biofilm repressed	1.32595	0.01471
orf19.5705_2479	ORF19.5705	NAM2	Mitochondrial leucyl-tRNA synthetase	1.32583	0.00513
orf19.1146_310	ORF19.1146		Ortholog of Candida albicans WO-1 : CAWG_00265	1.32539	0.04855
orf19.3664_629	ORF19.3664	HSP31	Putative 30 kda heat shock protein; repressed during the mating process; rat catheter biofilm induced	1.32457	0.30683
orf19.5595_1202	ORF19.5595	SHE3	mRNA-binding protein that localizes specific mRNAs to daughter yeast cells and to hyphal tips; required for normal filamentation and host epithelial cell damage; ortholog of S. cerevisiae She3 but target mRNAs differs	1.32457	0.00343
orf19.6211_1483	ORF19.6211		Protein of unknown function; protein newly produced during adaptation to the serum	1.32447	0.28577
orf19.6790_2525	ORF19.6790		Ortholog(s) have mRNA binding activity, role in 3'-UTR-mediated mRNA destabilization, mitochondrion organization and cytoplasmic mRNA processing body, cytoplasmic stress granule, cytosol, perinuclear region of cytoplasm localization	1.32426	0.06816
orf19.4894_553	ORF19.4894		Protein with similarity to S. cerevisiae Yer010cp, a protein of unknown function belonging to the prokaryotic RraA family; repressed by benomyl; Hap43-induced; Spider biofilm induced	1.32421	0.06489
orf19.1805_899	ORF19.1805	PEX14	Ortholog(s) have peroxisome matrix targeting signal-1 binding, peroxisome matrix targeting signal-2 binding, protein binding, bridging activity	1.32392	0.03482
orf19.7085_1241	ORF19.7085		Protein of unknown function; induced in core stress response; induced by cadmium stress via Hog1; oxidative stress-induced via Cap1; induced by Mnl1 under weak acid stress; macrophage-repressed; rat catheter and Spider biofilm induced	1.32375	0.19262
orf19.6268_888	ORF19.6268		Putative cohesin complex subunit; expression downregulated in an ssr1 null mutant	1.32303	0.02845
orf19.5210_1673	ORF19.5210		Putative Xbp1 transcriptional repressor; binds to cyclin gene promoters in S. cerevisiae; Hap43-repressed; possibly essential, disruptants not obtained by UAU1 method	1.32279	0.00762
orf19.6014_374	ORF19.6014	RRS1	Putative ribosome biogenesis and nuclear export protein; Hap43p-induced gene; mutation confers hypersensitivity to 5-fluorocytosine (5-FC), 5-fluorouracil (5-FU), and tubercidin (7-deazaadenosine)	1.32213	0.01949
orf19.2180_72	ORF19.2180		Ortholog(s) have calcium ion binding, zinc ion binding activity, role in axial cellular bud site selection, bipolar cellular bud site selection, regulation of COPII vesicle coating and cellular bud neck, cytosol, nucleus localization	1.31999	0.06826
orf19.763_320	ORF19.763		Small subunit of the heterodimeric cap binding complex; component of the spliceosomal commitment complex; Spider biofilm repressed	1.3199	0.01577
orf19.4560_1256	ORF19.4560	BFR1	Protein involved in the maintenance of normal ploidy; S. cerevisiae ortholog cofers Brefeldin A resistance; stationary phase enriched protein; Spider biofilm repressed	1.31973	0.02018
orf19.1934_1319	ORF19.1934	HST3	Histone H3K56 deacetylase; reduced copy number increases opaque cell formation; repressed by MMS, hydroxyurea and high-levels of hydrogen peroxide; Hap43p-induced; ectopic expression blocks genotoxin-induced switching; nicotinamide target	1.31952	0.05901
orf19.6009_2839	ORF19.6009	SET1	Lysine histone methyltransferase; methylates histone H3 K4; regulates of white-opaque switch, epithelial cell adhesion, agar-embedded filamentation, virulence in mice; unique N-terminus immunogenic in human; rat catheter biofilm repressed	1.31908	0.00691
orf19.1544_712	ORF19.1544		Putative cis-golgi localized protein involved in ER to Golgi transport; Spider biofilm repressed	1.31882	0.02694
orf19.1122_754	ORF19.1122		Protein of unknown function; induced by alpha pheromone in SpiderM medium; Spider biofilm induced	1.31872	0.01882
orf19.6092_2710	ORF19.6092	KEL1	Kelch repeat domain-containing protein; localizes to sites of polarized growth; mutant colonies exhibit slightly decreased filamentation ratio; not required for buccal epithelial cell adherence or virulence in mice	1.31847	0.02359
orf19.3809_1948	ORF19.3809	BAS1	Putative Myb-like transcription factor; ortholog S. cerevisiae Bas1, a regulator of purine biosynthetic genes; mutant exhibits adenine auxotrophy and abnormal colony morphology	1.31792	0.03971
orf19.6905_190	ORF19.6905		Ortholog of S. cerevisiae : YNL011C, C. glabrata CBS138 : CAGL0H03619g, C. dubliniensis CD36 : Cd36_71090, C. parapsilosis CDC317 : CPAR2_300420 and Candida tenuis NRRL Y-1498 : CANTEDRAFT_111980	1.31773	0.07159
orf19.5528_742	ORF19.5528	MOB1	Putative mitotic exit network component; periodic mRNA expression, peak at cell-cycle G2/M phase	1.31748	0.05594
orf19.2046_1090	ORF19.2046	POT1-2	Putative peroxisomal 3-ketoacyl CoA thiolase; Hap43-repressed	1.31739	0.02296
orf19.6091_1803	ORF19.6091	RIM8	Beta-arrestin-like protein; involved in pH response; required for pathogenesis, activation of Rim101 and alkaline pH-induced hyphal growth; colony morphology-related gene regulation by Ssn6p negative feedback regulation target	1.31738	0.02232
orf19.4120_1419	ORF19.4120	LAS1	Putative bud formation and morphogenesis protein; mutation confers hypersensitivity to 5-fluorocytosine (5-FC), 5-fluorouracil (5-FU); macrophage-induced; Spider biofilm induced	1.31732	0.00803
orf19.7006_2957	ORF19.7006		Ortholog(s) have role in reciprocal meiotic recombination	1.31641	0.01202
orf19.7537_4398	ORF19.7537	BNR1	Formin; probable role in hyphal cytoskeletal polarity; synthetic lethality if Bnr1p and Bni1p are absent	1.31597	0.02413
orf19.6110_180	ORF19.6110		Ortholog of Candida albicans WO-1 : CAWG_01361	1.31498	0.04343
orf19.2333_1432	ORF19.2333		Ortholog(s) have role in retrograde transport, endosome to Golgi and cytosol, late endosome, nucleus localization	1.31496	0.05484
orf19.842_271	ORF19.842	ASR3	Adenylyl cyclase and stress responsive protein; induced in cyr1 or ras1 mutant; Spider biofilm induced	1.31495	0.11021
orf19.863_1071	ORF19.863		Ortholog(s) have structural constituent of ribosome activity and mitochondrial large ribosomal subunit localization	1.31474	0.01426
orf19.7520_123	ORF19.7520	POT1	Putative peroxisomal 3-oxoacyl CoA thiolase; transcript regulated by Nrg1 and Mig1; farnesol regulated; Hap43-repressed	1.31448	0.06844
orf19.6065_820	ORF19.6065		RNA polymerase II holoenzyme/mediator subunit; regulated by Mig1, Tup1; amphotericin B, caspofungin repressed; protein present in exponential and stationary growth phase yeast; Hap43-repressed; Spider biofilm repressed	1.3144	0.01756
orf19.3848_1226	ORF19.3848		Ortholog of C. dubliniensis CD36 : Cd36_31420, C. parapsilosis CDC317 : CPAR2_205100, Debaryomyces hansenii CBS767 : DEHA2G10648g and Pichia stipitis Pignal : PICST_32997	1.31438	0.00261
orf19.3685_1638	ORF19.3685	PSY2	Putative protein phosphatase PP4 complex subunit; macrophage-induced gene	1.31432	0.02021
orf19.7680_261	ORF19.7680	CTA26	Putative transcription factor/activator; Med2 mediator complex ddomain; transcript is upregulated in an RHE model of oral candidiasis; member of a family of telomere-proximal genes; Efg1, Hap43-repressed	1.31356	0.00626
orf19.6275_1481	ORF19.6275		Ortholog(s) have cytosol localization	1.31329	0.01369
orf19.3312_1549	ORF19.3312		Protein of unknown function; flow model and Spider biofilm repressed	1.31311	0.04225
orf19.3895_536	ORF19.3895	CHT2	GPI-linked chitinase; required for normal filamentous growth; repressed in core caspofungin response; fluconazole, Cyr1, Efg1, pH-regulated; mRNA binds She3 and is localized to yeast-form buds and hyphal tips; Spider biofilm repressed	1.31298	0.1892
orf19.4023_114	ORF19.4023	MRP2	Protein similar to S. cerevisiae Mrp2p, which is a component of the small subunit of the mitochondrial ribosome; transposon mutation affects filamentous growth	1.3126	0.10105
orf19.497_927	ORF19.497	EAF7	Subunit of the NuA4 histone acetyltransferase complex	1.31244	0.00204
orf19.3550_1183	ORF19.3550	SGO1	Component of the spindle checkpoint; cell-cycle regulated periodic mRNA expression	1.31208	0.03636
orf19.1082.1_94	ORF19.1082.1		Ortholog(s) have cytochrome-c oxidase activity, role in mitochondrial respiratory chain complex IV assembly and cytosol, mitochondrial intermembrane space, mitochondrial respiratory chain complex IV, nucleus localization	1.31192	0.02013
orf19.6084_561	ORF19.6084		Protein of unknown function; flow model biofilm induced; Spider biofilm induced	1.31136	0.09416
orf19.5005_1814	ORF19.5005	OSM2	Putative mitochondrial fumarate reductase; regulated by Ssn6p, Gcn2p, and Gcn4p; Hog1p-downregulated; stationary phase enriched protein; Hap43p-repressed gene	1.31132	0.02735
orf19.6944_455	ORF19.6944	PHB1	Putative prohibitin; identified in detergent-resistant membrane fraction (possible lipid raft component); predicted N-terminal acetylation; Hap43p-repressed gene	1.31121	0.02122
orf19.2256_538	ORF19.2256		Ortholog(s) have cytosol, nucleus localization	1.31119	0.02118
orf19.2528_1863	ORF19.2528		Putative RNA polymerase III transcription factor (TFIIIB) subunit; flucytosine repressed	1.31104	0.00196
orf19.5306_90	ORF19.5306		Ortholog of C. dubliniensis CD36 : Cd36_43820 and Candida albicans WO-1 : CAWG_03393	1.31096	0.22803
orf19.3319_925	ORF19.3319		Putative thioredoxin; Spider biofilm repressed	1.31069	0.00916
orf19.6923.1_157	ORF19.6923.1		Ortholog of C. parapsilosis CDC317 : CPAR2_502850, Candida tenuis NRRL Y-1498 : CANTEDRAFT_135869, Debaryomyces hansenii CBS767 : DEHA2F18260g and Pichia stipitis Pignal : psti_CGOB_00119	1.31051	0.10363
orf19.7115_1709	ORF19.7115	SAC7	Putative GTPase activating protein (GAP) for Rho1; repressed upon adherence to polystyrene; macrophage/pseudohyphal-repressed; transcript is upregulated in RHE model of oral candidiasis and in clinical oral candidiasis	1.31035	0.0336
orf19.371_698	ORF19.371		Ortholog of C. dubliniensis CD36 : Cd36_40110, C. parapsilosis CDC317 : CPAR2_402300, Candida tenuis NRRL Y-1498 : CANTEDRAFT_94507 and Debaryomyces hansenii CBS767 : DEHA2F05588g	1.30971	0.03471
orf19.1428_329	ORF19.1428	DUO1	Subunit of the Dam1 (DASH) complex, which acts in chromosome segregation by coupling kinetochores to spindle microtubules	1.3094	0.06101
orf19.1646_2467	ORF19.1646		Ortholog(s) have rRNA primary transcript binding activity	1.30934	0.00606
orf19.5796_1435	ORF19.5796	SHE9	Protein with similarity to S. cerevisiae She9p, which inhibits growth when overproduced; gene has possible growth-regulation element; fungal-specific (no human or murine homolog)	1.30919	0.05992
orf19.7635_1520	ORF19.7635	DRS1	Putative nucleolar DEAD-box protein; Hap43-induced; mutation confers hypersensitivity to 5-fluorouracil (5-FU), tubercidin (7-deazaadenosine); Tbf1-induced; repressed in core stress response	1.30792	0.0771
orf19.7380_1024	ORF19.7380		Has domain(s) with predicted nucleic acid binding, nucleotide binding activity	1.30791	0.01181
orf19.5564_614	ORF19.5564		Ortholog(s) have nucleolus localization	1.30791	0.03042
orf19.409_360	ORF19.409		Ortholog of S. cerevisiae Aim38/Rcf2, cytochrome c oxidase subunit; plasma membrane localized; Hap43-repressed; induced in oralpharyngeal candidasis; flow model biofilm induced; Spider biofilm repressed	1.30774	0.00629
orf19.4054_496	ORF19.4054	CTA24	Putative transcription factor; positive regulator of gene expression; Efg1-repressed; member of a family of telomere-proximal genes; transcript upregulated in RHE model of oral candidiasis	1.3074	0.02653
orf19.2770_255	ORF19.2770		Ortholog of C. dubliniensis CD36 : Cd36_42220, C. parapsilosis CDC317 : CPAR2_500340, Debaryomyces hansenii CBS767 : DEHA2G17754g and Pichia stipitis Pignal : PICST_31424	1.30739	0.03994
orf19.6260_3634	ORF19.6260		Ubiquitin-specific protease; cleaves ubiquitin from ubiquitinated proteins; Spider biofilm induced	1.30671	0.02459
orf19.4958_1625	ORF19.4958	ECM25	Non-essential protein involved in cell morphogenesis	1.30643	0.04754
orf19.1415_1964	ORF19.1415	FRE10	Major cell-surface ferric reductase under low-iron conditions; 7 transmembrane regions and a secretion signal predicted; Tup1, Rim101, Ssn6, Hog1, caspofungin repressed; ciclopirox olamine induced; rat catheter biofilm induced	1.3063	0.03365
orf19.5850_2008	ORF19.5850	NOC2	Putative nucleolar complex protein; Hap43-induced; transposon mutation affects filamentous growth; mutation confers hypersensitivity to 5-fluorouracil (5-FU), tubercidin (7-deazaadenosine); repressed in core stress response	1.30573	0.04211
orf19.7670_1567	ORF19.7670		Putative Ca2+/H+ antiporter; oral infection upregulated gene; mutants have reduced capacity to damage oral epithelial cells	1.30564	0.1647
orf19.376_1189	ORF19.376		Protein of unknown function; Hap43-repressed; Spider biofilm induced	1.30563	0.03718
orf19.4919_327	ORF19.4919		Has domain(s) with predicted DNA binding, nucleic acid binding activity	1.30528	0.04891
orf19.6668_379	ORF19.6668		Ortholog(s) have ubiquitin-protein ligase activator activity and role in ER-associated ubiquitin-dependent protein catabolic process, establishment of protein localization to endoplasmic reticulum membrane	1.30525	0.00132
orf19.2823_1657	ORF19.2823	RFG1	HMG domain transcriptional repressor of filamentous growth and hyphal genes; in Tup1-dependent and -independent pathways; binds DNA; transcript not regulated by oxygen or serum; not responsible for hypoxic repression; Spider biofilm induced	1.30491	0.01087
orf19.5311_2349	ORF19.5311		Ortholog of C. dubliniensis CD36 : Cd36_43850, C. parapsilosis CDC317 : CPAR2_402060, Pichia stipitis Pignal : PICST_68242, Candida tropicalis MYA-3404 : CTRG_00303 and Candida albicans WO-1 : CAWG_03390	1.30484	0.03741
orf19.5930_783	ORF19.5930		Ortholog(s) have nucleocytoplasmic transporter activity, structural constituent of nuclear pore activity	1.30414	0.18484
orf19.5844_278	ORF19.5844		Ortholog(s) have role in meiotic DNA recombinase assembly, reciprocal meiotic recombination and condensed nuclear chromosome localization	1.30411	0.01664
orf19.945_405	ORF19.945	VPS2	Ortholog(s) have role in intralumenal vesicle formation, protein retention in Golgi apparatus, protein targeting to vacuole involved in ubiquitin-dependent protein catabolic process via the multivesicular body sorting pathway	1.30395	0.05555
orf19.7664_275	ORF19.7664		Ortholog(s) have nucleolus localization	1.30387	0.02381
orf19.1201_1310	ORF19.1201		Ortholog(s) have serine-tRNA ligase activity, role in invasive growth in response to glucose limitation, mitochondrial seryl-tRNA aminoacylation, pseudohyphal growth, spore germination and mitochondrion localization	1.30386	0.08553
orf19.3881_1021	ORF19.3881		Ortholog of C. dubliniensis CD36 : Cd36_31790, C. parapsilosis CDC317 : CPAR2_204900, Candida tenuis NRRL Y-1498 : CANTEDRAFT_136864 and Debaryomyces hansenii CBS767 : DEHA2F13200g	1.30356	0.08048
orf19.5230_952	ORF19.5230	MRPS9	Mitochondrial ribosomal protein S9; has N-terminal mitochondrial targeting signal and an S9 consensus motif; overexpression in S. cerevisiae causes respiratory defect that is reversible upon cessation of C. albicans gene expression	1.30349	0.03317
orf19.3578_348	ORF19.3578		Ortholog of C. dubliniensis CD36 : Cd36_19950, C. parapsilosis CDC317 : CPAR2_104135, Candida tenuis NRRL Y-1498 : cten_CGOB_00075 and Debaryomyces hansenii CBS767 : DEHA2F07964g	1.30328	0.09816
orf19.7112_1720	ORF19.7112	FRP2	Putative ferric reductase; alkaline induced by Rim101; fluconazole-downregulated; upregulated in the presence of human neutrophils; possibly adherence-induced; regulated by Sef1, Sfu1, and Hap43	1.30311	0.03468
orf19.3167_1315	ORF19.3167		Heme A:farnesyltransferase; catalyzes the 1st step in conversion of protoheme to the heme A prosthetic group required for cytochrome c oxidase activity; Spider biofilm repressed	1.30289	0.02613
orf19.7667_686	ORF19.7667	IAH1	Protein similar to S. cerevisiae Iah1p, which is involved in acetate metabolism; mutation confers hypersensitivity to tunicamycin; transposon mutation affects filamentous growth	1.3028	0.04645
orf19.7221_2948	ORF19.7221	SET3	NAD-dependent histone deacetylase; mutations affect filamentous growth; genetic evidence suggests Set3/Hos2 function as a complex to regulate white-opaque switching, morphogenesis, and virulence; flow model biofilm induced	1.30273	0.03065
orf19.69_609	ORF19.69		Protein of unknown function; induced by Mnl1 under weak acid stress	1.30259	0.13769
orf19.1923_1132	ORF19.1923	RRN3	Protein with a predicted role in recruitment of RNA polymerase I to rDNA; caspofungin induced; flucytosine repressed; repressed in core stress response; repressed by prostaglandins	1.30245	0.03565
orf19.3922_671	ORF19.3922		Possible pyrimidine 5' nucleotidase; protein present in exponential and stationary growth phase yeast cultures; Hap43p-repressed gene	1.30233	0.06054
orf19.3623_3224	ORF19.3623	SMC2	Protein similar to S. cerevisiae Smc2p, which is a component of the condensin complex involved in mitotic chromosome condensation; induced under hydroxyurea treatment	1.3019	0.00525
orf19.4878_1439	ORF19.4878		Protein of unknown function; Hap43-repressed; rat catheter biofilm repressed	1.30184	0.01932
orf19.1690_1263	ORF19.1690	TOS1	Protein similar to alpha agglutinin anchor subunit; secreted; exogenously expressed protein is a substrate for Kex2 processing in vitro; fluconazole-induced; induced by alpha pheromone in SpiderM medium; Hap43-induced	1.30168	0.01518
orf19.2320_1308	ORF19.2320		Putative serine/threonine-protein kinase; possibly an essential gene, disruptants not obtained by UAU1 method	1.30119	0.01507
orf19.6730_488	ORF19.6730		Ortholog(s) have nucleolus localization	1.30118	0.02115
orf19.807_1561	ORF19.807	CHS5	Putative chitin biosynthesis protein; fungal-specific; repressed upon yeast-to-hypha switch; rat catheter biofilm repressed	1.30097	0.01712
orf19.3567_860	ORF19.3567	BIO32	Putative class III aminotransferase with a predicted role in biotin biosynthesis; Spider biofilm induced	1.3009	0.0098
orf19.5609_1003	ORF19.5609		Ortholog of C. dubliniensis CD36 : Cd36_63840, C. parapsilosis CDC317 : CPAR2_601510, Debaryomyces hansenii CBS767 : DEHA2A06270g and Pichia stipitis Pignal : PICST_31363	1.30071	0.04591
orf19.5728_1079	ORF19.5728		Putative cytochrome P450; Spider biofilm induced	1.30033	0.07502
orf19.3315_1008	ORF19.3315	CTA9	Protein required for normal filamentous growth; induced during the mating process; mRNA binds She3; activates transcription in 1-hybrid assay in S. cerevisiae	1.29997	0.00533
orf19.2862_959	ORF19.2862	RIB1	Putative GTP cyclohydrolase II; enzyme of riboflavin biosynthesis; fungal-specific (no human or murine homolog); regulated by Sef1p-, Sfu1p-, and Hap43p	1.2997	0.02945
orf19.4299_1141	ORF19.4299	MSW1	Protein similar to S. cerevisiae Msw1p, which is mitochondrial tryptophanyl-tRNA synthetase; Hap43p-repressed gene; likely to be essential for growth, based on an insertional mutagenesis strategy	1.29945	0.06005
orf19.998_257	ORF19.998		Putative adapter protein; links synaptojanins Inp52 and Inp53 to the cortical actin cytoskeleton in S. cerevisiae; mutants are viable	1.29941	0.03061
orf19.6163_393	ORF19.6163	CSE4	Centromeric histone H3 variant; role in structural changes of centromeric nucleosomes during cell cycle; 4 nucleosomes bind 1 centromere, each has 1 Cse4 molecule during most of cell cycle, 2 molecules in anaphase; Spider biofilm repressed	1.29934	0.06211
orf19.537_690	ORF19.537		Ortholog of C. dubliniensis CD36 : Cd36_29810, C. parapsilosis CDC317 : CPAR2_206030, Candida tenuis NRRL Y-1498 : CANTEDRAFT_102086 and Debaryomyces hansenii CBS767 : DEHA2F14014g	1.29885	0.05799
orf19.5265_2656	ORF19.5265	KIP4	S. cerevisiae Smy1 ortholog; Tn mutation affects filamentous growth; filament induced; has Mob2-dependent hyphal regulation; regulated by Nrg1, Tup1; oralpharyngeal candidasis induced; Spider biofilm induced; flow model biofilm repressed	1.2988	0.02662
orf19.4018_453	ORF19.4018		Ortholog(s) have structural constituent of ribosome activity and mitochondrial small ribosomal subunit localization	1.2987	0.00565
orf19.3969_1828	ORF19.3969	SFL2	Transcription factor involved in regulation of morphogenesis; required for filamentous growth, for virulence in RHE model but not in mice; induced upon RHE infection but C. dubliniensis ortholog is not; Spider biofilm induced	1.29802	0.10964
orf19.6249_1717	ORF19.6249	HAK1	Putative potassium transporter; similar to Schwanniomyces occidentalis Hak1p; amphotericin B induced; induced upon phagocytosis by macrophage; Hap43-repressed; rat catheter biofilm repressed	1.29752	0.17311
orf19.7114_2876	ORF19.7114	CSA1	Surface antigen on elongating hyphae and buds; strain variation in repeat number; ciclopirox, filament induced, alkaline induced by Rim101; Efg1-, Cph1, Hap43-regulated; required for WT RPMI biofilm formation; Bcr1-induced in a/a biofilms	1.29748	0.10181
orf19.7288_1037	ORF19.7288		Protein with predicted oxidoreductase and dehydrogenase domains; Hap43-repressed; Spider biofilm induced	1.29716	0.07831
orf19.3008_857	ORF19.3008	COQ4	Protein with a putative role in coenzyme Q biosynthesis; transcriptionally induced by interaction with macrophage; Hap43p-repressed gene	1.29681	0.08804
orf19.689_1615	ORF19.689	PLB1	Phospholipase B; host cell penetration and virulence in mouse systemic infection; Hog1-induced; signal sequence, N-glycosylation, and Tyr phosphorylation site; induced in fluconazole-resistant strains; rat catheter biofilm repressed	1.29663	0.0871
orf19.5558_856	ORF19.5558	RBF1	Transcription factor; glutamine-rich activation domain; binds RPG-box DNA sequences; predominantly nuclear; mutation causes accelerated induction of filamentous growth; antigenic during human oral infection; Sko1p-repressed	1.29564	0.01283
orf19.4739_1319	ORF19.4739	MSS116	Putative DEAD-box protein; required for efficient splicing of mitochondrial Group I and II introns; Hap43-induced; rat catheter biofilm induced	1.29537	0.04142
orf19.5275_1025	ORF19.5275		Ortholog(s) have ATPase activator activity, role in late endosome to vacuole transport via multivesicular body sorting pathway, positive regulation of protein oligomerization and endosome membrane, multivesicular body localization	1.29534	0.0204
orf19.5369_691	ORF19.5369		Uroporphyrinogen decarboxylase; catalyzes the 5th step in the heme biosynthetic pathway; flow model and Spider biofilm repressed	1.29531	0.00978
orf19.2252_1327	ORF19.2252		Protein of unknown function; rat catheter biofilm repressed	1.29482	0.00085
orf19.71_912	ORF19.71		Ortholog(s) have role in ER to Golgi vesicle-mediated transport, protein secretion and COPII vesicle coat, Golgi membrane, cell division site, cell tip, cis-Golgi network, cytosol, nucleus localization	1.29462	0.0213
orf19.4492_760	ORF19.4492		Ortholog(s) have role in nuclear division, rRNA processing and mitotic spindle pole body, nuclear periphery, nucleolus, preribosome, large subunit precursor localization	1.29432	0.08008
orf19.5255_1945	ORF19.5255	PXA2	Putative peroxisomal, half-size adrenoleukodystrophy protein (ALD or ALDp) subfamily ABC transporter; Gcn4p-regulated	1.29411	0.00737
orf19.6828_714	ORF19.6828		Ortholog(s) have role in rRNA processing and nucleolus, preribosome, large subunit precursor localization	1.29383	0.02715
orf19.2699_1589	ORF19.2699	ABP1	Ortholog of S. cerevisiae Abp1; actin-binding protein of the cortical actin cytoskeleton; caspofungin induced; protein only detected in stationary phase yeast-form cultures; Spider biofilm repressed	1.29361	0.07654
orf19.4991_2527	ORF19.4991	MPT5	Putative RNA-binding protein; Hap43p-repressed gene; protein induced during the mating process	1.29353	0.04162
orf19.4600_555	ORF19.4600		Protein of unknown function; possible mitochondrial protein; Spider biofilm induced	1.29311	0.12577
orf19.1985_1044	ORF19.1985		Has aminoglycoside phosphotransferase and protein kinase domains; rat catheter and flow model biofilm induced	1.29309	0.17059
orf19.6827_702	ORF19.6827	SLU7	Protein similar to S. cerevisiae RNA splicing factor, Slu7; induced by alpha pheromone in SpiderM medium	1.29283	0.00767
orf19.425_410	ORF19.425		Has domain(s) with predicted translation release factor activity and role in translational termination	1.29266	0.04541
orf19.7345_361	ORF19.7345		Ortholog(s) have ATP binding activity and cytosol, nucleus localization	1.29262	0.02146
orf19.856_1531	ORF19.856	IFK2	Putative thiol-specific monooxygenase; mutant is viable; flow model biofilm induced	1.29258	0.00593
orf19.7371_3250	ORF19.7371	ZCF35	Zn(II)2Cys6 transcription factor; Hap43-induced; Spider biofilm induced	1.29232	0.04065
orf19.7458_158	ORF19.7458		Ortholog of C. dubliniensis CD36 : Cd36_86660, Candida tenuis NRRL Y-1498 : cten_CGOB_00028, Candida tropicalis MYA-3404 : CTRG_05695 and Candida albicans WO-1 : CAWG_02979	1.29211	0.01318
orf19.2146_1017	ORF19.2146	HAT2	Putative Hat1-Hat2 histone acetyltransferase complex subunit; role in DNA damage repair and morphogenesis; mutations cause constitutive pseudohyphal growth, caspofungin sensitivity; rat catheter and Spider biofilm repressed	1.29202	0.20615
orf19.1690_1339	ORF19.1690	TOS1	Protein similar to alpha agglutinin anchor subunit; secreted; exogenously expressed protein is a substrate for Kex2 processing in vitro; fluconazole-induced; induced by alpha pheromone in SpiderM medium; Hap43-induced	1.29197	0.00741
orf19.4187_1142	ORF19.4187		Ortholog(s) have role in hyphal growth, mitochondrial genome maintenance, phospholipid transport, protein import into mitochondrial outer membrane, sporocarp development involved in sexual reproduction	1.29185	0.05713
orf19.6580_465	ORF19.6580		Protein of unknown function; Spider biofilm induced	1.29169	0.00315
orf19.5312_757	ORF19.5312	MET4	Putative transcription coactivator; predicted role in sulfur amino acid metabolism; required for yeast cell adherence to silicone substrate; Spider biofilm induced	1.29146	0.11217
orf19.6400_505	ORF19.6400		Ortholog(s) have role in inositol metabolic process and cytosol, nuclear envelope localization	1.29144	0.03184
orf19.7106_2245	ORF19.7106	VPS70	Ortholog(s) have role in protein targeting to vacuole and endoplasmic reticulum localization	1.29098	0.29004
orf19.2026_1946	ORF19.2026	UBP13	Ortholog of S. cerevisiae Ubp13; putative ubiquitin carboxyl-terminal hydrolase; flow model biofilm induced; rat catheter biofilm repressed	1.29084	0.03963
orf19.5340_1579	ORF19.5340		Putative Rab GTPase activator; role in ER to Golgi vesicle-mediated transport; Spider biofilm induced	1.29075	0.07862
orf19.2282_851	ORF19.2282		Has domain(s) with predicted catechol 1,2-dioxygenase activity, ferric iron binding activity and role in catechol-containing compound metabolic process, oxidation-reduction process	1.29067	0.00451
orf19.7068_852	ORF19.7068	MAC1	Copper fist transcription factor; regulator of CTR1 copper transporter; induces CTR1 in low-copper conditions; ectopic expression causes copper-sensitive stimulation of filamentation in S. cerevisiae; Spider biofilm induced	1.29064	0.02278
orf19.2054_1391	ORF19.2054	FGR15	Putative transcription factor with zinc finger DNA-binding motif; lacks an ortholog in S. cerevisiae; transposon mutation affects filamentous growth; caspofungin induced; mutation causes marginal increase in caspofungin sensitivity	1.29054	0.05564
orf19.357_447	ORF19.357		Ortholog(s) have role in inner mitochondrial membrane organization, mitochondrion inheritance, mitochondrion morphogenesis, negative regulation of proteolysis, protein folding, replicative cell aging	1.28992	0.04977
orf19.3312_1659	ORF19.3312		Protein of unknown function; flow model and Spider biofilm repressed	1.28969	0.0193
orf19.6479_2135	ORF19.6479	SEC1	Ortholog(s) have SNARE binding activity and role in positive regulation of vesicle fusion, vesicle docking involved in exocytosis	1.28875	0.04268
orf19.7667_602	ORF19.7667	IAH1	Protein similar to S. cerevisiae Iah1p, which is involved in acetate metabolism; mutation confers hypersensitivity to tunicamycin; transposon mutation affects filamentous growth	1.28857	0.0159
orf19.122_1819	ORF19.122	CDC20	Activator of anaphase-promoting complex/cyclosome; induced under Cdc5 depletion; member of conserved Mcm1 regulon; mRNA expression peaks at cell-cycle G2/M phase; mRNA binds She3 and is localized to buds of yeast cells and to hyphal tips	1.28829	0.04601
orf19.6238_1144	ORF19.6238		Ortholog(s) have mitochondrion localization	1.28826	0.09601
orf19.484_958	ORF19.484	MRPL40	Putative mitochondrial ribosomal protein; Spider biofilm repressed	1.28822	0.02199
orf19.3022_858	ORF19.3022		Ortholog(s) have structural constituent of ribosome activity and mitochondrial small ribosomal subunit localization	1.28785	0.06377
orf19.6534.2_1322	ORF19.6534.2	CRN1	Coronin; cortical actin cytoskeletal component; predicted role in regulation of actin patch assembly; rat catheter and Spider biofilm repressed	1.2876	0.00037
orf19.1177_982	ORF19.1177		Ortholog of S. cerevisiae Rtt106; histone chaperone that regulates chromatin structure in transcribed and silenced chromosomal regions; affects transcriptional elongation; Hap43-repressed; Spider biofilm repressed	1.28746	0.01148
orf19.2528_1756	ORF19.2528		Putative RNA polymerase III transcription factor (TFIIIB) subunit; flucytosine repressed	1.2873	0.05161
orf19.6465_1269	ORF19.6465		Ortholog of C. dubliniensis CD36 : Cd36_83910, Candida tropicalis MYA-3404 : CTRG_05087 and Candida albicans WO-1 : CAWG_00654	1.28717	0.13398
orf19.5610_857	ORF19.5610	ARG3	Putative ornithine carbamoyltransferase; Gcn4-regulated; Hap43-induced; repressed in alkalinizing medium; rat catheter and Spider biofilm induced	1.28682	0.13581
orf19.4184_1723	ORF19.4184		Protein with a predicted role in clathrin cage assembly; Hap43-repressed; Spider biofilm repressed	1.28668	0.0135
orf19.354_1408	ORF19.354		Ortholog(s) have aminopeptidase activity, role in protein processing, protein stabilization and extrinsic to mitochondrial inner membrane, nucleus localization	1.28658	0.05758
orf19.4778_1938	ORF19.4778	LYS142	Zn(II)2Cys6 transcription factor; has similarity to S. cerevisiae Lys14, involved in the regulation of lysine biosynthesis genes; fungal-specific	1.2864	0.07797
orf19.71_796	ORF19.71		Ortholog(s) have role in ER to Golgi vesicle-mediated transport, protein secretion and COPII vesicle coat, Golgi membrane, cell division site, cell tip, cis-Golgi network, cytosol, nucleus localization	1.28626	0.04968
orf19.5126_597	ORF19.5126		Putative adhesin-like protein	1.28625	0.02083
orf19.548_124	ORF19.548	CDC10	Septin, required for wild-type cell, hyphal, or chlamydospore morphology; role in virulence and kidney tissue invasion in mouse infection; forms ring at sites of cell division and filaments in mature chlamydospore; Spider biofilm repressed	1.28615	0.12174
orf19.3233_1069	ORF19.3233	HSE1	ESCRT-0 complex subunit; SH3-domain-containing protein	1.28607	0.05882
orf19.7306_801	ORF19.7306		Aldo-keto reductase; increased transcript associated with MDR1 overexpression, benomyl or long-term fluconazole treatment; overexpression does not affect drug or oxidative stress sensitivity; stationary phase enriched; flow biofim repressed	1.28602	0.13368
orf19.3029_1450	ORF19.3029		Predicted 3-hydroxyisobutyryl-CoA hydrolase; mitochondrially localized; Spider biofilm induced	1.28586	0.06923
orf19.2282_782	ORF19.2282		Has domain(s) with predicted catechol 1,2-dioxygenase activity, ferric iron binding activity and role in catechol-containing compound metabolic process, oxidation-reduction process	1.28584	0.05403
orf19.497_854	ORF19.497	EAF7	Subunit of the NuA4 histone acetyltransferase complex	1.28555	0.01891
orf19.6518_1915	ORF19.6518		Predicted aldehyde dehydrogenase [NAD(P)+]; Spider biofilm induced	1.28547	0.01288
orf19.190_677	ORF19.190		Ortholog(s) have role in endoplasmic reticulum organization, histone exchange and Swr1 complex, mitochondrion localization	1.28526	0.03041
orf19.537_568	ORF19.537		Ortholog of C. dubliniensis CD36 : Cd36_29810, C. parapsilosis CDC317 : CPAR2_206030, Candida tenuis NRRL Y-1498 : CANTEDRAFT_102086 and Debaryomyces hansenii CBS767 : DEHA2F14014g	1.28512	0.03401
orf19.4568_2283	ORF19.4568	ZCF25	Putative Zn(II)2Cys6 transcription factor	1.28502	0.03053
orf19.6598_1937	ORF19.6598	WAL1	Protein required for hyphal growth and for wild-type cell morphology, polarized budding, endocytosis, vacuole morphology; similar to Wiskott-Aldrich syndrome protein; localizes to cortical actin patches and hyphal tips	1.28465	0.03163
orf19.4591_1796	ORF19.4591	CAT2	Major carnitine acetyl transferase; intracellular acetyl-CoA transport; localized in peroxisomes and mitochondria; induced in macrophages; Hog1-repressed; stationary phase enriched; farnesol-upregulated in biofilm; Spider biofilm induced	1.28462	0.04981
orf19.5444_1076	ORF19.5444	TIM44	Protein involved in transport across membranes; Spider biofilm repressed	1.28436	0.03668
orf19.3505_2251	ORF19.3505		Ortholog(s) have role in TOR signaling cascade, actin filament bundle assembly, eisosome assembly, endosomal transport, establishment or maintenance of actin cytoskeleton polarity, regulation of cell growth	1.28435	0.03191
orf19.6175_435	ORF19.6175		Putative 35S rRNA processing protein; Hap43-induced; repressed by prostaglandins; Spider biofilm induced	1.2841	0.00643
orf19.1466_541	ORF19.1466	REX2	Putative 3'-5' RNA exonuclease with a predicted role in 3'-end processing of U4 and U5 snRNAs, 5S and 5.8S rRNAs; rat catheter biofilm induced	1.28391	0.01383
orf19.6759_1885	ORF19.6759			1.28358	0.00326
orf19.5527_1285	ORF19.5527		Protein with a predicted role in 5.8S rRNA processing; flow model biofilm induced	1.28251	0.03821
orf19.4570_382	ORF19.4570		Ortholog of C. dubliniensis CD36 : Cd36_42090, Debaryomyces hansenii CBS767 : DEHA2C14872g, Pichia stipitis Pignal : PICST_74821 and Spathaspora passalidarum NRRL Y-27907 : SPAPADRAFT_58607	1.28234	0.0237
orf19.4600_649	ORF19.4600		Protein of unknown function; possible mitochondrial protein; Spider biofilm induced	1.28215	0.03951
orf19.1704_1004	ORF19.1704	FOX3	Putative peroxisomal 3-oxoacyl CoA thiolase; transcript regulated by white-opaque switch; Spider biofilm induced	1.28208	0.06208
orf19.5404_1435	ORF19.5404			1.2818	0.00992
orf19.544_360	ORF19.544	RPR2	Ortholog(s) have ribonuclease P activity, role in intronic box C/D snoRNA processing and cytosol, nucleolar ribonuclease P complex localization	1.2815	0.0659
orf19.7149_1567	ORF19.7149		Putative GTPase inhibitor; predicted role in endocytosis, protein targeting to vacuole; rat catheter biofilm repressed	1.28121	0.02312
orf19.5459_1208	ORF19.5459		mRNA polyadenylation regulating protein; Hap43-repressed; transcript is upregulated in RHE model of oral candidiasis and in clinical isolates from HIV+ patients with oral candidiasis; Spider biofilm repressed	1.2811	0.01729
orf19.802_542	ORF19.802	UGA1	Putative GABA transaminase; transcription regulated by Mig1 and Tup1; stationary phase enriched protein; rat catheter and Spider biofilm induced	1.28102	0.2246
orf19.4560_1087	ORF19.4560	BFR1	Protein involved in the maintenance of normal ploidy; S. cerevisiae ortholog cofers Brefeldin A resistance; stationary phase enriched protein; Spider biofilm repressed	1.28085	0.09742
orf19.1462_2287	ORF19.1462	SMP2	Putative Mg2+-dependent phosphatidate phosphatase; transcript regulated by Nrg1	1.28045	0.05352
orf19.5296_553	ORF19.5296		Ortholog(s) have role in mitochondrial respiratory chain complex IV assembly and integral to mitochondrial inner membrane localization	1.28044	0.08552
orf19.2808_3158	ORF19.2808	ZCF16	Predicted Zn(II)2Cys6 transcription factor; mutants are viable; rat catheter biofilm induced	1.2795	0.04882
orf19.2723_4	ORF19.2723	HIT1	Ortholog of S. cerevisiae Hit1; protein of unknown function required for high temperature growth; flow model biofilm induced; Spider biofilm induced	1.27921	0.0191
orf19.1896_1888	ORF19.1896	SSC1	Heat shock protein; at yeast-form cell surface, not hyphae; antigenic; Gcn4-regulated; induced by amino acid starvation (3-AT) or by adherence to polystyrene; macrophage-repressed; sumoylation target; possibly essential	1.27919	0.03891
orf19.4622_541	ORF19.4622		Ortholog(s) have role in telomere maintenance, transcription-coupled nucleotide-excision repair, ubiquitin-dependent protein catabolic process and nucleus localization	1.27846	0.13731
orf19.541_876	ORF19.541		Has domain(s) with predicted oxidoreductase activity, acting on paired donors, with incorporation or reduction of molecular oxygen, 2-oxoglutarate as one donor, and incorporation of one atom each of oxygen into both donors activity	1.27839	0.00148
orf19.5417_572	ORF19.5417	DOT5	Putative nuclear thiol peroxidase; alkaline downregulated; sumoylation target; Spider and flow model biofilm induced	1.27823	0.04107
orf19.4383_672	ORF19.4383		Ortholog(s) have DNA 5'-adenosine monophosphate hydrolase activity, mismatched DNA binding, zinc ion binding activity, role in cellular response to DNA damage stimulus and cytosol, nucleus localization	1.27805	0.02076
orf19.3579_505	ORF19.3579	ATP4	Putative F0-ATP synthase subunit 4; macrophage/pseudohyphal-induced; present in exponential and stationary growth phases	1.27799	0.0158
orf19.1466_610	ORF19.1466	REX2	Putative 3'-5' RNA exonuclease with a predicted role in 3'-end processing of U4 and U5 snRNAs, 5S and 5.8S rRNAs; rat catheter biofilm induced	1.27751	0.00901
orf19.3066_3353	ORF19.3066	ENG1	Endo-1,3-beta-glucanase; ortholog of S. cerevisiae Dse4 needed for cell separation; caspofungin, fluconazole repressed; repressed by alpha pheromone in SpiderM medium; flow model biofilm induced; rat catheter biofilm repressed	1.27748	0.21582
orf19.1444_1375	ORF19.1444		Ortholog(s) have phosphatidylinositol-4,5-bisphosphate binding activity, role in actin cortical patch assembly, actin filament organization, endocytosis and actin cortical patch, mating projection tip localization	1.27744	0.09057
orf19.7141_614	ORF19.7141	UFE1	Protein interacting with Sec20p, possibly involved in retrograde transport between the Golgi and the endoplasmic reticulum; functional homolog of S. cerevisiae Ufe1p, which is an ER t-SNARE that mediates the retrograde traffic	1.27694	0.00231
orf19.1750_149	ORF19.1750	SLR1	Protein similar to mammalian SR-like RNA splicing factor; involved in filamentous growth and virulence; gene has intron; Spider biofilm repressed	1.27693	0.13012
orf19.4016_1225	ORF19.4016		Putative ubiquinol-cytochrome-c reductase; amphotericin B induced; repressed by nitric oxide; protein level decreases in stationary phase cultures; Hap43-repressed; Spider biofilm repressed	1.27659	0.05426
orf19.2684_2137	ORF19.2684		Protein of unknown function; flow model biofilm repressed	1.27657	0.01688
orf19.3901_1431	ORF19.3901		Putative benzene desulfurase; induced by nitric oxide independent of Yhb1p	1.27616	0.00696
orf19.51_3981	ORF19.51		Ortholog(s) have role in mitochondrion organization, translational initiation and eukaryotic translation initiation factor 3 complex localization	1.27604	0.02496
orf19.5635_143	ORF19.5635	PGA7	GPI-linked hyphal surface antigen; induced by ciclopirox olamine, ketoconazole, Rim101 at pH 8; Hap43, fluconazole; flow model biofilm induced; Spider biofilm induced; required for RPMI biofilm; Bcr1-induced in a/a biofilm	1.27596	0.13795
orf19.1885_977	ORF19.1885	TAF4	Putative TFIID subunit; mutation confers hypersensitivity to toxic ergosterol analog	1.27591	0.06109
orf19.1444_1248	ORF19.1444		Ortholog(s) have phosphatidylinositol-4,5-bisphosphate binding activity, role in actin cortical patch assembly, actin filament organization, endocytosis and actin cortical patch, mating projection tip localization	1.27577	0.20063
orf19.7239_1799	ORF19.7239	MDG1	Ortholog(s) have role in pheromone-dependent signal transduction involved in conjugation with cellular fusion and cytoplasm, membrane raft, nucleus, plasma membrane localization	1.27577	0.01254
orf19.3752_844	ORF19.3752	RAD51	Protein involved in homologous recombination and DNA repair; flucytosine induced; slow growth and increased white-to-opaque switching frequency in null mutant	1.27577	0.03628
orf19.7629_2984	ORF19.7629		Ortholog(s) have Seh1-associated complex, cytosol, extrinsic to fungal-type vacuolar membrane, ribosome localization	1.27576	0.06787
orf19.4121_998	ORF19.4121		Predicted thioesterase/thiol ester dehydrase-isomerase; Spider biofilm induced	1.27572	0.0555
orf19.5425_2484	ORF19.5425		Ortholog(s) have 3'-tRNA processing endoribonuclease activity, role in tRNA 3'-trailer cleavage, endonucleolytic and mitochondrion, nucleus localization	1.2756	0.01437
orf19.7295_1373	ORF19.7295		Ortholog(s) have protein phosphatase 1 binding activity, role in actin filament organization, cortical actin cytoskeleton organization, endocytosis, protein secretion and actin cortical patch, nucleus localization	1.27559	0.20087
orf19.1430_2418	ORF19.1430		Ortholog of C. parapsilosis CDC317 : CPAR2_402120, C. dubliniensis CD36 : Cd36_43870, Lodderomyces elongisporus NRLL YB-4239 : LELG_04437 and Candida orthopsilosis Co 90-125 : CORT_0E02170	1.27525	0.07319
orf19.2602_2173	ORF19.2602	OPT1	Oligopeptide transporter; transports 3-to-5-residue peptides; alleles are distinct, one has intron; suppresses S. cerevisiae ptr2-2 mutant defects; induced by BSA or peptides; Stp3p, Hog1p regulated; flow model biofilm induced	1.27491	0.09146
orf19.4093_1583	ORF19.4093	PES1	Pescadillo homolog required for yeast cell growth, lateral yeast growth on filamentous cells and virulence in mice; hyphal cells grow normally in mutant; mutation confers hypersensitivity to 5-fluorocytosine, 5-fluorouracil, tubercidin	1.27478	0.03868
orf19.5325_1193	ORF19.5325	KIN3	Protein similar to S. cerevisiae Kin3p; induced under Cdc5p depletion; shows Mob2p-dependent hyphal regulation; mutants are hypersensitive to caspofungin	1.27467	0.01672
orf19.3773_1963	ORF19.3773	CDL1	Putative RNAse III, ortholog of S. cerevisiae RNT1; merged with orf19.3772 in Assembly 21	1.27458	0.06611
orf19.494_1417	ORF19.494		Putative RNA-binding protein; role in assembly of box H/ACA snoRNPs and thus pre-rRNA processing; Spider biofilm induced	1.27451	0.01903
orf19.2137_1355	ORF19.2137		Ortholog(s) have mitochondrion localization	1.27406	0.00208
orf19.5424_467	ORF19.5424		Ortholog of Candida albicans WO-1 : CAWG_02376	1.27404	0.01686
orf19.3013_1135	ORF19.3013	CDC12	Septin; essential for viability; forms ring at sites of cell division and also forms filaments in mature chlamydospore; filamentous growth induced; regulated by Nrg1, Tup1, tyrosol and cell density; rat catheter biofilm repressed	1.27402	0.20912
orf19.7492_1786	ORF19.7492	SWC4	Subunit of the NuA4 histone acetyltransferase complex	1.2738	0.02352
orf19.7288_1177	ORF19.7288		Protein with predicted oxidoreductase and dehydrogenase domains; Hap43-repressed; Spider biofilm induced	1.27378	0.15573
orf19.92_2628	ORF19.92		Protein with a predicted thioredoxin-like domain; Hap43-repressed; induced by prostaglandins	1.27376	0.05166
orf19.2237.1_331	ORF19.2237.1		Ortholog of Slx9 required for pre-rRNA processing; associated with 90S pre-ribosome and 43S small ribosomal subunit precursor, interacts with U3 snoRNA in S. cerevisiae; gene has intron; Spider biofilm induced	1.27361	0.02429
orf19.6694_1710	ORF19.6694		Ortholog of C. dubliniensis CD36 : Cd36_73320, C. parapsilosis CDC317 : CPAR2_703860, Candida tenuis NRRL Y-1498 : CANTEDRAFT_114480 and Debaryomyces hansenii CBS767 : DEHA2C13794g	1.27358	0.22215
orf19.5698_120	ORF19.5698		Putative mitochondrial ribosomal protein of the large subunit; transcript is upregulated in clinical isolates from HIV+ patients with oral candidiasis; Spider biofilm repressed	1.27325	0.02409
orf19.400_575	ORF19.400	GCF1	HMG box mitochondrial protein; binds to mt DNA and the HWP1 promoter; mutant phenotype and functional complementation of an S. cerevisiae abf2 mutation suggest role in mt genome replication, maintenance; flow and Spider biofilm repressed	1.273	0.00297
orf19.6494_1643	ORF19.6494	WHI3	Putative RNA binding protein; induced during infection of murine kidney, compared to growth in vitro; has murine homolog	1.27284	0.27324
orf19.6517_945	ORF19.6517	RAD14	Putative DNA repair protein; transcription is regulated upon yeast-hyphal switch; flucytosine repressed	1.27282	0.05393
orf19.7374_2742	ORF19.7374	CTA4	Zn(II)2Cys6 transcription factor; induced by nitric oxide; induced by Mnl1 under weak acid stress; repressed upon adherence to polystyrene; Hap43-repressed; Spider biofilm induced	1.27261	0.01885
orf19.2051_2814	ORF19.2051		Ortholog of C. dubliniensis CD36 : Cd36_15670, C. parapsilosis CDC317 : CPAR2_213100, Candida tenuis NRRL Y-1498 : CANTEDRAFT_135034 and Debaryomyces hansenii CBS767 : DEHA2E14960g	1.27258	0.08391
orf19.3232_1438	ORF19.3232		Putative transporter; mutation confers hypersensitivity to toxic ergosterol analog; fungal-specific (no human or murine homolog)	1.27238	0.13827
orf19.6903_670	ORF19.6903		Predicted RNA polymerase III subunit C37; Spider biofilm induced	1.27232	0.04373
orf19.6341_356	ORF19.6341		Ortholog(s) have 5-amino-6-(5-phosphoribosylamino)uracil reductase activity, role in riboflavin biosynthetic process and cytosol, nucleus localization	1.27164	0.0308
orf19.1416_712	ORF19.1416	COX11	Cytochrome oxidase assembly protein; transcript regulated by Nrg1; protein repressed during the mating process; Hap43-repressed gene; rat catheter biofilm induced	1.27157	0.00108
orf19.1574_1552	ORF19.1574		Putative TFIID subunit involved in RNA polymerase II transcription initiation; possibly an essential gene, disruptants not obtained by UAU1 method	1.27114	0.04048
orf19.876_682	ORF19.876	PGA33	Putative GPI-anchored protein of unknown function; Spider biofilm repressed	1.27108	0.02195
orf19.1228_292	ORF19.1228	HAP2	CCAAT-binding transcription factor; regulates low-iron induction of FRP1; in these conditions CBF comprises Hap43 and probably Hap2 and Hap3; possibly essential, disruptants not obtained by UAU1 method; Cap1-dependent induction in low iron	1.27098	0.07152
orf19.6008.3_143	ORF19.6008.3		Ortholog of C. dubliniensis CD36 : Cd36_00920, Debaryomyces hansenii CBS767 : DEHA2F20724g, Pichia stipitis Pignal : PICST_32745 and Candida albicans WO-1 : CAWG_01277	1.27072	0.03196
orf19.6759_1731	ORF19.6759			1.27048	0.05016
orf19.5504_2000	ORF19.5504		Ortholog of C. dubliniensis CD36 : Cd36_73400, C. parapsilosis CDC317 : CPAR2_703180, Candida tenuis NRRL Y-1498 : CANTEDRAFT_104803 and Debaryomyces hansenii CBS767 : DEHA2A04466g	1.27026	0.03965
orf19.4828_1366	ORF19.4828		WD repeat domain protein; Hap43-repressed gene; flow model biofilm induced	1.27019	0.09326
orf19.6742_1977	ORF19.6742		Ortholog(s) have CTD phosphatase activity	1.2698	0.00462
orf19.1822_2048	ORF19.1822	UME6	Zn(II)2Cys6 transcription factor; role in hyphal extension, virulence, adherence to plastic; filament induced; regulated by Nrg1/Tup1/Rfg1, alkaline conditions; expression promotes highly filamentous biofilms; rat catheter biofilm induced	1.26976	0.03253
orf19.5691_1150	ORF19.5691	CDC11	Septin; cell and hyphal morphology, agar-invasive growth, full virulence and kidney tissue invasion in mouse, but not kidney colonization, immunogenicity; hyphal and cell-cycle-regulated phosphorylation; rat catheter biofilm repressed	1.26967	0.05322
orf19.764_2338	ORF19.764		Ortholog(s) have clathrin-coated vesicle, cytoplasm localization	1.2696	0.00492
orf19.2520_425	ORF19.2520		Ortholog(s) have structural constituent of ribosome activity and mitochondrial small ribosomal subunit localization	1.26947	0.06532
orf19.4284_1245	ORF19.4284	BUR2	Protein with similarity to S. cerevisiae Bur2p, contains a cyclin domain; not required for wild-type hyphal growth, adherence to buccal epithelial cells, or virulence in mouse systemic infection	1.2691	0.00936
orf19.5205_1318	ORF19.5205		Protein of unknown function; Hap43-repressed gene	1.26863	0.02913
orf19.6501_627	ORF19.6501		Ortholog of C. dubliniensis CD36 : Cd36_71960, Pichia stipitis Pignal : psti_CGOB_00136, Spathaspora passalidarum NRRL Y-27907 : SPAPADRAFT_63786 and Candida tropicalis MYA-3404 : CTRG_05049	1.26857	0.0411
orf19.6225.1_235	ORF19.6225.1		Ortholog(s) have role in mitochondrial respiratory chain complex IV assembly and mitochondrion localization	1.26855	0.04415
orf19.5307_1275	ORF19.5307	JEN2	Dicarboxylic acid transporter; regulated by glucose repression; induced by Rgt1; disruptants not obtained by UAU1 method; rat catheter and Spider biofilm induced	1.26838	0.34058
orf19.6049_1896	ORF19.6049		Ortholog(s) have protein kinase activator activity, role in protein phosphorylation, regulation of cytokinesis and chromosome passenger complex, kinetochore microtubule, spindle midzone localization	1.26832	0.00964
orf19.7458_8	ORF19.7458		Ortholog of C. dubliniensis CD36 : Cd36_86660, Candida tenuis NRRL Y-1498 : cten_CGOB_00028, Candida tropicalis MYA-3404 : CTRG_05695 and Candida albicans WO-1 : CAWG_02979	1.2683	0.06852
orf19.2812_1453	ORF19.2812		Protein of unknown function; Spider biofilm induced	1.26815	0.01917
orf19.272_2019	ORF19.272	FAA21	Predicted acyl CoA synthetase; upregulated upon phagocytosis; transcript regulated by Nrg1 and Mig1	1.26814	0.17443
orf19.3310_606	ORF19.3310		Protein of unknown function; Hap43-repressed; rat catheter and Spider biofilm induced	1.26778	0.06018
orf19.6758_741	ORF19.6758		Predcted glucose 1-dehydrogenase (NADP+); rat catheter biofilm repressed	1.26715	0.03274
orf19.5213_2066	ORF19.5213		Putative protein of unknown function; transcript is upregulated in clinical isolates from HIV+ patients with oral candidiasis	1.26702	0.10695
orf19.6713_892	ORF19.6713		Has domain(s) with predicted nucleic acid binding activity	1.26702	0.00935
orf19.6322_661	ORF19.6322	ARD	D-arabitol dehydrogenase, NAD-dependent (ArDH); enzyme of D-arabitol and D-arabinose catabolism; D-arabitol is a marker for active infection in humans; rat catheter and Spider biofilm induced	1.26678	0.01869
orf19.2846_322	ORF19.2846		Protein of unknown function; Hap43-repressed; induced in core caspofungin response; regulated by yeast-hypha switch; Spider biofilm repressed	1.26677	0.08085
orf19.7165_361	ORF19.7165	MED9	RNA polymerase II mediator complex subunit; Hap43p-repressed gene	1.26673	0.0378
orf19.4258_922	ORF19.4258		Puttaive pre-mRNA polyadenylation factor; heterozygous null mutant exhibits hypersensitivity to parnafungin and cordycepin in the C. albicans fitness test	1.26672	0.02022
orf19.7158_1565	ORF19.7158		Protein of allantoate permease family; fungal-specific (no human or murine homolog); Hap43p-repressed gene	1.26661	0.09565
orf19.6208_2221	ORF19.6208	MEF2	Putative mitochondrial translation elongation factor; caspofungin induced	1.26661	0.01168
orf19.4208_998	ORF19.4208	RAD52	Required for homologous DNA recombination, repair of UV- or MMS-damaged DNA, telomere length, UV-induced LOH; constitutive expression, MMS-induced; weakly complements S. cerevisiae rad52 mutant; slow growth, increased white-to-opaque switch	1.26654	0.05628
orf19.4346_6217	ORF19.4346		Ortholog(s) have protein anchor activity, role in COPII vesicle coating, protein localization to endoplasmic reticulum exit site and ER to Golgi transport vesicle membrane, endoplasmic reticulum exit site localization	1.26651	0.00597
orf19.1716_664	ORF19.1716	URA3	Orotidine-5'-phosphate decarboxylase; pyrimidine biosynthesis; gene used as genetic marker; decreased expression when integrated at ectopic chromosomal locations can cause defects in hyphal growth and virulence; Spider biofilm repressed	1.26648	0.10669
orf19.1474_3595	ORF19.1474	SLA1	Protein required for assembly of the cortical actin cytoskeleton; contains three SH3 domains; transcription is regulated by Nrg1 and Mig1; flow model biofilm repressed	1.26642	0.027
orf19.2472.1_51	ORF19.2472.1		Ortholog of C. dubliniensis CD36 : Cd36_61610, C. parapsilosis CDC317 : CPAR2_107530, Candida tenuis NRRL Y-1498 : CANTEDRAFT_115252 and Debaryomyces hansenii CBS767 : DEHA2D02200g	1.26612	0.06906
orf19.6170_794	ORF19.6170		Ortholog(s) have microtubule binding, protein heterodimerization activity, protein homodimerization activity	1.26568	0.03643
orf19.5274_3007	ORF19.5274		Ortholog(s) have cellular bud neck, cellular bud tip, cytoplasm localization	1.26539	0.05759
orf19.5980_1655	ORF19.5980		Protein of unknown function; Hap43-repressed gene	1.26534	0.0558
orf19.809_1214	ORF19.809		Ortholog(s) have role in maturation of LSU-rRNA from tricistronic rRNA transcript (SSU-rRNA, 5.8S rRNA, LSU-rRNA) and nucleolus, preribosome localization	1.26528	0.00241
orf19.6112_503	ORF19.6112	CTA2	Putative transcription factor; Med2 mediator domain; activates transcription in 1-hybrid assay in S. cerevisiae; repressed by Efg1; member of a family of telomere-proximal genes; Tbf1-induced	1.26526	0.00578
orf19.2715_1212	ORF19.2715	RPC53	Ortholog(s) have RNA polymerase III activity, role in tRNA transcription from RNA polymerase III promoter and DNA-directed RNA polymerase III complex localization	1.26499	0.00211
orf19.2525_631	ORF19.2525	LYS12	Homoisocitrate dehydrogenase; catalyzes 4th step in the alpha-aminoadipate pathway of lysine biosynthesis; clade-associated gene expression; protein level decreases in stationary phase cultures; Spider biofilm repressed	1.26462	0.04449
orf19.5013_1417	ORF19.5013	AGM1	Phosphoacetylglucosamine mutase (N-acetylglucosamine-phosphate mutase); enzyme of UDP-N-acetylglucosamine (UDP-GlcNAc) biosynthesis	1.26448	0.0298
orf19.359_691	ORF19.359	GTT12	Ortholog(s) have glutathione peroxidase activity, glutathione transferase activity, role in glutathione metabolic process and endoplasmic reticulum, mitochondrial outer membrane, plasma membrane localization	1.26418	0.01832
orf19.4941_648	ORF19.4941	TYE7	bHLH transcription factor; control of glycolysis; required for biofilm formation; hyphally regulated by Cph1, Cyr1; flucytosine, Hog1 induced; amphotericin B, caspofungin repressed; induced in flow model biofilm and planktonic cultures	1.26316	0.02456
orf19.3577_697	ORF19.3577	COQ5	Putative methyltransferase of ubiquinone biosynthesis; regulated by Gcn4; repressed by amino acid starvation (3-AT), Hap43; induced upon adherence to polystyrene; Spider biofilm repressed	1.2627	0.07777
orf19.6052_995	ORF19.6052	CNS1	Putative co-chaperone; Hap43p-induced gene; mutation confers hypersensitivity to radicicol	1.2621	0.07873
orf19.5661_920	ORF19.5661	PTC7	Protein phosphatase, type 2C; has S/T phosphatase activity, Mn2+/Mg2+ dependent; predicted membrane-spanning segment and mitochondrion-targeting signal	1.26205	0.04584
orf19.3537_290	ORF19.3537		Putative sulfiredoxin; regulated by Tsa1, Tsa1B in minimal media at 37 degrees C; flow model biofilm induced; Spider biofilm induced	1.2619	0.06949
orf19.6414.3_325	ORF19.6414.3	TPM2	Putative tropomyosin isoform 2; regulated by Gcn4; repressed by amino acid starvation; macrophage-induced; protein levels decrease in stationary cells; Hap43-induced; rat catheter and Spider biofilm repressed	1.26184	0.0521
orf19.5014_595	ORF19.5014		Ortholog(s) have mitochondrion localization	1.26149	0.03078
orf19.34_1319	ORF19.34	GIT1	Glycerophosphoinositol permease; involved in utilization of glycerophosphoinositol as a phosphate source; Rim101-repressed; virulence-group-correlated expression	1.26132	0.00514
orf19.1519_3160	ORF19.1519		Protein of unknown function; Hap43-repressed gene	1.2613	0.00172
orf19.2393_1333	ORF19.2393		Putative transcription factor with zinc finger DNA-binding motif	1.26087	0.01657
orf19.2274_501	ORF19.2274		Ortholog of C. dubliniensis CD36 : Cd36_21450, Candida tropicalis MYA-3404 : CTRG_01739 and Candida albicans WO-1 : CAWG_05814	1.26072	0.15347
orf19.7365_1311	ORF19.7365		Ortholog(s) have ubiquitin-protein ligase activity and role in negative regulation of apoptotic process, negative regulation of gluconeogenesis, proteasome-mediated ubiquitin-dependent protein catabolic process	1.26046	0.21899
orf19.6398_1070	ORF19.6398		S. pombe ortholog SPBC460.04c is a predicted sulfonate/alpha-ketoglutare dioxygenase; induced by nitric oxide; Spider biofilm induced	1.26032	0.02651
orf19.7001_1360	ORF19.7001	YCK2	Plasma membrane protein similar to S. cerevisiae casein kinase I, Yck2p; null mutant has defect in damaging oral epithelial cells and in hyphal branching; transcription is activated in weak acid stress or on contact with host cells	1.26008	0.15737
orf19.3116_376	ORF19.3116	EXM2	Putative U1 snRNP complex compotent; decreased transcription is observed upon fluphenazine treatment	1.25988	0.03706
orf19.1600_1738	ORF19.1600		Ortholog of C. dubliniensis CD36 : Cd36_23530, C. parapsilosis CDC317 : CPAR2_406140, Candida tenuis NRRL Y-1498 : CANTEDRAFT_116829 and Debaryomyces hansenii CBS767 : DEHA2B01826g	1.25964	0.03742
orf19.3591_1503	ORF19.3591	APE3	Putative vacuolar aminopeptidase Y,; regulated by Gcn2 and Gcn4; rat catheter and Spider biofilm repressed	1.25954	0.08271
orf19.6853_979	ORF19.6853		Protein of unknown function; Spider biofilm repressed	1.25912	0.00357
orf19.4186_1196	ORF19.4186	PCT1	Putative choline-phosphate cytidylyl transferase, antigenic during human oral infection	1.25911	0.00905
orf19.6008_2471	ORF19.6008		S. cerevisiae ortholog YLL032C interacts with ribosomes; repressed by alpha pheromone in SpiderM medium	1.25909	0.00465
orf19.4646_379	ORF19.4646	UEC1	Protein required for damage to oral epithelial cells and for normal hyphal growth and stress resistance; transcription induced on contact with vascular endothelial cells; not highly conserved	1.25874	0.16748
orf19.1862_206	ORF19.1862		Possible stress protein; increased transcription associated with CDR1 and CDR2 overexpression or fluphenazine treatment; regulated by Sfu1, Nrg1, Tup1; stationary phase enriched protein; Spider biofilm induced	1.25862	0.00579
orf19.4459_1531	ORF19.4459		Predicted heme-binding stress-related protein; Tn mutation affects filamentous growth; induced during chlamydospore formation in C. albicans and C. dubliniensis; Spider biofilm induced	1.25841	0.19558
orf19.599_263	ORF19.599		Dubious open reading frame	1.25826	0.08758
orf19.7261_500	ORF19.7261	GDI1	Putative Rab GDP-dissociation inhibitor; GlcNAc-induced protein; Spider biofilm repressed	1.25793	0.00957
orf19.92_1777	ORF19.92		Protein with a predicted thioredoxin-like domain; Hap43-repressed; induced by prostaglandins	1.25759	0.01978
orf19.1856_832	ORF19.1856		Ortholog(s) have histone deacetylase activity	1.25699	0.08362
orf19.593_2263	ORF19.593	FGR32	Protein similar to S. cerevisiae Swa2p; induced upon adherence to polystyrene; transposon mutation affects filamentous growth; Hap43p-repressed gene	1.25674	0.03777
orf19.2114_853	ORF19.2114		Predicted uricase; ortholog of S. pombe SPCC1223.09; Spider biofilm induced	1.25645	0.02935
orf19.1288_2603	ORF19.1288	FOX2	3-hydroxyacyl-CoA epimerase; fatty acid beta-oxidation; induced by phagocytosis; regulated by Mig1, by white-opaque switch, by DNA methylation; transcriptional activation by oleate requires Ctf1; rat catheter and Spider biofilm induced	1.25639	0.03385
orf19.7250_283	ORF19.7250		Protein of unknown function; rat catheter and Spider biofilm induced	1.25632	0.09887
orf19.1793_1636	ORF19.1793		Ortholog(s) have phosphatidylinositol binding activity, role in cellular response to nitrogen starvation, piecemeal microautophagy of nucleus and Golgi apparatus, endosome, extrinsic to membrane, fungal-type vacuole localization	1.25617	0.05002
orf19.5323_970	ORF19.5323	MDH1-3	Predicted malate dehydrogenase; farnesol regulated; protein present in exponential and stationary growth phase yeast; Hap43p-repressed gene	1.25617	0.02795
orf19.5420_1045	ORF19.5420		Ortholog(s) have role in fatty acid metabolic process	1.25612	0.005
orf19.5275_1094	ORF19.5275		Ortholog(s) have ATPase activator activity, role in late endosome to vacuole transport via multivesicular body sorting pathway, positive regulation of protein oligomerization and endosome membrane, multivesicular body localization	1.25605	0.04688
orf19.5205_1387	ORF19.5205		Protein of unknown function; Hap43-repressed gene	1.25599	0.01953
orf19.886_3731	ORF19.886	PAN1	Essential protein involved in endocytosis and polarized growth; ortholog of S. cerevisiae Pan1, which is a part of a complex that regulates actin cytoskeleton; Spider biofilm repressed	1.25598	0.04887
orf19.539_1458	ORF19.539	LAP3	Putative aminopeptidase; positively regulated by Sfu1; clade-associated gene expression; virulence-group-correlated expression; induced by alpha pheromone in SpiderM medium; Hap43-induced; Spider and flow model biofilm induced	1.2554	0.06126
orf19.6031_1966	ORF19.6031	VPS27	Putative ESCRT-0 complex protein with a role in multivesicular body (MVB) trafficking	1.25504	0.0991
orf19.6191_324	ORF19.6191	TLO8	Member of a family of telomere-proximal genes of unknown function; may be spliced in vivo	1.25501	0.03483
orf19.2971_1698	ORF19.2971		Ortholog of C. dubliniensis CD36 : Cd36_02630, C. parapsilosis CDC317 : CPAR2_108390, Candida tenuis NRRL Y-1498 : CANTEDRAFT_115724 and Debaryomyces hansenii CBS767 : DEHA2D07986g	1.25471	0.01781
orf19.5077_411	ORF19.5077		Protein of unknown function; Hap43-repressed gene; repressed by nitric oxide	1.25466	0.0193
orf19.7376_2105	ORF19.7376		Ortholog of C. dubliniensis CD36 : Cd36_85880, C. parapsilosis CDC317 : CPAR2_806870, Candida tenuis NRRL Y-1498 : CANTEDRAFT_96983 and Debaryomyces hansenii CBS767 : DEHA2D16148g	1.25461	0.03145
orf19.2919_2115	ORF19.2919	MPH1	Protein similar to S. cerevisiae Mph1p, which is a DNA helicase involved in DNA repair; induced under hydroxyurea treatment	1.25406	0.00618
orf19.6219_1255	ORF19.6219		Ortholog of C. dubliniensis CD36 : Cd36_06470, C. parapsilosis CDC317 : CPAR2_208960, Candida tenuis NRRL Y-1498 : CANTEDRAFT_114040 and Pichia stipitis Pignal : PICST_51125	1.25393	0.03924
orf19.6512_1527	ORF19.6512	EXO70	Predicted subunit of the exocyst complex, involved in exocytosis; localizes to a crescent on the surface of the hyphal tip	1.25377	0.01025
orf19.5118_1828	ORF19.5118	SDS24	Protein similar to S. cerevisiae Sds24 involved in cell separation during budding; transcript regulated by Mig1 and Tup1; fluconazole-induced; flow model biofilm induced	1.25374	0.14206
orf19.3843_640	ORF19.3843		Ortholog(s) have role in filamentous growth, posttranslational protein targeting to membrane, translocation and Sec62/Sec63 complex localization	1.25361	0.01066
orf19.6326_50	ORF19.6326		Ortholog of C. dubliniensis CD36 : Cd36_60130, C. parapsilosis CDC317 : CPAR2_603380, Candida tenuis NRRL Y-1498 : CANTEDRAFT_94402 and Debaryomyces hansenii CBS767 : DEHA2G06556g	1.25358	0.00647
orf19.6838_13	ORF19.6838		Putative protein of unknown function, transcript upregulated in clinical isolates from HIV+ patients with oral candidiasis; Spider biofilm induced	1.25352	0.03995
orf19.6741_1069	ORF19.6741		Putative plasma membrane protein; predicted role in cell wall integrity; regulated by Nrg1, Tup1; induced during chlamydospore formation in both C. albicans and C. dubliniensis	1.25338	0.01387
orf19.7369_1183	ORF19.7369	TRM12	Ortholog(s) have S-adenosylmethionine-dependent methyltransferase activity, transferase activity, transferring alkyl or aryl (other than methyl) groups activity and role in tRNA methylation, wybutosine biosynthetic process	1.25324	0.03804
orf19.6250_860	ORF19.6250		Ortholog(s) have eukaryotic initiation factor 4G binding, mRNA binding activity	1.25321	0.03208
orf19.6498_799	ORF19.6498		Ortholog(s) have role in RNA polymerase II complex localization to nucleus, RNA polymerase III complex localization to nucleus and DNA-directed RNA polymerase II, holoenzyme, cytoplasm localization	1.25302	0.02077
orf19.3603_2198	ORF19.3603	MFG1	Regulator of filamentous growth; required for biofilm formation, virulence; interacts with Flo8 and Mss11	1.25281	0.04414
orf19.6236_62	ORF19.6236	NOP6	Putative ortholog of S. cerevisiae Nop6; role in ribosomal small subunit biogenesis; Spider biofilm induced	1.25259	0.05741
orf19.267_2514	ORF19.267		Protein required for normal filamentous growth; mRNA binds She3	1.25249	0.04011
orf19.4987_311	ORF19.4987	NUP49	Nuclear pore protein	1.2524	0.03454
orf19.7513_1027	ORF19.7513	ALK2	N-Alkane inducible cytochrome P450	1.25224	0.03223
orf19.6136_769	ORF19.6136		Ortholog of S. cerevisiae Mrpl4, a mitochondrial ribosomal protein of the large subunit; repressed by nitric oxide	1.25217	0.03022
orf19.3714_1198	ORF19.3714		Ortholog of C. dubliniensis CD36 : Cd36_33530, C. parapsilosis CDC317 : CPAR2_201980, Candida tenuis NRRL Y-1498 : CANTEDRAFT_134293 and Debaryomyces hansenii CBS767 : DEHA2A10164g	1.25212	0.03276
orf19.1825_2167	ORF19.1825		Protein of unknown function; mutants are viable; filament induced; regulated by Nrg1, Rfg1, Tup1	1.25203	0.03647
orf19.3734_2239	ORF19.3734	GEF2	Member of the voltage chloride channel family; Hap43p-repressed gene	1.25197	0.47562
orf19.4396_1568	ORF19.4396		Mitochondrial inner membrane protein; mammalian mitofilin domain; Spider biofilm repressed	1.25193	0.00473
orf19.7006_3042	ORF19.7006		Ortholog(s) have role in reciprocal meiotic recombination	1.25143	0.03495
orf19.2215_541	ORF19.2215	GLE1	Putative nucleoporin; moderately induced at 42 degrees C	1.25118	0.00434
orf19.674_1027	ORF19.674		Ortholog(s) have U6 snRNA binding, pre-mRNA binding activity and role in mRNA cis splicing, via spliceosome, spliceosomal snRNP assembly	1.25073	0.01056
orf19.6757_753	ORF19.6757	GCY1	Aldo/keto reductase; mutation confers hypersensitivity to toxic ergosterol analog; farnesol-repressed; stationary phase enriched protein; flow model biofilm induced; Spider biofilm repressed	1.25059	0.04424
orf19.850_957	ORF19.850		Ortholog(s) have protein-N-terminal asparagine amidohydrolase activity, protein-N-terminal glutamine amidohydrolase activity and role in cellular protein modification process, protein catabolic process	1.25051	0.04016
orf19.5030_735	ORF19.5030	DOS2	Protein of unknown function; induced during planktonic growth	1.25027	0.03755
orf19.5436_2032	ORF19.5436	UTP8	Essential nucleolar protein; involved in tRNA export from the nucleus and ribosomal small subunit biogenesis; physically interacts with TAP-tagged Nop1; Spider biofilm induced	1.24999	0.10603
orf19.3401_530	ORF19.3401	CTA1	Protein similar to S. cerevisiae Mos10p, which affects S. cerevisiae filamentous growth; activates transcription in 1-hybrid assay in S. cerevisiae; protein levels increase under weak acid stress; nonessential	1.24997	0.0112
orf19.1412_523	ORF19.1412		Ortholog of C. dubliniensis CD36 : Cd36_44020, C. parapsilosis CDC317 : CPAR2_302330, Candida tenuis NRRL Y-1498 : CANTEDRAFT_105448 and Debaryomyces hansenii CBS767 : DEHA2C10582g	1.24992	0.024
orf19.4114_2095	ORF19.4114	FAA2-1	Predicted long chain fatty acid CoA ligase; upregulated upon phagocytosis; induced by nitric oxide independent of Yhb1	1.24982	0.0797
orf19.872_513	ORF19.872		Ortholog of C. dubliniensis CD36 : Cd36_18230, Debaryomyces hansenii CBS767 : DEHA2E20636g, Pichia stipitis Pignal : PICST_66811 and Spathaspora passalidarum NRRL Y-27907 : SPAPADRAFT_60843	1.2498	0.12033
orf19.4897_897	ORF19.4897	SFH5	Putative phosphatidylinositol transporter; rat catheter and Spider biofilm repressed	1.24971	0.00703
orf19.610_893	ORF19.610	EFG1	bHLH transcription factor; required for white-phase cell type, RPMI and Spider biofilm formation, hyphal growth, cell-wall gene regulation; roles in adhesion, virulence; Cph1 and Efg1 have role in host cytokine response; binds E-box	1.24968	0.06314
orf19.3846_1977	ORF19.3846	LYS4	Homoaconitase; regulated by Gcn4, Gcn2; induced in response to amino acid starvation (3-AT); induced by human whole blood or PMNs; Hap43-repressed; flow model and Spider biofilm repressed	1.24967	0.00961
orf19.6756_835	ORF19.6756		Ortholog(s) have Rab GTPase binding activity and Golgi apparatus, endoplasmic reticulum localization	1.24958	0.00906
orf19.5785_661	ORF19.5785		Protein of unknown function; upregulated in a cyr1 or ras1 null mutant; induced by nitric oxide	1.24956	0.12717
orf19.6326_325	ORF19.6326		Ortholog of C. dubliniensis CD36 : Cd36_60130, C. parapsilosis CDC317 : CPAR2_603380, Candida tenuis NRRL Y-1498 : CANTEDRAFT_94402 and Debaryomyces hansenii CBS767 : DEHA2G06556g	1.24955	0.08853
orf19.2190_1671	ORF19.2190	VRP1	Verprolin-related protein involved in actin cytoskeleton organization and polarized morphogenesis; interacts with Wal1p and Myo5p; downregulated upon adherence to polystyrene	1.24953	0.06722
orf19.1374_447	ORF19.1374		Ortholog of C. dubliniensis CD36 : Cd36_23840, Candida tenuis NRRL Y-1498 : CANTEDRAFT_104074, Debaryomyces hansenii CBS767 : DEHA2B13310g and Pichia stipitis Pignal : PICST_58235	1.24946	0.04021
orf19.6183_36	ORF19.6183	TIM8	Predicted mitochondrial intermembrane space protein with role in protein import into mitochondrial inner membrane and cytosol	1.24945	0.06084
orf19.1201_1406	ORF19.1201		Ortholog(s) have serine-tRNA ligase activity, role in invasive growth in response to glucose limitation, mitochondrial seryl-tRNA aminoacylation, pseudohyphal growth, spore germination and mitochondrion localization	1.24859	0.08018
orf19.360_1594	ORF19.360	FUR4	Putative uracil permease	1.24856	0.04046
orf19.878_816	ORF19.878	NBN1	Subunit of the NuA4 histone acetyltransferase complex; Plc1p-regulated	1.24854	0.0329
orf19.6882_1371	ORF19.6882	OSM1	Putative flavoprotein subunit of fumarate reductase; soluble protein in hyphae; caspofungin repressed; stationary phase enriched protein; flow model biofilm induced; Spider biofilm repressed	1.24842	0.07249
orf19.4317_200	ORF19.4317	GRE3	Putative D-xylose reductase; antigenic in murine systemic infection; soluble protein in hyphae; induced by farnesol, macrophage interaction and by Mnl1 under weak acid stress; stationary-phase enriched protein; Spider biofilm induced	1.24814	0.09802
orf19.5444_1189	ORF19.5444	TIM44	Protein involved in transport across membranes; Spider biofilm repressed	1.24804	0.05746
orf19.3475_312	ORF19.3475		Described as a Gag-related protein; hyphal induced; downregulation correlates with clinical development of fluconazole resistance; repressed by nitric oxide, 17-beta-estradiol, ethynyl estradiol	1.24776	0.08564
orf19.962_136	ORF19.962		Protein with a fungal RNA polymerase I subunit RPA14 domain; proposed to play a role in the recruitment of pol I to the promoter; Hap43-induced gene	1.24767	0.27352
orf19.7552_1745	ORF19.7552		Putative U3-containing small subunit processome complex protein; Hap43-induced gene; repressed in core stress response; Spider biofilm induced	1.24734	0.00989
orf19.3083_1144	ORF19.3083		Putative lipid phosphatase of the endoplasmic reticulum; role in DNA repair, actin cytoskeleton organization, cellular manganese ion homeostasis; Spider biofilm repressed	1.24726	0.03195
orf19.7193_1580	ORF19.7193		Specificity factor required for ubiquitination; role in protein targeting to vacuole; involved in ubiquitin-dependent protein catabolism via the multivesicular body sorting pathway; Spider biofilm induced	1.24712	0.14343
orf19.7158_1353	ORF19.7158		Protein of allantoate permease family; fungal-specific (no human or murine homolog); Hap43p-repressed gene	1.2471	0.01115
orf19.2828_744	ORF19.2828		Ortholog(s) have alpha-tubulin binding, microtubule binding activity, role in establishment or maintenance of cell polarity, post-chaperonin tubulin folding pathway and cytosol, nucleus localization	1.24688	0.06634
orf19.6046_4315	ORF19.6046	APC1	Putative Anaphase-Promoting Complex/Cyclosome subunit; essential for growth; periodic mRNA expression, peak at cell-cycle S/G2 phase	1.24685	0.03506
orf19.7239_1906	ORF19.7239	MDG1	Ortholog(s) have role in pheromone-dependent signal transduction involved in conjugation with cellular fusion and cytoplasm, membrane raft, nucleus, plasma membrane localization	1.24669	0.1037
orf19.742_1556	ORF19.742	ALD6	Putative aldehyde dehydrogenase; stationary phase enriched protein; expression regulated upon white-opaque switch; rat catheter biofilm induced; rat catheter and Spider biofilm induced	1.2464	0.0865
orf19.3751_2718	ORF19.3751		Putative serine/threonine protein kinase; possibly an essential gene, disruptants not obtained by UAU1 method	1.24618	0.14617
orf19.467_1654	ORF19.467	WOR3	Transcription factor; modulator of white-opaque switch; induced in opaque cells; promoter bound by Wor1; overexpression at 25 degr shifts cells to opaque state; deletion stabilizes opaque cells at higher temperatures; Spider biofilm induced	1.24616	0.08237
orf19.2178.1_62	ORF19.2178.1		Protein of unknown function; Spider biofilm induced	1.246	0.09697
orf19.2379_946	ORF19.2379	NOT4	Putative E3 ubiquitin-protein ligase; required for maintenance, but not induction, of hyphal development; homozygous null mutant is avirulent in mouse systemic infection despite persistence in host; repressed in rat oral candidiasis	1.24592	0.0024
orf19.1890_1408	ORF19.1890		Ortholog(s) have role in medium-chain fatty acid biosynthetic process	1.24584	0.00902
orf19.5976_1235	ORF19.5976		Protein of unknown function; ortholog of S. cerevisiae Urn1; downregulated by fluphenazine treatment, in azole-resistant strains that overexpress CDR1 and CDR2 or MDR1	1.24562	0.10153
orf19.6163_577	ORF19.6163	CSE4	Centromeric histone H3 variant; role in structural changes of centromeric nucleosomes during cell cycle; 4 nucleosomes bind 1 centromere, each has 1 Cse4 molecule during most of cell cycle, 2 molecules in anaphase; Spider biofilm repressed	1.24522	0.05456
orf19.7060_907	ORF19.7060		Ortholog of C. dubliniensis CD36 : Cd36_70070, C. parapsilosis CDC317 : CPAR2_301080, Debaryomyces hansenii CBS767 : DEHA2F22946g and Pichia stipitis Pignal : PICST_46820	1.24442	0.14923
orf19.392_349	ORF19.392		Ortholog(s) have role in mitochondrial respiratory chain complex III assembly and integral to mitochondrial membrane localization	1.2443	0.01565
orf19.3743_957	ORF19.3743		Ortholog of C. dubliniensis CD36 : Cd36_27230, C. parapsilosis CDC317 : CPAR2_801320, Candida tenuis NRRL Y-1498 : CANTEDRAFT_113198 and Debaryomyces hansenii CBS767 : DEHA2E23782g	1.24425	0.1105
orf19.5433_174	ORF19.5433		Ortholog(s) have protein binding involved in protein folding activity, role in mitochondrial respiratory chain complex III assembly and mitochondrial matrix localization	1.24416	0.07578
orf19.2795_916	ORF19.2795	LHP1	Ortholog(s) have tRNA binding activity, role in regulation of ascospore formation, tRNA 3'-trailer cleavage, endonucleolytic and nucleolus, nucleoplasm localization	1.24399	0.02473
orf19.2662_531	ORF19.2662		Predicted ORF of unknown function; overlaps TLO34/orf19.2661	1.24389	0.026
orf19.6313.2_128	ORF19.6313.2	MVB12	ESCRT-I complex subunit with a role in multivesicular body (MVB) trafficking; mutant displays growth defect on alkaline medium; Hap43p-repressed gene	1.24387	0.16887
orf19.6084_447	ORF19.6084		Protein of unknown function; flow model biofilm induced; Spider biofilm induced	1.24354	0.12689
orf19.2797_1054	ORF19.2797		Has domain(s) with predicted ATP binding, DNA binding, helicase activity	1.2433	0.08168
orf19.6724_1432	ORF19.6724	FUM12	Putative fumarate hydratase; enzyme of citric acid cycle; fluconazole, Efg1 repressed; induced in high iron; protein present in exponential and stationary growth phase	1.2432	0.0154
orf19.2866_1368	ORF19.2866		Has domain(s) with predicted DNA binding activity	1.24304	0.0161
orf19.2167_1198	ORF19.2167		Ortholog(s) have role in ribosomal large subunit biogenesis, ribosomal small subunit biogenesis and cytosolic large ribosomal subunit, nucleolus localization	1.24301	0.09123
orf19.4401_770	ORF19.4401	YVH1	Putative dual specificity phosphatase (phosphoserine/threonine and phosphotyrosine phosphatase); required for wild-type growth rate and for wild-type virulence in mouse model of systemic infection; Hap43p-induced gene	1.24281	0.0388
orf19.2657_2007	ORF19.2657		Protein of unknown function	1.24276	0.099
orf19.2154_1402	ORF19.2154	HXK1	N-acetylglucosamine (GlcNAc) kinase; involved in GlcNAc utilization; required for wild-type hyphal growth and mouse virulence; GlcNAc-induced transcript; induced by alpha pheromone in SpiderM medium	1.24269	0.04216
orf19.6886_1150	ORF19.6886		Ortholog(s) have rRNA binding activity, role in maturation of LSU-rRNA from tricistronic rRNA transcript (SSU-rRNA, 5.8S rRNA, LSU-rRNA), ribosomal large subunit export from nucleus and nucleolus localization	1.24256	0.06769
orf19.2114_680	ORF19.2114		Predicted uricase; ortholog of S. pombe SPCC1223.09; Spider biofilm induced	1.2425	0.05935
orf19.4471_2081	ORF19.4471		Ortholog(s) have role in protein targeting to vacuole, re-entry into mitotic cell cycle after pheromone arrest and endoplasmic reticulum membrane localization	1.24245	0.05896
orf19.6059_288	ORF19.6059	TTR1	Putative glutaredoxin; described as a glutathione reductase; induced by human neutrophils and benomyl treatment; alkaline repressed; regulated by Gcn2 and Gcn4; required for virulence in mouse model; Spider biofilm induced	1.24223	0.07542
orf19.1426_1995	ORF19.1426		Ortholog of S. cerevisiae Skg6; localizes to the cell cortex, cell bud neck, cell bud tip, incipient cellular bud site, and is membrane-bound; Spider biofilm induced	1.24221	0.01448
orf19.6889_1282	ORF19.6889	MKK2	Ortholog of S. cerevisiae Mkk2; MAP kinase kinase involved in signal transduction; macrophage-downregulated; mutants are viable and hypersensitive to caspofungin	1.24217	0.08079
orf19.2984_1042	ORF19.2984	MST1	Ortholog(s) have role in mitochondrial threonyl-tRNA aminoacylation and mitochondrion localization	1.24196	0.12442
orf19.6052_1094	ORF19.6052	CNS1	Putative co-chaperone; Hap43p-induced gene; mutation confers hypersensitivity to radicicol	1.24172	0.18234
orf19.422_1987	ORF19.422	SPT20	Putative transcription factor; downregulated upon adherence to polystyrene; flucytosine repressed	1.2417	0.07056
orf19.2249_502	ORF19.2249		Putative metalloprotease of the mitochondrial inner membrane; expression downregulated in an ssr1 null mutant	1.24148	0.01891
orf19.397_260	ORF19.397		Ortholog(s) have structural constituent of ribosome activity and cytosol, mitochondrial large ribosomal subunit, nucleus localization	1.24143	0.06106
orf19.3679_463	ORF19.3679		Putative protein of unknown function; stationary phase enriched protein	1.2413	0.16792
orf19.7675_392	ORF19.7675		Mitochondrial ribosomal protein of the large subunit; Spider biofilm repressed	1.2412	0.03444
orf19.6507_948	ORF19.6507		Putative curved DNA-binding protein orthologous to S. pombe Cdb4; stationary phase enriched protein; rat catheter and Spider biofilm repressed	1.241	0.04488
orf19.7428_1021	ORF19.7428	APN1	Ortholog of S. cerevisiae Apn1; an AP endonuclease; transcript induced by interaction with macrophages; fungal-specific (no human or murine homolog)	1.24094	0.02887
orf19.4342_619	ORF19.4342	SUT1	Zn2Cys6 transcription factor involved in sterol uptake; flow model biofilm induced; Spider biofilm repressed	1.24092	0.01582
orf19.4591_1727	ORF19.4591	CAT2	Major carnitine acetyl transferase; intracellular acetyl-CoA transport; localized in peroxisomes and mitochondria; induced in macrophages; Hog1-repressed; stationary phase enriched; farnesol-upregulated in biofilm; Spider biofilm induced	1.24067	0.0306
orf19.2070_1242	ORF19.2070		Ortholog(s) have role in G1/S transition of mitotic cell cycle, chromatin remodeling, nucleosome disassembly, transcription elongation from RNA polymerase II promoter and RSC complex localization	1.24058	0.10475
orf19.1750_717	ORF19.1750	SLR1	Protein similar to mammalian SR-like RNA splicing factor; involved in filamentous growth and virulence; gene has intron; Spider biofilm repressed	1.24056	0.13093
orf19.7650_1092	ORF19.7650	LTV1	Putative GSE complex component; repressed by prostaglandins	1.2405	0.02483
orf19.1966_735	ORF19.1966	BUD23	Putative methyltransferase; Hap43-induced; repressed by prostaglandins	1.24038	0.04937
orf19.2465_1061	ORF19.2465	POL32	Putative subunit of DNA polymerase delta, involved in chromosomal DNA replication; cell-cycle regulated periodic mRNA expression	1.24026	0.00771
orf19.5325_996	ORF19.5325	KIN3	Protein similar to S. cerevisiae Kin3p; induced under Cdc5p depletion; shows Mob2p-dependent hyphal regulation; mutants are hypersensitive to caspofungin	1.2402	0.00976
orf19.7422_703	ORF19.7422		Ortholog(s) have RNA binding activity and nucleus localization	1.24019	0.0281
orf19.7578_673	ORF19.7578		Ortholog(s) have oligosaccharide binding activity, role in ER-associated ubiquitin-dependent protein catabolic process and Hrd1p ubiquitin ligase ERAD-L complex, luminal surveillance complex localization	1.23974	0.15941
orf19.2506_1387	ORF19.2506		Protein of unknown function; opaque-specific transcript; induced during chlamydospore formation in both C. albicans and C. dubliniensis; Hog1-repressed; Spider biofilm induced	1.23963	0.12463
orf19.3407_566	ORF19.3407	RAD18	Putative transcription factor with zinc finger DNA-binding motif; Hap43p-repressed gene	1.23921	0.01276
CaalfMp08_1342	CaalfMp08	COX1	Subunit I of cytochrome c oxidase, which is the terminal member of the mitochondrial (mt) inner membrane electron transport chain; one of three mt-encoded subunits; alternatively spliced transcripts encode 4 putative splicing endonucleases	1.23911	0.22303
orf19.1057_482	ORF19.1057		Ortholog of C. dubliniensis CD36 : Cd36_03980, C. parapsilosis CDC317 : CPAR2_107050, Candida tenuis NRRL Y-1498 : CANTEDRAFT_113999 and Debaryomyces hansenii CBS767 : DEHA2D12518g	1.23894	0.04649
orf19.3591_641	ORF19.3591	APE3	Putative vacuolar aminopeptidase Y,; regulated by Gcn2 and Gcn4; rat catheter and Spider biofilm repressed	1.23893	0.03945
orf19.3376_422	ORF19.3376		Ortholog of Candida albicans WO-1 : CAWG_03459	1.23879	0.22576
orf19.6414_1643	ORF19.6414		Ortholog of C. dubliniensis CD36 : Cd36_34040, C. parapsilosis CDC317 : CPAR2_205850, Candida tenuis NRRL Y-1498 : CANTEDRAFT_132607 and Debaryomyces hansenii CBS767 : DEHA2A11638g	1.23831	0.10048
orf19.4919_1243	ORF19.4919		Has domain(s) with predicted DNA binding, nucleic acid binding activity	1.23831	0.03283
orf19.3074_397	ORF19.3074	TLO10	Member of a family of telomere-proximal genes of unknown function	1.23819	0.01365
orf19.1290_1651	ORF19.1290	XKS1	Putative xylulokinase; Hap43-repressed; induced by prostaglandins; rat catheter biofilm repressed	1.23803	0.01202
orf19.4535_2147	ORF19.4535	PTR3	Protein similar to S. cerevisiae Ptr3p, which is a sensor of external amino acids; expression upregulated in an ssr1 null mutant	1.23796	0.03365
orf19.6156_426	ORF19.6156		Ortholog of S. cerevisiae : AIM11, C. glabrata CBS138 : CAGL0I04928g, C. dubliniensis CD36 : Cd36_80770, C. parapsilosis CDC317 : CPAR2_102260 and Candida tenuis NRRL Y-1498 : CANTEDRAFT_114262	1.23781	0.04962
orf19.6250_736	ORF19.6250		Ortholog(s) have eukaryotic initiation factor 4G binding, mRNA binding activity	1.23775	0.22788
orf19.2989_964	ORF19.2989	GOR1	Ortholog(s) have glyoxylate reductase activity, role in glyoxylate catabolic process and cytosol, extracellular region, mitochondrion, nucleus localization	1.23755	0.05763
orf19.2506_1311	ORF19.2506		Protein of unknown function; opaque-specific transcript; induced during chlamydospore formation in both C. albicans and C. dubliniensis; Hog1-repressed; Spider biofilm induced	1.23734	0.04891
orf19.5340_1497	ORF19.5340		Putative Rab GTPase activator; role in ER to Golgi vesicle-mediated transport; Spider biofilm induced	1.23731	0.01443
orf19.229_870	ORF19.229		Ortholog(s) have ubiquitin-protein ligase activity, role in protein ubiquitination involved in ubiquitin-dependent protein catabolic process and chromosome, centromeric region, mitotic spindle pole body, nucleus localization	1.237	0.00334
orf19.761_1796	ORF19.761	TCO89	Putative homolog of S. cerevisiae Tco89p, which is a component of the TOR C1 complex that is involved in the regulation of growth and cell wall integrity; heterozygous null mutant displays sensitivity to rapamycin	1.23688	0.1245
orf19.4287_734	ORF19.4287		Putative oxidoreductase; Hap43-repressed gene; clade-associated gene expression	1.23687	0.10955
orf19.3901_1362	ORF19.3901		Putative benzene desulfurase; induced by nitric oxide independent of Yhb1p	1.23678	0.1518
orf19.897_25	ORF19.897	VPS20	ESCRT III complex protein; role in multivesicular body (MVB) trafficking; required for processing of Rim8; Bcr1-repressed in RPMI a/a biofilms	1.23668	0.07986
orf19.886_3481	ORF19.886	PAN1	Essential protein involved in endocytosis and polarized growth; ortholog of S. cerevisiae Pan1, which is a part of a complex that regulates actin cytoskeleton; Spider biofilm repressed	1.23643	0.09407
orf19.3077_1885	ORF19.3077	VID21	Subunit of the NuA4 histone acetyltransferase complex; soluble protein in hyphae; Spider biofilm repressed	1.23614	0.03801
orf19.3995_2095	ORF19.3995	RIM13	Protease of the pH response pathway; likely to mediate activation of Rim101 via C-terminal cleavage; required for alkaline pH-induced hyphal growth and for normal chlamydospore formation; Hap43-repressed; flow model biofilm induced	1.23604	0.01246
orf19.6712_1848	ORF19.6712		Ortholog(s) have COPI-coated vesicle, Golgi apparatus localization	1.2359	0.00769
orf19.5277_1036	ORF19.5277		Ortholog(s) have role in nuclear-transcribed mRNA catabolic process, 3'-5' exonucleolytic nonsense-mediated decay, protein ubiquitination and cytoplasm, nucleolus, polysome localization	1.23569	0.0312
orf19.3639_975	ORF19.3639		Ortholog(s) have alkylbase DNA N-glycosylase activity and role in DNA dealkylation involved in DNA repair, base-excision repair, AP site formation	1.23555	0.09137
orf19.1933_1665	ORF19.1933		Ortholog(s) have role in peroxisome organization and peroxisomal membrane localization	1.23552	0.08085
orf19.6758_640	ORF19.6758		Predcted glucose 1-dehydrogenase (NADP+); rat catheter biofilm repressed	1.23537	0.0145
orf19.5528_660	ORF19.5528	MOB1	Putative mitotic exit network component; periodic mRNA expression, peak at cell-cycle G2/M phase	1.23523	0.05625
orf19.2862_699	ORF19.2862	RIB1	Putative GTP cyclohydrolase II; enzyme of riboflavin biosynthesis; fungal-specific (no human or murine homolog); regulated by Sef1p-, Sfu1p-, and Hap43p	1.2351	0.01666
orf19.5501_350	ORF19.5501	YAF9	Subunit of the NuA4 histone acetyltransferase complex; transcript regulated by Mig1; possibly an essential gene, disruptants not obtained by UAU1 method	1.23506	0.00428
orf19.5278_970	ORF19.5278		Protein of unknown function; Spider biofilm induced	1.235	0.04375
orf19.661_757	ORF19.661	KRR1	Putative nucleolar protein; repressed benomyl treatment or in an azole-resistant strain that overexpresses MDR1; F-12/CO2 early biofilm induced	1.23495	0.24404
orf19.804_922	ORF19.804		Putative mitochondrial carrier family transporter; rat catheter biofilm induced	1.23489	0.20539
orf19.5518_520	ORF19.5518		Protein of unknown function; Spider biofilm induced	1.23471	0.02653
orf19.7242_2432	ORF19.7242	NCR1	Putative vacuolar membrane protein; predicted role in sphingolipid metabolism; transcript regulated by Nrg1 and Mig1; induced by prostaglandins	1.23456	0.2103
orf19.4874_1641	ORF19.4874	MNN23	Alpha-1,2-mannosyltransferase; mutants hypersensitive to toxic ergosterol analog, amphotericin B, calcofluor white, growth at 42 degrees and have decreased cell wall mannan; flow model biofilm induced	1.23441	0.03165
orf19.2525_735	ORF19.2525	LYS12	Homoisocitrate dehydrogenase; catalyzes 4th step in the alpha-aminoadipate pathway of lysine biosynthesis; clade-associated gene expression; protein level decreases in stationary phase cultures; Spider biofilm repressed	1.2341	0.01963
orf19.3664_526	ORF19.3664	HSP31	Putative 30 kda heat shock protein; repressed during the mating process; rat catheter biofilm induced	1.23407	0.27978
orf19.4538_747	ORF19.4538		Ortholog(s) have mRNA binding, protein heterodimerization activity, role in mRNA cleavage, mRNA polyadenylation and U2 snRNP, mRNA cleavage factor complex localization	1.23406	0.07601
orf19.3289_864	ORF19.3289		Phosphorylated protein of unknown function	1.23395	0.00629
orf19.206_3080	ORF19.206		Putative adhesin-like protein	1.23391	0.01749
orf19.2667_791	ORF19.2667	RPF1	Putative nucleolar protein with a predicted role in the assembly and export of the large ribosomal subunit; essential for growth; rat catheter and Spider biofilm induced	1.23388	0.01371
orf19.3865_1107	ORF19.3865	RFX1	Transcription factor; involved in DNA damage responses, morphogenesis, and virulence; Spider biofilm induced	1.23367	0.0297
orf19.6770_514	ORF19.6770		protein with ENTH Epsin domain, N-terminal; Spider biofilm repressed	1.23362	0.12419
orf19.3407_999	ORF19.3407	RAD18	Putative transcription factor with zinc finger DNA-binding motif; Hap43p-repressed gene	1.23349	0.02229
orf19.4622_801	ORF19.4622		Ortholog(s) have role in telomere maintenance, transcription-coupled nucleotide-excision repair, ubiquitin-dependent protein catabolic process and nucleus localization	1.23343	0.12378
orf19.2917_1396	ORF19.2917		Putative GTPase; heterozygous null mutant exhibits resistance to parnafungin in the C. albicans fitness test; Hap43p-induced gene	1.233	0.05998
orf19.7042_644	ORF19.7042		Protein of unknown function; induced by benomyl or in an azole-resistant strain overexpressing MDR1; induced by nitric oxide; Spider biofilm induced	1.23279	0.01866
orf19.2463_890	ORF19.2463	PRN2	Protein similar to pirin; Hap43p-repressed gene	1.23257	0.05676
orf19.1285_2735	ORF19.1285		Plasma membrane-localized protein of unknown function; Hap43p-repressed gene	1.23248	0.16638
orf19.6730_592	ORF19.6730		Ortholog(s) have nucleolus localization	1.23228	0.01665
orf19.1789_613	ORF19.1789		Ortholog(s) have mitochondrion localization	1.23222	0.03513
orf19.4761_1897	ORF19.4761	HST1	Putative histone deacetylase, involved in regulation of white-opaque switching	1.23218	0.2421
orf19.1199_1333	ORF19.1199	NOP5	Ortholog of S. cerevisiae Nop58; involved in pre-rRNA process; Tn mutation affects filamentous growth; macrophage/pseudohyphal-induced; physically interacts with TAP-tagged Nop1; Spider biofilm repressed	1.23215	0.06756
orf19.1114_367	ORF19.1114		Cytochrome c oxidase subunit; membrane-localized protein; rat catheter biofilm induced	1.23212	0.11944
orf19.1977_536	ORF19.1977	URA4	Dihydroorotase; protein present in exponential and stationary growth phase yeast cultures	1.23205	0.10395
orf19.6045_1714	ORF19.6045		Putative phosphatidylserine decarboxylase; involved in phosphatidylethanolamine; Spider biofilm repressed	1.23181	0.02413
orf19.5393_1424	ORF19.5393		Putative cysteine sulfinate decarboxylase; transcript positively regulated by Tbf1; Spider biofilm induced	1.23131	0.08938
orf19.3233_824	ORF19.3233	HSE1	ESCRT-0 complex subunit; SH3-domain-containing protein	1.23129	0.13027
orf19.5938_5692	ORF19.5938	SEN1	Putative helicase; repressed by prostaglandins	1.23123	0.0149
orf19.4093_1490	ORF19.4093	PES1	Pescadillo homolog required for yeast cell growth, lateral yeast growth on filamentous cells and virulence in mice; hyphal cells grow normally in mutant; mutation confers hypersensitivity to 5-fluorocytosine, 5-fluorouracil, tubercidin	1.23101	0.0342
orf19.2978_299	ORF19.2978		Protein of unknown function; Hap43-repressed gene	1.2308	0.17962
orf19.5132_285	ORF19.5132		Protein of unknown function; transcript detected on high-resolution tiling arrays; Spider biofilm induced	1.23074	0.21137
orf19.5989_939	ORF19.5989		Putative cleavage factor I subunit; required for the cleavage and polyadenylation of pre-mRNA 3' ends; Spider biofilm repressed	1.23056	0.00317
orf19.4928_1840	ORF19.4928	SEC2	Guanyl-nucleotide exchange factor for the small G-protein Sec4; delivery of post-Golgi secretory vesicles to sites of polarized growth; phosphorylation by Cdc28 needed for normal hyphal growth; Hap43-repressed; flow model biofilm induced	1.23053	0.03173
orf19.5133_3066	ORF19.5133	ZCF29	Zn(II)2Cys6 transcription factor; mutants sensitive to caffeine and menadione, resistant to fenpropimorph; Hap43-repressed; mutants have decreased CFU in mouse kidneys and defects in filamentous growth; Spider biofilm induced	1.2304	0.11828
orf19.2236_3073	ORF19.2236	FHL1	Fork-head transcription factor; forms a heterodimer with Ifh1 that is tethered to promoters by Tbf1; positively regulates rRNA and ribosomal protein gene transcription	1.23029	0.01324
orf19.6955_1266	ORF19.6955	HBR3	Essential protein; regulated by hemoglobin; S. cerevisiae ortholog is essential; Hap43p-induced gene	1.23019	0.05298
orf19.5433_23	ORF19.5433		Ortholog(s) have protein binding involved in protein folding activity, role in mitochondrial respiratory chain complex III assembly and mitochondrial matrix localization	1.23015	0.03798
orf19.5841_642	ORF19.5841		Ortholog of C. dubliniensis CD36 : Cd36_17700, C. parapsilosis CDC317 : CPAR2_212340, Candida tenuis NRRL Y-1498 : CANTEDRAFT_101113 and Debaryomyces hansenii CBS767 : DEHA2G03784g	1.23013	0.03965
CaalfMp08.2_1436	CaalfMp08.2		Putative endonuclease encoded by the first two exons and part of the second intron of the mitochondrial COX1 gene; C-terminus contains a LAGLIDADG domain found in intron-encoded endonucleases; conserved in fungal mitochondria	1.23012	0.05184
orf19.7509.2_124	ORF19.7509.2	LSM6	Putative Lsm protein; flucytosine induced	1.23008	0.19704
orf19.6160_1443	ORF19.6160		Ortholog(s) have role in eisosome assembly and eisosome, membrane raft, mitochondrion, plasma membrane localization	1.23005	0.14984
orf19.5058_1625	ORF19.5058	SMI1	Cell wall biosynthesis protein; Hap43, caspofungin-repressed; Cyr1-induced in hyphal cells; reduced biofilm cell wall glucan in mutant; possibly essential (UAU1 method); flow model biofilm induced	1.22986	0.01266
orf19.7046_333	ORF19.7046	MET28	Predicted bZIP domain-containing transcription factor; protein induced during the mating process; possibly essential, disruptants not obtained by UAU1 method; Hap43-repressed; rat catheter biofilm induced	1.22949	0.00166
orf19.1893_2309	ORF19.1893		Protein of unknown function; Spider biofilm repressed	1.22912	0.0457
orf19.5114_193	ORF19.5114		Sorting nexin; role in maintaining late-Golgi resident enzymes in their proper location by recycling molecules from the prevacuolar compartment; Spider biofilm induced	1.22909	0.09021
orf19.3303_2008	ORF19.3303		Ortholog(s) have tRNA methyltransferase activity, role in tRNA methylation, wybutosine biosynthetic process and cytosol, mitochondrion, nucleus localization	1.22898	0.13166
orf19.6689_1327	ORF19.6689	ARG4	Argininosuccinate lyase, catalyzes the final step in the arginine biosynthesis pathway; alkaline downregulated; flow model biofilm induced; Spider biofilm induced	1.22896	0.03398
orf19.7067_2817	ORF19.7067		Ortholog(s) have RNA polymerase II core binding, RNA polymerase II transcription factor binding transcription factor activity, triplex DNA binding activity	1.22846	0.01513
orf19.681_1091	ORF19.681	HAP43	CCAAT-binding factor-dependent transcription factor; repressor; also called CAP2; required for low iron response; similar to bZIP transcription factor AP-1; repressed by Sfu1; ciclopirox olamine induced; rat catheter, Spider biofilm induced	1.22846	0.01943
orf19.7551_1614	ORF19.7551	ALO1	D-Arabinono-1,4-lactone oxidase involved in biosynthesis of dehydro-D-arabinono-1,4-lactone, which has a protective role against oxidative damage; plasma membrane-localized;required for full virulence in a mouse model of systemic infection	1.22823	0.04194
orf19.177_1947	ORF19.177		Has domain(s) with predicted phosphatidylinositol binding activity and role in cell communication	1.2282	0.06188
orf19.4089_1183	ORF19.4089	SGT1	Putative co-chaperone protein with a predicted role in kinetochore assembly; mutation confers hypersensitivity to radicicol; sumoylation target	1.22816	0.00921
orf19.7368_1360	ORF19.7368		Ortholog(s) have mRNA binding, poly(U) RNA binding activity and role in nuclear-transcribed mRNA catabolic process, nonsense-mediated decay, regulation of mRNA stability, stress granule assembly	1.22811	0.00285
orf19.7127_345	ORF19.7127	TLO16	Member of a family of telomere-proximal genes of unknown function; may be spliced in vivo	1.22804	0.03084
orf19.3932_728	ORF19.3932		Predicted RNA binding protein; stationary phase enriched; induced in core caspofungin response; induced by nitric oxide independent of Yhb1; repressed in ssr1 null; ketoconazole, hypoxia induced; Spider biofilm induced	1.22794	0.10637
orf19.6837_703	ORF19.6837	FMA1	Putative oxidoreductase; induced by ciclopirox olamine; upregulation correlates with clinical development of fluconazole resistance; Spider biofilm repressed	1.22783	0.05061
orf19.6112_167	ORF19.6112	CTA2	Putative transcription factor; Med2 mediator domain; activates transcription in 1-hybrid assay in S. cerevisiae; repressed by Efg1; member of a family of telomere-proximal genes; Tbf1-induced	1.22766	0.0249
orf19.5595_1122	ORF19.5595	SHE3	mRNA-binding protein that localizes specific mRNAs to daughter yeast cells and to hyphal tips; required for normal filamentation and host epithelial cell damage; ortholog of S. cerevisiae She3 but target mRNAs differs	1.22766	0.00081
orf19.1745_324	ORF19.1745		Protein of unknown function; Hap43-repressed gene	1.22764	0.14939
orf19.4882_757	ORF19.4882		TFIIE small subunit; involved in RNA polymerase II transcription initiation; Spider biofilm induced	1.22762	0.08446
orf19.10_1398	ORF19.10	ALK8	Alkane-inducible cytochrome P450; catalyzes hydroxylation of lauric acid to hydroxylauric acid; overproduction causes fluconazole resistance in WT and causes multidrug resistance in a cdr1 cdr2 double mutant; rat catheter biofilm repressed	1.22747	0.29978
orf19.4662_1398	ORF19.4662	RLM1	Putative transcription factor; required for wild-type resistance to cell wall perturbation, caspofungin treatment; regulates caspofungin induction of PGA13	1.22745	0.06512
orf19.761_1865	ORF19.761	TCO89	Putative homolog of S. cerevisiae Tco89p, which is a component of the TOR C1 complex that is involved in the regulation of growth and cell wall integrity; heterozygous null mutant displays sensitivity to rapamycin	1.22744	0.08265
orf19.7317_1323	ORF19.7317	UGA33	Zinc-finger transcription factor; similar to S. cerevisiae Uga3 which regulates gamma-aminobutyrate metabolism gene expression; required for yeast cell adherence to silicone substrate; rat catheter biofilm induced	1.22743	0.29902
orf19.4716_1283	ORF19.4716	GDH3	NADP-glutamate dehydrogenase; Nrg1, Plc1 regulated; hypha, hypoxia, Efg1-repressed; Rim101-induced at pH 8; GlcNAc, ciclopirox, ketoconazole induced; exp and stationary phase protein; Spider biofilm repressed; rat catheter biofilm induced	1.22709	0.1008
orf19.3232_1507	ORF19.3232		Putative transporter; mutation confers hypersensitivity to toxic ergosterol analog; fungal-specific (no human or murine homolog)	1.22691	0.00177
orf19.6058_896	ORF19.6058	GLO1	Putative monomeric glyoxalase I; oxidative stress-induced via Cap1; flow model and rat catheter biofilm repressed	1.2269	0.02744
orf19.4921_1966	ORF19.4921		Ortholog of C. dubliniensis CD36 : Cd36_12030 and Candida albicans WO-1 : CAWG_00152	1.22667	0.10599
orf19.5441_2354	ORF19.5441	ULP3	SUMO deconjugation enzyme that removes the small ubiquitin-like modifier (SUMO) from proteins	1.22659	0.01429
orf19.2046_878	ORF19.2046	POT1-2	Putative peroxisomal 3-ketoacyl CoA thiolase; Hap43-repressed	1.22656	0.12225
orf19.7114_2663	ORF19.7114	CSA1	Surface antigen on elongating hyphae and buds; strain variation in repeat number; ciclopirox, filament induced, alkaline induced by Rim101; Efg1-, Cph1, Hap43-regulated; required for WT RPMI biofilm formation; Bcr1-induced in a/a biofilms	1.2265	0.12119
orf19.5408_974	ORF19.5408	HRK1	Putative serine/threonine kinase; predicted role in cellular ion homeostasis; Spider biofilm repressed	1.2264	0.13586
orf19.6040_464	ORF19.6040	SNF7	ESCRT III complex protein; role in proteolytic activation of Rim101 and Rim8 processing/activation; separable roles in RIM101 pathway and in transport from MVB to vacuole; involved in echinocandin and azole sensitivity	1.2263	0.05733
orf19.3555_2345	ORF19.3555	BUD14	Putative SH3-domain-containing protein; predicted role in bud-site selection; Spider biofilm induced	1.22618	0.09675
orf19.267_2175	ORF19.267		Protein required for normal filamentous growth; mRNA binds She3	1.226	0.0521
orf19.1352_456	ORF19.1352	TIM22	Mitochondrial inner membrane protein; predicted role in protein import; Hap43-repressed gene; flow model biofilm induced; Spider biofilm repressed	1.22586	0.00099
orf19.5204_1579	ORF19.5204		Ortholog(s) have role in cellular response to methylmercury and cytoplasm, nucleus localization	1.22584	0.10729
orf19.5401_1833	ORF19.5401			1.2257	0.09251
orf19.2112_574	ORF19.2112		snRNP U5 splicing factor component; involved in positioning the 3' splice site during the 2nd catalytic step of splicing; Spider biofilm induced	1.22553	0.05886
orf19.991_987	ORF19.991	DJP1	Similar to bacterial DnaJ; reported to have a role in peroxisome biogenesis; induced in low iron and upon adherence to polystyrene	1.2251	0.00709
orf19.7183_472	ORF19.7183		Ortholog(s) have role in protein folding in endoplasmic reticulum and ER membrane protein complex localization	1.22501	0.06357
orf19.4896_358	ORF19.4896	RPA34	Putative RNA polymerase I subunit; rat catheter biofilm induced	1.2249	0.22324
orf19.6171_2322	ORF19.6171	NUP159	FG-nucleoporin component of central core of the nuclear pore complex (NPC); contributes to nucleocytoplasmic transport; rat catheter biofilm repressed	1.22489	0.02426
orf19.3813_1268	ORF19.3813		Ortholog of C. dubliniensis CD36 : Cd36_44340, C. parapsilosis CDC317 : CPAR2_302240, Candida tenuis NRRL Y-1498 : CANTEDRAFT_105331 and Debaryomyces hansenii CBS767 : DEHA2E03454g	1.22486	0.00233
orf19.1522_3051	ORF19.1522		Ortholog of C. dubliniensis CD36 : Cd36_16850, C. parapsilosis CDC317 : CPAR2_211990, Candida tenuis NRRL Y-1498 : cten_CGOB_00169 and Debaryomyces hansenii CBS767 : DEHA2G03036g	1.22475	0.09566
orf19.7094_1522	ORF19.7094	HGT12	Glucose, fructose, mannose transporter; major facilitator superfamily; role in macrophage-induced hyphal growth; detected at germ tube plasma membrane by mass spectrometry; Snf3p-induced; 12 probable transmembrane segments	1.22459	0.27964
orf19.4148_748	ORF19.4148		Ortholog of C. dubliniensis CD36 : Cd36_50820, C. parapsilosis CDC317 : CPAR2_501670, Candida tenuis NRRL Y-1498 : CANTEDRAFT_115294 and Debaryomyces hansenii CBS767 : DEHA2E13464g	1.22454	0.04438
orf19.371_615	ORF19.371		Ortholog of C. dubliniensis CD36 : Cd36_40110, C. parapsilosis CDC317 : CPAR2_402300, Candida tenuis NRRL Y-1498 : CANTEDRAFT_94507 and Debaryomyces hansenii CBS767 : DEHA2F05588g	1.2245	0.10774
orf19.6887_274	ORF19.6887		Predicted ORF from Assembly 19; repressed by nitric oxide; removed from Assembly 20; subsequently reinstated in Assembly 21 based on comparative genome analysis	1.22447	0.26635
orf19.6846_868	ORF19.6846	PHO85	Functional homolog of S. cerevisiae Pho85p, a cyclin-dependent kinase that regulates transcription of PHO genes involved in phosphate metabolism; necessary for geldanamycin-induced filamentation; gene has intron	1.22441	0.03117
orf19.4734_788	ORF19.4734		Protein of unknown function; Hap43-repressed	1.22393	0.10319
orf19.5664_1549	ORF19.5664	HOF1	Ortholog of S. cerevisiae Hof1; a protein localized to the bud neck and required for cytokinesis in S. cerevisiae; periodic mRNA expression, peak at cell-cycle G2/M phase; mutant is viable	1.22379	0.16716
orf19.3553_801	ORF19.3553	RPF2	Putative pre-rRNA processing protein; Hap43p-induced gene; mutation confers hypersensitivity to 5-fluorocytosine (5-FC), 5-fluorouracil (5-FU), and tubercidin (7-deazaadenosine)	1.22364	0.23751
orf19.5376_2190	ORF19.5376		Ortholog of S. cerevisiae Elm1; a serine/threonine protein kinase that regulates cellular morphogenesis, septin behavior, and cytokinesis in S. cerevisiae; possibly an essential gene, disruptants not obtained by UAU1 method	1.22351	0.23746
orf19.1915_1599	ORF19.1915	MPP10	Putative SSU processome and 90S preribosome component; repressed in core stress response; repressed by prostaglandins	1.22344	0.00496
orf19.5660.1_88	ORF19.5660.1		Ortholog(s) have proton-transporting ATPase activity, rotational mechanism, structural molecule activity and role in ATP synthesis coupled proton transport, cristae formation, protein complex oligomerization	1.22337	0.05888
orf19.1485_274	ORF19.1485		Mitochondrial ribosomal protein of the large subunit; rat catheter biofilm induced	1.22311	0.15783
orf19.4358_244	ORF19.4358		Putative protein of unknown function; Hap43p-repressed gene; S. cerevisiae ortholog YDL157C localizes to mitochondria	1.22294	0.03255
orf19.4932_1555	ORF19.4932		Ortholog(s) have role in mitochondrial translation and mitochondrion localization	1.22285	0.00118
orf19.661_1018	ORF19.661	KRR1	Putative nucleolar protein; repressed benomyl treatment or in an azole-resistant strain that overexpresses MDR1; F-12/CO2 early biofilm induced	1.22272	0.04882
orf19.7254_1741	ORF19.7254		Ortholog(s) have role in mRNA metabolic process, mitochondrial translational initiation and extrinsic to membrane, mitochondrial inner membrane localization	1.2227	0.0257
orf19.6400_574	ORF19.6400		Ortholog(s) have role in inositol metabolic process and cytosol, nuclear envelope localization	1.22258	0.04363
orf19.5308_285	ORF19.5308		Protein of unknown function; induced by Rgt1	1.22255	0.1762
orf19.4187_914	ORF19.4187		Ortholog(s) have role in hyphal growth, mitochondrial genome maintenance, phospholipid transport, protein import into mitochondrial outer membrane, sporocarp development involved in sexual reproduction	1.22246	0.01389
orf19.4522_101	ORF19.4522		Ortholog(s) have role in response to drug and cytosol, nucleus localization	1.22233	0.11835
orf19.7244_602	ORF19.7244		Putative fumarylacetoacetate hydrolase; induced by nitric oxide independent of Yhb1; regulated by Sef1, Sfu1, Hap43; flow model biofilm induced	1.22226	0.04652
orf19.1642_470	ORF19.1642		Ortholog of S. cerevisiae Loc1, a nuclear protein involved in asymmetric localization of ASH1 mRNA in S. cerevisiae; Hap43-induced gene; Spider biofilm induced	1.22213	0.21757
orf19.346_229	ORF19.346	ALT1	Putative alanine transaminase; mutation confers hypersensitivity to 5-fluorocytosine (5-FC); rat catheter and flow model biofilm induced	1.22197	0.34266
orf19.2859_1228	ORF19.2859	SRP40	Putative chaperone of small nucleolar ribonucleoprotein particles; macrophage/pseudohyphal-induced; rat catheter biofilm induced	1.22185	0.26865
orf19.2376_672	ORF19.2376		Has domain(s) with predicted DNA 5'-adenosine monophosphate hydrolase activity, DNA binding activity and role in DNA repair	1.22184	0.04917
orf19.6045_1639	ORF19.6045		Putative phosphatidylserine decarboxylase; involved in phosphatidylethanolamine; Spider biofilm repressed	1.22178	0.0315
orf19.364_948	ORF19.364		Putative vacuolar H+-ATPase subunit; possibly an essential gene, disruptants not obtained by UAU1 method; Spider biofilm repressed	1.22175	0.02997
orf19.6736_1827	ORF19.6736		Protein required for mitochondrial ribosome small subunit biogenesis; role in maturation of SSU-rRNA; Spider biofilm induced	1.22174	0.00851
orf19.7023_577	ORF19.7023		Ortholog of S. cerevisiae Ioc4, a protein that influences gene expression through chromatin remodeling; oxidative stress-induced via Cap1	1.2217	0.00869
orf19.6724_1276	ORF19.6724	FUM12	Putative fumarate hydratase; enzyme of citric acid cycle; fluconazole, Efg1 repressed; induced in high iron; protein present in exponential and stationary growth phase	1.22158	0.07722
orf19.407_1453	ORF19.407	GCD6	Ortholog of S. cerevisiae Gcd6; catalytic epsilon subunit of the translation initiation factor eIF2B; genes encoding translation factors are repressed by phagocytosis by murine macrophages	1.22152	0.0201
orf19.3809_2057	ORF19.3809	BAS1	Putative Myb-like transcription factor; ortholog S. cerevisiae Bas1, a regulator of purine biosynthetic genes; mutant exhibits adenine auxotrophy and abnormal colony morphology	1.22149	0.02942
orf19.6626_405	ORF19.6626		Predicted homeodomain-containing protein; possible transcription factor; possibly transcriptionally regulated upon hyphal formation	1.22143	0.0834
orf19.3091_3913	ORF19.3091		Protein of unknown function; repressed during core stress response	1.22131	0.04757
orf19.3064_448	ORF19.3064	MRPL27	Putative 60S ribosomal protein L27, mitochondrial precursor	1.22123	0.28061
orf19.2681_821	ORF19.2681	RBT7	Protein with similarity to RNase T2 enzymes; has putative secretion signal; expression is Tup1-repressed	1.22117	0.00919
orf19.6008.4_187	ORF19.6008.4		Ortholog(s) have mitochondrion localization	1.22098	0.00361
orf19.6893_772	ORF19.6893		Ortholog(s) have role in ER to Golgi vesicle-mediated transport, cellular response to cadmium ion, detoxification of cadmium ion	1.22093	0.00842
orf19.279_153	ORF19.279		Protein with a predicted D-Tyr-tRNA(Tyr) deacylase domain; Hap43-repressed gene	1.22083	0.06947
orf19.3363_2035	ORF19.3363	VTC4	Putative polyphosphate synthetase; decreased expression in hyphae compared to yeast-form cells; fungal-specific (no human or murine homolog); virulence-group-correlated expression	1.22072	0.21568
orf19.1543_902	ORF19.1543	OPI1	Leucine zipper transcription factor; repressor of INO1 involved in inositol biosynthesis; functional homolog of S. cerevisiae Opi1; has putative Opi1-Sin3 interaction domain; interacts with ScSin3, but not CaSin3	1.22049	0.01631
orf19.1185_1032	ORF19.1185		Ortholog(s) have protein homodimerization activity, ubiquitin-protein ligase activity	1.22031	0.02813
orf19.3752_1027	ORF19.3752	RAD51	Protein involved in homologous recombination and DNA repair; flucytosine induced; slow growth and increased white-to-opaque switching frequency in null mutant	1.21968	0.01068
orf19.4305.1_283	ORF19.4305.1		Ortholog(s) have RNA binding activity, role in mRNA splicing, via spliceosome and U4/U6 x U5 tri-snRNP complex, U6 snRNP, nucleolus localization	1.21938	0.12041
orf19.4186_1124	ORF19.4186	PCT1	Putative choline-phosphate cytidylyl transferase, antigenic during human oral infection	1.21936	0.00082
orf19.7181_1565	ORF19.7181		Ortholog of C. dubliniensis CD36 : Cd36_73670, C. parapsilosis CDC317 : CPAR2_702370, Candida tenuis NRRL Y-1498 : CANTEDRAFT_119320 and Debaryomyces hansenii CBS767 : DEHA2G16632g	1.21934	0.05099
orf19.313_1603	ORF19.313	DAL4	Putative allantoin permease; fungal-specific (no human or murine homolog)	1.21928	0.05882
orf19.3303_1101	ORF19.3303		Ortholog(s) have tRNA methyltransferase activity, role in tRNA methylation, wybutosine biosynthetic process and cytosol, mitochondrion, nucleus localization	1.21917	0.11085
orf19.341_1844	ORF19.341		Putative spermidine export pump; fungal-specific (no human or murine homolog)	1.21914	0.28444
orf19.27_1078	ORF19.27		Ortholog of C. dubliniensis CD36 : Cd36_20860, C. parapsilosis CDC317 : CPAR2_104250, Candida tenuis NRRL Y-1498 : CANTEDRAFT_115100 and Debaryomyces hansenii CBS767 : DEHA2E10450g	1.21913	0.1159
orf19.5246_1091	ORF19.5246		Protein of unknown function; Hap43-repressed gene	1.21906	0.0456
orf19.7402_3896	ORF19.7402	DOT1	Putative modulator of white-opaque switching	1.21891	0.01956
orf19.1496_1166	ORF19.1496		Putative transcription factor with zinc finger DNA-binding motif; Hap43p-repressed gene	1.21879	0.19464
orf19.3066_3280	ORF19.3066	ENG1	Endo-1,3-beta-glucanase; ortholog of S. cerevisiae Dse4 needed for cell separation; caspofungin, fluconazole repressed; repressed by alpha pheromone in SpiderM medium; flow model biofilm induced; rat catheter biofilm repressed	1.21878	0.10768
orf19.2253_1345	ORF19.2253		Protein of unknown function; expression regulated by white-opaque switch; repressed by alpha pheromone in SpiderM medium; Spider biofilm induced	1.21862	0.00028
orf19.3139_1060	ORF19.3139		Putative NADP-dependent oxidoreductase; Hap43-repressed; induced by benomyl treatment; oxidative stress-induced via Cap1; rat catheter biofilm repressed	1.21851	0.04758
orf19.7460_1070	ORF19.7460		Putative 2'-O-methyltransferase with a predicted role in tRNA modification; transcription is activated in the presence of elevated CO2	1.21849	0.00268
orf19.7250_385	ORF19.7250		Protein of unknown function; rat catheter and Spider biofilm induced	1.21842	0.10919
orf19.6225.1_71	ORF19.6225.1		Ortholog(s) have role in mitochondrial respiratory chain complex IV assembly and mitochondrion localization	1.2182	0.01693
orf19.6820_1484	ORF19.6820		Has domain(s) with predicted protein heterodimerization activity, role in DNA-dependent transcription, initiation and transcription factor TFIID complex localization	1.21802	0.0375
orf19.4415_262	ORF19.4415	MED3	RNA polymerase II mediator complex subunit	1.21784	0.00643
orf19.446_731	ORF19.446		Protein of unknown function; constitutive expression independent of MTL or white-opaque status; upregulated in a cyr1 mutant	1.21775	0.31761
orf19.7366_833	ORF19.7366		Ortholog(s) have S-adenosylmethionine-dependent methyltransferase activity and nucleolus localization	1.21768	0.06337
orf19.6086_1568	ORF19.6086	LEU4	Putative 2-isopropylmalate synthase; regulated by Nrg1, Mig1, Tup1, Gcn4; induced by human whole blood or PMNs; macrophage/pseudohyphal-repressed after 16h; Spider biofilm repressed	1.21755	0.15558
orf19.6838_717	ORF19.6838		Putative protein of unknown function, transcript upregulated in clinical isolates from HIV+ patients with oral candidiasis; Spider biofilm induced	1.21746	0.02279
orf19.1693_7813	ORF19.1693	CAS4	RAM cell wall integrity signaling network protein; cell separation, azole sensitivity; needed for hyphal growth; insertion mutation near 3' end of gene increases caspofungin sensitivity; pheromone/hyphal induced; flow biofilm repressed	1.21721	0.26281
orf19.7116_751	ORF19.7116		Protein of unknown function; transcript induced in RHE model of oral candidiasis; Spider biofilm repressed	1.21712	0.11943
orf19.5459_950	ORF19.5459		mRNA polyadenylation regulating protein; Hap43-repressed; transcript is upregulated in RHE model of oral candidiasis and in clinical isolates from HIV+ patients with oral candidiasis; Spider biofilm repressed	1.21708	0.01299
orf19.563_633	ORF19.563	RRP15	Putative nucleolar protein; constituent of pre-60S ribosomal particles; Hap43-induced; repressed by prostaglandins	1.21693	0.06835
orf19.6525_1934	ORF19.6525		S. cerevisiae ortholog Inp1 is a peripheral membrane protein of peroxisomes involved in peroxisomal inheritance; induced by Mnl1 under weak acid stress	1.21678	0.12907
orf19.5011_2191	ORF19.5011	KAR9	Ortholog of S. cerevisiae Kar9; role in mitotic spindle positioning; nonessential; localizes to bud tip, bud neck, hyphal tip; wild-type localization requires actin and microtubule cytoskeleton; induced by alpha factor	1.21661	0.07103
orf19.7519_69	ORF19.7519		Ortholog of C. dubliniensis CD36 : Cd36_25180, C. parapsilosis CDC317 : CPAR2_800030, Candida tenuis NRRL Y-1498 : CANTEDRAFT_125790 and Debaryomyces hansenii CBS767 : DEHA2E18260g	1.21656	0.0639
orf19.2398_805	ORF19.2398		Protein of unknown function; Hap43-repressed; transcript increased in azole-resistant strain overexpressing CDR1 and CDR2; possibly regulated by Tac1; induced by Mnl1 in weak acid stress; flow model biofilm induced; Spider biofilm induced	1.21656	0.19307
orf19.7665_136	ORF19.7665		Ortholog(s) have role in mitochondrial respiratory chain complex IV assembly and mitochondrial inner membrane localization	1.21652	0.01407
orf19.448_164	ORF19.448	CUE5	Predicted ubiquitin-binding protein; rat catheter biofilm repressed	1.2165	0.01469
orf19.4107_1144	ORF19.4107		Exopolyphosphatase, hydrolyzes inorganic polyphosphate (poly P) into Pi residues; Spider biofilm repressed	1.21605	0.00234
orf19.3674_878	ORF19.3674	GAL102	UDP-glucose 4,6-dehydratase; role in mannosylation of cell wall proteins; mutation confers hypersensitivity to toxic ergosterol analog; overlaps orf19.3673; Spider biofilm induced	1.21598	0.06083
orf19.7655_4059	ORF19.7655	RPO21	RNA polymerase II; ortholog of S. cerevisiae Rpo21, transposon mutation affects filamentous growth; flow model biofilm repressed	1.21596	0.43827
orf19.5684_332	ORF19.5684		Ortholog(s) have structural constituent of ribosome activity and mitochondrial large ribosomal subunit localization	1.21591	0.02254
orf19.329_947	ORF19.329		Putative pre-mRNA branch point binding protein; role in mRNA splicing via spliceosome; Spider biofilm repressed	1.21578	0.00678
orf19.4448_2002	ORF19.4448	SOG2	Leucine-rich-repeat domain protein of RAM cell wall integrity signaling network; role in cell separation, azole sensitivity; required for hyphal growth; lacks orthologs in higher eukaryotes	1.2157	0.05579
orf19.4792_1541	ORF19.4792		Protein with a regulator of G-protein signaling domain; Plc1-regulated; Spider biofilm induced; rat catheter biofilm repressed	1.21567	0.14759
orf19.5350_814	ORF19.5350		Ortholog(s) have cyclin-dependent protein serine/threonine kinase activity	1.21546	0.01671
orf19.6197_1265	ORF19.6197	DHH1	Putative RNA helicase	1.21538	0.22079
orf19.2593_997	ORF19.2593	BIO2	Putative biotin synthase; induced by high iron; repressed by ciclopirox olamine; upregulated in clinical isolates from HIV+ patients with oral candidiasis; Hap43-repressed; Spider biofilm induced	1.21533	0.0147
orf19.730_2540	ORF19.730		Ortholog(s) have Rho GTPase activator activity and role in establishment or maintenance of actin cytoskeleton polarity, small GTPase mediated signal transduction	1.21532	0.0131
orf19.6498_951	ORF19.6498		Ortholog(s) have role in RNA polymerase II complex localization to nucleus, RNA polymerase III complex localization to nucleus and DNA-directed RNA polymerase II, holoenzyme, cytoplasm localization	1.21522	0.07547
orf19.4317_955	ORF19.4317	GRE3	Putative D-xylose reductase; antigenic in murine systemic infection; soluble protein in hyphae; induced by farnesol, macrophage interaction and by Mnl1 under weak acid stress; stationary-phase enriched protein; Spider biofilm induced	1.21505	0.16759
orf19.7328_2647	ORF19.7328		Protein with a Staphylococcal nuclease domain; transcript regulated by Mig1 and Tup1; flow model and Spider biofilm repressed	1.21472	0.06302
orf19.4069_88	ORF19.4069		Protein of unknown function; repressed by alpha pheromone in SpiderM medium	1.21452	0.07481
orf19.2897_493	ORF19.2897	SOU2	Protein similar to Sou1; not required for utilization of L-sorbose; Spider biofilm induced	1.2145	0.04444
orf19.7095_1114	ORF19.7095		Ortholog(s) have endoplasmic reticulum localization	1.21436	0.01323
orf19.7103_1036	ORF19.7103		Predicted exonuclease; Spider biofilm induced	1.21422	0.07552
orf19.1305_1291	ORF19.1305		Ortholog(s) have tRNA (guanine) methyltransferase activity, role in tRNA methylation and mitochondrial matrix, nucleus localization	1.2141	0.00598
orf19.727_1332	ORF19.727		Predicted ORF overlapping the Major Repeat Sequence on chromosome R; member of a family encoded by FGR6-related genes in the RB2 repeat sequence	1.2139	0.3978
orf19.6944_334	ORF19.6944	PHB1	Putative prohibitin; identified in detergent-resistant membrane fraction (possible lipid raft component); predicted N-terminal acetylation; Hap43p-repressed gene	1.21385	0.01268
orf19.4257_4931	ORF19.4257	INT1	Protein structurally similar to alpha-subunit of human leukocyte integrin; role in morphogenesis, adhesion, and mouse cecal colonization and systemic virulence; similar to S. cerevisiae Bud4; Hap43-induced gene	1.21378	0.13533
orf19.2797_1321	ORF19.2797		Has domain(s) with predicted ATP binding, DNA binding, helicase activity	1.21364	0.008
orf19.2039_1080	ORF19.2039	MSF1	Putative phenylalanine-tRNA ligase; protein level decreases in stationary phase cultures; Hap43p-repressed gene	1.21363	0.05085
orf19.5334_400	ORF19.5334		Ortholog od S. cerevisiae Tis11, a mRNA-binding protein; transcription regulated by yeast-hyphal switch; flow model biofilm induced; Spider biofilm repressed	1.21362	0.02816
orf19.4033_2704	ORF19.4033	PRP22	Putative RNA-dependent ATPase; induced upon adherence to polystyrene; induced by Mnl1p under weak acid stress	1.21306	0.05462
orf19.7443_157	ORF19.7443		Ortholog of C. dubliniensis CD36 : Cd36_86510, C. parapsilosis CDC317 : CPAR2_206110, Candida tenuis NRRL Y-1498 : CANTEDRAFT_112184 and Debaryomyces hansenii CBS767 : DEHA2F17292g	1.21295	0.01463
orf19.5167_2245	ORF19.5167	IFM1	Putative mitochondrial translation initiation factor; transcript regulated by Nrg1, Mig1, and Tup1	1.21274	0.01521
orf19.2933_943	ORF19.2933		Ortholog(s) have ubiquitin-specific protease activity, role in protein deubiquitination, regulation of transcription, DNA-dependent and cytosol, nucleus localization	1.2127	0.22237
orf19.2684_1800	ORF19.2684		Protein of unknown function; flow model biofilm repressed	1.21241	0.01439
orf19.2274_575	ORF19.2274		Ortholog of C. dubliniensis CD36 : Cd36_21450, Candida tropicalis MYA-3404 : CTRG_01739 and Candida albicans WO-1 : CAWG_05814	1.21235	0.31766
orf19.6458.1_138	ORF19.6458.1		Ortholog(s) have U6 snRNA binding activity and role in cytoplasmic mRNA processing body assembly, mRNA splicing, via spliceosome	1.21233	0.11777
orf19.1114_198	ORF19.1114		Cytochrome c oxidase subunit; membrane-localized protein; rat catheter biofilm induced	1.21222	0.02822
orf19.1890_1339	ORF19.1890		Ortholog(s) have role in medium-chain fatty acid biosynthetic process	1.21218	0.09226
orf19.6103_207	ORF19.6103		Ortholog(s) have role in ascospore wall assembly and cytosol localization	1.21215	0.04398
orf19.6816_784	ORF19.6816		Putative xylose and arabinose reductase; flow model biofilm induced; Spider biofilm repressed	1.21213	0.11492
orf19.6160_1821	ORF19.6160		Ortholog(s) have role in eisosome assembly and eisosome, membrane raft, mitochondrion, plasma membrane localization	1.21212	0.1006
orf19.3423_1093	ORF19.3423	TIF3	Putative translation initiation factor; genes encoding ribosomal subunits, translation factors, and tRNA synthetases are downregulated upon phagocytosis by murine macrophage	1.21204	0.10329
orf19.4433_1612	ORF19.4433	CPH1	Transcription factor; for mating, filamentation on solid media, pheromone-stimulated biofilms; in pathway with Ess1, Czf1; required with Efg1 for host cytokine response; regulates galactose metabolism genes; rat cathether biofilm repressed	1.21192	0.00321
orf19.7331_1438	ORF19.7331	FCY24	Putative transporter; more similar to S. cerevisiae Tpn1, which is a vitamin B6 transporter, than to purine-cytosine permeases; transcription is regulated by Nrg1; Spider biofilm induced	1.21192	0.01256
orf19.3696_394	ORF19.3696	TOM22	Putative mitochondrial import receptor subunit; colony morphology-related gene regulation by Ssn6	1.21148	0.04194
orf19.4961_1445	ORF19.4961	STP2	Amino-acid-regulated transcription factor; activates transcription of amino acid permease genes; activated by amino-acid-induced proteolytic processing (Ssy1, Csh3 dependent); required for alkalinization of medium; Spider biofilm induced	1.21121	0.05572
orf19.4816_1291	ORF19.4816		Protein of unknown function; induced by nitric oxide	1.2112	0.29345
orf19.7604_2421	ORF19.7604		Ortholog(s) have Rab guanyl-nucleotide exchange factor activity	1.21118	0.05221
orf19.6561_1373	ORF19.6561	LAT1	Putative dihydrolipoamide acetyltransferase component (E2) of pyruvate dehydrogenase complex; sumoylation target; Spider biofilm repressed	1.21105	0.03694
orf19.5312_826	ORF19.5312	MET4	Putative transcription coactivator; predicted role in sulfur amino acid metabolism; required for yeast cell adherence to silicone substrate; Spider biofilm induced	1.21094	0.02533
orf19.1412_401	ORF19.1412		Ortholog of C. dubliniensis CD36 : Cd36_44020, C. parapsilosis CDC317 : CPAR2_302330, Candida tenuis NRRL Y-1498 : CANTEDRAFT_105448 and Debaryomyces hansenii CBS767 : DEHA2C10582g	1.21085	0.02642
orf19.4381_2192	ORF19.4381	VTC3	Putative polyphosphate synthetase; downregulated in core caspofungin response; Hog1p-induced; transcription is opaque-specific; fungal-specific (no human or murine homolog)	1.21074	0.0913
orf19.3113_103	ORF19.3113		Protein of unknown function; Spider biofilm induced	1.21063	0.02749
orf19.297_234	ORF19.297	DTD2	Ortholog(s) have D-leucyl-tRNA(Leu) deacylase activity, D-tyrosyl-tRNA(Tyr) deacylase activity, role in D-leucine catabolic process, D-tyrosine catabolic process, tRNA metabolic process and cytosol, nucleus localization	1.21059	0.01131
orf19.5674_81	ORF19.5674	PGA10	GPI anchored membrane protein; utilization of hemin and hemoglobin for Fe in host; Rim101 at ph8/hypoxia/ketoconazole/ciclopirox/hypha-induced; required for RPMI biofilm formation, Bcr1-induced in a/a biofilm; rat catheter biofilm repressed	1.21059	0.77391
orf19.3430_347	ORF19.3430		Plasma membrane-associated protein; physically interacts with TAP-tagged Nop1p	1.21057	0.22783
orf19.6171_2407	ORF19.6171	NUP159	FG-nucleoporin component of central core of the nuclear pore complex (NPC); contributes to nucleocytoplasmic transport; rat catheter biofilm repressed	1.21057	0.00225
orf19.2376_602	ORF19.2376		Has domain(s) with predicted DNA 5'-adenosine monophosphate hydrolase activity, DNA binding activity and role in DNA repair	1.21055	0.05414
orf19.1574_1438	ORF19.1574		Putative TFIID subunit involved in RNA polymerase II transcription initiation; possibly an essential gene, disruptants not obtained by UAU1 method	1.21047	0.05003
orf19.3328_1546	ORF19.3328		Putative transcription factor; S. cerevisiae ortholog Hot1 is required for the transient induction of glycerol biosynthetic genes GPD1 and GPP2 in response to high osmolarity; filament induced	1.21035	0.00112
orf19.6457_934	ORF19.6457		Ortholog of S. cerevisiae : YBL086C, C. glabrata CBS138 : CAGL0C01815g, C. dubliniensis CD36 : Cd36_72270, C. parapsilosis CDC317 : CPAR2_702850 and Candida tenuis NRRL Y-1498 : CANTEDRAFT_107537	1.21034	0.02801
orf19.3905_229	ORF19.3905	MRV5	Planktonic growth-induced gene	1.21033	0.00892
orf19.6233_1448	ORF19.6233		Ortholog(s) have endoplasmic reticulum, nuclear envelope localization	1.21028	0.01953
orf19.5674_504	ORF19.5674	PGA10	GPI anchored membrane protein; utilization of hemin and hemoglobin for Fe in host; Rim101 at ph8/hypoxia/ketoconazole/ciclopirox/hypha-induced; required for RPMI biofilm formation, Bcr1-induced in a/a biofilm; rat catheter biofilm repressed	1.21026	0.0092
orf19.2451_1330	ORF19.2451	PGA45	Putative GPI-anchored cell wall protein; repressed in core caspofungin response; Hog1-induced; regulated by Ssn6; Mob2-dependent hyphal regulation; flow model biofilm induced	1.21013	0.08534
orf19.6544_4014	ORF19.6544	LPI9	Protein phosphatase type 1 regulator; role in chromosome segregation, regulation of phosphoprotein phosphatase activity; rat catheter and Spider biofilm induced	1.21001	0.11819
orf19.1305_658	ORF19.1305		Ortholog(s) have tRNA (guanine) methyltransferase activity, role in tRNA methylation and mitochondrial matrix, nucleus localization	1.2096	0.0037
orf19.2117_709	ORF19.2117	LEU5	Putative mitochondrial carrier protein; Hap43-repressed; rat catheter biofilm induced	1.20944	0.13438
orf19.5345_960	ORF19.5345		Putative ubiquitin-like polyubiquitin-binding protein; induced by nitric oxide independent of Yhb1; Spider biofilm repressed	1.20935	0.04494
orf19.1668_938	ORF19.1668		Protein of unknown function; expression downregulated in an ssr1 null mutant	1.20932	0.26539
orf19.2864.1_347	ORF19.2864.1	RPL28	Putative ribosomal protein; Plc1-regulated; downregulated upon phagocytosis by murine macrophage; Spider biofilm repressed	1.20916	0.02833
orf19.4550_1763	ORF19.4550		Predicted MFS membrane transporter, member of the drug:proton antiporter (12 spanner) (DHA1) family; flow model biofilm induced	1.20901	0.159
orf19.7252_22	ORF19.7252		Ortholog of Candida albicans WO-1 : CAWG_00017	1.20899	0.1057
orf19.3050_2818	ORF19.3050	AGE1	Putative GTPase activator; induced in low iron; rat catheter biofilm repressed	1.20891	0.02877
orf19.6930_361	ORF19.6930	SOL1	Cell cycle regulator; partial functional homolog of S. cerevisiae Sic1p; protein degradation regulated by SCF(CDC4) pathway; CDK phosphorylation predicted	1.20884	0.0648
orf19.6205_374	ORF19.6205		Ortholog of C. dubliniensis CD36 : Cd36_06550, C. parapsilosis CDC317 : CPAR2_209030, Candida tenuis NRRL Y-1498 : CANTEDRAFT_111035 and Debaryomyces hansenii CBS767 : DEHA2F25300g	1.2088	0.11291
orf19.5791_912	ORF19.5791	IDH2	Putative mitochondrial NAD-isocitrate dehydrogenase subunit; induced by ciclopirox; induced in high iron; present in exponential and stationary growth phases; Spider biofilm repressed	1.20841	0.00709
orf19.6818_2638	ORF19.6818		Ortholog(s) have cytosol, mitochondrion localization	1.2083	0.00633
orf19.3077_1573	ORF19.3077	VID21	Subunit of the NuA4 histone acetyltransferase complex; soluble protein in hyphae; Spider biofilm repressed	1.20822	0.04815
orf19.6769_2083	ORF19.6769		Ortholog(s) have cytoplasm localization	1.2081	0.01654
orf19.4895_512	ORF19.4895		Ortholog of C. dubliniensis CD36 : Cd36_09650, C. parapsilosis CDC317 : CPAR2_805060, Candida tenuis NRRL Y-1498 : CANTEDRAFT_95780 and Debaryomyces hansenii CBS767 : DEHA2B12320g	1.20809	0.06113
orf19.3190_2731	ORF19.3190	HAL9	Putative Zn(II)2Cys6 transcription factor; gene in zinc cluster region of Chr. 5; induced by Mnl1 in weak acid; similar to S. cerevisiae Hal9, a putative transcription factor involved in salt tolerance	1.20787	0.04199
orf19.7662_636	ORF19.7662		Ortholog(s) have RNA polymerase II core binding activity, role in mRNA 3'-end processing, negative regulation of transposition, RNA-mediated and nuclear chromatin, site of double-strand break localization	1.20767	0.03698
orf19.1333_1678	ORF19.1333	SNG3	Putative membrane transporter; Hap43p-induced gene; mutation confers hypersensitivity to toxic ergosterol analog; shows colony morphology-related gene regulation by Ssn6p	1.20767	0.0066
orf19.4522_343	ORF19.4522		Ortholog(s) have role in response to drug and cytosol, nucleus localization	1.20758	0.12837
orf19.2605_2014	ORF19.2605	PRK1	Putative protein serine/threonine kinase; mutants sensitive to growth on hydrogen peroxide medium	1.20742	0.05468
orf19.7080_1063	ORF19.7080	LEU2	Isopropyl malate dehydrogenase; leucine biosynthesis; induced by human whole blood or PMNs; protein level decreases in stationary phase; GlcNAc-induced protein; flow model biofilm repressed	1.20726	0.01037
orf19.515_258	ORF19.515		Has domain(s) with predicted nucleic acid binding, zinc ion binding activity	1.20722	0.06286
orf19.6434_790	ORF19.6434	PEX19	Ortholog(s) have peroxisome membrane targeting sequence binding activity	1.20701	0.04846
orf19.3475_429	ORF19.3475		Described as a Gag-related protein; hyphal induced; downregulation correlates with clinical development of fluconazole resistance; repressed by nitric oxide, 17-beta-estradiol, ethynyl estradiol	1.20699	0.13557
orf19.1273_238	ORF19.1273		Ortholog(s) have tubulin binding activity, role in tubulin complex assembly and prefoldin complex localization	1.20689	0.11894
orf19.5290_1075	ORF19.5290		Protein of unknown function; repressed by Sfu1; Hap43-induced gene	1.20685	0.13742
orf19.2809_2288	ORF19.2809	CTN3	Peroxisomal carnitine acetyl transferase; no obvious metabolic, hyphal, virulence defects in Ura+ strain; induced by macrophage engulfment, hyphal growth, starvation, nonfermentable carbon sources; rat catheter, Spider biofilm induced	1.20685	0.11486
orf19.5376_2335	ORF19.5376		Ortholog of S. cerevisiae Elm1; a serine/threonine protein kinase that regulates cellular morphogenesis, septin behavior, and cytokinesis in S. cerevisiae; possibly an essential gene, disruptants not obtained by UAU1 method	1.20664	0.05435
orf19.4450_1322	ORF19.4450	ZCF23	Predicted Zn(II)2Cys6 transcription factor; ortholog of S. cerevisiae Gsm1; flow model biofilm induced	1.20659	0.00963
orf19.5358_1996	ORF19.5358		Phosphorylated protein of unknown function	1.20635	0.01672
orf19.2113_1233	ORF19.2113		Putative integral peroxisomal membrane protein; Hap43p-repressed gene	1.20625	0.01208
orf19.7107_378	ORF19.7107		Ortholog(s) have role in ribosomal large subunit biogenesis and cytoplasm, nucleus, ribosome localization	1.20617	0.0004
orf19.7510_3487	ORF19.7510	KIN2	Protein with similarity to S. cerevisiae Kin2p, transcription is positively regulated by Tbf1	1.20609	0.00883
orf19.4650_844	ORF19.4650	ILV6	Putative regulatory subunit of acetolacetate synthase; alkaline induced; regulated by Gcn2 and Gcn4; protein present in exponential and stationary growth phase yeast; Spider biofilm repressed	1.20604	0.1246
orf19.6837_392	ORF19.6837	FMA1	Putative oxidoreductase; induced by ciclopirox olamine; upregulation correlates with clinical development of fluconazole resistance; Spider biofilm repressed	1.20585	0.01519
orf19.1416_643	ORF19.1416	COX11	Cytochrome oxidase assembly protein; transcript regulated by Nrg1; protein repressed during the mating process; Hap43-repressed gene; rat catheter biofilm induced	1.20584	0.02464
orf19.4401_905	ORF19.4401	YVH1	Putative dual specificity phosphatase (phosphoserine/threonine and phosphotyrosine phosphatase); required for wild-type growth rate and for wild-type virulence in mouse model of systemic infection; Hap43p-induced gene	1.20569	0.3178
orf19.820_899	ORF19.820	SDS22	Putative protein serine-threonine phosphatase; macrophage/pseudohyphal-repressed	1.20546	0.01313
orf19.7112_1574	ORF19.7112	FRP2	Putative ferric reductase; alkaline induced by Rim101; fluconazole-downregulated; upregulated in the presence of human neutrophils; possibly adherence-induced; regulated by Sef1, Sfu1, and Hap43	1.20545	0.0958
orf19.3357_392	ORF19.3357		Ortholog(s) have mitochondrion localization	1.20543	0.09324
orf19.3884_493	ORF19.3884	FGR50	Protein lacking an ortholog in S. cerevisiae; transposon mutation affects filamentous growth; Spider biofilm repressed	1.20528	0.0386
orf19.3553_914	ORF19.3553	RPF2	Putative pre-rRNA processing protein; Hap43p-induced gene; mutation confers hypersensitivity to 5-fluorocytosine (5-FC), 5-fluorouracil (5-FU), and tubercidin (7-deazaadenosine)	1.20499	0.07202
orf19.5014_514	ORF19.5014		Ortholog(s) have mitochondrion localization	1.20464	0.07752
orf19.941_769	ORF19.941	SEC14	Essential protein; functional homolog of S. cerevisiae Sec14p, a Golgi phosphatidylinositol/phosphatidylcholine transfer protein that regulates choline-phosphate cytidyltransferase and thereby affects secretion; biofilm-regulated	1.20458	0.1162
orf19.1883_3326	ORF19.1883	YCS4	Putative condensin complex subunit; cell-cycle regulated periodic mRNA expression	1.20458	0.0025
orf19.6736_1683	ORF19.6736		Protein required for mitochondrial ribosome small subunit biogenesis; role in maturation of SSU-rRNA; Spider biofilm induced	1.20448	0.01988
orf19.1684_1383	ORF19.1684		Ortholog of C. dubliniensis CD36 : Cd36_81500, C. parapsilosis CDC317 : CPAR2_503620, Candida tenuis NRRL Y-1498 : CANTEDRAFT_93693 and Debaryomyces hansenii CBS767 : DEHA2D15268g	1.20446	0.02594
orf19.7272_85	ORF19.7272		Protein of unknown function; transcript detected on high-resolution tiling arrays	1.20438	0.08497
orf19.5215_829	ORF19.5215	TES15	Putative acyl-CoA thioesterase; Hap43-repressed; Spider biofilm induced	1.20437	0.18239
orf19.1405_899	ORF19.1405	PHO13	Putative 4-nitrophenylphosphatase; Hap43p-repressed gene; transcription is regulated upon yeast-hyphal switch	1.20436	0.09949
orf19.4148_1340	ORF19.4148		Ortholog of C. dubliniensis CD36 : Cd36_50820, C. parapsilosis CDC317 : CPAR2_501670, Candida tenuis NRRL Y-1498 : CANTEDRAFT_115294 and Debaryomyces hansenii CBS767 : DEHA2E13464g	1.20418	0.04312
orf19.3523_1140	ORF19.3523	CRK1	Protein kinase of the Cdc2 subfamily involved in hyphal development, virulence; promotes hyphal development independently of Cph1 and Efg1; functionally complements pheromone hypersensitivity of S. cerevisiae sgv1 mutant; Hap43p-repressed	1.20415	0.30311
orf19.1180_1189	ORF19.1180		Putative 2-aminoadipate transaminase; rat catheter and Spider biofilm repressed	1.20411	0.02369
orf19.7343_1210	ORF19.7343		Ortholog(s) have role in mRNA splicing, via spliceosome and U4/U6 x U5 tri-snRNP complex localization	1.20404	0.01716
orf19.2117_1146	ORF19.2117	LEU5	Putative mitochondrial carrier protein; Hap43-repressed; rat catheter biofilm induced	1.20393	0.03171
orf19.729.1_2540	ORF19.729.1	RGD3	Putative Rho GTPase activating protein; fungal-specific (no human or murine homolog)	1.20379	0.03295
orf19.2665_3595	ORF19.2665	MSN5	Predicted karyopherin involved in nuclear import and export of proteins; flow model biofilm induced; Spider biofilm induced	1.20378	0.01631
orf19.2584_562	ORF19.2584	OPT9	Probable pseudogene similar to fragments of OPT1 oligopeptide transporter gene; decreased expression in hyphae compared to yeast-form cells; transcriptionally induced upon phagocytosis by macrophage	1.20343	0.03194
orf19.3573_3256	ORF19.3573	PEX6	Ortholog(s) have ATPase activity, protein heterodimerization activity, role in fatty acid metabolic process, protein import into peroxisome matrix, receptor recycling, replicative cell aging and cytosol, nucleus, peroxisome localization	1.20343	0.0777
orf19.4030_1076	ORF19.4030		Ortholog(s) have DNA primase activity, single-stranded DNA binding activity, role in DNA replication, synthesis of RNA primer, telomere maintenance and alpha DNA polymerase:primase complex localization	1.20338	0.01521
orf19.433_1665	ORF19.433		Ortholog(s) have Rab guanyl-nucleotide exchange factor activity, role in intra-Golgi vesicle-mediated transport, protein complex assembly and TRAPP complex, trans-Golgi network localization	1.20332	0.01012
orf19.1409.3_50	ORF19.1409.3		Protein of unknown function; Spider biofilm induced	1.20331	0.20946
orf19.6115_118	ORF19.6115		Dubious open reading frame	1.20299	0.03433
orf19.5269_1265	ORF19.5269		Ortholog of C. dubliniensis CD36 : Cd36_11210, C. parapsilosis CDC317 : CPAR2_805180, Candida tenuis NRRL Y-1498 : CANTEDRAFT_116279 and Debaryomyces hansenii CBS767 : DEHA2B10714g	1.20289	0.03621
orf19.3845_1465	ORF19.3845	FGR3	Protein lacking an ortholog in S. cerevisiae; transposon mutation affects filamentous growth	1.20278	0.01129
orf19.5445_735	ORF19.5445	GLO3	Putative ARF GTPase activator; role in COPI coating of Golgi vesicle, ER to Golgi vesicle-mediated transport, retrograde Golgi to ER vesicle-mediated transport; Spider biofilm repressed	1.20276	0.01533
orf19.5020_886	ORF19.5020		Protein of unknown function; Hap43-induced; Spider biofilm induced	1.20259	0.14034
orf19.2532_1656	ORF19.2532	PRS	Putative prolyl-tRNA synthetase; monofunctional Class II synthetase; gene is constitutively expressed	1.20254	0.17911
orf19.2382_2862	ORF19.2382		Protein similar to isoleucyl-tRNA synthetase; isoleucyl-tRNA synthetase is the target of drugs including the cyclic beta-amino acid icofungipen/PLD-118/BAY-10-8888 and mupirocin	1.20248	0.06766
orf19.5141_2031	ORF19.5141		Ortholog of Candida albicans WO-1 : CAWG_05647	1.20231	0.08696
orf19.1971_1414	ORF19.1971	TRY3	RING-finger transcription factor; regulator of yeast form adherence; required for yeast cell adherence to silicone substrate; Spider biofilm induced	1.20206	0.05709
orf19.317_862	ORF19.317	PNP1	Purine nucleoside phosphorylase; metabolizes inosine and guanosine nucleosides; in the nicotinamide riboside salvage pathway; Spider biofilm repressed	1.20193	0.1239
orf19.4316_1060	ORF19.4316		Trimethyllysine dioxygenase, the first enzyme in the carnitine biosynthesis pathway; hypha-induced expression, regulated by Cyr1, Ras1, Efg1; rat catheter biofilm repressed	1.20186	0.09071
orf19.2227_1080	ORF19.2227		Protein of unknown function; flow model biofilm induced; nitric oxide-repressed	1.20179	0.09774
orf19.3625_933	ORF19.3625		Has domain(s) with predicted zinc ion binding activity	1.20172	0.04854
orf19.671_711	ORF19.671	PSP1	Protein repressed during the mating process	1.20164	0.28493
orf19.2125_208	ORF19.2125		Protein of unknown function; GlcNAc-induced protein; Spider biofilm induced; rat catheter biofilm repressed	1.2014	0.06238
orf19.6407_1259	ORF19.6407		Ortholog(s) have role in ribosomal large subunit biogenesis and cytoplasm, cytosolic large ribosomal subunit, preribosome, large subunit precursor localization	1.20134	0.01189
orf19.5935_1565	ORF19.5935		Ortholog of C. dubliniensis CD36 : Cd36_84710, C. parapsilosis CDC317 : CPAR2_807470, Candida tenuis NRRL Y-1498 : CANTEDRAFT_136475 and Debaryomyces hansenii CBS767 : DEHA2B08844g	1.2013	0.19674
orf19.2461_923	ORF19.2461	PRN4	Protein with similarity to pirins; induced by benomyl treatment; flow model biofilm repressed	1.20125	0.17978
orf19.6086_1657	ORF19.6086	LEU4	Putative 2-isopropylmalate synthase; regulated by Nrg1, Mig1, Tup1, Gcn4; induced by human whole blood or PMNs; macrophage/pseudohyphal-repressed after 16h; Spider biofilm repressed	1.20109	0.09481
orf19.5368_1432	ORF19.5368		Ortholog of Vms1; component of a Cdc48-complex involved in protein quality control in S. cerevisiae; Spider biofilm repressed	1.20103	0.0168
orf19.7529_1829	ORF19.7529	EPL1	Subunit of the NuA4 histone acetyltransferase complex	1.20099	0.03623
orf19.3429_2853	ORF19.3429	FGR47	Protein lacking an ortholog in S. cerevisiae; transposon mutation affects filamentous growth	1.20094	0.01457
orf19.3753_2598	ORF19.3753	SEF1	Zn2-Cys6 transcription factor; regulates iron uptake; negatively regulated by Sfu1p, positively regulated by Tbf1; promotes virulence in mice; mutants display decreased colonization of mouse kidneys; Spider biofilm induced	1.20089	0.0036
orf19.6900_1228	ORF19.6900		Ortholog(s) have role in establishment or maintenance of cell polarity, mitochondrial genome maintenance, mitochondrion inheritance, phospholipid transport, protein import into mitochondrial outer membrane	1.20066	0.12648
orf19.7552_2202	ORF19.7552		Putative U3-containing small subunit processome complex protein; Hap43-induced gene; repressed in core stress response; Spider biofilm induced	1.20065	0.02794
orf19.7165_528	ORF19.7165	MED9	RNA polymerase II mediator complex subunit; Hap43p-repressed gene	1.20056	0.20202
orf19.6731_274	ORF19.6731		Protein of unknown function; repressed by alpha pheromone in SpiderM medium; Spider biofilm induced	1.20053	0.0056
orf19.5367_2246	ORF19.5367	RDH54	Putative DNA-dependent ATPase with a predicted role in DNA recombination and repair; transcriptionally induced by interaction with macrophages	1.20038	0.08992
orf19.7074_546	ORF19.7074		Ortholog(s) have RNA polymerase II transcription factor recruiting transcription factor activity, methylated histone residue binding activity	1.20035	0.13014
orf19.6747_871	ORF19.6747		Ortholog(s) have acid phosphatase activity, role in dephosphorylation, intracellular sterol transport and cytoplasm, nucleus localization	1.20023	0.01872
orf19.3582_664	ORF19.3582		Ortholog(s) have protein-lysine N-methyltransferase activity, role in peptidyl-lysine dimethylation, vesicle-mediated transport and cytosol, nucleus localization	1.2002	0.03754
orf19.7221_3023	ORF19.7221	SET3	NAD-dependent histone deacetylase; mutations affect filamentous growth; genetic evidence suggests Set3/Hos2 function as a complex to regulate white-opaque switching, morphogenesis, and virulence; flow model biofilm induced	1.20019	0.02438
orf19.3820_1469	ORF19.3820		Protein with DNA binding domain, an endonuclease domain; adjacent to CEN4, the centromere region of Chr 4; clade-associated gene expression	1.20012	0.00116
orf19.3330_737	ORF19.3330	CRL1	Predicted GTPase of RHO family; CAAX motif geranylgeranylated; expression in S. cerevisiae causes dominant-negative inhibition of pheromone response	1.20001	0.04677
orf19.1857_547	ORF19.1857		Putative L-azetidine-2-carboxylic acid acetyltransferase; mutants are viable	1.19999	0.01361
orf19.2108_836	ORF19.2108	SOD6	Copper- and zinc-containing superoxide dismutase; gene family includes SOD1, SOD4, SOD5, and SOD6; gene may contain an intron; Hap43-repressed; flow model and rat catheter biofilm induced	1.19996	0.06532
orf19.2911_2306	ORF19.2911	SEC3	Predicted subunit of the exocyst complex, involved in exocytosis; required for hyphal growth after the first septin ring formation; interacts with septins Cdc3p, Cdc10p, and Cdc11p; localizes to a crescent on the surface of the hyphal tip	1.19991	0.0662
orf19.2917_394	ORF19.2917		Putative GTPase; heterozygous null mutant exhibits resistance to parnafungin in the C. albicans fitness test; Hap43p-induced gene	1.19989	0.04962
orf19.2019_575	ORF19.2019		Ortholog(s) have structural constituent of ribosome activity and mitochondrial large ribosomal subunit localization	1.19986	0.07315
orf19.487_1232	ORF19.487	SPT14	Putative DNA-binding transcription factor; predicted role in regulation of biogenesis of the cell wall; upregulated in biofilm; protein newly produced during adaptation to the serum	1.19969	0.10351
orf19.2662_362	ORF19.2662		Predicted ORF of unknown function; overlaps TLO34/orf19.2661	1.1996	0.00287
orf19.2129_2228	ORF19.2129		Ortholog of S. cerevisiae Spo71; a meiosis-specific protein required for spore wall formation during sporulation in S. cerevisiae; possibly an essential gene, disruptants not obtained by UAU1 method	1.19949	0.13173
orf19.5859_1218	ORF19.5859	DAL8	Putative allantoate permease; fungal-specific (no human or murine homolog)	1.19943	0.0038
orf19.597_735	ORF19.597		Protein with an aspartate aminotransferase domain; Gcn4-regulated	1.19939	0.09131
orf19.5304_277	ORF19.5304		Ortholog of C. dubliniensis CD36 : Cd36_43800 and Candida albicans WO-1 : CAWG_03395	1.19935	0.13271
orf19.6192_255	ORF19.6192		Protein of unknown function; Plc1-regulated; transcript detected in high-resolution tiling arrays	1.19934	0.0199
orf19.5069_388	ORF19.5069		Ortholog of S. cerevisiae Sae3; meiosis specific protein involved in DMC1-dependent meiotic recombination in S. cerevisiae; Spider biofilm induced	1.19924	0.11571
orf19.7077_1618	ORF19.7077		Putative ferric reductase; induced by Mac1 under copper starvation; Plc1-regulated; Rim101-repressed	1.19924	0.02714
orf19.2472.1_120	ORF19.2472.1		Ortholog of C. dubliniensis CD36 : Cd36_61610, C. parapsilosis CDC317 : CPAR2_107530, Candida tenuis NRRL Y-1498 : CANTEDRAFT_115252 and Debaryomyces hansenii CBS767 : DEHA2D02200g	1.19923	0.19019
orf19.2065_968	ORF19.2065		Ortholog(s) have role in allantoin catabolic process and cytosol, nucleus localization	1.19917	0.00791
orf19.1396_1079	ORF19.1396		Ortholog(s) have ARF GTPase activator activity, role in ER to Golgi vesicle-mediated transport, intra-Golgi vesicle-mediated transport and Golgi apparatus, clathrin-coated vesicle localization	1.19904	0.01049
orf19.5811_517	ORF19.5811	MET1	Putative uroporphyrin-3 C-methyltransferase, methionine biosynthesis enzyme; upregulated by human whole blood or polymorphonuclear (PMN) cells; Hog1p-induced; fungal-specific (no human or murine homolog); Hap43p-repressed	1.19904	0.03358
orf19.2520_770	ORF19.2520		Ortholog(s) have structural constituent of ribosome activity and mitochondrial small ribosomal subunit localization	1.19898	0.11777
orf19.1300_1186	ORF19.1300		Putative mitochondrial membrane protein; homozygous transposon insertion causes decreased colony wrinkling under filamentous growth-inducing conditions, but does not block true hyphal formation in liquid media	1.19891	0.14463
orf19.668_860	ORF19.668	TOS4	Putative fork-head transcription factor; rat catheter and Spider biofilm repressed	1.19882	0.05259
orf19.3715_450	ORF19.3715	ASF1	Protein similar to S. cerevisiae Asf1p, a chromatin assembly complex component; likely to be essential for growth, based on an insertional mutagenesis strategy	1.1988	0.09553
orf19.6041_3817	ORF19.6041	RPO41	Putative mitochondrial RNA polymerase; repressed in core stress response; Spider biofilm induced	1.19877	0.04576
orf19.5277_1155	ORF19.5277		Ortholog(s) have role in nuclear-transcribed mRNA catabolic process, 3'-5' exonucleolytic nonsense-mediated decay, protein ubiquitination and cytoplasm, nucleolus, polysome localization	1.19861	0.00567
orf19.6182_1892	ORF19.6182	ZCF34	Zn(II)2Cys6 transcription factor involved in regulation of multidrug resistance via control of CDR1 expression; mutants display decreased colonization of mouse kidneys; required for yeast cell adherence to silicone substrate	1.19849	0.08728
orf19.4573_2353	ORF19.4573	ZCF26	Zn2-Cys6 transcription factor of unknown function; induced by alpha pheromone in SpiderM medium	1.19843	0.02415
orf19.6049_1826	ORF19.6049		Ortholog(s) have protein kinase activator activity, role in protein phosphorylation, regulation of cytokinesis and chromosome passenger complex, kinetochore microtubule, spindle midzone localization	1.19839	0.0277
orf19.3415_1089	ORF19.3415	PTK2	Putative protein kinase of polyamine import; mutation confers hypersensitivity to high concentrations of tunicamycin; YPD flow model biofilm induced; rat catheter and Spider biofilm induced	1.19838	0.16231
orf19.5510_3424	ORF19.5510		Ortholog(s) have role in chromatin silencing at telomere, negative regulation of transcription from RNA polymerase II promoter by pheromones and CHRAC localization	1.19835	0.03024
orf19.646_1063	ORF19.646	GLN1	Putative glutamate synthase; regulated by Tsa1, Tsa1B under H2O2 stress conditions; Spider biofilm induced	1.19822	0.09623
orf19.6239_973	ORF19.6239		Putative serine/threonine protein kinase; possibly an essential gene, disruptants not obtained by UAU1 method	1.19818	0.02633
orf19.809_1029	ORF19.809		Ortholog(s) have role in maturation of LSU-rRNA from tricistronic rRNA transcript (SSU-rRNA, 5.8S rRNA, LSU-rRNA) and nucleolus, preribosome localization	1.19813	0.18092
orf19.4383_602	ORF19.4383		Ortholog(s) have DNA 5'-adenosine monophosphate hydrolase activity, mismatched DNA binding, zinc ion binding activity, role in cellular response to DNA damage stimulus and cytosol, nucleus localization	1.19803	0.0318
orf19.570_2047	ORF19.570	IFF8	Putative GPI-anchored adhesin-like protein; decreased transcription is observed in an azole-resistant strain that overexpresses MDR1	1.19792	0.00356
orf19.3290_344	ORF19.3290		Plasma membrane-localized protein; repressed by nitric oxide; Hap43p-repressed gene	1.19764	0.11903
orf19.5426_2791	ORF19.5426		Putative patatin-like phospholipase; macrophage-regulated gene; fungal-specific (no human or murine homolog)	1.19763	0.02794
orf19.880_2870	ORF19.880		Ortholog(s) have role in cargo loading into COPII-coated vesicle and COPII vesicle coat, cytosol, mating projection tip localization	1.19762	0.25569
orf19.3643_478	ORF19.3643		Protein of unknown function; Hap43-repressed gene	1.1976	0.07484
orf19.5206_1289	ORF19.5206		Putative chaperone protein; role in the assembly of box H/ACA snoRNPs and thus for pre-rRNA processing; Spider biofilm induced	1.19759	0.09951
orf19.5808_1071	ORF19.5808		Ortholog(s) have protein-lysine N-methyltransferase activity, role in negative regulation of G2/M transition of mitotic cell cycle, peptidyl-lysine methylation and cytosol, nucleus localization	1.19755	0.00221
orf19.7130_342	ORF19.7130		Protein of unknown function; Hap43-repressed gene	1.1975	0.07849
orf19.1196_2377	ORF19.1196	PKH3	Ortholog(s) have protein kinase activity and role in MAPK cascade involved in cell wall biogenesis, protein phosphorylation	1.19734	0.06445
orf19.6062_20	ORF19.6062		Putative TIM23 translocase complex subunit; membrane-localized; Hap43-repressed	1.19733	0.25441
orf19.5417_503	ORF19.5417	DOT5	Putative nuclear thiol peroxidase; alkaline downregulated; sumoylation target; Spider and flow model biofilm induced	1.19726	0.03555
orf19.3116_660	ORF19.3116	EXM2	Putative U1 snRNP complex compotent; decreased transcription is observed upon fluphenazine treatment	1.19725	0.01974
orf19.3409_2167	ORF19.3409	SEC12	Putative guanyl-nucleotide exchange factor; induced in high iron; Hap43-repressed	1.19701	0.0481
orf19.7185_1315	ORF19.7185		Ortholog of C. dubliniensis CD36 : Cd36_73630, C. parapsilosis CDC317 : CPAR2_805330, Candida tenuis NRRL Y-1498 : CANTEDRAFT_119330 and Debaryomyces hansenii CBS767 : DEHA2G16544g	1.19688	0.10001
orf19.5465_185	ORF19.5465		Ortholog(s) have first spliceosomal transesterification activity, role in generation of catalytic spliceosome for first transesterification step and U2-type catalytic step 1 spliceosome, mitotic spindle pole body localization	1.19684	0.05207
orf19.2006.1_6	ORF19.2006.1	COX17	Putative copper metallochaperone; Hap43p-repressed gene; rat catheter biofilm induced; Spider biofilm induced	1.19677	0.06976
orf19.964_3066	ORF19.964	SMC4	Ortholog(s) have chromatin binding activity and role in cellular protein localization, mitotic chromosome condensation, tRNA gene clustering	1.19664	0.04275
orf19.5250_430	ORF19.5250		Has domain(s) with predicted cofactor binding activity	1.19659	0.05853
orf19.6800_1510	ORF19.6800	POS5	Protein similar to S. cerevisiae Pos5p, a mitochondrial NADH kinase involved in the oxidative stress response; planktonic growth-induced gene; likely to be essential for growth, based on an insertional mutagenesis strategy	1.19651	0.01784
orf19.7665_231	ORF19.7665		Ortholog(s) have role in mitochondrial respiratory chain complex IV assembly and mitochondrial inner membrane localization	1.19633	0.09826
orf19.4478_2028	ORF19.4478		Ortholog(s) have aspartate-tRNA ligase activity, role in mitochondrial aspartyl-tRNA aminoacylation and mitochondrion localization	1.1963	0.00291
orf19.2985_263	ORF19.2985		Protein of unknown function; Hap43-repressed gene	1.19623	0.00411
orf19.1461_1080	ORF19.1461		S. pombe ortholog SPCC576.01c is a predicted sulfonate dioxygenase; possibly transcriptionally regulated upon hyphal formation; Spider biofilm induced	1.19618	0.10675
orf19.1468_1408	ORF19.1468	CDC55	Ortholog(s) have protein phosphatase type 2A regulator activity, protein serine/threonine phosphatase activity	1.19614	0.00031
orf19.25_896	ORF19.25		Ortholog(s) have tRNA (guanine) methyltransferase activity, role in tRNA methylation and cytoplasm, nucleolus localization	1.19606	0.0021
orf19.6709_687	ORF19.6709		Predicted alpha/beta hydrolase; Spider biofilm induced	1.19602	0.02716
orf19.7235_2620	ORF19.7235		Putative protein of unknown function; mutation confers hypersensitivity to amphotericin B	1.19588	0.00205
orf19.4751.1_52	ORF19.4751.1		Has domain(s) with predicted NADH dehydrogenase (ubiquinone) activity and mitochondrion localization	1.19584	0.31623
orf19.7297_1059	ORF19.7297		Putative cystathionine gamma-synthase; decreased levels in stationary phase cultures; Hog1p-induced; Gcn4p-regulated	1.19582	0.07916
orf19.2168_1143	ORF19.2168		Putative sterol deacetylase; flow model biofilm induced; rat catheter biofilm repressed	1.19572	0.0585
orf19.575_3419	ORF19.575	HYR3	Putative GPI-anchored adhesin-like protein; similar to Hyr1p induced in high iron; clade-specific repeat variation	1.19568	0.0165
orf19.5439_2127	ORF19.5439		Ortholog of C. parapsilosis CDC317 : CPAR2_504010, C. dubliniensis CD36 : Cd36_80270, Lodderomyces elongisporus NRLL YB-4239 : LELG_02294 and Pichia stipitis Pignal : PICST_29581	1.19567	0.02802
orf19.5932_1549	ORF19.5932		Protein of unknown function; Spider biofilm induced	1.1956	0.0484
orf19.2594_826	ORF19.2594		Ortholog(s) have RNA polymerase I activity, role in transcription of nuclear large rRNA transcript from RNA polymerase I promoter and DNA-directed RNA polymerase I complex, cytosol localization	1.1956	0.07405
orf19.2866_1446	ORF19.2866		Has domain(s) with predicted DNA binding activity	1.19558	0.01159
orf19.7357_967	ORF19.7357		Ortholog(s) have role in coenzyme A biosynthetic process and cytosol, nucleus localization	1.19552	0.0989
orf19.3281_1378	ORF19.3281		Ortholog(s) have histone demethylase activity (H3-K36 specific), methylated histone residue binding activity and role in histone demethylation	1.19543	0.029
orf19.3170_2106	ORF19.3170		Ortholog(s) have role in RNA Polymerase I assembly, RNA Polymerase II core complex assembly, RNA Polymerase III assembly, formation of translation preinitiation complex and cytoplasm, cytosolic ribosome localization	1.19536	0.02048
orf19.4056_1092	ORF19.4056	BRG1	Transcription factor; recruits Hda1 to hypha-specific promoters; Tn mutation affects filamentation; Hap43-repressed; Spider and flow model biofilm induced; required for Spider biofilm formation; Bcr1-repressed in RPMI a/a biofilms	1.19529	0.10652
orf19.961.2_103	ORF19.961.2		Ortholog(s) have mitochondrion, nucleus localization	1.19506	0.04019
orf19.5959_2347	ORF19.5959	NOP14	Putative nucleolar protein; Hap43-induced; mutation confers resistance to 5-fluorocytosine (5-FC), 5-fluorouracil (5-FU), and tubercidin (7-deazaadenosine); heterozygous mutant is resistant to parnafungin; Spider biofilm induced	1.19504	0.07246
orf19.4766_2223	ORF19.4766	ARG81	Zn(II)2Cys6 transcription factor; required for utilization of ornithine as a nitrogen source and for wild-type resistance to caffeine; required for yeast cell adherence to silicone substrate	1.19501	0.27302
orf19.5956_553	ORF19.5956	PIN3	Putative SH3-domain-containing protein; predicted role in actin cytoskeleton organization; Spider biofilm repressed	1.19492	0.12041
orf19.1290_1761	ORF19.1290	XKS1	Putative xylulokinase; Hap43-repressed; induced by prostaglandins; rat catheter biofilm repressed	1.19484	0.00916
orf19.7009_896	ORF19.7009		Has domain(s) with predicted catalytic activity, coenzyme binding activity and role in cellular metabolic process	1.19475	0.11919
orf19.933_364	ORF19.933		Ortholog(s) have protein homodimerization activity, ubiquitin-protein ligase activity and role in UV-damage excision repair, free ubiquitin chain polymerization, postreplication repair, protein K63-linked ubiquitination	1.19451	0.1043
orf19.51_3894	ORF19.51		Ortholog(s) have role in mitochondrion organization, translational initiation and eukaryotic translation initiation factor 3 complex localization	1.19448	0.12569
orf19.2026_2015	ORF19.2026	UBP13	Ortholog of S. cerevisiae Ubp13; putative ubiquitin carboxyl-terminal hydrolase; flow model biofilm induced; rat catheter biofilm repressed	1.19441	0.11494
orf19.4340.1_316	ORF19.4340.1		Ortholog(s) have role in mRNA splicing, via spliceosome and U1 snRNP, U2 snRNP, U4/U6 x U5 tri-snRNP complex, U5 snRNP, cytosol localization	1.19431	0.09379
orf19.5397_498	ORF19.5397		Putative conserved oligomeric Golgi complex subunit; decreased transcription is observed upon fluphenazine treatment	1.19413	0.05479
orf19.2115_1168	ORF19.2115		Putative molybdopterin-converting factor; fungal-specific (no human or murine homolog)	1.19411	0.04165
orf19.1591_1093	ORF19.1591	ERG10	Acetyl-CoA acetyltransferase; role in ergosterol biosynthesis; soluble in hyphae; changes in protein abundance associated with azole resistance; fluconazole or ketoconazole induced; macrophage-downregulated protein; GlcNAc-induced protein	1.19397	0.04207
orf19.6506_2007	ORF19.6506		Ortholog(s) have role in histone deacetylation, negative regulation of antisense RNA transcription, regulation of DNA-dependent DNA replication initiation, transcription elongation from RNA polymerase II promoter	1.19396	0.01913
orf19.3199_1800	ORF19.3199	PIKA	Putative phosphatidylinositol kinase; non-sex gene located within the MTLa mating-type-like locus	1.19395	0.30845
orf19.7251_2	ORF19.7251	WSC4	Putative cell wall integrity and stress response subunit 4 precursor; transcription is specific to white cell type	1.1937	0.15304
orf19.1549_498	ORF19.1549		Plasma membrane-associated protein identified in detergent-resistant membrane fraction (possible lipid raft component); repressed by nitric oxide; predicted transmembrane helix	1.19363	0.08282
orf19.6167_823	ORF19.6167	AYR1	Putative oxidoreductase; transcriptionally induced by interaction with macrophage; rat catheter biofilm repressed	1.19362	0.07123
orf19.3693_1661	ORF19.3693	PGA5	Putative GPI-anchored beta-1,3-glucanosyltransferase with similarity to the A. fumigatus GEL family; fungal-specific (no human or murine homolog)	1.19361	0.21457
orf19.271_523	ORF19.271	ADH4	Predicted 3-hydroxyacyl-CoA dehydrogenase; transcript is increased in azole-resistant strain overexpressing MDR1; transcript is increased in populations of cells exposed to fluconazole over multiple generations; mutant is viable	1.19354	0.00103
orf19.3517_708	ORF19.3517		Ortholog(s) have Dsc E3 ubiquitin ligase complex, endoplasmic reticulum, fungal-type vacuole lumen localization	1.19353	0.03629
orf19.2537_122	ORF19.2537		Protein of unknown function; transcript detected on high-resolution tiling arrays	1.19349	0.00754
orf19.6827_771	ORF19.6827	SLU7	Protein similar to S. cerevisiae RNA splicing factor, Slu7; induced by alpha pheromone in SpiderM medium	1.19342	0.02273
orf19.5213.1_223	ORF19.5213.1	COX8	Putative cytochrome c oxidase; flucytosine induced; caspofungin repressed	1.19331	0.08603
orf19.4400_756	ORF19.4400		Has domain(s) with predicted role in anaphase-promoting complex-dependent proteasomal ubiquitin-dependent protein catabolic process, regulation of mitotic metaphase/anaphase transition and anaphase-promoting complex localization	1.19328	0.02719
orf19.4048_1054	ORF19.4048	DES1	Putative delta-4 sphingolipid desaturase; planktonic growth-induced gene	1.1931	0.02442
orf19.6881_575	ORF19.6881	YTH1	Putative mRNA cleavage and polyadenylation specificity factor; transcription is regulated upon yeast-hyphal switch; decreased expression in hyphae compared to yeast-form cells; fluconazole or flucytosine induced	1.19307	0.07783
orf19.7236_732	ORF19.7236	TIF35	Putative translation initiation factor; repressed upon phagocytosis by murine macrophage; Spider biofilm repressed	1.19304	0.13012
orf19.3337_631	ORF19.3337		Protein of unknown function; merged with orf19.3338; rat catheter, flow and Spider model biofilm induced; promoter bound by Bcr1, Efg1, Ndt80, and Rob1; orf19.3338 Bcr1-repressed in RPMI a/a biofilms	1.19298	0.2173
orf19.4051_1329	ORF19.4051	HTS1	Putative tRNA-His synthetase; downregulated upon phagocytosis by murine macrophage; stationary phase enriched protein; Spider biofilm repressed	1.19249	0.04073
orf19.1685_1043	ORF19.1685	ZCF7	Predicted Zn(II)2Cys6 transcription factor; mutant shows reduced colony wrinkling on Spider medium and is unable to utilize mannitol as a carbon source; mutants have increased colonization of mouse kidneys	1.19233	0.16331
orf19.7537_4005	ORF19.7537	BNR1	Formin; probable role in hyphal cytoskeletal polarity; synthetic lethality if Bnr1p and Bni1p are absent	1.19225	0.07679
orf19.6512_1273	ORF19.6512	EXO70	Predicted subunit of the exocyst complex, involved in exocytosis; localizes to a crescent on the surface of the hyphal tip	1.19193	0.33622
orf19.392_202	ORF19.392		Ortholog(s) have role in mitochondrial respiratory chain complex III assembly and integral to mitochondrial membrane localization	1.19171	0.00091
orf19.4492_1207	ORF19.4492		Ortholog(s) have role in nuclear division, rRNA processing and mitotic spindle pole body, nuclear periphery, nucleolus, preribosome, large subunit precursor localization	1.19154	0.0844
orf19.7672_790	ORF19.7672		Ortholog(s) have role in ER-associated ubiquitin-dependent protein catabolic process, endoplasmic reticulum unfolded protein response	1.19152	0.04875
orf19.3656_1357	ORF19.3656	COX15	Cytochrome oxidase assembly protein; transcript regulated by Nrg1 and Tup1; alkaline repressed; Hap43-repressed; early-stage flow model biofilm induced; Spider biofilm repressed	1.19139	0.00382
orf19.4335_1369	ORF19.4335	TNA1	Putative nicotinic acid transporter; detected at germ tube plasma membrane by mass spectrometry; transcript induced upon phagocytosis by macrophage; rat catheter biofilm induced	1.19132	0.05544
orf19.7529_2203	ORF19.7529	EPL1	Subunit of the NuA4 histone acetyltransferase complex	1.19113	0.01995
orf19.3582_483	ORF19.3582		Ortholog(s) have protein-lysine N-methyltransferase activity, role in peptidyl-lysine dimethylation, vesicle-mediated transport and cytosol, nucleus localization	1.19097	0.0406
orf19.4566_353	ORF19.4566		Protein similar to S. cerevisiae Rot1p, which has roles in cytoskeletal dynamics and cell wall biosynthesis; predicted Kex2p substrate	1.19085	0.01237
orf19.593_2180	ORF19.593	FGR32	Protein similar to S. cerevisiae Swa2p; induced upon adherence to polystyrene; transposon mutation affects filamentous growth; Hap43p-repressed gene	1.19081	0.04359
orf19.3161_136	ORF19.3161		Ortholog(s) have ATPase activator activity, RNA binding activity	1.19076	0.00233
orf19.5604_249	ORF19.5604	MDR1	Plasma membrane MDR/MFS multidrug efflux pump; methotrexate is preferred substrate; overexpression in drug-resistant clinical isolates confers fluconazole resistance; repressed in young biofilms; rat catheter biofilm induced	1.19074	0.09972
orf19.4188_2731	ORF19.4188	NMD5	Karyopherin; carrier protein involved in nuclear import of proteins; repressed in core stress response; Hap43-induced; Spider biofilm induced	1.19071	0.01644
orf19.5857_976	ORF19.5857		Ortholog of C. dubliniensis CD36 : Cd36_84070, C. parapsilosis CDC317 : CPAR2_102720, Candida tenuis NRRL Y-1498 : CANTEDRAFT_98617 and Debaryomyces hansenii CBS767 : DEHA2D07392g	1.1906	0.04513
orf19.6947_691	ORF19.6947	GTT11	Glutathione S-transferase, localized to ER; induced in exponentially growing cells, under oxidative stress; induced by nitric oxide; Spider biofilm induced	1.19046	0.01307
orf19.6573_6487	ORF19.6573	BEM2	Putative Rho1p GTPase activating protein (GAP); serum-induced transcript; Spider biofilm induced; flow model biofilm repressed	1.19037	0.00895
orf19.5335_3079	ORF19.5335	SGS1	RecQ-related DNA helicase; Bloom's syndrome-related gene; haploinsufficient for wild-type lifespan; upregulated in farnesol treated biofilm	1.19035	0.05576
orf19.3093_2525	ORF19.3093	MSH2	Putative DNA mismatch repair factor; transcript regulated by Nrg1; flucytosine repressed; transcript regulated by tyrosol and cell density	1.1902	0.06624
orf19.978_2062	ORF19.978	BDF1	Bromodomain transcription factor; repressed upon adherence to polystyrene; reduced mRNA abundance detected in null mutant; macrophage/pseudohyphal-repressed; possibly essential, disruptants not obtained by UAU1 method	1.19017	0.15854
orf19.3704.1_139	ORF19.3704.1		Ortholog(s) have structural constituent of ribosome activity and mitochondrial small ribosomal subunit localization	1.19008	0.10131
orf19.3612_71	ORF19.3612	PST2	Putative NADH:quinone oxidoreductase; similar to 1,4-benzoquinone reductase; immunogenic in mice; induced by benomyl, oxidative stress via Cap1; fungal-specific; farnesol-repressed; Spider biofilm induced	1.19006	0.18998
orf19.4299_953	ORF19.4299	MSW1	Protein similar to S. cerevisiae Msw1p, which is mitochondrial tryptophanyl-tRNA synthetase; Hap43p-repressed gene; likely to be essential for growth, based on an insertional mutagenesis strategy	1.1899	0.11833
orf19.2422_977	ORF19.2422	ARC1	Putative G4 nucleic acid binding protein; macrophage/pseudohyphal-repressed; protein enriched in stationary phase yeast-form cultures; Spider biofilm repressed	1.18986	0.04819
orf19.7548_63	ORF19.7548	MED21	Ortholog(s) have RNA polymerase II repressing transcription factor binding, RNA polymerase II transcription coactivator activity, RNA polymerase II transcription corepressor activity	1.18968	0.0434
orf19.5825_307	ORF19.5825	NCB2	Beta subunit of NC2, heterodimeric regulator of transcription; activates CDR1 transcription; possibly an essential gene, disruptants not obtained by UAU1 method; conditional mutants show decreased susceptibility to azoles	1.18954	0.01559
orf19.7516_2723	ORF19.7516		Putative glycoside hydrolase; Hap43-induced gene	1.18953	0.16542
orf19.5290_1215	ORF19.5290		Protein of unknown function; repressed by Sfu1; Hap43-induced gene	1.1894	0.27969
orf19.2215_1444	ORF19.2215	GLE1	Putative nucleoporin; moderately induced at 42 degrees C	1.1894	0.04816
orf19.6800_1441	ORF19.6800	POS5	Protein similar to S. cerevisiae Pos5p, a mitochondrial NADH kinase involved in the oxidative stress response; planktonic growth-induced gene; likely to be essential for growth, based on an insertional mutagenesis strategy	1.18933	0.03044
orf19.4368_1920	ORF19.4368		Has domain(s) with predicted hydrolase activity and role in cellular process	1.18928	0.13954
orf19.1953_733	ORF19.1953		Predicted protein of unknown function; merged with orf19.1952 in Assembly 21	1.18927	0.03827
orf19.5959_2470	ORF19.5959	NOP14	Putative nucleolar protein; Hap43-induced; mutation confers resistance to 5-fluorocytosine (5-FC), 5-fluorouracil (5-FU), and tubercidin (7-deazaadenosine); heterozygous mutant is resistant to parnafungin; Spider biofilm induced	1.1892	0.01712
orf19.2515_2541	ORF19.2515		ZZ-type zinc finger protein; rat catheter and Spider biofilm induced	1.18911	0.72841
orf19.2284_734	ORF19.2284		Protein with an FMN-binding domain; Hap43-repressed; flow model biofilm induced	1.18909	0.14253
orf19.7631_652	ORF19.7631	SLD5	Putative GINS complex subunit; cell-cycle regulated periodic mRNA expression	1.18907	0.03717
orf19.1369_1171	ORF19.1369		Protein with predicted peptidase domains; Hap43-repressed gene	1.18899	0.15895
orf19.2604_1186	ORF19.2604		S. pombe ortholog SPAC2C4.06c is a predicted tRNA (cytosine-5-)-methyltransferase; Spider biofilm induced	1.18898	0.05721
orf19.1404_1229	ORF19.1404		Predicted tRNA dihydrouridine synthase; Spider biofilm induced	1.18896	0.00202
orf19.2821_34	ORF19.2821		Protein of unknown function; Hap43-repressed gene; repressed by nitric oxide	1.18893	0.02561
orf19.3535_215	ORF19.3535		Ortholog(s) have cellular bud neck, fungal-type vacuole localization	1.18891	0.00619
orf19.3200_238	ORF19.3200	MTLA2	Master regulator (activator) of a-type mating; has HMG domain, which is predicted to bind DNA; gene has intron; not related to S. cerevisiae MATa2; a/alpha mating type may increase virulence, provides competitive advantage	1.1883	0.0055
orf19.4135_1259	ORF19.4135	PRC2	Putative carboxypeptidase; induced by human neutrophils; Spider biofilm induced	1.18826	0.50445
orf19.6668_451	ORF19.6668		Ortholog(s) have ubiquitin-protein ligase activator activity and role in ER-associated ubiquitin-dependent protein catabolic process, establishment of protein localization to endoplasmic reticulum membrane	1.18822	0.06864
orf19.6552_406	ORF19.6552		Flavin-linked sulfhydryl oxidase; predicted localization to endoplasmic reticulum lumen; involved in disulfide bond formation within the ER; Spider biofilm induced	1.1882	0.07212
orf19.3015_1608	ORF19.3015	ARX1	Putative ribosomal large subunit biogenesis protein; repressed in core stress response; repressed by prostaglandins	1.18819	0.05437
orf19.4658_2165	ORF19.4658		RING finger and CHY zinc finger domain-containing protein; mutant are viable	1.18817	0.04326
orf19.1066_679	ORF19.1066	GIG1	Protein induced by N-acetylglucosamine (GlcNAc); localized in cytoplasm; mutation causes increased resistance to nikkomycin Z	1.18812	0.25371
orf19.4570_294	ORF19.4570		Ortholog of C. dubliniensis CD36 : Cd36_42090, Debaryomyces hansenii CBS767 : DEHA2C14872g, Pichia stipitis Pignal : PICST_74821 and Spathaspora passalidarum NRRL Y-27907 : SPAPADRAFT_58607	1.18811	0.04801
orf19.332_1154	ORF19.332		Member of a complex that contains Prp19; stabilizes U6 snRNA in catalytic forms of the spliceosome containing U2, U5, and U6 snRNAs; Spider biofilm induced	1.1881	0.13607
orf19.529_1059	ORF19.529		Ortholog of C. dubliniensis CD36 : Cd36_29750, C. parapsilosis CDC317 : CPAR2_205260, Candida tenuis NRRL Y-1498 : CANTEDRAFT_91782 and Debaryomyces hansenii CBS767 : DEHA2F19294g	1.18808	0.10477
orf19.2570_318	ORF19.2570	MCI4	Putative NADH-ubiquinone dehydrogenase; Hap43p-repressed gene	1.18808	0.12583
orf19.2476_4996	ORF19.2476		Ortholog(s) have histone demethylase activity (H3-trimethyl-K4 specific) activity	1.18789	0.03318
orf19.4177_906	ORF19.4177	HIS5	Putative histidinol-phosphate aminotransferase; Gcn4p-regulated; protein present in exponential and stationary growth phase yeast cultures	1.18782	0.00589
orf19.3431_3591	ORF19.3431		Ortholog(s) have 3'-5' exonuclease activity, DNA-directed DNA polymerase activity, role in mitochondrial DNA replication and mitochondrion localization	1.18775	0.06181
orf19.5824_912	ORF19.5824		Protein of unknown function; rat catheter and Spider biofilm induced	1.18767	0.00733
orf19.867_1336	ORF19.867		Ortholog(s) have superoxide-generating NADPH oxidase activity, role in apoptotic process, regulation of actin cytoskeleton organization and perinuclear endoplasmic reticulum, ribosome localization	1.18739	0.02999
orf19.6580_593	ORF19.6580		Protein of unknown function; Spider biofilm induced	1.1873	0.04431
orf19.672_1494	ORF19.672		Ortholog(s) have U5 snRNP localization	1.18726	0.13773
orf19.6232_2374	ORF19.6232	NPR1	Predicted serine/threonine protein kinase, involved in regulation of ammonium transport; induced in core stress response; Hap43p-repressed gene	1.18721	0.10282
orf19.2127_1030	ORF19.2127	CST5	Scaffold protein for the mitogen-activated protein (MAP) kinase cascade that regulates mating; required for opaque mating or white biofilm formation in response to mating pheromone; induced in response to pheromone; Hap43p-repressed	1.18709	0.02162
orf19.5956_476	ORF19.5956	PIN3	Putative SH3-domain-containing protein; predicted role in actin cytoskeleton organization; Spider biofilm repressed	1.18709	0.05978
orf19.5925_1028	ORF19.5925		Ortholog of S. cerevisiae : AIM6, C. glabrata CBS138 : CAGL0C05533g, C. dubliniensis CD36 : Cd36_84610, C. parapsilosis CDC317 : CPAR2_404550 and Candida tenuis NRRL Y-1498 : CANTEDRAFT_115337	1.18702	0.04979
orf19.415_248	ORF19.415		Putative protein of unknown function; Hap43p-repressed gene	1.18693	0.03048
orf19.3087.1_149	ORF19.3087.1		Ortholog of C. dubliniensis CD36 : Cd36_54140 and Candida albicans WO-1 : CAWG_04820	1.18692	0.04369
orf19.2734_932	ORF19.2734		Protein with a glucose/ribitol dehydrogenase family domain; mutants are viable	1.18687	0.01156
orf19.4450_1592	ORF19.4450	ZCF23	Predicted Zn(II)2Cys6 transcription factor; ortholog of S. cerevisiae Gsm1; flow model biofilm induced	1.18686	0.05015
orf19.6716_1365	ORF19.6716	ABD1	SAM-dependent RNA methyltransferase; methylates mRNA 5' cap; binds phosphorylated RNA Pol II C-term domain peptide; does not bind mRNA TPase and mRNA GTase (Cet1,Cgt1); functional homolog of S. cerevisiae Abd1; rat catheter biofilm induced	1.18682	0.02557
orf19.5269_1149	ORF19.5269		Ortholog of C. dubliniensis CD36 : Cd36_11210, C. parapsilosis CDC317 : CPAR2_805180, Candida tenuis NRRL Y-1498 : CANTEDRAFT_116279 and Debaryomyces hansenii CBS767 : DEHA2B10714g	1.18674	0.05431
orf19.1939_952	ORF19.1939		Ortholog of S. cerevisiae : YDR374C, C. glabrata CBS138 : CAGL0A02970g, C. dubliniensis CD36 : Cd36_51030, C. parapsilosis CDC317 : CPAR2_303320 and Candida tenuis NRRL Y-1498 : CANTEDRAFT_106457	1.18669	0.00545
orf19.7282_869	ORF19.7282	PEX13	Protein required for peroxisomal protein import mediated by PTS1 and PTS2 targeting sequences; transcript induced in an RHE model of oral candidiasis; Hap43-repressed gene	1.18658	0.59598
orf19.6734_2141	ORF19.6734	TCC1	Putative transcription factor/corepressor; regulation of filamentation and virulence; interacts with Tup1; regulates hypha-specific gene expression; contains 4 tetratricopeptide repeat (TPR) motifs; flucytosine repressed; Tbp1-induced	1.18658	0.13464
orf19.5212_732	ORF19.5212		Ortholog(s) have SUMO ligase activity, role in protein sumoylation, reciprocal meiotic recombination, synaptonemal complex assembly and condensed nuclear chromosome localization	1.18654	0.27102
orf19.1342_1415	ORF19.1342	SHM1	Mitochondrial serine hydroxymethyltransferase; complements the glycine auxotrophy of an S. cerevisiae shm1 null shm2 null gly1-1 triple mutant; protein present in exponential and stationary growth phase yeast cultures	1.18643	0.00307
orf19.7186_882	ORF19.7186	CLB4	B-type mitotic cyclin; nonessential; negative regulator of pseudohyphal growth; dispensible for mitotic exit, cytokinesis; Fkh2-represed; flow model biofilm repressed; farnesol-upregulated in biofilm; reduced total RNA in clb4 mutant	1.18638	0.02101
orf19.5676_1429	ORF19.5676		Ortholog(s) have cytosol, nucleus localization	1.18634	0.0295
orf19.2504_3357	ORF19.2504	BMS1	Putative GTPase; Hap43-induced gene; mutation confers resistance to 5-fluorocytosine (5-FC); flucytosine induced; repressed by prostaglandins; Spider biofilm induced	1.18627	0.06569
orf19.2655_1063	ORF19.2655	BUB3	Protein similar to S. cerevisiae Bub3; a kinetochore checkpoint component; induced by hydroxyurea treatment; flow model biofilm induced; Spider biofilm induced	1.18607	0.1485
orf19.5684_255	ORF19.5684		Ortholog(s) have structural constituent of ribosome activity and mitochondrial large ribosomal subunit localization	1.18604	0.0512
orf19.881_577	ORF19.881	DFG16	Rim101 pathway protein that acts in Rim101 processing; regulates filamentation in response to alkaline pH; required for host tissue invasion during infection; flow model biofilm induced	1.186	0.48745
orf19.4584_1202	ORF19.4584	PHO114	Acid phosphatase; induced by Mnl1 under weak acid stress; Spider biofilm induced	1.18599	0.07731
orf19.1281_437	ORF19.1281		Putative splicing factor required for the first step of pre-mRNA splicing; Spider biofilm induced	1.18595	0.01783
orf19.1606_694	ORF19.1606		Protein of unknown function; Plc1-regulated	1.18593	0.00999
orf19.1606_323	ORF19.1606		Protein of unknown function; Plc1-regulated	1.18592	0.09934
orf19.3778_1501	ORF19.3778		Protein with a predicted role in ribosome biogenesis; mutation confers hypersensitivity to 5-fluorocytosine (5-FC), 5-fluorouracil (5-FU); repressed in core stress response; repressed by prostaglandins; Hap43-induced	1.18535	0.07971
orf19.4000_1834	ORF19.4000	GRF10	Putative homeodomain transcription factor; null mutant is an adenine auxotroph; Spider biofilm induced; promoter bound by Bcr1, Tec1, Efg1, Ndt80 and Brg1	1.18527	0.07135
orf19.3311_790	ORF19.3311	IFD3	Putative aldo/keto reductase; Mig1-regulated	1.18513	0.05333
orf19.4396_1640	ORF19.4396		Mitochondrial inner membrane protein; mammalian mitofilin domain; Spider biofilm repressed	1.1851	0.02755
orf19.5804_2692	ORF19.5804	HYU1	Putative hydantoin utilization protein A; induced upon adherence to polystyrene; regulated by Gcn2p and Gcn4p	1.18507	0.14963
orf19.549_465	ORF19.549		Ortholog(s) have structural constituent of ribosome activity and mitochondrial inner membrane, mitochondrial large ribosomal subunit localization	1.18504	0.17095
orf19.1178_503	ORF19.1178		Putative transcription factor with bZIP DNA-binding motif; Hap43p-repressed gene	1.18502	0.00026
orf19.57_358	ORF19.57	PSF2	Ortholog(s) have role in DNA-dependent DNA replication, cellular protein localization, double-strand break repair via break-induced replication, meiotic chromosome segregation	1.18487	0.05185
orf19.3093_2390	ORF19.3093	MSH2	Putative DNA mismatch repair factor; transcript regulated by Nrg1; flucytosine repressed; transcript regulated by tyrosol and cell density	1.18466	0.12782
orf19.3676_879	ORF19.3676	ABP140	Ortholog of S. cerevisiae actin-binding protein Abp140; Hap43-induced; F-12/CO2 early biofilm induced	1.18461	0.01317
orf19.2107_1059	ORF19.2107	MUQ1	Putative choline phosphate cytidylyltransferase/phosphoethanolamine cytidylyltransferase; repressed in hyphae compared vs yeast; Hap43-repressed; flow model biofilm induced; Spider biofilm repressed	1.1846	0.01933
orf19.5095_3879	ORF19.5095		Putative oxysterol-binding protein; caspofungin induced; possibly an essential gene, disruptants not obtained by UAU1 method	1.18457	0.13492
orf19.3476_1207	ORF19.3476	HRR25	Predicted protein serine/threonine kinase; Spider biofilm induced	1.18452	0.02626
orf19.5237_529	ORF19.5237	VPH2	Ortholog(s) have role in vacuolar acidification, vacuolar proton-transporting V-type ATPase complex assembly and endoplasmic reticulum membrane localization	1.18445	0.25828
orf19.5943.1_463	ORF19.5943.1		Protein of unknown function; transcript upregulated in an RHE model of oral candidiasis; rat catheter and Spider biofilm repressed	1.18442	0.07856
orf19.362_67	ORF19.362	TLO9	Member of a family of telomere-proximal genes of unknown function; Hap43p-repressed gene	1.18435	0.02404
orf19.6099_1191	ORF19.6099	CCT8	Chaperonin-containing T-complex subunit; role in hyphal morphogenesis, particularly starvation-induced; essential; expression in S. cerevisiae inhibits Ras2-mediated pathways; CCT8 and TRP1 overlap; Spider biofilm repressed	1.18424	0.00713
orf19.3724_504	ORF19.3724		Ortholog(s) have role in endonucleolytic cleavage in 5'-ETS of tricistronic rRNA transcript (SSU-rRNA, 5.8S rRNA and LSU-rRNA), more	1.18421	0.02229
orf19.742_1273	ORF19.742	ALD6	Putative aldehyde dehydrogenase; stationary phase enriched protein; expression regulated upon white-opaque switch; rat catheter biofilm induced; rat catheter and Spider biofilm induced	1.18415	0.0826
orf19.4721_1272	ORF19.4721		Ortholog(s) have RNA binding activity, role in cytoplasmic translation, mRNA processing and mitochondrion localization	1.18407	0.00019
orf19.6448_2055	ORF19.6448		Protein of unknown function; Spider biofilm repressed	1.18406	0.06139
orf19.7127_167	ORF19.7127	TLO16	Member of a family of telomere-proximal genes of unknown function; may be spliced in vivo	1.18404	0.03441
orf19.6306_1417	ORF19.6306		Trimethylaminobutyraldehyde dehydrogenase, the third enzyme of the carnitine biosynthesis pathway	1.18399	0.02916
orf19.999_2660	ORF19.999	GCA2	Predicted extracellular glucoamylase; induced by ketoconazole; possibly essential, disruptants not obtained by UAU1 method; promotes biofilm matrix formation; Spider biofilm induced; Bcr1-induced in RPMI a/a biofilms	1.18376	0.11708
orf19.676_693	ORF19.676		Microtubule-binding protein of the cortical microtubule; delays exit from mitosis when the spindle is abnormally oriented; Spider biofilm repressed	1.18365	0.21418
orf19.3546_1204	ORF19.3546	PEX2	Ortholog(s) have ubiquitin-protein ligase activity, role in fatty acid metabolic process, protein import into peroxisome matrix and peroxisomal membrane localization	1.18364	0.06833
orf19.2884_3124	ORF19.2884	CDC68	Functional homolog of S. cerevisiae Cdc68, a transcription elongation factor; essential; possible drug target	1.18361	0.09274
orf19.6469_2455	ORF19.6469		Predicted ORF in retrotransposon Tca11 with similarity to the Gag-Pol region of retrotransposons, which encodes nucleocapsid-like protein, reverse transcriptase, protease, and integrase	1.18344	0.10855
orf19.3820_1368	ORF19.3820		Protein with DNA binding domain, an endonuclease domain; adjacent to CEN4, the centromere region of Chr 4; clade-associated gene expression	1.18337	0.06153
orf19.5498_1990	ORF19.5498	EFH1	APSES transcription factor; homodimer; minor role in transcriptional regulation vs Efg1; regulates filamentous growth, phenotypic switch; EFG1 and EFH1 genetically interact; expression interferes with mouse intestinal tract colonization	1.18324	0.00294
orf19.5515_851	ORF19.5515		Ortholog(s) have ribosome binding activity, role in mitochondrial respiratory chain complex III assembly, positive regulation of mitochondrial translation and integral to mitochondrial membrane, mitochondrial ribosome localization	1.18312	0.03441
orf19.2341_363	ORF19.2341	HNT1	Protein with similarity to protein kinase C inhibitor-I; protein level decreases in stationary phase cultures	1.18301	0.25597
orf19.1406_520	ORF19.1406		Ortholog(s) have DNA-directed DNA polymerase activity, role in error-free translesion synthesis, error-prone translesion synthesis and mitochondrion, nuclear chromatin, zeta DNA polymerase complex localization	1.18298	0.02065
orf19.1666_1173	ORF19.1666		Ortholog of Dig2, a MAP kinase-responsive inhibitor of Ste12; regulates mating-specific genes and invasive growth in S. cerevisiae; induced by alpha pheromone in SpiderM medium	1.18293	0.00587
orf19.6900_1109	ORF19.6900		Ortholog(s) have role in establishment or maintenance of cell polarity, mitochondrial genome maintenance, mitochondrion inheritance, phospholipid transport, protein import into mitochondrial outer membrane	1.18292	0.01923
orf19.612_672	ORF19.612		Ortholog of S. cerevisiae : AIM32, C. glabrata CBS138 : CAGL0L01529g, C. dubliniensis CD36 : Cd36_33550, C. parapsilosis CDC317 : CPAR2_702070 and Candida tenuis NRRL Y-1498 : CANTEDRAFT_114174	1.1829	0.04508
orf19.7111_192	ORF19.7111		Putative mitochondrial outer membrane protein membrane fission effector; possibly an essential gene, disruptants not obtained by UAU1 method	1.18289	0.08996
orf19.6522_748	ORF19.6522		Putative allantoate permease; Gcn4-regulated; Spider biofilm induced	1.18284	0.29008
orf19.6565_961	ORF19.6565		Conserved mitochondrial inner membrane insertase; mediates insertion of mitochondrial- and nuclear-encoded proteins from the matrix into the inner membrane; Spider biofilm repressed	1.18281	0.01662
orf19.2262_1059	ORF19.2262		Protein similar to quinone oxidoreductases; induced by benomyl treatment, nitric oxide; oxidative stress-induced via Cap1; stationary-phase enriched protein; Spider biofilm induced	1.18275	0.09756
orf19.4457_4126	ORF19.4457	BNI4	Protein required for wild-type cell wall chitin distribution, morphology, hyphal growth; not essential; similar to S. cerevisiae Bni4p (targeting subunit for Glc7p phosphatase, involved in bud-neck localization of chitin synthase III)	1.18271	0.14359
orf19.6191_76	ORF19.6191	TLO8	Member of a family of telomere-proximal genes of unknown function; may be spliced in vivo	1.18267	0.0336
orf19.6828_379	ORF19.6828		Ortholog(s) have role in rRNA processing and nucleolus, preribosome, large subunit precursor localization	1.18262	0.05578
orf19.3521_670	ORF19.3521	ARH2	Putative adrenodoxin-NADPH oxidoreductase; role in heme biosynthesis	1.18261	0.02031
orf19.5607_803	ORF19.5607		Ortholog of C. dubliniensis CD36 : Cd36_63860, C. parapsilosis CDC317 : CPAR2_601140, Candida tenuis NRRL Y-1498 : CANTEDRAFT_92714 and Debaryomyces hansenii CBS767 : DEHA2A06072g	1.18249	0.00441
orf19.4439_312	ORF19.4439		Ortholog of Candida albicans WO-1 : CAWG_00687	1.18242	0.06715
orf19.2313_1063	ORF19.2313		Putative ortholog of S. cerevisiae Pex32 a peroxisomal integral membrane protein with a role in negative regulation of peroxisome size; Hap43-repressed gene	1.18236	0.00616
orf19.6041_3720	ORF19.6041	RPO41	Putative mitochondrial RNA polymerase; repressed in core stress response; Spider biofilm induced	1.1823	0.03662
orf19.2605_1945	ORF19.2605	PRK1	Putative protein serine/threonine kinase; mutants sensitive to growth on hydrogen peroxide medium	1.18227	0.00679
orf19.4097_2386	ORF19.4097		Ortholog of C. dubliniensis CD36 : Cd36_23480, C. parapsilosis CDC317 : CPAR2_407050, Candida tenuis NRRL Y-1498 : CANTEDRAFT_116822 and Debaryomyces hansenii CBS767 : DEHA2B02046g	1.18222	0.13048
orf19.6769_1997	ORF19.6769		Ortholog(s) have cytoplasm localization	1.18221	0.01034
orf19.2410_2144	ORF19.2410	SYS3	Protein similar to S. cerevisiae Sys3p; putative role in endosome-Golgi vesicle docking; upregulated in biofilm; induced upon adherence to polystyrene	1.18211	0.06756
orf19.802_1189	ORF19.802	UGA1	Putative GABA transaminase; transcription regulated by Mig1 and Tup1; stationary phase enriched protein; rat catheter and Spider biofilm induced	1.18211	0.50614
orf19.7428_951	ORF19.7428	APN1	Ortholog of S. cerevisiae Apn1; an AP endonuclease; transcript induced by interaction with macrophages; fungal-specific (no human or murine homolog)	1.18205	0.0427
orf19.4878_2380	ORF19.4878		Protein of unknown function; Hap43-repressed; rat catheter biofilm repressed	1.18194	0.16843
orf19.7080_949	ORF19.7080	LEU2	Isopropyl malate dehydrogenase; leucine biosynthesis; induced by human whole blood or PMNs; protein level decreases in stationary phase; GlcNAc-induced protein; flow model biofilm repressed	1.1819	0.02692
orf19.5484_1051	ORF19.5484	SER1	Putative 3-phosphoserine aminotransferase; predicted role in serine and glycine biosynthesis; protein present in exponential and stationary yeast growth phases; Spider biofilm repressed	1.18182	0.05192
orf19.6638_942	ORF19.6638	PTC4	Type PP2C serine/threonine phosphatase; localized to mitochondria; mutation causes sensitivity to sodium, potassium and azole drugs; decreased expression in hyphae compared to yeast-form cells	1.18156	0.06625
orf19.5248_451	ORF19.5248	MSO1	Putative secretory protein involved in S. cerevisiae sporulation; repressed during pseudohyphal growth in the presence of lysed macrophages; Hap43-repressed; Spider biofilm induced	1.1815	0.004
orf19.4092_403	ORF19.4092		Trimeric GatFAB AmidoTransferase(AdT) complex subunit; involved in the formation of Q-tRNAQ; repressed by fluphenazine treatment or in an azole-resistant strain that overexpresses CDR1; Spider biofilm induced	1.18148	0.00801
orf19.4779_472	ORF19.4779		Putative transporter; slightly similar to the Sit1p siderophore transporter; Gcn4p-regulated; fungal-specific; induced by Mnl1p under weak acid stress	1.18147	0.44655
orf19.7422_466	ORF19.7422		Ortholog(s) have RNA binding activity and nucleus localization	1.18131	0.04387
orf19.5177_1280	ORF19.5177		Ortholog of Candida albicans WO-1 : CAWG_05627	1.18126	0.04772
orf19.11_637	ORF19.11		Protein of unknown function; transcript regulated by Mig1 and Tup1; rat catheter biofilm induced	1.18094	0.13149
orf19.2564_742	ORF19.2564		Putative nucleolar protein; implicated in ribosome biogenesis; rat catheter biofilm repressed	1.18089	0.14657
orf19.3851_888	ORF19.3851		Protein of unknown function; induced by alpha pheromone in SpiderM medium	1.18082	0.15677
orf19.4874_1285	ORF19.4874	MNN23	Alpha-1,2-mannosyltransferase; mutants hypersensitive to toxic ergosterol analog, amphotericin B, calcofluor white, growth at 42 degrees and have decreased cell wall mannan; flow model biofilm induced	1.18079	0.02861
orf19.1643_616	ORF19.1643		Ortholog(s) have serine-type endopeptidase activity, role in regulation of mitochondrion organization, signal peptide processing and mitochondrial inner membrane localization	1.18073	0.01721
orf19.6818_4049	ORF19.6818		Ortholog(s) have cytosol, mitochondrion localization	1.18062	0.04296
orf19.4176_580	ORF19.4176		Ortholog(s) have structural constituent of ribosome activity and mitochondrial small ribosomal subunit localization	1.1806	0.02659
orf19.1067_694	ORF19.1067	GPM2	Putative phosphoglycerate mutase; repressed in hyphae; macrophage/pseudohyphal-repressed; induced by high levels of peroxide stress, farnesol; flow model biofilm induced; rat catheter and Spider biofilm repressed	1.18057	0.0782
orf19.3539_859	ORF19.3539		Predicted nucleolar S-adenosylmethionine-dependent rRNA methyltransferase; Spider biofilm induced	1.18043	0.01745
orf19.5097_2977	ORF19.5097	CAT8	Zn(II)2Cys6 transcription factor; similar to S. cerevisiae Cat8 but mutant phenotype suggests different target genes; mutant displays increased filamentous/invasive growth; flucytosine repressed; rat catheter biofilm induced	1.18038	0.10022
orf19.1941_1003	ORF19.1941	NUF2	Kinetochore component; amount of Nuf2p and Mtw1p protein detected at each centromere is consistent with a single kinetochore microtubule attachment site	1.17991	0.05269
orf19.4823_1092	ORF19.4823	LIP6	Secreted lipase, member of family of lipase genes expressed differentially in response to carbon source and during infection; may have a role in nutrition and/or in creating an acidic microenvironment; induced on adherence to polystyrene	1.17988	0.0471
orf19.1678_279	ORF19.1678		Protein of unknown function; transcript detected on high-resolution tiling arrays	1.17987	0.27628
orf19.2399_1662	ORF19.2399		Putative transcription factor with zinc finger DNA-binding motif; similar to bacterial DnaJ; induced in low iron	1.17986	0.12111
orf19.6039_890	ORF19.6039		Ortholog(s) have SNAP receptor activity and role in ER to Golgi vesicle-mediated transport, Golgi organization, intra-Golgi vesicle-mediated transport, vesicle fusion with Golgi apparatus	1.17978	0.0673
orf19.2154_1333	ORF19.2154	HXK1	N-acetylglucosamine (GlcNAc) kinase; involved in GlcNAc utilization; required for wild-type hyphal growth and mouse virulence; GlcNAc-induced transcript; induced by alpha pheromone in SpiderM medium	1.17964	0.02718
orf19.4306_742	ORF19.4306		Ortholog(s) have methylthioribulose 1-phosphate dehydratase activity, role in L-methionine salvage from methylthioadenosine and cytoplasm localization	1.17942	0.03998
orf19.4208_1631	ORF19.4208	RAD52	Required for homologous DNA recombination, repair of UV- or MMS-damaged DNA, telomere length, UV-induced LOH; constitutive expression, MMS-induced; weakly complements S. cerevisiae rad52 mutant; slow growth, increased white-to-opaque switch	1.17934	0.00822
orf19.7588_708	ORF19.7588		Ortholog(s) have mitochondrion localization	1.17902	0.06856
orf19.4592_1576	ORF19.4592	HSX11	UDP-glucose:ceramide glucosyltransferase (glucosylceramide synthase [GCS], EC 2.4.1.80); involved in glucosylceramide biosynthesis, which is important for virulence	1.17891	0.0227
orf19.2809_2357	ORF19.2809	CTN3	Peroxisomal carnitine acetyl transferase; no obvious metabolic, hyphal, virulence defects in Ura+ strain; induced by macrophage engulfment, hyphal growth, starvation, nonfermentable carbon sources; rat catheter, Spider biofilm induced	1.17882	0.15763
orf19.3631_1117	ORF19.3631	STN1	Protein involved in telomere maintenance; forms a complex with Ten1p	1.17869	0.15769
orf19.2098_848	ORF19.2098	ARO8	Aromatic transaminase of the Ehrlich fusel oil pathway of aromatic alcohol biosynthesis; Rim101 independent alkaline induction; protein abundance affected by URA3 expression in CAI-4 strain; Gcn4-regulated; stationary phase enriched	1.17862	0.01481
orf19.2422_1046	ORF19.2422	ARC1	Putative G4 nucleic acid binding protein; macrophage/pseudohyphal-repressed; protein enriched in stationary phase yeast-form cultures; Spider biofilm repressed	1.17861	0.08304
orf19.6555_213	ORF19.6555		Ortholog(s) have zinc ion binding activity, role in protein import into mitochondrial intermembrane space and cytosol, mitochondrial intermembrane space, nucleus localization	1.1785	0.1078
orf19.5921_1033	ORF19.5921		Ortholog(s) have glyoxysome localization	1.17848	0.04069
orf19.1888_871	ORF19.1888		Putative nicotinamide riboside hydrolase; cleaves N-glycosidic bonds in nucleosides; pyrimidine salvage and nicotinamide riboside salvage pathways; Spider biofilm induced	1.17845	0.02588
orf19.2391_780	ORF19.2391		Putative protein of unknown function; Hap43p-repressed gene; S. cerevisiae ortholog YKR023W localizes to mitochondria	1.17834	0.06492
orf19.7267_22	ORF19.7267	SAM35	Predicted component of the sorting and assembly machinery (SAM complex) of the mitochondrial outer membrane, involved in protein import into mitochondria	1.17834	0.02575
orf19.3287_1079	ORF19.3287	BUD22	Protein with a predicted role in 18S rRNA maturation and small ribosomal subunit biogenesis; repressed in core stress response; repressed by prostaglandins	1.17828	0.00878
orf19.2185_1057	ORF19.2185	NSA1	Putative 66S pre-ribosomal particles conmponent; Hap43-induced; repressed by prostaglandins	1.17821	0.1191
orf19.7343_1304	ORF19.7343		Ortholog(s) have role in mRNA splicing, via spliceosome and U4/U6 x U5 tri-snRNP complex localization	1.17808	0.06878
orf19.454_1787	ORF19.454	SFL1	Transcription factor involved in negative regulation of morphogenesis, flocculation and virulence; induced in core caspofungin response; Spider biofilm induced	1.17763	0.09282
orf19.6173_718	ORF19.6173	STD1	Putative transcription factor; involved in control of glucose-regulated gene expression; repressed by Rgt1; Spider biofilm induced	1.1776	0.15923
orf19.792_659	ORF19.792		Ortholog(s) have protein serine/threonine kinase activity, role in activation of bipolar cell growth, protein phosphorylation, regulation of cytokinesis, regulation of mitotic sister chromatid segregation and cytosol, nucleus localization	1.17756	0.30834
orf19.96_1595	ORF19.96	TOP1	DNA topoisomerase I; required for wild-type growth and for wild-type mouse virulence; sensitive to camptothecin; induced upon adherence to polystyrene; rat catheter biofilm induced	1.17749	0.02467
orf19.7175_937	ORF19.7175	HLJ1	Putative HSP40 co-chaperone; repressed during the mating process	1.17747	0.12585
orf19.3289_933	ORF19.3289		Phosphorylated protein of unknown function	1.17742	0.03307
orf19.6757_336	ORF19.6757	GCY1	Aldo/keto reductase; mutation confers hypersensitivity to toxic ergosterol analog; farnesol-repressed; stationary phase enriched protein; flow model biofilm induced; Spider biofilm repressed	1.1773	0.07921
orf19.2408_722	ORF19.2408		Ortholog(s) have tRNA methyltransferase activity, role in tRNA methylation, wybutosine biosynthetic process and cytosol, nucleus localization	1.17699	0.13764
orf19.1442_1930	ORF19.1442	PLB4.5	Phospholipase B; Hog1-induced; regulated by Ssn6; putative GPI-anchor; repressed during cell wall regeneration; clade-associated gene expression; Hap43-induced; rat catheter and Spider biofilm repressed	1.17681	0.06954
orf19.2150_915	ORF19.2150		Putative ortholog of mammalian electron transfer flavoprotein complex subunit ETF-alpha; Spider biofilm repressed	1.17677	0.05177
orf19.5796_1504	ORF19.5796	SHE9	Protein with similarity to S. cerevisiae She9p, which inhibits growth when overproduced; gene has possible growth-regulation element; fungal-specific (no human or murine homolog)	1.17676	0.03636
orf19.2616_4483	ORF19.2616	UGT51C1	UDP-glucose:sterol glucosyltransferase; enzyme of sterol glucoside (membrane-bound lipid) biosynthesis; has UDP-sugar binding domain; activity is UDP-glucose-specific in vitro; enzyme does not use UDP-mannose; Mig1-regulated	1.17674	0.04959
orf19.2200_1075	ORF19.2200		Protein of unknown function; rat catheter biofilm repressed	1.1767	0.05741
orf19.367_2219	ORF19.367	CNH1	Na+/H+ antiporter; required for wild-type growth, cell morphology, and virulence in a mouse model of systemic infection; not transcriptionally regulated by NaCl; fungal-specific (no human or murine homolog)	1.17665	0.04691
orf19.547_351	ORF19.547		Ortholog(s) have 5'-flap endonuclease activity, single-stranded DNA 5'-3' exodeoxyribonuclease activity	1.17664	0.00579
orf19.1403_1582	ORF19.1403		Ortholog(s) have ATP:ADP antiporter activity, calcium ion binding activity, role in ADP transport, ATP transport, mitochondrial transport and mitochondrion localization	1.17645	0.01603
orf19.1614_1412	ORF19.1614	MEP1	Ammonium permease; Mep1 more efficient permease than Mep2, Mep2 has additional regulatory role; 11 predicted transmembrane regions; low mRNA abundance; hyphal downregulated; flow model biofilm induced	1.17631	0.42723
orf19.3051_700	ORF19.3051		Protein of unknown function; S. pombe ortholog SPAC17A2.02c plays a role in resistance to cadmium; colony morphology-related gene regulation by Ssn6; Spider biofilm repressed	1.17628	0.00375
orf19.6866_69	ORF19.6866		Putative U1-70K component of the U1 snRNP, involved in splicing; ortholog of S. cerevisiae SNP1; downregulated upon adherence to polystyrene	1.17625	0.08479
orf19.801_2059	ORF19.801	TBF1	Essential transcription factor; induces ribosomal protein genes and the rDNA locus; acts with Cbf1 at subset of promoters; recruits Fhl1 and Ifh1 to promoters; role is analogous to that of S. cerevisiae Rap1; Spider biofilm induced	1.17623	0.43095
orf19.2222_1078	ORF19.2222		Putative casein kinase; plasma membrane-localized	1.17614	0.12299
orf19.2708_709	ORF19.2708		Ortholog(s) have guanyl-nucleotide exchange factor activity, role in mature ribosome assembly and cytosol, nucleolus, polysome, preribosome, large subunit precursor localization	1.17606	0.00679
orf19.1036_1748	ORF19.1036	MNS1	Alpha-1,2-mannosidase; processes Man9GlcNAc2 to Man8GlcNAc2 isomer B; member of ER localized glycosyl hydrolase family 47; ER form is converted by Kex2 to cytosolic form; flow model biofilm repressed	1.17603	0.36755
orf19.6752_631	ORF19.6752		Ortholog(s) have structural constituent of ribosome activity and mitochondrial small ribosomal subunit localization	1.17599	0.04267
orf19.7092_614	ORF19.7092		Putative NAD dependent epimerase/dehydratase family protein; Spider biofilm repressed	1.17588	0.00827
orf19.295_1039	ORF19.295		Ortholog of C. dubliniensis CD36 : Cd36_82970, Lodderomyces elongisporus NRLL YB-4239 : LELG_02117, Debaryomyces hansenii CBS767 : DEHA2G01012g and Candida lusitaniae ATCC 42720 : CLUG_03529	1.17586	0.06141
orf19.3435_205	ORF19.3435		Ortholog of Candida albicans WO-1 : CAWG_05215	1.17583	0.00085
orf19.1887_1562	ORF19.1887		Ortholog(s) have sterol esterase activity, role in sterol metabolic process and integral to membrane, lipid particle localization	1.17563	0.07734
orf19.3239_2503	ORF19.3239	CTF18	Protein with a predicted role in sister chromatid cohesion; cell-cycle regulated periodic mRNA expression	1.1756	0.05136
orf19.7062_3442	ORF19.7062	RPA135	Putative RNA polymerase I subunit A135; repressed by prostaglandins	1.17558	0.00925
orf19.7260_685	ORF19.7260		Protein with a predicted NADP-dependent oxidoreductase or aldo-keto reductase domain; Hap43-repressed; Spider biofilm repressed	1.17554	0.09784
orf19.2715_1300	ORF19.2715	RPC53	Ortholog(s) have RNA polymerase III activity, role in tRNA transcription from RNA polymerase III promoter and DNA-directed RNA polymerase III complex localization	1.17554	0.01661
orf19.3881_880	ORF19.3881		Ortholog of C. dubliniensis CD36 : Cd36_31790, C. parapsilosis CDC317 : CPAR2_204900, Candida tenuis NRRL Y-1498 : CANTEDRAFT_136864 and Debaryomyces hansenii CBS767 : DEHA2F13200g	1.17553	0.03598
orf19.3538_2079	ORF19.3538	FRE9	Ferric reductase; alkaline induced; ciclopirox olamine; Hap43-induced	1.17534	0.241
orf19.5399_1131	ORF19.5399	IFF11	Secreted protein required for normal cell wall structure and for virulence; member of the IFF family; Hap43p-repressed gene	1.17521	0.02979
orf19.7091_775	ORF19.7091		Protein of unknown function; induced by nitric oxide; Spider biofilm repressed	1.17516	0.25926
orf19.873.1_353	ORF19.873.1	COX6	Putative cytochrome c oxidase; flucytosine induced	1.17508	0.15964
orf19.6018_1973	ORF19.6018	LRO1	Acyltransferase that catalyzes diacylglycerol esterification of phospholipids; role in lipid storage, triglyceride biosynthesis; flow model biofilm repressed	1.17508	0.0266
orf19.3983_1506	ORF19.3983		Protein with a predicted transcription factor BTF3 domain; flow model biofilm induced	1.17499	0.02516
orf19.4844_613	ORF19.4844		Ortholog(s) have RNA binding, polynucleotide adenylyltransferase activity, protein binding, bridging activity	1.17498	0.09128
orf19.3912_568	ORF19.3912	GLN3	GATA transcription factor, involved in regulation of nitrogen starvation-induced filamentous growth; regulates transcription of Mep2 ammonium permease; regulated by Gcn2 and Gcn4; mRNA binds She3; Spider biofilm induced	1.17498	0.09534
orf19.6039_821	ORF19.6039		Ortholog(s) have SNAP receptor activity and role in ER to Golgi vesicle-mediated transport, Golgi organization, intra-Golgi vesicle-mediated transport, vesicle fusion with Golgi apparatus	1.17493	0.05297
orf19.3297_207	ORF19.3297		Ortholog(s) have structural constituent of ribosome activity and mitochondrial small ribosomal subunit localization	1.17485	0.15996
orf19.4192.1_293	ORF19.4192.1		Ortholog of C. parapsilosis CDC317 : CPAR2_602880, C. dubliniensis CD36 : Cd36_60590, Candida tenuis NRRL Y-1498 : CANTEDRAFT_115034 and Debaryomyces hansenii CBS767 : DEHA2F15334g	1.17468	0.16092
orf19.4451_2771	ORF19.4451	RIA1	Putative translation elongation factor; genes encoding ribosomal subunits, translation factors, and tRNA synthetases are downregulated upon phagocytosis by murine macrophage	1.17468	0.08139
orf19.5450_1036	ORF19.5450	ETR1	Putative 2-enoyl thioester reductase; protein present in exponential and stationary growth phase yeast cultures; rat catheter biofilm repressed	1.1746	0.04388
orf19.3141_2644	ORF19.3141		Ortholog(s) have role in ER to Golgi vesicle-mediated transport and cytoplasmic mRNA processing body, endoplasmic reticulum membrane, extrinsic to membrane localization	1.17457	0.21227
orf19.2977_508	ORF19.2977	MIA40	Predicted component of the mitochondrial intermembrane space import machinery; Hap43p-repressed gene	1.17455	0.09715
orf19.4031_2392	ORF19.4031		Ortholog(s) have cytoplasm localization	1.17445	0.02453
orf19.6731_29	ORF19.6731		Protein of unknown function; repressed by alpha pheromone in SpiderM medium; Spider biofilm induced	1.17438	0.04345
orf19.6246_429	ORF19.6246		Ortholog(s) have peptide alpha-N-acetyltransferase activity, role in N-terminal peptidyl-methionine acetylation, cytoskeleton organization, mitochondrion inheritance and NatB complex, cytosol, nucleus localization	1.17431	0.06204
orf19.1757_1181	ORF19.1757		Putative C2H2 transcription factor; expression upregulated in clinical isolates from HIV+ patients with oral candidiasis; Spider biofilm induced	1.17423	0.04558
orf19.5953_1271	ORF19.5953		C2H2 transcription factor; predicted regulator of ribosomal protein and biogenesis genes; possibly essential, disruptants not obtained by UAU1 method; rat catheter biofilm induced	1.17423	0.22997
orf19.364_837	ORF19.364		Putative vacuolar H+-ATPase subunit; possibly an essential gene, disruptants not obtained by UAU1 method; Spider biofilm repressed	1.17416	0.03641
orf19.5676_1533	ORF19.5676		Ortholog(s) have cytosol, nucleus localization	1.17413	0.03039
orf19.5019_2026	ORF19.5019		Ortholog of C. dubliniensis CD36 : Cd36_12800, C. parapsilosis CDC317 : CPAR2_203460, Candida tenuis NRRL Y-1498 : CANTEDRAFT_94106 and Debaryomyces hansenii CBS767 : DEHA2C13948g	1.17409	0.01569
orf19.5063_486	ORF19.5063	COI1	Secreted protein; ciclopirox olamine induced; regulated by Ssn6; induced by nitric oxide independent of Yhb1; Hap43-induced; Spider biofilm repressed	1.174	0.21381
orf19.6291_3225	ORF19.6291		Ortholog(s) have DNA binding, DNA-dependent ATPase activity, chromatin binding activity	1.17394	0.10288
orf19.6626_522	ORF19.6626		Predicted homeodomain-containing protein; possible transcription factor; possibly transcriptionally regulated upon hyphal formation	1.17378	0.10578
orf19.643_3581	ORF19.643		Ortholog(s) have role in apoptotic process, mitotic spindle elongation, sister chromatid biorientation, spindle assembly checkpoint	1.17374	0.00029
orf19.5140_1874	ORF19.5140		Protein of unknown function; rat catheter and Spider biofilm induced	1.17366	0.00367
orf19.1180_883	ORF19.1180		Putative 2-aminoadipate transaminase; rat catheter and Spider biofilm repressed	1.17366	0.03712
orf19.6214_2979	ORF19.6214	ATC1	Cell wall acid trehalase; catalyzes hydrolysis of the disaccharide trehalose; similar to S. cerevisiae vacuolar acid trehalase (Ath1p); Hap43p-repressed gene	1.17363	0.00345
orf19.6254_916	ORF19.6254	ANT1	Peroxisomal adenine nucleotide transporter; role in beta-oxidation of medium-chain fatty acid and peroxisome proliferation; rat catheter biofilm induced	1.17348	0.20589
orf19.2593_1066	ORF19.2593	BIO2	Putative biotin synthase; induced by high iron; repressed by ciclopirox olamine; upregulated in clinical isolates from HIV+ patients with oral candidiasis; Hap43-repressed; Spider biofilm induced	1.17324	0.03299
orf19.6147_319	ORF19.6147		Putative histone chaperone; role in chromatin remodeling; rat catheter and Spider biofilm repressed	1.17314	0.15563
orf19.5537_769	ORF19.5537	WSC2	Putative cell wall integrity and stress response protein; mRNA binds She3; Spider biofilm induced	1.17303	0.25511
orf19.2088_568	ORF19.2088		Putative DNA polymerase epsilon subunit D; null mutant is viable but slow-growing and displays abnormal invasive growth on SD and YPD media; Spider biofilm repressed	1.17302	0.00022
orf19.6852_731	ORF19.6852		Ortholog of Rmd6 involved in S. cerevisiae sporulation; flow model biofilm induced	1.17301	0.02083
orf19.6667_82	ORF19.6667		Predicted histone deacetylase activity; Spider biofilm induced	1.1729	0.03143
orf19.4069_301	ORF19.4069		Protein of unknown function; repressed by alpha pheromone in SpiderM medium	1.17271	0.08941
orf19.7520_495	ORF19.7520	POT1	Putative peroxisomal 3-oxoacyl CoA thiolase; transcript regulated by Nrg1 and Mig1; farnesol regulated; Hap43-repressed	1.17268	0.05776
orf19.5700_76	ORF19.5700	TLO11	Member of a family of telomere-proximal genes of unknown function; may be spliced in vivo	1.17264	0.03246
orf19.5412_918	ORF19.5412		Ortholog of S. cerevisiae : ECM9, C. glabrata CBS138 : CAGL0L02255g, C. dubliniensis CD36 : Cd36_80470, C. parapsilosis CDC317 : CPAR2_503390 and Candida tenuis NRRL Y-1498 : CANTEDRAFT_133107	1.17244	0.15424
orf19.7079_3120	ORF19.7079		Ortholog(s) have role in axial cellular bud site selection and cellular bud neck contractile ring localization	1.1724	0.17474
orf19.5573_973	ORF19.5573		Protein of unknown function; expression downregulated in an ssr1 null mutant	1.17239	0.0316
orf19.6830_730	ORF19.6830		Putative enoyl-CoA hydratase; Spider biofilm induced	1.17237	0.03829
orf19.5626_1165	ORF19.5626		Protein of unknown function; Plc1-regulated; induced by Mnl1 under weak acid stress; flow model biofilm induced	1.17222	0.23944
orf19.998_1499	ORF19.998		Putative adapter protein; links synaptojanins Inp52 and Inp53 to the cortical actin cytoskeleton in S. cerevisiae; mutants are viable	1.17219	0.07809
orf19.4040_1298	ORF19.4040	ILV3	Dihydroxyacid dehydratase; repressed by nitric oxide; macrophage-induced protein; protein in exponential and stationary growth phase; Sef1, Sfu1p, Hap43-regulated; farnesol-repressed; flow model biofilm induced; Spider biofilm repressed	1.17215	0.07147
orf19.5791_723	ORF19.5791	IDH2	Putative mitochondrial NAD-isocitrate dehydrogenase subunit; induced by ciclopirox; induced in high iron; present in exponential and stationary growth phases; Spider biofilm repressed	1.17211	0.00102
orf19.6392_979	ORF19.6392		Ortholog of C. dubliniensis CD36 : Cd36_33870, C. parapsilosis CDC317 : CPAR2_204450, Candida tenuis NRRL Y-1498 : CANTEDRAFT_113827 and Debaryomyces hansenii CBS767 : DEHA2E04158g	1.17188	0.0053
orf19.956_8845	ORF19.956		Ortholog(s) have role in fermentation and mitochondrion localization	1.17188	0.43021
orf19.4658_2332	ORF19.4658		RING finger and CHY zinc finger domain-containing protein; mutant are viable	1.17187	0.12512
orf19.4676_454	ORF19.4676		Protein with homology to mitochondrial intermembrane space proteins; regulated by Sef1p-, Sfu1p-, and Hap43p	1.17181	0.15109
orf19.3894_712	ORF19.3894		Putative inositol oxygenase; mutation confers hypersensitivity to toxic ergosterol analog; Spider biofilm induced	1.17175	0.05333
orf19.7092_733	ORF19.7092		Putative NAD dependent epimerase/dehydratase family protein; Spider biofilm repressed	1.17173	0.02216
orf19.3278_1823	ORF19.3278	GSY1	UDP glucose/starch glucosyltransferase; transcript repressed by yeast-hyphal switch, Efg1-regulated; strong oxidative stress induced; colony morphology-related regulation by Ssn6; stationary phase enriched; flow model biofilm induced	1.17149	0.36891
orf19.5609_880	ORF19.5609		Ortholog of C. dubliniensis CD36 : Cd36_63840, C. parapsilosis CDC317 : CPAR2_601510, Debaryomyces hansenii CBS767 : DEHA2A06270g and Pichia stipitis Pignal : PICST_31363	1.17132	0.00443
orf19.5830_2612	ORF19.5830	LHS1	Protein similar to S. cerevisiae Hsp70p; predicted Kex2p substrate; possibly essential, disruptants not obtained by UAU1 method; flow model biofilm repressed	1.17132	0.00451
orf19.2102_775	ORF19.2102	CKB1	Regulatory subunit of protein kinase CK2 (casein kinase II), beta subunit; null mutants are hypersensitive to caspofungin and hydrogen peroxide medium	1.17128	0.01628
orf19.4193_297	ORF19.4193		Ortholog(s) have Arp2/3 complex binding activity, role in actin cortical patch assembly, actin filament debranching, negative regulation of Arp2/3 complex-mediated actin nucleation and actin cortical patch, cytosol, nucleus localization	1.17126	0.06517
orf19.1111_527	ORF19.1111		Ortholog(s) have chromatin binding, protein complex scaffold activity and role in RNA polymerase II transcriptional preinitiation complex assembly, histone acetylation	1.17121	0.308
orf19.680_1306	ORF19.680	TIM50	Predicted component of the Translocase of the Inner Mitochondrial membrane (TIM23 complex); involved in mitochondrial protein import; Spider biofilm repressed	1.17117	0.00184
orf19.5705_2300	ORF19.5705	NAM2	Mitochondrial leucyl-tRNA synthetase	1.17109	0.17766
orf19.4778_2008	ORF19.4778	LYS142	Zn(II)2Cys6 transcription factor; has similarity to S. cerevisiae Lys14, involved in the regulation of lysine biosynthesis genes; fungal-specific	1.17105	0.21811
orf19.1122_666	ORF19.1122		Protein of unknown function; induced by alpha pheromone in SpiderM medium; Spider biofilm induced	1.1707	0.20104
orf19.6008.3_330	ORF19.6008.3		Ortholog of C. dubliniensis CD36 : Cd36_00920, Debaryomyces hansenii CBS767 : DEHA2F20724g, Pichia stipitis Pignal : PICST_32745 and Candida albicans WO-1 : CAWG_01277	1.17066	0.02328
orf19.7664_113	ORF19.7664		Ortholog(s) have nucleolus localization	1.17064	0.02423
orf19.7053_1590	ORF19.7053	GAC1	Putative regulatory subunit of ser/thr phosphoprotein phosphatase 1; fluconazole-induced; caspofungin repressed; transcript induced by Mnl1 under weak acid stress; regulated by Nrg1, Tup1; Spider and flow model biofilm induced	1.17064	0.20111
orf19.6143_1967	ORF19.6143		Predicted long-chain-alcohol oxidase; Spider biofilm induced	1.17061	0.13181
orf19.4589_1348	ORF19.4589		Ortholog(s) have polyamine oxidase activity, role in pantothenate biosynthetic process, polyamine catabolic process and cytoplasm localization	1.1706	0.10297
orf19.6874_1718	ORF19.6874		Putative helix-loop-helix (HLH) transcription factor with a role in filamentous growth	1.17056	0.36135
orf19.3973_717	ORF19.3973		Ortholog of Hua1, a zinc finger domain protein with sequence similarity to Type I J-proteins; flow model biofilm induced	1.17041	0.67883
orf19.5547_63	ORF19.5547		Protein of unknown function; Hap43-repressed gene	1.17039	0.42712
orf19.2036_1021	ORF19.2036		Predicted dihydrodiol dehydrogenase; ortholog of S. pombe SPAC513.06c; flow model and rat catheter biofilm repressed	1.1703	0.0227
orf19.6591_255	ORF19.6591	PCD1	Ortholog(s) have 8-oxo-7,8-dihydroguanosine triphosphate pyrophosphatase activity, role in DNA repair and peroxisome localization	1.17029	0.03835
orf19.3335_286	ORF19.3335		Plasma membrane protein of unknown function; colony morphology-related gene regulation by Ssn6; repressed by nitric oxide	1.17028	0.07161
orf19.1542_607	ORF19.1542	HEX3	Protein similar to S. cerevisiae Hex3p, which is involved in DNA damage response; transposon mutation affects filamentous growth	1.17004	0.07621
orf19.2612_693	ORF19.2612		C2H2 zinc finger transcription factor; expression reduced in ssr1 null mutant; flow model biofilm induced	1.16999	0.21435
orf19.4168_294	ORF19.4168		Ortholog(s) have ribonuclease MRP activity, ribonuclease P activity, role in intronic box C/D snoRNA processing, mRNA cleavage and nucleolar ribonuclease P complex, ribonuclease MRP complex localization	1.16997	0.19039
orf19.7227_197	ORF19.7227		Protein phosphatase inhibitor; Hap43-repressed; homozygous Tn insertion decreases colony wrinkling but does not block hyphal growth in liquid media; mutation confers hypersensitivity to toxic ergosterol analog; Spider biofilm induced	1.16991	0.00146
orf19.1037_1565	ORF19.1037		Protein of unknown function; rat catheter biofilm repressed	1.16988	0.16782
orf19.50_1675	ORF19.50		Ortholog(s) have role in SCF-dependent proteasomal ubiquitin-dependent protein catabolic process, cellular response to DNA damage stimulus, cellular response to methylmercury and SCF ubiquitin ligase complex, cytosol, nucleus localization	1.1698	0.01927
orf19.3629_1831	ORF19.3629	DSE1	Essential cell wall protein involved in cell wall integrity and rigidity; periodic mRNA expression peaks at M/G1 phase; Ace2p-induced; required for virulence in a mouse model of infection	1.16973	0.15378
orf19.1405_768	ORF19.1405	PHO13	Putative 4-nitrophenylphosphatase; Hap43p-repressed gene; transcription is regulated upon yeast-hyphal switch	1.16971	0.29485
orf19.7581_1148	ORF19.7581		Protein with a predicted role in assembly of U2 snRNP into the spliceosome; Spider biofilm induced	1.16969	0.00885
orf19.7398_246	ORF19.7398		Protein of unknown function' Hap43-induced gene; repressed by prostaglandins	1.16964	0.20011
orf19.2471_410	ORF19.2471	GIM5	Putative heterohexameric cochaperone prefoldin complex subunit; macrophage/pseudohyphal-repressed gene and macrophage-induced protein	1.16954	0.03805
orf19.1401_1617	ORF19.1401	EAP1	GPI-anchored cell wall adhesin; Efg1-regulated; mutant suppresses cell adhesion, filamentation, invasive growth defects of S. cerevisiae flo8 or flo11 mutant; biofilm induced; required for biofilm formation; Bcr1-repressed in a/a biofilms	1.16953	0.06998
orf19.7672_581	ORF19.7672		Ortholog(s) have role in ER-associated ubiquitin-dependent protein catabolic process, endoplasmic reticulum unfolded protein response	1.16951	0.16699
orf19.2987_1491	ORF19.2987		Ortholog(s) have role in cellular ion homeostasis, establishment or maintenance of cell polarity, mitochondrion inheritance, regulation of cardiolipin metabolic process and mitochondrial inner membrane, nucleus localization	1.16945	0.16215
orf19.842_71	ORF19.842	ASR3	Adenylyl cyclase and stress responsive protein; induced in cyr1 or ras1 mutant; Spider biofilm induced	1.16934	0.2076
orf19.541_736	ORF19.541		Has domain(s) with predicted oxidoreductase activity, acting on paired donors, with incorporation or reduction of molecular oxygen, 2-oxoglutarate as one donor, and incorporation of one atom each of oxygen into both donors activity	1.16931	0.10515
orf19.1523_1415	ORF19.1523	FMO1	Putative oxidoreductase; mutation confers hypersensitivity to toxic ergosterol analog, and to amphotericin B	1.16927	0.04342
orf19.5399_1284	ORF19.5399	IFF11	Secreted protein required for normal cell wall structure and for virulence; member of the IFF family; Hap43p-repressed gene	1.16927	0.04061
orf19.5808_1144	ORF19.5808		Ortholog(s) have protein-lysine N-methyltransferase activity, role in negative regulation of G2/M transition of mitotic cell cycle, peptidyl-lysine methylation and cytosol, nucleus localization	1.16926	0.09205
orf19.446_561	ORF19.446		Protein of unknown function; constitutive expression independent of MTL or white-opaque status; upregulated in a cyr1 mutant	1.16924	0.05619
orf19.6181_64	ORF19.6181		Ortholog of Candida albicans WO-1 : CAWG_03093	1.16923	0.02189
orf19.5608_722	ORF19.5608		RNA polymerase III subunit; Spider biofilm induced	1.16923	0.03668
orf19.7436_1316	ORF19.7436	AAF1	Possible regulatory protein; possible adhesin-like; Glu-rich domain; production in S. cerevisiae increases endothelial cell adherence and flocculence; flow model biofilm, alkaline or caspofungin induced	1.16913	0.06255
orf19.4120_1183	ORF19.4120	LAS1	Putative bud formation and morphogenesis protein; mutation confers hypersensitivity to 5-fluorocytosine (5-FC), 5-fluorouracil (5-FU); macrophage-induced; Spider biofilm induced	1.16906	0.01998
orf19.5404_1515	ORF19.5404			1.16906	0.14223
orf19.1948_1146	ORF19.1948		Ortholog of C. dubliniensis CD36 : Cd36_51110, C. parapsilosis CDC317 : CPAR2_302560, Candida tenuis NRRL Y-1498 : CANTEDRAFT_135271 and Debaryomyces hansenii CBS767 : DEHA2E12914g	1.16902	0.02656
orf19.2262_990	ORF19.2262		Protein similar to quinone oxidoreductases; induced by benomyl treatment, nitric oxide; oxidative stress-induced via Cap1; stationary-phase enriched protein; Spider biofilm induced	1.16885	0.03192
orf19.4330_1597	ORF19.4330		Ortholog of C. dubliniensis CD36 : Cd36_52790, Candida tropicalis MYA-3404 : CTRG_05968 and Candida albicans WO-1 : CAWG_04684	1.1687	0.11872
orf19.7379_1692	ORF19.7379	FAA2	Putative acyl CoA synthetase; expression regulated upon white-opaque switch; rat catheter biofilm induced; Spider biofilm induced	1.16866	0.0737
orf19.69_679	ORF19.69		Protein of unknown function; induced by Mnl1 under weak acid stress	1.1684	0.14603
orf19.5401_2011	ORF19.5401			1.16831	0.01518
orf19.6065_913	ORF19.6065		RNA polymerase II holoenzyme/mediator subunit; regulated by Mig1, Tup1; amphotericin B, caspofungin repressed; protein present in exponential and stationary growth phase yeast; Hap43-repressed; Spider biofilm repressed	1.16826	0.12542
orf19.5174_196	ORF19.5174	TAF19	Putative TFIID subunit; mutation confers hypersensitivity to amphotericin B; rat catheter biofilm induced	1.16783	0.14904
orf19.3567_1156	ORF19.3567	BIO32	Putative class III aminotransferase with a predicted role in biotin biosynthesis; Spider biofilm induced	1.1678	0.1378
orf19.5445_1297	ORF19.5445	GLO3	Putative ARF GTPase activator; role in COPI coating of Golgi vesicle, ER to Golgi vesicle-mediated transport, retrograde Golgi to ER vesicle-mediated transport; Spider biofilm repressed	1.16757	0.07025
orf19.5934_1517	ORF19.5934		Ortholog(s) have DNA topoisomerase type I activity	1.16733	0.11294
orf19.2604_1349	ORF19.2604		S. pombe ortholog SPAC2C4.06c is a predicted tRNA (cytosine-5-)-methyltransferase; Spider biofilm induced	1.16727	0.00871
orf19.309_1211	ORF19.309	DAL5	Allantoate permease; nitrogen catabolite repressed, induced in absence of preferred N sources; nitrogen source regulation requires Gat1; possibly essential gene (by UAU1 method); Hap43-repressed	1.16725	0.256
orf19.4448_2311	ORF19.4448	SOG2	Leucine-rich-repeat domain protein of RAM cell wall integrity signaling network; role in cell separation, azole sensitivity; required for hyphal growth; lacks orthologs in higher eukaryotes	1.16715	0.08251
orf19.4096_976	ORF19.4096	TAZ1	Putative lyso-phosphatidylcholine acyltransferase, required for normal phospholipid content of mitochondrial membranes; rat catheter biofilm induced	1.16692	0.08744
orf19.5107_1861	ORF19.5107	NOT5	Protein with similarity to S. cerevisiae Not5p, a member of the transcription regulatory CCR4-NOT complex; required for hyphal growth; antigenic during human oral infection; greater expression in yeast-form cells than hyphae	1.16682	0.01297
orf19.4757_1410	ORF19.4757	NAR1	Putative cytosolic iron-sulfur (FeS) protein assembly machinery protein; induced by nitric oxide; oxidative stress-induced via Cap1p	1.16675	0.03195
orf19.7469_1423	ORF19.7469	ARG1	Argininosuccinate synthase; arginine synthesis; Gcn4, Rim101 regulated; induced by amino acid starvation (3-AT), benomyl treatment; stationary phase enriched protein; repressed in alkalinizing medium; rat catheter, Spider biofilm induced	1.16656	0.03695
orf19.1488_59	ORF19.1488		Ortholog of C. dubliniensis CD36 : Cd36_16630, C. parapsilosis CDC317 : CPAR2_210300, Candida tenuis NRRL Y-1498 : CANTEDRAFT_116870 and Debaryomyces hansenii CBS767 : DEHA2B04334g	1.16645	0.00669
orf19.3417_2042	ORF19.3417	ACF2	Putative endo-1,3-beta-glucanase; fungal-specific (no human or murine homolog)	1.16643	0.01149
orf19.1371_1437	ORF19.1371		Ortholog of C. dubliniensis CD36 : Cd36_23880, C. parapsilosis CDC317 : CPAR2_806590, Candida tenuis NRRL Y-1498 : CANTEDRAFT_92769 and Debaryomyces hansenii CBS767 : DEHA2B13376g	1.16639	0.01367
orf19.6208_2152	ORF19.6208	MEF2	Putative mitochondrial translation elongation factor; caspofungin induced	1.16639	0.02832
orf19.3504_318	ORF19.3504	RPL23A	Ribosomal protein; downregulated upon phagocytosis by murine macrophage; Hap43-induced; sumoylation target; Spider biofilm repressed	1.16629	0.0914
orf19.6881_481	ORF19.6881	YTH1	Putative mRNA cleavage and polyadenylation specificity factor; transcription is regulated upon yeast-hyphal switch; decreased expression in hyphae compared to yeast-form cells; fluconazole or flucytosine induced	1.16626	0.17879
orf19.3378_118	ORF19.3378		Protein of unknown function; regulated by Tsa1, Tsa1B in minimal media at 37 degrees C	1.16613	0.06523
orf19.2965.1_129	ORF19.2965.1		Protein of unknown function; similar to human SERF2; gene has an alternatively spliced intron	1.16613	0.16696
orf19.4542_1129	ORF19.4542		Ortholog(s) have cyclin-dependent protein serine/threonine kinase inhibitor activity and role in phosphorylation of RNA polymerase II C-terminal domain, regulation of mitotic cell cycle, transcription from RNA polymerase II promoter	1.16605	0.04851
orf19.6445_721	ORF19.6445	ECI1	Protein similar to S. cerevisiae Eci1p, which is involved in fatty acid oxidation; transposon mutation affects filamentous growth; expression is regulated upon white-opaque switching	1.16604	0.22999
orf19.6737_718	ORF19.6737		Protein of unknown function; mutants are viable; induced in a cyr1, ras1, or efg1 homozygous null	1.166	0.13099
orf19.3414_725	ORF19.3414	SUR7	Protein required for normal cell wall, plasma membrane, cytoskeletal organization, endocytosis; localizes to eisosome subdomains of plasma membrane; four transmembrane motifs; mutant shows ectopic, chitin-rich cell wall; fluconazole-induced	1.16584	0.45649
orf19.2963_862	ORF19.2963		Has domain(s) with predicted NAD+ binding activity	1.16579	0.14694
orf19.3393_956	ORF19.3393		Putative DEAD-box helicase; Hap43-induced; Spider biofilm induced	1.16561	0.31846
orf19.422_2108	ORF19.422	SPT20	Putative transcription factor; downregulated upon adherence to polystyrene; flucytosine repressed	1.1656	0.03625
orf19.2909_652	ORF19.2909	ERG26	C-3 sterol dehydrogenase, catalyzes the 2nd of 3 steps required to remove 2 C-4 methyl groups from an intermediate in ergosterol biosynthesis; amphotericin B, caspofungin repressed; Spider biofilm repressed	1.16556	0.01755
orf19.1393_768	ORF19.1393		Ortholog(s) have NAD transporter activity, pyruvate secondary active transmembrane transporter activity, role in NAD transmembrane transport, mitochondrial pyruvate transport and endoplasmic reticulum, mitochondrion localization	1.16555	0.03336
orf19.2314_102	ORF19.2314		Protein with a role in nucleolar integrity and processing of pre-rRNA; mutation confers hypersensitivity to 5-fluorocytosine (5-FC), 5-fluorouracil (5-FU), and tubercidin (7-deazaadenosine); Hap43-induced; Spider biofilm induced	1.16555	0.27247
orf19.4841_860	ORF19.4841	SHY1	Cytochrome c oxidase biosynthesis protein; transcript regulated by Nrg1 and Mig1	1.16535	0.31059
orf19.5785_820	ORF19.5785		Protein of unknown function; upregulated in a cyr1 or ras1 null mutant; induced by nitric oxide	1.16525	0.03439
orf19.5667_2335	ORF19.5667	MNR2	Putative ion transporter; fungal-specific (no human or murine homolog)	1.16503	0.00381
orf19.4606_1142	ORF19.4606	ERG8	Putative phosphomevalonate kinase; enzyme of the mevalonate pathway of isoprenoid biosynthesis; transcript regulated by Nrg1; possible drug target; not conserved in H. sapiens	1.16499	0.03293
orf19.1649_1030	ORF19.1649	RNA1	Putative GTPase-activating protein; protein level decreases in stationary phase cultures; Spider biofilm repressed	1.16492	0.00458
orf19.7011_2978	ORF19.7011		Ortholog(s) have 90S preribosome, cytoplasm, mitotic spindle pole body, nucleolus localization	1.16486	0.18403
orf19.3311_469	ORF19.3311	IFD3	Putative aldo/keto reductase; Mig1-regulated	1.16486	0.03583
orf19.705_228	ORF19.705	GCN5	Putative histone acetyltransferase; mutation confers hypersensitivity to 5-fluorouracil (5-FU); possibly an essential gene, disruptants not obtained by UAU1 method	1.16477	0.15921
orf19.6502_878	ORF19.6502		Short-chain dehydrogenase/reductase; upregulation correlates with clinical development of fluconazole resistance	1.16476	0.03646
orf19.1422_2566	ORF19.1422	FZO1	Mitochondrial biogenesis protein; rat catheter and Spider biofilm induced	1.1647	0.15042
orf19.5940_1909	ORF19.5940	ZCF32	Predicted Zn(II)2Cys6 transcription factor; possibly an essential gene, disruptants not obtained by UAU1 method; Hap43-repressed	1.16466	0.04887
orf19.7101_1744	ORF19.7101		Ortholog(s) have telomeric DNA binding activity, role in protein localization to chromosome, telomere maintenance via telomerase and ASTRA complex, nuclear telomere cap complex localization	1.16462	0.10643
orf19.2803_822	ORF19.2803	HEM13	Coproporphyrinogen III oxidase; antigenic; on yeast cell surface, not hyphae; iron-regulated expression; Hap43, macrophage-repressed; farnesol-induced; possibly essential; flow model biofilm induced; rat catheter, Spider biofilm repressed	1.16441	0.14945
orf19.676_799	ORF19.676		Microtubule-binding protein of the cortical microtubule; delays exit from mitosis when the spindle is abnormally oriented; Spider biofilm repressed	1.16439	0.01358
orf19.6129_679	ORF19.6129	MRPL8	Mitochondrial 60S ribosomal protein subunit; Hap43p-repressed gene	1.16435	0.08315
orf19.2760_4166	ORF19.2760		Putative mRNA cleavage and polyadenylation factor; heterozygous null mutant exhibits hypersensitivity to parnafungin and cordycepin in the C. albicans fitness test	1.16424	0.00912
orf19.7581_1024	ORF19.7581		Protein with a predicted role in assembly of U2 snRNP into the spliceosome; Spider biofilm induced	1.16412	0.01633
orf19.3422_7648	ORF19.3422	FMP27	Putative mitochondrial protein; mRNA binds She3	1.1641	0.11196
orf19.331_607	ORF19.331		Ortholog(s) have S-adenosylmethionine-dependent methyltransferase activity, protein methyltransferase activity and role in peptidyl-glutamine methylation, regulation of translation	1.16407	0.1663
orf19.5634_1291	ORF19.5634	FRP1	Ferric reductase; alkaline-induced by Rim101; iron-chelation-induced by CCAAT-binding factor; fluconazole-repressed; ciclopirox-, hypoxia-, Hap43-induced; colony morphology-related regulation by Ssn6; Spider and flow model biofilm induced	1.16401	0.18527
orf19.5710_3139	ORF19.5710		Nucleoporin component of central core of the nuclear pore complex; mRNA binds She3	1.16383	0.10049
orf19.5710_2942	ORF19.5710		Nucleoporin component of central core of the nuclear pore complex; mRNA binds She3	1.16375	0.023
orf19.1182_805	ORF19.1182		Ortholog(s) have SNAP receptor activity, phosphatidylinositol-3-phosphate binding activity and role in piecemeal microautophagy of nucleus, vacuole fusion, non-autophagic, vesicle fusion	1.16375	0.12401
orf19.6740_973	ORF19.6740		Ortholog(s) have ubiquitin-protein ligase activity and role in generation of catalytic spliceosome for first transesterification step	1.16366	0.05667
orf19.1057_38	ORF19.1057		Ortholog of C. dubliniensis CD36 : Cd36_03980, C. parapsilosis CDC317 : CPAR2_107050, Candida tenuis NRRL Y-1498 : CANTEDRAFT_113999 and Debaryomyces hansenii CBS767 : DEHA2D12518g	1.16366	0.09562
orf19.3318_2153	ORF19.3318		Ortholog(s) have cytoplasm localization	1.16362	0.08082
orf19.501_1743	ORF19.501		Ortholog(s) have RNA methyltransferase activity, role in maturation of LSU-rRNA from tricistronic rRNA transcript (SSU-rRNA, 5.8S rRNA, LSU-rRNA) and nucleolus, preribosome, large subunit precursor localization	1.16362	0.01881
orf19.5188_2866	ORF19.5188	CHS1	Chitin synthase; essential; for primary septum synthesis in yeast and hyphae; 1 of several chitin synthases; enzymatically activated by proteolytic processing; complements defects of S. cerevisiae chs1 or chs2; Spider biofilm repressed	1.16362	0.24387
orf19.6982_135	ORF19.6982		Ortholog(s) have ribosome binding activity and mitochondrion localization	1.16358	0.04913
orf19.4628_1085	ORF19.4628		Putative cleavage and polyadenylation factor; heterozygous null mutant exhibits hypersensitivity to parnafungin and cordycepin in the C. albicans fitness test; possibly an essential gene, disruptants not obtained by UAU1 method	1.16344	0.00041
orf19.6510_313	ORF19.6510	GRX1	Putative glutaredoxin; induced in low iron	1.16329	0.00381
orf19.5507_133	ORF19.5507	ENP1	Protein required for pre-rRNA processing and 40S ribosomal subunit synthesis; associated with U3 and U14 snoRNAs; transposon mutation affects filamentous growth; repressed by prostaglandins; Spider biofilm induced	1.16319	0.01034
orf19.6898.1_208	ORF19.6898.1		Ortholog(s) have mitochondrion localization	1.16305	0.14251
orf19.5507_382	ORF19.5507	ENP1	Protein required for pre-rRNA processing and 40S ribosomal subunit synthesis; associated with U3 and U14 snoRNAs; transposon mutation affects filamentous growth; repressed by prostaglandins; Spider biofilm induced	1.16296	0.33622
orf19.4962_448	ORF19.4962	RMP1	Ortholog of Rmp1; subunit of RNase MRP subunit that processes pre-rRNA and has a role in cell cycle-regulated degradation of daughter cell-specific mRNAs; rat catheter and Spider biofilm induced	1.16289	0.0993
orf19.6133_2610	ORF19.6133	PIF1	Putative DNA helicase; decreased transcription is observed upon fluphenazine treatment	1.16281	0.12802
orf19.88_1144	ORF19.88	ILV5	Ketol-acid reductoisomerase; antigenic; regulated by Gcn4; GlcNAc, amino acid starvation (3-AT)-induced; macrophage-repressed protein; protein present in exponential and stationary phase; flow model and Spider biofilm repressed	1.16277	0.17521
orf19.2544_538	ORF19.2544		Ortholog(s) have aminoacyl-tRNA hydrolase activity, role in negative regulation of proteasomal ubiquitin-dependent protein catabolic process and mitochondrial outer membrane localization	1.16269	0.04605
orf19.6967_3269	ORF19.6967	USO6	Putative vesicular transport protein; transcript induced by filamentous growth; rat catheter biofilm repressed	1.16266	0.05058
orf19.2457_1508	ORF19.2457		Protein of unknown function; induced during chlamydospore formation in both C. albicans and C. dubliniensis; Spider biofilm induced	1.16259	0.14458
orf19.1548_443	ORF19.1548		Ortholog(s) have role in mRNA splicing, via spliceosome and U4/U6 x U5 tri-snRNP complex localization	1.16257	0.0392
orf19.20_2440	ORF19.20	RTS1	Putative serine/threonine-protein phosphatase B-type regulatory subunit; transcription is regulated upon yeast-hyphal switch	1.16254	0.0157
orf19.2185_988	ORF19.2185	NSA1	Putative 66S pre-ribosomal particles conmponent; Hap43-induced; repressed by prostaglandins	1.16253	0.10208
orf19.5316_2264	ORF19.5316	FGR29	Protein lacking an ortholog in S. cerevisiae; transposon mutation affects filamentous growth; rat catheter biofilm repressed	1.16252	0.09426
orf19.1417_258	ORF19.1417		Ortholog of C. dubliniensis CD36 : Cd36_43970, C. parapsilosis CDC317 : CPAR2_401720, Candida tenuis NRRL Y-1498 : CANTEDRAFT_102588 and Debaryomyces hansenii CBS767 : DEHA2G16698g	1.1625	0.2726
orf19.6448_1915	ORF19.6448		Protein of unknown function; Spider biofilm repressed	1.16244	0.11275
orf19.1940_682	ORF19.1940		Ortholog(s) have role in cellular response to cadmium ion, detoxification of cadmium ion, ubiquinone biosynthetic process and mitochondrial inner membrane localization	1.16243	0.00506
orf19.6500_1206	ORF19.6500	ECM42	Ornithine acetyltransferase; Gcn2, Gcn4-regulated; clade-specific gene expression; possibly essential gene, disruptants not obtained by UAU1 method; Spider biofilm induced	1.16231	0.09287
orf19.2236_2967	ORF19.2236	FHL1	Fork-head transcription factor; forms a heterodimer with Ifh1 that is tethered to promoters by Tbf1; positively regulates rRNA and ribosomal protein gene transcription	1.16224	0.02613
orf19.570_1952	ORF19.570	IFF8	Putative GPI-anchored adhesin-like protein; decreased transcription is observed in an azole-resistant strain that overexpresses MDR1	1.16218	0.11838
orf19.3302_1971	ORF19.3302		Putative type-1 protein phosphatase targeting subunit; transcript repressed by yeast-hyphal switch; transcript induced by Mnl1p under weak acid stress; flow model biofilm induced	1.16207	0.76446
orf19.3773_1888	ORF19.3773	CDL1	Putative RNAse III, ortholog of S. cerevisiae RNT1; merged with orf19.3772 in Assembly 21	1.162	0.07547
orf19.2661_289	ORF19.2661	TLO34	Non-telomeric member of a family of telomere-proximal genes of unknown function; predicted N-terminus is extended, relative to that of other family members; overlaps orf19.2662	1.16192	0.08999
orf19.4393_1113	ORF19.4393	CIT1	Citrate synthase; induced by phagocytosis; induced in high iron; Hog1-repressed; Efg1-regulated under yeast, not hyphal growth conditions; present in exponential and stationary phase; Spider biofilm repressed; rat catheter biofilm induced	1.16174	0.29069
orf19.7680_694	ORF19.7680	CTA26	Putative transcription factor/activator; Med2 mediator complex ddomain; transcript is upregulated in an RHE model of oral candidiasis; member of a family of telomere-proximal genes; Efg1, Hap43-repressed	1.16173	0.025
orf19.1426_1111	ORF19.1426		Ortholog of S. cerevisiae Skg6; localizes to the cell cortex, cell bud neck, cell bud tip, incipient cellular bud site, and is membrane-bound; Spider biofilm induced	1.1617	0.90058
orf19.3900_1549	ORF19.3900		Ortholog(s) have role in mitochondrial fusion and integral to mitochondrial outer membrane localization	1.1617	0.24368
orf19.2106_446	ORF19.2106		Putative protein of unknown function; Hap43p-repressed gene	1.16167	0.04504
orf19.2590_523	ORF19.2590		Putative dethiobiotin synthetase; transcript upregulated in clinical isolates from HIV+ patients with oral candidiasis; Hap43-repressed; GlcNAc-induced protein; Spider biofilm induced	1.16151	0.0342
orf19.7011_3469	ORF19.7011		Ortholog(s) have 90S preribosome, cytoplasm, mitotic spindle pole body, nucleolus localization	1.16139	0.10072
orf19.1588_284	ORF19.1588		Putative mitochondrial protein of unknown function; regulated by Sef1p-, Sfu1p-, and Hap43p	1.1613	0.00079
orf19.6496_467	ORF19.6496	TRS33	Putative TRAPP complex subunit; constitutive expression independent of MTL or white-opaque status	1.16128	0.25696
orf19.5392_1363	ORF19.5392	NGT1	N-acetylglucosamine (GlcNAc)-specific transporter; role in GlcNAc (but not serum) induced hyphal growth; localizes to plasma membrane; induced by GlcNAc, macrophage engulfment; 12 transmembrane, major facilitator superfamily	1.16127	0.06749
orf19.5369_1016	ORF19.5369		Uroporphyrinogen decarboxylase; catalyzes the 5th step in the heme biosynthetic pathway; flow model and Spider biofilm repressed	1.16125	0.06278
orf19.2591_1174	ORF19.2591		Ortholog(s) have adenosylmethionine-8-amino-7-oxononanoate transaminase activity and role in biotin biosynthetic process	1.16121	0.15927
orf19.1613_1943	ORF19.1613	ILV2	Putative acetolactate synthase; regulated by Gcn4p; induced by amino acid starvation (3-AT treatment); stationary phase enriched protein	1.16097	0.11936
orf19.3409_2310	ORF19.3409	SEC12	Putative guanyl-nucleotide exchange factor; induced in high iron; Hap43-repressed	1.16097	0.01089
orf19.1524_1258	ORF19.1524	SPR3	Septin; mutant has no obvious phenotype	1.16091	0.01795
orf19.1646_2398	ORF19.1646		Ortholog(s) have rRNA primary transcript binding activity	1.16082	0.02685
orf19.6934_961	ORF19.6934		Ortholog(s) have role in protein insertion into mitochondrial membrane from inner side and integral to mitochondrial inner membrane localization	1.16073	0.06496
orf19.6399_790	ORF19.6399	ATS1	Protein required for modification of wobble nucleosides in tRNA; induced upon adherence to polystyrene; regulated by Sef1, Sfu1, and Hap43	1.16072	0.07881
orf19.7506_930	ORF19.7506		Ortholog(s) have ATPase activity, DNA binding, nucleosome binding activity, role in chromatin remodeling and Isw1 complex localization	1.1607	0.00365
orf19.4567_689	ORF19.4567		Catechol 1,2-dioxygenase (1,2-CTD), involved in degradation of aromatic compounds; Spider biofilm induced	1.16069	0.35094
orf19.4035_987	ORF19.4035	PGA4	GPI-anchored cell surface protein; beta-1,3-glucanosyltransferase with similarity to the A. fumigatus GEL family; transcript induced in RHE model of oral candidiasis; fluconazol-induced	1.16065	0.09447
orf19.5558_1162	ORF19.5558	RBF1	Transcription factor; glutamine-rich activation domain; binds RPG-box DNA sequences; predominantly nuclear; mutation causes accelerated induction of filamentous growth; antigenic during human oral infection; Sko1p-repressed	1.16061	0.00653
orf19.4068_2181	ORF19.4068		Protein of unknown function; flow model biofilm induced	1.16058	0.16105
orf19.2210_1784	ORF19.2210		Protein of unknown function; Spider biofilm induced	1.16038	0.30053
orf19.1196_2292	ORF19.1196	PKH3	Ortholog(s) have protein kinase activity and role in MAPK cascade involved in cell wall biogenesis, protein phosphorylation	1.16034	0.00751
orf19.5388_1273	ORF19.5388	SWD1	Ortholog(s) have histone methyltransferase activity (H3-K4 specific) activity, role in chromatin silencing at telomere, histone H3-K4 methylation, telomere maintenance and Set1C/COMPASS complex, cytosol localization	1.16033	0.17792
orf19.6227_647	ORF19.6227		Ortholog of C. dubliniensis CD36 : Cd36_06390, C. parapsilosis CDC317 : CPAR2_209040, Candida tenuis NRRL Y-1498 : CANTEDRAFT_114052 and Debaryomyces hansenii CBS767 : DEHA2D14300g	1.16031	0.00659
orf19.949_2107	ORF19.949		Ortholog of C. dubliniensis CD36 : Cd36_50420, C. parapsilosis CDC317 : CPAR2_304100, Candida tenuis NRRL Y-1498 : CANTEDRAFT_98299 and Debaryomyces hansenii CBS767 : DEHA2B07634g	1.1603	0.07865
orf19.4195_245	ORF19.4195		Ortholog of C. dubliniensis CD36 : Cd36_60540, C. parapsilosis CDC317 : CPAR2_602830, Candida tenuis NRRL Y-1498 : CANTEDRAFT_108530 and Debaryomyces hansenii CBS767 : DEHA2F15532g	1.16022	0.04497
orf19.1866_73	ORF19.1866	VMA10	Subunit G of the V1 peripheral membrane domain of the vacuolar H+-ATPase (V-ATPase); involved in vacuolar acidification; rat catheter biofilm repressed	1.1602	0.26409
orf19.318_1176	ORF19.318		Ortholog(s) have role in iron-sulfur cluster assembly and mitochondrial matrix localization	1.16016	0.01752
orf19.5842_517	ORF19.5842		Protein with predicted siroheme synthase middle domains NAD(P)-binding; Hap43-repressed gene	1.15997	0.22224
orf19.4767_462	ORF19.4767	ZCF28	Zn(II)2Cys6 transcription factor; required for yeast cell adherence to silicone substrate; Spider biofilm induced	1.15997	0.01151
orf19.7632_1340	ORF19.7632		Ortholog of C. dubliniensis CD36 : Cd36_35360, C. parapsilosis CDC317 : CPAR2_200320, Candida tenuis NRRL Y-1498 : CANTEDRAFT_136418 and Debaryomyces hansenii CBS767 : DEHA2A14080g	1.15993	0.1312
orf19.6321_83	ORF19.6321	PGA48	Putative GPI-anchored adhesin-like protein; similar to S. cerevisiae Spi1p, which is induced at stationary phase; transcript induced in high iron; flow model biofilm induced; Spider biofilm repressed	1.15989	0.12897
orf19.5211_933	ORF19.5211	IDP1	Putative isocitrate dehydrogenase; transcriptionally induced by interaction with macrophage; alkaline induced; Spider biofilm repressed	1.15971	7.03684e-05
orf19.3473_1321	ORF19.3473		Ortholog(s) have enzyme activator activity, histone acetyltransferase activity, structural molecule activity	1.15968	0.04736
orf19.7057_2034	ORF19.7057	GUS1	Putative glutamine-tRNA ligase; stationary phase enriched protein; Spider biofilm repressed	1.15965	0.02054
orf19.4728_3986	ORF19.4728		Ortholog(s) have role in histone deacetylation, negative regulation of meiosis and Set3 complex localization	1.15963	0.02016
orf19.3742_488	ORF19.3742		Protein of unknown function; Spider biofilm induced; upregulated in a cyr1 null mutant	1.15955	0.19554
orf19.285_328	ORF19.285		Ortholog of S. cerevisiae Igo2; role in mRNA stabilization of mRNA; Spider biofilm induced	1.15948	0.19773
orf19.7105_2120	ORF19.7105	FAR1	Protein involved in regulation of pheromone-mediated mating; repressed by A1p and Alpha2p in white-phase cells; null mutant shows no pheromone response in opaque cells; overexpression causes enhanced pheromone response and cell cycle arrest	1.15948	0.10821
orf19.6726_760	ORF19.6726		Ortholog(s) have DNA secondary structure binding activity	1.15939	0.08202
orf19.4601_1287	ORF19.4601		Putative RNA polymerase III transcription initiation factor complex (TFIIIC) subunit; possibly an essential gene, disruptants not obtained by UAU1 method	1.15933	0.3756
orf19.4775_2224	ORF19.4775	CTA8	Essential transcription factor, mediates heat shock transcriptional induction; in the absence of heat stress, Cta8p levels are modulated by growth temperature to regulate basal expression of genes involved in protein folding	1.15931	0.03025
orf19.2494_1397	ORF19.2494		Ortholog(s) have glutaminyl-tRNA synthase (glutamine-hydrolyzing) activity, role in glutaminyl-tRNAGln biosynthesis via transamidation, mitochondrial translation and glutamyl-tRNA(Gln) amidotransferase complex, mitochondrion localization	1.15928	0.00608
orf19.5730_1371	ORF19.5730		Putative phenylacrylic acid decarboxylase; clade-associated gene expression	1.15922	0.07921
orf19.3900_1480	ORF19.3900		Ortholog(s) have role in mitochondrial fusion and integral to mitochondrial outer membrane localization	1.15921	0.37651
orf19.4747_1484	ORF19.4747	HEM14	Putative protoporphyrinogen oxidase; involved in heme biosynthesis; predicted Kex2p substrate; iron regulated transcript; Yfh1-induced; Hap43-repressed; rat catheter biofilm repressed	1.15919	0.04029
orf19.3691_525	ORF19.3691	TIM21	Component of the Translocase of the Inner Mitochondrial membrane (TIM23 complex); for protein import into mitochondria; Hap43, ketoconazole-repressed; Spider biofilm repressed	1.15906	0.01277
orf19.4033_2794	ORF19.4033	PRP22	Putative RNA-dependent ATPase; induced upon adherence to polystyrene; induced by Mnl1p under weak acid stress	1.15904	0.06736
orf19.3625_864	ORF19.3625		Has domain(s) with predicted zinc ion binding activity	1.15888	0.01111
orf19.7356_113	ORF19.7356		Ortholog of C. parapsilosis CDC317 : CPAR2_807080, C. dubliniensis CD36 : Cd36_85690, Candida orthopsilosis Co 90-125 : CORT_0C02090 and Candida albicans WO-1 : CAWG_02885	1.15882	0.09477
orf19.3841_2405	ORF19.3841		Putative protein serine/threonine kinase; predicted role in vesicle formation in autophagy and the cytoplasm-to-vacuole targeting (Cvt) pathway; Spider biofilm induced	1.15867	0.09312
orf19.6136_838	ORF19.6136		Ortholog of S. cerevisiae Mrpl4, a mitochondrial ribosomal protein of the large subunit; repressed by nitric oxide	1.15864	0.0698
orf19.4768_1531	ORF19.4768		Protein of unknown function; Spider biofilm induced	1.15852	0.13762
orf19.1274_1259	ORF19.1274		Has domain(s) with predicted DNA binding, zinc ion binding activity, role in transcription, DNA-templated and nucleus localization	1.15841	0.05614
orf19.5912_2973	ORF19.5912	MAK21	Putative 66S pre-ribosomal particle subunit; mutation confers hypersensitivity to tubercidin (7-deazaadenosine)	1.15837	0.16515
orf19.3064.1_123	ORF19.3064.1		Ortholog of C. parapsilosis CDC317 : CPAR2_108915, Candida tenuis NRRL Y-1498 : CANTEDRAFT_102387, Debaryomyces hansenii CBS767 : DEHA2B06776g and Pichia stipitis Pignal : psti_CGOB_00149	1.15833	0.23066
orf19.4204_766	ORF19.4204		Ortholog(s) have structural constituent of ribosome activity and mitochondrial small ribosomal subunit localization	1.15833	0.06219
orf19.4799_1670	ORF19.4799	CEF1	Putative mRNA splicing factor; ortholog is essential in S. cerevisiae; Spider biofilm induced	1.15832	0.06042
orf19.3290_266	ORF19.3290		Plasma membrane-localized protein; repressed by nitric oxide; Hap43p-repressed gene	1.15829	0.07349
orf19.3743_888	ORF19.3743		Ortholog of C. dubliniensis CD36 : Cd36_27230, C. parapsilosis CDC317 : CPAR2_801320, Candida tenuis NRRL Y-1498 : CANTEDRAFT_113198 and Debaryomyces hansenii CBS767 : DEHA2E23782g	1.15826	0.08356
orf19.6143_1786	ORF19.6143		Predicted long-chain-alcohol oxidase; Spider biofilm induced	1.15826	0.06927
orf19.2733_1423	ORF19.2733		Putative subunit of phosphatidylinositol 3-kinase complexes I and II; transcription is activated in the presence of elevated CO2	1.15824	0.08001
orf19.3862_928	ORF19.3862		Putative intracellular transport protein; heterozygous null mutant displays sensitivity to rapamycin; expression upregulated during growth in the mouse cecum	1.15816	0.06417
orf19.5112_1888	ORF19.5112	TKL1	Putative transketolase; localizes to surface of yeast cells, not hyphae; soluble protein in hyphae; transcript regulated by Nrg1, Mig1, and Tup1; antigenic in human or murine infection; possibly essential (by UAU1 method)	1.15788	0.7689
orf19.6399_649	ORF19.6399	ATS1	Protein required for modification of wobble nucleosides in tRNA; induced upon adherence to polystyrene; regulated by Sef1, Sfu1, and Hap43	1.15775	0.05245
orf19.5949_5498	ORF19.5949	FAS2	Alpha subunit of fatty-acid synthase; required for virulence in mouse systemic infection and rat oropharyngeal infection models; regulated by Efg1; fluconazole-induced; amphotericin B repressed; flow model and Spider biofilm repressed	1.15758	0.32963
orf19.204_434	ORF19.204		Ortholog of C. dubliniensis CD36 : Cd36_23180, Candida tropicalis MYA-3404 : CTRG_01968 and Candida albicans WO-1 : CAWG_05983	1.15757	0.03687
orf19.6938_894	ORF19.6938	MEU1	Putative methylthioadenosine phosphorylase; protein level decreases in stationary phase cultures	1.15752	0.01162
orf19.7100_1680	ORF19.7100		Putative vacuolar transporter of large neutral amino acids; possibly transcriptionally regulated upon hyphal formation; not the true Avt1 ortholog of S. cerevisiae	1.15739	0.006
orf19.229_481	ORF19.229		Ortholog(s) have ubiquitin-protein ligase activity, role in protein ubiquitination involved in ubiquitin-dependent protein catabolic process and chromosome, centromeric region, mitotic spindle pole body, nucleus localization	1.15739	0.01812
orf19.3115_922	ORF19.3115		Protein of unknown function; rat catheter and Spider biofilm induced	1.15734	0.02692
orf19.1897_708	ORF19.1897		Ortholog of C. dubliniensis CD36 : Cd36_21640, C. parapsilosis CDC317 : CPAR2_105040, Candida tenuis NRRL Y-1498 : CANTEDRAFT_112352 and Debaryomyces hansenii CBS767 : DEHA2C08008g	1.15733	0.10619
orf19.5017_963	ORF19.5017	DUR32	Putative urea transporter; possibly an essential gene, disruptants not obtained by UAU1 method	1.15732	0.1483
orf19.1878_834	ORF19.1878	MED4	RNA polymerase II core mediator complex subunit	1.15724	0.05053
orf19.6573_6697	ORF19.6573	BEM2	Putative Rho1p GTPase activating protein (GAP); serum-induced transcript; Spider biofilm induced; flow model biofilm repressed	1.15711	0.00548
orf19.3897_1151	ORF19.3897		Protein of unknown function; decreased transcription is observed upon fluphenazine treatment or in an azole-resistant strain that overexpresses CDR1 and CDR2; transcription is repressed in response to alpha pheromone in SpiderM medium	1.15702	0.50575
orf19.640_568	ORF19.640		Integral membrane protein of the ER; role in the synthesis of beta-1,6-glucan in the cell wall; S. cerevisiae ortholog required for cell viability; Spider biofilm induced	1.157	0.52245
orf19.1164_259	ORF19.1164	GAR1	Putative H/ACA snoRNP pseudouridylase complex protein; mutation confers hypersensitivity to tubercidin (7-deazaadenosine); macrophage/pseudohyphal-induced; Spider biofilm repressed	1.15694	0.06199
orf19.7673_222	ORF19.7673		Ortholog(s) have mRNA binding activity, role in mRNA splicing, via spliceosome and U1 snRNP, U2-type prespliceosome, U4/U6 x U5 tri-snRNP complex, U5 snRNP, commitment complex, cytosol localization	1.15684	0.04914
orf19.7518_1469	ORF19.7518	ZCF38	Putative Zn(II)2Cys6 transcription factor	1.15681	0.0055
orf19.4054_67	ORF19.4054	CTA24	Putative transcription factor; positive regulator of gene expression; Efg1-repressed; member of a family of telomere-proximal genes; transcript upregulated in RHE model of oral candidiasis	1.15679	0.10168
orf19.854_1182	ORF19.854	UGA11	Putative gamma-aminobutyrate (GABA) transaminase; macrophage-induced; overlaps orf19.854.1, which is a region annotated as a blocked reading frame; Spider biofilm induced	1.15675	0.11399
orf19.1392_2000	ORF19.1392		Ortholog(s) have chaperone binding, protein disulfide isomerase activity, unfolded protein binding activity and role in ER-associated ubiquitin-dependent protein catabolic process, protein retention in ER lumen	1.15666	0.05558
orf19.7118_607	ORF19.7118		Ortholog(s) have adenylate kinase activity, nucleoside triphosphate adenylate kinase activity, role in nucleotide metabolic process and mitochondrial inner membrane localization	1.1566	0.05856
orf19.1386_349	ORF19.1386		Ortholog(s) have SNAP receptor activity and role in ER to Golgi vesicle-mediated transport, retrograde vesicle-mediated transport, Golgi to ER, vesicle fusion	1.15653	0.29555
orf19.703_680	ORF19.703		Ortholog(s) have 2',3'-cyclic-nucleotide 3'-phosphodiesterase activity, role in cyclic nucleotide metabolic process and clathrin-coated vesicle localization	1.15642	0.10346
orf19.5316_840	ORF19.5316	FGR29	Protein lacking an ortholog in S. cerevisiae; transposon mutation affects filamentous growth; rat catheter biofilm repressed	1.15639	0.10128
orf19.488_1681	ORF19.488	MEX67	Nuclear export protein; has NTF2-like domain; interacts with Mtr2p via the NTF2-like domain	1.15626	0.00681
orf19.2709_1225	ORF19.2709	ZUO1	Ortholog of S. cerevisiae Zuo1; a cytosolic ribosome-associated chaperone; likely to be essential for growth, based on an insertional mutagenesis strategy; Spider biofilm repressed	1.15618	0.01494
orf19.4615_895	ORF19.4615		Ortholog(s) have histone deacetylase activity	1.15611	0.5868
orf19.4105_824	ORF19.4105		Ortholog(s) have role in DNA repair, DNA replication checkpoint, establishment of mitotic sister chromatid cohesion, maintenance of DNA repeat elements, meiotic chromosome segregation, replication fork arrest, replication fork protection	1.15608	0.0319
orf19.5967_1099	ORF19.5967	FGR44	Protein lacking an ortholog in S. cerevisiae; transposon mutation affects filamentous growth	1.15608	0.16574
orf19.7378_124	ORF19.7378		Ortholog(s) have phosphopantothenoylcysteine decarboxylase activity, protein phosphatase inhibitor activity and role in regulation of mitotic cell cycle, response to salt stress	1.15603	0.35043
orf19.991_1124	ORF19.991	DJP1	Similar to bacterial DnaJ; reported to have a role in peroxisome biogenesis; induced in low iron and upon adherence to polystyrene	1.15586	0.02448
orf19.2043_841	ORF19.2043		Ortholog of C. dubliniensis CD36 : Cd36_15750, C. parapsilosis CDC317 : CPAR2_213000, Debaryomyces hansenii CBS767 : DEHA2D18524g and Pichia stipitis Pignal : PICST_42355	1.15583	0.06353
orf19.6374_929	ORF19.6374		Ortholog(s) have unfolded protein binding activity, role in mitochondrial proton-transporting ATP synthase complex assembly and integral to mitochondrial membrane, mitochondrial inner membrane localization	1.15578	0.01137
orf19.5424_379	ORF19.5424		Ortholog of Candida albicans WO-1 : CAWG_02376	1.15576	0.05107
orf19.7420_715	ORF19.7420		Ortholog(s) have RNA polymerase II transcription coactivator activity involved in preinitiation complex assembly activity	1.15571	0.05499
orf19.6053_1665	ORF19.6053	CIS2	Putative role in regulation of biogenesis of the cell wall; upregulated in biofilm; Gcn4p-regulated	1.1557	0.27858
orf19.528_2778	ORF19.528	SEC26	Secretory vesicles coatomer complex protein	1.15565	0.03755
orf19.498_1327	ORF19.498		Putative mitochondrial ribosomal component of the small subunit; possibly an essential gene, disruptants not obtained by UAU1 method; Spider biofilm repressed	1.15554	0.061
orf19.7064_2332	ORF19.7064	GLN4	Putative tRNA-Gln synthetase; genes encoding ribosomal subunits, translation factors, tRNA synthetases are downregulated upon phagocytosis by murine macrophage; protein present in exponential and stationary growth phase yeast cultures	1.15553	0.03912
orf19.4602_640	ORF19.4602	MDH1-1	Predicted malate dehydrogenase precursor; macrophage-induced transcript; protein present in exponential and stationary growth phase yeast cultures; Spider biofilm repressed	1.15551	0.12547
orf19.2704_64	ORF19.2704		Ortholog of Candida albicans WO-1 : CAWG_03507	1.15549	0.26319
orf19.7544_167	ORF19.7544	TLO1	Member of a family of telomere-proximal genes of unknown function; hypha-induced expression; rat catheter biofilm repressed	1.15547	0.02986
orf19.185_892	ORF19.185		Ortholog(s) have structural constituent of ribosome activity, role in mitochondrial translational initiation and mitochondrial small ribosomal subunit localization	1.1554	0.01452
orf19.6943_192	ORF19.6943		Predicted ORF from Assembly 19; removed from Assembly 20; subsequently reinstated in Assembly 21 based on comparative genome analysis	1.15534	0.23891
orf19.2598_532	ORF19.2598	VMA4	H+ transporting ATPase E chain; transcript regulated by Mig1; caspofungin repressed; protein level decreases in stationary phase cultures; rat catheter biofilm repressed	1.15534	0.31247
orf19.318_927	ORF19.318		Ortholog(s) have role in iron-sulfur cluster assembly and mitochondrial matrix localization	1.15532	0.11045
orf19.2534_2388	ORF19.2534	PIN4	Protein with similarity to S. cerevisiae Pin4p; transposon mutation affects filamentous growth	1.15532	0.07051
orf19.1687_2206	ORF19.1687		Ortholog of S. cerevisiae Prp43, an RNA helicase in the DEAH-box family that functions in both RNA polymerase I and polymerase II transcript metabolism; Hap43-induced gene	1.15522	0.04893
orf19.6167_586	ORF19.6167	AYR1	Putative oxidoreductase; transcriptionally induced by interaction with macrophage; rat catheter biofilm repressed	1.1552	0.08101
orf19.2068_1451	ORF19.2068		Ortholog of C. dubliniensis CD36 : Cd36_15550, C. parapsilosis CDC317 : CPAR2_213190, Candida tenuis NRRL Y-1498 : CANTEDRAFT_119026 and Debaryomyces hansenii CBS767 : DEHA2G08514g	1.15507	0.00338
orf19.7083_816	ORF19.7083	DCC1	Protein with a predicted role in sister chromatid cohesion and telomere length maintenance; cell-cycle regulated periodic mRNA expression	1.15495	0.0241
orf19.2214_805	ORF19.2214		Ortholog(s) have structural constituent of ribosome activity and mitochondrial large ribosomal subunit localization	1.1549	0.03763
orf19.1547_604	ORF19.1547		Ortholog(s) have double-stranded DNA binding, polynucleotide 3'-phosphatase activity and role in double-strand break repair	1.15483	0.36642
orf19.1281_543	ORF19.1281		Putative splicing factor required for the first step of pre-mRNA splicing; Spider biofilm induced	1.15473	0.09154
orf19.867_1550	ORF19.867		Ortholog(s) have superoxide-generating NADPH oxidase activity, role in apoptotic process, regulation of actin cytoskeleton organization and perinuclear endoplasmic reticulum, ribosome localization	1.15466	0.08908
orf19.1453_2789	ORF19.1453	SPT5	Protein similar to S. cerevisiae Spt5p transcription elongation factor; transposon mutation affects filamentous growth	1.15453	0.15669
orf19.2956_535	ORF19.2956	MGM101	Putative mitochondrial genome maintenance protein; fungal-specific (no human or murine homolog); mutation confers hypersensitivity to tubercidin (7-deazaadenosine)	1.15431	0.07254
orf19.4438_1293	ORF19.4438	RME1	Zinc finger protein; controls meiosis in S. cerevisae; white-specific transcript; upregulation correlates with clinical development of fluconazole resistance; Upc2-regulated in hypoxia; flow model biofilm induced; Spider biofilm repressed	1.1543	0.50465
orf19.310_1277	ORF19.310		Putative mitochondrial protein with a predicted role in cell wall biogenesis; possibly an essential gene, disruptants not obtained by UAU1 method	1.15427	0.03047
orf19.7420_397	ORF19.7420		Ortholog(s) have RNA polymerase II transcription coactivator activity involved in preinitiation complex assembly activity	1.15422	0.09108
orf19.7212_2236	ORF19.7212		Phosphorylated protein; homozygous transposon insertion causes decreased colony wrinkling in filamentous growth-inducing conditions, but does not block hyphal formation in liquid media; Hap43-repressed	1.15417	0.02477
orf19.2105_362	ORF19.2105		Putative pre-mRNA-splicing factor; possibly an essential gene, disruptants not obtained by UAU1 method	1.15413	0.04478
orf19.3042_766	ORF19.3042		Protein of unknown function; Hap43-induced; rat catheter biofilm induced	1.15398	0.23764
orf19.3655_1608	ORF19.3655		Ortholog of C. dubliniensis CD36 : Cd36_60640, C. parapsilosis CDC317 : CPAR2_602930, Candida tenuis NRRL Y-1498 : CANTEDRAFT_115038 and Pichia stipitis Pignal : PICST_31932	1.15392	0.10229
orf19.1409_1662	ORF19.1409	VAC7	Ortholog of S. cerevisiae Vac7; integral vacuolar membrane protein involved in vacuole inheritance and morphology; mutants are viable	1.1539	0.49474
orf19.7291_949	ORF19.7291		Ortholog(s) have tRNA (adenine-N1-)-methyltransferase activity, role in tRNA methylation and cytosol, nucleus, tRNA (m1A) methyltransferase complex localization	1.15389	0.16126
orf19.6848_2304	ORF19.6848	VPS16	Protein similar to S. cerevisiae Vps16p, which is involved in protein-vacuolar targeting; likely to be essential for growth, based on insertional mutagenesis; downregulated in biofilm or in azole-resistant strain that overexpresses MDR1	1.15387	0.0922
orf19.10_1208	ORF19.10	ALK8	Alkane-inducible cytochrome P450; catalyzes hydroxylation of lauric acid to hydroxylauric acid; overproduction causes fluconazole resistance in WT and causes multidrug resistance in a cdr1 cdr2 double mutant; rat catheter biofilm repressed	1.15383	0.73455
orf19.1634_892	ORF19.1634		Has domain(s) with predicted fatty-acyl-CoA binding activity	1.15382	0.03406
orf19.2820_1585	ORF19.2820		Ortholog(s) have nucleocytoplasmic transporter activity, structural constituent of nuclear pore activity	1.15378	0.06864
CaalfMp08.4_1153	CaalfMp08.4		Putative endonuclease encoded by the first four exons and part of the fourth intron of the mitochondrial COX1 gene; C-terminus contains a LAGLIDADG domain found in intron-encoded endonucleases; conserved in fungal mitochondria	1.15373	0.17778
orf19.6469_2366	ORF19.6469		Predicted ORF in retrotransposon Tca11 with similarity to the Gag-Pol region of retrotransposons, which encodes nucleocapsid-like protein, reverse transcriptase, protease, and integrase	1.1537	0.05562
orf19.5450_947	ORF19.5450	ETR1	Putative 2-enoyl thioester reductase; protein present in exponential and stationary growth phase yeast cultures; rat catheter biofilm repressed	1.15358	0.02218
orf19.1935_18	ORF19.1935		Dubious open reading frame	1.15354	0.02871
orf19.2919_3490	ORF19.2919	MPH1	Protein similar to S. cerevisiae Mph1p, which is a DNA helicase involved in DNA repair; induced under hydroxyurea treatment	1.15354	0.00156
orf19.6382_4071	ORF19.6382		Putative MRP/CFTR-subfamily ABC transporter; member of multidrug resistance-associated protein (MRP) subfamily of ABC family; similar to S. cerevisiae Bpt1p	1.15342	0.02668
orf19.2042_1331	ORF19.2042		Ortholog(s) have role in mitochondrial tRNA wobble uridine modification and mitochondrial inner membrane localization	1.15332	0.34084
CaalfMp08.3_1474	CaalfMp08.3		Putative endonuclease encoded by the first three exons and part of the third intron of the mitochondrial COX1 gene; C-terminus contains a LAGLIDADG domain found in intron-encoded endonucleases; conserved in fungal mitochondria	1.15331	0.33818
orf19.6011_3997	ORF19.6011	SIN3	Protein similar to S. cerevisiae Sin3p (transcriptional corepressor involved in histone deacetylase recruitment); has paired amphipathic helix PAH1 domain; interacts with ScOpi1p, not CaOpi1p; transposon mutation affects filamentous growth	1.15324	0.45546
orf19.857_1589	ORF19.857	FMO2	Protein with a monooxygenase domain; Spider biofilm induced	1.15318	0.38567
orf19.5250_341	ORF19.5250		Has domain(s) with predicted cofactor binding activity	1.15311	0.0479
orf19.7064_1852	ORF19.7064	GLN4	Putative tRNA-Gln synthetase; genes encoding ribosomal subunits, translation factors, tRNA synthetases are downregulated upon phagocytosis by murine macrophage; protein present in exponential and stationary growth phase yeast cultures	1.15303	0.04399
orf19.7507_375	ORF19.7507		Ortholog of C. dubliniensis CD36 : Cd36_25310, Pichia stipitis Pignal : PICST_30877, Candida tropicalis MYA-3404 : CTRG_01053 and Candida lusitaniae ATCC 42720 : CLUG_02644	1.15301	0.07479
orf19.6517_862	ORF19.6517	RAD14	Putative DNA repair protein; transcription is regulated upon yeast-hyphal switch; flucytosine repressed	1.15298	0.03749
orf19.6536_4833	ORF19.6536	IQG1	Actomyosin ring component at bud neck; cell-cycle regulated ser phosphorylation at CDK sites regulate association with Bni1/Bnr1, Iqg1 degradation, and ring disassembly; mutation causes cytokinetic defects; rat catheter biofilm repressed	1.15283	0.10555
orf19.6830_631	ORF19.6830		Putative enoyl-CoA hydratase; Spider biofilm induced	1.15273	0.0818
orf19.5666_21	ORF19.5666		Ortholog(s) have transcription coactivator activity	1.15271	0.08839
orf19.4379_2452	ORF19.4379	PRP13	Putative integral inner mitochondrial membrane protein with similarity to exonucleases	1.1527	0.00036
orf19.6189_655	ORF19.6189		Chalcone related protein family; flow model biofilm induced	1.15264	0.02185
orf19.7513_1096	ORF19.7513	ALK2	N-Alkane inducible cytochrome P450	1.15264	0.09137
orf19.4952.1_296	ORF19.4952.1		Ortholog(s) have FK506 binding, Hsp70 protein binding, chaperone binding, peptidyl-prolyl cis-trans isomerase activity, role in protein complex assembly and cytoplasm, nucleus localization	1.15259	0.10484
orf19.7325_607	ORF19.7325	SCO1	Putative copper transporter; Hap43p-repressed gene	1.15259	0.10599
orf19.1274_1562	ORF19.1274		Has domain(s) with predicted DNA binding, zinc ion binding activity, role in transcription, DNA-templated and nucleus localization	1.15257	0.28841
orf19.291_862	ORF19.291		Ortholog(s) have role in cellular response to DNA damage stimulus, protein sumoylation, response to UV-B, response to UV-C and nuclear envelope localization	1.15254	0.16371
orf19.5525_837	ORF19.5525		Putative oxidoreductase; protein levels affected by URA3 expression in CAI-4 strain background; Efg1, Efh1 regulated; Rgt1-repressed; protein present in exponential and stationary growth phase yeast; rat catheter biofilm repressed	1.15249	0.00376
orf19.5016_307	ORF19.5016		Ortholog(s) have role in cellular response to UV and cytosol, nucleus localization	1.15244	0.47621
orf19.3148_2280	ORF19.3148		Protein of unknown function; possibly an essential gene, disruptants not obtained by UAU1 method	1.15234	0.09874
orf19.6941_1674	ORF19.6941		Putative diacylglycerol acyltransferase; catalyzes the terminal step of triacylglycerol formation; flow model biofilm induced; Spider biofilm induced	1.15224	0.29889
orf19.5335_3299	ORF19.5335	SGS1	RecQ-related DNA helicase; Bloom's syndrome-related gene; haploinsufficient for wild-type lifespan; upregulated in farnesol treated biofilm	1.15214	0.01739
orf19.2057_2264	ORF19.2057		Ortholog(s) have ATP binding, ATPase activity, metallopeptidase activity, role in protein complex assembly, proteolysis, signal peptide processing and m-AAA complex, mitochondrial inner boundary membrane localization	1.15213	0.02122
orf19.6747_796	ORF19.6747		Ortholog(s) have acid phosphatase activity, role in dephosphorylation, intracellular sterol transport and cytoplasm, nucleus localization	1.15199	0.03569
orf19.6337_77	ORF19.6337	TLO13	Member of a family of telomere-proximal genes of unknown function; may be spliced in vivo; overlaps orf19.6337.1, which is a region annotated as blocked reading frame	1.15184	0.00604
orf19.2305_164	ORF19.2305		Ortholog(s) have tubulin binding activity, role in tubulin complex assembly and prefoldin complex localization	1.15183	0.07093
orf19.7331_1507	ORF19.7331	FCY24	Putative transporter; more similar to S. cerevisiae Tpn1, which is a vitamin B6 transporter, than to purine-cytosine permeases; transcription is regulated by Nrg1; Spider biofilm induced	1.15181	0.03928
orf19.171_1519	ORF19.171	DBP2	Putative DEAD-box family ATP-dependent RNA helicase; flucytosine induced; repressed in core stress response	1.15171	0.31204
orf19.5064.1_95	ORF19.5064.1		Ortholog of C. dubliniensis CD36 : Cd36_07450, C. parapsilosis CDC317 : CPAR2_208450, Candida tenuis NRRL Y-1498 : CANTEDRAFT_116488 and Debaryomyces hansenii CBS767 : DEHA2F26114g	1.15162	0.15274
orf19.3559_873	ORF19.3559		S. cerevisiae ortholog Mrps35p is a structural constituent of ribosome and localizes to mitochondrial small ribosomal subunit; the snoRNA CD39 is encoded within the MRPS35 intron	1.15152	0.06553
orf19.520_1062	ORF19.520		Ortholog of C. dubliniensis CD36 : Cd36_29660, C. parapsilosis CDC317 : CPAR2_205200, Candida tenuis NRRL Y-1498 : CANTEDRAFT_96118 and Debaryomyces hansenii CBS767 : DEHA2F21428g	1.15146	0.24585
orf19.5177_940	ORF19.5177		Ortholog of Candida albicans WO-1 : CAWG_05627	1.1514	0.2904
orf19.4368_1989	ORF19.4368		Has domain(s) with predicted hydrolase activity and role in cellular process	1.15139	0.08001
orf19.7624_1411	ORF19.7624		Ortholog(s) have role in rRNA processing and 90S preribosome, nucleolus localization	1.15139	0.40355
orf19.3399_2155	ORF19.3399		Ortholog(s) have histone binding activity, role in histone exchange and Swr1 complex, cytoplasm localization	1.1513	0.10442
orf19.978_1059	ORF19.978	BDF1	Bromodomain transcription factor; repressed upon adherence to polystyrene; reduced mRNA abundance detected in null mutant; macrophage/pseudohyphal-repressed; possibly essential, disruptants not obtained by UAU1 method	1.15116	0.03273
orf19.557_217	ORF19.557		Protein of unknown function; Hap43-repressed; Spider biofilm repressed	1.1511	0.36112
orf19.6135_1002	ORF19.6135		Ortholog of C. dubliniensis CD36 : Cd36_32970, C. parapsilosis CDC317 : CPAR2_701710, Candida tenuis NRRL Y-1498 : CANTEDRAFT_106599 and Debaryomyces hansenii CBS767 : DEHA2E04488g	1.151	0.01228
orf19.4869_1415	ORF19.4869	SFU1	GATA-type transcription factor; regulator of iron-responsive genes; represses iron utilization genes if iron is present; Hap43-repressed; promotes gastrointestinal commensalism in mice; Spider biofilm induced	1.15092	0.18945
orf19.2077_2321	ORF19.2077	ZCF9	Putative Zn(II)2Cys6 transcription factor; hypersensitive to toxic ergosterol analog ECC69 and/or ECC1384	1.15092	0.05737
orf19.2743_1759	ORF19.2743		Ortholog(s) have RNA polymerase II core promoter proximal region sequence-specific DNA binding transcription factor activity involved in negative regulation of transcription, more	1.15088	0.08336
orf19.7673_91	ORF19.7673		Ortholog(s) have mRNA binding activity, role in mRNA splicing, via spliceosome and U1 snRNP, U2-type prespliceosome, U4/U6 x U5 tri-snRNP complex, U5 snRNP, commitment complex, cytosol localization	1.15083	0.01045
orf19.393_312	ORF19.393	APS3	Component of the adaptor complex AP-3, which is involved in vacuolar protein sorting	1.15083	0.24623
orf19.680_877	ORF19.680	TIM50	Predicted component of the Translocase of the Inner Mitochondrial membrane (TIM23 complex); involved in mitochondrial protein import; Spider biofilm repressed	1.15068	0.1702
orf19.4471_1948	ORF19.4471		Ortholog(s) have role in protein targeting to vacuole, re-entry into mitotic cell cycle after pheromone arrest and endoplasmic reticulum membrane localization	1.15067	0.07318
orf19.4921_1873	ORF19.4921		Ortholog of C. dubliniensis CD36 : Cd36_12030 and Candida albicans WO-1 : CAWG_00152	1.15064	0.28609
orf19.3629_1762	ORF19.3629	DSE1	Essential cell wall protein involved in cell wall integrity and rigidity; periodic mRNA expression peaks at M/G1 phase; Ace2p-induced; required for virulence in a mouse model of infection	1.15061	0.36531
orf19.1135_2328	ORF19.1135	CAS1	Putative transcription factor with Ku70/Ku80 beta-barrel DNA-binding motif; involved in telomerase regulation and telomere protection; mutation causes marginal increase in caspofungin sensitivity	1.15045	0.04986
orf19.6909_336	ORF19.6909		Ortholog(s) have TFIIH-class transcription factor binding, TFIIH-class transcription factor recruiting transcription factor activity	1.15044	0.1131
orf19.2041_967	ORF19.2041		Ortholog(s) have DNA translocase activity, histone acetyl-lysine binding activity	1.15024	0.06087
orf19.2769_325	ORF19.2769		Putative protease B inhibitor; hyphal-induced expression; Cyr1p- and Ras1p-repressed	1.15024	0.41988
orf19.3626_2053	ORF19.3626		Ortholog(s) have cytosol, nucleus localization	1.15022	0.0389
orf19.2156_625	ORF19.2156	NAG1	Glucosamine-6-phosphate deaminase; required for normal hyphal growth and mouse virulence; converts glucosamine 6-P to fructose 6-P; reversible reaction in vitro; gene and protein is GlcNAc-induced; Spider biofilm induced	1.15021	0.12238
orf19.4229_436	ORF19.4229		Putative polyphosphate phosphatase; role in hydrolysis of diphosphorylated inositol polyphosphates and diadenosine polyphosphates; Spider biofilm induced	1.15008	0.3264
orf19.7506_1132	ORF19.7506		Ortholog(s) have ATPase activity, DNA binding, nucleosome binding activity, role in chromatin remodeling and Isw1 complex localization	1.15007	0.16323
orf19.2884_2969	ORF19.2884	CDC68	Functional homolog of S. cerevisiae Cdc68, a transcription elongation factor; essential; possible drug target	1.14993	0.07702
orf19.4369_3348	ORF19.4369		Ortholog of S. cerevisiae Spp41; protein involved in negative regulation of expression of spliceosome components PRP4 and PRP3 in S. cerevisiae; mutants are viable	1.14987	0.02013
orf19.1981_388	ORF19.1981	IMP2	Predicted subunit of the mitochondrial inner membrane peptidase complex involved in protein targeting to mitochondria	1.14985	0.03248
orf19.900_1925	ORF19.900	NSP1	Essential component of the nuclear pore complex; sumoylation target; stationary phase enriched protein; rat catheter biofilm repressed	1.14984	0.07986
orf19.3823_4694	ORF19.3823	ZDS1	Nonessential protein; similar to S. cerevisiae Zds1p	1.1498	0.04342
orf19.1422_2429	ORF19.1422	FZO1	Mitochondrial biogenesis protein; rat catheter and Spider biofilm induced	1.1497	0.23903
orf19.4502_5665	ORF19.4502		Ortholog(s) have ATPase activity, DNA binding, TBP-class protein binding activity	1.14959	0.04076
orf19.2347_1618	ORF19.2347	MNN2	Alpha-1,2-mannosyltransferase; similar to S. cerevisiae Mnn2; role in cell wall integrity, temperature sensitivity; iron utilization in low iron; Tn mutation affects filamentous growth; filament induced; increased chitin exposes beta-glucan	1.14957	0.02384
orf19.4601_1396	ORF19.4601		Putative RNA polymerase III transcription initiation factor complex (TFIIIC) subunit; possibly an essential gene, disruptants not obtained by UAU1 method	1.14953	0.153
orf19.4031_1892	ORF19.4031		Ortholog(s) have cytoplasm localization	1.14945	0.03739
orf19.5846_1357	ORF19.5846		Putative TFIIH and nucleotide excision repair factor 3 complex subunit; possibly an essential gene, disruptants not obtained by UAU1 method	1.14939	0.15834
orf19.4170_720	ORF19.4170	CSP2	Putative cell wall associated protein; C. albicans and C. dubliniensis specific gene highly induced during chlamydospore development in both species; localized to chlamydospore cell wall; Hap43-repressed; Spider biofilm induced	1.14931	0.05053
orf19.6947_560	ORF19.6947	GTT11	Glutathione S-transferase, localized to ER; induced in exponentially growing cells, under oxidative stress; induced by nitric oxide; Spider biofilm induced	1.14929	0.03902
orf19.6500_898	ORF19.6500	ECM42	Ornithine acetyltransferase; Gcn2, Gcn4-regulated; clade-specific gene expression; possibly essential gene, disruptants not obtained by UAU1 method; Spider biofilm induced	1.14928	0.09167
orf19.4193_52	ORF19.4193		Ortholog(s) have Arp2/3 complex binding activity, role in actin cortical patch assembly, actin filament debranching, negative regulation of Arp2/3 complex-mediated actin nucleation and actin cortical patch, cytosol, nucleus localization	1.14923	0.01886
orf19.7264_748	ORF19.7264		Metalloprotease subunit of the 19S regulatory particle of the 26S proteasome lid; couples the deubiquitination and degradation of proteasome substrates; role in fission of mitochondria and peroxisome; Spider biofilm repressed	1.14895	0.04351
orf19.427_4931	ORF19.427		Ortholog(s) have telomeric DNA binding activity and role in chromatin silencing at silent mating-type cassette, chromatin silencing at telomere, single-species biofilm formation on inanimate substrate, telomere capping	1.14877	0.02363
orf19.1824_871	ORF19.1824	PGA50	Putative GPI-anchored protein; adhesin-like protein	1.14871	0.23969
orf19.2281_1313	ORF19.2281		Ortholog(s) have mitochondrion localization	1.1487	0.03201
orf19.1393_875	ORF19.1393		Ortholog(s) have NAD transporter activity, pyruvate secondary active transmembrane transporter activity, role in NAD transmembrane transport, mitochondrial pyruvate transport and endoplasmic reticulum, mitochondrion localization	1.14865	0.06661
orf19.3679_302	ORF19.3679		Putative protein of unknown function; stationary phase enriched protein	1.14865	0.27858
orf19.1867_1066	ORF19.1867		Putative malate permease; induced during macrophage infection; regulated by Gcn2 and Gcn4; putative peroxisome targeting signal; Hap43-repressed; Spider biofilm induced	1.14853	0.02016
orf19.3735_634	ORF19.3735		Protein of unknown function; induced by alpha pheromone in SpiderM medium	1.1485	0.62937
orf19.2044_1399	ORF19.2044	PGA27	Putative GPI-anchored protein	1.1485	0.00313
orf19.6821_2319	ORF19.6821		Ortholog(s) have ubiquitin-protein ligase activity	1.14845	0.00292
orf19.5196_328	ORF19.5196	ESS1	Prolyl isomerase (parvulin class); essential; involved in yeast-hyphal switching, Cph1p pathway; has inflexible linker between WW and isomerase domains, unlike human homolog; functional homolog of S. cerevisiae Ess1p	1.14842	0.0749
orf19.6776_1426	ORF19.6776	GCD2	Putative translation initiation factor; genes encoding ribosomal subunits, translation factors, and tRNA synthetases are downregulated upon phagocytosis by murine macrophage	1.14838	0.0683
orf19.4716_1196	ORF19.4716	GDH3	NADP-glutamate dehydrogenase; Nrg1, Plc1 regulated; hypha, hypoxia, Efg1-repressed; Rim101-induced at pH 8; GlcNAc, ciclopirox, ketoconazole induced; exp and stationary phase protein; Spider biofilm repressed; rat catheter biofilm induced	1.14836	0.15304
orf19.1513_7121	ORF19.1513	FAB1	Phosphatidylinositol 3-phosphate 5-kinase; required for hyphal growth on solid media, and for wild-type vacuolar morphology and acidification; not required for wild-type virulence in mouse systemic infection or for adherence to HeLa cells	1.14833	0.05165
orf19.1448_436	ORF19.1448	APT1	Adenine phosphoribosyltransferase; flucytosine induced; repressed by nitric oxide; protein level decreased in stationary phase yeast cultures	1.14832	0.03388
orf19.2077_2233	ORF19.2077	ZCF9	Putative Zn(II)2Cys6 transcription factor; hypersensitive to toxic ergosterol analog ECC69 and/or ECC1384	1.14828	0.10477
orf19.6649_1529	ORF19.6649	BRF1	Component of the general transcription factor for RNA polymerase III (TFIIIB); possibly an essential gene, disruptants not obtained by UAU1 method	1.14784	0.02162
orf19.5246_1022	ORF19.5246		Protein of unknown function; Hap43-repressed gene	1.14783	0.03535
orf19.962_375	ORF19.962		Protein with a fungal RNA polymerase I subunit RPA14 domain; proposed to play a role in the recruitment of pol I to the promoter; Hap43-induced gene	1.14783	0.2317
orf19.6148_2800	ORF19.6148		Homolog of nuclear distribution factor NudE, NUDEL; regulates dynein targeting to microtubule plus ends; flow model biofilm repressed	1.14781	0.00404
orf19.2111_1002	ORF19.2111		Ortholog(s) have core RNA polymerase II binding transcription factor activity and role in transcription elongation from RNA polymerase II promoter, transcriptional start site selection at RNA polymerase II promoter	1.14781	0.19495
orf19.5198_2077	ORF19.5198	NOP4	Putative nucleolar protein; Hap43-induced; mutation confers hypersensitivity to 5-fluorocytosine (5-FC), 5-fluorouracil (5-FU), and tubercidin (7-deazaadenosine); represses in core stress response	1.1477	0.11032
orf19.5681_676	ORF19.5681		Ortholog of C. dubliniensis CD36 : Cd36_50190, C. parapsilosis CDC317 : CPAR2_302680, Candida tenuis NRRL Y-1498 : CANTEDRAFT_109949 and Debaryomyces hansenii CBS767 : DEHA2G00814g	1.14762	0.03708
orf19.5241_2942	ORF19.5241	SNT1	Ortholog of S. cerevisiae Snt1; an NAD-independent histone deacetylase; heterozygous transposon mutation affects filamentous growth; null mutants are viable	1.14743	0.09148
orf19.5426_2091	ORF19.5426		Putative patatin-like phospholipase; macrophage-regulated gene; fungal-specific (no human or murine homolog)	1.14733	0.04051
orf19.6345_2726	ORF19.6345	RPG1A	Putative translation initiation factor; mutation confers hypersensitivity to roridin A and verrucarin A; repressed upon phagocytosis by murine macrophage; Spider biofilm repressed	1.14733	0.14408
orf19.6686_2194	ORF19.6686	ENP2	Putative nucleolar protein; essential; heterozygous mutation confers resistance to 5-fluorocytosine (5-FC), 5-fluorouracil (5-FU), and tubercidin (7-deazaadenosine); Hap43-induced; Spider biofilm induced	1.14731	0.31505
orf19.484_881	ORF19.484	MRPL40	Putative mitochondrial ribosomal protein; Spider biofilm repressed	1.14731	0.06181
orf19.5438_66	ORF19.5438		Putative ubiquitin-protein ligase; role in protein sumoylation, protein ubiquitination; Spider biofilm induced	1.14723	0.1236
orf19.2173_967	ORF19.2173	MAF1	Putative negative regulator of RNA polymerase III; decreased expression in hyphae vs yeast cells; caspofungin repressed; Spider biofilm repressed	1.14723	0.50761
orf19.4044_523	ORF19.4044	MUM2	Protein similar to S. cerevisiae Mum2, a protein essential for meiotic DNA replication and sporulation; induced by alpha pheromone in SpiderM medium; transcript regulated by Tup1	1.1472	0.07051
orf19.1825_2007	ORF19.1825		Protein of unknown function; mutants are viable; filament induced; regulated by Nrg1, Rfg1, Tup1	1.14711	0.25765
orf19.7285_939	ORF19.7285		Ortholog(s) have role in mRNA cleavage, mRNA polyadenylation, snoRNA 3'-end processing, termination of RNA polymerase II transcription, exosome-dependent, termination of RNA polymerase II transcription, poly(A)-coupled	1.14708	0.08906
orf19.5678_1397	ORF19.5678		Has domain(s) with predicted role in peptidyl-diphthamide biosynthetic process from peptidyl-histidine and cytoplasm localization	1.14705	0.04415
orf19.1179_274	ORF19.1179		Protein of unknown function; induced in high iron; possibly subject to Kex2 processing; Hap43-repressed	1.14703	0.00763
orf19.4542_1045	ORF19.4542		Ortholog(s) have cyclin-dependent protein serine/threonine kinase inhibitor activity and role in phosphorylation of RNA polymerase II C-terminal domain, regulation of mitotic cell cycle, transcription from RNA polymerase II promoter	1.1469	0.00498
orf19.1624_1454	ORF19.1624		Non-catalytic subunit of N-terminal acetyltransferase of the NatC type; flow model biofilm repressed	1.14688	0.19421
orf19.6745_425	ORF19.6745	TPI1	Triose-phosphate isomerase; antigenic in mouse/human; mutation affects filamentation; macrophage-repressed; protein in exponential and stationary growth phase yeast; possibly essential; flow model biofilm induced; Spider biofilm repressed	1.14679	0.06721
orf19.7084_948	ORF19.7084	DFI1	Cell-surface associated glycoprotein; promotes activation of Cek1 in a matrix-dependent manner; N-glycosylated; Spider biofilm induced	1.14675	0.065
orf19.3759_1250	ORF19.3759		Putative elongator complex subunit; for modification of wobble nucleosides in tRNA; Spider biofilm induced	1.14666	0.37886
orf19.76_2435	ORF19.76	SPB1	Putative AdoMet-dependent methyltransferase; Hap43-induced; repressed by prostaglandins; possibly essential gene, disruptants not obtained by UAU1 method; Spider biofilm induced	1.14661	0.12794
orf19.5045_890	ORF19.5045	PTP2	Predicted protein tyrosine phosphatase; involved in regulation of MAP kinase Hog1 activity; induced by Mnl1 under weak acid stress; rat catheter and Spider biofilm induced	1.14658	0.90344
orf19.6742_2140	ORF19.6742		Ortholog(s) have CTD phosphatase activity	1.14654	0.07749
orf19.6754_462	ORF19.6754		Protein of unknown function; Spider biofilm induced	1.14653	0.03963
orf19.2385_623	ORF19.2385	KTI12	Protein similar to S. cerevisiae Kti12p, which associates with Elongator complex; has a role in resistance to killer toxin; predicted Kex2p substrate; Hap43p-induced gene	1.14649	0.09246
orf19.719_1540	ORF19.719		Ortholog(s) have ubiquitin-protein ligase activity	1.14645	0.04599
orf19.4607_1246	ORF19.4607		Possible Golgi membrane protein; Hap43-repressed; hypha induced; flow model biofilm induced; Spider biofilm induced	1.14638	0.07196
orf19.4195.1_394	ORF19.4195.1	FCA1	Cytosine deaminase; enzyme of pyrimidine salvage; functional homolog of S. cerevisiae Fcy1p; mutation is associated with resistance to flucytosine (5-FC) in a clinical isolate; hyphal downregulated; gene has intron	1.14638	0.31472
orf19.1565_1777	ORF19.1565		Protein of unknown function	1.14623	0.01725
orf19.2146_728	ORF19.2146	HAT2	Putative Hat1-Hat2 histone acetyltransferase complex subunit; role in DNA damage repair and morphogenesis; mutations cause constitutive pseudohyphal growth, caspofungin sensitivity; rat catheter and Spider biofilm repressed	1.14617	0.11773
orf19.952_2261	ORF19.952		Has domain(s) with predicted DNA binding activity	1.14616	0.19137
orf19.874_999	ORF19.874		Predicted mitochondrial i-AAA protease supercomplex; degrades misfolded mitochondrial proteins; Hap43-repressed gene	1.14612	0.23888
orf19.2468_783	ORF19.2468		Ortholog(s) have trans-aconitate 3-methyltransferase activity and cytosol, nucleus localization	1.14607	0.04586
orf19.7618_772	ORF19.7618		Putative nucleolar protein with a predicted role in pre-18S rRNA processing; Plc1p-regulated; Spider biofilm induced	1.14594	0.05222
orf19.6886_1040	ORF19.6886		Ortholog(s) have rRNA binding activity, role in maturation of LSU-rRNA from tricistronic rRNA transcript (SSU-rRNA, 5.8S rRNA, LSU-rRNA), ribosomal large subunit export from nucleus and nucleolus localization	1.14591	0.12494
orf19.804_853	ORF19.804		Putative mitochondrial carrier family transporter; rat catheter biofilm induced	1.14583	0.07049
orf19.1950_331	ORF19.1950		Ortholog(s) have phosphatase activity	1.14582	0.12419
orf19.955_864	ORF19.955		Protein of unknown function; Spider biofilm repressed	1.14575	0.12555
orf19.6738_1400	ORF19.6738	VAN1	Member of Mnn9 family of mannosyltransferases; ortholog of S. cerevisiae Van1p; fungal-specific (no human or murine homolog)	1.14574	0.14674
orf19.529_2249	ORF19.529		Ortholog of C. dubliniensis CD36 : Cd36_29750, C. parapsilosis CDC317 : CPAR2_205260, Candida tenuis NRRL Y-1498 : CANTEDRAFT_91782 and Debaryomyces hansenii CBS767 : DEHA2F19294g	1.14569	0.02626
orf19.6090_1005	ORF19.6090		Putative nucleolar protein with a predicted role in pre-rRNA processing and ribosome biogenesis; repressed by nitric oxide; required for flow model biofilm formation; Spider biofilm repressed	1.1456	0.31345
orf19.2087_848	ORF19.2087	SAS2	Predicted histone acetyltransferase involved in histone H4 acetylation; member of MYST family	1.14541	0.12289
orf19.4651_84	ORF19.4651	PGA53	GPI-anchored cell surface protein of unknown function; greater mRNA abundance observed in a cyr1 homozygous null mutant than in wild type	1.14537	0.06909
orf19.93_313	ORF19.93		Putative mitochondrial intermembrane space protein; colony morphology-related gene regulation by Ssn6; regulated by Sef1, Sfu1, and Hap43; Spider biofilm repressed; rat catheter biofilm induced	1.14522	0.24911
orf19.6184_59	ORF19.6184		Protein of unknown function; Spider biofilm repressed	1.14516	0.00822
orf19.685_853	ORF19.685	YHM1	Putative mitochondrial carrier protein; fungal-specific (no human or murine homolog); Hap43p-repressed gene	1.14512	0.16544
orf19.3275_316	ORF19.3275		Ortholog of C. dubliniensis CD36 : Cd36_25870, C. parapsilosis CDC317 : CPAR2_804000, Candida tenuis NRRL Y-1498 : CANTEDRAFT_115661 and Debaryomyces hansenii CBS767 : DEHA2B05852g	1.14507	0.00538
orf19.1507_1498	ORF19.1507	AMN1	Putative negative regulator of exit from mitosis; Plc1-regulated; rat catheter biofilm induced	1.14499	0.09687
orf19.1434_2089	ORF19.1434		Ortholog(s) have protein kinase activator activity	1.14497	0.02529
orf19.3415.1_337	ORF19.3415.1	RPL32	Component of the large (60S) ribosomal subunit; Spider biofilm repressed	1.14497	0.06006
orf19.2828_371	ORF19.2828		Ortholog(s) have alpha-tubulin binding, microtubule binding activity, role in establishment or maintenance of cell polarity, post-chaperonin tubulin folding pathway and cytosol, nucleus localization	1.14494	0.04107
orf19.6737_375	ORF19.6737		Protein of unknown function; mutants are viable; induced in a cyr1, ras1, or efg1 homozygous null	1.14489	0.08318
orf19.2850_5405	ORF19.2850		Protein of unknown function; induced by nitric oxide independent of Yhb1p	1.14486	0.02544
orf19.7215_5395	ORF19.7215		Nucleolar protein; component of the small subunit processome containing the U3 snoRNA; involved in pre-18S rRNA processing; flow model biofilm repressed	1.1448	0.00142
orf19.4449_582	ORF19.4449	CCS1	Copper chaperone involved in activation and protection of superoxide dismutase Sod1p	1.1447	0.0468
orf19.1483_38	ORF19.1483		Ortholog(s) have copper ion binding activity, role in mitochondrial respiratory chain complex IV assembly and extrinsic to mitochondrial inner membrane, mitochondrial intermembrane space localization	1.14465	0.16657
orf19.7547_856	ORF19.7547		Ortholog(s) have phosphatidylinositol-3-phosphate binding, ubiquitin-protein ligase activity, role in protein ubiquitination and cytosol, fungal-type vacuole membrane, late endosome, nucleus localization	1.14436	0.12221
orf19.3925_263	ORF19.3925		Putative protein of unknown function, transcription is activated in the presence of elevated CO2	1.14433	0.5591
orf19.4532_1006	ORF19.4532		Protein of unknown function; present in exponential and stationary growth phase yeast cultures	1.14426	0.02594
orf19.639.1_9	ORF19.639.1		Ortholog(s) have structural constituent of ribosome activity and mitochondrial large ribosomal subunit localization	1.14419	0.2322
orf19.7561_2592	ORF19.7561	DEF1	RNA polymerase II regulator; role in filamentation, epithelial cell escape, dissemination in RHE model; induced by fluconazole, high cell density; Efg1/hyphal regulated; role in adhesion, hyphal growth on solid media; Spider biofilm induced	1.14418	0.06925
orf19.515_187	ORF19.515		Has domain(s) with predicted nucleic acid binding, zinc ion binding activity	1.14417	0.04962
orf19.6291_3149	ORF19.6291		Ortholog(s) have DNA binding, DNA-dependent ATPase activity, chromatin binding activity	1.1441	0.0711
orf19.2601_1628	ORF19.2601	HEM1	Putative 5-aminolevulinate synthase; caspofungin repressed; induced by high iron, nitric oxide; regulated by Ssn6; Hap43-repressed; Spider biofilm induced	1.1441	0.16829
orf19.1169_885	ORF19.1169		Putative DnaJ-like molecular chaperone; Spider biofilm induced	1.14409	0.07856
orf19.7328_2576	ORF19.7328		Protein with a Staphylococcal nuclease domain; transcript regulated by Mig1 and Tup1; flow model and Spider biofilm repressed	1.14405	0.03583
orf19.4652_208	ORF19.4652		Protein of unknown function; rat catheter biofilm induced	1.144	0.20773
orf19.6898_808	ORF19.6898		Protein similar to S. pombe SPBC1709.16c a predicted aromatic ring-opening dioxygenase; induced by benomyl treatment or in azole-resistant strain that overexpresses MDR1; Spider biofilm induced	1.14399	0.03299
orf19.3400_841	ORF19.3400	COQ3	Protein with a predicted role in coenzyme Q biosynthesis; transcriptionally induced by interaction with macrophages; possibly an essential gene, disruptants not obtained by UAU1 method	1.14387	0.00245
orf19.2092_1137	ORF19.2092		Putative peroxisomal cystathionine beta-lyase; Gcn4p-regulated	1.14375	0.05912
orf19.7437_583	ORF19.7437		Putative protein of unknown function; Hap43p-repressed gene; ortholog of S. cerevisiae YJL218W	1.1437	0.10278
orf19.1973_977	ORF19.1973	HAP5	Component of CCAAT-binding transcription factor; roles in filamentous growth, low-iron induction of FRP1; regulates genes involved in respiratory growth; functional homolog of S. cerevisiae Hap5p; Cap1p-dependent expression in low iron	1.14366	0.029
orf19.6931_1357	ORF19.6931		Putative cleavage factor I subunit; heterozygous null mutant exhibits hypersensitivity to parnafungin and cordycepin in the C. albicans fitness test	1.14352	0.06362
orf19.5174_268	ORF19.5174	TAF19	Putative TFIID subunit; mutation confers hypersensitivity to amphotericin B; rat catheter biofilm induced	1.14342	0.12955
orf19.6124_2061	ORF19.6124	ACE2	Transcription factor; similar to S. cerevisiae Ace2 and Swi5; regulates morphogenesis, cell separation, adherence, virulence in a mice; mutant is hyperfilamentous; rat catheter and Spider biofilm induced	1.14341	0.41622
orf19.1441_1510	ORF19.1441		Ortholog of C. dubliniensis CD36 : Cd36_16230, C. parapsilosis CDC317 : CPAR2_213950, Candida tenuis NRRL Y-1498 : CANTEDRAFT_112720 and Debaryomyces hansenii CBS767 : DEHA2A01848g	1.14338	0.12845
orf19.3065_38	ORF19.3065	DAO1	Putative D-amino acid oxidase; transcription is regulated upon yeast-hyphal switch	1.14338	0.09043
orf19.2351_847	ORF19.2351	NIT3	Putative nitrilase; regulated by Gcn2p and Gcn4p; protein present in exponential and stationary growth phase yeast cultures	1.14336	0.11755
orf19.1359_1586	ORF19.1359		Ortholog(s) have protein complex binding activity, role in ER-associated ubiquitin-dependent protein catabolic process, sporulation resulting in formation of a cellular spore and cytoplasm, extrinsic to membrane, nucleus localization	1.14327	0.02595
orf19.5210_1496	ORF19.5210		Putative Xbp1 transcriptional repressor; binds to cyclin gene promoters in S. cerevisiae; Hap43-repressed; possibly essential, disruptants not obtained by UAU1 method	1.14322	0.05557
orf19.4735_863	ORF19.4735		Ornithine cyclodeaminase family protein; Sef1, Sfu1, and Hap43-regulated; ortholog of S. cerevisiae YGL159W and S. pombe SPAP11E10.01; rat catheter biofilm induced	1.14319	0.91345
orf19.5704_2090	ORF19.5704		Ortholog(s) have rRNA binding activity, role in mitochondrial RNA processing, mitochondrial genome maintenance, rRNA metabolic process and mitochondrion localization	1.14318	0.28211
orf19.58_2158	ORF19.58	RRP6	Putative nuclear exosome exonuclease component; Hap43p-induced gene; mutation confers hypersensitivity to 5-fluorocytosine (5-FC), 5-fluorouracil (5-FU), and tubercidin (7-deazaadenosine)	1.14318	0.21357
orf19.2068_1316	ORF19.2068		Ortholog of C. dubliniensis CD36 : Cd36_15550, C. parapsilosis CDC317 : CPAR2_213190, Candida tenuis NRRL Y-1498 : CANTEDRAFT_119026 and Debaryomyces hansenii CBS767 : DEHA2G08514g	1.14316	0.26423
orf19.2057_2402	ORF19.2057		Ortholog(s) have ATP binding, ATPase activity, metallopeptidase activity, role in protein complex assembly, proteolysis, signal peptide processing and m-AAA complex, mitochondrial inner boundary membrane localization	1.14304	0.01057
orf19.945_553	ORF19.945	VPS2	Ortholog(s) have role in intralumenal vesicle formation, protein retention in Golgi apparatus, protein targeting to vacuole involved in ubiquitin-dependent protein catabolic process via the multivesicular body sorting pathway	1.14304	0.06919
orf19.5451_179	ORF19.5451		Ortholog of Candida guilliermondii ATCC 6260 : PGUG_05321, Candida lusitaniae ATCC 42720 : CLUG_00887 and Candida albicans WO-1 : CAWG_02354	1.14303	0.03609
orf19.5651_2113	ORF19.5651		Ortholog(s) have histone demethylase activity (H3-dimethyl-K4 specific), histone demethylase activity (H3-trimethyl-K4 specific) activity	1.14301	0.08563
orf19.863_521	ORF19.863		Ortholog(s) have structural constituent of ribosome activity and mitochondrial large ribosomal subunit localization	1.14288	0.06806
orf19.4004_1531	ORF19.4004	CCT3	Putative cytosolic chaperonin Cct ring complex subunit; mutation confers hypersensitivity to cytochalasin D	1.14275	0.08455
orf19.4611_913	ORF19.4611		Ortholog(s) have ribose phosphate diphosphokinase activity, role in 5-phosphoribose 1-diphosphate biosynthetic process, cytokinesis, fungal-type cell wall organization and cytosol localization	1.14274	0.01415
orf19.2563_2552	ORF19.2563		Ortholog(s) have U6 snRNA binding activity, role in spliceosomal complex assembly, spliceosomal tri-snRNP complex assembly and U6 snRNP localization	1.14271	0.01091
orf19.3053_487	ORF19.3053		Protein of unknown function; present in exponential and stationary phase yeast; identified in extracts from biofilm and planktonic cells; flow model biofilm induced gene; GlcNAc-induced protein	1.14268	0.00502
orf19.1901_2428	ORF19.1901	MCM3	Putative DNA replication protein; periodic mRNA expression, peak at cell-cycle M/G1 phase; Spider biofilm induced	1.1426	0.04605
orf19.920_774	ORF19.920	RMT2	Minor protein arginine methyltransferases (PRMT) involved in methylation of arginine residues	1.1426	0.2563
orf19.357_271	ORF19.357		Ortholog(s) have role in inner mitochondrial membrane organization, mitochondrion inheritance, mitochondrion morphogenesis, negative regulation of proteolysis, protein folding, replicative cell aging	1.14247	0.05623
orf19.4062_1056	ORF19.4062	TRY2	Transcription factor; regulator of yeast form adherence; required for yeast cell adherence to silicone substrate; Spider biofilm induced	1.14217	0.0699
orf19.6862_1873	ORF19.6862		Hap43-induced gene; mutation confers hypersensitivity to 5-fluorocytosine (5-FC), 5-fluorouracil (5-FU), and tubercidin (7-deazaadenosine)	1.14214	0.05112
orf19.4607_1177	ORF19.4607		Possible Golgi membrane protein; Hap43-repressed; hypha induced; flow model biofilm induced; Spider biofilm induced	1.14207	0.04504
orf19.2847.1_716	ORF19.2847.1		Pseudogene; formerly an ORF Predicted by Annotation Working Group that was subsequently removed from Assembly 20	1.14202	0.26141
orf19.7502_718	ORF19.7502		Protein of unknown function; Hap43-induced gene; upregulated in a cyr1 null mutant; Spider biofilm induced	1.14191	0.23289
orf19.2446_728	ORF19.2446		Ortholog(s) have cell division site, cell tip, cytoplasm, nucleus localization	1.14182	0.22445
orf19.5905_82	ORF19.5905		Protein of unknown function; Hap43-induced; F-12/CO2 early biofilm induced	1.1418	0.51319
orf19.1591_956	ORF19.1591	ERG10	Acetyl-CoA acetyltransferase; role in ergosterol biosynthesis; soluble in hyphae; changes in protein abundance associated with azole resistance; fluconazole or ketoconazole induced; macrophage-downregulated protein; GlcNAc-induced protein	1.14175	0.39876
orf19.6997_519	ORF19.6997	ATO5	Putative fungal-specific transmembrane protein	1.14173	0.02398
orf19.6449_1703	ORF19.6449		Ortholog of C. dubliniensis CD36 : Cd36_34310	1.14171	0.24169
orf19.2633.1_70	ORF19.2633.1		Ortholog of C. dubliniensis CD36 : Cd36_00150 and Lodderomyces elongisporus NRLL YB-4239 : LELG_01269	1.14171	0.1151
orf19.5204_1488	ORF19.5204		Ortholog(s) have role in cellular response to methylmercury and cytoplasm, nucleus localization	1.14164	0.22256
orf19.2208_4049	ORF19.2208		Ortholog(s) have role in response to salt stress and cytoplasm localization	1.14163	0.0531
orf19.3590_808	ORF19.3590	IPP1	Putative inorganic pyrophosphatase; antigenic; soluble protein in hyphae; macrophage-induced protein; protein present in exponential and stationary phase yeast; possibly essential (UAU1 method); sumoylation target; Spider biofilm repressed	1.14163	0.06172
orf19.4367_3504	ORF19.4367	SMC1	Protein similar to chromosomal ATPases; RNA abundance regulated by tyrosol and cell density; cell-cycle regulated periodic mRNA expression	1.14163	0.02874
orf19.5019_1909	ORF19.5019		Ortholog of C. dubliniensis CD36 : Cd36_12800, C. parapsilosis CDC317 : CPAR2_203460, Candida tenuis NRRL Y-1498 : CANTEDRAFT_94106 and Debaryomyces hansenii CBS767 : DEHA2C13948g	1.14153	0.08706
orf19.4160_1268	ORF19.4160		Ortholog(s) have serine-type endopeptidase activity, role in glycoprotein metabolic process, mitochondrial tRNA threonylcarbamoyladenosine modification and mitochondrion localization	1.14147	0.09294
orf19.674_941	ORF19.674		Ortholog(s) have U6 snRNA binding, pre-mRNA binding activity and role in mRNA cis splicing, via spliceosome, spliceosomal snRNP assembly	1.14146	0.01827
orf19.6755_1379	ORF19.6755	DLD2	Ortholog(s) have D-lactate dehydrogenase (cytochrome) activity, role in aerobic respiration, cellular carbohydrate metabolic process and mitochondrial inner membrane localization	1.14146	0.10523
orf19.2397_1311	ORF19.2397		Predicted membrane transporter, member of the anion:cation symporter (ACS) family, major facilitator superfamily (MFS); amphotericin B, caspofungin repressed; Hap43p-repressed	1.14144	0.09866
orf19.5920_349	ORF19.5920		Ortholog of C. dubliniensis CD36 : Cd36_84570, C. parapsilosis CDC317 : CPAR2_404420, Candida tenuis NRRL Y-1498 : CANTEDRAFT_115339 and Debaryomyces hansenii CBS767 : DEHA2G13618g	1.14139	0.29962
orf19.2852_326	ORF19.2852		Ortholog(s) have structural constituent of ribosome activity, role in mitochondrial translational initiation and mitochondrial small ribosomal subunit localization	1.14132	0.05161
orf19.4757_1479	ORF19.4757	NAR1	Putative cytosolic iron-sulfur (FeS) protein assembly machinery protein; induced by nitric oxide; oxidative stress-induced via Cap1p	1.1412	0.02174
orf19.3048_2008	ORF19.3048		Protein of unknown function; repressed by alpha pheromone in SpiderM medium	1.14117	0.67395
orf19.2985_351	ORF19.2985		Protein of unknown function; Hap43-repressed gene	1.14112	7.82072e-05
orf19.3230_3451	ORF19.3230	BOI2	Putative SH3-domain-containing protein; mutation confers hypersensitivity to toxic ergosterol analog; Spider biofilm induced	1.14112	0.07772
orf19.7139_322	ORF19.7139		Ortholog(s) have role in mRNA splicing, via spliceosome	1.14094	0.16616
orf19.1429_10	ORF19.1429	SOH1	Subunit of the RNA polymerase II mediator complex; involved in control of cytokinesis, morphogenesis, biofilm formation, virulence; cell-cycle regulated periodic mRNA expression	1.14084	0.15415
orf19.7118_338	ORF19.7118		Ortholog(s) have adenylate kinase activity, nucleoside triphosphate adenylate kinase activity, role in nucleotide metabolic process and mitochondrial inner membrane localization	1.14082	0.03608
orf19.6411_2566	ORF19.6411		Protein similar to S. cerevisiae Vac14p; a protein involved in regulated synthesis of PtdIns(3,5)P(2); transposon mutation affects filamentous growth	1.1408	0.05835
orf19.6794_562	ORF19.6794	FESUR1	Putative ubiquinone reductase; transcriptionally induced by interaction with macrophage; alkaline downregulated; repressed by nitric oxide; clade-associated gene expression; Hap43p-repressed gene	1.14079	0.08608
orf19.4683_4695	ORF19.4683	MLP1	Ortholog(s) have ribonucleoprotein complex binding activity	1.14074	0.06411
orf19.864_2982	ORF19.864		Ortholog(s) have role in nuclear-transcribed mRNA catabolic process, 3'-5' exonucleolytic nonsense-mediated decay and cytosol, polysome localization	1.14062	0.06956
orf19.150_337	ORF19.150	TIM17	Predicted component of the Translocase of the Inner Mitochondrial membrane (TIM23 complex), involved in protein import into mitochondria	1.14061	0.23252
orf19.6563.1_200	ORF19.6563.1		Ortholog(s) have role in mitochondrial respiratory chain complex IV assembly, negative regulation of mitochondrial translation and integral to mitochondrial inner membrane localization	1.14052	0.09335
orf19.6185_33	ORF19.6185		Putative pseudouridine-5'-phosphate glycosidase; overlaps orf19.6186 and orf19.6187; Spider biofilm repressed	1.14049	0.48787
orf19.7433_3232	ORF19.7433		Ortholog(s) have nucleocytoplasmic transporter activity, structural constituent of nuclear pore activity	1.14039	0.15054
orf19.4110_2992	ORF19.4110		Ortholog of C. dubliniensis CD36 : Cd36_20490, C. parapsilosis CDC317 : CPAR2_104180, Candida tenuis NRRL Y-1498 : CANTEDRAFT_116074 and Debaryomyces hansenii CBS767 : DEHA2F05148g	1.14037	0.00493
orf19.5833_917	ORF19.5833		Ortholog(s) have polyubiquitin binding activity	1.14037	0.09301
orf19.7033_3144	ORF19.7033		Putative dual specificity protein phosphatase, similar to S. cerevisiae Pps1p	1.14028	0.00623
orf19.1956_2081	ORF19.1956		Ortholog(s) have role in reciprocal meiotic recombination and mitochondrion localization	1.14025	0.03539
orf19.4969_4450	ORF19.4969	KEM1	5'->3' exoribonuclease of cytoplasmic stress granules; role in filamentous growth; complements slow growth/mating of S. cerevisiae kem1 mutant; required for SD or Spider medium biofilm formation	1.14022	0.2161
orf19.2911_2237	ORF19.2911	SEC3	Predicted subunit of the exocyst complex, involved in exocytosis; required for hyphal growth after the first septin ring formation; interacts with septins Cdc3p, Cdc10p, and Cdc11p; localizes to a crescent on the surface of the hyphal tip	1.14017	0.04019
orf19.3970_365	ORF19.3970		Putative ribosome biogenesis factor; possibly essential, disruptants not obtained by UAU1 method; rat catheter and Spider biofilm induced	1.14013	0.11816
orf19.7654_934	ORF19.7654	CPR6	Putative peptidyl-prolyl cis-trans isomerase; macrophage/pseudohyphal-repressed; heavy metal (cadmium) stress-induced; heterozygous null mutant displays sensitivity to virgineone; rat catheter biofilm induced	1.14013	0.07223
orf19.3685_2695	ORF19.3685	PSY2	Putative protein phosphatase PP4 complex subunit; macrophage-induced gene	1.14006	0.03651
orf19.4015_1210	ORF19.4015	CAG1	heterotrimeric G protein alpha subunit; positive role in mating pheromone response; opaque-enriched transcript; transcript repressed by MTLa1-MTLalpha2; regulated by hemoglobin-responsive Hbr1 via MTL genes; rat catheter biofilm repressed	1.14001	0.2233
orf19.1683_878	ORF19.1683	PPH21	Putative protein phosphatase of the Type 2A-related family (serine/threonine-specific), similar to S. cerevisiae Pph21p; caspofungin repressed; possibly an essential gene, disruptants not obtained by UAU1 method	1.13993	0.81794
orf19.2381_737	ORF19.2381		Protein of unknown function; possibly an essential gene, disruptants not obtained by UAU1 method	1.13992	0.07738
orf19.6008_2714	ORF19.6008		S. cerevisiae ortholog YLL032C interacts with ribosomes; repressed by alpha pheromone in SpiderM medium	1.13976	0.02838
orf19.5181_3006	ORF19.5181	NIK1	Histidine kinase involved in a two-component signaling pathway that regulates cell wall biosynthesis; required for wild-type virulence in mouse systemic infection but not for wild-type growth or drug sensitivity/resistance; 9 HAMP domains	1.13976	0.37454
orf19.416_1062	ORF19.416		Ortholog of C. dubliniensis CD36 : Cd36_05200, C. parapsilosis CDC317 : CPAR2_107660, Candida tenuis NRRL Y-1498 : cten_CGOB_00159 and Debaryomyces hansenii CBS767 : DEHA2E07854g	1.13956	0.37849
[truncated: 9,574 more rows]
